# Supplementary material for: High-throughput profiling of sequence recognition by tyrosine kinases and SH2 domains using bacterial peptide display
Source: bioRxiv preprint, doi:10.1101/2022.08.01.502334, version 3 (2023-01-31)
Supplement: Figure 4-source data 1 [file 502334_file04.xlsx]

## Sheet: kinase-vs-peptide
Index	Name	Gene	Phosphosite	Sequence	# of Ys	c-Src (mean)	c-Src (stdev)	Fyn (mean)	Fyn (stdev)	Hck (mean)	Hck (stdev)	c-Abl (mean)	c-Abl (stdev)	Jak2 (mean)	Jak2 (stdev)	AncSZ (mean)	AncSZ (stdev)	Fer (mean)	Fer (stdev)	Fes (mean)	Fes (stdev)	FGFR1 (mean)	FGFR1 (stdev)	FGFR3 (mean)	FGFR3 (stdev)	EPHB1 (mean)	EPHB1 (stdev)	EPHB2 (mean)	EPHB2 (stdev)	MERTK (mean)	MERTK (stdev)
1	A2M_Y708	A2M	Y708	LRVGFYESDVM	1	1.33135	0.276988	1.28219	0.786961	0.996312	0.0932688	1.89682	0.458942	2.03471	0.573367	2.97449	0.89854	1.61958	0.467239	3.124	1.54424	1.39236	0.831609	2.88716	2.16791	1.86529	0.243672	0.933594	0.76518	2.60972	0.58033
2	A2M_Y708_R704H	A2M	Y708	LHVGFYESDVM	1	0.676093	0.252558	0.691125	0.300611	0.742801	0.327304	0.761204	0.177867	1.33561	0.319362	1.18255	0.326758	1.9045	0.461111	1.58442	0.401237	0.888635	0.575798	1.20984	0.916547	1.40582	0.505391	1.14177	0.237376	1.15406	0.334872
3	A2M_Y817	A2M	Y817	ATVLNYLPKCI	1	0.384718	0.0674602	0.436812	0.0921641	0.598988	0.285075	0.714249	0.204869	0.858107	0.129196	0.747442	0.21664	0.438245	0.165226	0.986717	0.172776	0.519184	0.153942	0.649025	0.154029	0.662253	0.0950213	0.54178	0.0847404	0.392394	0.156896
4	A2M_Y817_L815Q	A2M	Y817	ATVQNYLPKCI	1	0.361517	0.0404646	0.368777	0.0851105	0.346194	0.0844151	0.687039	0.170077	0.687643	0.220098	0.625712	0.134423	0.406226	0.0581934	0.862395	0.308642	0.462442	0.111744	0.488651	0.0931214	0.390279	0.0584222	0.481788	0.183921	0.37215	0.0546758
5	AACS_Y117	AACS	Y117	DRVALYIAREG	1	0.43168	0.0628836	0.468459	0.274573	0.568889	0.299032	0.730976	0.0662152	1.01637	0.0641547	0.956893	0.144195	0.483704	0.113852	1.14436	0.175708	0.518779	0.0813952	0.716548	0.211851	0.670662	0.184735	0.533501	0.199181	0.395163	0.119342
6	AACS_Y117_I118V	AACS	Y117	DRVALYVAREG	1	0.366693	0.0614717	0.466513	0.260095	0.680137	0.477276	0.589457	0.125228	0.822537	0.108725	0.799949	0.296679	0.498091	0.10869	1.00883	0.336559	0.503149	0.16153	0.70485	0.320176	0.621458	0.350025	0.763169	0.500583	0.290541	0.100346
7	AASDH_Y870	AASDH	Y870	TTGLIYIGSHD	1	0.408307	0.0242192	0.374681	0.115744	0.459726	0.149031	0.488403	0.0673298	0.715265	0.0404683	0.726265	0.0767336	0.423674	0.134123	0.759108	0.108574	0.445303	0.0785285	0.790319	0.68377	0.685939	0.221214	0.565433	0.196644	0.322904	0.104746
8	AASDH_Y870_T865A	AASDH	Y870	ATGLIYIGSHD	1	0.491518	0.134307	0.42707	0.124918	0.469394	0.295403	0.881092	0.413321	0.809261	0.0899618	0.826527	0.116779	0.520222	0.200079	1.14489	0.103398	0.426989	0.0822334	0.683619	0.257245	0.723631	0.142355	0.72427	0.166756	0.543194	0.127553
9	AASS_Y188	AASS	Y188	GMAHNYRNSSQ	1	0.386319	0.0892485	0.445567	0.215973	0.413535	0.0744508	0.312731	0.0552439	0.433535	0.108972	0.588603	0.122824	0.384089	0.0489171	0.45023	0.106911	0.371267	0.0425912	0.430549	0.073557	0.255027	0.102462	0.469868	0.128048	0.418354	0.126861
10	AASS_Y188_S191R	AASS	Y188	GMAHNYRNRSQ	1	0.480918	0.0962097	0.487326	0.271667	0.523404	0.27758	0.569846	0.230774	0.487868	0.223024	0.599391	0.208555	0.357548	0.1478	0.628694	0.229904	0.344406	0.132364	0.401099	0.0473058	0.414288	0.162032	0.388463	0.0551197	0.466289	0.178017
11	AATK_Y93	AATK	Y93	NGPDVYVLPLT	1	1.03694	0.161024	2.32432	0.733444	0.6708	0.286435	0.645477	0.0874069	0.800391	0.0735338	1.33309	0.444759	0.414463	0.0732147	0.79151	0.0556365	0.685383	0.127016	0.612976	0.0388215	0.625674	0.160835	0.511423	0.155433	1.68521	0.0394311
12	AATK_Y93_L97V	AATK	Y93	NGPDVYVLPVT	1	1.2044	0.25945	2.25149	0.82082	0.77572	0.345952	0.786896	0.0647609	0.836921	0.180263	1.79076	0.557759	0.453143	0.0466819	1.04881	0.144041	0.720426	0.121969	0.751303	0.0722746	0.72339	0.132981	0.644192	0.170191	2.7305	0.270597
13	ABCA4_Y2063	ABCA4	Y2063	LGLTVYADCLA	1	0.473014	0.0611765	0.589318	0.189955	0.515045	0.185193	0.814887	0.42282	0.992215	0.344925	1.14399	0.210349	0.583711	0.099724	1.38869	0.235543	0.617503	0.190589	0.780428	0.253178	0.685895	0.260777	0.656905	0.27991	0.369268	0.0520276
14	ABCA4_Y2063_G2059A	ABCA4	Y2063	LALTVYADCLA	1	0.620341	0.0987869	0.698716	0.278259	0.730326	0.337929	1.08854	0.356175	1.52995	0.294685	1.41655	0.174096	0.780704	0.151679	1.47463	0.261519	0.664504	0.233358	1.05182	0.331107	1.0761	0.560482	0.93792	0.589236	0.517186	0.137157
15	ABCA4_Y2063_L2060R	ABCA4	Y2063	LGRTVYADCLA	1	0.902772	0.172383	0.901802	0.667195	0.988893	0.457481	1.38482	0.361015	1.75691	0.239834	0.982601	0.415821	1.39827	0.69262	2.65399	1.14211	0.917803	0.328356	1.36609	0.315637	1.26337	0.375401	1.61011	0.48863	0.938631	0.402148
16	ABCB7_Y345	ABCB7	Y345	YETVKYFNNER	2	1.13882	0.135911	1.37224	0.520703	1.82992	0.799256	0.639779	0.126897	0.682728	0.0608	0.881185	0.117674	9.57204	1.64269	0.868755	0.135537	1.9534	0.970192	1.32153	0.759249	0.791721	0.0776111	0.611213	0.221085	0.843501	0.1099
17	ABCB7_Y345_F346I	ABCB7	Y345	YETVKYINNER	2	1.09904	0.0905652	1.21491	0.581222	1.96449	0.757389	0.618798	0.163801	0.803136	0.135854	0.8583	0.161512	10.4883	1.50234	0.94287	0.202156	1.22447	0.370506	0.832238	0.12427	0.729979	0.141501	0.622681	0.155858	0.902505	0.146228
18	ABCB7_Y345_F346I_YF	ABCB7	Y345	FETVKYINNER	1	0.430518	0.0843369	0.452445	0.137205	0.471574	0.173543	0.617127	0.0984688	0.712342	0.151955	0.902908	0.102352	0.423786	0.0905085	0.954437	0.0868587	0.524858	0.0986013	0.639501	0.173381	0.459556	0.101346	0.403001	0.0652922	0.417587	0.0321838
19	ABCB7_Y345_YF	ABCB7	Y345	FETVKYFNNER	1	0.344599	0.13069	0.389669	0.180912	0.380551	0.158683	0.567252	0.153155	0.701898	0.117866	0.82759	0.309799	0.464958	0.116611	0.89764	0.198875	0.417173	0.109131	0.605522	0.287899	0.563732	0.233236	0.444792	0.160595	0.288102	0.063426
20	ABCC1_Y1508	ABCC1	Y1508	GEIQEYGAPSD	1	0.438123	0.0591	0.505741	0.166852	0.504794	0.132492	0.757087	0.21806	0.890815	0.105461	1.07491	0.106411	0.481261	0.0800054	1.04993	0.107257	0.523389	0.0370735	0.661876	0.11531	0.492946	0.103597	0.543934	0.149904	0.476372	0.0137323
21	ABCC1_Y1508_S1512L	ABCC1	Y1508	GEIQEYGAPLD	1	0.485267	0.0939981	0.514423	0.127686	0.485257	0.194435	0.742789	0.285566	1.02942	0.143172	1.14524	0.226547	0.528359	0.0839054	1.09021	0.18233	0.598302	0.253328	0.798402	0.302764	0.740278	0.321921	0.716082	0.282449	0.46652	0.0872109
22	ABCC12_Y7	ABCC12	Y7	VGEGPYLISDL	1	0.752275	0.128504	0.507048	0.169491	0.483346	0.175635	0.767515	0.244184	1.0533	0.114118	0.951894	0.0560066	0.578359	0.0803865	1.00728	0.0936662	0.466481	0.0795672	0.733966	0.198581	0.649869	0.142357	0.500043	0.191922	0.467695	0.0697716
23	ABCC12_Y7_I9L	ABCC12	Y7	VGEGPYLLSDL	1	0.710386	0.0661797	0.564524	0.271359	0.431811	0.106941	0.586023	0.146199	0.830436	0.158322	0.839217	0.139261	0.50802	0.0709551	0.941085	0.149963	0.483813	0.102557	0.604915	0.203791	0.460889	0.109978	0.559192	0.268761	0.384834	0.0593381
24	ABCC2_Y845	ABCC2	Y845	VEKGSYSALLA	1	0.492739	0.0624101	0.331976	0.0607985	0.537074	0.159628	0.515993	0.123688	0.690455	0.0983463	0.648245	0.0970259	0.450293	0.0964455	0.535333	0.141657	0.400696	0.0685493	0.456091	0.102224	0.353565	0.0693928	0.392392	0.0687216	0.710006	0.170176
25	ABCC2_Y845_L849R	ABCC2	Y845	VEKGSYSALRA	1	0.31394	0.0191297	0.340078	0.069227	0.350599	0.140276	0.438312	0.147788	0.551288	0.121013	0.4297	0.0580745	0.337941	0.0335064	0.550784	0.12216	0.356	0.022603	0.396317	0.0491522	0.34763	0.0271952	0.296327	0.0347938	0.325002	0.032938
26	ABCC6_Y372	ABCC6	Y372	EQQNMYRLKVL	1	0.452405	0.0645403	0.410151	0.105844	0.475101	0.0759911	0.618841	0.18838	0.561428	0.00705208	0.861357	0.240593	0.487959	0.0786869	0.705945	0.191641	0.521202	0.0834304	0.545023	0.119042	0.560483	0.132621	0.50031	0.271547	0.401322	0.0406125
27	ABCC6_Y372_N370D	ABCC6	Y372	EQQDMYRLKVL	1	0.415246	0.105734	0.386657	0.138317	0.427338	0.122785	0.453191	0.0655166	0.637798	0.11117	0.773687	0.0962126	0.473226	0.162407	0.772933	0.136162	0.450504	0.127684	0.581205	0.0909552	0.353635	0.0586345	0.48229	0.197635	0.375545	0.0614134
28	ABCC8_Y1353	ABCC8	Y1353	NLSVRYDSSLK	1	0.49214	0.0829042	0.352945	0.0616842	0.473083	0.136584	0.550024	0.142525	0.847172	0.165198	0.680186	0.0788027	0.421879	0.128559	0.979843	0.13092	0.446358	0.102019	0.633063	0.322668	0.515004	0.198888	0.456772	0.125563	0.380919	0.0441623
29	ABCC8_Y1353_L1349Q	ABCC8	Y1353	NQSVRYDSSLK	1	0.433493	0.0489299	0.460801	0.0575074	0.42873	0.0644788	0.486527	0.0347559	0.555783	0.0876916	0.523341	0.0457817	0.570135	0.382278	0.600603	0.244988	0.340582	0.0471135	0.455513	0.164881	0.483935	0.0717918	0.4908	0.259434	0.42286	0.0903961
30	ABCC8_Y1353_R1352H	ABCC8	Y1353	NLSVHYDSSLK	1	0.342403	0.048481	0.423914	0.181109	0.453227	0.172683	0.548353	0.258631	0.612352	0.0962039	0.952372	0.205862	0.436748	0.0761446	0.922438	0.24875	0.521562	0.288353	0.602942	0.260507	0.57851	0.17318	0.820388	0.297043	0.339466	0.105888
31	ABCC8_Y1353_R1352P	ABCC8	Y1353	NLSVPYDSSLK	1	0.507506	0.0702673	0.409748	0.0299863	0.445483	0.0674536	0.515986	0.110579	0.587955	0.0846577	0.600767	0.0581256	0.417588	0.0509528	0.67954	0.156025	0.445	0.121351	0.503143	0.0372202	0.450785	0.168638	0.508525	0.223116	0.426206	0.0594234
32	ABCD1_Y180	ABCD1	Y180	FSQQTYYRVSN	2	3.17744	0.307055	1.17458	0.405362	3.203	0.296383	0.719874	0.0988368	6.78014	1.22863	0.830956	0.302896	0.392026	0.0296489	0.755964	0.192094	6.20405	0.882569	4.51433	2.53357	1.83445	0.4443	1.06157	0.265056	2.85208	0.350227
33	ABCD1_Y180_Q178E	ABCD1	Y180	FSQETYYRVSN	2	4.40923	0.360849	1.76973	0.34247	4.19996	0.952894	1.02636	0.358459	6.02895	1.59984	1.26121	0.302262	0.491979	0.0711919	0.811773	0.0738838	4.9572	0.66695	3.84782	1.46795	4.43251	1.3681	2.73395	0.816503	3.77623	0.849442
34	ABCD1_Y180_Q178E_YF	ABCD1	Y180	FSQETYFRVSN	1	1.51282	0.203407	0.592301	0.197286	0.868368	0.268852	0.660938	0.0984394	2.9946	0.830912	1.002	0.142485	0.450366	0.10134	1.10441	0.251402	1.64175	0.675905	1.23246	0.380326	1.07778	0.420848	0.706014	0.125457	0.740377	0.217262
35	ABCD1_Y180_R182P	ABCD1	Y180	FSQQTYYPVSN	2	4.36786	0.416982	2.76119	0.541592	5.05549	1.62707	0.696989	0.182308	7.0717	1.70488	0.804625	0.237495	0.983383	0.276749	0.647488	0.0606824	9.02573	2.0282	6.84568	2.73441	4.57771	2.17468	3.54693	1.56078	7.45767	0.989496
36	ABCD1_Y180_R182P_YF	ABCD1	Y180	FSQQTYFPVSN	1	1.95422	0.203277	0.88931	0.429563	2.49622	0.915787	0.722879	0.0567918	5.50899	1.39708	1.09593	0.318212	0.493816	0.126416	1.01152	0.164847	4.98635	1.63275	3.79943	1.81158	0.945623	0.225978	0.908355	0.258082	3.41707	0.503147
37	ABCD1_Y180_Y181C	ABCD1	Y180	FSQQTYCRVSN	1	0.881298	0.100147	0.556563	0.199164	1.33691	0.461871	0.760026	0.230981	0.764403	0.220559	0.87461	0.164741	0.558003	0.114054	0.980902	0.313013	0.53784	0.130658	0.644167	0.19205	3.39294	1.00699	2.09806	0.511193	0.745222	0.0643265
38	ABCD1_Y180_YF	ABCD1	Y180	FSQQTYFRVSN	1	0.931321	0.141259	0.435252	0.176042	0.748867	0.477079	0.625362	0.135761	3.22494	1.08624	0.901916	0.241534	0.414521	0.0426294	0.722652	0.221694	1.22627	0.446553	1.18664	0.541045	0.653671	0.286527	0.564461	0.282559	0.409527	0.116813
39	ABCD1_Y181	ABCD1	Y181	SQQTYYRVSNM	2	3.00003	0.162539	1.47135	0.475907	3.23193	0.596378	0.79483	0.132851	6.19092	1.58537	0.702565	0.269499	0.400817	0.063833	0.678342	0.20902	7.76962	1.14946	5.82418	2.08697	1.9283	0.250012	1.1162	0.351862	3.23113	0.423202
40	ABCD1_Y181_Q178E	ABCD1	Y181	SQETYYRVSNM	2	2.96474	0.20971	1.99994	1.20524	3.96781	0.787011	1.33314	0.653431	3.84898	1.15134	1.37084	0.768317	0.549339	0.0936243	0.804551	0.212624	6.80899	0.825386	4.94005	2.14263	4.41877	0.383832	2.94634	1.2057	3.69832	0.338744
41	ABCD1_Y181_Q178E_YF	ABCD1	Y181	SQETFYRVSNM	1	0.489732	0.0667333	0.396265	0.132101	0.456683	0.113371	0.859503	0.141509	0.699616	0.109196	0.60978	0.0408777	0.442788	0.0427956	0.762756	0.107334	0.386314	0.101083	0.473082	0.0952643	0.411671	0.0927401	0.527515	0.1273	0.447846	0.0482344
42	ABCD1_Y181_R182P	ABCD1	Y181	SQQTYYPVSNM	2	5.26739	0.274605	3.76739	0.672783	6.8064	2.08463	2.43847	0.538874	9.57116	2.00176	1.31825	0.421953	0.94574	0.378856	0.679887	0.136769	13.5466	3.06496	10.4846	3.31799	5.58441	2.39442	4.23896	2.05296	10.5304	2.14901
43	ABCD1_Y181_R182P_YF	ABCD1	Y181	SQQTFYPVSNM	1	0.398444	0.0808848	0.418689	0.195297	0.406793	0.0760679	0.56992	0.354401	0.598254	0.0532902	0.706424	0.214038	0.318278	0.0464068	0.653645	0.280578	0.506895	0.119307	0.513132	0.155429	0.387038	0.0875993	0.489596	0.135445	0.373516	0.135858
44	ABCD1_Y181_Y181C	ABCD1	Y181	SQQTYCRVSNM	1	0.718122	0.143077	0.751363	0.290427	1.41354	0.682751	0.851288	0.216184	0.622945	0.195541	0.798655	0.12297	0.525811	0.128053	0.879841	0.12532	0.586551	0.134664	0.682538	0.274729	3.76159	0.383054	1.98043	0.424819	0.738137	0.0358914
45	ABCD1_Y181_Y181C_YF	ABCD1	Y181	SQQTFCRVSNM	0	0.411387	0.0948524	0.453013	0.117513	0.500095	0.179187	0.566712	0.0566752	0.554211	0.0479438	0.636061	0.176211	0.408404	0.02605	0.679166	0.114824	0.445921	0.0809285	0.6153	0.212766	0.460582	0.0723604	0.515106	0.102003	0.412167	0.0610947
46	ABCD1_Y181_YF	ABCD1	Y181	SQQTFYRVSNM	1	0.408115	0.0323973	0.408699	0.072498	0.513254	0.0534148	0.492288	0.192775	0.545555	0.0310631	0.563703	0.0899764	0.389704	0.0401259	0.740677	0.155097	0.433147	0.0524431	0.575278	0.204798	0.310138	0.0614389	0.506906	0.075002	0.387966	0.021989
47	ABCD1_Y281	ABCD1	Y281	KGELRYMHSRV	1	0.480384	0.0494985	0.302907	0.088192	0.376685	0.103499	0.516638	0.0895168	0.618157	0.139715	0.568071	0.177421	0.374652	0.170385	0.745693	0.377169	0.427857	0.187186	0.439667	0.108062	0.395596	0.121287	0.347656	0.129019	0.377646	0.0872256
48	ABCD1_Y281_G277R	ABCD1	Y281	KRELRYMHSRV	1	0.312921	0.0567831	0.312036	0.10557	0.380603	0.161553	0.485663	0.054654	0.524541	0.0454274	0.472055	0.251007	0.272184	0.0802095	0.577648	0.290947	0.294747	0.0537099	0.447236	0.159861	0.282105	0.0632283	0.534389	0.409645	0.305324	0.0570544
49	ABCD1_Y281_G277W	ABCD1	Y281	KWELRYMHSRV	1	0.370405	0.0379508	0.457648	0.179533	0.473922	0.149753	0.759141	0.230934	1.07208	0.108033	1.0955	0.131153	0.457384	0.0761195	1.31305	0.235422	0.393429	0.113719	0.685202	0.231889	0.51729	0.117121	0.527593	0.213524	0.368569	0.055949
50	ABCD1_Y281_K276E	ABCD1	Y281	EGELRYMHSRV	1	0.373122	0.0587627	0.507473	0.124024	0.340325	0.0718073	0.519378	0.16738	0.860375	0.0175759	0.688327	0.115997	0.394579	0.0928188	0.68898	0.0887903	0.428214	0.153055	0.485032	0.0996672	0.516302	0.203625	0.438556	0.088997	0.349738	0.0935889
51	ABCD1_Y281_R280C	ABCD1	Y281	KGELCYMHSRV	1	0.402286	0.0447869	0.504733	0.107062	0.484614	0.16654	0.429875	0.100745	0.567506	0.065905	0.812904	0.376601	0.449246	0.117308	0.756718	0.265131	0.479116	0.114835	0.681625	0.302258	0.59736	0.146855	0.580686	0.315188	0.563388	0.0815972
52	ABCD1_Y281_R285P	ABCD1	Y281	KGELRYMHSPV	1	0.364631	0.103386	0.327786	0.0835073	0.344612	0.169199	0.526604	0.119597	0.618815	0.0405817	0.480886	0.0877824	0.314757	0.145245	0.673789	0.167317	0.364038	0.0304159	0.45773	0.132204	0.392688	0.181144	0.366579	0.19005	0.40603	0.065499
53	ABCD1_Y337	ABCD1	Y337	QFLMKYVWSAS	1	0.559321	0.163302	0.300276	0.137758	0.586762	0.234843	0.929483	0.364234	1.41624	0.120008	1.15053	0.511045	0.565	0.261946	1.48624	0.571381	0.513301	0.346129	0.758845	0.396223	0.582047	0.280522	0.54078	0.185928	0.528097	0.15357
54	ABCD1_Y337_K336M	ABCD1	Y337	QFLMMYVWSAS	1	0.779009	0.205267	0.464706	0.187826	0.912237	0.404323	1.27128	0.578279	1.45721	0.236854	1.53398	0.380576	0.807243	0.363778	1.58438	0.26655	0.426069	0.125646	1.22127	0.414309	0.873112	0.202042	0.93095	0.489196	0.540695	0.0607597
55	ABCD1_Y337_S342P	ABCD1	Y337	QFLMKYVWSAP	1	0.429446	0.0977868	0.562244	0.319705	0.673752	0.191533	0.749199	0.282381	1.33748	0.190427	1.67883	0.465423	0.835705	0.276357	1.62611	0.338667	0.633591	0.235317	1.02882	0.345619	0.833886	0.680364	0.737813	0.292344	0.609661	0.0792032
56	ABCD1_Y337_W339R	ABCD1	Y337	QFLMKYVRSAS	1	0.79895	0.118257	0.60463	0.24087	0.565562	0.0913052	0.819759	0.505287	1.20119	0.315624	0.994979	0.355694	0.559164	0.221936	1.0476	0.386395	0.431463	0.222886	0.872558	0.297459	0.672658	0.269784	0.666479	0.324169	0.475868	0.140782
57	ABCG8_Y209	ABCG8	Y209	RVGNMYVRGLS	1	0.330514	0.104849	0.573981	0.377861	0.675049	0.473302	0.493791	0.173331	0.70929	0.246976	0.672126	0.145217	0.468474	0.197273	0.839439	0.360838	0.580369	0.178445	0.682465	0.244648	0.456684	0.245469	0.470869	0.229077	0.395044	0.131438
58	ABCG8_Y209_V210M	ABCG8	Y209	RVGNMYMRGLS	1	0.552146	0.158868	0.657285	0.538814	0.615225	0.213489	0.452548	0.222232	0.662711	0.180046	0.672032	0.28066	0.468782	0.11766	0.965722	0.339054	0.703517	0.327875	0.595977	0.264903	0.615293	0.211226	0.558686	0.423066	0.696857	0.266395
59	ABHD12_Y345	ABHD12	Y345	LGRKLYSIAAP	1	0.647184	0.169439	0.736908	0.335951	0.730091	0.31426	0.891848	0.342601	2.38099	3.05879	1.3021	0.798197	0.951773	0.463767	1.1317	0.694577	0.542729	0.404192	1.11944	0.719386	0.663727	0.503658	1.0376	0.37326	1.03589	0.157274
60	ABHD12_Y345_A349T	ABHD12	Y345	LGRKLYSIATP	1	0.698335	0.0697845	0.4129	0.0842118	0.672377	0.209231	1.06675	0.489817	1.30198	0.53532	0.772972	0.326741	0.697563	0.662948	1.1745	0.485263	0.611813	0.245647	0.63462	0.0532427	0.575896	0.322601	0.47073	0.151096	1.29255	0.342666
61	ABI1_Y333	ABI1	Y333	TSSGGYRRTPS	1	0.418609	0.0653059	0.433342	0.0736769	0.408998	0.103076	0.486076	0.160297	0.473277	0.127089	0.499066	0.163066	0.47334	0.181757	0.49854	0.153447	0.386272	0.103445	0.428066	0.0637039	0.35455	0.0772602	0.532071	0.221396	0.467232	0.100679
62	ABI1_Y333_G331A	ABI1	Y333	TSSAGYRRTPS	1	0.443993	0.0977468	0.484362	0.096234	0.446383	0.0366441	0.5759	0.155667	0.475665	0.1065	0.564868	0.0897744	0.359538	0.0854429	0.593697	0.250062	0.499497	0.156947	0.491168	0.116098	0.420297	0.0688261	0.496549	0.325854	0.391682	0.0595942
63	ABL1_Y139	ABL1	Y139	RNAAEYLLSSG	1	0.340214	0.168309	0.349633	0.15182	0.479689	0.149716	0.352824	0.0965539	0.66693	0.20682	0.764702	0.45607	0.596206	0.410041	0.723102	0.441157	0.455558	0.167494	0.446468	0.0904599	0.380499	0.158494	0.345251	0.16718	0.294029	0.0538916
64	ABL1_Y139_L140P	ABL1	Y139	RNAAEYPLSSG	1	0.521528	0.374948	0.400846	0.199538	0.595916	0.331375	0.646585	0.26452	0.409987	0.136148	0.425877	0.18384	0.40194	0.106777	0.898171	0.517867	0.444513	0.148145	0.485325	0.0895332	0.336999	0.0361736	0.344706	0.215776	0.453081	0.100378
65	ABL1_Y167	ABL1	Y167	SISLRYEGRVY	2	0.39358	0.0507458	0.512908	0.251364	0.506413	0.161383	0.803228	0.28323	1.06379	0.178571	1.07403	0.0778852	0.545839	0.147257	1.08823	0.11725	0.484257	0.229334	0.776048	0.170001	0.605597	0.184266	0.563402	0.205393	0.428427	0.152396
66	ABL1_Y167_R166K	ABL1	Y167	SISLKYEGRVY	2	0.510997	0.161762	0.469525	0.0876149	0.506768	0.197702	0.982748	0.43615	1.23645	0.0582733	1.13004	0.176545	0.499437	0.171283	1.38144	0.283451	0.510353	0.180558	0.897366	0.312282	0.663458	0.152661	0.746681	0.242527	0.451244	0.0284731
67	ABL1_Y167_R166K_YF	ABL1	Y167	SISLKYEGRVF	1	0.39838	0.0524171	0.476633	0.206611	0.55252	0.222622	0.661132	0.18141	1.12659	0.0178373	1.05073	0.128476	0.564781	0.0592945	1.31417	0.231341	0.482017	0.0680175	0.770879	0.309956	0.655391	0.325719	0.608961	0.206694	0.381626	0.0394857
68	ABL1_Y167_YF	ABL1	Y167	SISLRYEGRVF	1	0.372435	0.103128	0.437874	0.134498	0.506588	0.162594	0.696149	0.143426	0.917773	0.0607501	1.25394	0.0737232	0.685849	0.263764	1.25665	0.157699	0.52352	0.0868842	0.8376	0.278625	0.635763	0.190618	0.703356	0.233108	0.383532	0.0308622
69	ABL1_Y226	ABL1	Y226	NKPTVYGVSPN	1	0.658763	0.0829836	0.550334	0.100228	0.603224	0.124349	0.670141	0.400876	0.477554	0.145021	0.547425	0.072295	0.442999	0.0804465	0.622504	0.0855558	0.376087	0.0443436	0.446099	0.135838	0.398938	0.0786933	0.372975	0.0964203	0.394714	0.0513174
70	ABL1_Y226_Y226C	ABL1	Y226	NKPTVCGVSPN	0	0.499933	0.0793832	0.438546	0.0714032	0.404285	0.160118	0.995546	0.38648	0.759351	0.249039	0.655413	0.152808	0.440806	0.0629016	0.918992	0.263309	0.526358	0.179935	0.589488	0.0862935	0.475897	0.12818	0.536421	0.198084	0.467234	0.0882655
71	ABL2_Y515	ABL2	Y515	CPPKVYELMRA	1	1.3337	0.225377	1.12623	0.567522	1.81156	0.904031	0.585053	0.107044	0.530479	0.0886243	0.661506	0.183461	6.41396	0.884934	1.04287	0.28693	0.729568	0.180168	0.67922	0.123017	8.37971	0.922825	2.40815	0.739694	3.80751	0.924784
72	ABL2_Y515_R519I	ABL2	Y515	CPPKVYELMIA	1	1.98587	0.275875	0.916261	0.274643	1.02789	0.364284	0.766061	0.168634	1.20253	0.559539	1.23692	0.113212	7.50139	1.37474	1.33599	0.249497	1.34328	0.428228	0.958779	0.281883	7.46272	2.81093	2.25293	0.502244	5.18388	0.82192
73	ABL2_Y80	ABL2	Y80	ALHRPYGCDVE	1	0.323826	0.0354499	0.447221	0.265299	0.378926	0.189869	0.570726	0.103664	0.541226	0.117512	0.871076	0.454437	0.537653	0.322103	0.782066	0.0699553	0.412442	0.146435	0.531089	0.212205	0.589539	0.180455	0.455943	0.250106	0.357457	0.229633
74	ABL2_Y80_R78H	ABL2	Y80	ALHHPYGCDVE	1	0.669228	0.106527	0.440156	0.115111	0.540599	0.215701	0.681415	0.0651538	0.707923	0.0964953	0.803	0.16168	0.44749	0.0610468	0.998182	0.150558	0.440813	0.0674336	0.725843	0.206869	0.60601	0.0424807	0.620999	0.183024	0.440097	0.0486285
75	ABLIM1_Y439	ABLIM1	Y439	PSAEGYQDVRD	1	0.492199	0.0899984	0.68852	0.412696	0.544904	0.243149	0.687677	0.13073	0.872688	0.208159	1.14458	0.281815	0.633846	0.199913	1.08524	0.262518	0.571098	0.0615957	0.698504	0.229343	0.656182	0.435257	0.648976	0.30944	0.347557	0.0664427
76	ABLIM1_Y439_P434T	ABLIM1	Y439	TSAEGYQDVRD	1	0.601827	0.344594	0.67908	0.391296	0.691004	0.295133	0.765946	0.317507	1.16298	0.451771	1.16998	0.337473	0.551369	0.103239	1.35679	0.348917	0.770105	0.399611	0.659464	0.399372	0.730468	0.172012	0.773675	0.412161	0.516617	0.0650447
77	ABLIM1_Y638	ABLIM1	Y638	LLASRYDSPIN	1	0.960056	0.282415	1.17646	0.607577	0.923129	0.473127	1.12824	0.0526491	1.59186	0.237601	1.32334	0.34099	0.606793	0.271825	1.64728	1.10469	1.12462	0.457977	0.635609	0.351556	1.58011	1.412	0.929375	0.319344	1.08857	0.120194
78	ABLIM1_Y638_R637G	ABLIM1	Y638	LLASGYDSPIN	1	0.556074	0.16538	0.528966	0.0266776	0.783359	0.535098	1.0311	0.264495	0.737288	0.404624	1.32852	0.330545	0.422518	0.298129	1.28014	0.520253	0.859366	0.422123	1.09496	0.666146	0.763632	0.231846	0.824834	0.303821	0.520344	0.165643
79	ACAD9_Y325	ACAD9	Y325	EMTAEYACTRK	1	0.412193	0.0738673	0.433587	0.164389	0.627401	0.328224	0.603266	0.16033	0.498789	0.105682	0.703481	0.17554	0.497299	0.127595	0.705609	0.227068	0.39713	0.0509041	0.551481	0.103727	0.406132	0.111897	0.492459	0.296922	0.457161	0.197634
80	ACAD9_Y325_A326T	ACAD9	Y325	EMTAEYTCTRK	1	0.476848	0.110391	0.623772	0.172522	0.698673	0.332081	0.635733	0.0840172	0.756662	0.0545256	1.13841	0.29903	0.5133	0.117134	0.973922	0.315431	0.653694	0.206979	0.636208	0.110441	0.673763	0.298188	0.607336	0.180147	0.464836	0.0251355
81	ACAD9_Y611	ACAD9	Y611	LEKRAYICAHP	1	0.462277	0.164005	0.457349	0.204431	0.47553	0.161924	0.638497	0.195442	0.81786	0.171202	0.943098	0.162384	0.456072	0.0840634	0.969409	0.150037	0.505582	0.121758	0.616258	0.119479	0.534934	0.178993	0.455423	0.198829	0.478763	0.179449
82	ACAD9_Y611_L606H	ACAD9	Y611	HEKRAYICAHP	1	0.44778	0.0417107	0.447485	0.251615	0.489852	0.219737	0.589979	0.23857	1.30524	0.824397	0.74174	0.29735	0.592812	0.173792	0.769739	0.204131	0.542609	0.136001	0.548021	0.076264	0.453618	0.0292719	0.434404	0.146048	0.43861	0.130867
83	ACADM_Y352	ACADM	Y352	GRRNTYYASIA	2	0.637735	0.111262	0.53249	0.222366	0.560049	0.10496	0.571657	0.0527828	0.735428	0.260368	0.653288	0.178858	0.414198	0.104476	0.849092	0.458548	0.449724	0.155408	0.453834	0.0928605	0.350084	0.104474	0.477112	0.12399	0.773798	0.115923
84	ACADM_Y352_Y352C	ACADM	Y352	GRRNTCYASIA	1	0.494757	0.140347	0.442339	0.0504623	0.477421	0.0647363	0.499927	0.156342	0.479934	0.0835335	0.556941	0.117739	0.330292	0.136221	0.643976	0.206615	0.333238	0.0623743	0.432081	0.0429532	0.335735	0.104157	0.365213	0.0555427	0.407251	0.062779
85	ACADM_Y352_Y352C_YF	ACADM	Y352	GRRNTCFASIA	0	0.391079	0.0368409	0.401022	0.0297469	0.364602	0.048436	0.555896	0.0948587	0.710885	0.161059	0.665064	0.143964	0.424057	0.103045	0.69141	0.219934	0.37652	0.0682701	0.405083	0.05137	0.382516	0.0708486	0.347652	0.238094	0.412718	0.0921444
86	ACADM_Y352_YF	ACADM	Y352	GRRNTYFASIA	1	0.614758	0.289606	0.550762	0.250996	0.422727	0.0688808	0.587516	0.0772731	0.500205	0.269561	0.721921	0.17909	0.481166	0.1372	0.556471	0.183734	0.43938	0.132163	0.506824	0.230446	0.345711	0.0344995	0.422561	0.197358	0.466299	0.0334079
87	ACADM_Y353	ACADM	Y353	RRNTYYASIAK	2	0.810424	0.260078	0.761911	0.313547	0.853451	0.466806	0.939445	0.150794	1.11761	0.23648	0.902424	0.409528	0.610693	0.166753	0.888688	0.479745	0.535556	0.313626	0.759837	0.159944	0.702038	0.218753	0.541001	0.261165	1.13329	0.571285
88	ACADM_Y353_Y352C	ACADM	Y353	RRNTCYASIAK	1	0.27944	0.0651352	0.399654	0.186112	0.390834	0.0775342	0.333282	0.167938	0.294445	0.147425	0.368604	0.186191	0.423963	0.101051	0.46689	0.225571	0.272053	0.184789	0.347449	0.142034	0.287375	0.063899	0.332089	0.136902	0.331763	0.0876129
89	ACADM_Y353_YF	ACADM	Y353	RRNTFYASIAK	1	0.638099	0.479535	0.481886	0.105601	0.46285	0.167767	0.508798	0.0712544	0.510537	0.18253	0.604534	0.123059	0.367449	0.22759	0.621734	0.287362	0.441659	0.0645976	0.583251	0.227596	0.452731	0.190373	0.45479	0.328472	0.474186	0.155695
90	ACADM_Y73	ACADM	Y73	DKTGEYPVPLI	1	0.435961	0.0939077	0.407422	0.0939502	0.490165	0.13608	0.550271	0.0931115	0.856162	0.0493605	0.808839	0.0644717	0.442369	0.0883912	0.957009	0.151681	0.467649	0.0820266	0.686714	0.109238	0.527931	0.225529	0.575299	0.231828	0.392398	0.113294
91	ACADM_Y73_I78T	ACADM	Y73	DKTGEYPVPLT	1	0.447529	0.0673486	0.487184	0.152723	0.382492	0.156728	0.569967	0.137535	0.649461	0.0549132	0.863239	0.210261	0.397415	0.0514277	0.902447	0.234268	0.426056	0.0935959	0.578476	0.07505	0.502172	0.179514	0.438365	0.0845964	0.439692	0.0874307
92	ACADSB_Y372	ACADSB	Y372	ASMAKYYASEI	2	0.59458	0.115685	0.491137	0.0855959	0.51482	0.0893485	0.717366	0.342801	0.920267	0.134564	0.700766	0.13239	0.380289	0.170385	0.760966	0.252764	0.483194	0.199674	0.576117	0.15062	0.403806	0.115545	0.319959	0.196196	0.730662	0.195251
93	ACADSB_Y372_E376G	ACADSB	Y372	ASMAKYYASGI	2	0.443768	0.123274	0.451339	0.1215	0.434075	0.140483	0.85115	0.16264	0.603922	0.16375	0.710167	0.218776	0.473039	0.173875	0.653025	0.297484	0.360262	0.198351	0.567766	0.274927	0.327125	0.0848381	0.555786	0.34173	0.51774	0.138075
94	ACADSB_Y372_E376G_YF	ACADSB	Y372	ASMAKYFASGI	1	0.385548	0.0334677	0.38583	0.124513	0.403933	0.0962578	0.574382	0.169293	0.566455	0.122322	0.544345	0.0928594	0.373894	0.073282	0.789614	0.222144	0.42428	0.0874731	0.440691	0.0670528	0.339223	0.096954	0.516705	0.353507	0.407313	0.0528589
95	ACADSB_Y372_YF	ACADSB	Y372	ASMAKYFASEI	1	0.350403	0.136371	0.504229	0.19537	0.384097	0.102187	0.474454	0.0567242	0.81715	0.464955	0.720677	0.18545	0.44877	0.0906689	0.842104	0.194428	0.708818	0.341541	0.780822	0.361555	0.483534	0.211563	0.435999	0.197304	0.4158	0.0509649
96	ACADSB_Y373	ACADSB	Y373	SMAKYYASEIA	2	0.451898	0.118911	0.404122	0.118562	0.473392	0.105332	0.6815	0.357329	0.598931	0.0828333	0.601056	0.0888652	0.494555	0.176933	0.700637	0.194213	0.42561	0.0639271	0.477896	0.0985628	0.45913	0.0757383	0.432814	0.0812696	0.460185	0.0849974
97	ACADSB_Y373_E376G	ACADSB	Y373	SMAKYYASGIA	2	0.394316	0.0613634	0.330981	0.101683	0.463358	0.244417	0.59907	0.140424	0.66455	0.151533	0.497499	0.109535	0.444123	0.0865908	0.622189	0.168178	0.437486	0.0851622	0.468997	0.0330386	0.408108	0.0922593	0.69968	0.481684	0.380909	0.0676972
98	ACADSB_Y373_E376G_YF	ACADSB	Y373	SMAKFYASGIA	1	0.352406	0.0187661	0.461174	0.131873	0.468963	0.0798059	0.510141	0.070442	0.677292	0.286031	0.737874	0.0687296	0.36913	0.0947367	0.635645	0.100911	0.428276	0.0333309	0.561084	0.21019	0.343649	0.0628992	0.484717	0.141306	0.464188	0.189974
99	ACADSB_Y373_YF	ACADSB	Y373	SMAKFYASEIA	1	0.464041	0.115724	0.433928	0.139552	0.517751	0.231136	0.587535	0.0834657	0.619088	0.0866125	0.685861	0.169672	0.609687	0.263157	0.802961	0.159196	0.512807	0.130438	0.60361	0.200542	0.403018	0.147647	0.471557	0.099343	0.436881	0.0610498
100	ACAN_Y100	ACAN	Y100	RVNSAYQDKVS	1	0.484484	0.171593	0.516751	0.214315	0.396252	0.151541	1.06222	0.268858	1.35559	0.35536	0.849001	0.15176	0.436967	0.157208	0.795753	0.237203	0.512584	0.32105	0.567076	0.115854	0.642212	0.126914	0.647827	0.0765179	0.498137	0.086781
101	ACAN_Y100_D102E	ACAN	Y100	RVNSAYQEKVS	1	0.290715	0.0929517	0.378476	0.154141	0.489944	0.48814	0.489371	0.188746	0.537831	0.313192	0.406974	0.0888374	0.312789	0.0744683	0.667457	0.212449	0.677823	0.308975	0.422599	0.253048	0.413457	0.665781	0.397406	0.275694	0.50009	0.248051
102	ACAT1_Y161	ACAT1	Y161	MSNVPYVMNRG	1	0.477972	0.0702627	0.426362	0.0474546	0.398933	0.0554014	0.527145	0.0673255	0.572235	0.19656	0.734211	0.205028	0.377108	0.0825514	0.619404	0.0721291	0.463759	0.13124	0.594267	0.205126	0.367525	0.04779	0.420515	0.1708	0.47378	0.0915134
103	ACAT1_Y161_N158D	ACAT1	Y161	MSDVPYVMNRG	1	0.43862	0.0891958	0.316249	0.0674876	0.357762	0.120716	0.548778	0.0739343	0.652356	0.211419	0.669139	0.135894	0.419757	0.0579638	0.679727	0.128613	0.40292	0.176959	0.501013	0.190773	0.399712	0.114866	0.452021	0.134024	0.348239	0.0660953
104	ACAT1_Y331	ACAT1	Y331	PIAPVYAASMV	1	10.5319	0.61297	14.349	7.65046	13.5198	10.5108	48.502	8.90681	1.34017	0.158883	0.836857	0.475814	8.12059	3.56	1.07247	0.408503	0.744279	0.279802	0.547856	0.240834	2.45368	1.19061	2.18496	1.26329	5.19195	2.36271
105	ACAT1_Y331_A333P	ACAT1	Y331	PIAPVYAPSMV	1	8.41087	0.556368	9.96094	1.61498	20.974	16.3405	49.8129	7.05995	0.737918	0.129779	1.34872	0.466809	16.115	2.90198	1.67446	0.66998	0.778594	0.41982	1.21964	0.616981	2.39935	1.29946	2.71681	1.44002	4.70018	1.77388
106	ACAT1_Y90	ACAT1	Y90	EVKEAYMGNVL	1	0.402081	0.0381808	0.473524	0.202309	0.419777	0.154356	0.505647	0.0640443	0.626463	0.181702	0.803822	0.259616	0.528457	0.14497	0.847651	0.0825904	0.596124	0.314685	0.505136	0.177769	0.341258	0.0741254	0.593414	0.24399	0.443817	0.0700544
107	ACAT1_Y90_N93S	ACAT1	Y90	EVKEAYMGSVL	1	0.591703	0.0571065	0.488827	0.085036	0.446721	0.0623893	0.744138	0.102875	0.830324	0.083434	0.840521	0.168738	0.398469	0.126019	0.995193	0.223267	0.40669	0.16348	0.526543	0.236099	0.485033	0.103042	0.53233	0.137836	0.462687	0.147976
108	ACE_Y151	ACE	Y151	NMSRIYSTAKV	1	0.476946	0.0985699	0.476781	0.0721396	0.528496	0.0935422	0.544992	0.110804	0.535068	0.0894634	0.572936	0.164625	0.415919	0.0767955	0.562967	0.138096	0.451269	0.153504	0.448035	0.0907926	0.341738	0.035459	0.492844	0.104606	0.417491	0.0612221
109	ACE_Y151_A154T	ACE	Y151	NMSRIYSTTKV	1	0.43105	0.0371009	0.425326	0.0950246	0.381619	0.0490789	0.583082	0.100768	0.421171	0.0643337	0.440958	0.0780046	0.31935	0.0662272	0.442659	0.106467	0.34066	0.109762	0.359813	0.0715408	0.296308	0.0240309	0.302418	0.147802	0.365764	0.107105
110	ACO2_Y665	ACO2	Y665	IGDENYGEGSS	1	0.521971	0.0961601	0.529233	0.168239	0.590362	0.169264	0.88219	0.121334	1.39447	0.563011	1.25014	0.469804	0.517545	0.0817239	1.17769	0.148738	0.532682	0.142812	0.738431	0.222129	0.510593	0.0995822	0.605855	0.173597	0.586458	0.161391
111	ACO2_Y665_G661R	ACO2	Y665	IRDENYGEGSS	1	0.481171	0.0447467	0.42146	0.136045	0.925255	0.845886	0.638738	0.294369	0.733039	0.12218	0.917409	0.322669	0.587983	0.228153	0.935942	0.270373	0.436574	0.144751	0.559013	0.200118	0.364416	0.0832963	0.421733	0.126072	0.459972	0.123262
112	ACO2_Y71	ACO2	Y71	SEKIVYGHLDD	1	0.847249	0.135853	0.81673	0.466991	0.638815	0.273997	0.792505	0.346355	0.814892	0.122435	0.828533	0.161491	0.504956	0.104783	1.00143	0.336232	0.431885	0.144004	0.572546	0.134204	0.4991	0.0392409	0.555849	0.286278	0.35909	0.035047
113	ACO2_Y71_L74V	ACO2	Y71	SEKIVYGHVDD	1	0.648665	0.0594475	0.514847	0.114928	0.478806	0.0984108	0.677027	0.123014	0.738177	0.125123	0.715475	0.116815	0.466222	0.0157685	0.804975	0.120131	0.470634	0.0873376	0.528525	0.122521	0.410007	0.0417419	0.468538	0.139886	0.382799	0.0717061
114	ACOT4_Y52	ACOT4	Y52	RAHARYCADAR	1	0.418567	0.083225	0.392453	0.0907394	0.540087	0.350875	0.689251	0.313416	0.533135	0.099713	0.61363	0.119663	0.333028	0.10711	1.08522	0.979562	0.40555	0.178971	0.632621	0.30151	0.444225	0.139973	0.675751	0.297279	0.443901	0.1344
115	ACOT4_Y52_R57C	ACOT4	Y52	RAHARYCADAC	1	0.409559	0.143539	0.343952	0.149564	0.449666	0.137543	0.88874	0.432887	0.609858	0.0978525	0.601215	0.11837	0.518025	0.278539	0.676536	0.159527	0.436099	0.168706	0.395233	0.159329	0.402105	0.168855	0.498985	0.184665	0.437266	0.0230158
116	ACOX1_Y232	ACOX1	Y232	GPKFGYDEIDN	1	0.453499	0.0724714	0.406335	0.158603	0.359365	0.145512	0.53091	0.160977	0.764699	0.229064	0.992765	0.226618	0.344421	0.0711076	0.873871	0.0774414	0.41979	0.0893117	0.526524	0.0823418	0.44022	0.0514287	0.687615	0.331759	0.380828	0.0596161
117	ACOX1_Y232_G231V	ACOX1	Y232	GPKFVYDEIDN	1	0.514448	0.0330942	0.537223	0.118768	0.46722	0.104935	0.651902	0.233044	0.919894	0.266841	1.09633	0.353727	0.409335	0.0333598	1.04234	0.180989	0.481779	0.0670046	0.570167	0.118672	0.505395	0.0478373	0.555711	0.136206	0.412996	0.085403
118	ACOX1_Y275	ACOX1	Y275	SNKLTYGTMVF	1	4.6498	0.141648	5.27461	1.36176	2.90276	0.414397	0.835691	0.257062	0.862994	0.242731	0.772556	0.167045	0.630583	0.269592	1.01694	0.186771	0.459366	0.0385379	0.572604	0.174037	0.5046	0.0695228	0.604081	0.154324	0.494988	0.068605
119	ACOX1_Y275_M278V	ACOX1	Y275	SNKLTYGTVVF	1	5.7831	0.50306	8.00371	2.27257	3.09232	0.583814	0.613289	0.0481611	0.684785	0.110024	0.777167	0.110025	1.00716	0.291	0.844857	0.153666	0.46642	0.0841116	0.616608	0.117371	0.524414	0.0836841	0.724699	0.205918	0.416452	0.0434769
120	ACOXL_Y260	ACOXL	Y260	TIAIRYSHSRR	1	0.691016	0.0536721	0.643771	0.229618	0.576417	0.198532	0.655078	0.29504	0.784649	0.271705	0.746312	0.202402	0.631839	0.204643	0.917737	0.443081	0.536304	0.083521	0.598777	0.205964	0.36334	0.0923128	0.621953	0.340287	0.647563	0.165202
121	ACOXL_Y260_T255M	ACOXL	Y260	MIAIRYSHSRR	1	0.426242	0.113265	0.444229	0.0443034	0.429878	0.111532	0.47275	0.198137	0.434192	0.0651946	0.875039	0.571303	0.324423	0.0793443	0.487272	0.136018	0.376812	0.0753148	0.518448	0.173782	0.539233	0.192035	0.46452	0.0821334	0.35302	0.0448367
122	ACP1_Y132	ACP1	Y132	IIEDPYYGNDS	2	2.72472	0.203571	0.957984	0.334126	0.917622	0.312643	0.849044	0.339964	1.33142	0.253941	1.4613	0.330638	0.632379	0.102222	1.21804	0.248147	0.850521	0.211761	0.86918	0.0395098	0.56087	0.0553197	0.623294	0.249435	0.521841	0.0985791
123	ACP1_Y132_S137F	ACP1	Y132	IIEDPYYGNDF	2	4.90652	0.320583	2.70845	0.195639	1.54672	0.183667	1.08719	0.326381	1.47941	0.272373	1.78777	0.386652	1.42051	0.272566	1.48079	0.245282	3.18321	0.442211	2.88016	0.818471	0.683012	0.150121	0.665814	0.166604	1.15325	0.161841
124	ACP1_Y132_S137F_YF	ACP1	Y132	IIEDPYFGNDF	1	2.98127	0.189717	1.11248	0.427231	0.822671	0.37057	0.871295	0.280024	1.29647	0.0490037	1.3647	0.220272	0.756712	0.10687	1.42793	0.112569	0.790766	0.241448	0.907828	0.129704	0.663698	0.241989	0.694591	0.276793	0.487095	0.0761481
125	ACP1_Y132_YF	ACP1	Y132	IIEDPYFGNDS	1	1.73586	0.181256	0.866644	0.354664	0.960035	0.54179	1.03672	0.295207	1.44984	0.119783	1.58741	0.257981	0.711128	0.173534	1.61998	0.301899	0.695328	0.194175	1.09973	0.305213	0.803961	0.294681	0.620436	0.238775	0.651018	0.0822408
126	ACP1_Y133	ACP1	Y133	IEDPYYGNDSD	2	1.6041	0.158526	0.809619	0.384845	0.758955	0.327272	0.829744	0.246192	1.35537	0.260918	1.50098	0.106078	0.548307	0.0920974	1.39005	0.13805	0.806581	0.129646	1.09084	0.476964	0.637872	0.158791	0.808662	0.439565	0.44986	0.0933141
127	ACP1_Y133_S137F	ACP1	Y133	IEDPYYGNDFD	2	2.94253	0.286672	1.65052	0.423124	1.01937	0.353659	0.930375	0.377158	1.43399	0.138045	1.64479	0.250005	0.785842	0.113184	1.4734	0.191555	1.59958	0.449981	1.70329	0.267724	0.831828	0.348184	0.858762	0.398425	0.513193	0.128091
128	ACP1_Y133_S137F_YF	ACP1	Y133	IEDPFYGNDFD	1	0.544418	0.0443345	0.566152	0.190849	0.594594	0.20718	0.789557	0.204378	0.972122	0.209212	1.26613	0.41844	0.508584	0.169198	1.20656	0.252586	0.547624	0.0817826	0.805947	0.265717	0.830016	0.435437	0.643524	0.150737	0.391629	0.0485005
129	ACP1_Y133_YF	ACP1	Y133	IEDPFYGNDSD	1	0.749942	0.10529	0.556061	0.133942	0.628163	0.103124	1.09851	0.305527	2.1683	0.833506	1.51455	0.567928	0.755059	0.191679	1.5474	0.409483	0.643112	0.156943	0.965795	0.425976	0.781778	0.231241	0.649761	0.0749613	0.487447	0.0888042
130	ACSBG1_Y677	ACSBG1	Y677	AAARPYHIQKW	1	0.620313	0.164897	0.371077	0.146005	0.542883	0.150542	0.673409	0.311279	0.682346	0.0745827	0.601436	0.231313	0.279263	0.109807	0.67548	0.173838	0.461951	0.0967199	0.583568	0.0798937	0.468024	0.0347339	0.465068	0.0572108	0.376967	0.053409
131	ACSBG1_Y677_A673V	ACSBG1	Y677	AVARPYHIQKW	1	0.401383	0.0649135	0.391011	0.0797085	0.40182	0.084619	0.573098	0.153739	0.460811	0.10646	0.643066	0.0775934	0.332358	0.0958309	0.58357	0.147812	0.467508	0.118912	0.506258	0.150487	0.381057	0.158794	0.357882	0.133548	0.36171	0.0694975
132	ACSF3_Y355	ACSF3	Y355	TLLERYGMTEI	1	0.418255	0.0645121	0.387279	0.0887169	0.391641	0.152778	0.51628	0.0901134	0.564933	0.0259667	0.620761	0.0759889	0.419501	0.0112803	0.8625	0.169277	0.404496	0.169892	0.563793	0.0516188	0.415329	0.11505	0.515687	0.258326	0.341784	0.0410491
133	ACSF3_Y355_E359K	ACSF3	Y355	TLLERYGMTKI	1	0.429776	0.0269677	0.483873	0.288575	0.478445	0.128811	0.728391	0.325388	0.624869	0.163078	0.750535	0.164579	0.374403	0.0824341	0.733523	0.225941	0.512819	0.0843718	0.666825	0.125522	0.531194	0.190324	0.593767	0.062209	0.407209	0.0313076
134	ACSF3_Y355_T358I	ACSF3	Y355	TLLERYGMIEI	1	0.47164	0.110127	0.525271	0.159607	0.465287	0.172047	0.801713	0.202512	1.01639	0.121756	0.797955	0.243098	0.631907	0.254057	1.05749	0.139863	0.515213	0.10978	0.643622	0.256424	0.606052	0.322105	0.534965	0.25622	0.489278	0.154589
135	ACSF3_Y466	ACSF3	Y466	FKDGQYWIRGR	1	0.500811	0.111414	0.448412	0.0758564	0.613902	0.167574	0.491059	0.114962	0.671118	0.323245	0.779899	0.190926	0.386793	0.0852294	0.862219	0.229137	0.360834	0.123493	0.48163	0.0679114	0.316936	0.0682512	0.368678	0.0614178	0.378864	0.102818
136	ACSF3_Y466_K462T	ACSF3	Y466	FTDGQYWIRGR	1	0.588443	0.133568	0.421849	0.0719594	1.03122	0.190095	0.61067	0.145383	0.818015	0.340064	1.01635	0.223343	0.407928	0.089083	0.992285	0.328008	0.424503	0.100357	0.554858	0.114395	0.508899	0.069913	0.462967	0.137702	0.520775	0.147711
137	ACSF3_Y466_R471Q	ACSF3	Y466	FKDGQYWIRGQ	1	0.425989	0.0513431	0.476668	0.197914	0.915018	0.579134	0.432988	0.125198	0.50677	0.121218	0.831421	0.153824	0.319857	0.184192	0.875527	0.285272	0.597674	0.261117	0.663259	0.210409	0.522294	0.240195	0.597999	0.324233	0.384805	0.111019
138	ACSF3_Y466_R471W	ACSF3	Y466	FKDGQYWIRGW	1	0.534175	0.0571111	0.513251	0.241215	0.798528	0.443763	0.635661	0.365045	0.926885	0.171972	0.998055	0.129033	0.371623	0.0361062	1.13439	0.239954	0.609003	0.221756	0.551033	0.164062	0.624414	0.244562	0.624025	0.367365	0.345337	0.146273
139	ACSM1_Y477	ACSM1	Y477	INASGYRIGPA	1	0.43308	0.134228	0.328494	0.122464	0.38469	0.0294665	0.359776	0.0892574	0.401327	0.062744	0.478823	0.102396	0.4668	0.280081	0.50232	0.0959248	0.348934	0.118971	0.366609	0.0869475	0.370729	0.151833	0.373979	0.153484	0.330496	0.050492
140	ACSM1_Y477_I479V	ACSM1	Y477	INASGYRVGPA	1	0.510324	0.0612241	0.411026	0.058999	0.642859	0.308413	0.615044	0.13412	0.523232	0.0336228	0.65244	0.0417174	0.563186	0.107508	0.901107	0.654016	0.594696	0.102547	0.629369	0.16811	0.563989	0.272895	0.485133	0.314933	0.490418	0.153946
141	ACTA1_Y145	ACTA1	Y145	AVLSLYASGRT	1	0.460548	0.0389601	0.489171	0.135021	0.702236	0.221256	0.812931	0.207707	1.03656	0.119248	1.02413	0.0836561	0.503173	0.0975197	1.1962	0.0621956	0.523486	0.104629	0.699272	0.211982	0.621626	0.136536	0.571067	0.213624	0.413106	0.032868
142	ACTA1_Y145_A140P	ACTA1	Y145	PVLSLYASGRT	1	0.573229	0.145248	0.615962	0.290355	0.768313	0.288187	1.30612	0.320436	1.39071	0.148301	1.13882	0.393117	0.538599	0.30377	1.18761	0.342671	0.328024	0.149244	0.702753	0.468699	0.637391	0.200503	0.547677	0.241625	0.751692	0.371531
143	ACTA1_Y145_G148D	ACTA1	Y145	AVLSLYASDRT	1	0.465296	0.150055	0.636735	0.249028	0.538159	0.270632	0.893251	0.251486	0.884249	0.10694	0.966553	0.155155	0.515385	0.0503043	1.13843	0.132548	0.475829	0.0482123	0.666444	0.173821	0.66157	0.171421	0.663991	0.236273	0.446034	0.111631
144	ACTA1_Y145_L142P	ACTA1	Y145	AVPSLYASGRT	1	0.45072	0.0362677	0.392629	0.152692	1.73617	0.645089	0.537822	0.0917134	0.523493	0.0741662	0.650423	0.105126	0.45091	0.0798838	0.569557	0.0908154	0.405117	0.0919745	0.433552	0.0697058	0.451647	0.0583034	0.432879	0.0798964	0.472903	0.0522488
145	ACTA1_Y145_T150N	ACTA1	Y145	AVLSLYASGRN	1	0.418986	0.0383897	0.440486	0.156799	0.687558	0.28574	0.737249	0.128269	0.957995	0.187071	0.857705	0.104045	0.548884	0.148509	0.989362	0.0973452	0.436407	0.0798989	0.580973	0.201202	0.519016	0.0964475	0.556789	0.22549	0.388091	0.0636871
146	ACTA1_Y168	ACTA1	Y168	HNVPIYEGYAL	2	12.6184	2.92778	16.8685	7.71605	15.1449	8.23533	13.1578	6.79377	1.05813	0.198388	1.55644	0.3424	24.6865	6.36935	5.29991	2.08544	0.792069	0.132341	0.616482	0.115196	26.0063	8.91635	35.1221	13.4796	13.0814	1.46175
147	ACTA1_Y168_A172G	ACTA1	Y168	HNVPIYEGYGL	2	11.4946	1.99068	19.9928	4.51708	17.3845	2.82364	3.22798	1.84317	0.805267	0.451894	1.52047	0.499615	27.869	8.29411	5.48165	5.16681	0.665512	0.481615	0.941026	0.481344	31.7905	7.66066	41.9016	10.6538	10.8956	2.11462
148	ACTA1_Y168_A172G_YF	ACTA1	Y168	HNVPIYEGFGL	1	8.62124	2.18507	14.9454	4.35996	13.5408	7.16858	7.97169	3.45146	0.575493	0.270491	1.35539	0.355986	18.8471	4.0582	4.30479	2.38703	0.506612	0.191222	0.519418	0.17352	24.24	6.04486	27.5723	6.95334	12.141	2.31393
149	ACTA1_Y168_V165L	ACTA1	Y168	HNLPIYEGYAL	2	6.96602	1.1668	11.5557	2.88865	9.09013	1.81929	2.79239	2.29641	0.565751	0.193362	1.24063	0.487295	19.3135	5.57835	1.16193	0.344006	0.547445	0.224681	0.639871	0.207102	16.9609	1.78338	22.7339	4.96811	6.51083	1.18227
150	ACTA1_Y168_V165L_YF	ACTA1	Y168	HNLPIYEGFAL	1	9.43609	1.89337	14.0843	4.72228	12.7623	6.74425	14	7.6209	0.99612	0.0990876	1.86172	0.502826	21.9272	5.54099	2.80367	0.713556	0.677306	0.0571321	1.1336	0.796528	17.5032	1.50141	24.3015	7.75134	12.5812	2.04479
151	ACTA1_Y168_V165M	ACTA1	Y168	HNMPIYEGYAL	2	10.4427	2.26684	13.0648	7.57975	13.4993	10.6282	11.327	6.49418	0.830596	0.202804	1.30195	0.607273	17.4357	5.42557	2.64026	0.696065	0.464988	0.155225	0.653512	0.101624	19.7449	9.57379	25.5471	13.8986	10.9747	3.15294
152	ACTA1_Y168_V165M_YF	ACTA1	Y168	HNMPIYEGFAL	1	13.2302	2.60065	21.5235	14.3138	15.594	9.64424	29.1516	10.3275	0.859181	0.559487	1.43687	0.382951	26.7388	3.9315	5.33732	1.63046	0.703719	0.345052	0.786074	0.278101	24.3368	7.01413	32.8509	15.9159	14.7254	2.41381
153	ACTA1_Y168_YF	ACTA1	Y168	HNVPIYEGFAL	1	10.575	2.16101	15.1286	6.6295	14.0992	8.49266	23.4704	6.01873	0.893919	0.0999525	1.58898	0.259011	22.7152	6.69999	7.74293	2.06918	0.64931	0.208575	0.784875	0.182463	22.5306	5.71671	28.1179	10.1232	12.4094	1.63174
154	ACTA1_Y171	ACTA1	Y171	PIYEGYALPHA	2	14.8218	2.88007	19.7567	11.8153	17.2667	11.7814	31.3057	9.55428	1.39453	0.548206	2.11136	0.814954	26.235	9.67576	3.39672	1.28545	1.0124	0.355817	0.995253	0.141732	27.2046	11.9391	35.7094	17.0117	18.1165	4.70044
155	ACTA1_Y171_A172G	ACTA1	Y171	PIYEGYGLPHA	2	13.7681	3.81093	17.53	8.86501	16.9283	8.69837	12.7064	7.70957	0.833404	0.114601	1.32472	0.689458	20.9287	3.74306	2.45143	1.03713	0.555217	0.534715	0.944555	0.376923	31.048	10.4957	33.4697	11.9689	18.2846	2.22946
156	ACTA1_Y171_A172G_YF	ACTA1	Y171	PIFEGYGLPHA	1	0.546676	0.11157	0.701042	0.206841	0.641518	0.346802	0.872469	0.266556	0.835868	0.170337	0.806288	0.154445	0.744346	0.391139	0.866097	0.332893	0.627968	0.201953	0.450719	0.269075	0.469328	0.0500066	0.500376	0.247547	0.641372	0.139838
157	ACTA1_Y171_YF	ACTA1	Y171	PIFEGYALPHA	1	0.562051	0.0546989	0.536173	0.0618735	0.541417	0.150098	2.43979	0.592972	0.716753	0.199166	0.819578	0.0789214	0.489774	0.136133	0.778264	0.181734	0.53565	0.124347	0.665472	0.186274	0.546033	0.0670666	0.574074	0.196689	0.80669	0.0956871
158	ACTA1_Y190	ACTA1	Y190	RDLTDYLMKIL	1	0.613248	0.0726908	0.554214	0.100686	0.550982	0.149864	0.790572	0.224404	1.15603	0.255254	1.08835	0.319437	0.580536	0.249481	1.21026	0.30167	0.539315	0.247963	0.895888	0.337042	0.579567	0.129329	0.529344	0.185156	0.477238	0.0848831
159	ACTA1_Y190_R185C	ACTA1	Y190	CDLTDYLMKIL	1	0.394047	0.0933041	0.478188	0.224039	0.587335	0.398204	0.829743	0.225113	1.12688	0.210815	1.39304	0.263455	0.54117	0.190088	1.696	0.707056	0.476119	0.076081	1.01924	0.395233	0.790803	0.327542	0.750463	0.500819	0.416053	0.116782
160	ACTA1_Y190_R185D	ACTA1	Y190	DDLTDYLMKIL	1	0.547673	0.0871277	0.444335	0.0855424	0.518813	0.122521	0.757996	0.158669	1.14658	0.450825	1.21644	0.30544	0.457338	0.0702908	1.09999	0.13966	0.516266	0.0468129	0.669356	0.0858644	0.476147	0.0635671	0.552627	0.255444	0.529186	0.138983
161	ACTA1_Y190_R185G	ACTA1	Y190	GDLTDYLMKIL	1	0.323204	0.0674716	0.397278	0.197628	0.452505	0.101694	0.5603	0.144229	0.647692	0.174538	0.788139	0.216546	0.419985	0.0661678	0.821464	0.180459	0.437461	0.151181	0.508726	0.0959067	0.507829	0.158328	0.475821	0.197858	0.355082	0.15598
162	ACTA1_Y190_R185S	ACTA1	Y190	SDLTDYLMKIL	1	0.507056	0.103576	0.53544	0.161626	0.570815	0.156221	0.789071	0.171349	1.09698	0.413128	1.14269	0.132127	0.582249	0.176834	1.22082	0.248498	0.532005	0.0514037	0.732491	0.125273	0.578246	0.270075	0.647921	0.246992	0.445105	0.0844956
163	ACTA1_Y200	ACTA1	Y200	LTERGYSFVTT	1	0.656858	0.156016	0.581934	0.282064	0.707913	0.200726	0.940592	0.130571	1.10309	0.128316	1.40107	0.269755	0.823327	0.119078	1.40652	0.269164	0.926938	0.243494	1.16906	0.400741	0.795877	0.360563	0.950443	0.511188	0.769136	0.170741
164	ACTA1_Y200_E197D	ACTA1	Y200	LTDRGYSFVTT	1	0.600443	0.115886	0.799832	0.127197	0.676955	0.0903178	1.17159	0.186989	1.88051	1.36281	1.38061	0.730016	0.652694	0.442033	1.22598	0.189828	0.771789	0.360139	0.756064	0.327248	0.852314	0.375726	1.04145	0.416078	0.845544	0.41568
165	ACTA1_Y200_G199S	ACTA1	Y200	LTERSYSFVTT	1	0.855861	0.195652	0.622246	0.31701	1.04309	0.723872	0.888615	0.112431	1.02772	0.391233	0.951036	0.367136	2.91868	0.809588	1.2443	0.282017	0.972921	0.296021	0.718043	0.191277	0.543274	0.309541	0.984354	0.583181	2.5621	0.57866
166	ACTA1_Y200_R198L	ACTA1	Y200	LTELGYSFVTT	1	1.11361	0.321432	1.88417	1.07196	1.89488	0.976844	1.51338	1.0363	1.9307	0.759991	3.1384	0.94528	2.05072	1.64622	3.61437	1.51687	5.03509	3.5347	3.42456	1.08813	1.44194	0.703579	1.46113	0.940837	1.11777	0.468506
167	ACTA1_Y220	ACTA1	Y220	KEKLCYVALDF	1	1.81095	0.40546	1.03412	0.346696	1.266	0.433625	0.877364	0.132161	2.68311	0.458637	1.25595	0.257095	1.29461	0.390759	1.16882	0.125932	2.40059	0.651161	2.1446	1.00413	0.737373	0.163929	0.676401	0.162396	4.72052	0.397812
168	ACTA1_Y220_L223P	ACTA1	Y220	KEKLCYVAPDF	1	0.580842	0.159831	0.424281	0.0493767	0.48853	0.0924626	5.43468	2.52733	1.17566	0.476543	1.40363	0.416271	0.419116	0.0667337	0.836295	0.193075	0.634634	0.102508	0.603131	0.073223	0.558062	0.0918635	0.636833	0.11391	0.656425	0.135884
169	ACTA1_Y242	ACTA1	Y242	SLEKSYELPDG	1	0.478954	0.0463173	0.490085	0.14952	0.534364	0.193221	0.712374	0.223163	0.913267	0.0839472	1.05582	0.116106	0.53769	0.087274	1.14879	0.186946	0.544375	0.104028	0.707018	0.148781	0.61374	0.133486	0.53065	0.207659	0.467357	0.0430366
170	ACTA1_Y242_E243K	ACTA1	Y242	SLEKSYKLPDG	1	0.409723	0.013607	0.397397	0.0509222	0.392544	0.0526043	0.573954	0.137486	0.648607	0.047194	0.657507	0.0942868	0.42933	0.0330584	0.756786	0.105199	0.467069	0.137649	0.454958	0.0736372	0.408207	0.14277	0.433618	0.11055	0.462267	0.0647441
171	ACTA1_Y281	ACTA1	Y281	IHETTYNSIMK	1	1.045	0.119021	0.746039	0.192355	1.37939	0.760754	0.571532	0.156195	0.477311	0.0762408	0.475448	0.0794652	0.414343	0.0697289	0.711158	0.269441	0.384298	0.0662341	0.435649	0.129109	0.33247	0.130706	0.338051	0.086609	0.300101	0.0494288
172	ACTA1_Y281_M285K	ACTA1	Y281	IHETTYNSIKK	1	0.441943	0.0920398	0.390576	0.108635	0.689896	0.307855	0.4551	0.119482	0.531687	0.0849782	0.449356	0.0814313	0.350006	0.0667186	0.688668	0.190644	0.466772	0.127064	0.482092	0.160382	0.381537	0.103511	0.403122	0.169869	0.369096	0.0954677
173	ACTA1_Y281_N282K	ACTA1	Y281	IHETTYKSIMK	1	0.38364	0.0652922	0.309317	0.138318	0.358951	0.0816624	0.458302	0.197722	0.692022	0.06142	0.364003	0.0817772	0.371896	0.187549	0.582786	0.183406	0.372958	0.121991	0.472336	0.202546	0.324403	0.0898293	0.329587	0.166979	0.330744	0.134535
174	ACTA1_Y281_Y281H	ACTA1	Y281	IHETTHNSIMK	0	0.262142	0.0371902	0.429669	0.0972037	0.463464	0.153481	0.400701	0.0443167	0.470846	0.028918	0.452189	0.110874	0.347061	0.0532463	0.468537	0.189198	0.424748	0.0775422	0.390472	0.131664	0.304497	0.0824386	0.349175	0.116586	0.379602	0.103806
175	ACTA1_Y296	ACTA1	Y296	IRKDLYANNVM	1	0.41928	0.0888312	0.488305	0.218119	0.571946	0.29012	0.575686	0.152936	0.772344	0.0723493	0.558639	0.089022	0.436492	0.113707	0.862934	0.121044	0.447424	0.0363624	0.588077	0.110459	0.604623	0.195601	0.526534	0.174053	0.413165	0.0904199
176	ACTA1_Y296_D294V	ACTA1	Y296	IRKVLYANNVM	1	0.325441	0.0681007	0.285731	0.0785419	0.296795	0.0656301	0.529161	0.0853691	0.637326	0.120181	0.569285	0.0583643	0.337128	0.119544	0.598699	0.10768	0.5668	0.474432	0.3951	0.130892	0.311311	0.0473944	0.367596	0.176349	0.327971	0.132216
177	ACTA1_Y364	ACTA1	Y364	ITKQEYDEAGP	1	0.421697	0.101362	0.563076	0.159222	0.509733	0.161351	0.678946	0.124597	0.881002	0.0835494	1.13905	0.165637	0.494458	0.101108	1.0806	0.130569	0.475327	0.0399432	0.688762	0.198069	0.553311	0.158766	0.487953	0.14417	0.42277	0.0846234
178	ACTA1_Y364_I359L	ACTA1	Y364	LTKQEYDEAGP	1	0.995895	0.251458	0.809196	0.376276	1.14581	0.69413	1.38805	0.652924	1.61887	0.0658928	2.03001	1.15705	0.638322	0.175048	1.70718	0.381594	0.81095	0.470539	1.06708	0.32415	0.69569	0.500257	1.22941	0.850382	0.816822	0.255373
179	ACTA1_Y71	ACTA1	Y71	ILTLKYPIEHG	1	0.375709	0.043727	0.436779	0.107278	0.453209	0.15409	0.570199	0.040069	0.583644	0.199751	0.71622	0.070705	0.391333	0.0925225	0.779662	0.118626	0.46976	0.0591351	0.591938	0.139646	0.476294	0.128989	0.484735	0.111547	0.391364	0.0439802
180	ACTA1_Y71_E74K	ACTA1	Y71	ILTLKYPIKHG	1	0.340995	0.0751224	0.431229	0.113774	0.348737	0.0296359	0.367059	0.0878964	0.558435	0.131192	0.52298	0.212366	0.412847	0.121329	0.588387	0.0687983	0.44869	0.103517	0.497287	0.1194	0.426146	0.0963575	0.518309	0.165337	0.343548	0.0466302
181	ACTA1_Y71_H75L	ACTA1	Y71	ILTLKYPIELG	1	0.352177	0.0328609	0.435017	0.333203	0.518465	0.173175	0.475939	0.125322	0.739582	0.239115	0.885685	0.142301	0.456521	0.117191	0.986106	0.277732	0.470478	0.127464	0.600515	0.170698	0.578161	0.15627	0.571945	0.261687	0.351632	0.0688091
182	ACTA1_Y71_H75R	ACTA1	Y71	ILTLKYPIERG	1	0.478594	0.0573713	0.55449	0.0917571	0.489765	0.0442663	0.580715	0.0913455	0.675454	0.151658	0.66915	0.0914868	0.407176	0.112072	0.812321	0.195971	0.571644	0.0994438	0.654974	0.195693	0.541665	0.151386	0.662511	0.436821	0.441564	0.125979
183	ACTA1_Y71_I66N	ACTA1	Y71	NLTLKYPIEHG	1	0.416504	0.0422509	0.469896	0.0994281	0.445743	0.119192	0.71713	0.122575	0.669486	0.15994	0.767222	0.244336	0.375175	0.0869011	0.9298	0.183598	0.598444	0.13444	0.54856	0.159807	0.492986	0.201363	0.541247	0.220608	0.406845	0.0734991
184	ACTA1_Y71_T68I	ACTA1	Y71	ILILKYPIEHG	1	0.491184	0.0659306	0.389535	0.186719	0.487931	0.134333	0.817564	0.237148	1.11452	0.179237	1.07492	0.370412	0.693918	0.404582	1.28592	0.206282	0.52511	0.16058	0.806866	0.464216	0.612194	0.197115	0.479101	0.186734	0.423519	0.158249
185	ACTA1_Y93	ACTA1	Y93	WHHTFYNELRV	1	0.545884	0.0503835	0.501604	0.120187	0.997403	0.277981	0.657311	0.112955	0.783493	0.132056	0.875497	0.077232	0.5401	0.0601813	1.01048	0.15049	0.552061	0.112713	0.644756	0.0668322	0.558225	0.159054	0.483478	0.112639	0.586883	0.0670738
186	ACTA1_Y93_L96P	ACTA1	Y93	WHHTFYNEPRV	1	0.508411	0.0735118	0.429448	0.167621	0.55158	0.213433	0.708753	0.15847	0.794369	0.124278	0.964802	0.146989	0.582004	0.136436	1.02819	0.10002	0.521589	0.104619	0.560927	0.172667	0.572543	0.154234	0.496636	0.151318	0.58952	0.136832
187	ACTA2_Y145_R149C	ACTA2	Y145	AVLSLYASGCT	1	0.459883	0.186211	0.538072	0.171918	0.634052	0.287549	0.964767	0.32323	1.19501	0.176863	1.19828	0.136534	0.575768	0.0684841	1.3931	0.26125	0.511998	0.139148	0.810644	0.342775	0.825385	0.273591	0.658178	0.203388	0.43212	0.0557558
188	ACTA2_Y145_Y145C	ACTA2	Y145	AVLSLCASGRT	0	0.356947	0.0250842	0.366321	0.14305	0.448389	0.194101	0.606198	0.14728	0.958539	0.259469	0.898441	0.156653	0.544588	0.357785	0.954937	0.329673	0.504897	0.174344	0.592183	0.137217	0.579539	0.272179	0.639473	0.393107	0.40229	0.123961
189	ACTA2_Y190_R185Q	ACTA2	Y190	QDLTDYLMKIL	1	0.545971	0.127249	0.656983	0.289179	0.915793	0.206316	1.12827	0.519421	1.34547	0.80258	1.01193	0.515381	0.558207	0.353813	1.55117	0.240385	0.806567	0.232595	0.697779	0.428144	0.522567	0.300395	0.772393	0.355753	0.808891	0.258436
190	ACTA2_Y200_T196S	ACTA2	Y200	LSERGYSFVTT	1	0.693259	0.243915	0.809513	0.563317	0.72423	0.563069	0.925364	0.297354	1.07981	0.659411	1.28944	0.464638	1.05822	0.265214	1.41138	0.261296	0.954789	0.25084	1.46197	1.0698	0.940458	0.403957	0.704433	0.0293576	0.986497	0.130709
191	ACTA2_Y296	ACTA2	Y296	IRKDLYANNVL	1	0.428871	0.036574	0.412646	0.054892	0.449683	0.0729616	0.581307	0.221444	0.539711	0.0500974	0.526706	0.0652233	0.422056	0.0884608	0.590474	0.037378	0.420713	0.0555075	0.564379	0.172244	0.38017	0.039573	0.460223	0.14262	0.475708	0.117535
192	ACTA2_Y296_R292G	ACTA2	Y296	IGKDLYANNVL	1	0.549598	0.116625	0.525774	0.100181	0.775107	0.358516	0.770067	0.213638	1.03307	0.275725	1.19796	0.651736	0.619383	0.211809	1.15175	0.234079	0.450268	0.117249	0.640072	0.227299	0.679114	0.294846	0.633792	0.226334	0.556355	0.195982
193	ACTB_Y188_R183W	ACTB	Y188	WDLTDYLMKIL	1	0.48747	0.0767731	0.519041	0.158682	0.610752	0.129277	0.894055	0.239629	1.22558	0.574989	1.25007	0.292635	0.529465	0.0872596	1.31617	0.264403	0.539082	0.083257	0.776567	0.221628	0.556089	0.0935412	0.548248	0.153359	0.476563	0.136054
194	ACTB_Y198	ACTB	Y198	LTERGYSFTTT	1	0.46015	0.0797905	0.456224	0.224112	0.43173	0.0903615	0.586401	0.106393	0.756155	0.0248635	0.83737	0.147626	0.55439	0.152855	0.75824	0.140403	0.50361	0.164493	0.779658	0.623971	0.472248	0.148181	0.491857	0.227089	0.408018	0.0948562
195	ACTB_Y198_R196C	ACTB	Y198	LTECGYSFTTT	1	0.670866	0.259809	0.581888	0.317692	0.554664	0.150004	0.708196	0.288486	0.888501	0.0961095	1.09093	0.174664	0.733165	0.113302	1.15362	0.236966	0.674214	0.302222	0.754378	0.214481	0.592153	0.269732	0.780806	0.177329	0.416535	0.0947061
196	ACTB_Y198_R196H	ACTB	Y198	LTEHGYSFTTT	1	1.08674	0.217699	0.967941	0.461083	0.341757	0.297476	1.58512	0.851143	1.6126	0.463297	2.10957	0.940215	0.814513	0.188074	1.78804	0.485159	0.961101	0.517371	1.08906	0.554297	0.862123	0.979005	0.532567	0.257469	0.938312	0.371153
197	ACTB_Y240_P243L	ACTB	Y240	SLEKSYELLDG	1	0.52033	0.093717	0.532808	0.0988221	0.594542	0.110534	0.956349	0.333384	1.24943	0.328651	1.15883	0.21781	0.705301	0.299991	1.16429	0.228409	0.508443	0.0966258	0.963487	0.529056	0.574573	0.0824119	0.583852	0.207666	0.555354	0.105663
198	ACTB_Y69_L65V	ACTB	Y69	IVTLKYPIEHG	1	0.422122	0.102951	0.483088	0.177291	0.465886	0.132268	0.871132	0.564346	0.73999	0.0731359	0.698226	0.104763	0.488783	0.137001	0.760246	0.130953	0.522515	0.0473699	0.702286	0.301166	0.43356	0.085035	0.412471	0.0307094	0.480833	0.0842392
199	ACTC1_Y168_P166A	ACTC1	Y168	HNVAIYEGYAL	2	17.0552	3.09671	15.353	10.0624	12.8273	7.51094	3.44256	1.41204	2.17482	0.403029	2.26182	1.14429	19.679	7.2802	2.50261	1.01035	0.878359	0.487769	0.969376	0.718873	15.8138	8.20849	22.6148	13.9113	6.65298	1.78521
200	ACTC1_Y168_P166A_YF	ACTC1	Y168	HNVAIYEGFAL	1	9.03404	1.86532	13.3417	5.77432	9.94551	4.3727	9.06152	3.64807	0.97153	0.117486	1.28183	0.26131	17.0202	1.07375	1.3049	0.314496	0.559513	0.23344	0.780857	0.415978	11.0624	2.53301	11.2372	3.50434	8.57176	0.671185
201	ACTC1_Y168_Y168C	ACTC1	Y168	HNVPICEGYAL	1	0.66755	0.467203	0.4341	0.236595	0.915543	0.776592	0.651578	0.36688	0.895178	0.0958842	0.860068	0.112476	0.498695	0.157586	1.00435	0.302216	0.732327	0.3635	0.841024	0.396657	0.80063	0.612378	0.512742	0.29633	0.505179	0.108034
202	ACTC1_Y168_Y168C_YF	ACTC1	Y168	HNVPICEGFAL	0	0.621034	0.107352	0.749862	0.257268	0.708098	0.384868	1.05931	0.354729	1.14661	0.233337	1.10069	0.417582	0.589632	0.245388	1.29141	0.30233	0.849153	0.288154	0.947257	0.487371	0.729311	0.146964	0.704211	0.232794	0.673416	0.151397
203	ACTC1_Y171_P166A	ACTC1	Y171	AIYEGYALPHA	2	11.3083	2.25425	15.946	7.01672	13.7404	7.33018	18.0688	8.15473	0.788768	0.0704474	1.77092	0.832164	22.577	4.15377	1.36693	0.463779	0.761237	0.180522	0.772547	0.129481	20.7859	6.24451	30.0877	11.1002	13.7838	1.94644
204	ACTC1_Y171_P166A_YF	ACTC1	Y171	AIFEGYALPHA	1	0.414167	0.0776853	0.472183	0.115967	0.430174	0.0769733	1.20297	0.333475	0.539111	0.105483	0.732302	0.177116	0.604505	0.10012	0.800875	0.347562	0.548673	0.199192	0.535177	0.122829	0.452195	0.0865107	0.400948	0.114941	0.725561	0.222717
205	ACTC1_Y171_Y168C	ACTC1	Y171	PICEGYALPHA	1	0.405822	0.124453	0.706629	0.459141	0.534795	0.26016	0.897136	0.656562	0.453158	0.0743285	0.94559	0.4471	0.577131	0.0921109	0.803752	0.291383	0.682439	0.399763	0.597917	0.180419	0.487729	0.07499	0.586895	0.245155	0.445353	0.0776775
206	ACTC1_Y242_S241G	ACTC1	Y242	SLEKGYELPDG	1	0.368146	0.0451977	0.490078	0.236609	0.487582	0.170756	0.600232	0.149215	0.756037	0.184983	0.993882	0.275519	0.435855	0.15529	0.909185	0.0719357	0.43793	0.108134	0.545093	0.0817063	0.475122	0.116771	0.498605	0.133475	0.350272	0.0212034
207	ACTC1_Y296_A297S	ACTC1	Y296	IRKDLYSNNVL	1	0.322278	0.0226517	0.414968	0.0393718	0.418683	0.195199	0.443862	0.0913063	0.471436	0.207423	0.505638	0.203684	0.414102	0.129856	0.553487	0.198706	0.425108	0.136424	0.421778	0.141039	0.497127	0.0696006	0.475519	0.237949	0.51827	0.0596599
208	ACTC1_Y308	ACTC1	Y308	GGTTMYPGIAD	1	0.484168	0.0914303	0.492885	0.0858437	0.43675	0.0866185	0.5606	0.0817104	0.766057	0.267666	0.853928	0.359855	0.407615	0.056961	0.722382	0.117247	0.45082	0.102073	0.576252	0.157762	0.424261	0.106635	0.419446	0.0667717	0.417779	0.0574206
209	ACTC1_Y308_M307L	ACTC1	Y308	GGTTLYPGIAD	1	0.363235	0.0395657	0.458309	0.169961	0.442477	0.134477	0.484144	0.119024	0.552522	0.0707589	0.586914	0.14675	0.430756	0.153117	0.764773	0.127696	0.536731	0.227022	0.548288	0.0787787	0.445784	0.132248	0.530562	0.180986	0.380558	0.0714292
210	ACTC1_Y364	ACTC1	Y364	ISKQEYDEAGP	1	0.598392	0.115273	0.601697	0.197702	0.615953	0.120364	0.789966	0.138445	1.30934	0.426921	1.27854	0.311813	0.627259	0.142462	1.29421	0.201458	0.522259	0.192661	0.818547	0.274363	0.650462	0.129883	0.741044	0.160837	0.517818	0.0452849
211	ACTC1_Y364_E363G	ACTC1	Y364	ISKQGYDEAGP	1	0.540628	0.0239078	0.451825	0.0648919	0.5718	0.162318	0.793015	0.232535	0.930803	0.0776255	0.897252	0.231286	0.506693	0.124185	1.00556	0.197624	0.539005	0.278161	0.567309	0.125155	0.600673	0.131301	0.532298	0.0945679	0.666035	0.262136
212	ACTC1_Y93_H90Y	ACTC1	Y93	WHYTFYNELRV	2	0.619322	0.155024	0.460778	0.145928	0.67017	0.260684	0.979039	0.233047	1.27331	0.0130241	1.39025	0.108785	0.65098	0.112568	1.41728	0.302185	0.685551	0.133552	1.03231	0.317782	1.30676	0.191458	0.677502	0.257998	0.869393	0.153077
213	ACTC1_Y93_H90Y_YF	ACTC1	Y93	WHFTFYNELRV	1	0.41961	0.146507	0.413209	0.257787	0.634614	0.251333	1.27384	0.96958	1.19584	0.0858213	1.41695	0.215222	0.577952	0.0917833	1.49997	0.166311	0.542021	0.18719	1.07515	0.385622	0.783803	0.274896	0.670668	0.255045	0.391892	0.104448
214	ACTC1_Y93_R97C	ACTC1	Y93	WHHTFYNELCV	1	0.730452	0.065469	0.574113	0.232207	1.17969	0.367557	0.761268	0.207388	1.03008	0.16905	1.19343	0.124799	1.03771	0.148697	1.23414	0.154752	0.881427	0.187569	0.979144	0.391923	0.793051	0.120537	0.65798	0.194763	0.904964	0.040258
215	ACTG1_Y188_D187H	ACTG1	Y188	RDLTHYLMKIL	1	0.462979	0.103367	0.756315	0.555587	1.06106	0.376977	0.692323	0.333452	0.477284	0.163432	1.27324	0.452388	0.639986	0.375391	1.11647	0.485688	0.664721	0.248534	0.850005	0.241882	1.04596	0.658666	0.804135	0.522144	0.583179	0.28709
216	ACTG1_Y198_T203K	ACTG1	Y198	LTERGYSFTTK	1	0.981577	0.484318	1.66192	0.868845	0.910695	0.425616	0.995202	0.311556	1.65119	0.527016	3.00297	3.29	2.10194	0.985172	2.10545	0.918741	1.95527	0.922998	1.53701	0.541075	1.79623	1.73323	2.03235	1.57962	1.78644	0.509903
217	ACTG1_Y69_P70L	ACTG1	Y69	ILTLKYLIEHG	1	0.483241	0.0700356	0.525792	0.256475	0.557232	0.256045	0.840388	0.0959199	1.07806	0.0383191	1.04937	0.0975737	0.561996	0.12884	1.32392	0.158947	0.466407	0.0736886	0.839466	0.324233	0.688929	0.107901	0.617892	0.174474	0.463042	0.122109
218	ACTG1_Y91_T89I	ACTG1	Y91	WHHIFYNELRV	1	0.406626	0.132797	0.387562	0.168468	0.568526	0.187954	0.805332	0.212309	1.12707	0.0597599	1.14011	0.0300129	0.536273	0.0657037	1.32995	0.116497	0.52702	0.0780795	0.910966	0.369667	0.662544	0.12128	0.724571	0.227263	0.444446	0.060591
219	ACTG2_Y144_R148S	ACTG2	Y144	AVLSLYASGST	1	0.54136	0.089124	0.476055	0.245798	0.638202	0.258654	0.829147	0.152963	1.09238	0.169141	1.08431	0.114644	0.558292	0.167432	1.26139	0.209202	0.571651	0.171649	0.723004	0.196017	0.728897	0.244972	0.72229	0.222077	0.41354	0.0771552
220	ACTG2_Y199_G198D	ACTG2	Y199	LTERDYSFVTT	1	0.976677	0.386282	1.93418	1.59055	1.62194	1.02775	0.887897	0.381669	1.27406	0.280994	2.55937	1.62798	2.81865	0.841195	1.60442	1.3253	7.67487	5.74637	4.73909	4.31413	2.3771	1.40861	3.50866	3.77571	1.26522	0.916018
221	ACTL6A_Y69	ACTL6A	Y69	GGPTYYIDTNA	2	0.778467	0.148088	0.925843	0.467647	0.898677	0.794555	0.554808	0.110796	0.727173	0.152098	0.884722	0.283622	0.407048	0.130795	0.893199	0.135178	1.09241	0.414821	0.962507	0.277588	0.698199	0.303929	0.514433	0.148721	1.08457	0.236377
222	ACTL6A_Y69_P66S	ACTL6A	Y69	GGSTYYIDTNA	2	0.80458	0.136237	0.955146	0.373185	0.602345	0.209979	0.654253	0.134168	0.66831	0.0579771	0.882042	0.26213	0.452879	0.0866544	0.997614	0.371004	0.724034	0.156547	0.718624	0.199593	0.563002	0.163936	0.55463	0.280326	1.00677	0.175008
223	ACTL6A_Y69_P66S_YF	ACTL6A	Y69	GGSTFYIDTNA	1	0.390437	0.052076	0.400469	0.149288	0.461344	0.142337	0.734409	0.371592	1.01006	0.243745	0.92256	0.0749096	0.475307	0.0905797	0.986615	0.145372	0.528358	0.120826	0.65056	0.183326	0.522847	0.167559	0.480383	0.142844	0.476592	0.117029
224	ACTL6A_Y69_YF	ACTL6A	Y69	GGPTFYIDTNA	1	0.4394	0.107338	0.458405	0.173405	0.529759	0.170321	0.774564	0.194533	1.12689	0.150792	1.23536	0.055024	0.529231	0.134226	1.39107	0.144362	0.542345	0.156185	0.868098	0.311709	0.706602	0.260813	0.625907	0.215183	0.409585	0.110444
225	ACTN1_Y193	ACTN1	Y193	PELIDYGKLRK	1	0.404224	0.0655995	0.587054	0.293305	0.446063	0.169371	0.537374	0.159958	0.367762	0.179131	0.85984	0.513062	0.465115	0.175604	0.800035	0.412653	0.713842	0.371516	0.543748	0.207839	0.440888	0.216164	0.66794	0.338369	0.62007	0.150117
226	ACTN1_Y193_R197W	ACTN1	Y193	PELIDYGKLWK	1	0.590455	0.184562	0.600707	0.378579	0.392766	0.205293	0.912257	0.0782683	0.760774	0.258629	1.30868	0.550709	0.530967	0.132608	1.2622	0.397824	0.534574	0.232148	0.765728	0.240911	0.717628	0.184041	0.683333	0.392821	0.521591	0.158724
227	ACTN1_Y708	ACTN1	Y708	NKHTNYTMEHI	1	0.381246	0.12478	0.388202	0.100663	0.38372	0.0585327	0.351953	0.0924527	0.421411	0.0363128	0.508856	0.169042	0.359782	0.0753298	0.548515	0.068438	0.404047	0.0635886	0.296058	0.119528	0.350471	0.0502346	0.401121	0.144671	0.358476	0.118061
228	ACTN1_Y708_N707T	ACTN1	Y708	NKHTTYTMEHI	1	0.450319	0.0470274	0.419478	0.0969504	0.450639	0.0877776	0.514362	0.138708	0.447098	0.0579741	0.526915	0.0823603	0.396637	0.065894	0.57506	0.117836	0.394646	0.0398799	0.445215	0.0613877	0.393503	0.0631685	0.399789	0.087707	0.434103	0.114995
229	ACTN2_Y599	ACTN2	Y599	SSSNPYSTVTM	1	1.90282	0.29783	0.975724	0.33825	0.995388	0.284542	0.768361	0.200895	0.599108	0.0575929	0.620327	0.0746938	10.8554	1.20054	0.750999	0.143537	0.542549	0.201837	0.48558	0.0525771	0.460989	0.107871	0.38915	0.104713	0.52093	0.0146255
230	ACTN2_Y599_M604V	ACTN2	Y599	SSSNPYSTVTV	1	1.28663	0.311623	0.732569	0.31559	0.820415	0.401528	0.567472	0.0130986	0.382989	0.0923729	0.431754	0.0640546	9.71032	1.34099	0.596593	0.124136	0.745389	0.494705	0.482935	0.132905	0.342307	0.0774976	0.358886	0.0620121	0.463966	0.0620631
231	ACTN4_Y260	ACTN4	Y260	KAIMTYVSSFY	2	0.612415	0.0835041	0.536248	0.169843	0.554175	0.20362	0.754928	0.226127	1.03706	0.180792	0.976232	0.144882	0.504912	0.0386019	1.05544	0.0672015	0.488877	0.099753	0.719108	0.19506	0.644458	0.0895549	0.66559	0.233509	0.423696	0.0401307
232	ACTN4_Y260_K255E	ACTN4	Y260	EAIMTYVSSFY	2	0.855143	0.154025	0.502939	0.186918	0.631402	0.251947	0.708372	0.129059	1.06467	0.142822	1.14275	0.234041	0.44506	0.0520903	1.12438	0.187377	0.459309	0.0515698	0.692611	0.188368	0.616856	0.0958196	0.631414	0.100188	0.457234	0.0188733
233	ACTN4_Y260_K255E_YF	ACTN4	Y260	EAIMTYVSSFF	1	0.974718	0.166327	0.777745	0.235686	0.642744	0.299405	0.841562	0.582815	0.899802	0.351716	1.02031	0.191597	0.468352	0.0580142	1.04374	0.133219	0.500995	0.091771	0.675188	0.160799	0.620801	0.176687	0.725821	0.271665	0.422192	0.0909952
234	ACTN4_Y260_S262F	ACTN4	Y260	KAIMTYVFSFY	2	0.507236	0.0881091	0.437726	0.204255	0.464392	0.171423	0.965953	0.279844	1.06103	0.0575125	1.19074	0.233503	0.540346	0.0942091	1.26978	0.287833	0.559274	0.145321	0.793973	0.196237	0.629576	0.195716	0.592466	0.179212	0.435601	0.0362195
235	ACTN4_Y260_S262F_YF	ACTN4	Y260	KAIMTYVFSFF	1	0.425455	0.0673194	0.464009	0.257171	0.501671	0.159474	0.526424	0.12034	0.69836	0.1634	0.988513	0.163088	0.454355	0.204455	0.944532	0.293695	0.443298	0.163999	0.724854	0.178177	0.55306	0.212807	0.460857	0.0813525	0.431001	0.114776
236	ACTN4_Y260_S262P	ACTN4	Y260	KAIMTYVPSFY	2	0.47207	0.0963917	0.520397	0.1045	0.425001	0.13662	0.803085	0.715001	0.638578	0.150454	0.670362	0.260047	0.415435	0.063869	0.64587	0.198128	0.378375	0.0682661	0.508976	0.12753	0.412985	0.0860759	0.630336	0.223455	0.438682	0.100324
237	ACTN4_Y260_S262P_YF	ACTN4	Y260	KAIMTYVPSFF	1	0.460427	0.0383438	0.499191	0.145942	0.496648	0.16248	0.646844	0.0498653	0.678215	0.127682	0.720409	0.0689702	0.437505	0.0976928	0.838024	0.138846	0.444591	0.0761529	0.541622	0.0562641	0.609578	0.0572314	0.530984	0.2096	0.486894	0.0943986
238	ACTN4_Y260_T259I	ACTN4	Y260	KAIMIYVSSFY	2	0.464996	0.132614	0.367517	0.176855	0.416242	0.121892	0.971934	0.147135	1.02979	0.215628	0.962695	0.279542	0.421996	0.0771974	1.07929	0.267973	0.463774	0.133553	0.700798	0.260081	0.4699	0.150416	0.519914	0.135593	0.346547	0.0459921
239	ACTN4_Y260_T259I_YF	ACTN4	Y260	KAIMIYVSSFF	1	0.533728	0.0764711	0.421992	0.19676	0.429188	0.0867062	0.683982	0.168085	0.925453	0.115134	0.944792	0.147715	0.444419	0.118775	1.06435	0.221431	0.44613	0.0804628	0.666005	0.185798	0.456741	0.126145	0.605673	0.164518	0.457016	0.0341199
240	ACTN4_Y260_YF	ACTN4	Y260	KAIMTYVSSFF	1	0.59212	0.0639026	0.558979	0.0661043	0.530672	0.0788606	0.527049	0.108245	0.560964	0.218311	0.911079	0.0790242	0.437413	0.0727844	0.821455	0.146184	0.533485	0.0809744	0.647095	0.170216	0.570273	0.123865	0.601753	0.128152	0.493562	0.0819126
241	ACTN4_Y265	ACTN4	Y265	YVSSFYHAFSG	2	3.67776	0.162265	2.75592	0.289492	2.82102	0.224931	1.28143	0.612153	0.89546	0.180068	1.04077	0.236131	0.563667	0.0911403	0.883633	0.157599	3.31242	1.30237	2.31964	1.4277	2.20863	0.36084	1.40949	0.225036	8.89643	1.12829
242	ACTN4_Y265_S262F	ACTN4	Y265	YVFSFYHAFSG	2	0.963876	0.232909	0.692444	0.235271	0.834927	0.355318	1.10201	0.419445	1.43738	0.208959	1.36771	0.16409	0.689603	0.15737	1.43088	0.487252	0.920895	0.182329	1.1264	0.220018	1.14769	0.124312	0.825476	0.129209	3.14092	0.499083
243	ACTN4_Y265_S262F_YF	ACTN4	Y265	FVFSFYHAFSG	1	0.713693	0.150401	0.505227	0.102681	0.525203	0.154848	0.994398	0.304322	1.24641	0.282278	0.962858	0.407592	0.454618	0.203866	1.10391	0.50609	0.492281	0.16596	0.692567	0.290188	0.808266	0.0825499	0.811563	0.405906	1.5961	0.530224
244	ACTN4_Y265_S262P	ACTN4	Y265	YVPSFYHAFSG	2	2.1716	0.158433	1.81866	0.366242	1.9412	0.19392	1.06046	0.502498	0.793682	0.0406413	0.810243	0.108968	0.40698	0.0837947	0.990162	0.152127	1.31885	0.499971	1.17297	0.501216	2.09296	0.372027	1.02578	0.159335	7.64927	1.37261
245	ACTN4_Y265_S262P_YF	ACTN4	Y265	FVPSFYHAFSG	1	1.88113	0.28769	1.47958	0.193803	1.48303	0.300116	0.835188	0.121549	0.823434	0.0856466	0.710527	0.111489	0.443832	0.0251496	0.830498	0.168826	0.796073	0.19288	0.823766	0.30246	1.22686	0.224773	0.755633	0.246801	7.33608	0.563238
246	ACTN4_Y265_YF	ACTN4	Y265	FVSSFYHAFSG	1	4.00777	0.245906	2.31757	0.233336	2.59898	0.963503	2.00771	0.667509	1.19238	0.131736	0.999261	0.320822	0.522494	0.136039	1.30158	0.32034	1.20152	0.221846	1.33712	0.274472	1.5118	0.395419	0.895968	0.142451	8.71382	1.76425
247	ACVRL1_Y375	ACVRL1	Y375	VGTKRYMAPEV	1	0.373131	0.0793173	0.361045	0.0589302	0.407132	0.0838765	0.531603	0.151131	0.637126	0.00186319	0.611196	0.173944	0.395218	0.0677829	0.610138	0.0763402	0.412845	0.141319	0.446159	0.10724	0.350713	0.0687911	0.42781	0.0990992	0.389499	0.111919
248	ACVRL1_Y375_E379D	ACVRL1	Y375	VGTKRYMAPDV	1	0.293109	0.0779947	0.306016	0.189031	0.333811	0.0702635	0.494257	0.288824	0.415136	0.0568405	0.424	0.144147	0.350479	0.0904443	0.491322	0.0824407	0.295779	0.0664936	0.411726	0.083474	0.419785	0.0515756	0.402201	0.131463	0.277276	0.0612431
249	ACVRL1_Y375_E379K	ACVRL1	Y375	VGTKRYMAPKV	1	0.30352	0.0392576	0.30127	0.0810057	0.327469	0.0901644	0.624649	0.364286	0.482268	0.0294328	0.377293	0.134275	0.442506	0.139028	0.455865	0.109441	0.391206	0.0610072	0.371521	0.10207	0.273858	0.0765426	0.28244	0.0336366	0.424237	0.0831108
250	ACVRL1_Y375_M376R	ACVRL1	Y375	VGTKRYRAPEV	1	0.335281	0.120435	0.378542	0.0278881	0.305228	0.0757834	0.498542	0.13398	0.351388	0.110408	0.442633	0.118214	0.36433	0.0430464	0.564972	0.196001	0.297915	0.0458834	0.363065	0.0861583	0.308133	0.0388473	0.338071	0.126067	0.3388	0.0807477
251	ACVRL1_Y375_M376V	ACVRL1	Y375	VGTKRYVAPEV	1	0.45824	0.0959203	0.450677	0.067353	0.350768	0.142259	0.54447	0.0713508	0.477252	0.160825	0.609658	0.18232	0.474238	0.103799	0.658093	0.123699	0.33156	0.135841	0.463966	0.191722	0.309468	0.075927	0.443842	0.110833	0.421863	0.0389941
252	ACVRL1_Y375_P378L	ACVRL1	Y375	VGTKRYMALEV	1	0.486348	0.18774	0.429153	0.112229	0.457946	0.115724	0.708781	0.177479	0.556583	0.145926	0.690777	0.122722	0.417613	0.0971895	0.750147	0.125514	0.471524	0.145487	0.541282	0.132891	0.549442	0.436582	0.450788	0.109308	0.448401	0.107321
253	ACVRL1_Y375_P378S	ACVRL1	Y375	VGTKRYMASEV	1	0.513099	0.238607	0.399529	0.0976429	0.398103	0.0329958	0.509476	0.0909408	0.53331	0.0945724	0.563508	0.102985	0.379581	0.0885672	0.602108	0.128764	0.410939	0.103864	0.333203	0.0437211	0.405921	0.0928256	0.364042	0.114746	0.388692	0.0797491
254	ACVRL1_Y375_R374Q	ACVRL1	Y375	VGTKQYMAPEV	1	0.598318	0.0466942	0.431793	0.0930718	0.429367	0.170785	0.673562	0.0980654	0.738063	0.159268	0.678489	0.141131	0.420101	0.118875	0.754119	0.101831	0.457879	0.121575	0.509806	0.105676	0.465971	0.0856236	0.653157	0.239013	0.469187	0.101377
255	ACVRL1_Y375_R374W	ACVRL1	Y375	VGTKWYMAPEV	1	0.415823	0.0773298	0.363832	0.121219	0.457531	0.22956	0.725585	0.441113	0.96305	0.27659	0.898628	0.178805	0.374463	0.0421792	0.763748	0.162745	0.827221	0.145282	0.747011	0.166409	1.77946	0.357823	1.93016	0.452109	2.90024	0.599761
256	ACVRL1_Y421	ACVRL1	Y421	GIVEDYRPPFY	2	0.433875	0.0347941	0.489798	0.163115	0.427419	0.190651	0.735401	0.299939	0.830596	0.0351477	0.980679	0.130726	0.456692	0.0348861	0.942309	0.113844	0.444523	0.0563555	0.632677	0.0993703	0.52158	0.193624	0.502007	0.253799	0.405956	0.0846734
257	ACVRL1_Y421_F425L	ACVRL1	Y421	GIVEDYRPPLY	2	0.411672	0.104559	0.454626	0.145559	0.382351	0.0514492	0.590414	0.07696	0.675417	0.0909068	0.727257	0.12121	0.398953	0.0295883	0.918064	0.129616	0.387081	0.0820455	0.608483	0.13164	0.382085	0.149585	0.482436	0.137322	0.393174	0.0651909
258	ACVRL1_Y421_F425L_YF	ACVRL1	Y421	GIVEDYRPPLF	1	0.373408	0.0786612	0.458453	0.147232	0.342992	0.0764031	0.511441	0.0823647	0.626478	0.137349	0.840568	0.0897754	0.406133	0.0879213	0.903645	0.0714292	0.433559	0.136841	0.721951	0.202257	0.44207	0.211782	0.417553	0.195181	0.37657	0.0909887
259	ACVRL1_Y421_F425V	ACVRL1	Y421	GIVEDYRPPVY	2	0.437388	0.0460088	0.405754	0.190223	0.505403	0.118694	0.538801	0.127196	0.770193	0.179318	0.816721	0.116976	0.478786	0.0960471	0.953487	0.136391	0.458343	0.119831	0.530499	0.0979354	0.524351	0.0915575	0.546631	0.255165	0.402961	0.101412
260	ACVRL1_Y421_F425V_YF	ACVRL1	Y421	GIVEDYRPPVF	1	0.413663	0.059669	0.4549	0.134127	0.389738	0.0832613	0.630228	0.0661974	0.625415	0.0735069	0.76714	0.180012	0.421513	0.078876	0.777372	0.0710971	0.413573	0.0285604	0.510108	0.116852	0.371538	0.0604799	0.460078	0.149923	0.445385	0.0797868
261	ACVRL1_Y421_G416S	ACVRL1	Y421	SIVEDYRPPFY	2	0.47157	0.182309	0.482849	0.169059	0.42662	0.208877	0.99526	0.087785	1.10509	0.0246222	1.21954	0.264647	0.803826	0.479354	1.2514	0.226013	0.552141	0.0900276	0.743157	0.221634	0.784926	0.350714	0.551454	0.228172	0.496348	0.164757
262	ACVRL1_Y421_G416S_YF	ACVRL1	Y421	SIVEDYRPPFF	1	0.450133	0.0656213	0.377534	0.12967	0.379586	0.152698	0.821218	0.152145	0.849744	0.12029	1.01051	0.344565	0.485037	0.0454494	1.00874	0.165508	0.434838	0.0675082	0.645969	0.136316	0.577632	0.229418	0.460152	0.0880436	0.472704	0.118135
263	ACVRL1_Y421_I417F	ACVRL1	Y421	GFVEDYRPPFY	2	0.521699	0.0878373	0.517364	0.192949	0.496117	0.17137	0.867926	0.38752	0.96905	0.121765	1.33296	0.487723	0.541296	0.0763692	1.13294	0.149763	0.560316	0.0663763	0.754387	0.314408	0.494611	0.0588239	0.491047	0.105564	0.519742	0.0913761
264	ACVRL1_Y421_I417F_YF	ACVRL1	Y421	GFVEDYRPPFF	1	0.500718	0.0799732	0.441585	0.152516	0.524744	0.113382	0.868373	0.0883695	0.879188	0.0506592	0.944151	0.0870964	0.410573	0.135259	0.987033	0.195332	0.536643	0.19181	0.599747	0.121046	0.504243	0.179127	0.443555	0.104444	0.428491	0.0983028
265	ACVRL1_Y421_P424R	ACVRL1	Y421	GIVEDYRPRFY	2	0.463617	0.0671117	0.44675	0.0505011	0.537058	0.127236	0.584747	0.198585	0.618942	0.0906991	0.699814	0.070948	0.518911	0.135767	0.952313	0.234726	0.409332	0.117674	0.521131	0.109096	0.375149	0.173566	0.614896	0.280637	0.674068	0.384471
266	ACVRL1_Y421_P424R_YF	ACVRL1	Y421	GIVEDYRPRFF	1	0.45859	0.0692751	0.371729	0.118705	0.426919	0.0882553	0.680981	0.157685	0.815688	0.173084	0.81064	0.173821	0.513464	0.209302	0.814174	0.170592	0.46653	0.0696932	0.655273	0.367957	0.615573	0.183674	0.468135	0.128037	0.625887	0.310459
267	ACVRL1_Y421_P424T	ACVRL1	Y421	GIVEDYRPTFY	2	0.346712	0.0537592	0.512758	0.28374	0.475273	0.178754	0.899124	0.655809	0.660596	0.106542	0.830294	0.405319	0.373049	0.0759704	0.865666	0.283397	0.440598	0.0534251	0.647702	0.118527	0.561107	0.372193	0.484188	0.189384	0.404137	0.0808455
268	ACVRL1_Y421_P424T_YF	ACVRL1	Y421	GIVEDYRPTFF	1	0.450136	0.0457645	0.394108	0.169132	0.415517	0.0974134	0.811226	0.260082	0.838251	0.0817879	0.896847	0.130158	0.468342	0.113618	1.03767	0.162732	0.591828	0.121753	0.651489	0.0911862	0.577686	0.115177	0.549259	0.136341	0.452069	0.0932454
269	ACVRL1_Y421_Y426C	ACVRL1	Y421	GIVEDYRPPFC	1	0.517029	0.0935471	0.492236	0.140866	0.405659	0.0917643	0.7824	0.156677	0.883379	0.134005	0.993957	0.175637	0.436931	0.066848	1.00889	0.237364	0.597702	0.377805	0.599219	0.0941046	0.510611	0.067859	0.531641	0.0615051	0.450856	0.0349126
270	ACVRL1_Y421_YF	ACVRL1	Y421	GIVEDYRPPFF	1	0.419755	0.0288143	0.464403	0.182611	0.41254	0.120289	0.700561	0.101905	0.814001	0.111171	0.824918	0.14246	0.442967	0.0952907	0.898546	0.12352	0.46814	0.0517074	0.66672	0.257622	0.496708	0.153468	0.497962	0.138709	0.416823	0.0441068
271	ADA_Y290	ADA	Y290	NDQANYSLNTD	1	0.535027	0.0946526	0.584932	0.192137	0.464998	0.100066	0.814457	0.154607	0.980797	0.183548	0.965744	0.176407	0.498296	0.128199	0.982329	0.102535	0.565924	0.141631	0.749396	0.137805	0.622866	0.0613848	0.680153	0.0958247	0.560837	0.0851054
272	ADA_Y290_S291L	ADA	Y290	NDQANYLLNTD	1	0.467619	0.0992952	0.490675	0.195405	0.468982	0.217562	0.680624	0.127862	0.933959	0.155961	0.986812	0.280676	0.379342	0.0808196	0.967683	0.0567586	0.431739	0.0447397	0.601169	0.159985	0.557663	0.108595	0.559865	0.202067	0.394697	0.0870762
273	ADA_Y308	ADA	Y308	TLDTDYQMTKR	1	0.350168	0.0789344	0.483148	0.16967	0.444761	0.234895	0.499323	0.110239	0.631545	0.0422994	0.769733	0.222299	0.697234	0.725883	0.781467	0.242593	0.462133	0.0920143	0.583545	0.150727	0.449741	0.211248	0.50444	0.209009	0.363227	0.0753011
274	ADA_Y308_L304R	ADA	Y308	TRDTDYQMTKR	1	0.309916	0.04154	0.377469	0.084906	0.373125	0.0524062	0.500982	0.104999	0.524847	0.0398253	0.639034	0.188641	0.358619	0.0713081	0.645651	0.199676	0.394241	0.127216	0.700433	0.350886	0.382529	0.115626	0.445969	0.24184	0.344266	0.018705
275	ADA_Y84	ADA	Y84	IKRIAYEFVEM	1	0.382782	0.0705694	0.437619	0.134078	0.413514	0.177375	0.599343	0.188227	0.701453	0.0680171	0.849904	0.0959172	2.9605	0.533592	0.836519	0.17852	0.564443	0.142191	0.579949	0.110598	0.38697	0.0542805	0.478376	0.28484	0.388258	0.0477695
276	ADA_Y84_A83D	ADA	Y84	IKRIDYEFVEM	1	0.403632	0.0683385	0.469356	0.182973	0.476512	0.191914	0.62246	0.0770823	0.93237	0.580273	0.890435	0.164381	1.82542	0.546391	1.17609	0.647463	1.01793	0.397641	0.742413	0.179718	6.07515	1.33154	3.21969	1.03776	0.375487	0.068316
277	ADA_Y84_K80R	ADA	Y84	IRRIAYEFVEM	1	0.458438	0.0799858	0.416569	0.150264	0.433325	0.0687377	0.488569	0.130893	0.637868	0.0919075	0.886847	0.131117	2.85411	0.363641	0.872354	0.10582	0.869145	0.715444	0.510694	0.141452	0.342837	0.0134605	0.543135	0.165901	0.468675	0.0402121
278	ADA2_Y337	ADA2	Y337	HSLHDYKEALM	1	0.521673	0.163293	0.444202	0.104086	0.342168	0.0657847	0.663553	0.205587	0.695542	0.171002	0.662861	0.147489	0.439528	0.309919	0.844144	0.382594	0.371487	0.199756	0.566909	0.115742	0.546128	0.103762	0.448249	0.120266	0.430839	0.160475
279	ADA2_Y337_H335R	ADA2	Y337	HSLRDYKEALM	1	0.560379	0.0608516	0.388	0.0503006	0.679164	0.172268	0.751207	0.110803	1.03328	0.322326	0.746166	0.279901	0.439802	0.113871	1.39946	0.49546	0.601166	0.431459	0.881486	0.49675	0.775085	0.359822	0.44986	0.217748	0.649022	0.0978035
280	ADAM12_Y895	ADAM12	Y895	RPAPQYPHQVP	1	0.819225	0.443518	0.715258	0.140085	0.581909	0.210135	1.009	0.447543	1.35604	0.49404	1.30396	0.260261	0.685283	0.20313	1.023	0.455064	0.607928	0.696412	1.02946	0.406366	0.572372	0.0875284	0.462675	0.444098	0.718379	0.176184
281	ADAM12_Y895_P893S	ADAM12	Y895	RPASQYPHQVP	1	0.459138	0.137746	0.609961	0.0395254	0.553448	0.126586	0.374459	0.10295	0.560302	0.131016	0.532824	0.337097	0.464057	0.160444	0.548086	0.185552	0.476473	0.148673	0.4034	0.24708	0.205303	0.171159	0.688767	0.255541	0.418967	0.0600992
282	ADAMTS16_Y1211	ADAMTS16	Y1211	CSHKFYGKQCC	1	0.268308	0.0696904	0.34568	0.115744	0.415375	0.1418	0.505495	0.115655	0.513306	0.0268877	0.607334	0.159367	0.447614	0.0546206	0.672979	0.164984	0.391434	0.053606	0.499451	0.118586	0.497617	0.0978627	0.477079	0.227102	0.395653	0.0708644
283	ADAMTS16_Y1211_K1209M	ADAMTS16	Y1211	CSHMFYGKQCC	1	0.57336	0.0692832	0.653148	0.204819	0.519209	0.188482	0.713171	0.0572684	0.851848	0.11196	0.838907	0.125706	0.539417	0.116611	1.01178	0.139798	0.463694	0.07218	0.60578	0.200866	0.587421	0.079655	0.542533	0.134639	0.485029	0.0429758
284	ADAMTS18_Y764	ADAMTS18	Y764	HKANEYYPVVL	2	1.64739	0.173293	0.956151	0.230312	1.94788	0.961042	2.48748	2.36251	9.18369	3.03755	2.85836	0.678053	2.59824	1.08882	1.2229	0.467922	23.1515	12.1883	15.6982	8.4701	1.46828	0.512136	1.45312	0.215124	1.13001	0.222067
285	ADAMTS18_Y764_L769I	ADAMTS18	Y764	HKANEYYPVVI	2	0.427283	0.134777	0.675883	0.423491	0.722543	0.439283	0.609637	0.0865128	2.19118	0.944971	2.10132	1.86649	1.26172	0.531504	0.745765	0.4302	17.3747	2.55422	13.0953	2.70589	1.00647	0.579611	0.598865	0.452767	0.55814	0.326022
286	ADAMTS18_Y764_L769I_YF	ADAMTS18	Y764	HKANEYFPVVI	1	0.624891	0.17054	0.593776	0.223001	0.569494	0.125583	1.0075	0.295175	2.38049	0.512605	1.35472	0.355098	0.874027	0.463655	0.973355	0.231345	11.8331	3.6779	5.95597	3.12201	0.762039	0.31085	0.80593	0.3652	0.662605	0.240739
287	ADAMTS18_Y764_YF	ADAMTS18	Y764	HKANEYFPVVL	1	0.555602	0.0334143	0.806683	0.271261	0.53282	0.163278	0.628053	0.114429	1.83291	0.792228	0.871679	0.490965	0.735871	0.25056	0.896363	0.300961	8.41903	3.71688	4.38126	3.84085	0.950682	0.505139	1.49757	1.3808	0.527945	0.324236
288	ADAMTS18_Y765	ADAMTS18	Y765	KANEYYPVVLI	2	0.654798	0.143215	0.572429	0.23295	0.693254	0.276871	1.60333	0.3825	2.78962	0.69873	1.96789	0.890719	2.12225	0.397029	0.813368	0.112138	11.181	2.34506	9.01689	1.1276	3.63574	0.502939	3.10692	0.33775	0.541227	0.0587457
289	ADAMTS18_Y765_L769I	ADAMTS18	Y765	KANEYYPVVII	2	0.703885	0.0804132	0.61311	0.26547	0.737941	0.342172	2.3996	0.637429	3.1792	0.756791	2.6294	0.907376	1.45114	0.378996	0.978072	0.0619932	12.7742	3.24399	10.8313	1.73395	1.65122	0.0517309	2.07533	0.250353	0.809973	0.184209
290	ADAMTS18_Y765_L769I_YF	ADAMTS18	Y765	KANEFYPVVII	1	0.477981	0.116055	0.458115	0.158646	0.457793	0.137299	0.66283	0.137892	1.06538	0.389994	1.02979	0.182302	0.455981	0.0332921	1.16193	0.370573	1.90274	0.687142	1.2619	0.629664	0.410677	0.0316686	0.694956	0.341199	0.385871	0.043334
291	ADAMTS18_Y765_YF	ADAMTS18	Y765	KANEFYPVVLI	1	0.505558	0.0530628	0.481602	0.0711817	0.412238	0.0930901	0.680142	0.104367	1.0597	0.185732	1.02708	0.272049	0.819761	0.10858	1.14538	0.207658	2.76117	0.878216	1.96603	0.863517	0.448429	0.12043	0.480469	0.193431	0.450789	0.105246
292	ADAMTS9_Y100	ADAMTS9	Y100	SSQAHYRLSAF	1	0.409767	0.0564976	0.448676	0.0809571	0.433821	0.159919	0.480685	0.130634	0.482296	0.045741	0.650474	0.175967	0.346961	0.112795	0.584042	0.22307	0.399414	0.0768877	0.583871	0.186834	0.452138	0.084978	0.426212	0.210198	0.368445	0.0749734
293	ADAMTS9_Y100_S96P	ADAMTS9	Y100	SPQAHYRLSAF	1	0.503204	0.117452	0.424789	0.0254802	0.370482	0.0509837	0.597344	0.103248	0.583771	0.164858	0.532106	0.0756177	0.435775	0.155271	0.65932	0.106496	0.399697	0.0814714	0.427026	0.0739129	0.53099	0.225363	0.551648	0.231179	0.521364	0.231177
294	ADAMTS9_Y100_S96T	ADAMTS9	Y100	STQAHYRLSAF	1	0.322507	0.0530358	0.460995	0.148318	0.456361	0.218316	0.427194	0.062253	0.486929	0.0184203	0.582382	0.200492	0.385739	0.111328	0.629611	0.188514	0.440121	0.046502	0.535917	0.128441	0.394759	0.108081	0.380738	0.129013	0.409179	0.0880569
295	ADAMTSL2_Y594	ADAMTSL2	Y594	AMCVRYDGVEV	1	0.542121	0.138218	0.582995	0.0566174	0.643898	0.314666	0.817496	0.202312	1.00351	0.114774	1.19096	0.175705	0.790986	0.156642	1.26176	0.345427	0.6997	0.181608	0.78082	0.241029	0.76365	0.201948	0.735386	0.218798	0.49044	0.155622
296	ADAMTSL2_Y594_R593C	ADAMTSL2	Y594	AMCVCYDGVEV	1	1.02528	0.134129	0.679699	0.279783	0.654814	0.323348	0.816406	0.22555	1.03282	0.0855653	1.41957	0.2143	1.41074	0.235177	1.30935	0.155841	0.510543	0.0828411	0.882281	0.433187	0.585019	0.272865	0.588816	0.150921	0.410073	0.0880122
297	ADAMTSL3_Y1365	ADAMTSL3	Y1365	ENEGTYVCIAT	1	1.62497	0.0646113	1.43953	0.581991	1.0839	0.521501	0.851728	0.222152	1.09557	0.148705	1.46137	0.121599	1.3034	0.288153	1.37943	0.220012	1.29247	0.589351	1.44478	0.280876	1.7296	0.398606	1.16362	0.217992	0.661909	0.148973
298	ADAMTSL3_Y1365_T1370A	ADAMTSL3	Y1365	ENEGTYVCIAA	1	1.75134	0.254566	1.38734	0.308464	1.21357	0.494131	1.07906	0.310533	1.05429	0.209758	1.34273	0.172344	1.05247	0.230398	1.36342	0.258258	1.52682	0.734927	1.62354	0.522223	1.55362	0.267805	1.0914	0.153808	0.690308	0.0771676
299	ADAR_Y587	ADAR	Y587	EESSHYSTEKE	1	0.426959	0.0249631	0.633149	0.151824	0.589042	0.148537	0.603601	0.0996369	0.65833	0.169036	1.13698	0.263422	0.530937	0.0544772	1.47282	1.02303	0.597059	0.147291	0.5782	0.126636	0.620675	0.155986	0.493123	0.19138	0.508938	0.0654808
300	ADAR_Y587_Y587C	ADAR	Y587	EESSHCSTEKE	0	0.499784	0.0570287	0.598046	0.210327	0.597568	0.112159	0.558858	0.121986	0.800279	0.33805	1.05843	0.147267	0.423984	0.0904555	1.0147	0.298849	0.593472	0.0896895	0.662783	0.118385	0.630599	0.135678	0.682885	0.411124	0.501547	0.12194
301	ADCY10_Y318	ADCY10	Y318	AIQDAYMHITS	1	0.483047	0.0949091	0.51654	0.0905919	0.457377	0.0996664	0.587844	0.238884	0.583947	0.0222907	0.670746	0.0391728	0.496592	0.0652744	0.647076	0.152472	0.576023	0.175133	0.5229	0.100411	0.469087	0.101438	0.49214	0.241107	0.541939	0.0590782
302	ADCY10_Y318_A313T	ADCY10	Y318	TIQDAYMHITS	1	0.451446	0.102753	0.510059	0.108278	0.495683	0.107145	0.525003	0.0650959	0.675786	0.133244	0.699755	0.223912	0.416064	0.13315	0.798984	0.210299	0.623755	0.247792	0.429922	0.0933196	0.47909	0.0709029	0.398087	0.144088	0.52881	0.109683
303	ADD2_Y31	ADD2	Y31	EDDPEYMRLRN	1	0.509183	0.0912474	0.600677	0.291142	0.724444	0.284538	0.822933	0.255583	1.12483	0.179885	1.20013	0.0961785	0.588882	0.163626	1.16927	0.217706	0.785158	0.156554	0.887365	0.372493	0.674328	0.203523	0.593916	0.32462	0.414493	0.0735168
304	ADD2_Y31_D28N	ADD2	Y31	EDNPEYMRLRN	1	0.458825	0.0750826	0.444325	0.134036	0.489132	0.132965	0.713331	0.147169	1.04615	0.116427	1.08975	0.179102	0.44656	0.0594137	0.968723	0.131658	0.547104	0.209952	0.652942	0.14011	0.517636	0.156648	0.514765	0.202301	0.408474	0.0705883
305	ADD2_Y440	ADD2	Y440	NTPNTYLRVNV	1	0.43569	0.0477527	0.432762	0.207589	0.427711	0.119394	0.586721	0.130441	0.908451	0.153194	0.890559	0.128498	0.379969	0.0529623	0.979533	0.118937	0.440386	0.137021	0.598286	0.132633	0.412349	0.143875	0.469936	0.252691	0.346841	0.0669616
306	ADD2_Y440_T439A	ADD2	Y440	NTPNAYLRVNV	1	0.391455	0.0392893	0.437287	0.213018	0.468662	0.174674	0.705537	0.0950656	0.806077	0.0147161	0.868286	0.0283279	0.404842	0.0594284	0.933876	0.117874	0.437347	0.0488725	0.667186	0.0905962	0.462923	0.131751	0.465153	0.152161	0.404053	0.0347442
307	ADGRA2_Y377	ADGRA2	Y377	AGITAYQSCLQ	1	0.518339	0.0530378	0.632747	0.174413	0.567767	0.245284	0.917914	0.186848	1.02998	0.229497	1.12269	0.193865	0.62997	0.160457	1.30523	0.169921	0.561769	0.118346	0.951249	0.381973	0.684823	0.234136	0.717227	0.229352	0.590004	0.0524112
308	ADGRA2_Y377_T375K	ADGRA2	Y377	AGIKAYQSCLQ	1	0.549714	0.0933034	0.382616	0.0472499	0.537352	0.186343	0.850097	0.0983802	0.840767	0.129633	0.785632	0.181969	0.424318	0.109182	0.983193	0.284279	0.453383	0.159269	0.572468	0.198767	0.583307	0.12373	0.549917	0.195838	0.558286	0.0518723
309	ADGRD1_Y183	ADGRD1	Y183	EGLKVYVNGTL	1	0.417975	0.0470773	0.497279	0.1987	0.457432	0.196701	0.848292	0.148283	1.23528	0.128499	1.21593	0.107646	0.49099	0.133171	1.33186	0.222646	0.527356	0.0794131	1.04867	0.544926	0.63346	0.212979	0.680306	0.413427	0.469155	0.0537193
310	ADGRD1_Y183_E178K	ADGRD1	Y183	KGLKVYVNGTL	1	0.406043	0.0694572	0.363507	0.161362	0.441458	0.167129	0.584479	0.029731	0.923386	0.106874	1.11314	0.233618	0.451506	0.0629756	1.15903	0.168258	0.421425	0.0820633	0.676732	0.19493	0.523506	0.163322	0.575596	0.215061	0.431138	0.0930034
311	ADGRD1_Y183_V184I	ADGRD1	Y183	EGLKVYINGTL	1	0.400422	0.0647093	0.401232	0.141597	0.541169	0.174548	0.800464	0.0505677	1.37898	0.144525	1.17691	0.160617	0.554683	0.21674	1.49085	0.127713	0.55395	0.162484	0.852708	0.159902	0.663063	0.257275	0.613919	0.199005	0.337136	0.0731871
312	ADGRD1_Y571	ADGRD1	Y571	LSSISYVGCSL	1	0.605206	0.17962	0.681234	0.267757	0.747407	0.339603	0.790137	0.43252	0.870803	0.326441	1.01492	0.279887	0.444645	0.154247	1.01197	0.32692	0.719421	0.477707	0.837527	0.120297	0.760353	0.284428	1.109	1.26138	0.540797	0.237384
313	ADGRD1_Y571_I569V	ADGRD1	Y571	LSSVSYVGCSL	1	1.12269	0.2154	1.15797	0.0865511	1.01389	0.400263	1.35403	0.522282	1.2335	0.281477	1.19453	0.400558	0.979641	0.403506	1.4626	0.426021	0.949073	0.249442	1.03788	0.399857	0.632544	0.344898	1.05989	0.346712	1.05176	0.222247
314	ADGRD1_Y571_S567L	ADGRD1	Y571	LLSISYVGCSL	1	0.689856	0.133753	0.979702	0.640277	0.824454	0.492922	1.4525	0.31521	1.76828	0.290248	1.48162	0.396857	1.01439	0.399299	2.03097	0.41978	1.10257	0.449273	1.42485	0.396431	0.887643	0.290203	0.823251	0.692468	0.760691	0.328211
315	ADGRD1_Y85	ADGRD1	Y85	GVTLLYYGRYN	3	3.16633	0.321782	2.77268	0.687959	2.13079	0.428283	0.851565	0.14649	1.85061	0.325426	1.50154	0.313443	0.577387	0.0728899	1.30998	0.139536	0.610869	0.110256	0.826342	0.183624	0.807721	0.0746496	0.920049	0.280989	0.728311	0.150654
316	ADGRD1_Y85_T82M	ADGRD1	Y85	GVMLLYYGRYN	3	2.22858	0.106505	1.238	0.275331	1.20595	0.289729	0.594276	0.14864	1.34483	0.286233	1.53087	0.253251	0.515008	0.0709194	1.23936	0.341924	0.556064	0.169214	0.600283	0.143414	0.616083	0.1756	0.76071	0.409673	0.41559	0.0957964
317	ADGRD1_Y85_T82M_YF	ADGRD1	Y85	GVMLLYFGRFN	1	0.343208	0.115966	0.441335	0.240385	0.530826	0.19996	0.649544	0.166361	1.15003	0.386291	1.39882	0.096031	0.507833	0.0628956	1.25621	0.326247	0.529572	0.130219	0.705096	0.226008	0.528604	0.23048	0.528	0.288468	0.393225	0.130938
318	ADGRD1_Y85_Y85C	ADGRD1	Y85	GVTLLCYGRYN	2	0.969912	0.16451	0.708485	0.168792	0.508056	0.133859	0.974812	0.347579	1.23121	0.137358	1.30807	0.341464	0.562789	0.04216	1.54688	0.380544	0.435361	0.127644	0.90768	0.407195	0.707414	0.193059	0.682244	0.403194	0.396877	0.0745568
319	ADGRD1_Y85_Y85C_YF	ADGRD1	Y85	GVTLLCFGRFN	0	0.387778	0.0772536	0.442631	0.162236	0.586716	0.21317	0.899572	0.357198	1.09256	0.0267752	1.13907	0.255287	0.498058	0.0695511	1.53074	0.340704	0.523542	0.109914	0.88507	0.338786	0.731864	0.336565	0.669451	0.159218	0.384399	0.0722456
320	ADGRD1_Y85_Y89D	ADGRD1	Y85	GVTLLYYGRDN	2	0.815717	0.0547009	0.54536	0.194927	1.00613	0.146449	0.894205	0.127268	1.38956	0.114968	0.923259	0.133415	0.407568	0.0748228	1.00778	0.123694	0.543222	0.152312	0.685184	0.159819	0.605444	0.0985576	0.629148	0.151989	0.840754	0.220263
321	ADGRD1_Y85_Y89D_YF	ADGRD1	Y85	GVTLLYFGRDN	1	0.397679	0.0808685	0.353257	0.166703	0.515899	0.158028	0.642745	0.1813	0.93669	0.103067	0.887422	0.130177	0.480871	0.0516551	1.03966	0.0553394	0.487981	0.103463	0.73709	0.345606	0.633188	0.29916	0.423792	0.163398	0.321212	0.0488258
322	ADGRD1_Y85_YF	ADGRD1	Y85	GVTLLYFGRFN	1	0.426318	0.0711442	0.561808	0.251388	0.540768	0.241297	0.816792	0.149702	1.32486	0.288694	1.54524	0.378576	0.497378	0.0396044	1.34008	0.300648	0.448494	0.0913023	0.794106	0.170933	0.50141	0.140567	0.676306	0.485605	0.388844	0.0763931
323	ADGRE1_Y534	ADGRE1	Y534	SDPIIYTLENI	1	5.12801	0.685795	7.16984	2.75408	1.487	0.21517	0.653427	0.117193	0.947971	0.170276	0.963053	0.142826	7.52176	0.757232	1.31227	0.158694	0.490979	0.0519639	0.723574	0.189879	0.567892	0.068128	0.558676	0.142432	1.42461	0.186267
324	ADGRE1_Y534_I539V	ADGRE1	Y534	SDPIIYTLENV	1	4.9239	0.545937	7.00318	1.55558	1.61102	0.584155	0.722926	0.0831966	0.944728	0.302598	1.10401	0.0725777	5.09783	0.403201	1.38024	0.247416	0.576994	0.0884601	0.662704	0.0872041	0.500143	0.103861	0.57631	0.226433	1.08659	0.141133
325	ADGRE2_Y670	ADGRE2	Y670	SRPHLYGTPSR	1	0.441111	0.151291	0.614989	0.449327	0.564788	0.151863	0.538337	0.229737	0.588293	0.0659932	0.609448	0.179853	0.401838	0.125823	0.587077	0.170011	0.426124	0.128462	0.6193	0.233954	0.492983	0.161243	0.616647	0.130167	0.580309	0.116449
326	ADGRE2_Y670_S665F	ADGRE2	Y670	FRPHLYGTPSR	1	0.571942	0.0462889	0.546379	0.10903	0.947888	0.484269	0.718442	0.166472	0.610982	0.026035	0.681988	0.191344	0.945492	0.61796	0.84152	0.240268	0.746822	0.695211	0.511406	0.0867245	0.48102	0.292891	0.457546	0.115692	0.51333	0.0831814
327	ADGRG2_Y285	ADGRG2	Y285	AEPPDYSPVTH	1	0.417174	0.119013	0.542207	0.176401	0.598462	0.224752	0.792442	0.310127	0.836401	0.104941	1.66241	0.269741	0.763664	0.284873	1.05577	0.0992857	0.539823	0.0743375	0.785898	0.200124	0.817398	0.308389	0.581949	0.200498	0.490883	0.0708372
328	ADGRG2_Y285_H290Q	ADGRG2	Y285	AEPPDYSPVTQ	1	0.521595	0.149083	0.444406	0.140699	0.557163	0.131341	0.990122	0.416247	0.949873	0.133336	1.45917	0.235351	0.5462	0.158597	1.1613	0.290005	0.514007	0.128156	0.717198	0.213758	0.435183	0.136217	0.626222	0.278599	0.341832	0.0471761
329	ADGRG7_Y760	ADGRG7	Y760	LRVKMYNFLRS	1	0.867626	0.324486	1.74567	1.39972	1.58884	1.33875	1.24698	0.641619	1.47342	0.938602	2.63132	1.30916	1.08257	1.25855	3.21938	1.47607	1.71233	1.13618	2.58473	1.3658	1.40947	1.48344	2.1551	3.28747	1.19202	0.917626
330	ADGRG7_Y760_R756H	ADGRG7	Y760	LHVKMYNFLRS	1	0.711353	0.211798	0.614672	0.276139	0.62519	0.340191	2.26445	1.37376	1.68805	0.707711	1.96917	0.726011	1.114	0.534499	1.88856	0.826888	0.714011	0.566301	0.940421	0.650104	0.830542	0.238078	0.777873	0.363984	0.850066	0.308962
331	ADGRL4_Y301	ADGRL4	Y301	AVAFVYYKSIG	2	0.488547	0.0488722	0.458172	0.17232	0.463203	0.168784	0.670095	0.11028	1.20032	0.217555	1.17743	0.161304	0.529599	0.0518132	1.29099	0.228292	0.450861	0.0835676	0.641133	0.145683	0.614503	0.221155	0.585086	0.209032	0.401092	0.0577684
332	ADGRL4_Y301_V300L	ADGRL4	Y301	AVAFLYYKSIG	2	0.459346	0.144654	0.416756	0.0892619	0.517986	0.185319	1.07249	0.370943	1.24366	0.0527469	1.0863	0.14944	0.459878	0.183267	1.41457	0.15787	0.566488	0.107974	0.796014	0.336403	0.555019	0.145641	0.539591	0.112868	0.468505	0.086706
333	ADGRL4_Y301_V300L_YF	ADGRL4	Y301	AVAFLYFKSIG	1	0.441274	0.0489821	0.482708	0.201355	0.516078	0.201764	0.85105	0.241175	1.33281	0.110688	1.13469	0.386047	0.605059	0.0779684	1.62164	0.412477	0.548707	0.155714	0.836997	0.184316	0.683344	0.378248	0.649344	0.164061	0.477797	0.0468437
334	ADGRL4_Y301_YF	ADGRL4	Y301	AVAFVYFKSIG	1	0.42561	0.114573	0.643324	0.360678	0.625848	0.400868	0.937769	0.141819	1.15407	0.0956768	1.37898	0.424101	0.728184	0.270125	1.59641	0.36698	0.798344	0.335795	1.0137	0.259186	0.910515	0.437775	0.796972	0.467766	0.470712	0.072499
335	ADGRL4_Y302	ADGRL4	Y302	VAFVYYKSIGP	2	0.464626	0.154054	0.431696	0.119238	0.524244	0.162252	0.906939	0.267406	1.29845	0.141376	1.40955	0.13876	0.658213	0.0861701	1.60203	0.133719	0.656	0.278975	0.87232	0.380434	0.678415	0.20515	0.653203	0.26633	0.441965	0.128029
336	ADGRL4_Y302_V300L	ADGRL4	Y302	VAFLYYKSIGP	2	0.392385	0.132881	0.450467	0.225669	0.624945	0.263504	1.43105	1.10898	1.4417	0.131782	1.21427	0.257797	0.58915	0.157798	1.53619	0.325098	0.531004	0.0880375	1.08819	0.671625	0.780449	0.275483	0.775821	0.305225	0.389299	0.0756131
337	ADGRL4_Y302_V300L_YF	ADGRL4	Y302	VAFLFYKSIGP	1	0.557801	0.190339	0.499823	0.282246	0.487591	0.213665	1.11571	0.147383	1.97618	0.687602	1.37861	0.234381	0.550118	0.14593	1.60327	0.562877	0.739107	0.148026	0.836567	0.292668	0.688558	0.407511	0.664069	0.198023	0.523196	0.10064
338	ADGRL4_Y302_YF	ADGRL4	Y302	VAFVFYKSIGP	1	0.406753	0.123086	0.50053	0.301835	0.42357	0.152661	1.04231	0.363861	0.86773	0.295016	1.2026	0.345179	0.595165	0.237557	1.3866	0.574567	0.54294	0.219076	0.781372	0.196143	0.662588	0.202003	0.570842	0.368172	0.421557	0.0497401
339	ADM_Y52	ADM	Y52	RMSSSYPTGLA	1	0.333543	0.098568	0.524826	0.094428	0.508715	0.309559	0.518482	0.249146	0.473495	0.16541	0.524805	0.208436	0.501982	0.185458	0.542087	0.159932	0.562476	0.226768	0.61287	0.180887	0.36982	0.144024	0.447241	0.0577915	0.432603	0.123899
340	ADM_Y52_S50R	ADM	Y52	RMSRSYPTGLA	1	0.376906	0.118871	0.381375	0.164551	0.389903	0.111817	0.594215	0.508356	0.419688	0.0690846	0.497449	0.090596	0.319449	0.0398012	0.594468	0.26313	0.360417	0.214824	0.458622	0.129935	0.382095	0.111739	0.348689	0.251476	0.453682	0.144847
341	ADPRS_Y75	ADPRS	Y75	TEALYYTDDTA	2	1.8959	0.313865	2.63253	1.30054	1.81945	1.25577	0.632757	0.281719	0.83315	0.188904	1.46287	0.100928	1.96764	0.563066	2.09069	0.951466	3.91086	2.39768	4.22167	1.95331	1.31251	0.918356	0.780169	0.351035	4.20627	1.29462
342	ADPRS_Y75_T79P	ADPRS	Y75	TEALYYTDDPA	2	2.59055	0.381292	1.9066	0.985162	1.79353	0.470681	1.09304	0.218181	1.06136	0.193164	1.96714	0.325105	1.92142	0.423001	1.81948	0.527457	5.20111	1.13303	5.62366	1.1064	1.19922	0.623002	0.881935	0.211087	6.19675	0.879531
343	ADPRS_Y75_T79P_YF	ADPRS	Y75	TEALFYTDDPA	1	0.796729	0.169713	0.64533	0.213542	0.759565	0.118002	1.25245	0.454066	1.64631	0.157338	1.62129	0.215701	0.863102	0.185269	1.82501	0.634137	0.73448	0.191862	1.29614	0.806281	1.04772	0.217143	0.89369	0.357173	0.698717	0.22288
344	ADPRS_Y75_YF	ADPRS	Y75	TEALFYTDDTA	1	0.634092	0.103207	0.56767	0.20789	0.602426	0.175085	0.787494	0.259712	1.16728	0.104813	1.26134	0.172995	0.556954	0.0990781	1.439	0.157761	0.535325	0.140721	0.753877	0.179392	0.642772	0.273757	0.61366	0.197639	0.541282	0.101089
345	ADRB2_Y219	ADRB2	Y219	IMVFVYSRVFQ	1	0.486038	0.13331	0.445335	0.175559	0.435144	0.141921	0.844216	0.219889	0.930389	0.0499619	0.960926	0.155522	0.487161	0.0466858	1.16016	0.349513	0.445033	0.150568	0.786359	0.387488	0.553639	0.13598	0.484475	0.25872	0.447947	0.131317
346	ADRB2_Y219_S220C	ADRB2	Y219	IMVFVYCRVFQ	1	0.395377	0.121912	0.510212	0.233911	0.472876	0.0754367	0.630294	0.245711	0.69914	0.13732	0.729392	0.290012	0.434717	0.172647	0.836492	0.258859	0.840794	0.535413	0.631503	0.191956	0.423901	0.107979	0.488211	0.138993	0.449411	0.0454052
347	ADSL_Y432	ADSL	Y432	IQVDAYFSPIH	1	0.484494	0.101693	0.605072	0.355435	0.683526	0.237152	0.936139	0.23852	2.14492	0.274524	1.16497	0.286221	0.651602	0.154743	1.32822	0.208083	0.637514	0.210502	0.772027	0.171229	0.737769	0.131	0.750321	0.119221	0.55112	0.0399496
348	ADSL_Y432_D430N	ADSL	Y432	IQVNAYFSPIH	1	0.542863	0.130573	0.431258	0.0619802	0.54321	0.111787	1.13826	0.142027	2.1598	0.25105	1.76183	1.12687	0.548013	0.116796	1.28774	0.285833	0.594937	0.21199	0.794507	0.401981	0.726781	0.0603981	0.53596	0.234486	0.589033	0.197046
349	AFG3L2_Y614	AFG3L2	Y614	LPKEQYLYTKE	2	0.913406	0.227876	0.634002	0.203924	0.766577	0.127154	1.48358	0.447777	1.40657	0.377373	1.29917	0.434665	0.750353	0.194337	1.41534	0.488955	0.788912	0.335822	0.997887	0.640356	0.89479	0.458373	0.574018	0.243638	0.792293	0.547934
350	AFG3L2_Y614_Y616C	AFG3L2	Y614	LPKEQYLCTKE	1	0.426657	0.10374	0.465692	0.0914246	0.409181	0.0839282	0.723066	0.128722	0.868016	0.0926402	0.858396	0.219697	0.562413	0.113386	1.00859	0.116192	0.482264	0.125611	0.652653	0.319465	0.462827	0.0384046	0.428205	0.11315	0.409139	0.0579973
351	AFG3L2_Y614_YF	AFG3L2	Y614	LPKEQYLFTKE	1	0.405767	0.170042	1.58754	1.47081	0.996001	0.967027	0.550549	0.220343	0.531672	0.143022	0.829652	0.339555	0.817087	0.821332	1.49393	1.57803	0.623116	0.3507	1.50594	1.21213	1.19503	1.17852	0.471034	0.645743	0.499047	0.577655
352	AGXT_Y194	AGXT	Y194	GGTPLYMDRQG	1	0.504968	0.0906922	0.516412	0.0759929	1.26114	0.551873	0.498743	0.0897158	0.512537	0.0941649	0.606413	0.1056	0.430595	0.130046	0.614471	0.119229	0.400636	0.0992074	0.469715	0.182692	0.464861	0.107493	0.500988	0.132655	0.409129	0.0781864
353	AGXT_Y194_G190R	AGXT	Y194	GRTPLYMDRQG	1	0.528137	0.121118	0.495372	0.0576018	0.701813	0.282482	0.473499	0.0419909	0.471853	0.01119	0.57505	0.268442	0.344466	0.100015	0.49825	0.0927085	0.396014	0.0630956	0.415439	0.112144	0.452341	0.113997	0.442986	0.0682322	0.432194	0.104912
354	AGXT_Y194_M195R	AGXT	Y194	GGTPLYRDRQG	1	0.357985	0.089147	0.377781	0.078494	0.397814	0.0916405	0.49972	0.110816	0.399616	0.0278468	0.652437	0.295622	0.414515	0.07463	0.498807	0.0425472	0.440374	0.116533	0.423121	0.135472	0.38307	0.083673	0.435034	0.134716	0.363813	0.0125413
355	AGXT_Y231	AGXT	Y231	AKKKMYSRKTK	1	0.420071	0.09414	0.430819	0.138875	0.496385	0.111531	0.477682	0.213542	0.454755	0.0782298	0.595065	0.283922	0.442746	0.0720482	0.504842	0.191289	0.546018	0.131175	0.475801	0.13246	0.436885	0.0624545	0.384933	0.122435	0.456809	0.0327517
356	AGXT_Y231_R233C	AGXT	Y231	AKKKMYSCKTK	1	0.473732	0.173392	0.416663	0.190949	0.536716	0.368171	1.94795	1.13449	2.73408	1.37121	1.00661	0.561613	0.612556	0.236287	1.1861	0.544416	0.588162	0.236445	1.63608	0.771122	0.620111	0.183133	0.577636	0.228628	0.528854	0.0960786
357	AGXT_Y231_R233H	AGXT	Y231	AKKKMYSHKTK	1	0.72729	0.384378	0.609013	0.284965	0.666422	0.588107	1.62368	0.717922	3.12226	1.69559	0.960891	0.694946	1.11599	0.666166	1.63236	0.791162	0.620956	0.267825	2.36836	0.942185	1.01014	0.400718	0.823365	0.434092	0.689402	0.187091
358	AGXT_Y231_R233L	AGXT	Y231	AKKKMYSLKTK	1	0.433855	0.118849	0.36512	0.150817	0.440471	0.211426	0.772881	0.282479	0.79472	0.336443	0.403653	0.259792	0.373295	0.167951	0.791207	0.599828	0.38948	0.1605	0.852799	0.346234	0.317491	0.13482	0.462967	0.113471	0.434773	0.143805
359	AGXT_Y297	AGXT	Y297	REAAAYLHGRL	1	0.655039	0.105169	0.543135	0.18896	0.479196	0.0339703	1.039	0.341298	1.00205	0.140376	0.890899	0.349126	0.501769	0.0880873	1.02987	0.12647	0.670705	0.31625	0.594837	0.174126	0.322163	0.21704	0.57122	0.258327	0.583986	0.345811
360	AGXT_Y297_A295T	AGXT	Y297	REATAYLHGRL	1	0.520661	0.122732	0.595314	0.095459	0.488235	0.0854167	0.630253	0.245543	0.871132	0.210083	0.664546	0.286786	0.615295	0.340832	0.793348	0.369017	0.534457	0.234657	0.53261	0.207632	0.539364	0.0639861	0.661772	0.260546	0.37448	0.11689
361	AGXT_Y297_L298P	AGXT	Y297	REAAAYPHGRL	1	0.32874	0.0887474	0.273971	0.0600814	0.404474	0.103128	0.415102	0.118838	0.703745	0.180948	0.515787	0.208068	0.191925	0.0497026	0.45973	0.161319	0.249636	0.12966	0.409575	0.124355	0.254417	0.0760124	0.442427	0.105576	0.320031	0.0570827
362	AHCY_Y143	AHCY	Y143	LIHTKYPQLLP	1	0.378771	0.0717122	0.449136	0.306513	0.427587	0.0623659	0.574896	0.270601	0.679165	0.1696	0.808214	0.365459	0.39525	0.24376	0.809912	0.232233	0.638941	0.349463	0.572698	0.14504	0.641555	0.168933	0.561532	0.261157	0.600464	0.279507
363	AHCY_Y143_Y143C	AHCY	Y143	LIHTKCPQLLP	0	0.433067	0.0532315	0.437507	0.0723344	0.509492	0.180991	0.604301	0.0930575	0.654409	0.172503	0.693049	0.162689	0.459913	0.118965	0.935869	0.334002	0.508644	0.10557	0.630594	0.149247	0.515774	0.0900872	0.606622	0.179784	0.476133	0.10807
364	AHNAK_Y964	AHNAK	Y964	KVKGEYDMTVP	1	0.413859	0.105489	0.434263	0.238216	0.442705	0.28088	0.372258	0.0771038	0.543097	0.210194	0.668612	0.317398	0.6367	0.303399	0.744021	0.275798	0.469417	0.123965	0.607434	0.399256	0.491329	0.0741522	0.359585	0.291085	0.462904	0.224394
365	AHNAK_Y964_G962V	AHNAK	Y964	KVKVEYDMTVP	1	0.555487	0.100993	0.491509	0.182993	0.484816	0.12216	0.861811	0.185934	0.871971	0.197723	0.939867	0.243379	0.51012	0.110697	1.03225	0.0800642	0.494587	0.181463	0.646117	0.253788	0.450481	0.104105	0.589695	0.17006	0.478403	0.152508
366	AHSG_Y314	AHSG	Y314	LHRAHYDLRHT	1	0.556363	0.160964	0.617239	0.341959	0.876429	0.0794075	0.908454	0.157448	0.724601	0.117232	0.621196	0.348521	0.799834	0.0966347	1.10939	0.536956	0.707104	0.151796	1.099	0.546073	0.668297	0.179394	0.779736	0.339765	0.417552	0.103593
367	AHSG_Y314_R317C	AHSG	Y314	LHRAHYDLCHT	1	0.494974	0.0771069	0.401002	0.0833617	0.470293	0.0497482	0.776658	0.181449	0.880182	0.0897732	0.813551	0.0530731	0.515984	0.177753	1.12084	0.310562	0.513034	0.109699	0.647536	0.245618	0.571645	0.115236	0.541719	0.0714957	0.435037	0.0290077
368	AHSG_Y314_R317H	AHSG	Y314	LHRAHYDLHHT	1	0.504938	0.126502	0.636816	0.191579	0.553298	0.110748	0.781299	0.28787	0.646042	0.238179	0.836225	0.275475	1.35785	0.246588	1.01138	0.209724	0.510695	0.258897	0.856592	0.405412	0.689773	0.281806	0.673976	0.450786	0.496118	0.162372
369	AICDA_Y146	AICDA	Y146	FKDYFYCWNTF	2	1.40517	0.217181	0.651704	0.0936941	0.557311	0.123969	1.21586	0.326604	3.71114	1.05452	2.03516	0.613579	1.45675	0.821917	1.34315	0.569991	8.79004	3.11301	7.02352	1.5751	4.04744	1.18344	2.86709	1.37576	2.79651	0.607454
370	AICDA_Y146_F151S	AICDA	Y146	FKDYFYCWNTS	2	0.885413	0.0751221	0.618253	0.259882	0.598907	0.30707	0.972809	0.174275	3.6649	1.11318	2.61675	0.320869	1.02748	0.0643801	1.43634	0.107922	11.1987	1.83461	9.31497	1.61062	5.40092	1.07678	2.58265	0.674449	2.13691	0.177668
371	AICDA_Y146_F151S_YF	AICDA	Y146	FKDFFYCWNTS	1	0.588602	0.0839634	0.45814	0.157139	0.58891	0.208404	1.08095	0.291992	1.42251	0.0851153	1.3241	0.129665	0.768247	0.232421	1.49918	0.493134	0.496086	0.134866	0.938762	0.336625	0.941755	0.31568	0.610499	0.159439	0.835928	0.129493
372	AICDA_Y146_YF	AICDA	Y146	FKDFFYCWNTF	1	1.24693	0.283973	0.617565	0.0840527	0.624382	0.149979	1.18874	0.36385	1.72669	0.0950522	1.87206	0.705884	1.40978	0.614814	1.93389	0.457818	0.74934	0.150062	1.09283	0.453346	0.861993	0.454226	0.804472	0.249671	2.5494	0.325686
373	AIFM1_Y347	AIFM1	Y347	KILPEYLSNWT	1	0.503499	0.0577393	0.462921	0.098089	0.481445	0.100966	0.676598	0.0863014	0.983414	0.0406712	0.994957	0.393962	0.424402	0.114639	0.914822	0.0998998	0.543245	0.0607962	0.672948	0.224266	0.428327	0.0399676	0.512637	0.0748231	0.508931	0.149661
374	AIFM1_Y347_L344F	AIFM1	Y347	KIFPEYLSNWT	1	0.479001	0.0438577	0.430398	0.102718	0.488494	0.135707	0.65708	0.196322	1.17712	0.12141	0.914153	0.0915963	0.502311	0.19535	0.916178	0.0729088	0.810925	0.224054	0.720713	0.126167	0.512605	0.155373	0.512141	0.0966677	0.470171	0.0971546
375	AIPL1_Y267	AIPL1	Y267	GIVKAYYVRAR	2	0.414514	0.0601927	0.394137	0.14891	0.395616	0.0279513	0.558135	0.133837	0.706366	0.433657	1.02941	0.447577	0.406959	0.0903759	0.771384	0.324908	0.460728	0.140361	0.547899	0.0743696	0.398438	0.0269625	0.470101	0.126433	0.464986	0.0969633
376	AIPL1_Y267_R270H	AIPL1	Y267	GIVKAYYVHAR	2	0.537878	0.196272	0.418486	0.151588	0.412238	0.096375	0.569041	0.0845247	0.865704	0.110711	0.731812	0.113494	0.45161	0.0821582	0.736483	0.0959193	0.482376	0.131569	0.51414	0.111683	0.497678	0.0829161	0.509892	0.131948	0.436065	0.108877
377	AIPL1_Y267_R270H_YF	AIPL1	Y267	GIVKAYFVHAR	1	0.427874	0.0879168	0.449172	0.207474	0.461263	0.130522	0.602326	0.184221	0.729887	0.150615	0.795464	0.105626	0.480912	0.0657855	0.871517	0.174186	0.387503	0.0911601	0.605039	0.128119	0.421877	0.179708	0.494355	0.171264	0.447879	0.0461363
378	AIPL1_Y267_YF	AIPL1	Y267	GIVKAYFVRAR	1	0.467084	0.0365325	0.488004	0.0966612	0.503115	0.0831014	0.669074	0.239147	1.12998	0.980531	1.10742	0.4848	0.463374	0.0734978	0.991399	0.393689	0.487061	0.154763	0.558282	0.215817	0.444582	0.108023	0.433742	0.15665	0.512266	0.0690913
379	AIPL1_Y268	AIPL1	Y268	IVKAYYVRARA	2	0.360542	0.0623597	0.466196	0.0771073	0.418924	0.127967	0.511647	0.247179	0.742612	0.46297	1.01143	0.155792	0.39582	0.0842652	0.936029	0.458118	0.466392	0.0822674	0.470751	0.153131	0.357842	0.110049	0.469641	0.334016	0.50159	0.148363
380	AIPL1_Y268_R270H	AIPL1	Y268	IVKAYYVHARA	2	0.432448	0.123488	0.424189	0.212761	0.594924	0.152929	0.662684	0.141455	0.818067	0.135865	0.857324	0.104164	0.573661	0.04949	0.978438	0.13862	0.538101	0.121	0.6332	0.154152	0.566791	0.0943803	0.533479	0.165447	0.57184	0.109341
381	AIPL1_Y268_R270H_YF	AIPL1	Y268	IVKAFYVHARA	1	0.410433	0.0973057	0.585078	0.0852094	0.487844	0.167693	0.717502	0.133123	0.955273	0.19233	1.04508	0.236087	0.558541	0.126669	1.18263	0.180327	0.478917	0.071172	0.825089	0.201834	0.492287	0.151116	0.62144	0.195656	0.600908	0.249159
382	AIPL1_Y268_YF	AIPL1	Y268	IVKAFYVRARA	1	0.396244	0.039831	0.433485	0.169301	0.494386	0.140771	0.699075	0.152031	0.950298	0.412653	1.11454	0.18211	0.464521	0.172531	1.07251	0.258421	0.464482	0.11833	0.687562	0.129127	0.500197	0.196691	0.588252	0.269186	0.423761	0.0890099
383	AK7_Y390	AK7	Y390	KELANYYKLHH	2	0.509153	0.0359801	0.453023	0.0517113	0.495334	0.110601	0.497041	0.0964991	2.44165	0.662396	0.707967	0.156884	0.382826	0.0767278	0.684858	0.230074	2.92628	0.809989	1.82774	1.1257	4.11514	2.43887	1.88739	0.801657	0.844498	0.111167
384	AK7_Y390_N389K	AK7	Y390	KELAKYYKLHH	2	0.43933	0.127311	0.349619	0.071125	0.390275	0.0605319	0.459812	0.0690383	0.379399	0.0679099	0.472115	0.0205579	0.383461	0.0500897	0.472418	0.0743197	0.376758	0.101386	0.417628	0.067616	0.366132	0.0551347	0.36304	0.111948	0.422144	0.0877816
385	AK7_Y390_N389K_YF	AK7	Y390	KELAKYFKLHH	1	0.493141	0.0581721	0.505168	0.138493	0.483605	0.0814026	0.438693	0.0944375	0.486596	0.115078	0.596336	0.098327	0.465707	0.0804718	0.625982	0.180658	0.456003	0.10943	0.542905	0.0750672	0.394391	0.0416935	0.458905	0.0888985	0.509695	0.0604542
386	AK7_Y390_YF	AK7	Y390	KELANYFKLHH	1	0.480878	0.040709	0.566816	0.168057	0.485977	0.155296	0.439206	0.0911688	1.6781	0.411084	0.643785	0.114413	0.442137	0.217816	0.877401	0.266395	1.15309	0.603329	0.830142	0.293847	0.726717	0.225063	0.536991	0.180497	0.545085	0.104382
387	AK7_Y391	AK7	Y391	ELANYYKLHHI	2	0.762063	0.143577	0.565687	0.0935926	0.74261	0.197767	0.564942	0.170398	6.7551	1.29587	0.64735	0.132176	0.629013	0.0883505	0.591397	0.129194	6.90608	1.02803	4.76668	1.99803	13.6512	5.33166	12.2762	6.04357	3.35675	0.8794
388	AK7_Y391_N389K	AK7	Y391	ELAKYYKLHHI	2	0.477548	0.0570245	0.409522	0.0946209	0.393096	0.114083	0.665336	0.29054	0.986567	0.102696	0.88416	0.164643	0.461121	0.0368856	0.826782	0.136956	0.516127	0.102568	0.676951	0.150761	0.589307	0.180512	0.561888	0.110749	0.376034	0.125591
389	AK7_Y391_N389K_YF	AK7	Y391	ELAKFYKLHHI	1	0.504651	0.0354773	0.566444	0.110947	0.500675	0.0740216	0.620573	0.209838	0.645341	0.0775784	0.65002	0.0698387	0.461926	0.12046	0.762261	0.266507	0.453339	0.106354	0.531005	0.178981	0.546536	0.178673	0.452152	0.0377838	0.536357	0.0984136
390	AK7_Y391_YF	AK7	Y391	ELANFYKLHHI	1	0.818749	0.192075	0.688726	0.154229	0.795773	0.210298	0.799723	0.179408	0.921729	0.207093	0.630215	0.204945	0.874481	0.447206	1.06077	0.365362	0.560899	0.293003	0.67207	0.350636	0.637947	0.228335	0.862541	0.445798	0.66987	0.147336
391	AKAP4_Y554	AKAP4	Y554	LKLIQYHLTQQ	1	0.599097	0.277805	0.500497	0.0892142	0.533936	0.214017	0.645662	0.357525	1.28333	0.154459	0.902021	0.15318	0.711428	0.267827	1.33677	0.309467	0.931703	0.3493	0.878689	0.372241	0.879762	0.526603	0.774206	0.406513	1.14553	0.762656
392	AKAP4_Y554_T557I	AKAP4	Y554	LKLIQYHLIQQ	1	0.581521	0.114026	0.552974	0.281911	0.658789	0.098471	1.1588	0.327188	1.39505	0.103115	1.1962	0.172341	0.543593	0.120393	1.67165	0.52016	0.686878	0.108061	0.924252	0.280328	0.949637	0.261672	0.736886	0.279418	0.773756	0.326607
393	AKAP9_Y2482	AKAP9	Y2482	LENQTYFKSFE	1	0.579477	0.207574	1.07931	0.984822	1.21903	0.753746	0.871985	0.290874	1.12688	0.258952	1.58988	0.694155	0.669745	0.244825	1.32891	0.598522	0.956139	0.680987	0.902664	0.284668	1.23549	0.890862	1.23478	0.965369	0.809915	0.397897
394	AKAP9_Y2482_K2484R	AKAP9	Y2482	LENQTYFRSFE	1	0.549613	0.138786	0.85091	0.584631	0.677677	0.557355	0.84269	0.246422	1.09402	0.471644	0.881036	0.152981	0.631952	0.315441	1.14038	0.377185	0.570676	0.253223	1.02	0.915866	0.486629	0.280714	0.810952	0.429428	0.537344	0.246714
395	AKR1A1_Y50	AKR1A1	Y50	DCAAIYGNEPE	1	1.41948	0.354431	1.01907	0.319453	0.897318	0.4063	0.798829	0.218783	1.42059	0.239885	1.2658	0.216179	0.672166	0.160342	1.22359	0.244389	0.587566	0.100406	0.734382	0.174801	0.61232	0.143884	0.693581	0.346178	0.805638	0.278576
396	AKR1A1_Y50_E55D	AKR1A1	Y50	DCAAIYGNEPD	1	1.64697	0.334616	1.02019	0.34174	1.09188	0.570599	0.9776	0.14795	1.25451	0.309758	1.35351	0.170232	0.672424	0.0319629	1.63942	0.32285	0.638438	0.0939759	0.956741	0.378687	0.668076	0.232486	0.726104	0.344906	0.584581	0.068156
397	AKR1A1_Y50_N52S	AKR1A1	Y50	DCAAIYGSEPE	1	1.39797	0.338725	0.968358	0.403959	0.844295	0.186721	0.79054	0.187613	1.46072	0.698768	1.14186	0.248478	0.599456	0.0896018	1.33655	0.190477	0.453135	0.0983865	0.72597	0.18339	0.572034	0.127601	0.578392	0.0859805	0.47449	0.108786
398	AKR1B1_Y199	AKR1B1	Y199	EKLIQYCQSKG	1	0.478513	0.194459	0.448302	0.0920465	0.446086	0.0613425	0.462039	0.113504	0.573004	0.227954	0.520316	0.108139	0.424588	0.0693877	0.644469	0.111087	0.440289	0.124845	0.492874	0.1357	0.487233	0.0625809	0.563467	0.232481	0.42276	0.0388695
399	AKR1B1_Y199_G204S	AKR1B1	Y199	EKLIQYCQSKS	1	0.448287	0.0186279	0.475223	0.0626271	0.460284	0.138156	0.637702	0.15643	0.562069	0.0576709	0.678753	0.153888	0.476234	0.0406621	0.807178	0.140787	0.45909	0.0905807	0.642213	0.291547	0.583526	0.0305151	0.587971	0.140853	0.394778	0.109255
400	AKR1B1_Y40	AKR1B1	Y40	AIDVGYRHIDC	1	0.411376	0.0801977	0.466167	0.100157	0.457408	0.0785609	0.628605	0.209517	0.635171	0.0647122	0.636987	0.0881147	0.440233	0.0832186	0.844176	0.227515	0.476155	0.112588	0.621679	0.153563	0.419366	0.0805138	0.530619	0.193153	0.366352	0.0937943
401	AKR1B1_Y40_H42L	AKR1B1	Y40	AIDVGYRLIDC	1	0.512287	0.123834	0.42821	0.0888396	0.417432	0.0871723	0.86112	0.152521	0.791739	0.167102	0.874066	0.0987421	0.424463	0.0378526	1.20169	0.300099	0.514368	0.0963079	0.594296	0.128377	0.456104	0.132468	0.449989	0.185995	0.390236	0.0608423
402	AKR1B10_Y310	AKR1B10	Y310	SHLEDYPFNAE	1	0.395589	0.0427624	0.516741	0.189282	0.504327	0.104257	0.713072	0.356042	1.03441	0.173277	1.01063	0.20438	0.594204	0.0406779	1.1358	0.173497	0.489165	0.114411	0.771135	0.328232	0.567754	0.164709	0.510798	0.122318	0.413385	0.0917222
403	AKR1B10_Y310_N313D	AKR1B10	Y310	SHLEDYPFDAE	1	0.461768	0.0694146	0.484818	0.201716	0.447999	0.150192	0.671996	0.169646	1.30486	0.376391	0.986036	0.257324	0.469075	0.134207	1.13927	0.151056	0.467253	0.0690232	0.713892	0.145075	0.516429	0.176943	0.553753	0.138305	0.368647	0.0661677
404	AKR1B10_Y316	AKR1B10	Y316	PFNAEYGGGGG	1	0.284895	0.0977085	1.14373	0.90484	1.65784	1.18356	0.430138	0.160187	0.627462	0.244755	1.18571	1.14701	0.870516	0.373551	1.49441	1.15108	1.06034	0.630398	0.802303	0.43099	1.35039	1.34482	0.692901	0.539536	0.878902	1.03122
405	AKR1B10_Y316_N313D	AKR1B10	Y316	PFDAEYGGGGG	1	0.918454	0.324677	1.13342	0.189986	1.13633	0.378315	1.3059	0.25454	1.65791	0.25584	1.80999	0.252323	0.784236	0.142905	1.49902	0.366972	1.1556	0.410933	1.09491	0.303875	0.842978	0.349409	1.47557	0.752243	0.782996	0.298336
406	AKR1C2_Y305	AKR1C2	Y305	NRNVRYLTLDI	1	0.44089	0.0473533	0.38069	0.119925	0.522826	0.106641	0.634982	0.185289	0.835313	0.143751	0.743957	0.175092	0.395257	0.0333074	0.920876	0.193378	0.506523	0.0806707	0.498971	0.168736	0.392039	0.085017	0.505941	0.146439	0.496823	0.141578
407	AKR1C2_Y305_N300T	AKR1C2	Y305	TRNVRYLTLDI	1	0.383722	0.0646595	0.407303	0.131959	0.487188	0.101546	0.556542	0.0823706	0.683782	0.12036	0.633402	0.169948	0.428796	0.117061	0.887305	0.137122	0.421118	0.113702	0.633876	0.217135	0.786655	0.729698	0.520685	0.22414	0.371921	0.0531965
408	AKR1C2_Y81	AKR1C2	Y81	REDIFYTSKLW	1	0.437963	0.108355	0.692213	0.462039	0.769666	0.45354	0.606577	0.258067	0.946815	0.161479	1.06901	0.330872	0.543335	0.19523	1.12405	0.341809	0.592016	0.0619744	1.01518	0.2686	0.978243	0.610546	0.796338	0.477982	0.645029	0.2415
409	AKR1C2_Y81_I79V	AKR1C2	Y81	REDVFYTSKLW	1	0.66154	0.289927	0.890297	0.675102	0.801552	0.747087	1.24806	0.455431	1.413	0.419006	1.51582	0.459849	0.421985	0.058949	1.45096	0.40972	0.741854	0.185702	1.05057	0.57762	0.758834	0.304957	0.631237	0.421256	1.30195	0.0879814
410	AKR1C3_Y81_E77G	AKR1C3	Y81	RGDIFYTSKLW	1	0.735148	0.194286	0.610604	0.488128	0.460091	0.106589	0.888603	0.391068	1.33018	0.243025	1.71686	0.167254	0.648224	0.2302	1.59428	0.332402	0.922751	0.454455	1.09008	0.510861	0.96386	0.241439	0.963013	0.495423	0.803196	0.237841
411	AKR1D1_Y199	AKR1D1	Y199	VECHPYFTQPK	1	0.778502	0.114776	0.5592	0.15092	0.515321	0.179602	0.617415	0.222228	0.819395	0.123505	0.937977	0.117912	0.421345	0.0408673	1.01503	0.100045	0.590628	0.109262	0.708924	0.102688	0.524877	0.178128	0.517062	0.233771	0.370661	0.0748752
412	AKR1D1_Y199_P198L	AKR1D1	Y199	VECHLYFTQPK	1	0.910248	0.129971	0.588176	0.272233	0.631026	0.290419	1.02038	0.143119	1.58017	0.0778441	1.41609	0.262104	0.645015	0.130135	1.33308	0.351978	0.493398	0.154119	0.94577	0.404153	0.71733	0.32467	0.662966	0.291075	0.555829	0.109084
413	AKT1_Y437	AKT1	Y437	ETDTRYFDEEF	1	0.679489	0.118087	0.543818	0.113963	0.66507	0.0938495	0.87459	0.271444	1.37307	0.32744	1.32002	0.357339	0.563281	0.0958984	1.29077	0.276312	0.567162	0.112579	0.810224	0.188483	0.632849	0.0900153	0.71422	0.153544	0.526861	0.0850919
414	AKT1_Y437_T435P	AKT1	Y437	ETDPRYFDEEF	1	0.562793	0.130092	0.564566	0.14305	0.610804	0.155726	0.885559	0.273264	1.29029	0.151298	1.36523	0.332799	0.600496	0.101534	1.30727	0.21003	0.547646	0.0663157	0.787076	0.213907	0.625409	0.139198	0.604464	0.143864	0.483191	0.0536875
415	AKT3_Y173	AKT3	Y173	KASGKYYAMKI	2	0.399133	0.0775968	0.35893	0.0386384	0.529015	0.0611538	0.518222	0.139946	0.431148	0.120588	0.498579	0.141192	0.334577	0.0869793	0.563017	0.125413	0.564902	0.0863231	0.536259	0.115101	0.329244	0.0246005	0.411438	0.0495333	0.45476	0.0814623
416	AKT3_Y173_G171R	AKT3	Y173	KASRKYYAMKI	2	0.257144	0.125678	0.267279	0.0669184	0.338987	0.226913	0.393469	0.0757195	0.484029	0.0511326	0.415586	0.274602	0.588775	0.348417	0.476374	0.248675	0.481054	0.407305	0.353156	0.124107	0.220267	0.0267497	0.304174	0.101056	0.500275	0.210905
417	AKT3_Y173_G171R_YF	AKT3	Y173	KASRKYFAMKI	1	0.456315	0.0748556	0.358558	0.0972988	0.388138	0.0881368	0.623942	0.517484	0.569134	0.139864	0.554965	0.192276	0.388626	0.160471	0.5195	0.135498	0.364976	0.0911554	0.362724	0.122649	0.285899	0.105663	0.390877	0.122342	0.811036	0.76815
418	AKT3_Y173_YF	AKT3	Y173	KASGKYFAMKI	1	0.351158	0.0175448	0.343996	0.0618015	0.322886	0.0735634	0.447227	0.104149	0.507726	0.111819	0.494632	0.124513	0.339628	0.0499036	0.625979	0.120645	0.346508	0.0926174	0.421352	0.080086	0.372197	0.088894	0.337849	0.0235151	0.366861	0.102528
419	AKT3_Y174	AKT3	Y174	ASGKYYAMKIL	2	0.395939	0.0922383	0.445863	0.14086	0.433895	0.112657	0.582401	0.0873606	0.661527	0.108491	0.664298	0.191067	0.433614	0.0512675	0.657199	0.212123	0.740238	0.268182	0.622795	0.229749	0.313359	0.0369608	0.406585	0.112577	0.590982	0.135546
420	AKT3_Y174_G171R	AKT3	Y174	ASRKYYAMKIL	2	0.264989	0.0588493	0.347978	0.115641	0.368318	0.113678	0.37889	0.062975	0.385041	0.0826326	0.504607	0.168152	0.441255	0.193441	0.634301	0.358129	0.474804	0.0803964	0.535118	0.26083	0.36745	0.0612413	0.338309	0.165003	0.437185	0.0851899
421	AKT3_Y174_G171R_YF	AKT3	Y174	ASRKFYAMKIL	1	0.464273	0.116485	0.450189	0.180237	0.416538	0.138985	0.440674	0.0696849	0.700071	0.285941	0.724525	0.0946666	0.361641	0.0548243	0.616569	0.0899742	0.577728	0.0660426	0.517844	0.0965922	0.45936	0.0880982	0.427579	0.118225	0.441342	0.110579
422	AKT3_Y174_YF	AKT3	Y174	ASGKFYAMKIL	1	0.42575	0.0496402	0.528793	0.100394	0.529617	0.144472	0.675288	0.0887672	0.801172	0.0790381	0.857792	0.165767	0.542553	0.132058	1.06815	0.199361	0.608696	0.0834754	0.589013	0.0859516	0.518713	0.161228	0.625014	0.18166	0.50918	0.156923
423	ALAS2_Y199	ALAS2	Y199	WCSNDYLGMSR	1	0.842662	0.122503	0.550695	0.106351	0.781087	0.236946	0.599506	0.0288806	3.40602	0.239103	1.8516	0.62574	0.500166	0.0778634	0.844841	0.119775	1.57435	0.443706	1.2523	0.362388	0.958769	0.151054	0.751985	0.194399	0.398003	0.060011
424	ALAS2_Y199_R204Q	ALAS2	Y199	WCSNDYLGMSQ	1	1.05856	0.211316	0.540615	0.108133	0.738347	0.276292	0.781652	0.0603307	4.19295	0.541755	2.87641	0.625709	0.64209	0.21096	1.01853	0.086707	3.02985	0.282231	2.10988	0.669553	1.5251	0.209887	0.944336	0.339557	0.478212	0.0828143
425	ALAS2_Y199_Y199H	ALAS2	Y199	WCSNDHLGMSR	0	0.447099	0.0337667	0.433792	0.0416472	0.374929	0.0741862	0.504049	0.21732	0.537305	0.12156	0.754265	0.203669	0.437863	0.0834671	0.670953	0.195085	0.415554	0.0577702	0.576386	0.164304	0.394097	0.0610433	0.514288	0.146722	0.417862	0.0223633
426	ALB_Y108	ALB	Y108	TLRETYGEMAD	1	0.701531	0.0974957	0.627111	0.316393	0.555291	0.263783	0.885069	0.122868	0.982251	0.197859	0.998688	0.210745	0.446239	0.128292	1.19544	0.158469	0.518986	0.102264	0.835509	0.195117	0.539849	0.136614	0.558738	0.195484	0.453719	0.11396
427	ALB_Y108_E106K	ALB	Y108	TLRKTYGEMAD	1	0.418879	0.063779	0.38739	0.0504723	0.432875	0.172621	0.461688	0.130517	0.751925	0.221149	0.534901	0.0890925	0.378927	0.13811	0.708961	0.140421	0.507879	0.205732	0.510322	0.11658	0.307103	0.062686	0.35451	0.0769001	0.38127	0.114041
428	ALB_Y172	ALB	Y172	ARRHPYFYAPE	2	0.971642	0.348809	0.641153	0.331166	0.575421	0.345669	0.60495	0.20032	0.800188	0.117571	0.882931	0.391318	0.580346	0.291506	0.765775	0.223342	1.87171	1.0501	1.07631	0.501915	0.48786	0.220974	0.552585	0.29005	0.893397	0.266811
429	ALB_Y172_Y174F	ALB	Y172	ARRHPYFFAPE	1	0.721492	0.256861	0.579634	0.237258	0.402301	0.144011	0.537519	0.030656	0.726452	0.313081	1.09036	0.532922	0.558516	0.206661	0.74557	0.107791	2.84841	1.30211	1.85952	0.908423	0.546068	0.121311	0.634657	0.346738	0.587757	0.0527446
430	ALB_Y174	ALB	Y174	RHPYFYAPELL	2	0.775883	0.141006	0.516832	0.184105	0.47398	0.218616	0.694084	0.208598	1.12725	0.296696	1.38084	0.299642	0.476154	0.140961	1.18452	0.416344	12.7392	3.86615	10.8497	3.55328	0.563618	0.269258	0.762432	0.327478	0.621866	0.256554
431	ALB_Y174_Y174F	ALB	Y174	RHPYFFAPELL	1	1.29407	0.193911	0.600907	0.322636	0.597891	0.15249	1.19328	0.344695	1.3912	0.371918	1.21549	0.247064	0.541288	0.107753	1.3343	0.303756	16.3181	4.92698	13.8706	5.93966	0.723286	0.415386	0.61284	0.12493	0.557494	0.15592
432	ALB_Y174_Y174F_YF	ALB	Y174	RHPFFFAPELL	0	0.932054	0.399041	0.771152	0.497969	0.858907	0.253258	1.01821	0.295016	1.14864	0.499831	1.63912	0.788329	0.528614	0.0829809	1.71712	0.445967	0.619365	0.2982	1.64065	0.792383	0.947055	0.322823	0.842158	0.248683	0.726865	0.387425
433	ALB_Y174_YF	ALB	Y174	RHPFFYAPELL	1	1.04942	0.167915	1.31782	0.493952	0.732676	0.225489	1.11815	0.14885	1.97185	0.412006	1.60569	0.452417	1.06281	0.268612	1.98839	0.582637	1.24555	0.289837	0.968781	0.136511	1.17958	0.378498	1.03882	0.616725	0.839343	0.271767
434	ALB_Y287	ALB	Y287	ADLAKYICENQ	1	0.504588	0.0814936	0.460604	0.103728	0.626558	0.197541	0.830468	0.281368	1.09053	0.174858	0.979073	0.170703	0.459148	0.142967	1.12907	0.204019	0.485149	0.11366	0.78836	0.13811	0.671835	0.252556	0.629582	0.22167	0.386463	0.0601502
435	ALB_Y287_Q292R	ALB	Y287	ADLAKYICENR	1	0.466981	0.0448789	0.426507	0.103465	0.447314	0.0702181	1.36395	1.43917	0.92755	0.161739	0.840254	0.143731	0.498073	0.0398514	0.946263	0.162119	0.468896	0.147099	0.691426	0.176311	0.53652	0.174857	0.406142	0.11679	0.449591	0.0371959
436	ALB_Y343	ALB	Y343	DVCKNYAEAKD	1	0.549624	0.12679	0.508997	0.103281	0.570648	0.065598	0.803742	0.241391	1.14094	0.126291	1.07088	0.289326	0.49461	0.1176	1.19281	0.297619	0.569477	0.194359	0.701929	0.201032	0.541154	0.0658197	0.560946	0.0803137	0.44767	0.0648145
437	ALB_Y343_A344T	ALB	Y343	DVCKNYTEAKD	1	0.385111	0.0705377	0.497457	0.188815	0.493893	0.190741	0.549431	0.119418	0.712391	0.0552033	0.919599	0.0809937	0.511387	0.205081	0.962775	0.204113	0.510344	0.117229	0.613052	0.139417	0.554757	0.242091	0.581039	0.315816	0.499854	0.219533
438	ALB_Y343_D338G	ALB	Y343	GVCKNYAEAKD	1	0.391947	0.0205041	0.370604	0.137844	0.497643	0.151084	0.599868	0.130672	0.556189	0.164203	0.74862	0.249431	0.358875	0.0673699	0.729464	0.234004	0.550751	0.353823	0.584856	0.189659	0.469373	0.129032	0.511307	0.209975	0.385063	0.0642332
439	ALB_Y343_D338V	ALB	Y343	VVCKNYAEAKD	1	0.47716	0.0609975	0.511773	0.149239	0.51851	0.208723	0.785233	0.23881	0.875316	0.0444098	0.932385	0.201425	0.500335	0.0588116	1.10278	0.206377	0.482324	0.173911	0.692996	0.271853	0.514536	0.105565	0.580566	0.24325	0.456668	0.0680243
440	ALB_Y343_E345K	ALB	Y343	DVCKNYAKAKD	1	0.399788	0.0568177	0.42828	0.0966783	0.438577	0.0685323	0.632979	0.34077	0.606722	0.0845389	0.709967	0.119114	0.47266	0.0983264	0.626876	0.102557	0.409203	0.0947989	0.498232	0.0482042	0.468615	0.17707	0.535429	0.169961	0.509942	0.137238
441	ALB_Y343_N342K	ALB	Y343	DVCKKYAEAKD	1	0.530413	0.0610086	0.63912	0.313319	0.659499	0.347915	0.774628	0.137341	0.89746	0.0540107	1.23968	0.118707	0.545593	0.195816	1.229	0.295473	0.62686	0.17067	0.820629	0.203877	0.719885	0.288043	0.64604	0.175233	0.401879	0.0610779
442	ALB_Y377	ALB	Y377	RLAKTYETTLE	1	0.757904	0.0917252	0.751614	0.202992	0.621599	0.155496	0.954861	0.238657	1.09008	0.217048	0.860057	0.17068	0.721298	0.468944	1.3897	0.5025	0.710801	0.249861	0.894924	0.249341	0.5554	0.0640945	0.854762	0.305518	0.595823	0.08362
443	ALB_Y377_E378K	ALB	Y377	RLAKTYKTTLE	1	0.440862	0.100217	0.252878	0.111864	0.38781	0.184382	1.17893	1.33691	0.72046	0.447942	0.563789	0.299502	0.624324	0.220092	0.631744	0.263829	0.512969	0.176184	0.446358	0.109026	0.324174	0.129152	0.508562	0.161232	0.364742	0.0668479
444	ALB_Y377_E382K	ALB	Y377	RLAKTYETTLK	1	0.817443	0.251469	0.820099	0.45666	0.459066	0.114435	1.65402	1.01567	0.606989	0.30558	0.76774	0.382132	0.406018	0.28077	0.848267	0.200088	0.552729	0.19397	0.463418	0.282359	1.00071	0.844572	0.680685	0.195225	0.695428	0.328445
445	ALB_Y394	ALB	Y394	DPHECYAKVFD	1	0.665142	0.0753788	0.487569	0.0805587	0.581533	0.21529	0.692399	0.246806	0.879625	0.128115	1.11244	0.179854	0.583673	0.0856392	1.13564	0.128174	0.505871	0.154403	0.748734	0.0913456	0.593322	0.220003	0.591162	0.181537	0.41981	0.0351818
446	ALB_Y394_D389H	ALB	Y394	HPHECYAKVFD	1	0.658559	0.185616	0.622213	0.254046	0.654436	0.146529	1.00815	0.386265	1.30191	0.195143	1.15563	0.279814	0.624091	0.197625	1.35813	0.396144	0.636326	0.184023	0.844683	0.269078	0.641375	0.238746	0.440758	0.29582	0.763863	0.123104
447	ALB_Y394_D389V	ALB	Y394	VPHECYAKVFD	1	0.561085	0.110221	0.563734	0.218929	0.572087	0.264691	0.944786	0.315518	0.927797	0.0861848	1.07455	0.120823	0.542185	0.0762477	1.21676	0.186358	0.619467	0.141691	0.7275	0.262269	0.6472	0.161433	0.716153	0.231741	0.497302	0.0878402
448	ALB_Y394_D399N	ALB	Y394	DPHECYAKVFN	1	0.6238	0.144021	0.551745	0.17958	0.810105	0.315573	0.90989	0.48302	0.846747	0.120334	0.844011	0.139611	0.529352	0.0978591	0.951864	0.179881	0.589238	0.0707253	0.642748	0.135665	0.549291	0.150398	0.585872	0.22703	0.504268	0.0582912
449	ALB_Y394_K396E	ALB	Y394	DPHECYAEVFD	1	0.775328	0.146315	0.753121	0.390962	0.943961	0.259874	0.816985	0.286741	1.01433	0.163994	1.32358	0.268594	0.617065	0.316272	1.54556	0.517849	1.2008	0.523883	1.25469	0.297169	0.871328	0.479422	0.806644	0.315978	0.626402	0.150199
450	ALB_Y425	ALB	Y425	EQLGEYKFQNA	1	0.367361	0.0554844	0.393901	0.0999233	0.414506	0.0404928	0.774399	0.188069	0.715025	0.0811783	0.824068	0.0876392	0.351272	0.0333965	0.769996	0.084867	0.47099	0.151778	0.500059	0.0570961	0.461406	0.0834988	0.414689	0.217539	0.324083	0.0297974
451	ALB_Y425_E420K	ALB	Y425	KQLGEYKFQNA	1	0.3576	0.0702424	0.395431	0.0380426	0.375107	0.103817	0.399598	0.102278	0.525482	0.0943193	0.507239	0.123546	0.305522	0.059403	0.564515	0.132348	0.467539	0.0436176	0.417104	0.0639547	0.347507	0.0283163	0.38632	0.086829	0.398656	0.0507991
452	ALB_Y521	ALB	Y521	EVDETYVPKEF	1	0.595231	0.140799	0.516875	0.198934	0.66752	0.13897	0.88886	0.202639	1.18529	0.310641	1.21995	0.161775	0.604599	0.0789824	1.58451	0.317825	0.588728	0.133934	0.791181	0.161102	0.61323	0.0438792	0.639976	0.177248	0.490976	0.0628073
453	ALB_Y521_D518N	ALB	Y521	EVNETYVPKEF	1	0.522894	0.0916806	0.564052	0.217646	0.53392	0.14943	0.850813	0.250705	1.1846	0.126701	1.18968	0.193981	0.51849	0.108003	1.26031	0.199251	0.523918	0.0662092	0.795663	0.22953	0.584299	0.113051	0.543176	0.160339	0.476814	0.0346668
454	ALB_Y521_E525K	ALB	Y521	EVDETYVPKKF	1	0.40832	0.110416	0.453535	0.127795	0.445905	0.0985976	0.607158	0.168791	1.01189	0.421821	0.946599	0.212776	0.370962	0.0391417	0.951695	0.0654198	0.385038	0.0463472	0.518304	0.127211	0.685022	0.610541	0.372209	0.134274	0.403644	0.116415
455	ALCAM_Y298	ALCAM	Y298	RSSNTYTLTDV	1	1.58051	0.107539	1.59796	0.99442	0.950504	0.254079	0.668783	0.215767	0.805138	0.221386	0.766449	0.34842	1.03769	0.200367	0.920782	0.350057	0.519124	0.17575	0.70483	0.0862045	0.543808	0.112952	0.560662	0.409849	0.766076	0.179128
456	ALCAM_Y298_T301M	ALCAM	Y298	RSSNTYTLMDV	1	1.57951	0.309284	1.55322	0.850266	0.675697	0.207025	0.614377	0.171435	0.30874	0.145669	1.00881	0.460629	1.42163	0.502886	0.792942	0.279623	1.26378	0.670368	1.16892	0.813976	0.633131	0.235267	0.868207	0.252157	4.15135	1.38807
457	ALDH1A1_Y119	ALDH1A1	Y119	LYSNAYLNDLA	2	1.09998	0.25748	1.19151	0.62412	1.45429	0.741476	0.396121	0.0762931	0.666977	0.135047	0.830638	0.186018	4.02839	0.79226	0.913817	0.175402	0.48378	0.140694	0.776406	0.217876	0.853298	0.10542	0.684935	0.318965	5.81833	0.392904
458	ALDH1A1_Y119_N121S	ALDH1A1	Y119	LYSNAYLSDLA	2	1.95604	0.505793	3.57759	2.36681	3.50207	1.57348	0.618348	0.133827	0.9445	0.173087	1.68443	0.815359	7.25345	2.87464	1.01202	0.287158	1.13865	0.992071	1.23256	0.496043	2.99005	2.05335	1.44814	0.796654	8.43207	2.71975
459	ALDH1A1_Y119_N121S_YF	ALDH1A1	Y119	LFSNAYLSDLA	1	2.79455	1.8526	1.23299	0.689807	0.973838	0.290603	2.13979	0.643144	2.06434	0.32859	2.21437	1.28277	1.31447	0.804214	2.92356	0.802122	2.38713	1.68953	1.41905	0.617226	2.12108	1.18941	1.14796	0.474052	1.81136	0.683031
460	ALDH1A1_Y119_YF	ALDH1A1	Y119	LFSNAYLNDLA	1	1.15011	0.787681	1.12336	0.717982	1.00431	0.384429	1.13505	0.418039	1.11476	0.482454	1.14406	0.224444	0.687906	0.204022	1.585	0.481113	0.986298	0.396299	1.2508	0.530415	0.793626	0.39604	0.722769	0.081021	0.807001	0.283783
461	ALDH1A3_Y492	ALDH1A3	Y492	RELGEYALAEY	2	1.13731	0.31932	0.613628	0.261166	0.765396	0.319964	1.66579	0.707402	1.8151	0.533738	1.43788	0.400327	0.740288	0.310846	2.76322	2.56603	0.69399	0.790759	0.714142	0.381983	0.858307	0.240003	0.785278	0.26972	0.549992	0.409828
462	ALDH1A3_Y492_A493P	ALDH1A3	Y492	RELGEYPLAEY	2	0.492222	0.120302	0.581971	0.174621	0.504845	0.255233	1.17002	0.312643	1.97309	1.83204	0.981913	0.364137	0.593472	0.435921	1.41169	0.358502	0.687782	0.272585	0.685371	0.167786	0.484336	0.289479	0.495429	0.143708	0.515968	0.256006
463	ALDH1A3_Y492_A493P_YF	ALDH1A3	Y492	RELGEYPLAEF	1	0.582133	0.152261	0.635884	0.197035	0.536215	0.281684	0.752957	0.3474	1.40613	0.340189	1.17922	0.409306	0.484168	0.116466	1.14115	0.266683	0.709008	0.169636	0.741789	0.217612	0.510951	0.201143	0.645216	0.231006	0.613742	0.133394
464	ALDH1A3_Y492_YF	ALDH1A3	Y492	RELGEYALAEF	1	0.664724	0.0919466	0.770054	0.156327	0.660738	0.196697	0.849468	0.29487	0.820922	0.225612	1.28453	0.193366	0.699367	0.17777	1.05827	0.247957	0.725284	0.248859	0.783827	0.159793	0.857339	0.611457	0.696602	0.379559	0.478468	0.19094
465	ALDH1A3_Y497	ALDH1A3	Y497	YALAEYTEVKT	2	0.65823	0.158197	0.572199	0.284942	0.723582	0.386349	0.613536	0.0932325	0.812127	0.150538	1.29091	0.396085	1.31539	0.580213	0.901003	0.151655	1.72762	1.20975	1.25107	0.611066	0.651179	0.165478	0.718928	0.295419	0.652306	0.216564
466	ALDH1A3_Y497_A493P	ALDH1A3	Y497	YPLAEYTEVKT	2	0.444285	0.075122	0.433008	0.261636	0.53769	0.234886	0.606736	0.110067	0.721009	0.166984	1.10196	0.233811	0.515706	0.124222	0.946295	0.145861	1.09957	0.632435	0.824132	0.323952	0.562532	0.328535	0.642174	0.238905	0.326278	0.0378867
467	ALDH1A3_Y497_A493P_YF	ALDH1A3	Y497	FPLAEYTEVKT	1	0.527686	0.0721337	0.502323	0.135964	0.53968	0.0982484	0.708866	0.286766	1.00729	0.0731438	1.3443	0.476706	0.516084	0.0977891	0.967572	0.09897	0.670963	0.302754	0.82002	0.220605	0.685459	0.12053	0.575426	0.258705	0.399862	0.101896
468	ALDH1A3_Y497_YF	ALDH1A3	Y497	FALAEYTEVKT	1	0.621037	0.173939	0.718725	0.466608	0.635034	0.26785	0.756836	0.0998023	0.764795	0.0504432	1.03237	0.273439	0.566953	0.115569	1.10817	0.185789	0.893795	0.314821	0.903288	0.306151	0.58993	0.0669968	0.474583	0.155315	0.450275	0.122566
469	ALDH2_Y332	ALDH2	Y332	VQEDIYDEFVE	1	1.87014	0.268143	1.88971	0.13663	1.14794	0.277047	0.859379	0.292806	1.33966	0.0964174	1.20236	0.219797	0.657528	0.251131	1.30263	0.351921	0.458559	0.138805	0.730523	0.164827	0.728135	0.192307	0.71454	0.218781	0.542026	0.126476
470	ALDH2_Y332_E337V	ALDH2	Y332	VQEDIYDEFVV	1	3.56923	1.142	3.96478	0.862488	2.81415	0.39949	1.75525	0.983468	1.37432	0.392681	1.55189	0.150535	5.7703	2.28532	1.25271	0.123124	0.599216	0.131717	0.885511	0.483051	0.675746	0.180271	0.826684	0.259004	3.16833	2.08763
471	ALDH2_Y497	ALDH2	Y497	RELGEYGLQAY	2	0.695581	0.200055	0.822115	0.408759	0.823993	0.337621	0.961806	0.365044	1.3177	0.0738941	1.5477	0.248959	0.94878	0.302421	1.61259	0.451276	0.675697	0.0433127	0.977263	0.467372	0.699166	0.332501	0.75397	0.128927	0.562349	0.216252
472	ALDH2_Y497_E496K	ALDH2	Y497	RELGKYGLQAY	2	0.356192	0.127215	0.463753	0.220959	0.455348	0.166062	0.581366	0.130799	0.542602	0.124388	0.682682	0.185042	0.474516	0.199268	0.720193	0.136136	0.42565	0.194844	0.470226	0.147023	0.403235	0.0966785	0.402351	0.103832	0.456551	0.125411
473	ALDH2_Y497_E496K_YF	ALDH2	Y497	RELGKYGLQAF	1	0.491305	0.0716178	0.526454	0.0782337	0.583651	0.261663	0.785839	0.240809	0.774434	0.186411	1.00424	0.298925	0.536615	0.0537065	0.925507	0.309296	0.578284	0.101478	0.581911	0.273787	0.489192	0.193956	0.576774	0.265278	0.611511	0.137843
474	ALDH2_Y497_YF	ALDH2	Y497	RELGEYGLQAF	1	0.704432	0.19154	0.775394	0.324211	0.772191	0.124192	0.951253	0.286471	0.724194	0.347686	1.07455	0.203787	0.815977	0.337231	1.65725	0.535303	0.652983	0.108545	0.792657	0.17289	0.706734	0.346093	1.06829	0.544111	1.86895	1.98649
475	ALDH2_Y502	ALDH2	Y502	YGLQAYTEVKT	2	0.439429	0.06164	0.546228	0.12422	0.488139	0.18264	0.833694	0.240134	1.05988	0.0312365	1.27322	0.122492	0.703569	0.109504	1.28935	0.116486	0.589943	0.0714311	0.842487	0.176849	0.721228	0.251712	0.669878	0.355188	0.550495	0.171699
476	ALDH2_Y502_E504K	ALDH2	Y502	YGLQAYTKVKT	2	0.435073	0.1233	0.356801	0.0654969	0.376789	0.151077	0.613558	0.218102	1.22982	0.26862	1.26028	0.826414	0.427485	0.00675306	1.0847	0.240567	0.45027	0.111255	0.679475	0.105508	0.445213	0.119907	0.462333	0.251896	0.413859	0.0861374
477	ALDH2_Y502_E504K_YF	ALDH2	Y502	FGLQAYTKVKT	1	0.442407	0.0821173	0.546398	0.204176	0.513342	0.277773	0.798667	0.0650499	1.33181	0.188878	1.11904	0.267192	0.476477	0.126309	1.23041	0.158484	0.471923	0.191651	0.876912	0.323582	0.762829	0.330337	0.643921	0.271056	0.446766	0.100364
478	ALDH2_Y502_YF	ALDH2	Y502	FGLQAYTEVKT	1	0.414026	0.131832	0.497777	0.176879	0.656507	0.272459	0.726765	0.228352	1.12919	0.256131	1.02687	0.0840351	0.607672	0.144328	1.34519	0.156916	0.584246	0.199528	0.782988	0.332533	0.715121	0.430022	0.609171	0.129778	0.451934	0.131788
479	ALDH3A1_Y272	ALDH3A1	Y272	SLKEFYGEDAK	1	0.440382	0.0740317	0.510473	0.240732	0.500967	0.169811	0.561493	0.207426	0.903014	0.149608	0.928534	0.104554	0.587913	0.270365	1.07811	0.326738	0.471851	0.127012	0.691916	0.256387	0.434465	0.159529	0.472303	0.1688	0.387751	0.0782966
480	ALDH3A1_Y272_E270A	ALDH3A1	Y272	SLKAFYGEDAK	1	0.489008	0.12396	0.416277	0.137959	0.456469	0.131841	0.561952	0.122854	0.579663	0.0696751	0.602885	0.0838178	0.416533	0.0757445	0.724266	0.121883	0.432727	0.0402565	0.538454	0.114493	0.395037	0.0845504	0.368591	0.118953	0.331578	0.0941724
481	ALDH3A1_Y305	ALDH3A1	Y305	GQKVAYGGTGD	1	0.370877	0.0160855	0.348573	0.113066	0.386753	0.0836718	0.569402	0.238565	0.417393	0.0215184	0.581991	0.243742	0.384125	0.0682389	0.557694	0.104185	0.354017	0.0835706	0.415971	0.0471479	0.267978	0.0642432	0.342337	0.0428656	0.411527	0.142363
482	ALDH3A1_Y305_G309E	ALDH3A1	Y305	GQKVAYGGTED	1	0.41198	0.114278	0.437717	0.213736	0.40178	0.114316	0.57653	0.142058	0.790963	0.099652	0.747116	0.133308	0.343815	0.10968	0.938858	0.135339	0.411672	0.0951953	0.629549	0.200865	0.423911	0.077336	0.471043	0.149805	0.416603	0.0820005
483	ALDH3B2_Y362	ALDH3B2	Y362	LKEIHYPPYTD	2	0.916874	0.320644	0.717813	0.213587	0.929387	0.575095	0.763277	0.194975	1.01202	0.296034	1.17563	0.323282	0.583824	0.331484	1.17345	0.236111	0.644826	0.517224	0.825627	0.298711	0.734581	0.222912	0.74356	0.4011	0.57336	0.250044
484	ALDH3B2_Y362_H361R	ALDH3B2	Y362	LKEIRYPPYTD	2	0.493839	0.222138	0.309982	0.208417	0.677854	0.106602	0.749386	0.309182	0.827424	0.336661	0.760752	0.350829	0.541345	0.180882	1.06541	0.392442	0.538649	0.22421	0.702095	0.149341	0.347949	0.282251	0.588668	0.41204	0.518036	0.101208
485	ALDH3B2_Y362_H361R_YF	ALDH3B2	Y362	LKEIRYPPFTD	1	0.91869	0.23061	0.92571	0.564134	0.630313	0.389954	1.05616	0.412804	2.04948	0.685867	2.70633	2.62573	1.09452	0.433457	2.01235	0.344004	1.09336	0.510251	1.07491	0.495642	0.882708	0.312894	0.731094	0.21729	0.725176	0.232248
486	ALDH3B2_Y362_YF	ALDH3B2	Y362	LKEIHYPPFTD	1	0.401405	0.0565669	0.436899	0.139402	0.436957	0.164833	0.558513	0.098553	0.659382	0.172745	0.819047	0.156369	0.412536	0.0603236	0.899617	0.134179	0.473842	0.132969	0.555027	0.106202	0.424822	0.218113	0.541024	0.195703	0.329137	0.0393149
487	ALDH3B2_Y365	ALDH3B2	Y365	IHYPPYTDWNQ	2	0.573389	0.0497137	0.511502	0.246365	0.654749	0.232252	0.937616	0.766485	0.735828	0.153929	0.8894	0.229232	2.21232	0.57532	0.933224	0.220336	1.13857	0.516183	0.880758	0.26102	0.526799	0.123656	0.676124	0.299609	0.428559	0.134621
488	ALDH3B2_Y365_H361R	ALDH3B2	Y365	IRYPPYTDWNQ	2	0.417534	0.070389	0.467639	0.0915618	0.463768	0.19024	0.486836	0.0691701	0.675355	0.173312	0.781235	0.339684	0.567334	0.0750478	0.826149	0.190092	0.628354	0.178857	0.611779	0.140028	0.427968	0.137253	0.494479	0.278635	0.429356	0.0248564
489	ALDH3B2_Y365_H361R_YF	ALDH3B2	Y365	IRFPPYTDWNQ	1	0.327901	0.114793	0.395315	0.226042	0.439316	0.0805896	0.449978	0.115997	0.555481	0.0863784	0.741	0.267462	0.529657	0.235316	0.739044	0.230117	0.539504	0.140197	0.49339	0.126757	0.395957	0.0965421	0.392339	0.168234	0.420929	0.0737321
490	ALDH3B2_Y365_YF	ALDH3B2	Y365	IHFPPYTDWNQ	1	0.520149	0.121302	0.525826	0.200188	0.519174	0.148327	0.687193	0.110021	0.894498	0.107244	1.00701	0.16649	1.04126	0.185443	1.03362	0.155526	0.658989	0.0754056	0.68526	0.108077	0.695206	0.251674	0.52378	0.133447	0.431477	0.110689
491	ALDH5A1_Y175	ALDH5A1	Y175	EARRVYGDIIH	1	0.498741	0.0279474	0.513783	0.185305	0.419834	0.145174	0.596483	0.144833	0.516945	0.119982	0.607931	0.0781498	0.476822	0.06227	0.707386	0.108416	0.42604	0.0940658	0.447268	0.0989681	0.409554	0.049625	0.378269	0.0528408	0.407837	0.0341928
492	ALDH5A1_Y175_G176R	ALDH5A1	Y175	EARRVYRDIIH	1	0.410191	0.0201506	0.352293	0.0891732	0.325222	0.0672273	0.527974	0.113421	0.475294	0.0705378	0.548844	0.194978	0.304811	0.0856032	0.546519	0.195415	0.356753	0.060386	0.414517	0.0645976	0.317933	0.0583529	0.385666	0.0992333	0.402767	0.0664619
493	ALDH5A1_Y175_H180Y	ALDH5A1	Y175	EARRVYGDIIY	2	1.13819	0.244396	1.59313	0.574283	1.27352	0.897195	0.596561	0.145131	0.812902	0.146957	0.683462	0.150315	0.648089	0.14639	0.833937	0.105377	0.490851	0.143122	0.579036	0.171314	0.454567	0.163653	0.724886	0.633675	0.420322	0.0779482
494	ALDH5A1_Y175_H180Y_YF	ALDH5A1	Y175	EARRVYGDIIF	1	0.653789	0.0694158	0.634609	0.17479	0.509108	0.156552	0.637442	0.135091	0.71947	0.0956188	0.683498	0.0956536	0.493292	0.0703749	0.89654	0.125239	0.505357	0.073962	0.577742	0.121601	0.400349	0.0496111	0.447777	0.169716	0.53567	0.185124
495	ALDOA_Y138	ALDOA	Y138	ERCAQYKKDGA	1	0.391138	0.0766382	0.394172	0.0997745	0.396414	0.08106	0.496442	0.0720581	0.62247	0.248724	0.611502	0.10512	0.341041	0.0757019	0.574465	0.149506	0.438422	0.0587939	0.483646	0.0820869	0.408591	0.0691439	0.487357	0.158332	0.367574	0.088972
496	ALDOA_Y138_G142V	ALDOA	Y138	ERCAQYKKDVA	1	0.491432	0.0290492	0.595692	0.238388	0.525062	0.0771167	0.624468	0.161824	0.649961	0.170573	0.725704	0.128726	0.449773	0.18442	1.04686	0.643678	0.579365	0.221804	0.60396	0.166557	0.527445	0.161502	0.606814	0.0282793	0.384892	0.0538403
497	ALDOA_Y204	ALDOA	Y204	LKRCQYVTEKV	1	0.795957	0.0985679	0.822881	0.304257	0.688664	0.1277	1.24067	0.103024	2.26007	1.48549	1.58767	0.810257	0.794467	0.581112	1.7482	0.984368	1.10776	0.304963	0.924181	0.283728	1.90086	2.34533	0.890357	0.360038	0.671798	0.221905
498	ALDOA_Y204_E207K	ALDOA	Y204	LKRCQYVTKKV	1	0.54466	0.105682	0.805537	0.265401	0.370862	0.0709016	0.605072	0.437453	0.75237	0.198229	1.00245	0.308172	0.581584	0.373777	0.821217	0.319369	0.807213	0.2446	0.548018	0.236696	0.432283	0.191445	0.50591	0.213961	0.535363	0.0910095
499	ALDOA_Y343	ALDOA	Y343	ACQGKYTPSGQ	1	0.463435	0.077671	0.479068	0.136924	0.460162	0.052354	0.693062	0.144163	0.851063	0.175751	0.597556	0.124101	0.530786	0.267846	0.742175	0.136076	0.406416	0.12512	0.734359	0.372874	0.413851	0.0996867	0.401851	0.0763087	0.377637	0.0882998
500	ALDOA_Y343_C339Y	ALDOA	Y343	AYQGKYTPSGQ	2	0.350329	0.111209	0.262243	0.0837781	0.309101	0.075405	0.384152	0.0426347	0.54457	0.321955	0.382895	0.065227	0.344757	0.0378027	0.44149	0.0857506	0.315849	0.0632921	0.374623	0.0580729	0.387787	0.0688777	0.298883	0.0798559	0.337416	0.0450885
501	ALDOA_Y343_C339Y_YF	ALDOA	Y343	AFQGKYTPSGQ	1	0.297816	0.0944583	0.273079	0.0398283	0.265837	0.0765142	0.43222	0.120776	0.547121	0.125091	0.387851	0.0419155	0.253101	0.0622454	0.445908	0.0806161	0.3088	0.0343242	0.327574	0.0628035	0.376055	0.0510627	0.276126	0.0170936	0.346362	0.104498
502	ALDOA_Y343_G347S	ALDOA	Y343	ACQGKYTPSSQ	1	0.448899	0.0511834	0.4329	0.0870384	0.41661	0.12081	0.392086	0.0815844	0.421352	0.193923	0.541699	0.182947	0.425074	0.0548174	0.579074	0.177402	0.362043	0.0947784	0.46633	0.0276152	0.346226	0.0818399	0.388667	0.0597903	0.403652	0.0597595
503	ALDOB_Y204	ALDOB	Y204	LEHCQYVTEKV	1	0.821682	0.43353	1.5862	1.20726	0.839425	0.428763	1.18296	0.30323	1.67628	0.137765	1.83362	1.1468	1.90818	1.30376	2.84831	1.86981	1.59572	0.718997	1.91267	1.52122	1.74405	1.54766	1.55007	1.40151	1.0376	0.393947
504	ALDOB_Y204_E207Q	ALDOB	Y204	LEHCQYVTQKV	1	0.617155	0.231162	0.469946	0.269686	0.506586	0.213605	0.726637	0.201449	1.02798	0.122991	1.00941	0.272713	0.648167	0.225303	1.04122	0.162967	0.655574	0.265475	0.762934	0.244296	0.817588	0.41214	0.924436	0.424467	0.400601	0.183058
505	ALDOB_Y223	ALDOB	Y223	NDHHVYLEGTL	1	0.421409	0.025307	0.468336	0.122308	0.530332	0.119179	0.555031	0.0774503	0.661774	0.0780471	0.71819	0.0825873	0.459591	0.0660282	0.755587	0.192249	0.493763	0.104876	0.577539	0.171143	0.493782	0.147852	0.509102	0.184165	0.43516	0.080664
506	ALDOB_Y223_V222F	ALDOB	Y223	NDHHFYLEGTL	1	0.391901	0.045871	0.397581	0.203284	0.4302	0.127464	0.646406	0.0532084	0.963829	0.0556844	0.938818	0.106441	0.497571	0.163967	1.1931	0.485939	0.488916	0.0976028	0.696394	0.250568	0.496575	0.164523	0.547356	0.198229	0.408994	0.100724
507	ALDOB_Y302	ALDOB	Y302	KLSFSYGRALQ	1	0.41699	0.064372	0.38792	0.179698	0.459749	0.108268	0.69394	0.204566	0.847165	0.23682	0.899925	0.0765656	0.41273	0.0552317	0.993753	0.0608362	0.519013	0.130148	0.641994	0.156337	0.548342	0.15844	0.48312	0.187282	0.406759	0.0543699
508	ALDOB_Y302_R304Q	ALDOB	Y302	KLSFSYGQALQ	1	0.410321	0.0559267	0.421554	0.196127	0.382873	0.192468	0.685841	0.159734	1.03056	0.127377	1.00445	0.163244	0.529308	0.128661	1.09951	0.186079	0.503295	0.0932074	0.719602	0.229843	0.648858	0.223296	0.564308	0.159007	0.437152	0.0982
509	ALDOB_Y302_R304W	ALDOB	Y302	KLSFSYGWALQ	1	0.584701	0.089171	0.503193	0.169033	0.508504	0.191189	1.18625	0.414753	1.71502	0.223293	1.51641	0.290268	0.59105	0.137091	1.79554	0.445083	0.675859	0.279896	0.936166	0.288333	0.843849	0.153442	0.764236	0.157985	0.558606	0.041826
510	ALK_Y1092	ALK	Y1092	TIMTDYNPNYC	2	0.551539	0.0444621	0.438656	0.0581141	0.660117	0.196646	0.922624	0.270137	1.23505	0.19774	1.33011	0.270032	0.547864	0.141876	1.26233	0.293802	0.715231	0.232786	0.904058	0.230806	0.998989	0.736615	0.530644	0.263345	0.600376	0.277667
511	ALK_Y1092_D1091N	ALK	Y1092	TIMTNYNPNYC	2	0.450362	0.106102	0.565032	0.189767	0.548368	0.121631	0.557756	0.191076	0.639361	0.200743	0.758142	0.157152	0.460121	0.0677655	0.900741	0.144816	0.544822	0.194746	0.548682	0.135438	0.619433	0.329792	0.500242	0.241916	0.406725	0.0466193
512	ALK_Y1092_D1091N_YF	ALK	Y1092	TIMTNYNPNFC	1	0.533452	0.0425692	0.545386	0.203039	0.499982	0.100128	0.715691	0.245541	0.864691	0.241152	0.987158	0.173436	0.51249	0.202491	1.06426	0.342518	0.575988	0.135394	0.693917	0.0966829	0.43041	0.122019	0.783647	0.36235	0.485065	0.121901
513	ALK_Y1092_YF	ALK	Y1092	TIMTDYNPNFC	1	0.544759	0.113812	0.499262	0.13467	0.470453	0.0910544	0.783482	0.193304	0.795093	0.199169	0.857981	0.190111	0.373036	0.253337	0.916664	0.344331	0.533458	0.171753	0.549055	0.114518	0.498049	0.153405	0.491479	0.167484	0.395264	0.124584
514	ALK_Y1096	ALK	Y1096	DYNPNYCFAGK	2	0.630249	0.156724	0.606544	0.199179	0.56267	0.234715	0.812002	0.311211	0.873115	0.130845	1.82476	0.41699	0.735236	0.139476	1.03268	0.176915	0.64123	0.131416	0.777565	0.274245	2.62164	0.568506	1.06976	0.185017	0.906247	0.183866
515	ALK_Y1096_D1091N	ALK	Y1096	NYNPNYCFAGK	2	0.564184	0.123049	0.570334	0.129108	0.432746	0.0816748	0.803206	0.113903	0.85628	0.191872	1.26135	0.0668552	0.597199	0.129066	0.879038	0.195822	0.563175	0.129716	0.641535	0.10773	3.98459	0.379961	1.2733	0.128194	1.09937	0.211418
516	ALK_Y1096_D1091N_YF	ALK	Y1096	NFNPNYCFAGK	1	0.472053	0.0760065	0.611501	0.178039	0.651302	0.133151	0.617178	0.0816144	0.743617	0.107499	1.24499	0.394207	0.705879	0.03822	0.82078	0.210028	0.548086	0.114477	0.666052	0.136692	2.5652	0.328917	1.01152	0.275593	0.845753	0.184826
517	ALK_Y1096_YF	ALK	Y1096	DFNPNYCFAGK	1	0.683904	0.122941	0.54938	0.160115	0.444349	0.159095	0.921468	0.187665	1.20875	0.128443	1.66478	0.481165	0.741929	0.146271	1.27968	0.417358	0.74245	0.396101	0.887488	0.232652	1.71912	0.251919	0.988636	0.326949	1.04163	0.100242
518	ALK_Y1131	ALK	Y1131	AFGEVYEGQVS	1	1.54499	0.417265	0.772087	0.21633	0.93678	0.409881	0.764042	0.343457	0.846412	0.179228	0.974076	0.202574	0.459023	0.0590127	1.10659	0.120724	0.695104	0.110706	0.667416	0.106512	0.539437	0.253223	0.640496	0.507551	0.441781	0.0606724
519	ALK_Y1131_G1128A	ALK	Y1131	AFAEVYEGQVS	1	1.21217	0.173934	0.56267	0.206203	0.796068	0.296479	0.868098	0.12294	1.08729	0.222486	1.06955	0.195327	0.517848	0.135008	0.973712	0.19381	0.414438	0.117698	0.694863	0.253843	0.55873	0.0615485	0.504235	0.209006	0.484389	0.0841485
520	ALK_Y1131_V1135E	ALK	Y1131	AFGEVYEGQES	1	0.750054	0.128881	0.597643	0.155422	0.629364	0.147264	0.842458	0.134627	1.14446	0.202455	1.32547	0.433277	0.477713	0.0795194	1.05146	0.129407	0.485223	0.0653882	0.644944	0.127865	0.525677	0.136924	0.622166	0.161567	0.438411	0.0226047
521	ALK_Y1278	ALK	Y1278	MARDIYRASYY	3	1.5816	0.241784	0.687711	0.22974	1.01013	0.387369	1.77099	1.02668	0.702487	0.125658	0.685085	0.192602	0.407584	0.0618203	0.683186	0.105665	0.624447	0.10757	0.629704	0.0768665	0.466465	0.0560561	0.438773	0.0513646	0.672587	0.0391555
522	ALK_Y1278_A1274T	ALK	Y1278	MTRDIYRASYY	3	1.66296	0.172362	0.888324	0.294912	1.17355	0.559736	2.41464	1.46342	0.629504	0.10924	0.725405	0.30804	0.462146	0.106618	0.702033	0.137248	0.843608	0.357894	0.675896	0.139084	0.597706	0.0843781	0.578596	0.136062	0.827488	0.150993
523	ALK_Y1278_A1274T_YF	ALK	Y1278	MTRDIYRASFF	1	0.592025	0.0816727	0.587309	0.234296	0.889519	0.29009	4.14582	2.42746	0.621155	0.0459325	0.657107	0.0543614	0.385743	0.0323339	0.729847	0.060528	0.572016	0.240677	0.676806	0.189296	0.519008	0.0978575	0.462309	0.12911	0.463583	0.0566123
524	ALK_Y1278_R1275L	ALK	Y1278	MALDIYRASYY	3	1.75943	0.103499	0.973511	0.448564	1.57251	0.812925	2.98908	2.42857	0.860386	0.126022	0.873861	0.175844	0.434263	0.134753	0.910552	0.254813	0.655499	0.166588	0.713134	0.108135	0.59435	0.229846	0.56424	0.192027	0.673579	0.214952
525	ALK_Y1278_R1275L_YF	ALK	Y1278	MALDIYRASFF	1	1.05176	0.169114	1.05597	0.499252	1.21895	0.626684	4.87954	3.4704	0.715156	0.0412625	0.935768	0.164861	0.59852	0.103253	0.952553	0.0843919	0.55786	0.0809219	0.767057	0.25452	0.598792	0.219124	0.584213	0.117094	0.775751	0.158492
526	ALK_Y1278_R1275Q	ALK	Y1278	MAQDIYRASYY	3	3.15342	0.166708	1.62005	0.817464	2.54298	0.945313	7.44698	5.93955	0.610496	0.161275	0.662495	0.124774	0.450932	0.0293808	0.764957	0.126087	0.785673	0.085846	0.653457	0.106287	0.575832	0.0220885	0.53021	0.149173	0.790747	0.172106
527	ALK_Y1278_R1275Q_YF	ALK	Y1278	MAQDIYRASFF	1	2.28125	0.242689	1.52314	0.850403	2.05526	0.654929	12.2093	7.1387	0.711314	0.0795339	0.68325	0.148704	0.446331	0.0332335	0.690238	0.0666171	0.462293	0.0518483	0.481859	0.116438	0.353267	0.117314	0.499232	0.0888585	0.659628	0.256612
528	ALK_Y1278_Y1278S	ALK	Y1278	MARDISRASYY	2	0.46321	0.0567342	0.474987	0.115376	0.395397	0.164866	0.590201	0.108885	0.649779	0.324019	0.524886	0.172089	0.329606	0.106902	0.730476	0.194151	0.463981	0.150583	0.451624	0.102183	0.421712	0.0871623	0.395036	0.127518	0.453107	0.0729513
529	ALK_Y1278_Y1278S_YF	ALK	Y1278	MARDISRASFF	0	0.395616	0.0669859	0.44261	0.063463	0.384032	0.0400346	0.545239	0.117541	0.530213	0.0445319	0.625781	0.314069	0.392233	0.0349881	0.682386	0.114613	0.409746	0.0777989	0.473354	0.0914314	0.463113	0.130276	0.466624	0.220101	0.431599	0.0299068
530	ALK_Y1278_YF	ALK	Y1278	MARDIYRASFF	1	0.597489	0.104148	0.56607	0.140599	0.661263	0.203299	3.09577	2.18075	0.608198	0.223317	0.669925	0.0939755	0.375291	0.0896033	0.796541	0.176815	0.43477	0.0980953	0.448927	0.0264963	0.424586	0.0580067	0.433544	0.0837431	0.472332	0.0806775
531	ALK_Y1282	ALK	Y1282	IYRASYYRKGG	3	0.557278	0.123338	0.513075	0.201819	0.475586	0.0778863	0.676058	0.202071	0.752537	0.0785988	0.614805	0.18443	0.450496	0.105355	0.621848	0.33602	0.414474	0.0642346	0.402718	0.102659	0.418926	0.0494813	0.481037	0.16021	0.621198	0.149295
532	ALK_Y1282_Y1278S	ALK	Y1282	ISRASYYRKGG	2	0.509012	0.105981	0.510816	0.159146	0.496026	0.124855	0.568571	0.0484406	0.509955	0.18664	0.588139	0.206628	0.47271	0.0664176	0.701072	0.269168	0.408616	0.149241	0.532081	0.12612	0.426525	0.13375	0.427589	0.188833	0.576404	0.0358151
533	ALK_Y1282_Y1278S_YF	ALK	Y1282	ISRASYFRKGG	1	0.505702	0.110543	0.418529	0.126705	0.435287	0.0860553	0.596914	0.104396	0.590191	0.175683	0.664392	0.258074	0.456075	0.127826	0.724281	0.304758	0.340821	0.0881615	0.387948	0.0957083	0.399554	0.0824278	0.369553	0.145958	0.468609	0.0869654
534	ALK_Y1282_YF	ALK	Y1282	IFRASYFRKGG	1	0.687534	0.133348	0.61916	0.189273	0.674438	0.261418	0.721078	0.168783	1.11409	0.388077	1.02068	0.331645	0.580742	0.219	0.898986	0.323686	0.518298	0.102411	0.624627	0.163643	0.549868	0.154661	0.621333	0.114487	0.706228	0.249323
535	ALK_Y1283	ALK	Y1283	YRASYYRKGGC	3	0.552277	0.0930325	0.484606	0.0787898	0.487735	0.041318	0.653428	0.147817	0.678028	0.408562	0.808203	0.239464	0.63581	0.383052	0.677444	0.211811	0.513628	0.129204	0.512626	0.0982427	0.570296	0.152132	0.434519	0.151785	0.561111	0.173983
536	ALK_Y1283_Y1278S	ALK	Y1283	SRASYYRKGGC	2	0.51972	0.114651	0.379966	0.0506615	0.369992	0.0710929	0.584662	0.162333	0.641325	0.439755	0.522192	0.166611	0.325574	0.072005	0.499735	0.101309	0.413751	0.0745547	0.334641	0.0739061	0.339765	0.0579316	0.370581	0.0960671	0.427876	0.0971584
537	ALK_Y1283_Y1278S_YF	ALK	Y1283	SRASFYRKGGC	1	0.574626	0.113028	0.432505	0.097425	0.477357	0.0896426	0.52928	0.174885	0.614905	0.227085	0.702151	0.177393	0.475993	0.164777	0.626936	0.136421	0.381411	0.0564833	0.495832	0.0823525	0.43094	0.0982325	0.467439	0.0541919	0.567419	0.139028
538	ALK_Y1283_YF	ALK	Y1283	FRASFYRKGGC	1	0.58569	0.0864421	0.618293	0.254882	0.477221	0.0940769	0.663231	0.115177	0.683281	0.351685	0.866492	0.205911	0.466003	0.130238	0.902356	0.196139	0.531499	0.15051	0.532332	0.0662045	0.459319	0.0455299	0.527384	0.144881	0.578868	0.0829052
539	ALK_Y1604	ALK	Y1604	PGAGHYEDTIL	1	0.390778	0.205978	0.809209	0.460171	0.786207	0.331075	0.765355	0.282717	0.896093	0.348544	1.14586	0.375717	6.12066	3.44893	1.15686	0.473983	0.663967	0.106283	0.88097	0.251949	0.871171	0.598437	0.597056	0.27922	0.597002	0.112386
540	ALK_Y1604_P1599H	ALK	Y1604	HGAGHYEDTIL	1	0.752251	0.323307	0.734317	0.137273	0.724088	0.394249	0.958261	0.214484	1.00055	0.39962	1.26208	0.456875	4.6382	1.37608	1.16961	0.187409	0.786798	0.261618	0.978156	0.750836	0.828987	0.159926	0.651595	0.202724	0.682368	0.0891639
541	ALOX12_Y295	ALOX12	Y295	RGEKQYLAAPL	1	0.505246	0.0826605	0.435599	0.255637	0.545118	0.19898	0.503677	0.386608	0.523112	0.220059	0.776872	0.285741	0.364535	0.122704	0.415517	0.0943751	0.753627	0.866592	0.340589	0.136647	0.40164	0.520612	0.460853	0.178296	0.377182	0.167813
542	ALOX12_Y295_A298T	ALOX12	Y295	RGEKQYLATPL	1	0.812336	0.0319854	0.664677	0.308043	0.483535	0.212902	1.02441	0.393862	0.931122	0.0609774	0.860623	0.518642	0.570729	0.0891356	1.00612	0.274965	1.05805	0.45776	0.711405	0.575626	0.597717	0.316419	0.34203	0.155783	0.530066	0.248323
543	ALOX12B_Y318	ALOX12B	Y318	IYLADYRIMEG	2	1.1587	0.157804	0.737989	0.275824	0.811719	0.358445	0.978304	0.204716	1.03532	0.122943	1.13741	0.216682	0.480043	0.0863213	1.10179	0.297949	2.63436	1.26246	2.45835	1.83722	1.262	0.388095	1.07116	0.531923	3.74453	0.406998
544	ALOX12B_Y318_Y318C	ALOX12B	Y318	IYLADCRIMEG	1	0.559122	0.0189151	0.684291	0.173466	0.690789	0.376057	0.869194	0.207434	0.950121	0.164933	1.26643	0.156173	0.649612	0.25597	1.36173	0.47975	0.648058	0.225894	0.841915	0.263612	0.692797	0.31216	0.932363	0.392931	0.555928	0.163985
545	ALOX12B_Y318_Y318C_YF	ALOX12B	Y318	IFLADCRIMEG	0	0.524622	0.0307851	0.578999	0.307647	0.662084	0.191595	0.894435	0.296162	1.19989	0.151242	1.32612	0.256926	0.593507	0.0723464	1.47734	0.303805	0.654056	0.139702	1.0254	0.404313	0.803113	0.340269	0.663741	0.137518	0.500304	0.156489
546	ALOX12B_Y318_YF	ALOX12B	Y318	IFLADYRIMEG	1	0.527744	0.10346	0.408345	0.216683	0.420884	0.175201	0.640755	0.122903	0.782295	0.19298	0.688784	0.177367	0.452522	0.082864	0.983995	0.172389	0.814209	0.375533	0.786937	0.14079	0.454315	0.104969	0.523372	0.0892856	0.477858	0.0722944
547	ALOX5_Y446	ALOX5	Y446	MKDLTYASLCF	1	5.59084	1.58323	6.74786	1.66817	5.35025	0.9971	1.78305	1.11064	1.01199	0.102057	1.09072	0.10444	1.70833	0.164175	1.33148	0.197956	0.90078	0.31865	0.945537	0.199339	2.65057	0.514733	2.06943	0.578577	3.15012	0.727904
548	ALOX5_Y446_A447S	ALOX5	Y446	MKDLTYSSLCF	1	5.90735	0.936794	6.62097	1.65302	6.77657	2.15321	1.52699	0.410761	1.21112	0.207403	1.47965	0.204819	3.84275	0.500487	1.35193	0.219218	0.997292	0.217225	1.13563	0.172614	2.89305	0.651137	2.67366	0.816586	4.9143	0.399097
549	ALPK2_Y1975	ALPK2	Y1975	LIQRNYKLAAQ	1	0.490488	0.231572	0.570762	0.251154	0.833469	0.314809	0.77325	0.228058	0.440183	0.0931473	1.18744	1.43792	0.576135	0.224587	1.20837	0.765824	0.937206	0.450532	0.961804	0.489716	1.12985	1.16749	0.603557	0.205798	0.720419	0.455894
550	ALPK2_Y1975_A1978T	ALPK2	Y1975	LIQRNYKLTAQ	1	0.706353	0.272264	0.461596	0.149448	0.507271	0.305066	1.1951	0.528069	1.24371	0.152149	0.860413	0.383722	0.392968	0.19999	1.12333	0.468937	0.465223	0.292824	0.510675	0.249488	0.479032	0.24286	0.604343	0.145983	0.567476	0.222822
551	ALPK3_Y342	ALPK3	Y342	HTLQLYRCREE	1	0.602587	0.144716	0.57337	0.399608	0.522298	0.212618	0.328704	0.138495	0.57357	0.354314	0.95282	0.549964	0.574546	0.286812	1.03407	0.615121	0.897536	0.315245	0.699689	0.167906	0.498685	0.304324	0.587766	0.526589	0.606676	0.147572
552	ALPK3_Y342_T338I	ALPK3	Y342	HILQLYRCREE	1	0.576662	0.103405	0.650395	0.498706	0.55326	0.0927296	0.422919	0.221339	0.708661	0.482197	0.945288	0.451635	0.556184	0.216416	1.04872	0.53575	0.763064	0.421446	0.870934	0.445316	0.924064	0.587082	0.704565	0.562167	0.515461	0.274964
553	ALPL_Y117	ALPL	Y117	GTATAYLCGVK	1	0.427244	0.105975	0.472409	0.182559	0.501111	0.0360011	0.666502	0.111522	0.890455	0.171415	0.755719	0.0916265	0.462556	0.0690869	1.06914	0.296341	0.485163	0.128132	0.595318	0.2318	0.512433	0.179534	0.507431	0.187788	0.352257	0.0695331
554	ALPL_Y117_A114G	ALPL	Y117	GTGTAYLCGVK	1	0.347578	0.109041	0.434934	0.0525081	0.39484	0.105744	0.685313	0.207403	0.675406	0.092021	0.694051	0.0627254	0.511373	0.139052	0.753723	0.146825	0.446117	0.0673307	0.48893	0.201335	0.550686	0.169439	0.41179	0.172552	0.379349	0.0169936
555	ALPL_Y117_A116T	ALPL	Y117	GTATTYLCGVK	1	0.472407	0.0524605	0.479139	0.146912	0.582089	0.164602	0.8106	0.121638	0.946177	0.186845	0.914194	0.101877	0.494764	0.0934505	1.12588	0.161064	0.595179	0.0698631	0.757842	0.162698	0.500426	0.141179	0.800444	0.425444	0.49287	0.0930899
556	ALPL_Y117_G120R	ALPL	Y117	GTATAYLCRVK	1	0.398828	0.102794	0.404101	0.157718	0.388716	0.0575587	0.595442	0.112336	0.577843	0.0446794	0.677684	0.192461	0.516639	0.207557	0.803621	0.0457146	0.471268	0.0612897	0.514061	0.172494	0.479525	0.0438522	0.506065	0.189116	0.363053	0.0623433
557	ALX3_Y181	ALX3	Y181	HYPDVYAREQL	2	0.708791	0.218407	0.905821	0.488211	1.13527	0.864974	0.510588	0.237064	0.892373	0.263887	0.481315	0.183233	0.360388	0.149305	0.912404	0.231028	0.651269	0.179451	0.58027	0.117565	0.517951	0.218514	0.513342	0.161583	0.494233	0.271179
558	ALX3_Y181_R183W	ALX3	Y181	HYPDVYAWEQL	2	5.25408	1.08048	8.68936	1.74063	4.12042	0.38571	0.404488	0.171695	0.847315	0.178009	1.13846	0.602619	13.2417	4.98214	1.31543	0.435103	1.18778	0.371881	1.16051	0.544334	0.913142	0.471995	0.865082	0.280375	3.26835	1.45959
559	ALX3_Y181_R183W_YF	ALX3	Y181	HFPDVYAWEQL	1	5.24957	0.659468	7.03279	1.86711	3.05546	0.688801	0.63188	0.256662	0.892893	0.101806	1.20155	0.557321	11.3267	4.44208	1.45749	0.475946	0.616218	0.249011	0.674017	0.093921	0.921564	0.55718	0.935078	0.422687	2.24662	0.64284
560	ALX3_Y181_YF	ALX3	Y181	HFPDVYAREQL	1	0.909942	0.336042	0.588121	0.157336	0.722147	0.480881	0.666834	0.35636	0.616202	0.0930758	0.713145	0.0988084	0.560961	0.0939851	1.04078	0.405139	0.550191	0.271773	0.514355	0.274851	0.618896	0.146938	0.702586	0.189379	0.408037	0.0152825
561	AMH_Y195	AMH	Y195	SRDTRYLVLAV	1	0.51402	0.134706	0.491932	0.117552	0.475667	0.110577	0.73925	0.175692	0.908763	0.187784	0.930191	0.344513	0.552407	0.115636	1.09934	0.100664	0.542629	0.0880445	0.682988	0.144445	0.636286	0.122048	0.559198	0.225173	0.486751	0.146057
562	AMH_Y195_R194C	AMH	Y195	SRDTCYLVLAV	1	0.666471	0.120365	0.555269	0.145402	0.650578	0.172955	1.05745	0.246455	1.39934	0.376704	1.51789	0.241717	0.620214	0.0725527	1.47782	0.266112	0.786481	0.129996	1.11929	0.248299	0.718841	0.203947	0.684436	0.177238	0.552266	0.137036
563	AMZ2_Y26	AMZ2	Y26	VLVSQYEKLNA	1	0.389184	0.0736961	0.438048	0.0671959	0.46718	0.181656	0.578444	0.0322217	0.638482	0.200757	0.619436	0.172002	0.417457	0.0333456	0.732188	0.107759	0.362217	0.0214301	0.548033	0.161667	0.523869	0.180044	0.3409	0.0793811	0.434363	0.189341
564	AMZ2_Y26_N30D	AMZ2	Y26	VLVSQYEKLDA	1	0.539073	0.225014	0.488895	0.246823	0.484093	0.13788	0.585805	0.0297288	0.738125	0.110224	0.807715	0.24642	0.469708	0.119913	0.826477	0.201177	0.365841	0.0509277	0.589178	0.120219	0.561138	0.0299216	0.606237	0.126593	0.462016	0.0870407
565	ANAPC4_Y469	ANAPC4	Y469	NRKGKYFNVER	1	0.487276	0.05775	0.385773	0.151982	0.694811	0.589622	0.631202	0.105061	0.379323	0.111835	0.47834	0.271403	0.350576	0.102227	0.574551	0.126103	0.472556	0.264464	0.451214	0.118307	0.367192	0.223352	0.448263	0.16621	0.410956	0.150581
566	ANAPC4_Y469_R465Q	ANAPC4	Y469	NQKGKYFNVER	1	0.386337	0.0662377	0.462208	0.153958	0.448741	0.0440708	0.587651	0.2085	0.489255	0.0927407	0.613986	0.183599	0.389615	0.0330491	0.603265	0.264271	0.360611	0.0853992	0.469106	0.0751002	0.353025	0.0923952	0.371608	0.0488606	0.373442	0.0636357
567	ANG_Y38	ANG	Y38	FLTQHYDAKPQ	1	0.60907	0.120211	0.583414	0.151454	0.6703	0.0888688	0.613059	0.171044	0.869433	0.148815	0.73221	0.148423	0.657872	0.123541	0.74097	0.128061	1.14235	0.961396	0.580381	0.0926446	0.63707	0.14002	0.581407	0.060554	0.557194	0.00549638
568	ANG_Y38_K41E	ANG	Y38	FLTQHYDAEPQ	1	0.600666	0.209408	0.477994	0.138765	0.534281	0.117502	0.785338	0.243082	0.627203	0.108438	0.853315	0.229159	0.511483	0.0587046	0.98851	0.136445	0.582865	0.0596158	0.683754	0.0964203	0.41332	0.0887501	0.554032	0.16902	0.501662	0.143445
569	ANG_Y38_K41I	ANG	Y38	FLTQHYDAIPQ	1	0.677769	0.115943	0.585649	0.310148	2.88403	1.6657	0.610984	0.102982	0.607602	0.0736439	0.884719	0.234238	9.8596	2.75643	0.854665	0.18696	0.639153	0.244409	0.866372	0.585348	0.71473	0.243108	0.509943	0.285938	2.45601	0.969347
570	ANG_Y38_Q36L	ANG	Y38	FLTLHYDAKPQ	1	0.312357	0.0601586	0.449278	0.201348	0.462288	0.21942	0.5013	0.0973049	0.669411	0.145624	0.911849	0.129427	0.32782	0.0641424	0.982811	0.189663	0.531592	0.334915	0.575366	0.130309	0.504603	0.337711	0.425733	0.173002	0.300713	0.0574562
571	ANG_Y38_Y38H	ANG	Y38	FLTQHHDAKPQ	0	0.396436	0.0730131	0.279332	0.0611314	0.352519	0.186536	0.551544	0.103014	0.464125	0.0139347	0.496847	0.0751548	0.468485	0.208523	0.741658	0.229465	0.446635	0.0520331	0.450569	0.143089	0.329539	0.174069	0.381457	0.038116	0.439581	0.0626163
572	ANGPTL3_Y417	ANGPTL3	Y417	NLNGKYNKPRA	1	0.333616	0.116868	0.658689	0.631039	0.362242	0.17366	0.696004	0.244138	0.800251	0.499781	0.509577	0.218747	0.372208	0.258841	0.612842	0.334699	0.344272	0.223151	0.525042	0.455888	0.293799	0.190647	0.352872	0.0548518	0.471247	0.143038
573	ANGPTL3_Y417_N418Y	ANGPTL3	Y417	NLNGKYYKPRA	2	0.406192	0.100035	0.240515	0.0590276	0.312401	0.139642	0.609522	0.12574	0.616583	0.052515	0.473586	0.140514	0.353872	0.0512387	0.570487	0.184363	0.407967	0.158994	0.444762	0.178872	0.403909	0.211448	0.324155	0.0631843	0.30352	0.0298727
574	ANGPTL3_Y417_N418Y_YF	ANGPTL3	Y417	NLNGKYFKPRA	1	0.429712	0.0818264	0.334794	0.107775	0.367102	0.105668	0.468647	0.186296	0.542706	0.138676	0.645657	0.377808	0.296825	0.141967	0.559967	0.313538	0.362949	0.0554057	0.383141	0.0683652	0.537861	0.458026	0.364806	0.159481	0.389252	0.153601
575	ANGPTL3_Y417_Y417C	ANGPTL3	Y417	NLNGKCNKPRA	0	0.393299	0.069443	0.421822	0.132267	0.347001	0.0839068	0.388274	0.030961	0.434597	0.136737	0.596483	0.262086	0.640443	0.223158	0.558214	0.134698	0.389615	0.0767859	0.44601	0.113034	0.322231	0.0552745	0.409568	0.101882	0.440111	0.11831
576	ANGPTL7_Y145	ANGPTL7	Y145	RISGVYKLPPD	1	0.82744	0.0840303	1.00007	0.336134	0.571597	0.100542	0.838056	0.397622	0.784873	0.267757	0.899787	0.227429	0.499933	0.113299	0.852363	0.146851	0.623476	0.229207	0.800668	0.374959	0.510816	0.299024	0.585677	0.422623	0.71902	0.244609
577	ANGPTL7_Y145_R140H	ANGPTL7	Y145	HISGVYKLPPD	1	2.29978	0.255036	3.26279	1.17372	0.718386	0.231022	0.697016	0.363913	1.00083	0.194349	1.78766	2.13951	0.618227	0.292194	1.33047	0.659369	0.585217	0.397419	0.669689	0.27124	0.555951	0.14013	0.599615	0.226357	0.725055	0.312283
578	ANK1_Y1073	ANK1	Y1073	RLCQDYDTIGP	1	0.970854	0.222606	0.838376	0.553879	1.61406	1.09211	0.964137	0.472725	0.778493	0.255234	1.8754	0.819134	1.05333	0.571785	1.43692	0.244496	0.541325	0.18438	0.97557	0.269579	2.96474	1.03198	3.94185	0.498624	0.601899	0.102614
579	ANK1_Y1073_T1075I	ANK1	Y1073	RLCQDYDIIGP	1	1.46752	0.282725	1.60394	1.29026	2.45531	1.94728	0.662538	0.156391	1.16649	0.348551	2.56202	1.34237	1.80631	0.78628	1.26454	0.486134	2.35458	1.69353	1.83656	0.694661	10.0344	4.26941	12.7328	3.74712	1.26431	0.406907
580	ANK1_Y624	ANK1	Y624	RSLLQYGGSAN	1	0.458792	0.260894	0.537194	0.193322	0.813141	0.445109	1.00842	0.423553	0.626281	0.228118	0.963614	0.480967	0.800281	0.585741	0.85742	0.152806	0.574395	0.519312	0.772415	0.398488	0.708645	0.475498	0.717271	0.485817	0.438977	0.154767
581	ANK1_Y624_R619H	ANK1	Y624	HSLLQYGGSAN	1	0.357157	0.0740947	0.427153	0.12753	0.504701	0.256638	0.47172	0.202963	0.393722	0.132092	0.579299	0.167803	0.446845	0.232812	0.480857	0.200862	0.316179	0.189119	0.530737	0.311715	0.420698	0.173525	0.582983	0.225783	0.386437	0.0458824
582	ANK1_Y735	ANK1	Y735	KTKLGYSPLHQ	1	0.368548	0.131339	0.372814	0.0876769	0.322145	0.056896	0.690576	0.399948	0.397088	0.0618983	0.453957	0.0647544	0.354495	0.0740186	0.480011	0.0895416	0.310446	0.0755229	0.384718	0.109881	0.295764	0.110206	0.326344	0.0833709	0.399439	0.0948183
583	ANK1_Y735_L733I	ANK1	Y735	KTKIGYSPLHQ	1	0.424791	0.0691457	0.407713	0.0861921	0.435046	0.0487809	0.455774	0.0729159	0.489717	0.0752588	0.489141	0.113113	0.434286	0.0858962	0.511792	0.0552479	0.422137	0.103325	0.383895	0.0733274	0.326096	0.0379241	0.448594	0.0775356	0.46573	0.0694586
584	ANK2_Y1455	ANK2	Y1455	ITLPIYTKESE	1	0.974469	0.249181	0.880311	0.295101	0.9075	0.330648	0.847771	0.103771	1.10632	0.113664	0.960681	0.177446	0.484963	0.122614	1.1877	0.136276	0.721521	0.275357	0.760003	0.273054	0.640945	0.119879	0.498762	0.058945	1.75253	2.40448
585	ANK2_Y1455_E1458G	ANK2	Y1455	ITLPIYTKGSE	1	0.529316	0.0452544	0.580807	0.23301	0.64456	0.272669	0.445545	0.0569754	0.571242	0.194817	0.629795	0.0653132	0.451338	0.114437	0.758859	0.237288	0.391991	0.114597	0.502342	0.0605298	0.598756	0.426389	0.478494	0.160374	0.48071	0.0275029
586	ANK2_Y3907	ANK2	Y3907	KIIRRYVSSEG	1	0.457554	0.162592	0.409941	0.110125	0.37139	0.0999574	0.416371	0.0906786	0.530939	0.107741	0.509084	0.260731	0.365266	0.112655	0.478866	0.113981	0.383616	0.066046	0.339749	0.0550434	0.32096	0.0798635	0.357884	0.0414435	0.351341	0.0818712
587	ANK2_Y3907_R3906W	ANK2	Y3907	KIIRWYVSSEG	1	0.455004	0.162318	0.510088	0.162918	0.497801	0.203026	0.746631	0.047896	1.19818	0.0512093	1.30721	0.0738691	0.543137	0.0994933	1.33922	0.191132	0.550416	0.160724	0.783888	0.253152	0.689602	0.11612	0.678718	0.235383	0.414606	0.0901894
588	ANKZF1_Y572	ANKZF1	Y572	RARPPYTVAAD	1	0.349068	0.0323748	0.349786	0.0617952	0.449895	0.197401	0.465581	0.134813	0.580384	0.130234	0.551462	0.149437	0.442654	0.0899563	0.591408	0.190195	0.389619	0.064327	0.457979	0.128714	0.40047	0.0823332	0.378008	0.136795	0.418472	0.130869
589	ANKZF1_Y572_R569W	ANKZF1	Y572	RAWPPYTVAAD	1	0.617613	0.10614	0.570842	0.24885	0.596856	0.161234	0.736513	0.13302	0.683365	0.104902	0.883911	0.225733	0.631396	0.364086	1.10796	0.371746	0.572695	0.28232	0.589143	0.11206	0.677745	0.16947	0.516806	0.108144	0.474565	0.123013
590	ANO1_Y981	ANO1	Y981	APSHAYHGGVL	1	0.474573	0.170908	0.381723	0.105036	0.50025	0.268928	0.505344	0.141907	0.495661	0.0751729	0.520409	0.108604	0.501712	0.245564	0.494223	0.140117	0.625724	0.357642	0.426949	0.0733449	0.371132	0.0493042	0.335682	0.0715746	0.380953	0.0535503
591	ANO1_Y981_G983R	ANO1	Y981	APSHAYHRGVL	1	0.425847	0.0637327	0.423576	0.108142	0.385303	0.0642898	0.50982	0.0947122	0.534381	0.128472	0.506638	0.0843844	0.41064	0.0757935	0.582528	0.103411	0.395001	0.073543	0.472364	0.0602822	0.363481	0.0900386	0.35451	0.0607945	0.380324	0.0161735
592	ANOS1_Y217	ANOS1	Y217	IEPVIYVVQRR	1	0.356437	0.01216	0.303533	0.096161	0.314743	0.137677	0.579608	0.333591	1.0972	0.607025	1.36595	0.940731	0.271289	0.06378	1.22488	0.755191	0.367883	0.11106	0.475001	0.0507241	0.209192	0.057125	0.486329	0.233212	0.530652	0.214966
593	ANOS1_Y217_Y217D	ANOS1	Y217	IEPVIDVVQRR	0	0.25809	0.0357429	0.389777	0.183877	0.459312	0.218486	0.623935	0.225104	0.638438	0.162025	1.0192	0.170983	0.353688	0.105194	0.980144	0.276797	0.392552	0.126002	0.592352	0.204519	0.378991	0.156648	0.56634	0.458769	0.35969	0.195585
594	ANOS1_Y259	ANOS1	Y259	RPSRWYQFRVA	1	0.755671	0.159843	1.00906	0.286517	0.64204	0.359065	0.955083	0.241362	0.893777	0.335878	1.22381	0.654876	1.02767	0.560382	1.54863	1.24114	0.74808	0.269594	0.887266	0.190068	0.834303	0.658656	0.716672	0.28015	0.699205	0.167844
595	ANOS1_Y259_R262P	ANOS1	Y259	RPSRWYQFPVA	1	0.64846	0.130026	0.496094	0.217109	0.499609	0.322087	0.657213	0.265146	0.913501	0.467249	2.94949	3.45588	0.69244	0.236509	0.888775	0.365689	2.41112	1.05295	1.37712	0.894828	0.403287	0.0892558	0.432922	0.216229	7.23127	1.45578
596	ANPEP_Y600	ANPEP	Y600	RQQQDYWLIDV	1	1.47128	0.285849	0.846795	0.25933	0.625161	0.317033	1.31998	0.763839	2.43086	0.118664	3.3009	0.972131	3.21115	0.660124	1.59738	0.666016	20.6195	10.1061	17.405	8.37043	8.95201	2.46305	4.63881	1.25922	4.02196	0.727129
597	ANPEP_Y600_I603K	ANPEP	Y600	RQQQDYWLKDV	1	0.564285	0.19312	0.305134	0.12641	0.322466	0.146817	0.661559	0.119546	1.25155	0.467994	1.07418	0.452696	0.495499	0.228615	0.910957	0.274566	0.710249	0.286583	0.740737	0.290151	0.483925	0.164853	0.555568	0.331429	0.519511	0.140163
598	ANPEP_Y600_I603M	ANPEP	Y600	RQQQDYWLMDV	1	0.508619	0.222445	0.53683	0.0725287	0.486849	0.266977	0.586814	0.212788	1.26277	0.171057	1.80428	0.485481	1.03192	0.264378	1.01356	0.172945	18.0434	3.7813	13.1366	2.21661	7.31809	2.24386	3.72182	0.67618	3.29415	1.09012
599	ANTXR2_Y380	ANTXR2	Y380	TVDASYYGGRG	2	0.641517	0.111323	0.729774	0.211895	1.13862	0.545276	0.575835	0.100944	0.609185	0.116075	0.511686	0.0826116	0.55935	0.241939	0.660023	0.153669	0.54605	0.141354	0.561192	0.131786	0.41117	0.102421	0.502926	0.193906	0.495169	0.123989
600	ANTXR2_Y380_Y381C	ANTXR2	Y380	TVDASYCGGRG	1	0.351001	0.0467822	0.383193	0.119378	0.435843	0.188191	0.464607	0.147961	0.557976	0.0135085	0.557506	0.161055	0.401977	0.0810328	0.695182	0.23855	0.495832	0.112545	0.43679	0.135922	0.392518	0.129654	0.516131	0.117801	0.452271	0.305422
601	ANTXR2_Y380_YF	ANTXR2	Y380	TVDASYFGGRG	1	0.413173	0.0461956	0.402913	0.0159648	0.425278	0.103436	0.519334	0.0736169	0.676802	0.2373	0.568695	0.0956114	0.31169	0.0109786	0.567137	0.112031	0.37156	0.148749	0.393952	0.120526	0.333344	0.0751526	0.336682	0.124034	0.437975	0.162295
602	ANTXR2_Y381	ANTXR2	Y381	VDASYYGGRGV	2	0.99915	0.144406	0.786315	0.389007	1.91714	0.677979	0.698157	0.517233	0.803572	0.15565	0.702261	0.145838	0.460234	0.102532	0.665205	0.143072	0.771947	0.132011	0.647069	0.171874	0.707778	0.668881	0.38589	0.0802752	0.77531	0.136865
603	ANTXR2_Y381_Y381C	ANTXR2	Y381	VDASYCGGRGV	1	0.475557	0.312971	0.675608	0.410466	0.342162	0.387584	0.518757	0.396363	0.57263	0.356066	0.7119	0.360756	0.479685	0.169848	0.629725	0.341099	0.404933	0.290659	0.462898	0.26512	0.372734	0.393899	0.280265	0.189384	0.558974	0.410563
604	ANTXR2_Y381_Y381C_YF	ANTXR2	Y381	VDASFCGGRGV	0	0.41344	0.13781	0.404642	0.12137	0.53879	0.0726362	0.743663	0.176577	0.894331	0.21563	0.817813	0.168173	0.490272	0.188187	1.11217	0.104298	0.53084	0.234257	0.628807	0.228299	0.514083	0.18303	0.495279	0.0939634	0.396227	0.0694957
605	ANTXR2_Y381_YF	ANTXR2	Y381	VDASFYGGRGV	1	0.391475	0.0546224	0.446658	0.151409	0.910294	0.587545	0.443089	0.0544104	0.573711	0.141091	0.560674	0.0888283	0.335985	0.0321791	0.632144	0.139371	0.319744	0.0407676	0.463377	0.0808876	0.396439	0.117434	0.33843	0.134518	0.37677	0.107534
606	ANXA1_Y335	ANXA1	Y335	ETKGDYEKILV	1	0.523219	0.132811	0.505751	0.0706538	0.650964	0.293692	0.819824	0.234767	1.01505	0.276507	1.16422	0.157634	1.03559	0.171235	1.16509	0.265888	0.54753	0.0758307	0.681977	0.158615	0.712566	0.214273	0.625068	0.188883	0.453875	0.0748405
607	ANXA1_Y335_G333E	ANXA1	Y335	ETKEDYEKILV	1	0.484019	0.0404843	0.500598	0.154776	0.572138	0.104831	0.779279	0.152722	1.01491	0.142216	1.09139	0.133716	0.598011	0.235637	1.23298	0.19718	0.509287	0.0769849	0.743445	0.298585	0.615788	0.0886601	0.598454	0.23336	0.530267	0.208985
608	ANXA13_Y90	ANXA13	Y90	DRPSEYAARQL	1	0.389188	0.0520393	0.453173	0.118882	0.428473	0.0653079	0.578727	0.122332	0.497937	0.0221215	0.597743	0.104178	0.340925	0.113733	0.655477	0.0657273	0.445105	0.0834751	0.481694	0.0725739	0.407508	0.04219	0.455901	0.166685	0.437231	0.0388029
609	ANXA13_Y90_R86H	ANXA13	Y90	DHPSEYAARQL	1	0.481833	0.039812	0.453885	0.0701081	0.524517	0.0908478	0.66013	0.162437	0.576177	0.0616288	0.657276	0.205243	0.364872	0.125365	0.633206	0.156603	0.495941	0.102142	0.444845	0.0669688	0.352429	0.0670528	0.494437	0.115924	0.453267	0.13446
610	ANXA3_Y15	ANXA3	Y15	GTVRDYPDFSP	1	0.372054	0.0499467	0.444456	0.109647	0.490471	0.17945	0.532174	0.0616314	0.701818	0.140322	0.759225	0.0807251	0.395204	0.0984242	0.789942	0.0787375	0.508387	0.0210411	0.586861	0.159928	0.440004	0.166533	0.559021	0.11758	0.363879	0.0861703
611	ANXA3_Y15_S19N	ANXA3	Y15	GTVRDYPDFNP	1	0.356867	0.040685	0.404055	0.19119	0.418433	0.0867328	0.663129	0.233059	0.899801	0.420662	0.784768	0.121273	0.407	0.0919738	0.795945	0.111655	0.402522	0.0600977	0.525754	0.0992568	0.519387	0.328626	0.43082	0.174005	0.304162	0.0382047
612	ANXA3_Y216	ANXA3	Y216	LTFDEYRNISQ	1	0.643196	0.213767	0.854239	0.465494	1.08231	0.493053	1.13118	0.293724	1.5853	0.632055	1.81879	0.386147	1.0821	0.777456	1.92607	0.82951	1.22608	0.696372	1.4923	0.491907	1.00931	0.699358	0.781659	0.455007	0.498264	0.10819
613	ANXA3_Y216_I219N	ANXA3	Y216	LTFDEYRNNSQ	1	0.75263	0.426718	0.674919	0.139982	0.442681	0.247829	1.12998	0.292036	1.37464	0.575139	0.762243	0.289149	0.553304	0.150169	1.24254	0.212941	0.572758	0.117402	0.632352	0.185615	0.430957	0.231593	0.681696	0.260618	0.399855	0.193622
614	ANXA3_Y295	ANXA3	Y295	EFKKHYGYSLY	3	0.59805	0.0870339	0.432721	0.0945553	0.726717	0.294033	0.540727	0.13017	0.554507	0.0282737	0.531196	0.0765646	0.353404	0.0329131	0.610753	0.0736375	0.471375	0.148794	0.380122	0.126557	0.367085	0.105653	0.389852	0.0932626	0.400909	0.0923744
615	ANXA3_Y295_F291S	ANXA3	Y295	ESKKHYGYSLY	3	0.540844	0.050749	0.453546	0.0629347	0.646421	0.147142	0.434738	0.051838	0.551384	0.0636113	0.594758	0.0868267	0.453051	0.092744	0.593399	0.133687	0.407945	0.0887168	0.473572	0.0692783	0.413168	0.0248621	0.455051	0.101654	0.485694	0.0685817
616	ANXA3_Y295_F291S_YF	ANXA3	Y295	ESKKHYGFSLF	1	0.452702	0.0501328	0.512662	0.181398	0.528273	0.109146	0.676362	0.152139	0.929619	0.0633827	1.01497	0.21056	0.526023	0.0829319	1.0285	0.153732	0.572434	0.126886	0.677561	0.128712	0.573931	0.0864011	0.54147	0.159688	0.526495	0.0415922
617	ANXA3_Y295_YF	ANXA3	Y295	EFKKHYGFSLF	1	0.459631	0.0451849	0.41308	0.168607	0.506505	0.144114	0.641808	0.0961892	0.751394	0.100086	0.948516	0.172506	0.560817	0.104493	1.00757	0.184893	0.460709	0.143807	0.721073	0.221195	0.574485	0.231014	0.508581	0.144082	0.415688	0.0589086
618	AP1S3_Y87	AP1S3	Y87	EIVHRYVELLD	1	0.498011	0.0619416	0.464052	0.191878	0.503953	0.156797	0.744099	0.151756	0.922296	0.101502	0.892124	0.16322	0.499064	0.0983559	1.06172	0.135915	0.410004	0.0684153	0.67302	0.168094	0.483331	0.184062	0.529722	0.146751	0.506089	0.0467978
619	AP1S3_Y87_I83T	AP1S3	Y87	ETVHRYVELLD	1	0.461208	0.0870757	0.477906	0.221113	0.519979	0.113493	0.613152	0.0809844	0.751983	0.0262754	0.905225	0.115754	0.43479	0.0581286	0.996745	0.155251	0.591459	0.1144	0.746288	0.382461	0.537979	0.202165	0.653958	0.403064	0.415009	0.0537374
620	APBA1_Y183	APBA1	Y183	GEDEPYSEPYA	2	0.550918	0.0644547	0.550094	0.0910243	0.47714	0.125529	0.845137	0.156867	1.15224	0.107785	1.35462	0.177072	0.618114	0.146916	1.19151	0.215198	0.515988	0.0869106	0.756442	0.167826	0.542356	0.0577463	0.673472	0.235637	0.530536	0.0748854
621	APBA1_Y183_S184A	APBA1	Y183	GEDEPYAEPYA	2	0.639229	0.106062	0.609102	0.100803	0.543557	0.235178	0.914999	0.0988767	1.33228	0.184885	1.59323	0.246406	0.525371	0.0990804	1.5345	0.207012	0.608033	0.127936	0.799312	0.135447	0.685335	0.0892568	0.693675	0.152525	0.635686	0.0334075
622	APBA1_Y183_S184A_YF	APBA1	Y183	GEDEPYAEPFA	1	0.648613	0.0574484	0.461618	0.0782205	0.592656	0.16133	0.814358	0.151706	1.47084	0.697461	1.42947	0.254064	0.5687	0.183961	1.21203	0.25235	0.607407	0.100663	0.87164	0.380017	0.584286	0.0871227	0.57084	0.155428	0.546695	0.0528006
623	APBA1_Y183_YF	APBA1	Y183	GEDEPYSEPFA	1	0.598486	0.0123111	0.587694	0.142035	0.599494	0.234495	0.597664	0.158067	1.01993	0.29347	1.34298	0.235235	0.512131	0.0407716	1.06026	0.155025	0.603402	0.0998564	0.680295	0.0961954	0.485288	0.107678	0.523065	0.232918	0.493368	0.089977
624	APBA1_Y187	APBA1	Y187	PYSEPYADYGG	3	4.43962	1.8586	1.8893	0.483092	1.40783	0.256255	1.03385	0.386355	1.55928	0.26825	2.10579	0.356789	1.34323	0.39731	1.71573	0.787128	3.21129	1.79286	2.22923	0.633215	1.04321	0.350849	1.17528	0.897704	0.911248	0.399374
625	APBA1_Y187_S184A	APBA1	Y187	PYAEPYADYGG	3	5.4684	1.36135	1.32693	0.396783	1.191	0.372562	1.82438	0.624716	2.47247	0.334322	2.86179	1.05485	0.860651	0.502281	3.066	3.00501	2.13186	1.17867	1.75945	0.974626	1.15632	0.50363	1.40064	0.318469	0.853205	0.156127
626	APBA1_Y187_S184A_YF	APBA1	Y187	PFAEPYADFGG	1	2.43252	0.435424	0.720439	0.250487	0.673335	0.254665	0.638266	0.528021	0.992607	0.482011	1.13272	0.562483	0.380461	0.180246	1.20348	0.373834	0.679602	0.249841	0.802383	0.206533	0.694736	0.199326	0.593151	0.335575	0.570522	0.240503
627	APBA1_Y187_YF	APBA1	Y187	PFSEPYADFGG	1	3.38727	1.01799	1.14719	0.411598	0.785671	0.275124	1.3844	0.584707	0.991224	0.338002	1.00137	0.233504	0.718623	0.239557	1.28997	0.42995	1.00422	0.352974	0.956976	0.212051	0.543196	0.185335	0.487698	0.0843802	0.760053	0.3329
628	APBB1IP_Y331	APBB1IP	Y331	SWKRRYFLLRA	1	0.713273	0.106807	0.564061	0.232623	0.942784	0.948507	0.637463	0.124383	0.609004	0.125864	0.72683	0.432394	0.565113	0.206558	0.630548	0.208344	0.613533	0.204545	0.654536	0.15753	0.59452	0.273138	0.579568	0.145712	0.75935	0.186139
629	APBB1IP_Y331_R335W	APBB1IP	Y331	SWKRRYFLLWA	1	0.660516	0.134774	0.575586	0.218757	0.497412	0.186024	0.478458	0.0951391	0.570932	0.127984	0.686113	0.182238	0.433413	0.0874748	0.590746	0.142433	0.478832	0.134864	0.544682	0.103305	0.442977	0.149757	0.499726	0.15805	0.590256	0.0988114
630	APBB1IP_Y340	APBB1IP	Y340	RASGIYYVPKG	2	8.23791	1.48009	15.0875	3.63696	15.0577	2.77588	43.8911	5.17217	4.09121	0.939697	1.38867	1.03081	1.8249	0.393235	1.24306	0.539847	5.74621	2.22351	5.79522	3.14013	16.6266	3.64885	9.83481	4.09878	19.8466	7.52716
631	APBB1IP_Y340_R335W	APBB1IP	Y340	WASGIYYVPKG	2	6.92425	0.756072	10.0124	3.00673	10.0687	3.69815	31.1363	0.398045	8.67431	1.90694	3.19993	1.74141	5.90798	1.61719	1.05444	0.239013	8.04796	0.856363	7.15103	1.97086	15.3375	3.42756	17.029	7.01505	11.4897	1.41923
632	APBB1IP_Y340_R335W_YF	APBB1IP	Y340	WASGIYFVPKG	1	5.31524	0.808762	7.44016	2.5914	7.16245	2.56563	28.6841	1.99394	7.68767	2.22043	2.81388	1.03516	2.87047	1.00373	0.992885	0.105859	4.76694	1.0255	4.2607	1.12397	10.0551	2.3289	10.0354	3.90842	8.99629	1.19176
633	APBB1IP_Y340_YF	APBB1IP	Y340	RASGIYFVPKG	1	4.7473	0.793983	6.15234	1.90381	8.09555	4.06147	34.291	6.87622	2.91233	0.78879	1.174	0.374361	0.730737	0.458835	1.20076	0.495383	1.71192	0.705667	1.71031	0.7467	5.09772	2.47233	2.36485	1.0018	13.8332	2.77051
634	APC_Y1183	APC	Y1183	DYSLKYATDIP	2	0.571137	0.11154	0.582442	0.246865	0.59974	0.195566	0.735957	0.265183	1.25315	0.055814	1.34961	0.150876	0.573357	0.0278655	1.29215	0.170981	0.60011	0.132882	0.913415	0.421927	0.780297	0.27285	0.565306	0.141809	0.500288	0.148167
635	APC_Y1183_A1184P	APC	Y1183	DYSLKYPTDIP	2	0.441578	0.0991047	0.53403	0.217157	0.503084	0.19113	0.519937	0.145151	0.851914	0.219369	0.866795	0.176859	0.476206	0.139372	0.844155	0.15506	0.691266	0.221794	0.866425	0.620357	0.61779	0.160008	0.477782	0.123671	0.548532	0.274021
636	APC_Y1183_A1184P_YF	APC	Y1183	DFSLKYPTDIP	1	0.533878	0.0798228	0.452014	0.208495	0.460348	0.19781	0.702233	0.247437	0.94255	0.168748	1.03259	0.306617	0.61578	0.0973039	1.18447	0.0598396	0.459207	0.12864	0.684542	0.13517	0.527948	0.16038	0.59875	0.160073	0.519963	0.106848
637	APC_Y1183_YF	APC	Y1183	DFSLKYATDIP	1	0.378362	0.060895	0.523931	0.215838	0.470075	0.1169	0.571839	0.129566	0.897312	0.107234	0.914232	0.11699	0.536403	0.201586	1.08237	0.276794	0.591826	0.10435	0.667708	0.223679	0.606278	0.189141	0.618702	0.279072	0.373826	0.122478
638	APC_Y2838	APC	Y2838	RHSGSYLVTSV	1	0.463009	0.154368	0.43142	0.0704776	0.615533	0.178284	0.610529	0.317991	0.963265	0.31818	0.759397	0.254103	0.510204	0.130428	0.862577	0.149364	0.438142	0.158386	0.450639	0.3138	0.505224	0.100123	0.558593	0.153844	0.681794	0.258886
639	APC_Y2838_L2839F	APC	Y2838	RHSGSYFVTSV	1	0.785256	0.500895	0.597932	0.250357	0.591037	0.0637501	0.740569	0.163546	0.889887	0.26127	0.894792	0.300895	0.44429	0.18604	0.845379	0.338205	0.57441	0.191722	0.565152	0.170233	0.51728	0.149187	0.654169	0.272972	0.675576	0.096125
640	APC_Y96	APC	Y96	MSLRSYGSREG	1	0.458364	0.170265	0.397603	0.07918	0.38683	0.088335	0.49074	0.0853363	0.451353	0.0759015	0.723366	0.402113	0.412846	0.0699633	0.585556	0.152287	0.372532	0.130844	0.414427	0.0947551	0.415657	0.0533219	0.419756	0.114728	0.417687	0.0536375
641	APC_Y96_R99W	APC	Y96	MSLRSYGSWEG	1	0.704741	0.483914	0.632789	0.691105	0.459069	0.918139	0.272827	0.222839	0.792679	0.518684	1.32537	1.23966	0	0	0.881118	0.498689	0.0336621	0.0752708	0.670865	0.578766	0.581339	0.541355	0.33819	0.555618	0.0469451	0.0938901
642	APCS_Y142	APCS	Y142	GLRQGYFVEAQ	1	0.327429	0.0450672	0.36552	0.144054	0.408417	0.190711	0.528529	0.0597929	0.806745	0.218613	0.945363	0.115718	0.419888	0.120348	1.07696	0.171734	0.559082	0.216088	0.637034	0.237829	0.526295	0.254144	0.505209	0.230738	0.360195	0.0823289
643	APCS_Y142_G141S	APCS	Y142	GLRQSYFVEAQ	1	0.453073	0.079008	0.456977	0.128091	0.504801	0.180146	0.479666	0.115007	0.596394	0.251598	0.717024	0.151213	0.37785	0.0887647	0.825118	0.190686	0.611816	0.0799267	0.697328	0.128362	0.532188	0.159804	0.491415	0.0344133	0.54255	0.0839801
644	API5_Y497	API5	Y497	LGNFNYEQRGA	1	0.430183	0.0912693	0.434565	0.0942714	0.485055	0.0856446	0.715323	0.210449	0.918829	0.155614	0.760641	0.228299	0.407798	0.177043	0.985745	0.127564	0.569258	0.172404	0.507309	0.0991754	0.473692	0.14314	0.456417	0.2119	0.392425	0.067452
645	API5_Y497_G493S	API5	Y497	LSNFNYEQRGA	1	1.14071	0.26564	1.13643	0.527719	0.508838	0.142158	1.115	0.626427	1.40925	0.600282	1.20598	0.468209	0.650935	0.408463	1.5092	0.595846	0.917775	0.311029	1.02129	0.405399	0.79553	0.166082	1.14849	1.04731	0.796494	0.0539274
646	APOA1_Y190	APOA1	Y190	THLAPYSDELR	1	0.434019	0.0919379	0.50969	0.11203	0.481087	0.139907	0.5215	0.117351	0.68778	0.217158	0.721882	0.211946	0.442203	0.133246	0.968122	0.1095	0.460306	0.0522774	0.594347	0.135417	0.51021	0.114758	0.581759	0.270666	0.467078	0.146905
647	APOA1_Y190_P189R	APOA1	Y190	THLARYSDELR	1	0.397395	0.0598937	0.539385	0.203982	0.400419	0.127708	0.405351	0.0578429	0.543149	0.139243	0.653212	0.285522	0.615822	0.147177	0.644814	0.291001	0.436511	0.0822374	0.449405	0.104657	0.320346	0.0764342	0.411815	0.155477	0.493537	0.245723
648	APOA1_Y53	APOA1	Y53	DSGRDYVSQFE	1	0.40253	0.0474327	0.489068	0.19427	0.529153	0.192803	0.600642	0.0934582	0.665103	0.148687	0.914054	0.110314	0.477623	0.115197	0.922474	0.103055	0.461511	0.0439624	0.673337	0.100167	0.685084	0.356954	0.492268	0.198497	0.409072	0.0783956
649	APOA1_Y53_G50R	APOA1	Y53	DSRRDYVSQFE	1	0.43005	0.0582804	0.409445	0.0765593	0.478176	0.0791375	0.566526	0.229431	0.645221	0.076874	0.761738	0.259767	0.387486	0.0919436	0.708625	0.0764379	0.541696	0.115224	0.503017	0.0475438	0.455895	0.115366	0.447487	0.100037	0.463889	0.0311024
650	APOA4_Y310	APOA4	Y310	RRVEPYGENFN	1	0.642901	0.223093	0.487024	0.240592	0.450103	0.242564	0.707259	0.302556	0.964636	0.0695788	1.2334	0.534268	0.541925	0.293616	1.20161	0.423359	0.421398	0.236528	0.655472	0.427428	0.521111	0.201639	0.384797	0.26836	0.560673	0.250763
651	APOA4_Y310_R305C	APOA4	Y310	CRVEPYGENFN	1	0.615732	0.141706	0.441424	0.161426	0.608399	0.246447	1.09991	0.447073	1.27941	0.051662	1.28143	0.0819551	0.649155	0.0743906	1.56604	0.323105	0.602732	0.169129	0.868681	0.291799	0.675487	0.0917068	0.651464	0.190132	0.583381	0.231288
652	APOA4_Y310_V307L	APOA4	Y310	RRLEPYGENFN	1	0.46255	0.0742662	0.281165	0.0882805	0.249648	0.0868204	0.370928	0.0626057	0.680846	0.0610151	1.04201	0.751191	0.315479	0.117065	0.731506	0.132901	0.265577	0.126215	0.493168	0.209886	0.397759	0.185867	0.317482	0.0981478	0.384579	0.128496
653	APOB_Y276	APOB	Y276	SYKNKYGMVAQ	2	0.569312	0.1791	0.367081	0.0821837	0.441616	0.040705	0.561708	0.110052	0.482603	0.133078	0.554661	0.173715	0.397649	0.134911	0.673865	0.205566	0.384572	0.18354	0.384765	0.158398	0.332585	0.139223	0.333412	0.164827	0.335012	0.0853209
654	APOB_Y276_K273N	APOB	Y276	SYNNKYGMVAQ	2	0.467371	0.069121	0.428081	0.036113	0.475625	0.124737	0.610385	0.236982	0.606974	0.0453852	0.623294	0.08725	0.411396	0.0599778	0.631827	0.0690184	0.410468	0.0809623	0.471108	0.120102	0.381233	0.0634503	0.474142	0.104591	0.378224	0.0491796
655	APOB_Y276_K273N_YF	APOB	Y276	SFNNKYGMVAQ	1	0.383714	0.0940544	0.394798	0.0748187	0.422413	0.0374559	0.461568	0.110905	0.509103	0.102079	0.542373	0.142663	0.399335	0.0666248	0.510241	0.138883	0.399891	0.0743055	0.469067	0.0705742	0.332368	0.0633944	0.503779	0.147795	0.430809	0.0520783
656	APOB_Y276_YF	APOB	Y276	SFKNKYGMVAQ	1	0.375145	0.0526987	0.352844	0.119482	0.354478	0.114041	0.465256	0.0570891	0.430114	0.0571567	0.419946	0.0444536	0.334975	0.0554087	0.573531	0.152628	0.334831	0.0367373	0.389998	0.0190235	0.302122	0.0505524	0.354365	0.0553862	0.340664	0.0543342
657	APOB_Y740	APOB	Y740	VDHFGYTKDDK	1	0.392741	0.0299755	0.369403	0.0731714	0.462939	0.122846	0.669742	0.243576	0.761901	0.21841	0.708897	0.0832814	0.408444	0.0914477	0.763594	0.113136	0.49699	0.114616	0.498215	0.123415	0.387533	0.0463544	0.327047	0.124384	0.395397	0.0378924
658	APOB_Y740_T741N	APOB	Y740	VDHFGYNKDDK	1	0.484705	0.0901677	0.484999	0.2083	0.435927	0.0794639	0.974386	0.817957	1.09969	0.493246	1.01986	0.536091	0.397707	0.101514	0.874429	0.103285	0.465322	0.0788751	0.493436	0.18887	0.426523	0.0361416	0.528121	0.0925004	0.434258	0.0276788
659	APOC2_Y47	APOC2	Y47	ESLSSYWESAK	1	0.392135	0.0977017	0.414314	0.135957	0.4643	0.269311	0.58412	0.060248	0.887865	0.244733	0.83962	0.131519	0.354467	0.095178	1.00824	0.227721	0.630029	0.144936	0.692099	0.170405	0.527197	0.137173	0.576489	0.343729	0.380847	0.111295
660	APOC2_Y47_W48R	APOC2	Y47	ESLSSYRESAK	1	0.303129	0.0136538	0.341928	0.042688	0.304578	0.0531083	0.49535	0.113672	0.486908	0.0352568	0.6302	0.159434	0.313536	0.124034	0.528518	0.144105	0.382088	0.0754646	0.456329	0.118093	0.251749	0.0992984	0.316693	0.0408135	0.390999	0.193167
661	APOE_Y180	APOE	Y180	KRLAVYQAGAR	1	0.378424	0.0557664	0.405115	0.0643736	0.335224	0.0606278	0.398398	0.0338306	0.464444	0.111074	0.49536	0.11124	0.333114	0.0804384	0.504216	0.053541	0.403478	0.105074	0.364895	0.0632912	0.316233	0.0705747	0.399427	0.0813632	0.345855	0.0224979
662	APOE_Y180_R176C	APOE	Y180	KCLAVYQAGAR	1	2.44942	0.725907	0.646322	0.062872	0.811572	0.180381	0.734461	0.166555	0.744085	0.160298	0.737465	0.208778	0.486555	0.109038	0.741642	0.182715	0.469836	0.0597997	0.557111	0.081288	0.597113	0.241292	0.645659	0.0868468	0.477957	0.0538385
663	APP_Y728	APP	Y728	LKKKQYTSIHH	1	1.03205	0.0934822	0.920379	0.375824	0.869469	0.393777	1.38475	0.554065	0.948805	0.233403	0.630999	0.33893	0.687647	0.387141	0.786732	0.282431	0.630841	0.283464	0.902675	0.749089	0.739221	0.395173	0.605166	0.299717	0.507764	0.281402
664	APP_Y728_L723P	APP	Y728	PKKKQYTSIHH	1	0.456861	0.100208	0.756613	0.195185	0.755036	0.482349	0.616769	0.296085	0.849556	0.294893	0.64606	0.269857	0.594702	0.141022	0.849291	0.299785	0.710198	0.102696	0.92809	0.271628	0.441419	0.213644	0.645592	0.310801	0.655876	0.221222
665	APRT_Y60	APRT	Y60	GGRIDYIAGLD	1	0.422097	0.0832888	0.40889	0.0683619	0.5202	0.0751419	0.581788	0.14249	0.708283	0.0416972	0.897973	0.19087	0.520612	0.209951	0.829398	0.0541491	0.446771	0.0848507	0.544738	0.070535	0.850388	0.582485	0.416653	0.0647964	0.460267	0.103413
666	APRT_Y60_D65V	APRT	Y60	GGRIDYIAGLV	1	0.423405	0.0862671	0.418455	0.201877	0.567727	0.174651	0.57252	0.176549	0.87064	0.0454387	1.19299	0.413726	0.715288	0.347475	1.11275	0.278192	0.495577	0.125822	0.717066	0.179706	0.562268	0.234462	0.604378	0.201856	0.389408	0.0761571
667	APTX_Y209	APTX	Y209	VIKDKYPKARY	2	0.454479	0.0960803	0.256439	0.0435903	0.372981	0.171671	0.691904	0.247416	0.830337	0.45706	0.727937	0.696968	0.426357	0.228104	0.699088	0.301682	0.440164	0.271728	0.550968	0.299815	0.375788	0.230404	0.416931	0.204747	0.379851	0.0653799
668	APTX_Y209_A212V	APTX	Y209	VIKDKYPKVRY	2	0.487256	0.152639	0.365364	0.0554615	0.465793	0.109729	0.576986	0.226649	0.692712	0.393387	0.448478	0.0931114	0.40238	0.0482664	0.667102	0.217268	0.44118	0.1002	0.448779	0.110061	0.414314	0.116297	0.436752	0.0714025	0.349565	0.0364429
669	APTX_Y209_A212V_YF	APTX	Y209	VIKDKYPKVRF	1	0.451957	0.0172098	0.278072	0.135642	0.442843	0.175507	0.560463	0.196998	0.734262	0.291232	0.493155	0.125859	0.44792	0.15319	0.590982	0.219765	0.444063	0.117965	0.598872	0.187938	0.399778	0.0997549	0.373012	0.0973142	0.400499	0.116065
670	APTX_Y209_K211Q	APTX	Y209	VIKDKYPQARY	2	0.430031	0.0827844	0.363423	0.0922091	0.372503	0.0898961	0.523183	0.062064	0.554376	0.0590713	0.498268	0.0544034	0.419904	0.162212	0.569497	0.170517	0.3579	0.0901556	0.452889	0.103337	0.401103	0.100186	0.394362	0.0717675	0.376743	0.0315278
671	APTX_Y209_K211Q_YF	APTX	Y209	VIKDKYPQARF	1	0.440376	0.121689	0.349551	0.0568397	0.308266	0.0730692	0.469733	0.0822039	0.553422	0.206741	0.452522	0.148616	0.327522	0.112618	0.579301	0.179871	0.367109	0.0972414	0.469193	0.138677	0.436185	0.0570402	0.325875	0.11645	0.4057	0.0838695
672	APTX_Y209_R213H	APTX	Y209	VIKDKYPKAHY	2	0.377131	0.0324707	0.278463	0.049581	0.272709	0.0913275	0.560825	0.160346	0.579265	0.0873281	0.44937	0.205526	0.358055	0.0739527	0.598597	0.122263	0.339954	0.135911	0.504746	0.340183	0.267985	0.0631906	0.358675	0.0403152	0.284973	0.0366065
673	APTX_Y209_R213H_YF	APTX	Y209	VIKDKYPKAHF	1	0.368709	0.117683	0.389491	0.061569	0.284445	0.108691	0.514278	0.0811461	0.534172	0.259586	0.523324	0.147582	0.355441	0.0602751	0.492951	0.0731759	0.37971	0.100061	0.387392	0.057601	0.284975	0.0814383	0.300429	0.051175	0.355674	0.0632033
674	APTX_Y209_YF	APTX	Y209	VIKDKYPKARF	1	0.408466	0.0257372	0.294362	0.037166	0.331716	0.158843	0.646401	0.0779371	0.772338	0.404344	0.454939	0.201939	0.288434	0.12596	0.671801	0.230424	0.424594	0.0735297	0.504056	0.172159	0.339124	0.135273	0.296651	0.138352	0.373853	0.0672422
675	APTX_Y214	APTX	Y214	YPKARYHWLVL	2	0.383209	0.0753	0.429393	0.158577	0.493192	0.106468	0.706624	0.137289	0.940881	0.0746012	0.950348	0.205957	0.538694	0.0923166	1.08076	0.253226	0.581882	0.0343627	0.670262	0.134788	0.507494	0.161087	0.551875	0.0948384	0.481741	0.0660077
676	APTX_Y214_A212V	APTX	Y214	YPKVRYHWLVL	2	0.474181	0.0859922	0.531319	0.0997413	0.546863	0.234066	1.14745	0.39336	1.06196	0.029007	0.999702	0.170126	0.505698	0.0612004	1.3488	0.253285	0.680857	0.164089	1.02656	0.368939	0.652023	0.231485	0.75751	0.322241	0.448106	0.092463
677	APTX_Y214_A212V_YF	APTX	Y214	FPKVRYHWLVL	1	0.513411	0.0769583	0.420257	0.17616	0.424518	0.150154	0.978252	0.347569	1.18422	0.352898	0.993604	0.356678	0.528774	0.205669	1.20718	0.346487	0.428225	0.0773863	0.631336	0.150852	0.809987	0.390349	0.67168	0.193285	0.461406	0.0383839
678	APTX_Y214_H215R	APTX	Y214	YPKARYRWLVL	2	0.398697	0.0519567	0.463633	0.0899653	0.422171	0.184797	0.499054	0.111748	0.60005	0.1715	0.786493	0.0492461	0.455742	0.0411452	0.786531	0.147924	0.610939	0.281808	0.49155	0.149132	0.433709	0.0576976	0.553409	0.165988	0.4781	0.147161
679	APTX_Y214_H215R_YF	APTX	Y214	FPKARYRWLVL	1	0.436111	0.0415953	0.386023	0.0702424	0.406889	0.109388	0.53358	0.121724	0.717066	0.190006	0.71489	0.107568	0.352471	0.115098	0.719699	0.0772257	0.533321	0.123323	0.534234	0.0651396	0.447765	0.0607203	0.371123	0.0846725	0.494049	0.116479
680	APTX_Y214_K211Q	APTX	Y214	YPQARYHWLVL	2	0.410552	0.0972392	0.449389	0.211341	0.530525	0.180539	0.743946	0.173323	0.979776	0.131376	0.937189	0.163428	0.612383	0.0633298	1.1445	0.241435	1.95557	0.758297	1.48005	0.59129	0.720346	0.124985	0.585891	0.230282	1.05266	0.254459
681	APTX_Y214_K211Q_YF	APTX	Y214	FPQARYHWLVL	1	0.522255	0.0940392	0.45874	0.111537	0.542732	0.227852	0.858431	0.266175	1.2823	0.105516	0.913144	0.149026	0.539046	0.0306218	1.21484	0.290495	1.92	0.894092	1.48167	0.491784	0.568284	0.0735362	0.596711	0.250624	1.24228	0.0889954
682	APTX_Y214_R213H	APTX	Y214	YPKAHYHWLVL	2	0.486708	0.0907657	0.368	0.111096	0.501075	0.111411	0.845744	0.203171	1.15853	0.126958	0.823381	0.260631	0.571083	0.112556	1.15399	0.27088	2.5446	0.950142	1.93767	0.963347	0.504834	0.0889439	0.482417	0.182321	0.610115	0.0632591
683	APTX_Y214_R213H_YF	APTX	Y214	FPKAHYHWLVL	1	0.395904	0.0112398	0.447355	0.0779403	0.444258	0.158817	0.716118	0.128424	0.863715	0.103862	0.818752	0.0625388	0.644671	0.10712	1.29026	0.352898	2.69064	1.31179	1.87389	1.25632	0.447598	0.143077	0.490896	0.187091	0.619075	0.11018
684	APTX_Y214_YF	APTX	Y214	FPKARYHWLVL	1	0.390013	0.073047	0.490683	0.317422	0.530257	0.24629	0.646532	0.187856	0.772332	0.140802	1.03036	0.231582	0.675181	0.250647	0.944714	0.180776	0.645196	0.109347	0.777476	0.0951	0.588402	0.136705	0.457392	0.211153	0.730771	0.524897
685	AQP6_Y231	AQP6	Y231	LASLIYNFVLF	1	7.22628	1.26387	7.61916	3.24658	5.88979	2.78707	4.09747	1.39683	1.5082	0.181026	1.73437	0.446959	14.5155	5.74439	2.19653	0.810976	3.53108	1.09863	3.34427	0.9715	1.93012	0.870845	4.51621	4.16634	7.84838	1.09314
686	AQP6_Y231_V234I	AQP6	Y231	LASLIYNFILF	1	12.6968	3.41252	13.2596	6.52601	11.4801	7.4361	5.48959	3.03928	2.98518	1.17102	2.66778	1.8708	18.9614	10.0616	3.72321	1.75421	4.44663	1.88923	4.489	1.4196	2.50898	1.06634	1.27962	0.648473	14.7279	4.8896
687	AR_Y269	AR	Y269	RGDCMYAPLLG	1	5.61289	0.482862	8.20117	2.39485	10.9145	2.86761	5.88707	3.08281	0.742798	0.094292	0.897835	0.19408	4.15585	0.931819	0.885359	0.268414	3.08207	1.39453	1.83191	1.06872	7.22747	1.67266	8.4037	2.56182	10.3951	1.84519
688	AR_Y269_M268T	AR	Y269	RGDCTYAPLLG	1	6.35292	0.369812	8.93514	1.7055	9.32689	2.76576	2.54885	1.07237	1.17832	0.189936	1.21152	0.153321	1.33535	0.308648	1.46062	0.331111	1.41685	0.585118	1.26488	0.476953	8.38359	0.828346	9.27589	3.35087	7.45337	0.784144
689	AR_Y269_P271S	AR	Y269	RGDCMYASLLG	1	6.00396	1.46863	6.63117	2.81799	7.26426	1.62574	1.42186	0.176001	1.02982	0.253766	1.25428	0.523442	1.09581	0.61453	1.39052	0.641477	1.45347	0.64276	1.51694	0.862836	2.42709	1.30529	1.48805	0.853279	4.86657	1.32911
690	AR_Y395	AR	Y395	ENPLDYGSAWA	1	0.476067	0.0752488	0.527351	0.107094	0.55929	0.145275	0.709159	0.177314	0.990582	0.135416	0.991709	0.102846	0.523627	0.124515	1.08389	0.0852817	0.491349	0.0893385	0.744293	0.219059	0.460189	0.153118	0.564955	0.196856	0.395395	0.0718744
691	AR_Y395_P392R	AR	Y395	ENRLDYGSAWA	1	0.434831	0.0903659	0.497987	0.120465	0.311106	0.0995484	0.501095	0.103438	0.823804	0.170844	0.77263	0.209925	0.351829	0.0844121	1.24767	0.579891	0.352944	0.0788079	0.503486	0.0741996	0.359261	0.114335	0.45308	0.0774919	0.363982	0.0689829
692	AR_Y395_P392S	AR	Y395	ENSLDYGSAWA	1	0.514385	0.0524746	0.555847	0.178771	0.566478	0.145332	0.638145	0.122805	0.864402	0.151693	1.04075	0.0964375	0.456661	0.104624	0.974868	0.187644	0.467366	0.0722598	0.590691	0.121592	0.485647	0.128346	0.67719	0.300954	0.462467	0.0728688
693	AR_Y552	AR	Y552	VLPIDYYFPPQ	2	1.27695	0.215053	0.68677	0.0706573	0.868984	0.195383	1.05823	0.224198	6.25774	1.06537	4.7542	2.19603	0.694039	0.303596	1.0789	0.301432	15.4341	4.74836	12.6217	3.67988	3.48012	1.71356	3.36429	1.47733	2.47009	0.706713
694	AR_Y552_L548F	AR	Y552	VFPIDYYFPPQ	2	1.33622	0.249086	0.815833	0.156693	0.85108	0.385271	0.92239	0.364836	6.12551	1.07935	5.63833	3.06584	0.535823	0.101554	0.913977	0.256178	13.816	1.80085	12.8762	1.17958	3.22371	0.628107	3.65447	1.08923	2.23838	0.30692
695	AR_Y552_L548F_YF	AR	Y552	VFPIDYFFPPQ	1	0.905922	0.162819	0.50771	0.180184	0.61814	0.0626567	1.0329	0.28629	2.76071	0.752099	4.04162	1.61243	0.643118	0.431476	1.04443	0.1725	12.586	2.06185	10.7202	3.74998	1.18546	0.198369	1.53145	0.150631	0.517572	0.0812491
696	AR_Y552_P549S	AR	Y552	VLSIDYYFPPQ	2	2.16642	0.0713991	1.02957	0.109163	0.880681	0.112567	1.24132	0.392778	6.81449	0.92995	6.3471	2.21509	0.605114	0.117989	1.08631	0.236508	13.2862	4.73733	10.7629	2.80384	3.13147	1.39815	3.20078	1.43536	3.49556	0.782602
697	AR_Y552_P549S_YF	AR	Y552	VLSIDYFFPPQ	1	0.827045	0.196832	0.496998	0.155788	0.571694	0.130662	0.784057	0.256648	1.58025	0.212222	5.83012	2.94646	0.51603	0.116764	1.11895	0.206329	12.742	1.91059	10.5385	1.26414	1.08293	0.179127	0.842854	0.178042	0.718585	0.147229
698	AR_Y552_YF	AR	Y552	VLPIDYFFPPQ	1	0.521652	0.101157	0.573833	0.188921	0.60351	0.211514	0.502	0.153179	0.968753	0.0904519	2.91241	1.3664	0.350049	0.086799	0.819725	0.222913	11.5267	1.32974	9.05687	2.59953	0.707842	0.0914301	0.914404	0.331942	0.459465	0.222341
699	AR_Y858	AR	Y858	CSRRFYQLTKL	1	0.527049	0.0770856	0.461644	0.0716861	0.506928	0.0727074	0.507984	0.167693	0.698172	0.204671	0.789948	0.136628	0.467612	0.0462967	0.717565	0.326806	0.454803	0.0523961	0.527557	0.0893831	0.407282	0.11459	0.548247	0.168116	0.447937	0.101239
700	AR_Y858_F857L	AR	Y858	CSRRLYQLTKL	1	0.657108	0.0841874	0.620905	0.198369	0.857856	0.543766	0.727781	0.175923	0.793786	0.374074	0.666406	0.246584	0.498916	0.0936571	0.768808	0.299006	0.516577	0.127247	0.456286	0.125744	0.451414	0.204615	0.590436	0.138908	0.557841	0.210498
701	AR_Y858_R855K	AR	Y858	CSKRFYQLTKL	1	0.449461	0.0540951	0.454493	0.087013	0.423807	0.123785	0.586574	0.0866221	0.705585	0.140017	0.750042	0.12427	0.492068	0.180814	0.88812	0.186228	0.40064	0.118585	0.556379	0.142143	0.545386	0.126764	0.439894	0.141252	0.469659	0.0964495
702	AR_Y858_R856C	AR	Y858	CSRCFYQLTKL	1	1.14078	0.148836	0.429249	0.107105	0.362369	0.153137	0.564122	0.185594	0.728343	0.147088	0.86424	0.0769979	1.8506	0.471324	0.903638	0.134081	0.600649	0.0670197	0.586557	0.0751069	0.450186	0.0898864	0.458786	0.258273	0.550221	0.150914
703	AR_Y858_R856H	AR	Y858	CSRHFYQLTKL	1	0.421716	0.0531011	0.444465	0.123497	0.463825	0.109682	0.763346	0.287798	0.969493	0.137634	1.06179	0.220276	0.615423	0.173498	1.16992	0.173184	0.705012	0.473006	0.662302	0.177276	0.501046	0.11015	0.576163	0.180426	0.43241	0.0257589
704	AR_Y916	AR	Y916	KVKPIYFHTQG	1	0.522414	0.185615	0.371464	0.0796522	0.384576	0.0608277	0.577748	0.148231	0.530352	0.170338	0.645453	0.222187	0.279732	0.0777234	0.708205	0.209949	0.468373	0.162394	0.507086	0.0808373	0.357771	0.0643383	0.421732	0.0789066	0.355679	0.042652
705	AR_Y916_F917L	AR	Y916	KVKPIYLHTQG	1	0.402048	0.0589742	0.405426	0.0883884	0.389626	0.0838924	0.73558	0.358712	0.61002	0.056772	0.687183	0.17215	0.437654	0.0793511	0.728433	0.14019	0.440502	0.0781552	0.611624	0.165585	0.496438	0.0973302	0.457222	0.0925112	0.539807	0.0920291
706	AR_Y916_H918R	AR	Y916	KVKPIYFRTQG	1	0.45383	0.0321832	0.404046	0.0965893	0.495255	0.0898569	0.626433	0.187637	0.490531	0.0360862	0.700637	0.131818	0.477457	0.0951668	0.644369	0.0721824	0.474866	0.109794	0.448277	0.07697	0.356134	0.0705088	0.39612	0.0756933	0.401108	0.0486769
707	AR_Y916_K911R	AR	Y916	RVKPIYFHTQG	1	0.952431	0.236527	0.641555	0.225179	0.621795	0.268782	1.03916	0.391991	1.5966	0.469405	1.16394	0.285906	0.763998	0.347062	1.68972	1.3907	0.705621	0.321798	0.764792	0.513538	0.643778	0.205103	0.804146	0.509476	0.762516	0.39008
708	AR_Y916_P914S	AR	Y916	KVKSIYFHTQG	1	0.436221	0.0256939	0.510126	0.108347	0.413641	0.130287	0.56283	0.246891	0.613814	0.102225	0.690191	0.16221	0.366885	0.0818926	0.718318	0.231808	0.414274	0.0561618	0.543827	0.105485	0.542235	0.0763742	0.448858	0.127926	0.378984	0.0490976
709	AR_Y916_Q920R	AR	Y916	KVKPIYFHTRG	1	0.477225	0.0586127	0.447803	0.190227	0.526847	0.0534061	0.633197	0.0920152	0.884763	0.123006	0.8531	0.14866	0.416058	0.0666285	0.892201	0.135776	0.597984	0.0768988	0.614424	0.105691	0.451937	0.0600202	0.498451	0.224111	0.456271	0.128669
710	AR_Y916_V912L	AR	Y916	KLKPIYFHTQG	1	0.523242	0.0592817	0.349376	0.051535	0.364078	0.0145293	0.568313	0.0360104	0.513097	0.0359511	0.601627	0.203359	0.311943	0.0679144	0.670554	0.128992	0.511216	0.189304	0.524966	0.0431464	0.393381	0.0937398	0.502572	0.0697762	0.400257	0.080674
711	ARAP1_Y359	ARAP1	Y359	TDHLRYFDSNK	1	0.410217	0.0679904	0.428239	0.098147	0.451091	0.15693	1.13897	1.17367	0.664863	0.0633889	1.04081	0.8157	0.455952	0.0765357	0.794108	0.116342	0.41422	0.0856498	0.573005	0.208426	0.611472	0.336023	0.442036	0.123064	0.466023	0.124349
712	ARAP1_Y359_R358Q	ARAP1	Y359	TDHLQYFDSNK	1	0.656255	0.0373956	0.789977	0.360773	0.697424	0.467182	0.695166	0.288791	0.913821	0.425087	0.809491	0.563685	0.653788	0.239865	1.31481	0.386211	0.927734	0.170366	0.84014	0.167561	0.721026	0.164064	0.651153	0.27911	0.607113	0.328327
713	ARAP2_Y380	ARAP2	Y380	IKSSIYDNRKE	1	0.580043	0.292864	0.366396	0.0477832	0.752634	0.353804	0.517904	0.157516	0.585617	0.147728	1.13099	0.894885	0.354691	0.0499785	0.725305	0.154629	0.537756	0.267771	0.50387	0.240602	0.307464	0.0835786	0.320929	0.0820085	0.415654	0.101775
714	ARAP2_Y380_K384N	ARAP2	Y380	IKSSIYDNRNE	1	0.399436	0.0360348	0.464392	0.0967388	0.696232	0.462424	0.397374	0.137426	0.465525	0.0908954	0.504654	0.127603	0.330341	0.0424887	0.583549	0.12116	0.442737	0.236757	0.38797	0.0863844	0.412834	0.0604726	0.502195	0.259879	0.405227	0.0848762
715	ARCN1_Y310	ARCN1	Y310	ISDDKYGRIRL	1	0.560392	0.155726	0.433925	0.0734155	0.453505	0.169479	0.433109	0.0937059	0.418802	0.133516	0.484493	0.110653	0.311941	0.061947	0.500679	0.0955013	0.406718	0.0781887	0.357202	0.0480522	0.356574	0.0445492	1.04475	1.41875	0.324515	0.0487714
716	ARCN1_Y310_K309N	ARCN1	Y310	ISDDNYGRIRL	1	0.884764	0.126953	0.703599	0.207124	1.82933	0.708846	0.401927	0.0590839	0.525452	0.09368	0.554267	0.114527	1.32026	0.195226	0.516476	0.196533	0.406517	0.105186	0.427635	0.0356788	0.521152	0.140384	1.20929	0.305737	0.343695	0.11117
717	ARF1_Y35	ARF1	Y35	KTTILYKLKLG	1	0.336275	0.115424	0.35776	0.16071	0.401255	0.135682	0.718945	0.231083	0.908931	0.131705	1.00704	0.304292	0.426179	0.0903491	1.00169	0.18657	0.40389	0.0729947	0.68755	0.163302	0.410197	0.106704	0.411131	0.167566	0.375555	0.0814981
718	ARF1_Y35_Y35H	ARF1	Y35	KTTILHKLKLG	0	0.325629	0.070409	0.333387	0.0871888	0.389957	0.0791635	0.590772	0.125192	0.547981	0.0675998	0.583849	0.066635	0.435409	0.0477784	0.739366	0.161333	0.438798	0.152589	0.518173	0.0803827	0.399721	0.0789623	0.509244	0.192364	0.349745	0.0768664
719	ARFGAP3_Y356	ARFGAP3	Y356	TSSSSYFDEPV	1	0.469761	0.090251	0.477907	0.204129	0.499865	0.183847	0.840669	0.252246	0.979738	0.119608	1.10247	0.215672	0.50601	0.135593	1.01437	0.142117	0.485699	0.125033	0.74855	0.219762	0.549021	0.223688	0.575646	0.173945	0.421278	0.0453717
720	ARFGAP3_Y356_S355R	ARFGAP3	Y356	TSSSRYFDEPV	1	0.399297	0.0666639	0.510735	0.230936	0.494796	0.187355	0.446949	0.0448445	0.609784	0.286584	0.791893	0.247635	0.417213	0.119307	0.838786	0.162019	0.596807	0.232808	0.687704	0.554062	0.507991	0.163803	0.39509	0.342987	0.390534	0.127064
721	ARFGAP3_Y473	ARFGAP3	Y473	QPAGNYSLSSV	1	0.798242	0.338476	0.423696	0.229808	0.714722	0.26234	0.996402	0.276587	0.873622	0.0530949	0.984882	0.632466	0.62333	0.0636077	0.945592	0.505088	0.413794	0.19583	0.750318	0.164191	0.865635	0.436244	0.637653	0.180887	0.929621	0.179774
722	ARFGAP3_Y473_Q468H	ARFGAP3	Y473	HPAGNYSLSSV	1	0.424877	0.216361	0.408722	0.146908	0.55343	0.140625	0.8674	0.354412	0.672396	0.0159052	0.49048	0.23151	0.619452	0.227453	0.666173	0.191617	0.561518	0.288747	0.457981	0.306814	0.705798	0.124761	0.579724	0.126078	0.625479	0.0860011
723	ARFGEF1_Y314	ARFGEF1	Y314	KNEVLYDGENH	1	0.417875	0.051833	0.421507	0.0718136	0.436279	0.0593654	0.667878	0.152397	0.762949	0.100437	0.942862	0.303611	0.401055	0.0710313	0.836086	0.175794	0.399218	0.12216	0.474669	0.0895097	0.403431	0.0224158	0.524641	0.18734	0.397833	0.048665
724	ARFGEF1_Y314_G316E	ARFGEF1	Y314	KNEVLYDEENH	1	0.581956	0.051642	0.537435	0.0841473	0.54735	0.20456	0.997386	0.219687	1.30091	0.259525	1.24985	0.258901	0.499915	0.0669151	1.39672	0.274098	0.591313	0.170499	0.670544	0.181875	0.568167	0.207205	0.618134	0.254191	0.401073	0.0569957
725	ARFGEF2_Y797	ARFGEF2	Y797	MTKEQYIKMNR	1	0.369319	0.0901518	0.396786	0.0577377	0.407375	0.133499	0.334716	0.209975	0.563257	0.455879	0.594719	0.322787	0.345837	0.173485	0.557783	0.104477	0.458198	0.193676	0.444647	0.120698	0.365018	0.12309	0.356946	0.0988351	0.347646	0.0140809
726	ARFGEF2_Y797_K794E	ARFGEF2	Y797	MTEEQYIKMNR	1	0.440996	0.0657369	0.451362	0.205969	0.492641	0.18744	0.611805	0.157746	1.01793	0.179654	0.941217	0.12374	0.523767	0.0397703	1.08731	0.154078	0.557738	0.304467	0.638271	0.193621	0.478451	0.143841	0.501918	0.150725	0.385539	0.0838208
727	ARFGEF2_Y797_R802Q	ARFGEF2	Y797	MTKEQYIKMNQ	1	0.340559	0.0494631	0.347201	0.12292	0.443111	0.11279	0.664853	0.0724191	0.705641	0.0616763	0.661805	0.287661	0.399181	0.145487	0.804684	0.191555	0.687053	0.631739	0.637493	0.265673	0.380369	0.0463627	0.574933	0.246568	0.381363	0.0423041
728	ARFGEF3_Y2029	ARFGEF3	Y2029	KLMTEYKKRKQ	1	0.441899	0.110521	0.418466	0.21868	0.4586	0.1835	0.62945	0.161614	0.653244	0.171128	0.477923	0.240778	0.410983	0.243602	0.68995	0.169827	0.330736	0.189547	0.54349	0.27792	0.335587	0.239618	0.340181	0.119769	0.519988	0.112644
729	ARFGEF3_Y2029_K2031R	ARFGEF3	Y2029	KLMTEYKRRKQ	1	0.526455	0.154537	0.543734	0.246715	0.521341	0.0780801	0.503138	0.192788	0.458224	0.134087	0.661248	0.189143	0.572737	0.0896422	0.571601	0.195842	0.677103	0.275346	0.646096	0.360579	0.476985	0.104625	0.495838	0.219781	0.536406	0.0443703
730	ARHGAP1_Y365	ARHGAP1	Y365	LPEENYQVLRF	1	1.3184	0.204608	0.76773	0.556626	2.81714	1.17878	1.17954	0.524143	1.44005	0.265547	1.42568	0.394252	2.12864	0.63901	1.3867	0.385631	2.81277	1.77967	2.16824	0.657234	4.1296	2.36297	1.4111	0.563735	0.801676	0.164299
731	ARHGAP1_Y365_R369C	ARHGAP1	Y365	LPEENYQVLCF	1	5.72781	1.17746	1.63878	0.988918	4.43386	2.19498	3.13709	1.72185	5.17474	0.739982	3.60668	2.33601	7.49649	3.8106	3.56314	1.91776	8.04126	2.17638	5.59016	2.81157	9.12637	2.49158	5.9598	3.34344	3.58049	1.36352
732	ARHGEF7_Y785	ARHGEF7	Y785	WTAHSYRMGST	1	0.373906	0.0515519	0.478923	0.101519	0.432148	0.0750441	0.437219	0.13872	0.432375	0.00449192	0.641858	0.129334	0.482163	0.171031	0.659498	0.21221	0.49562	0.0792155	0.470141	0.108928	0.460281	0.126279	0.406739	0.261895	0.369526	0.0538968
733	ARHGEF7_Y785_T790A	ARHGEF7	Y785	WTAHSYRMGSA	1	0.479567	0.15092	0.503081	0.1673	0.442816	0.0880605	0.494952	0.0789466	0.679177	0.060613	0.683379	0.19991	0.379829	0.102457	0.736018	0.202823	0.556046	0.152902	0.437797	0.113595	0.476561	0.0625933	0.45733	0.173445	0.377271	0.0614093
734	ARID1B_Y1091	ARID1B	Y1091	DLFRLYVCVKE	1	0.430535	0.0904597	0.396323	0.0899139	0.474798	0.232753	0.875313	0.225248	1.35507	0.0809637	1.17148	0.143943	0.548205	0.107044	1.51998	0.41771	0.388806	0.123808	0.880136	0.465534	0.697412	0.223062	0.670423	0.193392	0.364251	0.0649539
735	ARID1B_Y1091_V1092I	ARID1B	Y1091	DLFRLYICVKE	1	0.499477	0.113121	0.45617	0.118378	0.572148	0.280377	0.996517	0.100901	1.44664	0.0626565	1.18553	0.353489	0.591484	0.17218	1.61049	0.478031	0.470504	0.170521	1.00145	0.504318	0.740961	0.308002	0.715348	0.256316	0.391387	0.0526559
736	ARID1B_Y483	ARID1B	Y483	DMGAQYAAASP	1	0.504132	0.0704952	0.411277	0.029477	0.461599	0.14199	0.651945	0.10051	0.653143	0.0742368	0.646549	0.0684522	0.651613	0.206876	0.710321	0.15786	0.479526	0.211686	0.583909	0.15265	0.485961	0.162223	0.552135	0.159369	0.434146	0.0513818
737	ARID1B_Y483_P488R	ARID1B	Y483	DMGAQYAAASR	1	0.365449	0.101598	0.36953	0.17608	0.401611	0.217995	0.644255	0.284846	0.489555	0.0876758	0.574946	0.101426	0.393164	0.142072	0.539529	0.139712	0.357415	0.103077	0.395879	0.128618	0.370755	0.0799487	0.375076	0.103998	0.309545	0.0377573
738	ARMC9_Y107	ARMC9	Y107	IHFAIYLLKYS	2	0.44625	0.230628	0.515811	0.156521	0.46264	0.0789659	0.752502	0.355223	0.917311	0.26874	1.09269	0.401805	0.485986	0.13903	1.16129	0.194916	0.36831	0.138213	0.68577	0.241058	0.486384	0.201402	0.589661	0.314146	0.424502	0.128642
739	ARMC9_Y107_L108F	ARMC9	Y107	IHFAIYFLKYS	2	0.584511	0.0794503	0.723163	0.27761	0.786568	0.303229	1.09471	0.413666	1.72595	0.954777	1.20652	0.324612	0.586158	0.110057	1.41356	0.208984	0.666089	0.0518376	1.00884	0.622138	0.788956	0.336771	0.717988	0.228606	0.529341	0.203089
740	ARMC9_Y107_L108F_YF	ARMC9	Y107	IHFAIYFLKFS	1	0.434177	0.14092	0.447738	0.17917	0.5608	0.130686	0.63593	0.347415	0.636055	0.0874224	0.835443	0.251958	0.484517	0.146771	0.955813	0.130293	0.440934	0.136526	0.67417	0.210871	0.473392	0.287005	0.575579	0.194509	0.406494	0.0240652
741	ARMC9_Y107_YF	ARMC9	Y107	IHFAIYLLKFS	1	0.498953	0.107086	0.458244	0.186459	0.521481	0.193064	0.668037	0.163883	1.03093	0.241966	0.890975	0.176473	0.303076	0.0784417	1.05942	0.380535	0.36324	0.116603	0.683708	0.169365	0.561378	0.176286	0.456855	0.109059	0.413956	0.0939135
742	ARPC1B_Y35	ARPC1B	Y35	HEVHIYEKSGA	1	1.48371	0.328516	1.01141	0.427535	1.67998	0.988238	1.68586	0.843417	1.05739	0.855073	1.38357	0.247403	1.0267	0.270781	1.73725	0.795612	0.6728	0.182568	0.992706	0.4416	1.10328	0.486026	0.611475	0.593468	0.770263	0.385261
743	ARPC1B_Y35_K37N	ARPC1B	Y35	HEVHIYENSGA	1	0.865261	0.237942	1.04481	0.434186	1.62527	0.941096	1.32134	0.442366	1.30965	0.393784	1.44348	0.633937	1.26332	0.101091	2.27249	0.825638	0.703476	0.266663	0.892001	0.215823	1.38328	0.570516	1.28367	0.306008	0.825975	0.277405
744	ARSB_Y165	ARSB	Y165	RGFDTYFGYLL	2	6.45939	1.48139	8.57859	1.98613	7.08719	1.93568	1.55827	0.745312	5.8273	0.895133	2.15003	0.575874	3.58932	1.35325	1.62995	0.664769	3.58537	0.7984	3.3016	0.277246	5.13613	2.37883	8.25013	3.67655	4.01392	0.289879
745	ARSB_Y165_R160Q	ARSB	Y165	QGFDTYFGYLL	2	6.32016	1.29918	9.48177	2.27188	8.43802	1.17403	0.91951	0.308586	5.91609	1.29449	2.71914	0.771083	6.45277	1.18298	1.63482	0.531562	5.7777	1.81597	5.47665	2.66629	5.42415	1.66763	10.3458	2.47061	4.29679	2.25699
746	ARSB_Y165_R160Q_YF	ARSB	Y165	QGFDTYFGFLL	1	7.08857	0.811244	11.4261	1.53964	8.44834	0.938858	1.3257	0.347137	4.81089	1.14081	3.2856	1.94053	8.01661	2.52581	2.07629	0.514295	6.17744	2.35323	5.30619	2.50717	4.39381	0.644743	7.16841	1.43321	6.28741	2.12375
747	ARSB_Y165_YF	ARSB	Y165	RGFDTYFGFLL	1	6.92589	2.17395	8.77792	2.70139	6.5328	2.1734	1.14034	0.171775	4.63551	0.847895	1.67924	0.72937	4.06412	0.921683	1.53138	0.398542	3.39457	0.559996	3.25107	1.07575	4.24942	1.90358	4.30957	2.09394	5.2444	0.684396
748	ARVCF_Y901	ARVCF	Y901	LGPDGYSTVDR	1	0.395452	0.0690746	0.678933	0.291215	0.405009	0.242901	0.909088	0.6205	1.0114	0.202436	2.10894	2.39491	0.709311	0.1549	1.3146	0.594608	0.61706	0.191317	0.810125	0.398967	0.318452	0.281636	0.594119	0.152189	0.553062	0.176556
749	ARVCF_Y901_R906Q	ARVCF	Y901	LGPDGYSTVDQ	1	0.847655	0.350804	0.98176	0.428921	0.900272	0.564546	1.31226	0.34478	1.72296	0.165249	1.63282	0.443471	0.832968	0.396994	2.86635	2.60686	1.03877	0.62848	1.2059	0.244032	0.875893	0.297481	1.22026	0.884149	0.706673	0.235076
750	ASAH1_Y43	ASAH1	Y43	PSGPTYRGAVP	1	0.878368	0.585426	0.602349	0.0978012	0.582779	0.334369	0.489174	0.173681	0.61079	0.135306	0.771718	0.238235	0.41711	0.0434669	0.697843	0.173048	0.580005	0.330755	0.502664	0.183269	0.757368	0.394026	0.508527	0.365589	0.580419	0.197224
751	ASAH1_Y43_T42A	ASAH1	Y43	PSGPAYRGAVP	1	0.505955	0.16641	0.539475	0.098796	0.458882	0.201414	0.757798	0.159616	0.735607	0.102011	0.664356	0.323088	0.53345	0.232758	0.758525	0.190038	0.808663	0.298002	0.422619	0.094134	0.740451	0.342673	0.430758	0.252577	0.475963	0.199734
752	ASAH1_Y43_T42M	ASAH1	Y43	PSGPMYRGAVP	1	0.333591	0.0776751	0.466673	0.0908722	0.480025	0.206606	0.679999	0.272364	0.670415	0.0951183	0.617104	0.163612	0.346818	0.0469361	1.21361	1.17919	0.392058	0.192124	0.572952	0.201133	0.340206	0.149483	0.538954	0.338801	0.483095	0.217111
753	ASB10_Y457	ASB10	Y457	PRLLRYLQLDF	1	0.615571	0.383701	0.691539	0.286786	0.649841	0.199383	1.03828	0.263822	1.53025	0.247808	1.39385	0.392712	0.661933	0.231456	1.66555	0.215254	0.648093	0.180499	0.872996	0.334504	0.99549	0.19032	0.730027	0.285541	0.700879	0.164869
754	ASB10_Y457_R453C	ASB10	Y457	PCLLRYLQLDF	1	0.502417	0.167939	0.496796	0.288616	0.782881	0.291691	1.11851	0.592122	1.51027	0.674715	1.49499	0.266366	0.967994	0.486403	1.72432	0.189295	1.18001	0.753301	1.14218	0.318374	0.833287	0.256836	0.537898	0.176536	0.732653	0.483358
755	ASB2_Y162	ASB2	Y162	RETPLYKACER	1	0.568328	0.162675	0.457434	0.16797	0.576688	0.0951812	1.02508	0.503241	0.631849	0.248704	0.777309	0.294459	0.503881	0.195887	1.13185	0.60508	0.456583	0.124645	0.758887	0.156944	0.441037	0.303416	0.572688	0.26147	0.527249	0.127246
756	ASB2_Y162_P160S	ASB2	Y162	RETSLYKACER	1	0.938651	0.252927	0.480761	0.0985025	0.900013	0.623012	0.850418	0.276458	1.31271	0.340884	1.00121	0.328744	0.761895	0.270691	0.954128	0.347814	0.547865	0.313073	0.55773	0.264833	0.589876	0.244536	0.609415	0.338436	0.719346	0.446188
757	ASCC1_Y36	ASCC1	Y36	DEEDFYQGSME	1	0.603399	0.055417	0.598471	0.157704	0.654363	0.228608	0.88945	0.215691	1.54402	0.136953	1.46244	0.253835	0.797849	0.0465532	1.54334	0.279196	0.549441	0.136638	0.953007	0.430055	0.760818	0.154906	0.594666	0.0640367	0.523647	0.0960599
758	ASCC1_Y36_D34N	ASCC1	Y36	DEENFYQGSME	1	0.733461	0.311106	0.497584	0.149994	0.699632	0.153429	0.820701	0.211683	1.05539	0.210949	1.30136	0.338018	0.62381	0.156978	1.36545	0.21492	0.464897	0.040584	0.647079	0.130646	0.588292	0.189554	0.603597	0.209139	0.516568	0.0434633
759	ASIC2_Y357	ASIC2	Y357	EKDSNYCLCRT	1	0.505903	0.0694144	0.569054	0.125513	0.512863	0.0868987	0.573054	0.0258102	0.763269	0.218415	0.772068	0.0383874	0.442321	0.041161	0.883321	0.197622	0.555609	0.1084	0.604739	0.122604	0.55088	0.107709	0.633988	0.234867	0.60129	0.0621835
760	ASIC2_Y357_D354G	ASIC2	Y357	EKGSNYCLCRT	1	0.393104	0.0657501	0.503582	0.21838	0.348978	0.0546916	0.55976	0.0708472	0.571748	0.0592066	0.731987	0.160754	0.377664	0.122221	0.607071	0.228728	0.469403	0.139279	0.496846	0.116081	0.469773	0.0672874	0.450362	0.232549	0.458072	0.0738324
761	ASL_Y375	ASL	Y375	ATDLAYYLVRK	2	1.27265	0.2463	0.849779	0.151801	0.884826	0.170886	1.04024	0.338529	3.02563	0.536407	1.63037	0.47787	0.785924	0.124905	1.40775	0.213399	4.90456	1.28273	4.20541	1.83791	0.601818	0.223343	0.543472	0.141539	1.18516	0.289505
762	ASL_Y375_K380E	ASL	Y375	ATDLAYYLVRE	2	1.45498	0.0751622	0.929101	0.318056	1.01065	0.392066	0.5275	0.109624	2.38415	0.277634	1.20977	0.308766	0.429535	0.115584	0.908613	0.321281	8.48822	0.465796	6.9021	1.25831	0.675273	0.155294	0.475874	0.157229	1.22894	0.0874671
763	ASL_Y375_K380E_YF	ASL	Y375	ATDLAYFLVRE	1	0.782931	0.169328	0.80888	0.291398	0.782376	0.541529	0.938863	0.0736019	2.29489	0.53689	1.54205	0.158547	0.797361	0.194636	1.50913	0.259467	4.89632	1.14026	3.94891	1.87548	1.02255	0.605525	0.952837	0.772139	0.693978	0.051181
764	ASL_Y375_R379C	ASL	Y375	ATDLAYYLVCK	2	1.05661	0.184141	0.852408	0.369579	1.02208	0.348555	1.04028	0.31815	2.8212	0.648003	2.12982	0.16224	0.69625	0.0578563	1.76924	0.336507	3.43418	0.846057	3.06223	0.379659	1.08524	0.27056	0.884985	0.269816	0.883604	0.0921036
765	ASL_Y375_R379C_YF	ASL	Y375	ATDLAYFLVCK	1	0.655247	0.171493	0.56356	0.20936	0.674078	0.0827856	1.09862	0.273114	2.42172	0.739077	1.59609	0.505837	0.697837	0.0655436	1.61492	0.386177	1.16027	0.203135	1.26137	0.215643	0.789349	0.191406	0.616659	0.198303	0.517221	0.120098
766	ASL_Y375_YF	ASL	Y375	ATDLAYFLVRK	1	0.728396	0.0874113	0.725021	0.317147	0.68574	0.224304	1.20116	0.346412	2.71956	0.485168	1.72812	0.370412	0.509165	0.0318105	1.60191	0.435723	1.25934	0.356981	1.32521	0.0980165	0.72976	0.124938	0.872166	0.467318	0.642035	0.168782
767	ASL_Y376	ASL	Y376	TDLAYYLVRKG	2	0.782841	0.0672385	0.53856	0.173224	0.716139	0.148777	0.672191	0.0895255	2.04778	0.38206	0.962939	0.22445	0.479678	0.0951907	0.962191	0.229686	3.16888	0.679324	2.4198	1.07571	0.468209	0.116575	0.628655	0.191776	0.684025	0.170075
768	ASL_Y376_K380E	ASL	Y376	TDLAYYLVREG	2	1.67161	0.415883	0.734177	0.279073	0.954774	0.42977	0.579258	0.248114	3.03653	0.239575	1.54371	0.299908	0.466129	0.0599203	0.904957	0.417257	9.60998	1.00051	7.06446	1.50447	0.577964	0.170868	0.706443	0.658547	1.34359	0.136335
769	ASL_Y376_K380E_YF	ASL	Y376	TDLAFYLVREG	1	0.518771	0.0897592	0.43736	0.159856	0.546099	0.219216	0.850181	0.324047	1.24119	0.0139354	1.2768	0.215145	0.555245	0.183228	1.59409	0.220303	0.573916	0.143761	1.00825	0.418261	0.709112	0.303709	0.702671	0.191502	0.500845	0.17792
770	ASL_Y376_R379C	ASL	Y376	TDLAYYLVCKG	2	0.825177	0.189894	0.689215	0.173479	0.750153	0.323673	0.902551	0.361951	1.73526	0.407954	1.46226	0.437183	0.580792	0.172943	1.5685	0.340418	2.3922	0.76865	2.33309	0.513779	0.882796	0.192768	0.659787	0.328745	0.790179	0.218817
771	ASL_Y376_R379C_YF	ASL	Y376	TDLAFYLVCKG	1	0.47988	0.213196	0.411367	0.183712	0.546947	0.15831	1.13712	0.505821	1.56934	0.0583534	1.31101	0.249975	0.647479	0.136837	1.69972	0.457021	0.550818	0.219555	0.939624	0.375657	0.790296	0.152188	0.593487	0.131343	0.445758	0.0548764
772	ASL_Y376_YF	ASL	Y376	TDLAFYLVRKG	1	0.36112	0.0101945	0.545344	0.384606	0.669601	0.278897	0.610841	0.124444	0.945962	0.103325	1.39527	0.179895	0.540771	0.14427	1.27452	0.23194	0.496732	0.229451	0.988049	0.285255	0.649774	0.333669	0.724847	0.524625	0.505571	0.161325
773	ASNS_Y555	ASNS	Y555	RTLTHYKSAVK	1	0.58823	0.169061	0.349654	0.161595	0.500218	0.284492	0.563249	0.295297	0.800697	0.438015	0.532	0.203992	0.31238	0.131401	0.812795	0.221819	0.34979	0.163051	0.54508	0.244178	0.677954	0.54228	0.411478	0.169993	0.702001	0.31753
774	ASNS_Y555_R550C	ASNS	Y555	CTLTHYKSAVK	1	0.407956	0.0447759	0.387219	0.0663663	0.517764	0.0717433	0.529345	0.128607	0.688874	0.0980126	0.80717	0.146358	0.509905	0.0787035	0.749298	0.258839	0.513748	0.0472548	0.528527	0.195203	0.564238	0.14353	0.430981	0.107754	0.428279	0.120196
775	ASPA_Y64	ASPA	Y64	KKCTRYIDCDL	1	0.428538	0.0428976	0.388797	0.0984771	0.409614	0.0848187	0.757477	0.49563	0.781893	0.106433	0.79842	0.170741	0.422949	0.0829652	0.851604	0.107902	0.623256	0.285507	0.575214	0.185351	0.427968	0.180993	0.433709	0.0526408	0.421061	0.0814263
776	ASPA_Y64_D68A	ASPA	Y64	KKCTRYIDCAL	1	0.371386	0.0932759	0.335986	0.129791	0.3562	0.101049	0.550089	0.191841	0.594653	0.0523655	0.684112	0.0769398	0.418083	0.144255	0.754919	0.203577	0.39416	0.0649675	0.568039	0.189109	0.374407	0.0822109	0.394414	0.0410447	0.337592	0.041769
777	ASPA_Y64_L69R	ASPA	Y64	KKCTRYIDCDR	1	0.426933	0.14627	0.322518	0.139451	0.37011	0.12036	0.720394	0.278389	0.691262	0.0964065	0.832442	0.0839457	0.405832	0.118378	1.00539	0.352522	0.417113	0.0674227	0.542191	0.123827	0.402287	0.0349365	0.44538	0.12773	0.46103	0.0891642
778	ASPA_Y64_R63T	ASPA	Y64	KKCTTYIDCDL	1	0.414722	0.0901807	0.420288	0.158548	0.490976	0.171248	0.601073	0.232008	0.809597	0.11005	0.975207	0.171804	0.713444	0.445806	1.13828	0.279437	0.571121	0.183032	0.665193	0.244934	0.479933	0.18527	0.473828	0.195955	0.390696	0.0481408
779	ASS1_Y113	ASS1	Y113	REGAKYVSHGA	1	0.275482	0.0980162	0.377599	0.147826	0.39906	0.0659045	0.339493	0.0479832	0.469627	0.109889	0.499927	0.182986	0.566182	0.323504	0.627552	0.270986	0.384641	0.160221	0.501345	0.119689	0.552582	0.356871	0.399628	0.133437	0.403397	0.109845
780	ASS1_Y113_A111D	ASS1	Y113	REGDKYVSHGA	1	0.642538	0.160949	0.50465	0.180846	0.609727	0.215878	0.872823	0.579764	0.830207	0.093328	0.937613	0.342102	0.486103	0.0294511	1.033	0.272144	0.730867	0.208592	0.58025	0.188142	0.793693	0.0216952	0.621534	0.400308	0.744278	0.170689
781	ASS1_Y113_A118T	ASS1	Y113	REGAKYVSHGT	1	0.410762	0.0823126	0.362741	0.265725	0.369868	0.0781815	0.516708	0.174076	0.897951	0.29595	0.730473	0.196902	0.374605	0.112923	0.96888	0.417184	0.493486	0.339042	0.482467	0.312199	0.512853	0.180955	0.587111	0.125326	0.662575	0.287328
782	ASS1_Y113_G117C	ASS1	Y113	REGAKYVSHCA	1	0.516021	0.0327733	0.821883	0.540085	0.489159	0.251089	0.825053	0.135259	0.651765	0.128587	0.776279	0.348552	0.632871	0.372406	0.860094	0.403551	0.643383	0.306982	0.444981	0.281613	0.618097	0.191279	0.506448	0.150518	0.503589	0.207024
783	ASS1_Y113_G117D	ASS1	Y113	REGAKYVSHDA	1	0.564868	0.146581	0.655358	0.29113	0.552531	0.52507	0.750397	0.41492	0.886483	0.432573	1.39544	0.699889	0.766711	0.21444	0.98822	0.519492	0.647835	0.197966	0.738647	0.354861	0.50829	0.124816	0.423438	0.149216	0.833456	0.052007
784	ASS1_Y113_G117S	ASS1	Y113	REGAKYVSHSA	1	0.667156	0.334466	0.454272	0.171256	0.457487	0.0476139	0.818377	0.322095	0.690969	0.273581	0.76446	0.436401	0.50367	0.18514	0.78499	0.272708	0.472843	0.18601	0.854499	0.162767	0.41392	0.165027	0.468271	0.0776903	0.593459	0.077214
785	ASS1_Y113_R108L	ASS1	Y113	LEGAKYVSHGA	1	0.605112	0.129026	0.972662	0.510537	0.606077	0.260985	0.852244	0.104855	0.696166	0.31903	0.834783	0.29099	0.927891	0.452382	1.13894	0.292458	1.00172	0.252621	1.1647	0.815056	0.6818	0.301119	1.03537	0.571328	0.551114	0.297397
786	ASS1_Y163	ASS1	Y163	NDLMEYAKQHG	1	0.437485	0.0140811	0.457289	0.128707	0.5017	0.144703	0.750046	0.320786	0.856293	0.218231	0.852115	0.135729	0.540958	0.155883	0.895967	0.147585	0.487294	0.0847442	0.562523	0.13258	0.480131	0.142621	0.4711	0.120493	0.426028	0.0343634
787	ASS1_Y163_A164P	ASS1	Y163	NDLMEYPKQHG	1	0.44713	0.0689247	0.503087	0.0189704	0.501915	0.0763199	0.697328	0.0557434	0.765177	0.0634933	0.738455	0.0506754	0.376807	0.0755418	0.855465	0.0754817	0.505914	0.167453	0.479514	0.130269	0.459761	0.061235	0.480055	0.206839	0.450324	0.108283
788	ASS1_Y163_L160P	ASS1	Y163	NDPMEYAKQHG	1	0.396411	0.0446008	0.389094	0.101041	0.467413	0.0922142	0.718053	0.353968	0.859856	0.233539	0.769457	0.0824997	0.426402	0.0481533	0.876088	0.0850097	0.414559	0.0762071	0.527166	0.109456	0.41933	0.0677653	0.484687	0.186016	0.46517	0.0655331
789	ASS1_Y291	ASS1	Y291	AGTILYHAHLD	1	0.451455	0.082957	0.478556	0.223699	0.523444	0.232981	0.509188	0.0636569	0.495369	0.0732228	0.591404	0.163114	0.398091	0.0763719	0.702777	0.22768	0.534936	0.0372974	0.49678	0.0929379	0.526168	0.299045	0.779714	0.41771	0.56133	0.24639
790	ASS1_Y291_D296G	ASS1	Y291	AGTILYHAHLG	1	0.548891	0.113408	0.563847	0.10355	0.609641	0.181083	0.72712	0.11433	0.815981	0.0571557	0.819263	0.100351	0.495093	0.0421687	1.06999	0.216622	0.516699	0.0856799	0.625481	0.135011	0.534072	0.123952	0.633206	0.16714	0.863455	0.109982
791	ASS1_Y291_L290P	ASS1	Y291	AGTIPYHAHLD	1	0.377037	0.0158639	0.41485	0.114842	0.483842	0.171528	0.474346	0.14076	0.447294	0.0817506	0.506616	0.0482086	0.356525	0.108252	0.645232	0.254109	0.457788	0.129702	0.434711	0.115553	0.39459	0.133934	0.369285	0.11113	0.455732	0.250771
792	ASS1_Y291_Y291S	ASS1	Y291	AGTILSHAHLD	0	0.384112	0.120093	0.366933	0.0744563	0.411719	0.0591183	0.622127	0.149973	0.707245	0.0887668	0.749744	0.196666	0.373726	0.0374825	0.846975	0.125277	0.363744	0.0904142	0.545977	0.14289	0.788425	0.621933	0.45908	0.151102	0.28946	0.048763
793	ASS1_Y322	ASS1	Y322	FAELVYTGFWH	1	7.00862	1.36087	8.14473	4.12438	5.99939	2.17073	8.77724	4.63312	1.66893	0.306161	1.53686	0.314878	6.96868	1.33782	1.40921	0.421596	2.22177	0.327072	1.85099	0.352778	2.20736	0.653775	2.58961	0.868204	6.22697	1.59484
794	ASS1_Y322_G324S	ASS1	Y322	FAELVYTSFWH	1	6.81523	1.20286	8.65107	2.8306	7.37093	2.9996	14.0301	5.95745	2.10555	0.353944	2.3151	0.473421	8.85887	1.39043	1.88588	0.16474	5.30886	0.788584	4.28327	1.25967	2.99185	0.685873	3.44544	0.959225	7.38064	0.851634
795	ASS1_Y322_G324V	ASS1	Y322	FAELVYTVFWH	1	7.17517	1.42098	7.64268	4.04109	5.47366	2.42372	12.4679	5.52814	2.26996	0.375763	2.15538	0.406226	6.18933	2.97781	1.6265	0.37606	4.38854	1.8978	3.33555	1.30041	2.331	0.897975	2.93507	1.65927	8.05993	1.61763
796	ASS1_Y322_V321M	ASS1	Y322	FAELMYTGFWH	1	6.4288	1.47366	6.84892	2.48499	4.70331	1.42995	3.1612	1.6535	2.02197	0.360207	2.17503	0.36424	5.41869	1.81003	1.66545	0.249845	2.32375	0.680813	2.01997	0.573797	3.51531	1.47731	4.75632	1.89072	7.12043	1.13319
797	ASS1_Y359	ASS1	Y359	LKGQVYILGRE	1	0.437907	0.155396	0.679249	0.417766	0.368916	0.109463	1.46579	1.44966	1.16835	0.455275	1.09058	0.815889	0.756317	0.304268	1.2569	0.568818	0.405757	0.215057	1.06777	0.217104	0.52163	0.249843	0.949424	0.883107	0.559961	0.148663
798	ASS1_Y359_G356V	ASS1	Y359	LKVQVYILGRE	1	1.39063	0.736584	1.13434	0.81129	1.49191	0.606286	2.43827	1.34393	3.32742	0.763693	3.58006	1.36151	1.58848	0.744826	5.15272	2.32584	1.33857	0.813901	1.94959	0.5371	1.57812	0.706428	1.88077	0.366728	1.36108	0.409868
799	ASS1_Y359_G362V	ASS1	Y359	LKGQVYILVRE	1	0.333952	0.163798	0.343204	0.185654	0.454474	0.271157	0.921436	0.333144	1.14166	0.0607841	1.42622	0.213912	0.327855	0.254406	1.36165	0.380243	0.481006	0.125394	0.981891	0.550277	0.682189	0.189485	0.651828	0.720874	0.37452	0.0485199
800	ASS1_Y359_R363G	ASS1	Y359	LKGQVYILGGE	1	1.13418	0.405737	0.994937	0.393965	0.824416	0.235011	1.32096	0.3868	1.61682	0.197794	1.33294	0.489763	1.02041	0.473974	1.93253	0.0933921	1.061	0.422189	1.28209	0.696206	1.13231	0.417078	1.07071	0.789673	1.05107	0.346604
801	ASS1_Y359_R363L	ASS1	Y359	LKGQVYILGLE	1	0.632794	0.651154	0.490009	0.173604	0.985061	0.937778	0.759081	0.0313032	1.23046	0.119338	1.37074	0.431441	0.664193	0.440967	1.99272	0.289922	0.467325	0.118615	0.961445	0.219246	0.971395	0.394225	0.658112	0.306993	0.517896	0.214161
802	ASS1_Y359_R363Q	ASS1	Y359	LKGQVYILGQE	1	1.28287	0.352915	0.815924	0.306981	1.06764	0.374915	1.76738	0.974575	1.97762	0.703461	1.84176	1.25591	0.801892	0.370897	2.46735	1.44373	0.938903	0.80474	1.26456	0.898778	1.09221	0.535082	0.847729	0.59675	0.843494	0.37637
803	ASS1_Y359_R363W	ASS1	Y359	LKGQVYILGWE	1	0.5749	0.145254	0.574687	0.230387	0.507623	0.202473	0.804236	0.330075	1.14393	0.208027	1.13807	0.198949	0.641998	0.06572	1.40007	0.218608	0.544112	0.178409	0.810417	0.303242	0.655269	0.323568	0.570042	0.121212	0.427603	0.0943103
804	ASS1_Y359_Y359D	ASS1	Y359	LKGQVDILGRE	0	0.764008	0.293143	0.559223	0.216862	0.575296	0.135116	0.657778	0.0400087	1.25962	0.433462	0.803172	0.104907	0.597931	0.06944	1.06685	0.34472	0.578405	0.360786	0.638376	0.261644	0.539034	0.0775265	0.695521	0.167629	0.663271	0.370306
805	ASS1_Y83	ASS1	Y83	QSSALYEDRYL	2	1.20318	0.425066	0.996587	0.392519	4.43605	1.24884	0.609661	0.248338	1.00572	0.245906	1.1457	0.635066	7.79338	0.88902	1.12348	0.18871	0.559982	0.241026	0.739505	0.429542	3.125	0.76379	2.44889	0.502494	1.10117	0.503546
806	ASS1_Y83_R86C	ASS1	Y83	QSSALYEDCYL	2	3.60968	0.364567	3.00107	0.509897	1.8446	0.483374	1.35171	0.477532	1.50497	0.402247	1.82215	0.424646	16.9494	4.29512	2.94586	0.776369	0.787751	0.219238	1.02152	0.114186	12.372	1.12341	7.552	2.99933	3.43322	0.305095
807	ASS1_Y83_R86C_YF	ASS1	Y83	QSSALYEDCFL	1	4.68896	0.872852	3.02125	0.301801	2.28166	0.571487	1.14668	0.425091	1.95718	1.18149	1.91899	0.693461	16.4494	4.18419	2.83186	1.27969	0.851825	0.329498	0.784741	0.234841	10.4158	2.20871	7.24755	2.66316	4.12047	0.792065
808	ASS1_Y83_R86H	ASS1	Y83	QSSALYEDHYL	2	1.13574	0.42826	0.903682	0.0588035	1.57862	0.898078	0.733833	0.281736	1.18395	0.630176	1.23953	0.344819	18.5451	4.29067	1.1789	0.493271	0.476529	0.312712	0.702368	0.192552	5.41444	5.04735	2.07141	0.885026	1.32864	0.364261
809	ASS1_Y83_R86H_YF	ASS1	Y83	QSSALYEDHFL	1	2.1174	0.250559	1.35858	0.343459	1.57187	0.790928	1.03659	0.267474	0.897905	0.105111	1.07337	0.393424	17.9003	5.26595	1.46931	0.243156	0.653547	0.297188	0.459795	0.127876	5.91456	3.9329	4.1675	1.00164	2.5064	0.859693
810	ASS1_Y83_S79P	ASS1	Y83	QPSALYEDRYL	2	0.942206	0.268364	0.945722	0.291307	3.92237	0.43448	0.680613	0.188593	1.04449	0.293143	0.930353	0.358231	6.74251	1.38217	1.06244	0.349764	0.529089	0.172797	0.624626	0.376507	1.67104	0.23506	1.16003	0.262225	0.779584	0.190192
811	ASS1_Y83_S79P_YF	ASS1	Y83	QPSALYEDRFL	1	1.4121	0.290243	1.77401	1.20867	6.96921	1.28266	0.880854	0.389748	0.967577	0.0937622	1.40206	0.423462	10.6162	2.83912	1.40151	0.295835	0.816441	0.155145	1.11681	0.408045	3.03814	0.895502	2.01039	0.877321	1.11524	0.311572
812	ASS1_Y83_YF	ASS1	Y83	QSSALYEDRFL	1	2.01761	0.699964	1.48371	0.914355	6.4842	0.429647	1.08402	0.192133	1.23384	0.366887	1.19089	0.293491	10.1303	2.42205	1.5316	0.521697	0.781234	0.210225	1.0096	0.361266	4.13385	0.594589	1.85615	0.468531	1.2393	0.147089
813	ASS1_Y87	ASS1	Y87	LYEDRYLLGTS	2	0.83721	0.0573946	1.79345	1.4488	3.7324	1.95599	0.790354	0.362487	0.894309	0.207943	0.98221	0.354952	4.27124	2.58129	0.980672	0.188002	0.702136	0.133826	0.949902	0.639589	3.00941	2.17956	1.23285	0.854037	0.78591	0.19793
814	ASS1_Y87_R86C	ASS1	Y87	LYEDCYLLGTS	2	4.68398	0.56219	4.11793	0.534953	1.89608	0.845102	1.07926	0.412951	1.77992	0.298739	2.2915	0.396955	13.4394	3.88456	2.12267	0.548192	1.26098	0.538051	1.28049	0.302549	7.04016	1.22913	3.4189	0.56501	3.13358	1.04211
815	ASS1_Y87_R86C_YF	ASS1	Y87	LFEDCYLLGTS	1	1.5999	0.491799	1.00758	0.566203	0.579757	0.0580056	1.1673	0.587528	1.38838	0.442757	2.09699	0.753241	0.751913	0.397716	1.49697	0.577452	0.894798	0.314098	1.14584	0.882014	0.572121	0.21939	0.716222	0.353031	0.441838	0.110438
816	ASS1_Y87_R86H	ASS1	Y87	LYEDHYLLGTS	2	2.72721	0.123279	1.86494	0.252111	1.18946	0.30857	1.09674	0.298996	2.17476	0.923812	1.65685	0.519722	16.0741	4.66439	1.36665	0.56639	0.688758	0.242335	0.972075	0.284802	12.2616	2.21547	3.04673	0.98733	2.08456	0.732492
817	ASS1_Y87_R86H_YF	ASS1	Y87	LFEDHYLLGTS	1	1.01156	0.0978081	0.782504	0.480429	0.56645	0.158189	0.661888	0.0789336	1.15366	0.352351	1.27497	0.833847	0.569312	0.101177	1.14993	0.15555	0.493927	0.0681598	0.706749	0.212143	0.617948	0.247002	0.585983	0.0476976	0.38374	0.0367332
818	ASS1_Y87_T91P	ASS1	Y87	LYEDRYLLGPS	2	1.49578	0.450901	2.29574	1.82566	4.13238	1.87265	0.683292	0.169994	0.812365	0.396542	1.19669	0.200884	5.42258	3.0582	1.66704	1.55854	1.20391	0.510138	1.15976	0.449729	3.51999	2.63493	1.39679	0.894062	0.898621	0.652136
819	ASS1_Y87_T91P_YF	ASS1	Y87	LFEDRYLLGPS	1	0.68949	0.137263	0.793127	0.145214	0.8045	0.289032	1.07027	0.331833	1.73418	0.313756	1.07483	0.277373	0.633721	0.31536	1.42112	0.546506	0.679474	0.0490262	1.12492	0.545107	0.857295	0.379026	0.872494	0.317627	0.580103	0.230495
820	ASS1_Y87_YF	ASS1	Y87	LFEDRYLLGTS	1	0.257655	0.0620933	1.2873	1.53703	1.1245	0.777577	0.409543	0.430509	0.8849	0.124424	2.20866	2.81045	1.11753	1.22767	1.79827	2.21529	1.25851	0.788301	2.45098	2.4283	2.80525	2.54561	1.97721	1.92893	0.862794	0.870561
821	ASTL_Y279	ASTL	Y279	RVLKLYGCSPS	1	0.516049	0.0387055	0.728035	0.303837	0.564168	0.302428	0.718577	0.270608	0.982965	0.343646	1.03278	0.204446	0.980911	0.517512	0.94346	0.278696	0.366626	0.0769855	0.608141	0.213086	0.634137	0.0317451	0.760755	0.261632	0.461198	0.244458
822	ASTL_Y279_K277Q	ASTL	Y279	RVLQLYGCSPS	1	1.37894	0.207914	1.54235	0.440906	2.3305	1.26401	1.37561	0.27505	1.48091	0.248721	1.68522	0.30256	1.15297	0.253867	1.72235	0.476314	1.05832	0.284829	1.25637	0.888871	1.29761	0.482252	1.71089	0.257661	0.576296	0.162653
823	ATM_Y1415	ATM	Y1415	KSPDSYQKILL	1	0.42864	0.0602743	0.37199	0.0869286	0.394835	0.0672858	0.569436	0.146555	0.711964	0.163402	0.549544	0.0949538	0.392789	0.159629	0.800894	0.269193	0.488308	0.0450413	0.450756	0.0321738	0.396595	0.0873639	0.437027	0.0977849	0.436969	0.0504661
824	ATM_Y1415_L1420F	ATM	Y1415	KSPDSYQKILF	1	0.632371	0.119138	0.483645	0.127044	0.405965	0.106899	0.51143	0.206995	0.600363	0.0807635	0.566939	0.157114	0.338389	0.144294	0.517368	0.181084	0.50877	0.219715	0.426931	0.0632492	0.468208	0.164252	0.464153	0.209598	0.585426	0.438032
825	ATM_Y1415_L1420P	ATM	Y1415	KSPDSYQKILP	1	0.388892	0.058785	0.427467	0.178907	0.359903	0.102618	0.431289	0.0903114	0.51851	0.100032	0.544139	0.138895	0.530613	0.212248	0.584381	0.161404	0.516766	0.347661	0.428888	0.098968	0.387152	0.124446	0.321008	0.0910466	0.413721	0.040888
826	ATM_Y1915	ATM	Y1915	LAVVDYMRRQK	1	0.552794	0.0385758	0.413443	0.077447	0.452685	0.138527	0.604326	0.18003	0.604834	0.319531	0.673868	0.206699	0.374485	0.109011	0.655169	0.218404	0.372538	0.099678	0.436815	0.0543201	0.285373	0.100647	0.337428	0.122923	0.513448	0.117371
827	ATM_Y1915_L1910H	ATM	Y1915	HAVVDYMRRQK	1	0.538915	0.283849	0.633868	0.484876	0.693869	0.193852	0.594571	0.214261	0.891885	0.441416	1.1577	0.355751	0.535333	0.327328	1.14392	0.578661	0.799127	0.190089	1.00147	0.442546	0.701434	0.598204	1.03414	0.743004	0.654032	0.156607
828	ATM_Y1915_M1916I	ATM	Y1915	LAVVDYIRRQK	1	1.20773	0.187313	0.64863	0.38608	0.749286	0.321343	1.37317	0.273848	0.855301	0.315595	1.05702	0.349209	0.838688	0.0876007	1.23951	0.343267	0.791381	0.311374	0.920109	0.289207	0.917556	0.451857	1.41478	0.515822	0.862712	0.366335
829	ATM_Y1915_V1913G	ATM	Y1915	LAVGDYMRRQK	1	0.503427	0.0808961	0.544736	0.20858	0.504373	0.220502	0.5548	0.160724	0.691331	0.286844	0.696495	0.274249	0.503663	0.0984151	0.734117	0.30545	0.436587	0.0467746	0.411089	0.0622512	0.441363	0.142681	0.41041	0.177256	0.475648	0.084813
830	ATM_Y2019	ATM	Y2019	EPDSLYGCGGG	1	2.32498	0.129719	2.05511	0.46014	2.94209	0.432359	1.03786	0.363452	1.10669	0.0379793	1.00957	0.218992	1.05715	0.197555	1.2573	0.203029	0.619158	0.164452	0.673804	0.161269	0.662592	0.286827	0.766051	0.203183	0.599984	0.11368
831	ATM_Y2019_D2016G	ATM	Y2019	EPGSLYGCGGG	1	0.918443	0.196399	0.850841	0.15017	2.1915	0.69025	0.583541	0.020718	0.706669	0.104239	0.769859	0.173852	0.818087	0.140006	0.802837	0.201154	0.52049	0.121609	0.566885	0.152709	0.547682	0.111669	0.526658	0.245913	0.634301	0.139772
832	ATM_Y2019_G2023R	ATM	Y2019	EPDSLYGCGRG	1	2.52015	0.190521	2.04588	0.242238	4.04023	0.502378	0.885314	0.127333	0.857797	0.125724	0.933146	0.373688	0.574278	0.124328	0.925549	0.0971183	0.399401	0.0873318	0.576325	0.259495	0.533808	0.170846	0.450379	0.0734484	0.419185	0.056328
833	ATM_Y2969	ATM	Y2969	PLKALYLQQRP	1	0.575901	0.191782	0.821781	0.388712	0.641877	0.31468	0.934265	0.160466	1.17411	0.394413	0.953781	0.124863	0.763533	0.141136	1.49309	0.617689	0.773757	0.231902	0.742623	0.302877	0.76601	0.339118	0.687014	0.134919	0.694771	0.0778014
834	ATM_Y2969_P2974L	ATM	Y2969	PLKALYLQQRL	1	0.459549	0.0522927	0.343076	0.195457	0.619943	0.245515	0.722393	0.162961	0.633588	0.126767	0.776379	0.415243	0.398012	0.290164	1.00598	0.322039	0.428576	0.134578	0.691692	0.208044	0.538937	0.211025	0.629394	0.424515	0.523338	0.138096
835	ATM_Y332	ATM	Y332	GSRGKYSSGFR	1	0.64924	0.148625	0.3796	0.161969	0.338005	0.165999	0.546583	0.109083	0.619745	0.0300698	0.511952	0.186414	0.792524	0.960765	0.603192	0.320325	0.656599	0.805539	0.452956	0.0859282	0.318409	0.0543676	0.359695	0.127072	0.559384	0.291199
836	ATM_Y332_R337C	ATM	Y332	GSRGKYSSGFC	1	0.47158	0.135412	0.463834	0.0910886	0.430642	0.10893	0.610723	0.150562	0.54503	0.112531	0.495272	0.115097	0.400533	0.0980215	0.559136	0.105988	0.446071	0.111119	0.538546	0.0589331	0.44052	0.134427	0.405663	0.0952218	0.510117	0.0999371
837	ATM_Y332_R337H	ATM	Y332	GSRGKYSSGFH	1	0.449688	0.109747	0.420779	0.0818031	0.391067	0.0814058	0.579062	0.143525	0.438841	0.0958461	0.464432	0.237322	0.40867	0.0278933	0.534589	0.135273	0.452148	0.121773	0.605457	0.4659	0.417328	0.145111	0.299631	0.048589	0.452069	0.106187
838	ATM_Y332_S333F	ATM	Y332	GSRGKYFSGFR	1	0.616423	0.134615	0.385737	0.0512527	0.351323	0.0296617	0.65733	0.194785	0.885308	0.557704	0.54683	0.188717	0.325285	0.106401	0.735999	0.213641	0.415462	0.194489	0.411956	0.0791483	0.424608	0.124707	0.39924	0.163773	0.481432	0.145056
839	ATM_Y332_Y332C	ATM	Y332	GSRGKCSSGFR	0	0.387199	0.0459828	0.394866	0.0706111	0.463689	0.152808	0.709263	0.221534	0.531629	0.0463927	0.470612	0.228438	0.433183	0.211234	0.557637	0.155833	0.402916	0.10169	0.422849	0.0768771	0.410303	0.108635	0.379056	0.102112	0.410528	0.0701441
840	ATM_Y54	ATM	Y54	SKQGKYLNWDA	1	0.445267	0.059265	0.396407	0.0612229	0.426702	0.112272	0.490615	0.075728	0.66579	0.0899985	0.789987	0.164823	0.454036	0.06829	0.856089	0.140811	0.436581	0.0621215	0.526569	0.130339	0.383759	0.0167301	0.506507	0.228329	0.398834	0.0651809
841	ATM_Y54_S49C	ATM	Y54	CKQGKYLNWDA	1	0.365628	0.117877	0.418143	0.141263	0.423145	0.142325	0.605329	0.124031	0.782493	0.291573	0.921449	0.339956	0.397161	0.119726	0.839371	0.120447	0.447469	0.024634	0.632394	0.198625	0.552269	0.0929185	0.493751	0.159336	0.389986	0.093589
842	ATP13A2_Y50	ATP13A2	Y50	WRVIGYHVVVW	1	0.50051	0.165974	0.444433	0.15833	0.56845	0.173026	0.902664	0.334394	1.19192	0.154396	1.21286	0.26151	0.587163	0.0576436	1.2507	0.166256	0.550914	0.0389154	0.828108	0.275021	0.69499	0.299808	0.692148	0.213494	0.417274	0.0300447
843	ATP13A2_Y50_G49S	ATP13A2	Y50	WRVISYHVVVW	1	0.630265	0.11102	0.453034	0.132176	0.543906	0.138372	1.03092	0.318766	1.26176	0.173036	1.19543	0.301336	0.546874	0.154004	1.46606	0.264355	0.554454	0.209132	0.825989	0.36659	0.582393	0.0589921	0.60991	0.155315	0.433635	0.0537419
844	ATP2A2_Y407	ATP2A2	Y407	VNCHQYDGLVE	1	0.531315	0.077058	0.626468	0.246207	0.651073	0.283301	0.672203	0.309746	0.847847	0.0937711	1.06115	0.247003	0.5983	0.0939539	1.20389	0.282787	0.613647	0.189532	0.818196	0.258119	0.658446	0.309082	0.658695	0.353847	0.498777	0.132377
845	ATP2A2_Y407_E412G	ATP2A2	Y407	VNCHQYDGLVG	1	0.558945	0.0681286	0.479989	0.133662	0.501684	0.165124	0.6843	0.150144	0.735511	0.0959094	0.930789	0.409913	0.517926	0.149161	0.846849	0.294096	0.55887	0.192456	0.672525	0.286271	0.433411	0.0300712	0.545974	0.247739	0.450748	0.146996
846	ATP2A2_Y497	ATP2A2	Y497	KSMSVYCTPNK	1	0.454616	0.0680112	0.698929	0.361027	1.003	0.540291	1.37744	0.680177	0.581319	0.200992	1.12973	0.573406	0.509059	0.134697	0.940181	0.289674	0.472519	0.0989471	0.632074	0.24655	0.696433	0.321715	0.701962	0.30203	0.652962	0.185709
847	ATP2A2_Y497_S495F	ATP2A2	Y497	KSMFVYCTPNK	1	0.49371	0.0904504	0.473232	0.101964	0.567701	0.216329	1.04557	0.239042	1.12191	0.107491	1.21726	0.169216	0.565359	0.135152	1.18923	0.131057	0.587336	0.102234	0.76827	0.206938	0.600009	0.15145	0.672626	0.211239	0.452305	0.0523079
848	ATP2A2_Y836	ATP2A2	Y836	WLFFRYLAIGC	1	0.432022	0.0614471	0.477127	0.160235	0.46202	0.103452	1.08856	0.303648	1.49428	0.272015	1.51071	0.522389	0.57296	0.24821	1.55177	0.373668	0.503441	0.112848	0.797767	0.234156	0.633177	0.173161	0.496361	0.140385	0.482317	0.1087
849	ATP2A2_Y836_A838P	ATP2A2	Y836	WLFFRYLPIGC	1	0.345217	0.0637944	0.380028	0.170302	0.477488	0.166134	0.656552	0.182964	1.14366	0.0479609	1.28582	0.179985	0.55916	0.113654	1.29631	0.143707	0.537709	0.0564921	0.777975	0.1457	0.529458	0.263994	0.531469	0.238009	0.415397	0.15092
850	ATP2C1_Y452	ATP2C1	Y452	IRKAEYPFSSE	1	0.364775	0.0698471	0.363196	0.0464703	0.403972	0.138776	0.453893	0.0746264	0.594295	0.0723026	0.595483	0.159471	0.366364	0.0985405	0.757553	0.159185	0.391631	0.0701968	0.423915	0.103365	0.414145	0.0850608	0.341334	0.0955034	0.340719	0.133342
851	ATP2C1_Y452_A450T	ATP2C1	Y452	IRKTEYPFSSE	1	0.428047	0.116604	0.401432	0.0668178	0.405326	0.0556012	0.548586	0.158752	0.598838	0.0544371	0.581691	0.154252	0.338924	0.137017	0.836894	0.0853384	0.465785	0.106204	0.449202	0.143072	0.425626	0.103279	0.397327	0.160088	0.348125	0.0627299
852	ATP5F1B_Y269	ATP5F1B	Y269	KVALVYGQMNE	1	1.96798	0.140969	1.473	0.74419	1.05405	0.653489	0.649807	0.0831486	0.769381	0.0806881	0.785457	0.0543339	0.524846	0.197825	1.13184	0.338309	0.443137	0.0523215	0.605988	0.16725	0.445669	0.139571	0.495494	0.146493	0.380258	0.0567573
853	ATP5F1B_Y269_E274Q	ATP5F1B	Y269	KVALVYGQMNQ	1	3.1735	0.0992485	2.15838	0.476436	1.78395	0.491701	0.828915	0.186133	0.840573	0.226768	0.726473	0.205341	0.506459	0.150701	1.26691	0.631582	0.424444	0.121437	0.633907	0.203358	0.496389	0.123827	0.641217	0.284186	0.425045	0.107999
854	ATP6V0A2_Y688	ATP6V0A2	Y688	VNRSGYTLIRK	1	0.43025	0.0465592	0.532927	0.171192	0.428697	0.060409	0.568218	0.110725	0.42891	0.269941	0.639939	0.196228	0.365763	0.087809	0.672381	0.229648	0.315006	0.087225	0.452051	0.033944	0.332934	0.0437651	0.443917	0.0784566	0.385513	0.0746819
855	ATP6V0A2_Y688_R685Q	ATP6V0A2	Y688	VNQSGYTLIRK	1	0.418287	0.0640935	0.386968	0.138196	0.475567	0.16818	0.391185	0.119791	0.537764	0.127462	0.572468	0.148407	0.401163	0.0737433	0.563377	0.16492	0.452448	0.149804	0.464504	0.0723425	0.419676	0.0786055	0.477524	0.169984	0.433249	0.110918
856	ATP6V0D2_Y271	ATP6V0D2	Y271	NVADHYGVYKP	2	4.88919	0.700309	5.54579	1.44022	3.70867	1.07871	0.587239	0.0849663	0.517255	0.163759	0.571156	0.0672063	0.424449	0.0735266	0.645017	0.0990561	0.461467	0.115451	0.451099	0.112527	0.401198	0.0880981	0.390648	0.130508	0.356338	0.0206672
857	ATP6V0D2_Y271_G272R	ATP6V0D2	Y271	NVADHYRVYKP	2	0.411816	0.0686502	0.500766	0.166634	0.383906	0.148668	0.702932	0.177015	0.561181	0.179088	0.721341	0.189572	0.432864	0.0581559	0.767104	0.0929177	0.489172	0.110649	0.478669	0.0687486	0.54039	0.257904	0.574442	0.332386	0.425575	0.0991695
858	ATP6V0D2_Y271_G272R_YF	ATP6V0D2	Y271	NVADHYRVFKP	1	0.471493	0.142684	0.390611	0.0868583	0.418305	0.0968413	0.686292	0.197099	0.58246	0.197792	0.708193	0.249414	0.404162	0.0664914	0.615567	0.175839	0.459021	0.109475	0.608168	0.137756	0.403742	0.131709	0.361109	0.081918	0.644124	0.33471
859	ATP6V0D2_Y271_YF	ATP6V0D2	Y271	NVADHYGVFKP	1	4.1447	0.436771	4.49276	1.03067	3.18142	0.533204	0.537736	0.0443407	0.404076	0.0154923	0.556809	0.079381	0.454848	0.122136	0.690653	0.24631	0.442737	0.103448	0.407515	0.0572219	0.300268	0.111156	0.44126	0.157962	0.43533	0.0862499
860	ATP6V1A_Y374	ATP6V1A	Y374	PADSGYPAYLG	2	0.592312	0.0819121	1.04581	0.58617	0.735139	0.434648	1.13673	0.63209	0.823001	0.175368	1.18116	0.176126	0.797584	0.299552	1.50695	0.69586	0.755102	0.357014	0.891817	0.482851	1.77448	1.95367	0.467837	0.300773	0.41747	0.0850722
861	ATP6V1A_Y374_D371G	ATP6V1A	Y374	PAGSGYPAYLG	2	0.4175	0.0985766	0.574036	0.364185	0.645205	0.491595	0.525076	0.187424	0.726681	0.128744	0.782349	0.583404	0.866164	0.729128	0.752391	0.306759	1.16966	0.829033	0.914269	0.608144	1.2184	0.764804	0.637955	0.662402	0.442306	0.183873
862	ATP6V1A_Y374_D371G_YF	ATP6V1A	Y374	PAGSGYPAFLG	1	0.734968	0.146546	0.478264	0.199859	0.626198	0.17068	0.869196	0.268386	0.686673	0.107988	1.00457	0.252688	0.511823	0.195221	1.13308	0.154437	0.737235	0.235406	0.793931	0.120346	0.633872	0.32047	1.17078	1.34873	0.469032	0.158946
863	ATP6V1A_Y374_YF	ATP6V1A	Y374	PADSGYPAFLG	1	0.77237	0.25547	1.04454	0.837783	0.959478	0.450619	1.12085	0.233366	1.10451	0.239726	1.71705	0.782767	0.759423	0.412284	1.88304	0.611777	0.981269	0.488019	1.36452	0.158908	1.5089	1.04198	0.600269	0.0781988	0.870363	0.447813
864	ATP6V1B1_Y462	ATP6V1B1	Y462	INQGPYENRSV	1	0.434586	0.0787945	0.380139	0.102767	0.422716	0.147528	0.475387	0.0971019	0.469823	0.0915243	0.558212	0.171399	0.400408	0.0372361	0.622105	0.149216	0.420964	0.035988	0.440894	0.142999	0.380866	0.0366623	0.568151	0.434465	0.379788	0.0834867
865	ATP6V1B1_Y462_R465H	ATP6V1B1	Y462	INQGPYENHSV	1	0.524249	0.0903047	0.470807	0.0838927	0.399706	0.0647466	0.53965	0.105434	0.680244	0.121255	0.646277	0.0749977	9.93993	0.719145	0.804404	0.200066	0.441022	0.134239	0.524337	0.0628284	0.435544	0.121365	0.638602	0.281329	0.550202	0.0944317
866	ATP7A_Y1459	ATP7A	Y1459	DRIVNYSRASI	1	0.370102	0.0642106	0.373933	0.0723425	0.405476	0.104054	0.585082	0.329798	0.480196	0.0856748	0.53779	0.0716892	0.410243	0.0791731	0.589064	0.15737	0.423314	0.0525976	0.42568	0.030206	0.431933	0.118586	0.399572	0.0507063	0.382526	0.0775263
867	ATP7A_Y1459_I1464V	ATP7A	Y1459	DRIVNYSRASV	1	0.46849	0.0417093	0.422584	0.103258	0.450061	0.0439174	0.562989	0.101157	0.731822	0.155088	0.701692	0.189715	0.448572	0.133944	0.790459	0.21665	0.467368	0.0828982	0.535012	0.170738	0.481632	0.134176	0.437509	0.142454	0.574053	0.213744
868	ATP7B_Y1078	ATP7B	Y1078	VAVTKYCKEEL	1	0.476848	0.0649896	0.454947	0.120467	0.593467	0.338534	0.650716	0.21354	0.843632	0.0953067	0.877496	0.158874	0.493721	0.108502	0.91706	0.161097	0.497501	0.0835484	0.776004	0.28968	0.508155	0.122882	0.547225	0.198315	0.370077	0.0572923
869	ATP7B_Y1078_A1074V	ATP7B	Y1078	VVVTKYCKEEL	1	0.491986	0.130733	0.567541	0.13025	0.546157	0.223662	0.872624	0.151316	0.967789	0.263587	1.08241	0.133874	0.553574	0.159746	1.37224	0.116233	0.580018	0.147601	0.824098	0.108954	0.639224	0.227695	0.65849	0.155148	0.446882	0.0608452
870	ATP7B_Y1078_L1083F	ATP7B	Y1078	VAVTKYCKEEF	1	0.462434	0.0319764	0.458564	0.144975	0.458136	0.146632	0.706818	0.223399	0.958982	0.152135	0.886517	0.139678	0.487231	0.0591205	1.05343	0.249067	0.563308	0.0607854	0.624324	0.129027	0.60522	0.225436	0.567535	0.217589	0.356746	0.0400379
871	ATP8B1_Y658	ATP8B1	Y658	TLCLCYKEIEE	1	0.624459	0.10201	0.521138	0.180079	0.733095	0.255995	0.886361	0.34058	1.35658	0.136658	1.63315	0.223443	0.704117	0.263608	1.95888	0.475624	0.592025	0.119568	1.05033	0.419826	1.05263	0.474553	0.824904	0.123928	0.617859	0.0897559
872	ATP8B1_Y658_I661T	ATP8B1	Y658	TLCLCYKETEE	1	0.617214	0.144559	0.708039	0.273909	0.647132	0.156507	1.2907	0.397556	1.53412	0.251837	1.41632	0.272074	0.736751	0.102958	1.64245	0.136761	0.572935	0.18427	0.903273	0.380067	0.878535	0.377222	0.749091	0.203561	0.483282	0.107722
873	ATR_Y317	ATR	Y317	NIEPVYLNMLL	1	6.42138	1.0671	6.87589	1.92176	5.47607	1.11254	4.48875	2.15232	1.3632	0.31929	1.57971	0.145512	10.4935	1.3419	1.48247	0.303691	8.64949	0.502751	5.80961	2.65678	6.94202	0.884521	5.01201	1.74234	3.45609	0.655522
874	ATR_Y317_V316I	ATR	Y317	NIEPIYLNMLL	1	6.60353	1.18998	8.3691	2.27254	6.91844	1.66401	15.1253	4.10033	1.42392	0.234613	1.84778	0.369694	13.2906	2.96014	3.20221	1.62234	10.7256	0.818849	7.79229	1.83319	13.8484	1.42979	14.5232	4.02475	6.84579	0.864745
875	ATRX_Y1849	ATRX	Y1849	CKLYQYYLDHL	3	2.05375	0.208437	0.587152	0.245192	0.697511	0.20681	1.16738	0.372501	1.5449	0.221184	1.73705	0.555159	0.757975	0.215593	1.64766	0.421601	1.43717	0.40268	1.53786	0.369573	2.18009	0.246952	1.53597	0.114196	2.12522	0.417782
876	ATRX_Y1849_Y1847C	ATRX	Y1849	CKLCQYYLDHL	2	1.57099	0.277189	0.515072	0.140741	0.437182	0.068028	0.593101	0.0828625	0.805521	0.31064	0.794844	0.0684267	0.423209	0.110736	0.778959	0.121845	0.578724	0.137831	0.613466	0.148825	0.672929	0.349728	0.418828	0.159663	0.419436	0.0548594
877	ATRX_Y1849_Y1847C_YF	ATRX	Y1849	CKLCQYFLDHL	1	0.766348	0.156105	0.449395	0.0749417	0.455663	0.072999	0.889643	0.397986	1.15596	0.466809	1.28465	0.390724	0.441812	0.0297805	1.18333	0.32019	0.688585	0.311748	0.661124	0.146451	0.571322	0.033359	0.611653	0.458935	0.489525	0.188883
878	ATRX_Y1849_YF	ATRX	Y1849	CKLFQYFLDHL	1	0.524136	0.0562706	0.536404	0.122142	0.585289	0.160798	0.932923	0.311324	1.30222	0.271424	1.36778	0.372907	0.634812	0.0676057	1.41204	0.276479	0.646772	0.183648	0.872964	0.168758	0.69285	0.187453	0.604714	0.139599	0.526375	0.104852
879	ATRX_Y203	ATRX	Y203	KNCFKYYMSDD	2	0.57249	0.0761562	0.540147	0.245011	0.595037	0.253314	0.961408	0.382939	1.15647	0.0741773	1.39969	0.139759	0.623738	0.22478	1.36803	0.161183	0.547171	0.144771	1.01305	0.279481	0.793948	0.320831	0.700775	0.305277	0.496085	0.131574
880	ATRX_Y203_C200S	ATRX	Y203	KNSFKYYMSDD	2	0.439946	0.0291291	0.468208	0.109929	0.476855	0.116697	0.671364	0.118688	0.947173	0.121768	0.920052	0.1694	0.405194	0.0825285	1.02358	0.0640819	0.48576	0.139399	0.603629	0.0630585	0.507206	0.132563	0.531058	0.172517	0.478618	0.0562676
881	ATRX_Y203_C200S_YF	ATRX	Y203	KNSFKYFMSDD	1	0.42467	0.0419194	0.39232	0.139524	0.477891	0.0415026	0.628422	0.0732455	0.869472	0.174531	0.856275	0.0950939	0.412283	0.0584481	1.02475	0.23435	0.416232	0.0454409	0.638077	0.17901	0.475253	0.124617	0.549805	0.2539	0.418495	0.0808558
882	ATRX_Y203_YF	ATRX	Y203	KNCFKYFMSDD	1	0.646078	0.122923	0.453289	0.154698	0.556217	0.113382	1.01666	0.27326	1.27518	0.339924	1.36843	0.357915	0.58883	0.108087	1.45432	0.163448	0.603797	0.259583	0.840152	0.164479	0.639223	0.19932	0.714358	0.267745	0.556273	0.105129
883	ATRX_Y204	ATRX	Y204	NCFKYYMSDDI	2	0.810866	0.164669	0.491109	0.143479	0.548221	0.20788	1.16723	0.576715	1.31683	0.133425	1.33115	0.32986	0.495827	0.0696739	1.51245	0.145924	0.959417	0.105821	0.931269	0.144146	0.748405	0.156118	0.624504	0.177455	0.562262	0.0771452
884	ATRX_Y204_C200S	ATRX	Y204	NSFKYYMSDDI	2	0.498741	0.0375829	0.434345	0.111789	0.443234	0.0671205	0.627405	0.162161	0.871334	0.106692	0.869631	0.130032	0.500639	0.170266	1.01031	0.15193	0.566753	0.135284	0.658594	0.0866995	0.502928	0.0514291	0.54159	0.187812	0.451006	0.0766284
885	ATRX_Y204_C200S_YF	ATRX	Y204	NSFKFYMSDDI	1	0.573988	0.130965	0.517316	0.137518	0.540333	0.104081	0.656608	0.177756	1.11834	0.386518	1.14294	0.165559	0.487845	0.0952091	1.285	0.211018	0.529736	0.0826505	0.692941	0.110651	0.559968	0.138394	0.551946	0.174284	0.497432	0.0495779
886	ATRX_Y204_YF	ATRX	Y204	NCFKFYMSDDI	1	0.447009	0.0620058	0.386298	0.0975238	0.511537	0.158158	0.950427	0.370177	1.17131	0.0905984	1.19952	0.169565	0.5214	0.0708767	1.23041	0.174587	0.564653	0.170076	0.745498	0.184713	0.604656	0.156997	0.530106	0.166682	0.393876	0.0222723
887	ATRX_Y2083	ATRX	Y2083	LRNIDYYRLDG	2	3.35355	0.553553	3.96213	0.758835	1.15886	0.498131	0.815268	0.216937	6.16762	1.45116	1.29564	0.524428	0.499027	0.165329	1.57871	1.33354	13.0624	3.71583	8.10956	3.30221	1.07294	0.310123	0.776438	0.277739	0.850744	0.254932
888	ATRX_Y2083_Y2084H	ATRX	Y2083	LRNIDYHRLDG	1	0.296741	0.056342	0.341684	0.0461248	0.329826	0.0306639	0.521284	0.10764	0.632231	0.0256003	0.497028	0.0873682	0.57098	0.435016	0.605532	0.0533552	0.51096	0.168488	0.617476	0.242387	0.419848	0.137499	0.404996	0.128812	0.378723	0.0611373
889	ATRX_Y2083_YF	ATRX	Y2083	LRNIDYFRLDG	1	3.73969	0.713935	2.7645	1.41747	1.6287	0.570477	5.38655	1.87808	26.8405	8.84663	3.7053	1.82242	1.70413	1.83773	4.08946	2.09675	21.5359	12.1651	10.8284	4.60645	2.9518	1.06643	3.05134	1.99748	3.41149	2.03513
890	AVPR2_Y117	AVPR2	Y117	CRAVKYLQMVG	1	0.400601	0.113017	0.405314	0.176578	0.504289	0.180742	0.521997	0.0983941	0.619236	0.132928	0.710695	0.161494	0.443128	0.205676	0.73919	0.22231	0.498764	0.0817181	0.574009	0.191409	0.607673	0.144009	0.439581	0.236682	0.378563	0.0838645
891	AVPR2_Y117_C112R	AVPR2	Y117	RRAVKYLQMVG	1	0.737056	0.105524	0.778455	0.090593	0.673597	0.341311	0.961096	0.592862	0.886566	0.132226	1.13374	0.630622	0.430595	0.187477	0.977731	0.175271	0.520286	0.273935	0.62938	0.205025	0.814979	0.324783	1.01086	0.55535	0.727082	0.27424
892	AVPR2_Y117_C112Y	AVPR2	Y117	YRAVKYLQMVG	2	0.360243	0.113822	0.396642	0.1643	0.584425	0.312664	0.621482	0.2011	0.766234	0.150711	0.950498	0.170209	0.429379	0.065373	0.827242	0.217401	0.551868	0.0941409	0.653061	0.128919	0.582336	0.187699	0.539049	0.195195	0.385254	0.0760564
893	AVPR2_Y117_C112Y_YF	AVPR2	Y117	FRAVKYLQMVG	1	0.496093	0.0946135	0.39669	0.0874679	0.319102	0.0719219	0.629224	0.172808	0.902148	0.116789	0.888511	0.262541	0.366294	0.0276937	1.26394	0.877123	0.386561	0.11105	0.518245	0.202735	0.508925	0.20063	0.393306	0.0779038	0.366393	0.132381
894	AVPR2_Y117_G122D	AVPR2	Y117	CRAVKYLQMVD	1	0.317549	0.0870428	0.502732	0.245304	0.456263	0.128158	0.535026	0.164004	0.675346	0.0895594	0.710301	0.141688	0.419447	0.111871	0.922177	0.161513	0.427415	0.113792	0.584625	0.13176	0.507609	0.161903	0.456191	0.199134	0.353835	0.0476198
895	AVPR2_Y117_G122R	AVPR2	Y117	CRAVKYLQMVR	1	0.400921	0.0709394	0.458625	0.075473	0.416621	0.0988343	0.732501	0.116531	1.20317	0.717885	0.882078	0.338579	0.454669	0.031545	0.877766	0.219907	0.435621	0.140919	0.526632	0.0679669	0.499071	0.120016	0.467415	0.176636	0.330921	0.0633199
896	AVPR2_Y117_R113W	AVPR2	Y117	CWAVKYLQMVG	1	0.434409	0.0614569	0.412787	0.155864	0.466334	0.184983	0.817133	0.295806	1.26352	0.187846	1.37261	0.214333	0.503966	0.0812279	1.38596	0.240439	0.495312	0.101996	0.702532	0.158192	0.622081	0.197379	0.83232	0.412778	0.386005	0.110757
897	AVPR2_Y124	AVPR2	Y124	QMVGMYASSYM	2	1.45342	0.251526	1.10697	0.853097	1.30038	0.648337	0.921314	0.358192	0.659427	0.258049	1.26748	0.440786	1.07121	0.205189	1.07413	0.491134	0.61103	0.19336	0.783118	0.417727	1.20608	0.0786584	1.09424	0.228569	2.73805	0.89146
898	AVPR2_Y124_G122D	AVPR2	Y124	QMVDMYASSYM	2	1.28866	0.185768	0.876036	0.482582	1.57658	0.6808	0.890506	0.15135	0.90548	0.287811	1.21797	0.448345	0.630626	0.156114	1.43208	0.371886	0.579492	0.0960831	0.815192	0.180214	0.558367	0.182412	0.571045	0.240427	0.842062	0.384976
899	AVPR2_Y124_G122D_YF	AVPR2	Y124	QMVDMYASSFM	1	2.34127	0.542413	1.35031	0.58912	1.57969	0.327482	1.20033	0.158956	1.46941	0.153401	1.28925	0.317317	0.899714	0.274869	1.30798	0.593809	0.778709	0.248611	0.923286	0.357056	0.991674	0.248442	0.805386	0.240462	0.707253	0.201498
900	AVPR2_Y124_G122R	AVPR2	Y124	QMVRMYASSYM	2	0.464347	0.166298	0.556532	0.342309	0.621172	0.352709	0.674681	0.186952	0.764159	0.246301	1.3123	0.798634	0.716901	0.201336	1.27918	0.319774	0.622214	0.261585	0.987803	0.112668	0.84193	0.520757	0.78722	0.541324	0.659276	0.678032
901	AVPR2_Y124_G122R_YF	AVPR2	Y124	QMVRMYASSFM	1	0.327599	0.0888111	0.605344	0.298267	0.424753	0.161886	0.745361	0.164117	0.768673	0.0339376	1.25599	0.500349	0.482294	0.117461	0.843257	0.373685	0.605019	0.260334	0.676779	0.202603	0.589786	0.196776	0.552078	0.401986	0.543954	0.212449
902	AVPR2_Y124_M123K	AVPR2	Y124	QMVGKYASSYM	2	0.459122	0.194072	0.528854	0.31666	0.379208	0.191429	0.786259	0.347372	0.717011	0.0735486	0.625503	0.293045	0.265866	0.0258145	0.736175	0.258791	0.290069	0.179319	0.451643	0.241634	0.336486	0.110163	0.400768	0.165399	0.475242	0.122746
903	AVPR2_Y124_M123K_YF	AVPR2	Y124	QMVGKYASSFM	1	0.635002	0.156091	0.564194	0.2842	0.412746	0.161847	1.15233	0.58667	0.773943	0.0717678	0.612593	0.15691	0.431406	0.314114	0.991998	0.400681	0.515813	0.220867	0.625979	0.281653	0.77205	0.382889	0.341487	0.10378	0.642243	0.206196
904	AVPR2_Y124_S126F	AVPR2	Y124	QMVGMYAFSYM	2	1.34953	0.126371	1.54719	0.583276	1.51816	0.627146	1.27257	0.304218	1.44427	0.341721	2.24454	0.493687	4.47036	0.548258	1.85909	0.340262	0.803768	0.123469	1.15114	0.445859	2.44966	0.699633	1.84485	0.57036	6.64983	0.912845
905	AVPR2_Y124_S126F_YF	AVPR2	Y124	QMVGMYAFSFM	1	1.28222	0.404546	1.15759	0.530384	1.06252	0.63589	0.911777	0.366271	1.14883	0.0491951	1.49895	0.246226	3.54396	0.351305	1.65347	0.368044	0.846222	0.0907849	1.63177	0.959007	1.94632	1.07359	3.07784	4.08239	5.80235	1.43031
906	AVPR2_Y124_S127F	AVPR2	Y124	QMVGMYASFYM	2	6.91955	1.42363	7.84798	4.42654	5.45941	4.11717	3.60597	2.29228	1.79256	0.0403844	1.34619	0.512468	3.65034	1.90642	1.64818	0.814002	0.450047	0.35573	0.999888	0.544307	2.4926	1.40587	1.91523	0.81841	4.41069	1.70661
907	AVPR2_Y124_S127F_YF	AVPR2	Y124	QMVGMYASFFM	1	8.12801	1.60234	9.80385	3.09058	5.8164	1.2188	4.7237	3.91573	2.02898	0.181701	1.88389	0.482835	5.31255	1.27464	2.03214	0.911118	0.676083	0.243909	1.50145	1.13975	3.05909	0.697583	2.26613	0.664728	5.37973	0.715037
908	AVPR2_Y124_Y128S	AVPR2	Y124	QMVGMYASSSM	1	0.567432	0.16772	0.438382	0.0877371	0.766466	0.191975	0.80724	0.266363	0.63482	0.277007	0.647336	0.225931	0.472392	0.464699	0.645029	0.244108	0.476975	0.204947	0.435477	0.152436	0.72971	0.285951	0.402559	0.100993	0.503838	0.335336
909	AVPR2_Y124_YF	AVPR2	Y124	QMVGMYASSFM	1	1.59712	0.159659	1.58987	0.554242	1.34026	0.380101	1.48439	0.655193	1.20685	0.831618	0.980681	0.335002	0.904215	0.292881	1.0745	0.266913	0.729574	0.419049	0.78152	0.219794	0.922146	0.210139	0.914338	0.373673	2.30571	0.873108
910	AXL_Y115	AXL	Y115	SDTGQYQCLVF	1	1.64436	0.15218	2.03151	0.534932	3.09233	0.716583	1.85972	0.718582	0.968744	0.0393247	1.33394	0.201577	2.70417	0.47779	1.26381	0.12699	1.64831	0.757442	1.64892	0.599045	0.867475	0.104981	0.899888	0.281288	1.77492	0.384289
911	AXL_Y115_T112M	AXL	Y115	SDMGQYQCLVF	1	1.97113	0.207978	2.35043	0.713059	3.13948	0.936221	1.57193	0.997607	0.932793	0.145268	1.30323	0.223162	3.3792	0.979397	1.22052	0.134614	2.04986	1.21734	1.89252	0.83795	0.923088	0.297465	0.990555	0.24461	1.83954	0.533963
912	B3GALNT1_Y269	B3GALNT1	Y269	KFEDVYVGICL	1	2.91765	0.618644	3.05857	0.215942	1.99314	0.264943	1.02214	0.429507	1.15578	0.055669	1.36698	0.110168	2.51807	0.38048	1.33546	0.245019	1.2322	0.420793	1.23978	0.165093	0.857168	0.194424	0.714748	0.0952655	0.592131	0.159098
913	B3GALNT1_Y269_E266A	B3GALNT1	Y269	KFADVYVGICL	1	1.12204	0.174758	0.786921	0.139857	0.85031	0.291474	1.29033	0.81974	1.20452	0.0644375	1.45564	0.377628	0.978026	0.414404	1.3437	0.411793	0.65013	0.0400682	0.908803	0.321743	0.846345	0.378983	0.987817	0.747287	0.522277	0.0935012
914	B3GALNT1_Y269_G271R	B3GALNT1	Y269	KFEDVYVRICL	1	0.544561	0.102447	0.45175	0.17715	0.479058	0.130128	1.027	0.310147	1.2847	0.16026	1.63898	0.88473	0.593468	0.105067	1.38321	0.304233	0.512426	0.104468	0.926486	0.295365	0.655289	0.267705	0.581613	0.173862	0.435679	0.0425407
915	B4GALNT2_Y538	B4GALNT2	Y538	ALEKTYNTYRS	2	0.924545	0.145302	0.516932	0.230607	0.438372	0.0919222	0.432807	0.101087	0.497182	0.0473957	0.568219	0.145031	0.350252	0.0888191	0.65825	0.225395	0.39123	0.0980484	0.438554	0.110244	0.336295	0.0329635	0.348558	0.0375805	0.312459	0.0426287
916	B4GALNT2_Y538_A533D	B4GALNT2	Y538	DLEKTYNTYRS	2	1.03063	0.145142	0.844659	0.427885	0.760512	0.305324	0.44076	0.0901177	0.822746	0.21482	0.847979	0.165606	0.401359	0.0747991	0.787906	0.191185	0.553884	0.124978	0.702993	0.185141	0.381519	0.0461271	0.508886	0.216287	0.424101	0.180687
917	B4GALNT2_Y538_A533D_YF	B4GALNT2	Y538	DLEKTYNTFRS	1	1.7523	0.172695	0.966995	0.543422	0.733995	0.475187	0.522851	0.115035	0.735568	0.220886	0.65569	0.258566	0.390821	0.115069	0.851158	0.166748	0.430869	0.159123	0.550483	0.104399	0.445214	0.162371	0.318937	0.0717732	0.2913	0.114718
918	B4GALNT2_Y538_YF	B4GALNT2	Y538	ALEKTYNTFRS	1	1.78413	0.256422	0.776864	0.186434	0.704344	0.22951	0.502725	0.0800386	0.73021	0.218389	0.573375	0.154387	0.421963	0.0851936	0.508539	0.159131	0.433337	0.173085	0.455644	0.133387	0.350515	0.221509	0.405957	0.141221	0.381606	0.0728152
919	B4GALT4_Y113	B4GALT4	Y113	VSRGRYRPQEC	1	0.656516	0.163701	0.573637	0.157001	0.489608	0.0755975	0.545385	0.103134	0.654584	0.199761	0.754251	0.267243	0.541865	0.134225	0.642589	0.238141	0.475293	0.0639776	0.514968	0.125375	0.527094	0.0536935	0.47555	0.124131	0.574921	0.0417431
920	B4GALT4_Y113_Q116E	B4GALT4	Y113	VSRGRYRPEEC	1	0.562072	0.0527905	0.47175	0.18099	0.522286	0.219326	0.568137	0.120327	0.560993	0.202309	0.692483	0.2673	0.519893	0.139589	0.51168	0.14636	0.438909	0.0556058	0.524265	0.118225	0.443105	0.165995	0.509736	0.130346	0.614312	0.121219
921	B4GALT6_Y382	B4GALT6	Y382	APIEDYGGGGG	1	0.44889	0.0496091	0.566152	0.203803	0.508885	0.142815	0.661141	0.184052	0.793884	0.0373892	0.871684	0.0775433	0.504718	0.0941853	0.965258	0.292514	0.523442	0.126887	0.696746	0.268517	0.649082	0.287207	0.598964	0.183246	0.460836	0.121091
922	B4GALT6_Y382_I379V	B4GALT6	Y382	APVEDYGGGGG	1	0.392147	0.0636597	0.495596	0.147412	0.451963	0.123209	0.480928	0.136326	0.619719	0.0745058	0.822426	0.283973	0.408896	0.092077	0.881776	0.30978	0.472632	0.174637	0.641124	0.209823	0.502933	0.0961116	0.552275	0.396326	0.417933	0.0356833
923	BACE1_Y260	BACE1	Y260	RREWYYEVIIV	2	0.635209	0.199905	0.571284	0.254298	0.717951	0.367297	0.770577	0.33117	0.389154	0.215038	0.874356	0.44772	0.835021	0.0411148	0.750838	0.216459	2.85065	0.873184	2.02585	0.903074	0.516348	0.192933	0.7253	0.51579	0.832202	0.31239
924	BACE1_Y260_V265A	BACE1	Y260	RREWYYEVIIA	2	0.926188	0.568231	0.462017	0.29719	0.513238	0.309717	0.542182	0.152834	1.25893	0.334388	1.30199	0.424987	0.763545	0.307454	0.733422	0.274227	4.46985	2.00725	2.89606	1.40397	0.539373	0.317733	0.441629	0.340586	1.51735	0.336058
925	BACE1_Y260_V265A_YF	BACE1	Y260	RREWFYEVIIA	1	0.497972	0.0879476	0.593058	0.312693	0.597544	0.33822	0.482665	0.269997	0.807393	0.316933	0.927265	0.177595	0.660257	0.279286	0.732702	0.49837	0.783512	0.16757	0.763686	0.155134	0.51513	0.251228	0.390909	0.256518	1.24142	0.208153
926	BACE1_Y260_YF	BACE1	Y260	RREWFYEVIIV	1	0.514772	0.354982	0.649039	0.36935	0.561462	0.583106	0.766337	0.376959	0.881698	0.520181	1.53536	1.1963	1.88597	1.15485	4.80485	9.58526	0.605106	0.353075	0.504817	0.375858	0.927967	0.799099	0.371587	0.276254	2.28142	1.29659
927	BAD_Y110	BAD	Y110	WAAQRYGRELR	1	0.4869	0.052773	0.445427	0.0632093	0.476005	0.108377	0.59914	0.191049	0.781704	0.570201	0.88713	0.561801	0.398252	0.0725574	0.741978	0.194392	0.464125	0.0736967	0.395756	0.0913733	0.405708	0.135475	0.433104	0.140613	0.514354	0.193247
928	BAD_Y110_A107S	BAD	Y110	WASQRYGRELR	1	0.501236	0.103218	0.623782	0.221583	0.399743	0.107903	0.727873	0.154538	0.643783	0.158566	0.621314	0.255668	0.331908	0.0988253	0.840455	0.348003	0.389812	0.0924661	0.414498	0.0954731	0.483859	0.153051	0.537554	0.272572	0.516144	0.2134
929	BAG3_Y114	BAG3	Y114	HPFHVYPQPGM	1	0.465456	0.171596	0.803755	0.318762	0.683754	0.350344	0.937787	0.498291	0.544502	0.0857173	0.873123	0.507385	0.499301	0.119708	0.852263	0.152193	0.748946	0.429465	0.997532	0.242541	1.01762	0.759033	1.00777	0.532136	0.585246	0.114671
930	BAG3_Y114_P115S	BAG3	Y114	HPFHVYSQPGM	1	0.937322	0.330091	1.23787	0.377548	1.73642	0.737145	0.847235	0.296147	0.983878	0.220066	1.77898	0.921524	0.718597	0.11732	1.38592	0.423139	0.752803	0.233805	0.907514	0.449205	0.649415	0.332776	0.944683	0.286632	0.803854	0.154916
931	BAG3_Y205	BAG3	Y205	QLPRGYISIPV	1	0.591847	0.155434	0.839477	0.622216	0.717834	0.0751464	0.867479	0.0992245	0.880883	0.158099	0.789413	0.0823372	0.641794	0.40215	0.973844	0.305684	0.481759	0.118197	0.743812	0.175353	0.697562	0.302504	0.722467	0.266468	0.611641	0.179012
932	BAG3_Y205_P209L	BAG3	Y205	QLPRGYISILV	1	0.479206	0.0868314	0.562652	0.130477	0.674576	0.259962	0.80638	0.449554	1.07035	0.2965	1.10808	0.257989	0.662613	0.298589	1.38277	0.426688	0.588842	0.237433	0.747686	0.427827	0.583063	0.272058	0.848373	0.256564	0.611038	0.240956
933	BAG3_Y451	BAG3	Y451	KTDKKYLMIEE	1	0.532185	0.0881386	0.477055	0.104996	0.515882	0.116993	0.806509	0.159201	0.959891	0.133691	0.866746	0.228989	0.646625	0.384445	1.11401	0.173919	0.462936	0.120183	0.745977	0.322775	0.436144	0.116707	0.635152	0.223102	0.424072	0.0667394
934	BAG3_Y451_E455K	BAG3	Y451	KTDKKYLMIKE	1	0.391727	0.0421392	0.367696	0.0855423	0.368194	0.0752778	0.616146	0.0984961	0.63642	0.117112	0.640098	0.0924746	0.37329	0.0388651	0.877355	0.0597346	0.422954	0.178604	0.526096	0.170285	0.426432	0.0526145	0.439424	0.140836	0.40808	0.0802381
935	BAG3_Y457	BAG3	Y457	LMIEEYLTKEL	1	1.18386	0.499385	0.723249	0.356235	0.684714	0.408818	1.42126	1.05067	2.82948	0.244446	2.2289	1.32646	0.629142	0.190454	2.04365	0.989752	0.758885	0.302726	1.14146	0.525852	0.911268	0.217324	0.992971	0.485406	0.872488	0.364454
936	BAG3_Y457_E455K	BAG3	Y457	LMIKEYLTKEL	1	0.352641	0.0825534	0.469121	0.0968879	0.571015	0.240456	0.6661	0.382675	0.896286	0.0910129	0.867183	0.311003	0.491215	0.327605	1.35798	0.601836	0.437381	0.138352	0.72027	0.425655	0.524163	0.354902	0.611515	0.388051	0.410791	0.243733
937	BAG3_Y457_L462P	BAG3	Y457	LMIEEYLTKEP	1	1.48578	0.148192	0.600205	0.310962	1.49659	1.41724	2.45104	0.211867	2.78433	0.637168	2.04883	1.13745	0.744678	0.254392	2.50607	0.939505	1.19564	1.02927	1.88385	1.03696	1.14484	0.525398	0.975076	0.567148	1.12537	0.527648
938	BAG3_Y93	BAG3	Y93	QLRPGYIPIPV	1	0.733778	0.0907766	0.735599	0.350619	0.639153	0.258559	0.795541	0.253298	1.0799	0.308601	0.952933	0.296229	0.645025	0.141099	0.914659	0.343105	0.735215	0.321534	1.09395	0.61621	0.774275	0.204684	0.591712	0.139226	0.772312	0.0650316
939	BAG3_Y93_I94F	BAG3	Y93	QLRPGYFPIPV	1	0.422868	0.0824131	0.536002	0.200717	0.466148	0.0611935	0.529853	0.0154807	0.981202	0.111814	0.600025	0.171632	0.420083	0.209448	0.679408	0.215498	0.592737	0.228452	0.559551	0.165565	0.448243	0.373862	0.58512	0.318153	0.531195	0.160183
940	BAP1_Y223	BAP1	Y223	TAGEPYHDIRF	1	0.618939	0.172598	0.497605	0.105859	0.489417	0.231747	0.428914	0.158638	0.639793	0.035416	0.820847	0.202522	0.523226	0.225272	0.744329	0.300016	1.53574	0.816682	1.29434	0.724535	0.554883	0.200153	0.446265	0.134508	0.42626	0.0912876
941	BAP1_Y223_R227C	BAP1	Y223	TAGEPYHDICF	1	0.463392	0.0772074	0.629353	0.237214	0.67117	0.132119	0.987369	0.610532	0.962734	0.19452	1.03899	0.264002	0.656084	0.0991626	1.14965	0.103518	1.99265	1.08419	1.84922	0.992559	0.658629	0.203428	0.531419	0.0880184	0.445674	0.0943749
942	BARD1_Y156	BARD1	Y156	SKKVRYVVSKA	1	0.341158	0.0453828	0.365646	0.162799	0.372183	0.111555	0.538269	0.096693	0.481904	0.139988	0.47443	0.0989892	0.359572	0.140415	0.569203	0.125283	0.291982	0.072922	0.402322	0.0675957	0.308938	0.0378363	0.334074	0.155891	0.312412	0.0233712
943	BARD1_Y156_K153E	BARD1	Y156	SKEVRYVVSKA	1	0.411757	0.00586013	0.370565	0.061449	0.414735	0.0437223	0.485285	0.0988667	0.477883	0.0507778	0.59325	0.119301	0.381097	0.0625612	0.671462	0.108129	0.462991	0.183436	0.437946	0.116621	0.362716	0.0362567	0.388002	0.105174	0.397793	0.0176484
944	BBS10_Y536	BBS10	Y536	NRLTDYYEPLL	2	1.32959	0.151543	1.03369	0.68902	3.28246	0.526852	1.61474	0.686484	1.62703	0.21351	2.64296	1.50332	2.10668	0.539023	0.826004	0.143432	10.9793	0.969458	7.93395	1.69075	8.92427	1.8629	6.55343	1.78992	3.60033	0.262997
945	BBS10_Y536_P539L	BBS10	Y536	NRLTDYYELLL	2	1.6849	0.155415	1.09821	0.283525	1.45688	0.343606	1.14574	0.46196	1.68019	0.32609	1.64066	0.207681	1.98385	0.38013	1.17063	0.156557	11.9206	3.29059	10.0599	2.39903	2.43774	0.258925	1.65635	0.42655	3.03665	0.205593
946	BBS10_Y536_P539L_YF	BBS10	Y536	NRLTDYFELLL	1	0.61851	0.0896041	0.62164	0.205771	0.509029	0.169872	0.764662	0.423669	1.34892	0.174905	1.35867	0.381454	0.533593	0.115978	1.30624	0.377088	7.17221	1.08848	5.00345	2.44003	0.653519	0.265653	0.632567	0.335004	0.442453	0.0866813
947	BBS10_Y536_YF	BBS10	Y536	NRLTDYFEPLL	1	0.406397	0.0327141	0.754591	0.389016	0.547846	0.13832	0.674764	0.153933	0.959481	0.185752	1.71104	0.595802	0.467722	0.0327072	0.993446	0.283845	6.98977	1.57965	4.37479	2.57156	2.53954	0.532224	1.1614	0.389343	0.380854	0.0134192
948	BBS2_Y644	BBS2	Y644	TMKSRYMELYD	2	0.730062	0.0403452	0.475497	0.135361	0.694023	0.243832	0.623816	0.191262	0.808239	0.14074	0.811742	0.097509	0.42559	0.0693766	0.868139	0.0997027	0.488669	0.154579	0.555786	0.130392	0.535226	0.0891408	0.607941	0.274502	0.455846	0.108659
949	BBS2_Y644_R643H	BBS2	Y644	TMKSHYMELYD	2	1.19478	0.298594	0.689523	0.154319	0.952971	0.422739	0.693432	0.173372	0.863848	0.155517	0.807281	0.183613	0.452782	0.0934171	1.01456	0.20825	0.568234	0.097867	0.63951	0.122348	0.970804	0.477298	0.683404	0.281562	1.3382	0.255085
950	BBS2_Y644_R643H_YF	BBS2	Y644	TMKSHYMELFD	1	0.430639	0.0660635	0.510264	0.198848	0.601111	0.24267	0.57243	0.110388	0.771563	0.214522	1.1055	0.335487	0.546925	0.11757	0.966325	0.16784	0.707611	0.216557	0.720072	0.0849855	0.76431	0.178737	0.581805	0.194527	0.892699	0.14877
951	BBS2_Y644_YF	BBS2	Y644	TMKSRYMELFD	1	0.417824	0.106171	0.446767	0.128629	0.479547	0.187279	0.612826	0.130223	0.709831	0.0370168	0.765405	0.102669	0.381798	0.0336248	0.913736	0.140221	0.481548	0.103628	0.667398	0.154558	0.523493	0.106223	0.43734	0.10478	0.420323	0.0821965
952	BBS2_Y648	BBS2	Y648	RYMELYDLNRD	2	4.489	0.418287	1.67253	1.10601	1.89157	0.822308	0.992832	0.303306	1.39801	0.129019	1.40555	0.197465	1.14264	0.662239	1.40589	0.424275	1.03891	0.315828	1.24245	0.383959	1.51795	0.905091	1.05433	0.537771	1.31892	0.259292
953	BBS2_Y648_R643H	BBS2	Y648	HYMELYDLNRD	2	6.39737	1.01366	2.57919	0.751186	2.8936	0.776472	0.862174	0.127708	1.21482	0.441571	1.50373	0.432123	1.28211	0.467823	1.22268	0.138337	3.57065	1.93803	2.93749	1.36812	2.98011	1.22537	1.44846	0.687096	4.26195	0.717163
954	BBS2_Y648_R643H_YF	BBS2	Y648	HFMELYDLNRD	1	4.63626	0.227432	1.3811	0.705992	1.47569	0.890607	0.943462	0.486309	1.27711	0.32422	1.10194	0.442569	0.783615	0.160853	1.17798	0.300588	0.497344	0.135841	0.722953	0.281905	0.625353	0.250079	0.594098	0.0911318	0.563145	0.173658
955	BBS2_Y648_YF	BBS2	Y648	RFMELYDLNRD	1	2.03808	0.0412875	1.24905	0.958529	1.13878	0.74795	0.55602	0.171588	0.909096	0.0407294	1.28234	0.575227	0.702919	0.363771	1.27583	0.558835	0.761992	0.254851	0.882818	0.344759	0.609765	0.282574	0.812445	0.778851	0.458767	0.213249
956	BBS4_Y395	BBS4	Y395	NALAQYQEMEK	1	0.366234	0.118251	0.545312	0.141001	0.612284	0.203941	0.511708	0.0676153	0.713665	0.339112	1.10354	0.212323	0.454217	0.181158	0.966777	0.292902	0.594387	0.167064	0.658479	0.338877	0.465708	0.148138	0.471084	0.376421	0.467384	0.118179
957	BBS4_Y395_A393V	BBS4	Y395	NALVQYQEMEK	1	0.50656	0.083369	0.529522	0.209638	0.568531	0.22277	0.620132	0.163415	1.01683	0.296746	0.97843	0.223138	0.509264	0.0662439	1.02446	0.229994	0.561567	0.0854871	0.72114	0.132272	0.507076	0.13957	0.503127	0.110155	0.458805	0.0926123
958	BBS4_Y43	BBS4	Y43	LIHLHYIRKDY	2	0.392912	0.0601407	0.548356	0.19803	0.443505	0.21155	0.63167	0.142359	0.856867	0.170031	1.21294	0.324311	0.447161	0.139047	1.13846	0.130006	0.517408	0.10457	0.762835	0.281367	0.601677	0.318242	0.629847	0.270805	0.376645	0.0745877
959	BBS4_Y43_K46R	BBS4	Y43	LIHLHYIRRDY	2	0.388135	0.114365	0.388617	0.0292999	0.470096	0.109855	0.524014	0.175314	0.561568	0.361788	0.951903	0.245465	0.410149	0.0620259	0.773215	0.223683	0.416667	0.121354	0.759369	0.523913	0.334401	0.131329	0.526198	0.156327	0.523944	0.0193605
960	BBS4_Y43_K46R_YF	BBS4	Y43	LIHLHYIRRDF	1	0.447629	0.164473	0.503479	0.238056	0.58132	0.301462	0.332564	0.0527836	0.972194	0.870958	1.10326	0.534434	0.563656	0.386847	1.01759	0.407013	0.52077	0.219362	0.732458	0.265037	0.669113	0.297989	0.706938	0.60229	0.419065	0.22061
961	BBS4_Y43_YF	BBS4	Y43	LIHLHYIRKDF	1	0.526804	0.107037	0.871082	0.554467	0.637468	0.222767	0.611532	0.46488	0.786728	0.0678517	1.50566	0.657953	0.983937	0.713487	1.17793	0.250763	0.937258	0.410281	1.2167	0.782683	1.17372	0.629727	1.01445	0.704511	0.470693	0.223803
962	BBS4_Y48	BBS4	Y48	YIRKDYEACKA	2	0.386253	0.111167	0.444619	0.189241	0.403716	0.0748493	0.373592	0.0772387	0.406845	0.151151	0.552801	0.29094	0.402851	0.0371318	0.463618	0.279326	0.466352	0.0794677	0.379808	0.162146	0.468731	0.0864147	0.39837	0.143651	0.397565	0.0473424
963	BBS4_Y48_K46R	BBS4	Y48	YIRRDYEACKA	2	0.705503	0.140571	0.572069	0.115893	0.508631	0.0778345	0.639927	0.203306	0.749708	0.1753	0.765466	0.308645	0.426081	0.0974714	0.806931	0.172312	0.632585	0.145936	0.578293	0.16344	0.896564	0.428609	0.685408	0.232796	0.435001	0.105075
964	BBS4_Y48_K46R_YF	BBS4	Y48	FIRRDYEACKA	1	0.615675	0.181765	0.525309	0.216271	0.44196	0.167514	0.548947	0.210829	0.573112	0.227482	0.761151	0.349746	0.434312	0.141504	0.75828	0.179883	0.449916	0.162812	0.493588	0.0731134	0.513906	0.20763	0.590279	0.194423	0.399522	0.14052
965	BBS4_Y48_YF	BBS4	Y48	FIRKDYEACKA	1	0.47909	0.262743	0.444721	0.0468398	0.395527	0.12327	0.726376	0.201084	0.740851	0.155151	0.641584	0.0795822	0.490313	0.0924555	0.865044	0.233328	0.502321	0.0977315	0.59245	0.110124	0.650868	0.109484	0.516459	0.131521	0.333579	0.0985189
966	BCAR1_Y410	BCAR1	Y410	VDSGVYAVPPP	1	4.93584	0.279678	8.70418	3.82659	8.01629	3.91779	20.8763	6.86254	0.709311	0.0502261	2.04113	0.991346	5.4551	1.39839	0.794897	0.105325	1.20223	0.265118	1.01469	0.248502	7.5366	2.68139	19.6025	7.13211	9.96861	1.19356
967	BCAR1_Y410_S407T	BCAR1	Y410	VDTGVYAVPPP	1	4.88663	0.360605	8.60178	2.89853	7.67256	2.69081	20.7214	5.22731	0.827362	0.0915547	2.38686	1.37994	5.77051	0.977194	0.798634	0.0755495	1.28358	0.22634	1.13929	0.327519	8.36315	3.15195	20.204	6.47554	9.22131	1.08682
968	BCCIP_Y257	BCCIP	Y257	EEEFFYEKAIL	1	0.890355	0.158368	0.632863	0.273151	0.811113	0.273119	1.10548	0.0855957	1.33635	0.108448	1.93217	0.334625	5.33737	0.452346	1.55245	0.588858	0.671491	0.112417	0.895048	0.24322	0.621602	0.106073	0.648209	0.189903	0.846555	0.213278
969	BCCIP_Y257_E254Q	BCCIP	Y257	EEQFFYEKAIL	1	0.607747	0.161853	0.466047	0.200902	0.653788	0.310888	0.74805	0.197055	0.827786	0.151342	1.11325	0.325673	3.961	0.505224	0.999172	0.139301	0.442372	0.0815006	0.587729	0.135282	0.433743	0.141218	0.479796	0.0852617	0.501731	0.0921163
970	BCHE_Y174	BCHE	Y174	VVSMNYRVGAL	1	0.342035	0.0543595	0.335683	0.163709	0.429773	0.0703445	0.555902	0.0535234	0.721954	0.0700612	0.70334	0.0559386	0.332765	0.0580263	0.80219	0.0610967	0.52427	0.189542	0.533711	0.0480956	0.511249	0.142594	0.445036	0.121969	0.361734	0.0784216
971	BCHE_Y174_V170M	BCHE	Y174	VMSMNYRVGAL	1	0.484485	0.0266075	0.462259	0.203076	0.447286	0.0846858	0.686473	0.103195	0.715286	0.157274	0.767281	0.102032	0.438257	0.0906008	0.878237	0.189936	0.485198	0.0832436	0.573239	0.0892387	0.577575	0.100452	0.592067	0.123765	0.41582	0.0857216
972	BCHE_Y505	BCHE	Y505	ANFAKYGNPNE	1	0.461172	0.114838	0.306927	0.0791785	0.36173	0.0874672	0.356662	0.024599	0.372195	0.0272823	0.560576	0.0706403	0.405533	0.0323397	0.549492	0.144881	0.462314	0.196509	0.42579	0.0994089	0.384126	0.155791	0.3305	0.131902	0.360668	0.0961695
973	BCHE_Y505_F502L	BCHE	Y505	ANLAKYGNPNE	1	0.306367	0.025538	0.38462	0.183328	0.403358	0.164272	0.564606	0.120659	0.621599	0.068849	0.77761	0.262507	0.390754	0.0803753	0.779285	0.132945	0.391814	0.127575	0.650125	0.214459	0.491931	0.134553	0.455	0.233631	0.379446	0.132445
974	BCKDHA_Y345	BCKDHA	Y345	DDSSAYRSVDE	1	0.5682	0.0273094	0.546984	0.104594	0.55279	0.146557	1.00921	0.302186	1.12048	0.175363	1.1568	0.336427	0.721104	0.357926	1.29429	0.366367	0.5688	0.0932306	0.706601	0.301999	0.671005	0.100748	0.527597	0.117056	0.484568	0.131468
975	BCKDHA_Y345_R346C	BCKDHA	Y345	DDSSAYCSVDE	1	0.535393	0.0733716	0.550462	0.177563	0.579595	0.140079	0.712124	0.172664	0.978257	0.234118	1.31866	0.29822	0.520525	0.0746807	1.0041	0.087155	0.544274	0.178829	0.691915	0.236477	0.621079	0.221203	0.504615	0.122302	0.505009	0.0459985
976	BCL2_Y9	BCL2	Y9	AGRTGYDNREI	1	0.536742	0.149928	0.427284	0.253707	0.366771	0.0732288	0.974081	0.115376	0.848414	0.130631	0.779073	0.251734	0.49967	0.117205	0.955292	0.275529	0.461368	0.154081	0.509481	0.238096	0.391892	0.0559653	0.393862	0.14028	0.429169	0.150627
977	BCL2_Y9_T7S	BCL2	Y9	AGRSGYDNREI	1	0.393984	0.0802727	0.426253	0.140744	0.441273	0.112301	0.551027	0.158343	0.51952	0.13533	0.57404	0.124966	0.320272	0.0667865	0.634912	0.145886	0.366313	0.115782	0.48951	0.210916	0.385743	0.0794272	0.409072	0.167082	0.366002	0.0482994
978	BCL6_Y157	BCL6	Y157	QDIMAYRGREV	1	0.530617	0.123633	0.63229	0.214297	0.448207	0.0468469	0.536479	0.102134	0.936958	0.0891732	1.10121	0.238793	0.615901	0.374096	1.04124	0.308839	0.56487	0.0582693	0.716684	0.233261	0.519583	0.296228	0.552995	0.276542	0.599052	0.103698
979	BCL6_Y157_G159S	BCL6	Y157	QDIMAYRSREV	1	0.513384	0.206099	0.323123	0.0764197	0.313995	0.0798315	0.744536	0.238793	0.759314	0.0978133	0.569476	0.108589	0.195532	0.118341	0.745658	0.263556	0.285093	0.0839053	0.663846	0.389786	0.45559	0.31763	0.342678	0.129125	0.39803	0.116142
980	BCLAF1_Y459	BCLAF1	Y459	REEKNYKLKET	1	1.27728	0.339025	0.842574	0.633627	0.86059	0.530152	1.16048	0.402522	1.49726	0.113233	0.996433	0.418036	1.29676	0.968205	1.20819	0.625953	0.732711	0.497572	0.714247	0.337625	0.690518	0.416925	0.798911	0.424994	1.13541	0.324414
981	BCLAF1_Y459_L461H	BCLAF1	Y459	REEKNYKHKET	1	0.741103	0.374674	0.436183	0.377074	0.530271	0.836387	0.916744	0.625056	0.570625	0.0252874	0.828926	0.532424	0.647135	0.505768	1.44471	1.00753	0.635074	0.454425	0.431151	0.332252	0.421555	0.293073	0.549968	0.251252	0.687821	0.604101
982	BCLAF1_Y459_Y459D	BCLAF1	Y459	REEKNDKLKET	0	0.356452	0.0659898	0.832952	0.552977	0.78847	0.583853	0.59621	0.237721	0.684508	0.267909	1.3236	0.754873	0.440789	0.314296	1.10552	0.525447	0.868179	0.526911	0.907748	0.520173	0.773274	0.591305	0.606497	0.404588	0.656629	0.530225
983	BCLAF1_Y466	BCLAF1	Y466	LKETGYVVERP	1	0.410578	0.123657	0.433573	0.0488257	0.398875	0.0850707	0.469137	0.147941	0.552693	0.0638805	0.76797	0.133057	0.321284	0.122402	0.806798	0.17086	0.4431	0.104947	0.608689	0.211984	0.494001	0.159894	0.278035	0.0567042	0.43811	0.0993914
984	BCLAF1_Y466_L461H	BCLAF1	Y466	HKETGYVVERP	1	0.651588	0.212998	0.497487	0.0963283	0.448463	0.113204	1.28541	0.444614	1.14135	0.295216	0.745801	0.428783	0.439369	0.16083	1.364	0.75459	0.582068	0.272347	0.655731	0.419966	0.475272	0.139866	0.50151	0.126806	0.444842	0.197815
985	BCO1_Y264	BCO1	Y264	KMATAYIRRMS	1	0.513509	0.136413	0.425152	0.0703313	0.424816	0.0791123	0.544285	0.0879121	0.579577	0.208176	0.679555	0.169259	0.361944	0.0895124	0.572403	0.205133	0.461155	0.0308887	0.431447	0.142145	0.359313	0.0761216	0.495446	0.158592	0.468375	0.128558
986	BCO1_Y264_R267S	BCO1	Y264	KMATAYIRSMS	1	0.385336	0.0595366	0.417494	0.0937749	0.38816	0.0775883	0.515978	0.143628	0.517886	0.145347	0.563781	0.112434	0.336879	0.0707254	0.599973	0.115481	0.396679	0.118111	0.368609	0.0526568	0.409102	0.0371994	0.37383	0.0945628	0.396338	0.0438354
987	BCO2_Y294	BCO2	Y294	GMTRNYIIFIE	1	0.49843	0.0820736	0.567295	0.181089	0.563459	0.225281	0.490448	0.0656774	0.884973	0.305975	0.960162	0.201635	0.446651	0.0895016	0.921496	0.205822	0.598595	0.119891	0.745252	0.123591	0.649451	0.174555	0.670023	0.322072	0.486552	0.113188
988	BCO2_Y294_G289E	BCO2	Y294	EMTRNYIIFIE	1	0.46401	0.070941	0.58572	0.110363	0.533916	0.209295	0.572022	0.11757	1.0595	0.140653	1.09793	0.152873	0.4869	0.106932	1.08474	0.324693	0.574702	0.151881	0.682768	0.129753	0.509914	0.0990277	0.569121	0.275563	0.512786	0.108992
989	BCOR_Y90	BCOR	Y90	PGNIVYSSLCG	1	5.73048	0.149925	3.12716	0.715995	5.24645	2.26476	1.82602	0.745916	1.64592	0.484186	1.37638	1.00427	1.17956	0.636672	1.62195	0.484456	0.89205	0.498878	1.01933	0.254914	0.914169	0.408142	0.986615	0.584574	1.59943	0.731572
990	BCOR_Y90_P85L	BCOR	Y90	LGNIVYSSLCG	1	5.82423	0.362788	4.98433	1.04585	6.67108	1.36649	2.48251	0.293627	2.0201	0.973128	2.10435	0.286439	1.73725	0.46379	2.14723	0.751109	1.05185	0.29315	1.5369	0.570188	1.46854	0.979303	1.38887	0.854263	2.6642	0.698259
991	BCR_Y1089	BCR	Y1089	EEVGIYRVSGV	1	4.44933	0.250022	4.31262	1.05447	3.09369	0.249276	14.0882	3.84155	0.794047	0.0521897	1.04148	0.475915	0.504395	0.111391	0.918603	0.0659956	0.457311	0.114375	0.647128	0.279758	0.488331	0.183244	0.434191	0.074833	0.575371	0.176086
992	BCR_Y1089_V1091M	BCR	Y1089	EEVGIYRMSGV	1	6.22841	0.634748	6.37809	1.95288	5.63939	1.53055	9.58313	3.37314	1.11651	0.20928	0.925198	0.172576	0.535499	0.132483	0.92133	0.168469	0.556349	0.197397	0.612187	0.102608	0.549658	0.123571	0.502477	0.116592	0.647009	0.0887656
993	BCR_Y554	BCR	Y554	KVPELYEIHKE	1	0.603193	0.0763665	0.631214	0.253278	0.853463	0.4041	0.713891	0.194115	0.766215	0.104491	1.03549	0.125961	0.975597	0.297588	1.07669	0.193387	0.593387	0.109021	0.817163	0.200592	0.930384	0.296393	0.868093	0.192215	0.618525	0.185686
994	BCR_Y554_K558T	BCR	Y554	KVPELYEIHTE	1	0.546287	0.0980273	0.629411	0.24728	0.745281	0.386782	0.71161	0.199472	0.826637	0.083871	1.18855	0.180265	0.740096	0.10445	0.98373	0.148685	0.578003	0.0803521	0.680191	0.172322	0.939977	0.193883	0.945382	0.381018	0.5083	0.100685
995	BCR_Y561	BCR	Y561	IHKEFYDGLFP	1	0.877526	0.256495	0.569809	0.136973	1.16504	0.320367	0.864141	0.163298	1.06009	0.178087	1.08468	0.236146	0.699283	0.130033	1.26604	0.343037	0.606332	0.169119	0.853309	0.25943	0.801651	0.117931	0.742744	0.134419	0.82349	0.130922
996	BCR_Y561_K558T	BCR	Y561	IHTEFYDGLFP	1	1.23771	0.18225	1.06067	0.629909	3.83367	0.635005	0.902046	0.121438	0.993253	0.0886873	1.46664	0.418032	1.64998	0.296365	1.33926	0.401732	0.682786	0.0964674	0.812793	0.149077	0.73872	0.265485	0.827609	0.341655	1.01834	0.191278
997	BCR_Y751	BCR	Y751	GKTQQYDCKWY	2	0.550306	0.123735	0.440733	0.139758	0.553758	0.186666	0.769317	0.265026	1.0519	0.169913	0.86412	0.273827	0.431703	0.116738	1.04842	0.240214	0.463856	0.0846017	0.597868	0.154817	0.553573	0.054356	0.532359	0.104372	0.514848	0.0925954
998	BCR_Y751_D752E	BCR	Y751	GKTQQYECKWY	2	0.521544	0.0749234	0.442953	0.150007	0.446796	0.112073	0.681297	0.309589	0.970093	0.172031	0.935985	0.187278	0.548619	0.0582449	1.04908	0.195566	0.498995	0.139517	0.642475	0.113417	0.506971	0.0908166	0.599897	0.231011	0.486906	0.0284579
999	BCR_Y751_D752E_YF	BCR	Y751	GKTQQYECKWF	1	0.471754	0.0300291	0.509185	0.157285	0.569285	0.207979	0.61429	0.17572	0.792697	0.029201	0.817767	0.114321	0.57179	0.126549	1.06509	0.186298	0.545484	0.0236523	0.627319	0.0694403	0.509057	0.158362	0.603041	0.20316	0.467086	0.0587807
1000	BCR_Y751_YF	BCR	Y751	GKTQQYDCKWF	1	0.429919	0.0897498	0.431622	0.114024	0.425167	0.0508337	0.748192	0.120617	0.927477	0.0920092	0.848215	0.161175	0.46296	0.107993	1.06661	0.144657	0.47198	0.0972579	0.629663	0.199884	0.596383	0.127617	0.563113	0.218619	0.450607	0.085303
1001	BCR_Y756	BCR	Y756	YDCKWYIPLTD	2	0.68953	0.154074	0.483051	0.106098	0.571464	0.151551	0.914435	0.390197	1.67824	0.603181	1.47199	0.321133	0.502081	0.0333771	1.4064	0.251283	0.839084	0.127459	0.804978	0.0907282	0.689392	0.164006	0.71074	0.337765	1.51166	0.326449
1002	BCR_Y756_D752E	BCR	Y756	YECKWYIPLTD	2	0.576367	0.103149	0.468519	0.137816	0.585254	0.239355	1.00434	0.310974	1.47757	0.17038	1.48053	0.122058	0.656958	0.0747263	1.56167	0.273924	0.812201	0.186183	1.10422	0.337855	0.843498	0.196858	0.773615	0.27693	0.922483	0.202968
1003	BCR_Y756_D752E_YF	BCR	Y756	FECKWYIPLTD	1	0.451051	0.121654	0.433511	0.116964	0.538157	0.198085	0.796178	0.165055	1.31971	0.0767297	1.23236	0.183354	0.591731	0.0773345	1.48726	0.266064	0.496847	0.0667768	1.00215	0.342802	0.753782	0.215549	0.723301	0.287973	0.433042	0.0516948
1004	BCR_Y756_YF	BCR	Y756	FDCKWYIPLTD	1	0.466214	0.108063	0.41033	0.219027	0.580773	0.300297	0.825724	0.25004	1.4443	0.275211	1.44892	0.216687	0.659598	0.102314	1.49394	0.184908	0.661262	0.166081	1.06191	0.404957	0.998445	0.569055	0.817963	0.381911	0.625158	0.244286
1005	BCR_Y910	BCR	Y910	ESPGLYGFLNV	1	1.22537	0.118347	1.47733	0.562244	2.23831	0.262132	0.717267	0.168807	0.9224	0.185848	1.08716	0.129675	1.22452	0.424938	1.10083	0.0908818	0.527245	0.0848377	0.645813	0.227933	0.585789	0.173694	0.573512	0.268714	1.04717	0.20847
1006	BCR_Y910_Y910C	BCR	Y910	ESPGLCGFLNV	0	0.452808	0.106207	0.493871	0.152512	0.487467	0.123731	0.843583	0.26824	0.979447	0.15535	1.00708	0.217494	0.475861	0.121296	1.37767	0.268053	0.556745	0.169853	0.720132	0.216788	0.59534	0.133912	0.617229	0.321616	0.519067	0.129042
1007	BCS1L_Y181	BCS1L	Y181	WRPFGYPRRRR	1	0.445574	0.0774523	0.517537	0.0955594	0.452893	0.0752375	0.444278	0.0620099	0.494349	0.149419	0.615005	0.295776	0.461677	0.143686	0.513357	0.102462	0.367394	0.0172025	0.521844	0.108941	0.485666	0.0922798	0.48077	0.141113	0.486575	0.110415
1008	BCS1L_Y181_R183C	BCS1L	Y181	WRPFGYPCRRR	1	0.517072	0.0302338	0.442498	0.11637	0.457316	0.0517698	0.543627	0.112559	0.393783	0.0645027	0.621854	0.283145	0.45781	0.143137	0.643238	0.356626	0.496151	0.111965	0.462206	0.0754091	0.422425	0.0908347	0.434678	0.103526	0.50874	0.073139
1009	BCS1L_Y181_R183H	BCS1L	Y181	WRPFGYPHRRR	1	0.473083	0.0349828	0.488441	0.0738442	0.508704	0.156244	0.500467	0.10028	0.509471	0.147672	0.622457	0.145242	0.512289	0.23721	0.510517	0.180316	0.507357	0.0560096	0.55369	0.136142	0.533624	0.0864114	0.461147	0.155082	0.50474	0.028339
1010	BCS1L_Y181_R184C	BCS1L	Y181	WRPFGYPRCRR	1	0.528445	0.0253051	0.497852	0.083907	0.454184	0.146814	0.40317	0.104711	0.484681	0.0801315	0.598939	0.268477	0.446624	0.121532	0.508912	0.183178	0.504659	0.0740143	0.458978	0.0570594	0.443837	0.109314	0.477509	0.081988	0.505282	0.0913655
1011	BEST1_Y131	BEST1	Y131	RTLIRYANLGN	1	0.685049	0.0767161	0.972588	0.370841	0.480993	0.179555	1.04335	0.335589	0.793065	0.230441	1.03488	0.326272	0.736699	0.306699	1.1433	0.323768	0.620858	0.259322	0.653695	0.181548	0.918432	0.225046	0.665906	0.404743	0.706423	0.263372
1012	BEST1_Y131_G135S	BEST1	Y131	RTLIRYANLSN	1	0.650322	0.130244	0.790091	0.206866	0.674612	0.295961	0.654144	0.278736	0.791652	0.235088	0.774161	0.355722	0.565805	0.21839	1.02305	0.617789	0.801035	0.145954	0.757301	0.288576	0.733242	0.166017	0.709613	0.193926	0.630744	0.321141
1013	BEST1_Y131_N133K	BEST1	Y131	RTLIRYAKLGN	1	1.01882	0.280354	0.848024	0.860162	0.849325	0.562595	1.06802	0.421902	1.22803	0.500459	1.39562	0.610788	0.560603	0.455243	1.27366	0.894771	0.632055	0.417737	0.611628	0.219254	0.85448	0.771922	0.775002	0.378505	1.01871	0.53301
1014	BEST1_Y148	BEST1	Y148	VSTAVYKRFPS	1	0.394917	0.0814775	0.379303	0.0433509	0.426106	0.073928	0.668489	0.195323	0.592717	0.024828	0.512436	0.165082	0.395429	0.0551121	0.732592	0.103053	0.498414	0.103203	0.463408	0.162109	0.347992	0.0697986	0.382068	0.0881632	0.525938	0.19003
1015	BEST1_Y148_A146K	BEST1	Y148	VSTKVYKRFPS	1	0.425347	0.093312	0.366345	0.0955871	0.351562	0.075414	0.50458	0.0665136	0.469872	0.0960075	0.445203	0.144584	0.421952	0.0872317	0.605088	0.117973	0.384398	0.0614261	0.305376	0.0993234	0.344013	0.0472976	0.348274	0.121258	0.365237	0.0962565
1016	BEST1_Y148_P152A	BEST1	Y148	VSTAVYKRFAS	1	0.555169	0.0605275	0.449336	0.156896	0.510986	0.11662	0.716121	0.159751	0.72487	0.114614	0.714914	0.335987	0.397707	0.170366	0.769612	0.345519	0.506872	0.160728	0.480375	0.115361	0.693126	0.389758	0.647062	0.410933	0.489417	0.0616001
1017	BEST1_Y227	BEST1	Y227	GHLYAYDWISI	2	2.3762	0.205624	2.23891	0.413032	2.99035	0.298372	0.847705	0.230428	0.923448	0.188107	1.97593	0.354687	14.9539	3.31122	3.56371	0.951478	8.88083	0.844629	6.47622	1.80062	6.51536	0.796116	5.04104	1.2112	9.38053	0.383579
1018	BEST1_Y227_D228N	BEST1	Y227	GHLYAYNWISI	2	1.31739	0.131308	1.01132	0.399927	1.23643	0.411331	1.21325	0.214573	1.33068	0.15817	1.71192	0.122093	12.0181	2.59224	1.49391	0.218022	3.66697	0.96045	2.83421	1.00692	6.38193	0.856862	5.19573	1.50064	8.13183	0.993714
1019	BEST1_Y227_D228N_YF	BEST1	Y227	GHLFAYNWISI	1	0.392329	0.0779416	0.487503	0.188808	0.444352	0.24214	0.580355	0.108206	0.97801	0.0962464	0.961541	0.0546674	4.76851	0.246718	1.05653	0.0741997	1.34005	0.4125	1.21347	0.309066	0.50965	0.155492	0.469199	0.177322	0.54826	0.0903423
1020	BEST1_Y227_G222V	BEST1	Y227	VHLYAYDWISI	2	1.43972	0.156701	1.17816	0.46168	1.83346	0.4646	0.865364	0.17673	1.33141	0.15367	2.31867	0.306287	13.048	2.50706	3.0524	0.311375	5.72565	0.788714	4.71352	1.38459	7.19568	1.42186	5.87451	1.30186	8.36267	0.327958
1021	BEST1_Y227_G222V_YF	BEST1	Y227	VHLFAYDWISI	1	0.651341	0.0733032	0.588704	0.223728	0.803682	0.250924	0.690216	0.141037	1.04304	0.106645	1.2712	0.186461	10.4366	2.3563	1.38283	0.136714	1.41351	0.524731	1.16741	0.268722	1.06124	0.293376	0.867818	0.333431	4.12031	0.319736
1022	BEST1_Y227_L224M	BEST1	Y227	GHMYAYDWISI	2	1.82345	0.0408888	1.89078	0.890486	2.87251	0.420723	0.738718	0.16207	0.79786	0.181406	2.18103	0.948634	14.727	3.88013	4.88296	1.79203	8.74536	0.338178	6.07799	1.57884	3.06367	0.371526	2.53654	0.708192	7.81808	0.845699
1023	BEST1_Y227_L224M_YF	BEST1	Y227	GHMFAYDWISI	1	1.27584	0.102415	0.93508	0.270503	1.78234	0.0949166	0.921541	0.166144	0.842399	0.237054	1.46633	0.19848	13.8229	3.39109	2.67908	0.588275	3.47872	0.77968	2.1513	1.07936	1.05283	0.159257	0.932936	0.121764	7.13719	0.644439
1024	BEST1_Y227_L224P	BEST1	Y227	GHPYAYDWISI	2	1.54551	0.247096	0.928884	0.412304	1.61718	0.594181	0.661415	0.148138	0.794384	0.0470441	1.46478	0.452756	17.4676	4.07881	2.25869	0.858617	10.1416	0.320767	6.7498	2.44845	1.64467	0.256275	1.06727	0.230277	8.66481	0.999367
1025	BEST1_Y227_L224P_YF	BEST1	Y227	GHPFAYDWISI	1	0.629026	0.124205	0.47806	0.165236	0.811411	0.291841	0.562064	0.0829423	0.773856	0.213788	1.04446	0.244197	14.7187	3.19598	1.22241	0.232415	2.02925	0.996202	1.28952	0.668288	0.93169	0.190056	0.720516	0.208701	6.57285	0.301191
1026	BEST1_Y227_S231R	BEST1	Y227	GHLYAYDWIRI	2	2.28361	0.0756581	1.84537	0.446153	3.12407	0.279775	0.856691	0.165471	0.940924	0.0370831	1.44155	0.227192	15.8235	3.93638	3.02659	0.882551	4.35316	0.975868	2.73515	1.49491	3.43462	0.437123	2.41828	0.668844	9.26793	1.17415
1027	BEST1_Y227_S231R_YF	BEST1	Y227	GHLFAYDWIRI	1	0.941106	0.107083	0.673317	0.345033	1.6045	0.295646	0.673734	0.232795	0.866764	0.221241	1.00534	0.0301703	12.5092	3.11956	1.50888	0.242814	1.67833	0.895258	1.21459	0.470413	0.787322	0.202433	0.64107	0.135216	4.77872	0.586269
1028	BEST1_Y227_Y227C	BEST1	Y227	GHLYACDWISI	1	1.33607	0.156197	1.05608	0.454246	0.845691	0.330258	1.05294	0.296449	1.17497	0.224545	1.21118	0.220732	0.676848	0.153363	1.4338	0.249283	0.901535	0.243613	1.05915	0.179833	1.3013	0.168207	0.928633	0.259088	4.89257	0.342372
1029	BEST1_Y227_Y227C_YF	BEST1	Y227	GHLFACDWISI	0	0.386188	0.0877538	0.449846	0.191746	0.46875	0.228612	0.53052	0.086103	0.710761	0.141587	0.936878	0.235176	0.487202	0.0913808	1.00747	0.251713	0.613148	0.225948	0.638846	0.133142	0.408168	0.197063	0.521607	0.258374	0.396365	0.134292
1030	BEST1_Y227_Y227N	BEST1	Y227	GHLYANDWISI	1	0.683175	0.138292	0.734268	0.240058	0.574565	0.208612	0.58742	0.0531801	0.877575	0.0588037	0.819242	0.125103	0.526888	0.197481	0.871429	0.128256	0.60887	0.0984597	0.673893	0.0985187	0.777609	0.350923	0.619425	0.148772	3.31934	0.21315
1031	BEST1_Y227_Y227N_YF	BEST1	Y227	GHLFANDWISI	0	0.469131	0.0515233	0.399196	0.0893316	0.501594	0.06006	0.627326	0.201151	0.782434	0.149962	0.703359	0.0730436	0.426711	0.111371	0.789019	0.158772	0.430311	0.0657449	0.483697	0.0559119	0.424066	0.0390322	0.624759	0.356956	0.421006	0.0776433
1032	BEST1_Y227_YF	BEST1	Y227	GHLFAYDWISI	1	0.914622	0.171046	0.894139	0.380159	1.40095	0.624235	0.52551	0.0355693	0.707021	0.134278	1.24866	0.319982	15.0928	3.06891	1.47569	0.284867	2.76148	1.04086	1.74288	1.00015	0.938183	0.249595	0.822924	0.190875	6.91656	0.823848
1033	BEX1_Y43	BEX1	Y43	LDAGEYCVPRG	1	0.816095	0.0306123	1.26138	1.06049	1.57066	1.06506	3.62357	1.73837	1.04912	0.424016	8.7817	7.95387	1.4676	0.823866	2.01224	0.776785	1.31948	0.497407	1.73355	0.435735	3.38279	2.20815	3.86796	2.46077	0.865937	0.235125
1034	BEX1_Y43_A40V	BEX1	Y43	LDVGEYCVPRG	1	0.538957	0.207304	1.0907	0.588877	0.852929	0.378194	3.72607	1.72742	1.3236	0.473773	5.35607	4.07951	0.842323	0.46221	1.20544	0.468235	0.982454	0.316482	1.23283	0.731298	2.25887	0.9743	2.46971	0.89176	0.568261	0.135906
1035	BICD2_Y538	BICD2	Y538	ELANLYHHVCM	1	1.47397	0.386097	0.868982	0.333727	2.16856	0.177215	0.982307	0.335423	1.23129	0.271062	1.16915	0.226316	1.77381	0.358982	1.04773	0.245472	1.5699	0.613088	1.49183	0.623823	0.666344	0.270339	0.707772	0.390353	1.24143	0.149764
1036	BICD2_Y538_C542W	BICD2	Y538	ELANLYHHVWM	1	2.51182	0.182006	2.74532	0.760513	5.10875	0.547255	0.917547	0.255341	1.30323	0.215333	1.31616	0.447555	12.8596	3.65137	1.24826	0.472814	6.38422	1.17719	4.76133	2.62361	6.35091	0.814971	1.92755	0.619746	6.21081	1.08491
1037	BIN1_Y150	BIN1	Y150	RKLVDYDSARH	1	0.648744	0.269278	0.449051	0.276781	0.4183	0.177464	0.915817	0.279237	0.791504	0.521202	0.491457	0.162238	0.564891	0.151568	0.967968	0.411856	0.570555	0.403325	0.668023	0.12866	0.498257	0.117536	0.481188	0.0981151	0.569683	0.140353
1038	BIN1_Y150_D151N	BIN1	Y150	RKLVDYNSARH	1	0.377628	0.0642764	0.389376	0.246257	0.383293	0.102173	0.547935	0.128962	0.425372	0.19887	0.559232	0.328515	0.418686	0.2607	0.56826	0.254353	0.375689	0.154652	0.325644	0.138772	0.310992	0.1558	0.337998	0.133846	0.392812	0.0901653
1039	BIN1_Y150_R145C	BIN1	Y150	CKLVDYDSARH	1	0.371605	0.0472964	0.463206	0.288313	0.413977	0.109435	0.61038	0.0676804	0.659683	0.0770841	0.777492	0.151095	0.401201	0.0712243	0.908953	0.116196	0.394832	0.0488555	0.62403	0.163915	0.50462	0.156347	0.44682	0.122648	0.380857	0.0708272
1040	BIN1_Y150_R154Q	BIN1	Y150	RKLVDYDSAQH	1	0.541283	0.128855	0.400002	0.15738	0.66846	0.194188	0.870555	0.441725	0.559546	0.335694	0.547634	0.214959	0.736725	0.242913	0.9876	0.638248	0.42517	0.199278	1.27908	1.315	0.647795	0.47875	0.795811	0.354384	0.56545	0.162148
1041	BIN1_Y157	BIN1	Y157	SARHHYESLQT	1	0.44671	0.0344917	0.360181	0.0824167	0.446139	0.0601323	0.636438	0.0822938	0.479313	0.147514	0.53211	0.0421559	0.499004	0.0856116	0.564454	0.0718097	0.444985	0.264649	0.395704	0.123209	0.431024	0.103026	0.373657	0.110104	0.454662	0.0333729
1042	BIN1_Y157_R154Q	BIN1	Y157	SAQHHYESLQT	1	0.433207	0.0406704	0.418388	0.0471008	0.513312	0.14902	0.600677	0.0901059	0.484319	0.07695	0.763248	0.347027	0.702656	0.151007	0.62184	0.0996562	0.469533	0.0995867	0.441792	0.0524464	0.462828	0.168145	0.402396	0.122865	0.504437	0.096647
1043	BIRC3_Y245	BIRC3	Y245	QDTSRYTVSNL	1	0.617444	0.287837	0.52297	0.14456	0.467418	0.154023	0.804406	0.288171	0.644008	0.259508	0.97054	0.5703	0.500544	0.184825	0.823596	0.23966	0.515956	0.284661	0.710433	0.329424	0.674571	0.381854	0.466733	0.219571	0.567105	0.0458384
1044	BIRC3_Y245_S248C	BIRC3	Y245	QDTSRYTVCNL	1	0.439481	0.166819	0.546152	0.144626	0.358657	0.0892561	0.853973	0.421802	0.740749	0.3057	0.745334	0.361248	0.557359	0.197687	0.815434	0.215735	0.418377	0.183512	0.468603	0.167562	0.527958	0.205523	0.438771	0.285078	0.348263	0.182015
1045	BLM_Y296	BLM	Y296	FDDDDYDTDFV	1	0.493685	0.0905149	0.562932	0.173035	0.538441	0.148831	0.766605	0.169255	0.958389	0.19171	1.26178	0.0927491	0.530947	0.139103	1.14285	0.208496	0.585842	0.0951849	0.779559	0.179662	0.662106	0.200559	0.548619	0.208128	0.50932	0.0732393
1046	BLM_Y296_T298M	BLM	Y296	FDDDDYDMDFV	1	0.569862	0.22124	0.612685	0.221415	0.559585	0.179188	0.680192	0.224878	0.945146	0.161753	1.29244	0.454027	0.56085	0.146496	1.22458	0.14743	0.549883	0.0954653	0.814745	0.128068	0.760721	0.182317	0.611943	0.210929	0.437614	0.0277912
1047	BMP15_Y235	BMP15	Y235	AFLLLYFNDTH	1	0.486449	0.129708	0.44545	0.168172	0.482475	0.169977	1.16399	0.645883	1.25847	0.0998174	1.14507	0.228878	0.525128	0.050994	1.40947	0.168297	0.490389	0.196087	0.914807	0.551751	0.760535	0.318132	0.495863	0.158578	0.429802	0.0323328
1048	BMP15_Y235_Y235C	BMP15	Y235	AFLLLCFNDTH	0	0.412739	0.077724	0.562571	0.238713	0.561451	0.248696	1.00922	0.389129	1.62615	0.335004	1.41647	0.19482	0.663191	0.152687	1.43588	0.273423	0.50066	0.101582	0.918377	0.329378	0.724077	0.0987907	0.696494	0.179376	0.483691	0.0912814
1049	BMPR1A_Y453	BMPR1A	Y453	GIVEEYQLPYY	3	3.4678	0.416935	0.647071	0.250898	0.63006	0.0670352	1.16313	0.224342	1.28782	0.0497989	2.99581	1.40359	0.65958	0.129634	1.0563	0.141926	1.05602	0.251118	0.945958	0.135857	0.611229	0.215105	0.642457	0.218065	0.566925	0.220818
1050	BMPR1A_Y453_V450M	BMPR1A	Y453	GIMEEYQLPYY	3	3.76425	0.394898	1.39814	0.564378	0.998049	0.216498	1.2514	0.302647	1.28218	0.171244	5.83427	2.63724	0.942141	0.183271	1.39845	0.202605	2.23074	1.01371	1.57109	0.539231	0.748494	0.134502	0.795491	0.206236	0.397853	0.0482925
1051	BMPR1A_Y453_V450M_YF	BMPR1A	Y453	GIMEEYQLPFF	1	0.894054	0.166817	1.20253	0.520209	0.676442	0.334436	2.27146	1.76367	1.09138	0.12224	4.83465	2.47192	0.587335	0.0780434	1.10905	0.189605	1.69495	0.906131	1.31813	0.431744	0.648374	0.282134	0.914475	0.197999	0.499077	0.106589
1052	BMPR1A_Y453_YF	BMPR1A	Y453	GIVEEYQLPFF	1	0.746352	0.126679	0.590689	0.127043	0.603587	0.0963332	2.24321	1.40279	1.34369	0.0617302	3.30941	1.17258	0.587014	0.0944592	1.34779	0.27463	0.811829	0.165262	0.82195	0.21848	0.598677	0.162324	0.723994	0.144073	0.587944	0.0793469
1053	BMPR1A_Y457	BMPR1A	Y457	EYQLPYYNMVP	3	5.13106	0.717437	3.82815	0.399234	3.23433	0.241787	2.99585	2.2424	9.57595	2.00518	6.14755	4.06504	5.55791	0.324863	1.11697	0.246746	14.1189	2.54713	11.9501	1.2957	2.81359	0.494621	3.63754	1.35774	7.06233	0.318184
1054	BMPR1A_Y457_M460T	BMPR1A	Y457	EYQLPYYNTVP	3	5.65709	0.800237	1.42169	0.359498	1.93216	0.342483	2.53859	1.68233	5.82295	1.69466	4.46148	2.10491	1.93682	0.649149	1.04645	0.216619	7.09301	0.975329	5.15206	1.86577	0.966295	0.220248	1.19332	0.253531	2.30644	0.199306
1055	BMPR1A_Y457_M460T_YF	BMPR1A	Y457	EFQLPYFNTVP	1	1.2583	0.19891	0.453775	0.104472	0.523084	0.0434463	0.615464	0.102696	1.07929	0.0971173	0.878717	0.183767	0.423089	0.0837025	0.935005	0.0977861	0.681909	0.103562	0.540988	0.0804384	0.523407	0.0432163	0.548623	0.221252	0.453891	0.0363043
1056	BMPR1A_Y457_YF	BMPR1A	Y457	EFQLPYFNMVP	1	2.11874	0.406096	0.546838	0.235826	0.596281	0.182543	0.618244	0.107967	7.20878	1.28352	1.01132	0.0591991	0.348483	0.128103	1.01396	0.228204	4.99783	1.17742	3.58219	1.99053	0.38866	0.0587687	0.460138	0.354333	0.583515	0.0650834
1057	BMPR1A_Y458	BMPR1A	Y458	YQLPYYNMVPS	3	5.10418	0.449365	3.35793	0.636116	3.27764	0.607371	3.96066	3.32264	10.3619	1.64729	2.75263	1.70045	5.6694	0.921656	0.801549	0.161278	13.0674	2.8861	10.4575	2.87141	2.58431	0.659088	2.52237	0.714032	8.8425	0.787085
1058	BMPR1A_Y458_M460T	BMPR1A	Y458	YQLPYYNTVPS	3	3.46343	0.39445	0.92006	0.200061	1.45526	0.234767	2.34236	2.28688	4.98027	1.53801	1.9963	1.37753	2.09708	0.794734	0.684171	0.250309	5.46447	0.939704	3.69082	1.62846	0.641968	0.127671	0.799453	0.425795	5.80776	0.62374
1059	BMPR1A_Y458_M460T_YF	BMPR1A	Y458	FQLPFYNTVPS	1	0.564569	0.0982309	0.46535	0.103184	0.686602	0.221901	0.624859	0.253828	0.704179	0.0922484	0.748043	0.098002	0.64156	0.123242	0.828445	0.104684	0.414316	0.0996167	0.699103	0.319349	0.525722	0.137904	0.450365	0.10324	0.56853	0.0442168
1060	BMPR1A_Y458_YF	BMPR1A	Y458	FQLPFYNMVPS	1	1.05984	0.233493	1.05335	0.217631	1.07007	0.215137	0.581998	0.115242	0.665662	0.130129	0.787608	0.0880906	1.44856	0.411432	0.810913	0.290699	1.20562	0.260518	0.93595	0.177719	0.650007	0.177511	0.773229	0.216517	2.69261	0.852802
1061	BMPR1A_Y467	BMPR1A	Y467	PSDPSYEDMRE	1	0.533799	0.12345	0.84783	0.425159	1.28528	0.92682	0.831456	0.214718	1.44501	0.318122	2.49296	1.49994	1.2584	0.795293	1.5943	0.550549	0.758026	0.434654	1.27364	0.520308	0.900647	0.623049	0.494736	0.362291	0.504344	0.178101
1062	BMPR1A_Y467_M470T	BMPR1A	Y467	PSDPSYEDTRE	1	1.14329	0.299999	0.887495	0.410056	1.19083	0.425506	1.7101	0.668036	2.3707	0.247603	1.6638	1.05546	0.894298	0.339985	2.72729	1.30557	0.813318	0.729303	1.17987	0.827792	0.764689	0.463572	0.882773	0.426949	0.827221	0.316488
1063	BMPR2_Y247	BMPR2	Y247	NEKNIYRVPLM	1	0.877414	0.122155	1.96268	0.402306	1.1588	0.351981	31.2048	6.32676	0.670895	0.14085	0.621602	0.103344	0.438647	0.0995679	0.708023	0.1484	0.446202	0.0370053	0.501057	0.103565	0.376554	0.0649876	0.357175	0.0596967	0.608814	0.133807
1064	BMPR2_Y247_R248G	BMPR2	Y247	NEKNIYGVPLM	1	3.45009	0.269	4.93254	1.04494	6.03528	2.06809	19.6152	5.93351	0.627426	0.0853098	0.616118	0.104182	3.25584	1.18705	0.716669	0.167125	0.510968	0.213805	0.623934	0.258419	0.430833	0.137343	1.70361	0.32106	2.82982	0.445049
1065	BMPR2_Y979	BMPR2	Y979	RVKTPYSLKRW	1	0.615716	0.0917472	0.582324	0.217167	0.745377	0.263189	0.944342	0.332076	1.24304	0.518045	1.19231	0.634761	0.755903	0.284311	1.17286	0.496801	0.665746	0.141818	0.930696	0.326553	0.608389	0.217088	0.516398	0.385936	0.572083	0.158138
1066	BMPR2_Y979_R974P	BMPR2	Y979	PVKTPYSLKRW	1	0.986585	0.340845	0.629713	0.222839	0.426834	0.219406	1.143	0.600796	1.36499	1.03688	1.03897	0.545884	0.609433	0.382862	1.49087	0.517004	0.652857	0.243218	0.789225	0.304593	0.499369	0.179478	0.840297	0.450113	0.586473	0.179932
1067	BMS1_Y651	BMS1	Y651	KEEEDYKEENN	1	0.453055	0.0269127	0.475227	0.131084	0.516475	0.172878	0.750166	0.226324	1.00005	0.280672	1.14667	0.37204	0.550384	0.100468	1.05948	0.251039	0.46758	0.179355	0.560755	0.132314	0.532048	0.0724392	0.554358	0.208853	0.421898	0.0925064
1068	BMS1_Y651_K652R	BMS1	Y651	KEEEDYREENN	1	0.536142	0.155508	0.499629	0.119973	0.64985	0.11905	0.877052	0.263831	1.15229	0.322003	1.30093	0.238081	0.584611	0.143831	1.24415	0.172768	0.581558	0.12864	0.78968	0.22797	0.630367	0.262008	0.528056	0.203335	0.601133	0.18166
1069	BMX_Y216	BMX	Y216	TSLAQYDSNSK	1	0.478833	0.015872	0.34426	0.0866767	0.42785	0.146791	0.542534	0.159963	0.578567	0.0927702	0.622047	0.0740569	0.370417	0.0682793	0.735631	0.134692	0.524817	0.142467	0.443161	0.12363	0.352061	0.0863598	0.567928	0.14561	0.444313	0.133489
1070	BMX_Y216_S212R	BMX	Y216	TRLAQYDSNSK	1	0.6435	0.0712521	0.439889	0.0831394	0.420269	0.233747	0.776366	0.178806	0.811077	0.173574	0.71293	0.357673	0.44524	0.21934	0.684274	0.198623	0.526688	0.231012	0.409927	0.155613	0.399086	0.175335	0.402003	0.18767	0.682193	0.304104
1071	BOD1_Y82	BOD1	Y82	DTKPAYQNLRQ	1	0.380427	0.0268541	0.383187	0.055876	0.349204	0.0464206	0.719277	0.545396	0.523779	0.114122	0.46199	0.0858853	0.38511	0.0427395	0.540826	0.0838241	0.433658	0.114095	0.452178	0.0873846	0.380344	0.0829811	0.35002	0.0848636	0.312619	0.0447802
1072	BOD1_Y82_A81V	BOD1	Y82	DTKPVYQNLRQ	1	1.07376	0.347431	1.07443	0.394639	1.29376	0.496925	0.70839	0.0833253	0.621092	0.0739413	0.595751	0.194056	0.506731	0.179618	0.752307	0.212185	0.510884	0.114829	0.456086	0.180849	0.549347	0.168175	0.439623	0.113951	0.532708	0.0507214
1073	BPGM_Y92	BPGM	Y92	LNERHYGALIG	1	0.639233	0.0986487	0.514366	0.0980479	0.561137	0.162349	0.460537	0.125005	0.571462	0.0330087	0.534366	0.0901856	0.45894	0.117557	0.609092	0.130439	0.420204	0.0255143	0.469592	0.0935476	0.319207	0.118554	0.469187	0.113308	0.53625	0.0266821
1074	BPGM_Y92_R90C	BPGM	Y92	LNECHYGALIG	1	3.61237	0.214643	4.06978	2.71939	2.92978	2.0123	1.39849	0.300566	0.884924	0.243127	0.995856	0.253756	1.35378	0.647608	1.38131	0.424186	0.701337	0.29189	0.886248	0.457833	0.682131	0.335497	0.878153	0.679679	0.741123	0.282689
1075	BPIFB2_Y36	BPIFB2	Y36	KAALSYVSEIG	1	0.372181	0.104145	0.364449	0.0329328	0.475596	0.254796	0.452546	0.0653649	0.668425	0.1568	0.55514	0.0785264	0.38707	0.0717683	0.635555	0.0912732	0.455851	0.070672	0.558108	0.158842	0.35173	0.0766207	0.384795	0.119012	0.325772	0.0502215
1076	BPIFB2_Y36_K31M	BPIFB2	Y36	MAALSYVSEIG	1	0.430732	0.0554604	0.432261	0.0519341	0.399595	0.148168	0.614874	0.145437	0.803517	0.207792	0.642047	0.0804464	0.394321	0.0492123	0.732636	0.128291	0.447121	0.0334634	0.583688	0.167174	0.39686	0.033706	0.520696	0.0893072	0.370958	0.0393773
1077	BRCA2_Y2621	BRCA2	Y2621	SRIWVYNHYRW	2	0.401725	0.116299	0.46897	0.180478	0.441954	0.207567	0.782843	0.21361	0.950076	0.0645102	1.05287	0.228125	0.396359	0.130631	1.5904	0.551586	0.57362	0.0555637	0.845179	0.310302	0.67099	0.275313	0.465588	0.305826	0.466394	0.173593
1078	BRCA2_Y2621_W2626C	BRCA2	Y2621	SRIWVYNHYRC	2	0.391963	0.0655754	0.395562	0.169437	0.458656	0.154062	0.64967	0.132244	0.934348	0.153629	0.92711	0.100117	0.482401	0.0364347	1.11529	0.104102	0.50956	0.0705632	0.725847	0.225768	0.55545	0.202473	0.587104	0.178156	0.376892	0.0919452
1079	BRCA2_Y2621_W2626C_YF	BRCA2	Y2621	SRIWVYNHFRC	1	0.482572	0.0728459	0.547494	0.0663174	0.542751	0.155513	0.976468	0.121202	1.19318	0.393411	1.16241	0.119229	0.652659	0.14197	1.42774	0.117791	0.574688	0.155363	0.936812	0.296965	0.637755	0.0981259	0.67182	0.148287	0.465823	0.0817349
1080	BRCA2_Y2621_YF	BRCA2	Y2621	SRIWVYNHFRW	1	0.479319	0.0706174	0.423458	0.0812914	0.47663	0.169719	0.853489	0.266809	1.12561	0.0386334	1.14689	0.229703	0.412568	0.0885671	1.29039	0.141988	0.435098	0.141323	0.77958	0.23948	0.597088	0.136432	0.612027	0.159811	0.439546	0.0520433
1081	BRCA2_Y2624	BRCA2	Y2624	WVYNHYRWIIW	2	0.414961	0.0566335	0.375217	0.154157	0.461187	0.244064	0.840852	0.15955	1.13618	0.144682	0.937146	0.171011	0.430823	0.167907	1.10996	0.201792	0.499317	0.134384	0.701543	0.296409	0.520503	0.156198	0.596903	0.121968	0.300873	0.0696539
1082	BRCA2_Y2624_I2627F	BRCA2	Y2624	WVYNHYRWFIW	2	0.433471	0.0896945	0.441177	0.166351	0.40346	0.0738631	0.777487	0.286888	1.15345	0.176297	1.11995	0.145823	0.49017	0.122695	1.23732	0.190336	0.406262	0.0434579	0.667191	0.286186	0.506245	0.0850749	0.465908	0.186587	0.418439	0.036043
1083	BRCA2_Y2624_I2627F_YF	BRCA2	Y2624	WVFNHYRWFIW	1	0.408769	0.129037	0.46195	0.197331	0.482108	0.207986	0.89835	0.295411	1.25353	0.0485611	1.13127	0.153936	0.575442	0.0728831	1.31712	0.108052	0.48956	0.0410859	0.812646	0.341411	0.654361	0.255309	0.635811	0.261189	0.46345	0.0808691
1084	BRCA2_Y2624_W2626C	BRCA2	Y2624	WVYNHYRCIIW	2	0.481204	0.0224984	0.515189	0.206798	0.537513	0.184811	1.18064	0.448295	1.39893	0.316419	1.28378	0.295943	0.569194	0.104796	1.62901	0.280189	0.561702	0.121814	0.890908	0.388564	0.805697	0.146333	0.644591	0.17489	0.658605	0.502209
1085	BRCA2_Y2624_W2626C_YF	BRCA2	Y2624	WVFNHYRCIIW	1	0.496984	0.126477	0.481555	0.180504	0.574215	0.128928	1.03615	0.311919	1.40962	0.17113	1.27977	0.176412	0.588795	0.141867	1.66491	0.458652	0.498372	0.119799	0.956484	0.38913	0.885274	0.242033	0.644413	0.0973264	0.53759	0.220475
1086	BRCA2_Y2624_YF	BRCA2	Y2624	WVFNHYRWIIW	1	0.432103	0.0994371	0.343449	0.127979	0.403221	0.181062	0.861922	0.194777	1.35677	0.102719	1.28766	0.217684	0.456294	0.0954007	1.38955	0.385723	0.451581	0.11303	0.823707	0.402224	0.611378	0.20047	0.536142	0.233829	0.437394	0.0836512
1087	BRCA2_Y3009	BRCA2	Y3009	KRYRIYHLATS	2	0.50784	0.112109	0.44517	0.0817823	0.431988	0.149727	0.401577	0.131008	0.336405	0.111046	0.564069	0.124187	0.312838	0.0863203	0.491324	0.126356	0.487167	0.0944188	0.508656	0.116263	0.456089	0.247426	0.460579	0.0498177	0.32236	0.0463978
1088	BRCA2_Y3009_T3013I	BRCA2	Y3009	KRYRIYHLAIS	2	0.458588	0.0494506	0.342951	0.0650062	0.446361	0.0636013	0.449193	0.155258	0.603963	0.148555	0.535187	0.142283	0.405702	0.0318713	0.67973	0.0399876	0.599074	0.59266	0.464495	0.136508	0.369885	0.0277773	0.358228	0.0515293	0.619647	0.361678
1089	BRCA2_Y3009_T3013I_YF	BRCA2	Y3009	KRFRIYHLAIS	1	0.447938	0.0625851	0.550162	0.16848	0.493928	0.111422	1.3798	1.54682	0.860182	0.126627	0.899224	0.159584	0.479991	0.0557841	0.941987	0.201073	0.644361	0.172187	0.625213	0.148592	0.612107	0.178714	0.523633	0.258421	0.483544	0.12078
1090	BRCA2_Y3009_YF	BRCA2	Y3009	KRFRIYHLATS	1	0.481855	0.185393	0.433856	0.102398	0.453923	0.10435	0.391452	0.103743	0.439082	0.0373971	0.567491	0.0651422	0.421983	0.0327926	1.57037	2.6137	0.358487	0.0678365	0.48054	0.0860171	0.353288	0.130337	0.434831	0.166176	0.380163	0.0992059
1091	BRCA2_Y57	BRCA2	Y57	HKNNNYEPNLF	1	0.579053	0.123675	0.576658	0.065443	0.609853	0.0979961	0.56342	0.269727	0.476863	0.371736	0.738539	0.141324	0.620105	0.240847	0.766542	0.191173	1.19477	1.66217	0.508261	0.0847062	1.94636	2.23846	0.890427	0.431445	0.538941	0.029132
1092	BRCA2_Y57_K53R	BRCA2	Y57	HRNNNYEPNLF	1	0.419048	0.11863	0.583136	0.138254	0.465227	0.327852	0.509233	0.313698	1.05945	0.255193	0.683966	0.190854	0.551789	0.137876	0.75031	0.318469	0.539886	0.340542	0.66164	0.444461	1.07467	0.378666	0.858089	0.444013	0.616634	0.0684454
1093	BRCA2_Y57_N60S	BRCA2	Y57	HKNNNYEPSLF	1	0.657877	0.192244	0.651762	0.221907	0.562544	0.205272	0.658917	0.269581	0.897242	0.207849	1.12808	0.109553	0.791063	0.115824	1.00186	0.190058	0.79329	0.55387	0.891313	0.396108	0.689417	0.359732	0.765654	0.130274	0.653849	0.191054
1094	BRCA2_Y71	BRCA2	Y71	QRKPSYNQLAS	1	0.414841	0.124042	0.398678	0.167901	0.344604	0.221247	0.470851	0.149154	0.598274	0.59095	0.448669	0.292705	0.24364	0.113357	0.529655	0.147405	0.543143	0.250467	0.641956	0.288415	0.344028	0.209179	0.529729	0.298138	0.392203	0.186103
1095	BRCA2_Y71_A75P	BRCA2	Y71	QRKPSYNQLPS	1	0.681905	0.232032	0.599175	0.183688	0.691369	0.304383	1.07861	0.162981	0.719702	0.126286	0.885802	0.131331	0.536215	0.213678	0.766867	0.280381	0.556937	0.123744	0.597698	0.14602	0.448513	0.186986	0.522093	0.214595	0.566606	0.224466
1096	BRD1_Y33	BRD1	Y33	RETLTYAQAQR	1	0.622749	0.129622	0.584402	0.17533	0.746319	0.0771769	0.962717	0.475045	0.69415	0.19919	0.702188	0.209863	0.420182	0.170522	0.73669	0.140379	0.540813	0.113389	0.525271	0.291992	0.38251	0.228713	0.4778	0.241936	0.529382	0.0795983
1097	BRD1_Y33_R38G	BRD1	Y33	RETLTYAQAQG	1	0.768042	1.02072	0.551156	0.649116	0.98168	1.14835	0.418369	0.836739	0	0	0.579322	0.536485	0.383284	0.469953	0.448169	0.41495	0.915689	0.872287	0.149249	0.223594	0	0	0.934497	1.14041	0.391026	0.511713
1098	BRD2_Y715	BRD2	Y715	KPRKPYTIKKP	1	0.750347	0.124412	0.607913	0.264953	0.923628	0.69919	1.97904	0.764171	2.94631	0.918958	1.28101	0.961913	1.18518	0.660523	1.94396	0.93326	0.86361	0.28438	2.19627	0.945806	1.03278	0.327541	0.764792	0.245691	0.643839	0.274844
1099	BRD2_Y715_P714L	BRD2	Y715	KPRKLYTIKKP	1	0.442144	0.0752621	0.374824	0.0775981	0.451936	0.0952028	0.456087	0.0836007	0.531532	0.150644	0.608041	0.196091	0.412907	0.0592127	0.495925	0.1846	0.328355	0.108051	0.427229	0.0509593	0.373694	0.0951681	0.444465	0.0910104	0.407597	0.0666226
1100	BRD4_Y599	BRD4	Y599	KPPPTYESEEE	1	0.766551	0.0947956	0.664196	0.144603	0.640946	0.0969875	1.18273	0.506832	1.38549	0.324789	1.64643	0.37492	0.753403	0.0898672	1.87834	0.373759	0.617507	0.0610956	0.774707	0.16304	0.653227	0.0669748	0.710781	0.307495	0.552111	0.0417255
1101	BRD4_Y599_T598S	BRD4	Y599	KPPPSYESEEE	1	0.591452	0.0395484	0.638605	0.226552	0.6007	0.114246	0.957192	0.146695	1.31556	0.306356	1.42298	0.398328	0.557434	0.0385277	1.29336	0.127649	0.584259	0.150367	0.709646	0.152072	0.61105	0.132989	0.760906	0.311035	0.542651	0.0846466
1102	BRDT_Y291	BRDT	Y291	KKHFSYAWPFY	2	0.375112	0.0579959	0.455838	0.201095	0.425091	0.156657	0.493236	0.191202	0.646883	0.0749629	1.00034	0.160616	0.38548	0.058897	0.964901	0.170601	0.494937	0.175847	0.564404	0.178678	0.621649	0.255604	0.428434	0.18052	1.22233	0.184194
1103	BRDT_Y291_H288Y	BRDT	Y291	KKYFSYAWPFY	3	0.434948	0.0738799	0.383185	0.0920512	0.414903	0.108168	0.711511	0.17056	1.24337	0.250495	0.936958	0.287504	0.395183	0.0921346	1.02908	0.25869	0.475216	0.107748	0.620884	0.132921	0.497349	0.0715165	0.451523	0.0278455	1.96357	0.354499
1104	BRDT_Y291_H288Y_YF	BRDT	Y291	KKFFSYAWPFF	1	0.497391	0.0565565	0.555345	0.0738476	0.496761	0.119745	0.61062	0.104284	0.920039	0.413342	1.06842	0.466998	0.488466	0.0819382	0.991462	0.131957	0.514552	0.109097	0.716126	0.204569	0.504776	0.101698	0.545131	0.0711306	1.57627	0.493878
1105	BRDT_Y291_YF	BRDT	Y291	KKHFSYAWPFF	1	0.529303	0.0733968	0.428031	0.0961729	0.427871	0.0707371	0.660638	0.136078	0.976466	0.419649	1.03438	0.34557	0.487154	0.0840503	1.13195	0.303229	0.544747	0.081868	0.653175	0.11305	0.466826	0.0972829	0.493819	0.119485	1.64071	0.201749
1106	BRDT_Y331	BRDT	Y331	MDNQEYKDAYK	2	0.367887	0.0779822	0.417456	0.19169	0.474391	0.176867	0.677424	0.281867	0.900513	0.0941317	0.932477	0.102677	0.455666	0.0652287	1.12307	0.262426	0.484576	0.119123	0.65154	0.240058	0.545661	0.158491	0.401823	0.0789041	0.445055	0.0968885
1107	BRDT_Y331_K336T	BRDT	Y331	MDNQEYKDAYT	2	0.546397	0.0650202	0.589392	0.165773	0.672771	0.213843	0.791602	0.226652	1.11443	0.307409	1.33256	0.306723	0.63831	0.173589	1.33091	0.200925	0.666577	0.167628	0.782964	0.0843646	0.59842	0.154241	0.795882	0.435499	0.585624	0.115224
1108	BRDT_Y331_K336T_YF	BRDT	Y331	MDNQEYKDAFT	1	0.458284	0.102898	0.48648	0.158109	0.487695	0.17331	0.736916	0.111846	1.15421	0.140884	1.13638	0.238907	0.539044	0.178472	1.29587	0.300041	0.539112	0.148425	0.801648	0.107266	0.560236	0.176216	0.913383	0.470206	0.401847	0.119245
1109	BRDT_Y331_YF	BRDT	Y331	MDNQEYKDAFK	1	0.526217	0.130327	0.492763	0.175188	0.584398	0.152145	1.2161	0.885156	1.21477	0.116607	1.15372	0.249383	0.504837	0.138928	1.38612	0.0893575	0.504433	0.0924141	0.669516	0.133815	0.714789	0.151483	0.601942	0.19352	0.441821	0.0931937
1110	BRDT_Y335	BRDT	Y335	EYKDAYKFAAD	2	0.494679	0.111764	0.499482	0.114857	0.541667	0.249125	0.665865	0.255207	0.721707	0.0348725	0.984287	0.287068	0.559066	0.165031	1.13598	0.338361	0.510634	0.100418	0.632397	0.0772748	0.589509	0.397641	0.552974	0.162633	0.475005	0.0529167
1111	BRDT_Y335_K336T	BRDT	Y335	EYKDAYTFAAD	2	1.28648	0.128965	0.833333	0.370822	0.548452	0.141795	0.555967	0.108091	1.10646	0.202171	1.15307	0.174122	0.555439	0.168699	1.08932	0.219921	0.510721	0.127026	0.739895	0.109908	0.553056	0.209846	0.595303	0.289452	0.509625	0.106711
1112	BRDT_Y335_K336T_YF	BRDT	Y335	EFKDAYTFAAD	1	1.36003	0.0777617	0.630304	0.152819	0.57033	0.201914	0.64674	0.125833	0.835099	0.242936	1.09539	0.222764	0.476923	0.0335439	0.959013	0.128863	0.507938	0.0729914	0.605818	0.117681	0.452041	0.161561	0.518804	0.27733	0.456075	0.146927
1113	BRDT_Y335_YF	BRDT	Y335	EFKDAYKFAAD	1	0.446878	0.0440703	0.413538	0.0900101	0.4291	0.128922	0.459296	0.0573051	0.637901	0.129307	0.646623	0.0602669	0.40823	0.0698587	0.731407	0.154085	0.414281	0.0636357	0.524033	0.0865493	0.367128	0.0508861	0.491219	0.235972	0.492034	0.233229
1114	BRIP1_Y916	BRIP1	Y916	VTSLKYSTSPY	2	0.54166	0.0850639	0.522937	0.119857	0.515661	0.0982792	0.537303	0.103618	0.599529	0.211546	0.75074	0.104551	0.450576	0.118515	0.655139	0.0672318	0.486651	0.127116	0.467372	0.114125	0.520214	0.107255	0.498249	0.0983516	0.493035	0.0320812
1115	BRIP1_Y916_S919P	BRIP1	Y916	VTSLKYSTPPY	2	0.389008	0.0459982	0.365939	0.103855	0.39557	0.0857368	0.483316	0.152953	0.565113	0.0980989	0.625406	0.111979	0.351718	0.0542704	0.680903	0.148039	0.358042	0.0798738	0.514583	0.140362	0.35461	0.0613391	0.344071	0.0961714	0.386696	0.0897929
1116	BRIP1_Y916_S919P_YF	BRIP1	Y916	VTSLKYSTPPF	1	0.436491	0.0398261	0.472091	0.221806	0.520348	0.0914222	0.595371	0.0188894	0.599203	0.211764	0.60738	0.141686	0.379691	0.123786	0.840929	0.282404	0.490749	0.0964023	0.517008	0.0418627	0.341788	0.0796163	0.492661	0.155969	0.457025	0.0675442
1117	BRIP1_Y916_YF	BRIP1	Y916	VTSLKYSTSPF	1	0.403275	0.0466612	0.433335	0.0537086	0.464365	0.104596	0.482042	0.112422	0.711405	0.0599448	0.605049	0.149814	0.408437	0.0896575	0.694661	0.113658	0.435094	0.0805243	0.689111	0.106268	0.468661	0.0702432	0.506884	0.129164	0.411696	0.077418
1118	BRIP1_Y921	BRIP1	Y921	YSTSPYLLEAA	2	2.20822	0.246614	4.66526	1.34502	1.07566	0.649043	0.959172	0.11703	0.694287	0.10697	0.887442	0.172475	0.529562	0.183806	0.930661	0.175047	0.550639	0.118709	0.60428	0.0403297	0.544437	0.125633	0.517891	0.183206	1.37492	0.190302
1119	BRIP1_Y921_S919P	BRIP1	Y921	YSTPPYLLEAA	2	1.6022	0.255157	1.5574	0.594079	1.61153	0.633008	1.79866	0.315706	1.0383	0.139242	1.76807	0.460162	1.08639	0.412435	1.16788	0.642982	1.1591	0.361792	0.934686	0.0574061	0.664462	0.0330092	0.711419	0.203854	3.62707	0.554181
1120	BRIP1_Y921_S919P_YF	BRIP1	Y921	FSTPPYLLEAA	1	0.669475	0.185508	0.61861	0.183676	0.434436	0.202972	0.760326	0.137092	0.908515	0.1141	0.950397	0.376061	0.579362	0.161438	0.999674	0.197859	0.629567	0.318676	0.706642	0.236738	0.520769	0.178556	0.600877	0.218158	0.497294	0.0853015
1121	BRIP1_Y921_YF	BRIP1	Y921	FSTSPYLLEAA	1	1.57052	0.161546	3.4921	1.05373	0.556701	0.272274	0.457566	0.145079	0.723677	0.067593	0.782024	0.155823	0.475402	0.161402	0.96173	0.202215	0.407899	0.133497	0.666876	0.233462	0.48754	0.251483	0.493567	0.173051	0.436752	0.145009
1122	BSCL2_Y213	BSCL2	Y213	QLYGAYLRIHA	2	3.58539	0.883011	7.20776	1.67198	4.31712	1.48643	0.915455	0.346307	1.19979	0.162197	1.94619	0.880926	0.536257	0.158451	1.68314	0.869143	1.02392	0.332346	1.12074	0.488907	1.00254	0.691247	1.30009	0.805661	0.905362	0.589097
1123	BSCL2_Y213_A212P	BSCL2	Y213	QLYGPYLRIHA	2	2.52424	0.352655	2.03706	0.383055	2.83036	0.509834	0.611752	0.255132	0.974004	0.116968	0.870178	0.290781	0.596461	0.292963	1.11781	0.245529	0.343672	0.219117	0.730082	0.267248	0.896839	0.0732555	2.03295	0.631652	0.538289	0.107475
1124	BSCL2_Y213_A212P_YF	BSCL2	Y213	QLFGPYLRIHA	1	0.784513	0.588154	0.587738	0.241006	0.515263	0.270451	0.627636	0.220208	1.35147	0.0740744	1.24496	0.386982	0.427089	0.180757	1.56356	0.516371	0.733154	0.191822	1.02802	0.441727	1.12828	0.383113	0.548081	0.541788	0.484869	0.243388
1125	BSCL2_Y213_YF	BSCL2	Y213	QLFGAYLRIHA	1	0.559262	0.219645	0.784131	0.341041	1.0167	0.623422	0.744478	0.171264	1.36848	0.34608	1.49033	0.355943	0.837069	0.481989	2.1251	0.534349	0.927885	0.467959	2.28373	1.81423	1.1706	0.849429	0.914958	0.715772	0.598515	0.206532
1126	BST2_Y6	BST2	Y6	MASTSYDYCRV	2	0.577311	0.0563282	0.481283	0.0840821	0.905456	0.239853	0.956307	0.763796	0.687282	0.0206818	1.11341	0.658876	2.68692	0.681259	0.679655	0.0845592	1.27093	0.48239	0.851358	0.378168	4.88082	1.04591	3.50742	1.0886	0.904039	0.257758
1127	BST2_Y6_T4I	BST2	Y6	MASISYDYCRV	2	0.589332	0.0417843	0.564768	0.144306	1.01878	0.487754	0.708323	0.129349	1.09287	0.0549823	1.58199	0.588692	2.32831	0.516166	0.90839	0.215485	1.32319	0.295931	1.10469	0.4402	4.16767	0.901602	3.29108	1.16378	0.750112	0.108848
1128	BST2_Y6_T4I_YF	BST2	Y6	MASISYDFCRV	1	0.496711	0.0986286	0.554435	0.191731	0.628665	0.163566	0.907714	0.146051	1.03132	0.0759219	1.23737	0.171162	1.59053	0.306047	1.17385	0.0976717	0.496089	0.150872	0.823858	0.317884	0.691732	0.313984	0.711771	0.220285	0.653369	0.0590409
1129	BST2_Y6_YF	BST2	Y6	MASTSYDFCRV	1	0.52453	0.0505119	0.485746	0.0691071	0.472559	0.132951	0.622063	0.116554	0.796289	0.113309	0.944075	0.268552	2.24493	0.793816	0.918601	0.199701	0.571909	0.138546	0.828911	0.398014	0.575652	0.068123	0.613272	0.151024	0.708983	0.125683
1130	BST2_Y8	BST2	Y8	STSYDYCRVPM	2	1.13229	0.341356	0.711059	0.165878	2.21858	0.182089	1.10721	0.134504	2.55095	0.257886	3.77313	1.62318	4.36734	0.555581	0.892039	0.185719	7.46278	0.678893	5.33704	1.99496	11.6659	3.69074	10.253	4.2205	3.24276	0.480659
1131	BST2_Y8_T4I	BST2	Y8	SISYDYCRVPM	2	1.16653	0.257585	0.964644	0.181979	2.62091	0.413674	1.03488	0.153264	3.04733	0.378152	3.91253	2.14309	3.87288	0.631108	1.17291	0.179067	7.83897	0.555937	5.45541	2.01354	11.0361	3.01873	9.94744	3.6449	2.97967	0.356179
1132	BST2_Y8_T4I_YF	BST2	Y8	SISFDYCRVPM	1	0.527591	0.11872	0.463353	0.0756454	0.545661	0.140108	0.78519	0.219707	1.42581	0.203244	1.64996	0.141654	0.533322	0.089733	1.14957	0.264369	1.42776	0.364925	1.38871	0.244872	2.12694	0.902075	1.36096	0.454737	0.547289	0.180924
1133	BST2_Y8_YF	BST2	Y8	STSFDYCRVPM	1	0.957453	0.241311	0.827842	0.227685	1.57362	0.523615	0.931504	0.220122	2.03378	0.23845	2.98282	1.42067	0.826627	0.156896	1.3223	0.283796	5.41203	1.03274	3.9659	1.89024	9.02832	1.04609	5.96162	1.50105	0.902655	0.22975
1134	BTD_Y536	BTD	Y536	VTAALYGRLYE	2	4.81148	0.332889	5.26119	1.24501	5.14991	1.92934	0.888215	0.227041	0.903932	0.101555	0.882699	0.106358	1.30729	0.334255	1.04434	0.150487	0.498376	0.134427	0.723721	0.220195	1.06122	0.0604055	1.42762	0.461448	2.68277	0.197383
1135	BTD_Y536_R538C	BTD	Y536	VTAALYGCLYE	2	4.26393	0.642477	5.14182	0.818146	4.011	0.33794	0.954431	0.291669	1.23837	0.121531	1.34502	0.238194	2.6709	0.404734	1.42571	0.285927	0.558206	0.0410066	0.82456	0.22868	1.34506	0.363032	1.47149	0.362177	2.10737	0.22363
1136	BTD_Y536_R538C_YF	BTD	Y536	VTAALYGCLFE	1	4.02746	0.454189	5.62685	0.826663	3.96712	0.122669	1.02045	0.309848	1.12724	0.128331	1.30419	0.167871	1.09983	0.0659545	1.55466	0.290291	0.601821	0.130057	0.997643	0.267437	0.915724	0.335625	1.03125	0.326755	1.5397	0.295915
1137	BTD_Y536_T532M	BTD	Y536	VMAALYGRLYE	2	5.008	0.648259	5.86883	1.31311	5.58189	1.21075	0.799539	0.257956	0.863578	0.0904459	0.795015	0.1098	1.37471	0.258209	0.962732	0.182519	0.468043	0.141202	0.617084	0.304299	0.960501	0.138993	1.41888	0.471052	3.00184	0.440975
1138	BTD_Y536_T532M_YF	BTD	Y536	VMAALYGRLFE	1	6.09661	0.75342	6.68267	1.71222	5.52873	1.16145	0.966697	0.177825	1.03005	0.148335	0.980848	0.108148	0.611616	0.122886	1.17797	0.142124	0.457006	0.13149	0.752213	0.187553	0.596581	0.0711891	0.743034	0.230259	1.34166	0.129675
1139	BTD_Y536_YF	BTD	Y536	VTAALYGRLFE	1	4.96757	0.551353	6.32336	1.57537	5.74281	1.78385	0.626422	0.117561	0.633455	0.07095	0.747584	0.113193	0.435521	0.0436176	0.733811	0.145704	0.43857	0.0717539	0.527176	0.0757463	0.53497	0.0912554	0.655923	0.2099	1.07934	0.122058
1140	BTK_Y334	BTK	Y334	GVIRHYVVCST	1	0.444242	0.0826463	0.535397	0.120166	0.535914	0.171829	0.870461	0.220388	1.11976	0.247731	1.13133	0.121164	0.566044	0.039484	1.25416	0.14309	0.554864	0.0434174	0.812826	0.262886	0.67971	0.260827	0.711921	0.199914	0.44737	0.0761971
1141	BTK_Y334_Y334S	BTK	Y334	GVIRHSVVCST	0	0.450317	0.0817232	0.419516	0.0422674	0.435942	0.0985367	0.607471	0.153028	0.670309	0.146942	0.783398	0.071698	0.476962	0.0612365	0.820091	0.0883332	0.452581	0.085635	0.510422	0.0785563	0.508149	0.0767404	0.456186	0.0993859	0.446462	0.0412992
1142	BTK_Y361	BTK	Y361	PELINYHQHNS	1	0.680154	0.216409	0.64765	0.12347	0.689652	0.576659	0.561396	0.247451	0.99967	0.0277362	0.98144	0.384473	0.66368	0.306901	1.06172	0.605175	1.26586	0.975303	1.02202	0.411666	0.665976	0.119802	0.768553	0.359285	0.578541	0.1257
1143	BTK_Y361_H362Q	BTK	Y361	PELINYQQHNS	1	0.968523	0.359949	0.829481	0.259008	1.24629	0.526552	1.21827	0.210907	1.51615	0.0947067	1.10172	0.100358	0.742255	0.521397	1.38186	0.518854	0.763127	0.229818	0.790229	0.468018	0.790286	0.524655	0.821045	0.457297	0.988134	0.400684
1144	BTK_Y361_H364P	BTK	Y361	PELINYHQPNS	1	0.799921	0.173292	0.596667	0.255586	0.734059	0.210522	0.574334	0.347602	0.829422	0.0999028	0.927941	0.183613	0.678249	0.161919	0.907962	0.279969	0.722762	0.368845	0.85655	0.470953	1.03597	0.863059	0.727377	0.533329	0.656506	0.260914
1145	BTK_Y361_L358F	BTK	Y361	PEFINYHQHNS	1	1.03346	0.721113	0.551921	0.201392	0.484858	0.156592	0.490707	0.175756	0.93279	0.300124	0.708919	0.217035	0.33471	0.142954	0.606562	0.177554	0.820735	0.643551	0.946931	1.08648	0.299106	0.150236	0.51466	0.108052	0.507082	0.156266
1146	BTK_Y361_N365Y	BTK	Y361	PELINYHQHYS	2	0.500353	0.119691	0.661576	0.388187	0.355713	0.149951	0.56276	0.303591	0.577331	0.125796	0.741611	0.488504	0.426906	0.134265	0.687873	0.20273	0.76852	0.17624	0.585075	0.233523	1.23056	0.271753	1.67968	0.687174	0.319134	0.138607
1147	BTK_Y361_N365Y_YF	BTK	Y361	PELINYHQHFS	1	0.379761	0.0788043	0.5465	0.0733068	0.512743	0.104763	0.710866	0.371035	0.86881	0.255535	0.508425	0.129766	0.366451	0.0983493	0.869493	0.224704	0.591031	0.154854	0.799325	0.283683	0.723152	0.400523	0.439526	0.350891	0.400908	0.0838862
1148	BTK_Y361_S366F	BTK	Y361	PELINYHQHNF	1	0.942001	0.62002	0.789216	0.143492	0.836118	0.182247	0.918984	0.200091	1.01706	0.132309	1.04409	0.427723	0.735718	0.27277	1.24835	0.57209	0.850861	0.26224	0.597992	0.140292	0.630766	0.175772	0.825859	0.386557	0.695576	0.165149
1149	BTK_Y361_Y361C	BTK	Y361	PELINCHQHNS	0	0.689506	0.187835	0.297356	0.209212	0.543659	0.187169	0.875755	0.205058	0.970683	0.0697936	0.938394	0.263676	0.560407	0.178161	1.04422	0.357705	0.682019	0.19188	0.700329	0.266723	0.676148	0.399421	0.900483	0.589627	0.712175	0.0974174
1150	BTK_Y375	BTK	Y375	ISRLKYPVSQQ	1	0.341934	0.0626799	0.354568	0.0451232	0.351656	0.0957476	0.485867	0.12361	0.534137	0.142533	0.418819	0.0865624	0.318235	0.037256	0.589681	0.211624	0.317432	0.120433	0.398843	0.135198	0.331185	0.10458	0.38306	0.128211	0.31334	0.0878824
1151	BTK_Y375_I370M	BTK	Y375	MSRLKYPVSQQ	1	0.490906	0.0653749	0.472898	0.0748346	0.434602	0.0603245	0.573216	0.12575	0.540147	0.0564489	0.57255	0.0979619	0.375477	0.164862	0.705531	0.159678	0.43426	0.105593	0.620817	0.125429	0.413121	0.0925927	0.740843	0.436894	0.477859	0.0640949
1152	BTK_Y375_R372G	BTK	Y375	ISGLKYPVSQQ	1	0.407332	0.0973849	0.440665	0.10157	0.448249	0.103043	0.391642	0.105635	0.515771	0.0765408	0.529025	0.147336	0.371424	0.0359138	0.547794	0.0775167	0.42839	0.0624993	0.459062	0.124627	0.500556	0.114833	0.528847	0.25705	0.474292	0.115306
1153	BTK_Y40	BTK	Y40	HKLSYYEYDFE	3	2.47717	0.207707	2.12637	0.614389	0.95189	0.589399	1.25974	0.220478	1.60018	0.384522	1.86407	0.57113	0.640321	0.18238	2.12621	0.442203	7.25391	2.96896	4.03175	1.15163	2.02098	0.265562	1.37696	0.774215	3.66854	1.16496
1154	BTK_Y40_Y39S	BTK	Y40	HKLSSYEYDFE	2	1.42876	0.404718	0.719921	0.319511	0.952198	0.211784	0.966223	0.288	1.37792	0.390596	1.84053	1.24043	1.03547	1.0154	1.50717	0.741973	0.951878	0.263748	1.04074	0.658434	0.821677	0.665066	0.789229	0.601921	0.910948	0.40746
1155	BTK_Y40_Y39S_YF	BTK	Y40	HKLSSYEFDFE	1	1.09339	0.375916	0.777326	0.48743	0.564755	0.253592	1.42844	0.207172	2.13274	1.26847	1.83426	1.10596	0.664493	0.352897	1.51291	0.786373	0.889498	0.414686	0.844111	0.39608	0.901639	0.701765	0.749629	0.211388	0.864644	0.161354
1156	BTK_Y40_Y40C	BTK	Y40	HKLSYCEYDFE	2	2.45842	0.186629	1.6818	0.451734	0.746107	0.390958	0.871346	0.224473	1.28683	0.16304	1.77628	0.552958	0.687288	0.243109	1.76468	0.43173	0.76243	0.239108	1.34161	0.531787	0.857206	0.449608	1.14447	0.37905	0.534837	0.261173
1157	BTK_Y40_Y40C_YF	BTK	Y40	HKLSFCEFDFE	0	1.03292	0.23309	0.763658	0.251897	0.829812	0.181593	1.7773	1.5346	2.48132	0.58052	3.32865	2.63416	0.965079	0.453942	3.39727	2.46462	0.844453	0.387772	1.34118	0.422052	0.934178	0.104724	0.787497	0.204726	0.775993	0.0895454
1158	BTK_Y40_Y40N	BTK	Y40	HKLSYNEYDFE	2	2.02157	0.601255	3.25736	2.01669	0.73955	0.271417	0.592791	0.0910475	0.968	0.20521	1.26869	0.34154	0.472648	0.0855952	1.12852	0.144985	0.755889	0.356379	0.822078	0.16054	0.985991	0.431186	0.823756	0.53852	0.427483	0.100025
1159	BTK_Y40_Y40N_YF	BTK	Y40	HKLSFNEFDFE	0	0.863679	0.0943002	0.833682	0.552701	0.917682	0.128656	1.01589	0.272334	1.53007	0.222747	1.60946	0.383181	0.787776	0.0562885	1.57925	0.248551	0.794846	0.463164	0.88243	0.405077	0.828593	0.345459	0.859155	0.467274	0.712169	0.31545
1160	BTK_Y40_YF	BTK	Y40	HKLSFYEFDFE	1	1.23503	0.247276	1.65599	0.504964	0.988675	0.221545	1.50568	0.272855	2.9157	1.1699	1.7288	0.64128	0.919379	0.607066	1.7323	0.656179	1.00767	0.563598	1.3594	0.651265	0.752468	0.225306	0.785962	0.43775	1.75002	0.631113
1161	BTK_Y425	BTK	Y425	KWRGQYDVAIK	1	0.567351	0.135761	0.491403	0.166292	0.479075	0.176447	0.802314	0.520214	0.543149	0.120526	0.675723	0.212801	0.429378	0.115768	0.74154	0.184508	0.526792	0.0391712	0.545979	0.0851629	0.399292	0.0574348	0.641681	0.22084	0.463287	0.0573412
1162	BTK_Y425_I429N	BTK	Y425	KWRGQYDVANK	1	0.375632	0.0747863	0.358816	0.0809166	0.445203	0.105344	0.594018	0.157482	0.599785	0.236616	0.533014	0.0629106	0.446314	0.103689	0.705457	0.2902	0.438864	0.0358624	0.569719	0.0837848	0.380815	0.151207	0.39612	0.0522444	0.386677	0.0149812
1163	BTK_Y425_K430E	BTK	Y425	KWRGQYDVAIE	1	0.437372	0.0366653	0.389875	0.129562	0.509143	0.169606	0.537415	0.0917489	0.708071	0.152778	0.63053	0.105108	0.504957	0.4006	0.773633	0.11726	0.447874	0.0603253	0.48119	0.0897082	0.441268	0.112242	0.531301	0.165439	0.423563	0.0971338
1164	BTK_Y425_K430R	BTK	Y425	KWRGQYDVAIR	1	0.389067	0.0196869	0.445689	0.108605	0.451453	0.114935	0.53894	0.108622	0.461475	0.0902577	0.960121	0.610411	0.512278	0.087263	0.697796	0.201068	0.425967	0.109702	0.532522	0.17579	0.497998	0.246858	0.454212	0.202754	0.340671	0.0459326
1165	BTK_Y461	BTK	Y461	KLVQLYGVCTK	1	1.24501	0.207055	1.25294	0.38652	1.91225	0.296979	0.685801	0.145139	0.772862	0.0776552	0.847579	0.0965623	0.439287	0.121994	0.886942	0.121045	0.439202	0.0954267	0.531601	0.122632	1.32926	0.233908	1.43086	0.170254	0.892192	0.0940455
1166	BTK_Y461_G462D	BTK	Y461	KLVQLYDVCTK	1	1.55587	0.399166	1.36795	0.297332	4.92056	1.21682	1.24636	0.638874	0.790032	0.178685	0.994479	0.0982945	2.5634	0.82319	1.03188	0.206281	0.579579	0.0501527	0.741738	0.183306	12.1403	4.60193	11.748	5.45133	7.27133	0.391632
1167	BTK_Y461_G462V	BTK	Y461	KLVQLYVVCTK	1	0.485821	0.113637	0.415918	0.0965892	0.527777	0.185154	0.927729	0.243136	1.19999	0.0776399	1.30152	0.501616	0.584223	0.13934	1.16425	0.0718378	0.565098	0.0955441	0.785263	0.232571	0.809154	0.13154	0.522591	0.171695	0.450028	0.0865647
1168	BTK_Y511	BTK	Y511	CEAMEYLESKQ	1	0.838506	0.13152	0.556585	0.150239	0.751374	0.0978022	1.36349	0.343152	1.89446	0.139544	1.94358	0.669591	0.788021	0.329456	1.95182	0.739602	0.655046	0.292396	1.01298	0.46964	0.882364	0.180999	0.811286	0.405104	0.687737	0.0733317
1169	BTK_Y511_A508D	BTK	Y511	CEDMEYLESKQ	1	0.529817	0.0741353	0.49401	0.24506	0.642909	0.136067	0.827527	0.242921	1.217	0.0538939	1.30258	0.191306	0.652026	0.038432	1.34671	0.19615	0.475805	0.0905286	0.733571	0.217624	0.651909	0.1679	0.783309	0.376234	0.496648	0.0841467
1170	BTK_Y511_A508T	BTK	Y511	CETMEYLESKQ	1	0.530744	0.0993843	0.57757	0.149975	0.677179	0.289619	0.979766	0.201826	1.4262	0.0151888	1.60265	0.139342	0.705162	0.117816	1.5557	0.192173	0.687989	0.226907	0.965655	0.310221	0.736621	0.230787	0.734229	0.217004	0.526694	0.11286
1171	BTK_Y511_C506R	BTK	Y511	REAMEYLESKQ	1	0.701044	0.395277	0.702837	0.182091	0.504889	0.0980164	1.14726	0.345169	1.08922	0.261221	1.61683	0.654914	0.70427	0.129839	1.14644	0.229541	0.753536	0.612934	0.793752	0.414716	0.656686	0.113033	0.573077	0.113467	0.5014	0.0684951
1172	BTK_Y511_C506Y	BTK	Y511	YEAMEYLESKQ	2	0.567571	0.176732	0.654062	0.303025	0.805042	0.292993	0.836157	0.188351	1.13722	0.183732	1.83592	0.384235	3.05948	0.772637	1.28325	0.0689317	1.14486	0.71165	1.04147	0.375003	2.15053	0.60475	0.84336	0.294974	3.12161	1.22189
1173	BTK_Y511_C506Y_YF	BTK	Y511	FEAMEYLESKQ	1	0.426767	0.0793699	0.499055	0.177596	0.567098	0.216763	0.965794	0.229143	1.16465	0.0243042	1.24203	0.437974	0.542819	0.111502	1.36325	0.273249	0.5272	0.109882	0.993019	0.481492	0.534161	0.205541	0.682052	0.138097	0.473876	0.177384
1174	BTK_Y511_L512P	BTK	Y511	CEAMEYPESKQ	1	0.548046	0.0803757	0.54311	0.114509	0.572161	0.231703	0.952116	0.261903	1.30328	0.0418067	1.27638	0.278086	0.704633	0.106006	1.42002	0.145211	0.571287	0.0778663	0.735899	0.232855	0.676008	0.236344	0.734732	0.16431	0.459501	0.14273
1175	BTK_Y511_L512Q	BTK	Y511	CEAMEYQESKQ	1	0.628842	0.0535731	0.630033	0.250629	0.705462	0.36658	0.765278	0.156713	1.18495	0.173521	1.56717	0.182602	0.608713	0.180552	1.4842	0.148082	0.722624	0.167334	1.07726	0.340426	0.759515	0.149997	0.556823	0.175918	0.588799	0.162894
1176	BTK_Y511_M509I	BTK	Y511	CEAIEYLESKQ	1	0.548761	0.0765105	0.485035	0.196046	0.55222	0.210188	0.816175	0.273084	1.3319	0.0893071	1.28726	0.160171	0.520821	0.0969421	1.39217	0.26643	0.5739	0.0742382	0.83509	0.272947	0.631217	0.0972759	0.552787	0.112126	0.460683	0.0619793
1177	BTK_Y511_M509V	BTK	Y511	CEAVEYLESKQ	1	0.519551	0.0632954	0.443419	0.0852612	0.613233	0.184708	0.738181	0.0867605	1.32476	0.186228	1.30281	0.198792	0.563846	0.213781	1.41312	0.198751	0.533925	0.195833	0.874536	0.264323	0.546105	0.250512	0.802322	0.188642	0.383822	0.136336
1178	BTK_Y617	BTK	Y617	QGLRLYRPHLA	1	0.438052	0.1038	0.461198	0.126643	0.436874	0.22257	0.774842	0.297934	1.1499	0.220749	1.15691	0.315718	0.542	0.0540924	1.12094	0.273784	0.501397	0.154857	0.75987	0.169995	0.515076	0.231909	0.696802	0.347584	0.381592	0.0494538
1179	BTK_Y617_A622P	BTK	Y617	QGLRLYRPHLP	1	0.418532	0.137254	0.400523	0.0826553	0.521578	0.295362	0.712271	0.260356	0.966702	0.338473	0.771943	0.214947	0.606463	0.299092	0.856644	0.398517	0.480203	0.124822	0.407639	0.169376	0.444392	0.243396	0.567635	0.374933	0.512397	0.139925
1180	BTK_Y617_G613D	BTK	Y617	QDLRLYRPHLA	1	0.473784	0.046878	0.504536	0.105536	0.548276	0.0395941	0.571463	0.102774	1.17086	0.184944	0.578224	0.237027	0.500023	0.0734843	0.93122	0.182221	0.35832	0.0861339	0.48777	0.192611	0.517454	0.199447	0.466958	0.411088	0.362545	0.117875
1181	BTK_Y617_P619A	BTK	Y617	QGLRLYRAHLA	1	0.522593	0.158001	0.576242	0.320481	0.497075	0.253298	0.853566	0.247516	0.877687	0.0596419	1.43309	0.730026	0.467045	0.245966	0.978292	0.214918	0.520839	0.206433	0.67704	0.124629	0.587478	0.253091	0.601919	0.339915	0.582086	0.129411
1182	BTK_Y617_P619S	BTK	Y617	QGLRLYRSHLA	1	0.510363	0.104909	0.57081	0.289874	0.379742	0.201921	0.801329	0.334051	0.749554	0.0330787	0.934529	0.307436	0.527391	0.458215	1.03889	0.226982	0.551781	0.118343	0.500404	0.202147	0.71822	0.165703	0.407664	0.280589	0.417368	0.0724954
1183	BTK_Y617_P619T	BTK	Y617	QGLRLYRTHLA	1	0.311874	0.126563	0.33907	0.0920427	0.316959	0.113903	0.447813	0.209013	0.57731	0.167357	0.508895	0.299698	0.420014	0.0649867	0.477988	0.150039	0.305632	0.144861	0.364888	0.0606638	0.358666	0.154712	0.485847	0.291573	0.333373	0.0466548
1184	BTNL2_Y91	BTNL2	Y91	MQMEEYRGWVE	1	0.55343	0.134493	0.408992	0.136236	0.463504	0.137068	0.545406	0.0964172	1.24819	0.462622	1.22418	0.279559	0.448867	0.174313	1.0708	0.133539	0.488187	0.129478	0.598878	0.0897825	0.503182	0.206093	0.710945	0.56927	0.422617	0.0989016
1185	BTNL2_Y91_W94R	BTNL2	Y91	MQMEEYRGRVE	1	0.437084	0.0371855	0.379345	0.0919384	0.459436	0.177994	0.458042	0.0617019	0.572743	0.0263449	0.754533	0.219363	0.423929	0.0499297	0.873627	0.119415	0.411422	0.109461	0.538857	0.083178	0.420528	0.136693	0.389558	0.185105	0.382956	0.0827418
1186	BUB1_Y538	BUB1	Y538	GNKENYGLPQP	1	0.391815	0.0616355	0.321495	0.0696634	0.342399	0.129836	1.26395	1.39917	0.532388	0.0149496	0.634027	0.0860725	0.352731	0.0915673	0.690427	0.147662	0.372003	0.0965284	0.609163	0.224198	0.489261	0.0682262	0.532514	0.141756	0.340827	0.0357342
1187	BUB1_Y538_N534D	BUB1	Y538	GDKENYGLPQP	1	0.433181	0.0648582	0.460619	0.166112	0.469025	0.198862	0.631527	0.114774	0.715453	0.0985662	0.873099	0.121315	0.418733	0.153698	0.858976	0.147978	0.451532	0.0994267	0.567213	0.129666	0.508785	0.165417	0.794369	0.340526	0.432316	0.103649
1188	C1orf162_Y120	C1orf162	Y120	GESLTYASTTF	1	2.62933	0.209376	2.24814	0.750159	2.68291	0.612589	1.18732	0.911653	0.505362	0.0340302	0.591973	0.0882173	0.520047	0.0913073	0.550624	0.208297	0.400623	0.0776815	0.408096	0.113477	0.49983	0.0914027	0.643669	0.220958	0.574497	0.0384585
1189	C1orf162_Y120_A121V	C1orf162	Y120	GESLTYVSTTF	1	0.664374	0.148714	0.568918	0.256358	0.621219	0.211024	0.494184	0.0582967	0.691327	0.153769	0.953554	0.126824	0.512043	0.126168	1.07024	0.486531	0.508037	0.104791	0.619525	0.110787	0.532073	0.13346	0.563266	0.342256	0.538066	0.200054
1190	C1QBP_Y188	C1QBP	Y188	VLDCHYPEDEV	1	0.570714	0.0576149	0.463576	0.143091	0.628808	0.279388	0.919462	0.142749	1.30072	0.245388	1.22305	0.397252	0.631673	0.131265	1.27309	0.305799	0.595919	0.230398	0.880068	0.305632	0.589228	0.184832	0.724837	0.331958	0.555845	0.114367
1191	C1QBP_Y188_C186S	C1QBP	Y188	VLDSHYPEDEV	1	0.52493	0.108748	0.47271	0.179674	0.515885	0.102182	0.745971	0.106534	1.15659	0.233609	1.3313	0.264607	0.509878	0.0876383	1.26278	0.0592898	0.520178	0.112571	0.736028	0.216298	0.611311	0.229186	0.56383	0.166373	0.487721	0.119146
1192	C1QTNF1_Y145	C1QTNF1	Y145	RCKSHYAAFSV	1	1.06682	0.102764	1.39967	0.54651	1.41938	0.761456	4.73853	1.68722	0.736864	0.239836	1.41313	1.05523	1.45896	0.329851	1.35036	0.521563	1.10225	0.945497	0.983476	0.633663	1.43368	0.952124	0.903207	0.34924	2.89423	1.72625
1193	C1QTNF1_Y145_S143N	C1QTNF1	Y145	RCKNHYAAFSV	1	0.633182	0.179037	0.414889	0.152932	0.615466	0.105777	0.720011	0.214307	0.629782	0.243501	0.537554	0.177265	0.488439	0.303107	0.749448	0.197295	0.488445	0.0601429	0.560078	0.0936186	0.286013	0.0368763	0.562284	0.265641	0.571548	0.154378
1194	C3orf33_Y164	C3orf33	Y164	VSKGGYFSVNL	1	0.440141	0.16455	0.485271	0.149278	0.483112	0.113962	0.681659	0.0761357	1.08512	0.175513	0.874838	0.0886832	0.42289	0.0975999	0.972325	0.124195	0.427807	0.145122	0.599445	0.148584	0.555997	0.264774	0.672368	0.273736	0.417554	0.0604256
1195	C3orf33_Y164_S160N	C3orf33	Y164	VNKGGYFSVNL	1	0.397779	0.0715659	0.456141	0.193891	0.411109	0.126163	0.687887	0.174628	1.22556	0.0772455	0.832401	0.198617	0.394728	0.118241	1.04988	0.165681	0.59898	0.140171	0.602609	0.114758	0.553447	0.122729	0.411437	0.155155	0.411607	0.116895
1196	C4BPA_Y470	C4BPA	Y470	KLSCSYSHWSA	1	0.672203	0.0516078	0.578057	0.168799	0.636262	0.250071	1.14831	0.612022	0.89358	0.0699453	1.1294	0.0838558	0.657194	0.100608	1.28109	0.20765	0.792545	0.103539	0.910296	0.184908	0.716205	0.153603	0.771443	0.267831	0.527389	0.0759407
1197	C4BPA_Y470_W473L	C4BPA	Y470	KLSCSYSHLSA	1	0.583744	0.118265	0.572351	0.101151	0.512759	0.134724	0.782324	0.200538	1.06423	0.0922053	1.15271	0.446482	0.54952	0.123964	1.20869	0.202049	0.574242	0.0880323	0.741796	0.268863	0.534733	0.175303	0.588191	0.211433	0.579811	0.0260317
1198	C5orf42_Y1451	C5orf42	Y1451	PGVDRYSLGTS	1	0.737186	0.353016	0.701828	0.468057	0.678117	0.195102	0.74095	0.404315	0.769014	0.204685	0.789027	0.222556	0.569593	0.216392	0.972671	0.529115	0.754674	0.284227	0.745295	0.32085	0.576617	0.330123	0.788383	0.303243	0.788155	0.287345
1199	C5orf42_Y1451_P1446A	C5orf42	Y1451	AGVDRYSLGTS	1	0.390661	0.0794501	0.360801	0.0926293	0.454876	0.0897821	0.38826	0.0523254	0.497835	0.0726013	0.589644	0.0957067	0.398066	0.0610576	0.599297	0.116237	0.397761	0.0312174	0.510063	0.110536	0.462906	0.214877	0.365707	0.0937342	0.394364	0.0365727
1200	C5orf64_Y60	C5orf64	Y60	LTAEVYFPSIK	1	0.749967	0.195366	1.02242	0.74865	1.06286	0.610929	1.63967	0.429706	0.995905	0.166353	1.77894	0.484453	0.962826	0.559357	2.04172	0.572958	0.865704	0.43151	1.8767	1.38637	0.966242	0.262347	0.90579	0.492139	0.647682	0.160282
1201	C5orf64_Y60_A57T	C5orf64	Y60	LTTEVYFPSIK	1	0.563388	0.170952	0.769964	0.37192	0.540963	0.405947	0.765667	0.16912	0.702869	0.119164	0.945873	0.301571	0.482124	0.305141	0.895193	0.263078	0.775386	0.274163	0.660559	0.16914	0.436108	0.255103	0.627675	0.244713	0.561606	0.236625
1202	C7orf57_Y70	C7orf57	Y70	ETDSEYVKLAK	1	0.391255	0.0701808	0.433081	0.15018	0.425416	0.170603	0.588185	0.15309	0.690472	0.124904	0.934322	0.295212	0.335338	0.113916	0.817027	0.117836	0.376802	0.044761	0.477563	0.0733332	0.441304	0.106735	0.491786	0.285625	0.397779	0.136043
1203	C7orf57_Y70_A74S	C7orf57	Y70	ETDSEYVKLSK	1	0.450986	0.135264	0.532938	0.207938	0.604448	0.160151	0.694764	0.169242	1.01325	0.193901	1.00563	0.304107	0.499056	0.0364052	1.13331	0.121624	0.516171	0.142406	0.666558	0.236111	0.524352	0.114672	0.629794	0.378118	0.435444	0.0497879
1204	C9orf24_Y126	C9orf24	Y126	NKYTTYLPRLP	2	0.616074	0.103265	0.510362	0.0593174	0.714118	0.24426	0.624622	0.196111	0.705533	0.0956214	0.574886	0.206759	0.379881	0.164418	0.684499	0.0958446	0.402343	0.0879032	0.418455	0.103411	0.453527	0.140352	0.386097	0.0311967	0.482705	0.0769017
1205	C9orf24_Y126_R129W	C9orf24	Y126	NKYTTYLPWLP	2	4.71815	0.704248	6.7513	1.33991	8.09328	1.97511	1.9366	1.3635	2.33825	0.509948	1.08424	0.274508	9.65116	0.68458	0.943787	0.206678	2.77164	1.40621	2.2497	1.43564	6.8997	1.76239	12.7916	3.57007	3.36862	0.645785
1206	C9orf24_Y126_R129W_YF	C9orf24	Y126	NKFTTYLPWLP	1	4.54381	0.707701	5.7302	1.73304	8.26557	3.48425	1.59993	0.691945	1.75237	0.401304	1.04098	0.272622	6.84161	0.790534	1.0604	0.181643	1.42524	0.679826	1.25087	0.591738	3.62892	0.904243	6.60777	2.20863	1.39521	0.469692
1207	C9orf24_Y126_YF	C9orf24	Y126	NKFTTYLPRLP	1	0.424539	0.0814474	0.47673	0.0300358	0.507147	0.101704	0.481683	0.0912784	0.665702	0.213783	0.5677	0.168699	0.359867	0.168681	0.783969	0.134318	0.469808	0.10114	0.503018	0.164876	0.437195	0.11939	0.4453	0.145245	0.419518	0.0752776
1208	CABP5_Y62	CABP5	Y62	MRTMGYMPTEM	1	0.35522	0.0265668	0.388277	0.113527	0.4555	0.261224	0.446761	0.156899	0.506517	0.0120656	0.683296	0.241165	0.459305	0.158546	0.73245	0.326039	0.629712	0.344128	0.538119	0.172958	0.428494	0.115915	0.508858	0.173371	0.344075	0.093515
1209	CABP5_Y62_T65R	CABP5	Y62	MRTMGYMPREM	1	0.356246	0.0712387	0.437572	0.0576028	0.40522	0.117137	0.507309	0.0546996	0.606472	0.139505	0.494368	0.0828217	0.411272	0.0533825	0.594013	0.0992941	0.396571	0.0765763	0.507843	0.122632	0.368768	0.0729228	0.373587	0.0708361	0.434603	0.0980977
1210	CACNA1A_Y1013	CACNA1A	Y1013	GAPATYEGDAR	1	0.368114	0.0811048	0.387875	0.0756529	0.467426	0.158165	0.397146	0.107991	0.497123	0.155179	0.579738	0.0408683	0.565292	0.165217	0.66625	0.141419	0.542862	0.202948	0.509531	0.158243	0.354391	0.0437013	0.498881	0.130141	0.344773	0.0468168
1211	CACNA1A_Y1013_E1014K	CACNA1A	Y1013	GAPATYKGDAR	1	0.400937	0.0344904	0.365695	0.112141	0.384473	0.059944	0.567875	0.105631	0.488704	0.227371	0.432398	0.0863399	0.318809	0.0634269	0.519586	0.121747	0.418634	0.0656742	0.451827	0.135034	0.332263	0.111803	0.421752	0.0949725	0.383734	0.0862727
1212	CACNA1A_Y794	CACNA1A	Y794	SREALYNEMDP	1	0.869348	0.190579	0.684643	0.301328	0.834283	0.32398	0.851731	0.243974	1.13672	0.0480226	1.41072	0.237499	0.731039	0.08108	1.2362	0.182602	0.691783	0.100345	0.896041	0.139708	0.735345	0.0793649	0.692918	0.294625	2.35737	0.446704
1213	CACNA1A_Y794_M797T	CACNA1A	Y794	SREALYNETDP	1	0.721652	0.151086	0.623856	0.289196	0.739494	0.292505	0.996129	0.12823	1.13492	0.0380395	1.16177	0.131096	0.662761	0.100063	1.36972	0.159717	0.559012	0.0895624	0.815197	0.234336	0.670094	0.147657	0.642485	0.153484	0.624974	0.0731966
1214	CACNA1C_Y1757	CACNA1C	Y1757	GNHVSYYQSDG	2	0.57441	0.141594	0.461548	0.121357	0.570336	0.0676313	0.620593	0.274189	0.666826	0.0813559	0.774027	0.139849	0.490497	0.0983986	0.762044	0.110429	0.718206	0.0821083	0.809949	0.108584	0.557147	0.125128	0.484806	0.139176	0.809978	0.370802
1215	CACNA1C_Y1757_V1755I	CACNA1C	Y1757	GNHISYYQSDG	2	0.495939	0.0917014	0.514408	0.119164	0.397393	0.107659	0.403065	0.10514	0.483707	0.150981	0.820546	0.147848	0.367316	0.0560461	0.568702	0.0940092	0.65497	0.192468	0.56946	0.100365	0.667786	0.267409	0.399793	0.111394	0.410987	0.0534844
1216	CACNA1C_Y1757_V1755I_YF	CACNA1C	Y1757	GNHISYFQSDG	1	0.395017	0.0237004	0.418322	0.0511037	0.39204	0.0507055	0.511086	0.156156	0.566157	0.119168	0.742047	0.206931	0.390036	0.0606146	0.917832	0.467939	0.482664	0.136895	0.496211	0.147258	0.552055	0.0749572	0.439865	0.0526171	0.375603	0.0750976
1217	CACNA1C_Y1757_YF	CACNA1C	Y1757	GNHVSYFQSDG	1	0.419648	0.0353952	0.458448	0.0685621	0.44526	0.0494812	0.516541	0.0580702	0.636193	0.104781	0.656228	0.10913	0.368705	0.0934966	0.790812	0.0583611	0.495029	0.135359	0.48801	0.102217	0.37257	0.101642	0.426732	0.0967564	0.443275	0.0892229
1218	CACNA1C_Y1832	CACNA1C	Y1832	PRPAGYPSTVS	1	0.734582	0.301177	0.430438	0.0626444	0.250818	0.153595	0.653328	0.232337	0.549614	0.195013	0.457904	0.20521	0.330675	0.239178	0.493354	0.129433	0.333258	0.115296	0.446429	0.166903	0.327414	0.0975753	0.413348	0.399196	0.363035	0.183617
1219	CACNA1C_Y1832_G1831C	CACNA1C	Y1832	PRPACYPSTVS	1	0.484085	0.0908843	0.510439	0.173779	0.490021	0.0358426	0.436995	0.0834407	0.721149	0.216807	0.55413	0.201311	0.381029	0.134954	0.79171	0.264734	0.490456	0.0658976	0.598069	0.254878	0.57515	0.117661	0.435362	0.131392	0.356201	0.0824511
1220	CACNA1C_Y1832_T1835M	CACNA1C	Y1832	PRPAGYPSMVS	1	0.415689	0.246212	0.479937	0.126088	0.455761	0.158384	0.435335	0.0844747	0.474881	0.125075	0.677716	0.216829	0.41157	0.347155	0.668238	0.315004	0.386085	0.299204	0.363597	0.158944	0.392853	0.310473	0.561295	0.526373	0.365352	0.117187
1221	CACNA1H_Y519	CACNA1H	Y519	VHHLVYHHHHH	1	0.60167	0.120925	0.546381	0.136314	0.650274	0.116178	0.963264	0.166184	1.66281	0.789365	0.776823	0.160395	0.895636	0.36828	1.98576	0.793055	0.549722	0.170793	1.2334	0.830415	0.724691	0.140877	0.696442	0.152303	0.519832	0.057073
1222	CACNA1H_Y519_H516Y	CACNA1H	Y519	VHYLVYHHHHH	2	0.58656	0.0966474	0.537096	0.155702	0.631768	0.227259	1.39844	0.16084	1.4882	0.415535	1.17307	0.150487	0.678005	0.174619	2.16585	0.739302	0.700436	0.187956	1.06555	0.407228	0.687059	0.0613338	0.666463	0.170917	0.772693	0.330075
1223	CACNA1H_Y519_H516Y_YF	CACNA1H	Y519	VHFLVYHHHHH	1	0.452585	0.0706613	0.526594	0.0692066	0.415623	0.107871	0.863186	0.336306	1.11334	0.0690712	0.880071	0.207499	0.493285	0.142471	1.11314	0.303219	0.43732	0.128243	0.83414	0.394932	0.555021	0.113116	0.661341	0.104532	0.387915	0.0609901
1224	CACNB4_Y103	CACNB4	Y103	KTNVSYCGALD	1	0.469173	0.0730243	0.380704	0.168302	0.502652	0.161206	0.744549	0.162133	0.753999	0.205109	0.778275	0.134457	0.460368	0.0700469	0.833816	0.120056	0.493606	0.0578085	0.643461	0.219614	0.564175	0.1718	0.507688	0.144241	0.388629	0.0442474
1225	CACNB4_Y103_C104F	CACNB4	Y103	KTNVSYFGALD	1	0.437675	0.0472277	0.55434	0.128302	0.483977	0.132082	0.589826	0.0986966	0.652797	0.111738	0.788974	0.127403	0.463838	0.123	0.848172	0.116327	0.50915	0.0822672	0.633544	0.143162	0.437647	0.0854046	0.430387	0.120074	0.425645	0.0652576
1226	CAD_Y735	CAD	Y735	EPSVDYCVVKI	1	0.618113	0.108443	0.576697	0.198958	0.664263	0.210813	0.773719	0.1826	1.10396	0.226856	1.56552	0.351616	1.26073	0.228246	1.11348	0.118559	2.25478	0.860284	1.70955	0.972905	2.82589	0.752089	1.94559	0.512433	0.529207	0.0649238
1227	CAD_Y735_Y735C	CAD	Y735	EPSVDCCVVKI	0	0.369495	0.0454891	0.336321	0.162136	0.370766	0.0610316	0.815529	0.266903	1.00983	0.203786	1.07401	0.191354	0.410818	0.0907856	1.18428	0.206466	0.431993	0.116318	0.585878	0.145098	0.448631	0.104269	0.498612	0.125331	0.375746	0.0765515
1228	CAGE1_Y438	CAGE1	Y438	KSVSQYLEMDK	1	0.406392	0.095435	0.41367	0.162682	0.390777	0.109666	1.04564	0.787576	0.906926	0.444701	0.747644	0.107474	0.42366	0.0810612	0.803006	0.218117	0.459546	0.141379	0.537083	0.0757978	0.421553	0.0656063	0.406155	0.0957791	0.380022	0.0687167
1229	CAGE1_Y438_V435L	CAGE1	Y438	KSLSQYLEMDK	1	0.399635	0.0841885	0.444624	0.123507	0.415325	0.0787531	0.560426	0.058768	0.796696	0.186253	0.792724	0.0960287	0.348221	0.11598	0.835764	0.0781491	0.544869	0.202866	0.487339	0.0438398	0.382171	0.0496723	0.483259	0.0988172	0.445958	0.0667845
1230	CALCOCO2_Y358	CALCOCO2	Y358	FNSLPYQVPTS	1	0.560872	0.101262	0.467185	0.132426	0.559881	0.121684	2.55642	0.88068	0.61123	0.0449745	0.941512	0.399252	1.36394	0.500817	0.630409	0.221292	0.430865	0.0548049	0.577765	0.151719	0.463789	0.195106	0.504264	0.128917	1.33692	0.466884
1231	CALCOCO2_Y358_P357L	CALCOCO2	Y358	FNSLLYQVPTS	1	3.65478	0.145092	2.57702	0.109229	6.546	1.77954	17.8005	7.60407	2.09749	0.276909	2.76696	1.26273	15.0224	1.92744	1.06405	0.113247	1.17107	0.249733	1.31607	0.268234	12.0261	2.73453	18.8434	7.28993	12.5164	1.4365
1232	CALM1_Y100	CALM1	Y100	KDGNGYISAAE	1	0.415731	0.0506096	0.462645	0.105192	0.541796	0.0856397	0.546415	0.130051	0.684502	0.120691	0.64581	0.0911177	0.389265	0.0523929	0.759748	0.117505	0.476615	0.101094	0.593982	0.181831	0.393868	0.050189	0.491458	0.182413	0.469998	0.0388395
1233	CALM1_Y100_N98S	CALM1	Y100	KDGSGYISAAE	1	0.399822	0.0280984	0.475577	0.176611	0.443683	0.131326	0.543919	0.091721	0.600335	0.0203609	0.647768	0.144795	0.369131	0.0644679	0.820241	0.0987195	0.456015	0.0866196	0.495912	0.0790077	0.388077	0.0271389	0.409107	0.126802	0.463674	0.0299128
1234	CALM1_Y139	CALM1	Y139	DGQVNYEEFVQ	1	0.575808	0.0562602	0.505105	0.076772	0.626013	0.191826	0.956967	0.272055	1.19921	0.0300405	1.3307	0.190244	0.658928	0.103665	1.41941	0.183267	0.60779	0.0875443	0.840863	0.319725	1.62307	0.855144	1.2852	0.400049	0.486701	0.0215238
1235	CALM1_Y139_E141G	CALM1	Y139	DGQVNYEGFVQ	1	0.602623	0.139338	0.512176	0.17272	0.552644	0.240701	1.19446	0.445581	1.03947	0.266626	0.995921	0.148992	0.792531	0.119365	1.06784	0.184948	0.495948	0.174441	0.724343	0.155928	1.30976	0.355186	1.01522	0.16571	0.45317	0.158513
1236	CALM1_Y139_F142L	CALM1	Y139	DGQVNYEELVQ	1	0.613568	0.0319631	0.70386	0.161655	0.593515	0.146716	0.780938	0.174704	1.43272	0.343389	1.46703	0.452027	0.639342	0.0981678	1.25156	0.23324	0.818602	0.332712	0.734667	0.199642	1.04525	0.319195	0.825698	0.138625	0.658574	0.121645
1237	CALM2_Y100_D96V	CALM2	Y100	KVGNGYISAAE	1	0.391209	0.126284	0.337411	0.127048	0.392816	0.151509	0.537956	0.0189816	0.484724	0.131938	0.619271	0.132972	0.476308	0.0510373	0.649604	0.169309	0.455771	0.103371	0.587836	0.166719	0.400106	0.108847	0.468075	0.17034	0.420262	0.0668403
1238	CALM2_Y100_N98I	CALM2	Y100	KDGIGYISAAE	1	0.427386	0.07155	0.46649	0.068821	0.45364	0.115225	0.557148	0.00920918	0.588729	0.278132	0.635416	0.0565884	0.464228	0.12206	0.763282	0.134354	0.475998	0.154276	0.516794	0.0440951	0.393241	0.0345558	0.424001	0.0603549	0.476234	0.100431
1239	CALM2_Y139_D134H	CALM2	Y139	HGQVNYEEFVQ	1	0.803263	0.186895	1.28084	0.607177	1.36817	0.948054	0.91052	0.268447	1.23553	0.151933	1.89271	0.843389	1.26256	0.294708	1.92305	0.588206	0.795093	0.39601	1.01965	0.369821	6.37015	4.08564	5.80192	4.22516	0.919622	0.419791
1240	CALM2_Y139_Q136P	CALM2	Y139	DGPVNYEEFVQ	1	0.532334	0.145665	0.481767	0.091884	0.529142	0.132816	0.747618	0.129483	1.18265	0.215798	1.16681	0.269484	0.601199	0.146665	1.11626	0.228082	0.514263	0.0899306	0.724718	0.266908	1.27191	0.350533	1.08484	0.106316	0.474458	0.0308211
1241	CALM3_Y100_A103V	CALM3	Y100	KDGNGYISVAE	1	0.598438	0.308047	0.407205	0.139541	0.461916	0.0949018	0.67884	0.257332	0.671152	0.112475	0.770924	0.0970576	0.442268	0.0444168	0.859476	0.0696273	0.403843	0.07651	0.472565	0.0680597	0.361718	0.0826696	0.485347	0.165294	0.418114	0.0632255
1242	CAMK2A_Y106	CAMK2A	Y106	IVAREYYSEAD	2	0.547514	0.0338546	0.474374	0.161652	0.557128	0.143384	0.664079	0.104022	1.00863	0.0432274	1.03288	0.0546869	0.585522	0.152279	1.19489	0.17053	0.618259	0.0878656	0.810273	0.158095	0.557097	0.174599	0.552029	0.215479	0.455429	0.0530782
1243	CAMK2A_Y106_E109D	CAMK2A	Y106	IVAREYYSDAD	2	0.558585	0.20082	0.473304	0.130482	0.525422	0.199631	0.82826	0.117693	0.95852	0.0359299	1.04057	0.104381	0.589209	0.146805	1.1269	0.122101	0.657159	0.0969298	0.633322	0.103948	0.775106	0.222976	0.646875	0.280347	0.410395	0.0678055
1244	CAMK2A_Y106_E109D_YF	CAMK2A	Y106	IVAREYFSDAD	1	0.437694	0.0902838	0.378012	0.178427	0.415052	0.14065	0.799983	0.289788	0.79305	0.0811815	0.744139	0.121107	0.418143	0.0530851	0.922285	0.0763053	0.460512	0.0849807	0.582701	0.115755	0.480489	0.0605459	0.490816	0.163095	0.377891	0.0609115
1245	CAMK2A_Y106_YF	CAMK2A	Y106	IVAREYFSEAD	1	0.490974	0.0267711	0.537915	0.194261	0.500455	0.163739	0.727883	0.219893	0.965207	0.120657	1.08875	0.157822	0.563106	0.166201	1.15576	0.0849044	0.507762	0.055063	0.752499	0.100881	0.600036	0.16657	0.657032	0.280462	0.471966	0.117303
1246	CAMK2A_Y230	CAMK2A	Y230	IKAGAYDFPSP	1	0.485417	0.0314943	0.747193	0.277111	0.419276	0.016992	0.550519	0.0794478	0.547654	0.0808621	0.811144	0.149333	1.42677	0.554009	0.707788	0.148254	0.39706	0.0950498	0.461769	0.120363	0.361501	0.0884484	0.415634	0.104507	4.85155	0.814848
1247	CAMK2A_Y230_P235L	CAMK2A	Y230	IKAGAYDFPSL	1	0.388377	0.0185754	0.876857	0.332778	0.382311	0.0840709	0.540892	0.0701423	0.602878	0.0164121	0.760593	0.0481659	1.02918	0.43287	0.647038	0.127635	0.410134	0.0930679	0.484089	0.0810872	0.418101	0.0822621	0.493481	0.0552168	5.65583	0.861309
1248	CAMK2B_Y107_E110K	CAMK2B	Y107	IVAREYYSKAD	2	0.524927	0.0614942	0.423228	0.0441253	0.50738	0.105335	0.638508	0.0719738	0.697357	0.0932247	0.76796	0.250388	0.404999	0.0961169	0.84977	0.313594	0.429743	0.107001	0.504378	0.132063	0.466664	0.0852361	0.601672	0.29952	0.425201	0.075119
1249	CAMK2B_Y107_E110K_YF	CAMK2B	Y107	IVAREYFSKAD	1	0.341964	0.0448911	0.46947	0.185461	0.427356	0.206091	0.447972	0.0916405	0.54239	0.0547623	0.626841	0.133087	0.36793	0.0512143	0.692659	0.15336	0.434122	0.0668971	0.401719	0.0934257	0.420761	0.112071	0.437401	0.224738	0.358466	0.0671329
1250	CAMKK2_Y128	CAMKK2	Y128	CPSLPYSPVSS	1	0.786689	0.161611	0.54455	0.109216	0.496611	0.159955	0.654344	0.221714	0.904735	0.0793011	0.812547	0.124606	3.14377	1.49202	0.847007	0.218485	0.58753	0.0458457	0.699759	0.352418	0.490725	0.0953091	0.606968	0.195559	0.526721	0.0751902
1251	CAMKK2_Y128_C123Y	CAMKK2	Y128	YPSLPYSPVSS	2	0.546251	0.120679	0.457591	0.0816191	0.620351	0.166111	0.563701	0.277249	0.48925	0.18925	0.662746	0.130733	3.12658	0.984323	0.682713	0.128889	0.872563	0.408868	0.721031	0.152498	0.435637	0.150464	0.400656	0.101103	0.514376	0.132167
1252	CAMKK2_Y128_C123Y_YF	CAMKK2	Y128	FPSLPYSPVSS	1	0.456926	0.0784482	0.478957	0.21936	0.589754	0.233087	0.506916	0.181119	0.525603	0.128131	0.789066	0.269338	2.09749	0.717684	0.706897	0.136688	0.53898	0.168552	0.591973	0.123698	0.452075	0.145709	0.444846	0.252423	0.488854	0.0607442
1253	CAMKK2_Y128_P127L	CAMKK2	Y128	CPSLLYSPVSS	1	3.5004	0.0789105	1.87253	0.237782	6.1054	1.48263	1.06183	0.134262	1.27656	0.231365	1.43698	0.32901	12.1684	1.40692	2.01497	0.173955	1.38339	0.351227	1.35936	0.231141	4.73382	1.58826	4.12562	1.59193	8.18358	0.677322
1254	CAMKK2_Y183	CAMKK2	Y183	VVKLAYNENDN	1	0.403817	0.0303534	0.47761	0.135699	0.527276	0.243458	0.592069	0.0700423	0.624286	0.123253	0.855968	0.312623	0.484453	0.196934	0.897148	0.237645	0.517637	0.203755	0.671807	0.337204	0.449107	0.171373	0.550037	0.277295	0.373793	0.0708153
1255	CAMKK2_Y183_A182T	CAMKK2	Y183	VVKLTYNENDN	1	0.419022	0.0641989	0.46815	0.0662629	0.500297	0.123524	0.550642	0.172997	0.725737	0.200038	0.938602	0.046377	0.577381	0.123451	0.916702	0.123309	0.618469	0.296623	0.564157	0.0452642	0.491067	0.150195	0.545133	0.248474	0.466701	0.078171
1256	CAMKV_Y491	CAMKV	Y491	EEAAGYAQESQ	1	0.60365	0.170445	0.401098	0.0892467	0.660677	0.0479424	0.93513	0.300001	1.19515	0.250783	1.215	0.244597	0.54737	0.145157	1.3852	0.310234	0.544556	0.072306	0.691306	0.254945	0.523223	0.0742514	0.543283	0.273842	0.324732	0.0444802
1257	CAMKV_Y491_Y491C	CAMKV	Y491	EEAAGCAQESQ	0	0.491287	0.0621633	0.490676	0.202423	0.574969	0.14867	1.17519	0.598241	1.05741	0.185046	1.15004	0.223073	0.657394	0.0887236	1.22474	0.179441	0.526595	0.112989	0.832862	0.319248	0.644636	0.0758564	0.590843	0.183989	0.624668	0.126092
1258	CAMKV_Y95	CAMKV	Y95	VTRKEYFIFLE	1	0.694754	0.176728	0.480897	0.188356	0.429548	0.0861032	0.791529	0.147904	1.01482	0.110413	1.11299	0.367726	0.528201	0.104106	1.05844	0.187827	0.786434	0.157094	0.838341	0.129908	0.695839	0.210368	0.553702	0.110345	0.401417	0.0999626
1259	CAMKV_Y95_R92H	CAMKV	Y95	VTHKEYFIFLE	1	1.2901	0.148275	0.622527	0.23552	0.540065	0.227898	0.754515	0.290085	1.28572	0.173487	1.07933	0.106799	0.595897	0.104793	1.36114	0.242688	2.20126	1.22256	1.86717	0.736496	1.1325	0.35312	1.35971	0.282137	0.516444	0.10169
1260	CAP2_Y316	CAP2	Y316	TSPKSYPSQKH	1	0.466444	0.077302	0.434454	0.0946519	0.362704	0.103302	0.529908	0.0594948	0.462593	0.0881179	0.613326	0.293256	0.450166	0.106241	0.525828	0.0926129	0.357041	0.115324	0.497478	0.150916	0.364202	0.0494328	0.359195	0.0948462	0.439518	0.0822494
1261	CAP2_Y316_T311A	CAP2	Y316	ASPKSYPSQKH	1	0.366285	0.0487094	0.373781	0.116275	0.333144	0.0858697	0.484426	0.0795883	0.464019	0.108635	0.426122	0.144649	0.323195	0.0593771	0.511313	0.191172	0.356237	0.16522	0.405575	0.0721763	0.357578	0.141497	0.275859	0.0336928	0.356047	0.0785151
1262	CAP2_Y316_Y316C	CAP2	Y316	TSPKSCPSQKH	0	0.41509	0.0728798	0.460521	0.131991	0.472392	0.167483	0.688412	0.109645	0.730081	0.351798	0.545623	0.177681	0.384845	0.0970697	0.619383	0.218018	0.432272	0.0738151	0.521212	0.15778	0.384882	0.0810064	0.361449	0.121245	0.476262	0.098694
1263	CAPN1_Y494	CAPN1	Y494	LPPGEYVVVPS	1	0.641271	0.193701	0.880322	0.311532	0.669739	0.565262	1.30972	0.630168	1.31873	0.0640036	1.69848	0.678063	0.778038	0.49636	1.45278	0.458323	2.82774	1.05939	1.93054	0.541125	5.22632	1.52529	3.71846	1.75312	0.927102	0.348547
1264	CAPN1_Y494_G492R	CAPN1	Y494	LPPREYVVVPS	1	0.479778	0.214921	1.40455	1.41526	1.73005	1.66098	0.725567	0.173289	1.03671	0.177748	2.28591	2.6187	1.73277	1.79087	2.16451	2.12604	2.82932	1.83911	2.46089	1.78558	3.77621	2.4371	4.02172	3.47238	0.630818	0.548911
1265	CARD11_Y970	CARD11	Y970	LVRAFYCERRR	1	0.987571	0.245239	0.84445	0.416006	1.13468	0.774285	0.596834	0.245928	0.705396	0.16694	0.684368	0.430847	0.623744	0.417053	0.71291	0.260548	0.766363	0.171129	0.584699	0.356223	0.620073	0.281663	1.70951	1.7541	0.901854	0.451905
1266	CARD11_Y970_R975W	CARD11	Y970	LVRAFYCERRW	1	0.489023	0.0527914	0.649376	0.102391	0.634247	0.103412	0.695133	0.170445	0.857268	0.318876	1.05315	0.282697	0.589793	0.218492	0.745318	0.187921	0.574684	0.151741	0.69719	0.0711582	0.670619	0.192332	0.6229	0.187013	0.639771	0.196888
1267	CARD9_Y76	CARD9	Y76	TGHKGYVAFLE	1	0.393886	0.0943355	0.358168	0.0957096	0.49431	0.186533	0.617032	0.0796579	0.635006	0.0743004	0.673677	0.227204	0.402979	0.0967348	0.66583	0.0609596	0.413685	0.0509812	0.507468	0.118201	0.392144	0.0447915	0.466141	0.168613	0.39628	0.0721601
1268	CARD9_Y76_G72S	CARD9	Y76	TSHKGYVAFLE	1	0.35389	0.063561	0.352518	0.0994232	0.380447	0.0591278	0.602095	0.105616	0.676355	0.12045	0.706596	0.171925	0.314536	0.0470306	0.761626	0.169706	0.47662	0.121464	0.554133	0.113831	0.450875	0.0365242	0.40447	0.0454896	0.379868	0.0923797
1269	CARMIL1_Y637	CARMIL1	Y637	MPIPMYDASQA	1	0.459982	0.110607	0.642781	0.367698	0.552351	0.168367	0.824165	0.5852	0.717144	0.0606484	0.751385	0.237964	0.564589	0.226198	0.730277	0.128845	0.595155	0.209166	0.628718	0.149934	0.866976	0.105708	1.00945	0.346333	0.565559	0.0578493
1270	CARMIL1_Y637_A639G	CARMIL1	Y637	MPIPMYDGSQA	1	0.439849	0.117368	0.520447	0.130289	0.529581	0.182916	0.638919	0.11426	0.962539	0.274889	0.622512	0.0845687	0.401775	0.0855001	0.777046	0.199294	0.434274	0.0861105	0.532406	0.0679187	1.09733	1.18997	0.633703	0.502503	0.447098	0.0743342
1271	CASD1_Y382	CASD1	Y382	IMAYFYMCDRA	2	0.486604	0.0425246	0.42148	0.132596	0.40112	0.0945573	1.00517	0.370449	1.46267	0.295649	1.10776	0.335678	0.613674	0.171054	1.44576	0.3282	1.087	0.222095	1.22457	0.214086	0.803089	0.231488	0.641089	0.312846	0.493909	0.117736
1272	CASD1_Y382_R386S	CASD1	Y382	IMAYFYMCDSA	2	0.689769	0.0794895	0.522953	0.173179	0.510388	0.088738	1.06896	0.27335	1.93006	0.33862	1.3824	0.0943444	0.597292	0.355737	1.4994	0.382355	2.23571	0.767779	2.24624	0.277687	0.844574	0.283564	0.642869	0.181684	0.50493	0.13573
1273	CASD1_Y382_R386S_YF	CASD1	Y382	IMAFFYMCDSA	1	0.595701	0.195707	0.547613	0.205487	0.657928	0.278673	1.1141	0.41483	1.41403	0.200324	1.43902	0.16252	0.804684	0.18313	1.7825	0.347246	0.790512	0.267491	1.11601	0.633851	0.896451	0.438846	0.781558	0.106518	0.401418	0.0999001
1274	CASD1_Y382_YF	CASD1	Y382	IMAFFYMCDRA	1	0.570242	0.202733	0.570369	0.196877	0.544858	0.27309	1.0935	0.27735	1.63698	0.163652	1.48213	0.410879	0.67667	0.0722446	1.63002	0.317084	0.651915	0.224457	1.11558	0.394621	0.937565	0.223196	0.647983	0.206134	0.543914	0.0754861
1275	CASK_Y708	CASK	Y708	KKKKQYKDKYL	2	0.727871	0.130294	0.453931	0.15373	0.547577	0.0704008	0.836786	0.670576	0.475332	0.134817	0.61435	0.184504	0.586779	0.292135	0.534313	0.166478	0.505595	0.29769	0.470716	0.176567	0.529554	0.257675	0.392808	0.178549	0.631194	0.200457
1276	CASK_Y708_D710G	CASK	Y708	KKKKQYKGKYL	2	0.749828	0.0759952	0.570186	0.182468	0.513333	0.136466	0.528946	0.14144	0.506757	0.184326	0.666561	0.31078	0.444093	0.0542049	0.58183	0.209296	0.473861	0.066764	0.583954	0.128011	0.502299	0.0784476	0.540216	0.129671	0.628671	0.0313024
1277	CASK_Y708_D710G_YF	CASK	Y708	KKKKQYKGKFL	1	0.638251	0.071058	0.532436	0.186753	0.523069	0.160756	0.546939	0.09379	0.535433	0.198373	0.617041	0.375114	0.439192	0.0790004	0.525965	0.120746	0.485293	0.150597	0.578541	0.189879	0.447391	0.134525	0.549065	0.087214	0.533189	0.0669043
1278	CASK_Y708_YF	CASK	Y708	KKKKQYKDKFL	1	0.739304	0.0956349	0.700549	0.22943	0.589154	0.188102	0.698993	0.122245	0.724256	0.117684	0.892794	0.356815	0.501958	0.133524	0.642066	0.168964	0.571622	0.138167	0.550467	0.118135	0.687337	0.343067	0.63383	0.203213	0.781963	0.137118
1279	CASK_Y712	CASK	Y712	QYKDKYLAKHN	2	0.307948	0.0676118	0.436197	0.226091	0.207357	0.093549	0.457711	0.101258	0.605385	0.29246	0.400993	0.284501	0.349404	0.312388	0.927049	0.316799	0.52617	0.18457	0.66316	0.336199	0.500817	0.12872	0.402008	0.199596	0.283291	0.107009
1280	CASK_Y712_D710G	CASK	Y712	QYKGKYLAKHN	2	0.519169	0.113048	0.657548	0.446656	0.75196	0.414591	0.933737	0.685445	0.471533	0.143793	0.984127	0.334074	0.819443	0.331899	0.97922	0.414769	1.00662	0.965851	1.28595	0.535456	0.704576	0.34091	0.698784	0.540436	0.834596	0.338043
1281	CASK_Y712_D710G_YF	CASK	Y712	QFKGKYLAKHN	1	0.403818	0.104933	0.414709	0.174061	0.376421	0.167155	0.467031	0.131388	0.854856	0.514305	1.19466	1.24656	0.440911	0.314396	0.615818	0.306217	0.497851	0.235088	0.327128	0.118269	0.490253	0.0646181	0.526635	0.129017	0.632345	0.63689
1282	CASK_Y712_YF	CASK	Y712	QFKDKYLAKHN	1	0.34047	0.109847	0.266279	0.0729809	0.384255	0.194113	0.350006	0.282121	0.787624	0.379177	0.51896	0.112823	0.433271	0.164477	0.467195	0.199235	0.38255	0.21774	0.297737	0.227328	0.529876	0.19826	0.267801	0.192846	0.40315	0.130868
1283	CASP10_Y9	CASP10	Y9	QGQHWYSSSDK	1	0.552255	0.278284	0.671122	0.431649	0.754324	0.172578	0.697442	0.119901	0.645307	0.0863843	0.826244	0.275358	0.578867	0.0810811	1.17086	0.412981	0.665098	0.211309	0.599842	0.214287	0.76596	0.435823	0.596076	0.390277	0.572978	0.155478
1284	CASP10_Y9_K14T	CASP10	Y9	QGQHWYSSSDT	1	0.982298	0.286218	0.67199	0.0847021	0.573196	0.231156	1.05696	0.39981	1.99029	0.914967	1.09158	0.69498	0.755352	0.502017	1.39012	0.306674	0.656632	0.319877	0.901216	0.515651	0.859466	0.430685	0.928803	0.246099	0.811185	0.323444
1285	CASP5_Y103	CASP5	Y103	EEKKKYYDTKI	2	0.340447	0.0493889	0.479155	0.155084	0.400415	0.210561	0.617648	0.125295	0.875101	0.466857	0.81827	0.173225	0.464649	0.109155	0.852623	0.158992	0.467788	0.121708	0.514758	0.11044	0.441999	0.0373459	0.421143	0.0988197	0.366202	0.114078
1286	CASP5_Y103_T106A	CASP5	Y103	EEKKKYYDAKI	2	0.39631	0.0345042	0.371311	0.1555	0.411406	0.154295	0.565427	0.204351	0.847858	0.259898	0.626024	0.138441	0.44673	0.240648	0.76445	0.215312	0.529331	0.275722	0.51806	0.142992	0.467001	0.19264	0.432073	0.148915	0.429424	0.104556
1287	CASP5_Y103_T106A_YF	CASP5	Y103	EEKKKYFDAKI	1	0.478812	0.125075	0.400405	0.153414	0.442428	0.122231	0.580322	0.127496	0.684397	0.165382	0.798116	0.153101	0.401446	0.061969	0.818358	0.138839	0.4879	0.115054	0.464202	0.0227468	0.38506	0.0326706	0.429581	0.234977	0.500615	0.0579885
1288	CASP5_Y103_YF	CASP5	Y103	EEKKKYFDTKI	1	0.401548	0.040465	0.37418	0.181465	0.559026	0.288849	0.657202	0.231026	0.665099	0.0637785	0.927769	0.175015	0.45735	0.121958	0.954197	0.127377	0.447086	0.125702	0.518967	0.0939872	0.429394	0.126576	0.445246	0.250683	0.332357	0.0789197
1289	CASP5_Y104	CASP5	Y104	EKKKYYDTKIE	2	0.451582	0.0526353	0.485866	0.126036	0.511197	0.115075	0.761032	0.247335	0.77932	0.0467398	0.863137	0.140753	0.381341	0.0730267	1.03284	0.121859	0.365376	0.0646809	0.63709	0.157455	0.365862	0.0849245	0.518196	0.220736	0.443496	0.109088
1290	CASP5_Y104_T106A	CASP5	Y104	EKKKYYDAKIE	2	0.639566	0.232291	0.588184	0.158142	0.449207	0.122295	0.608969	0.174519	0.912177	0.0442275	0.776517	0.0797575	0.474533	0.123479	0.977922	0.191307	0.525855	0.179544	0.781367	0.352563	0.678671	0.369515	0.326134	0.139604	0.472612	0.149878
1291	CASP5_Y104_T106A_YF	CASP5	Y104	EKKKFYDAKIE	1	0.465927	0.0910471	0.369271	0.0564239	0.46842	0.172153	0.717511	0.131267	1.04821	0.100087	0.751046	0.262759	0.434864	0.0639513	0.802652	0.185282	0.431094	0.112421	0.534248	0.331588	0.400151	0.0582447	0.408948	0.134528	0.3495	0.07948
1292	CASP5_Y104_YF	CASP5	Y104	EKKKFYDTKIE	1	0.600109	0.132466	0.353358	0.0576946	0.503195	0.135449	0.652507	0.10232	0.883055	0.117274	0.771555	0.266915	0.446406	0.0530581	0.933226	0.24493	0.34171	0.100101	0.566753	0.310936	0.395893	0.206127	0.397246	0.184052	0.427854	0.0915535
1293	CASP5_Y74	CASP5	Y74	VKMLEYLGKDV	1	0.337466	0.056769	0.454347	0.0977783	0.490677	0.23416	0.569782	0.192738	0.591384	0.18418	1.0728	0.975928	0.412735	0.0936761	0.72635	0.23158	0.375387	0.114445	0.453031	0.0827613	0.422007	0.099547	0.650524	0.406927	0.503641	0.292532
1294	CASP5_Y74_L75R	CASP5	Y74	VKMLEYRGKDV	1	0.464998	0.117286	0.476101	0.198899	0.459679	0.198877	0.522587	0.0538507	0.791989	0.247082	0.679694	0.180314	0.494536	0.105363	0.737351	0.154875	0.48893	0.0681106	0.473224	0.105379	0.458767	0.0762259	0.416075	0.0982404	0.443135	0.0732928
1295	CASQ1_Y43	CASQ1	Y43	LDFPEYDGVDR	1	1.50083	0.244807	0.750401	0.303392	1.11105	0.330646	1.4806	0.343686	1.99509	0.0848355	2.59929	0.578984	0.719259	0.162093	2.00665	0.421393	0.589972	0.250946	1.36566	0.547094	0.632784	0.422374	0.864837	0.497424	0.556045	0.233388
1296	CASQ1_Y43_D44N	CASQ1	Y43	LDFPEYNGVDR	1	2.16889	0.517487	1.42483	0.840415	1.16341	0.918918	1.9539	0.538979	3.51104	1.59641	2.84104	1.44016	1.00322	0.459557	3.28577	1.45157	0.985505	0.595055	1.61031	0.891884	1.09083	0.397668	1.04063	0.892131	2.16557	2.30016
1297	CASQ2_Y178	CASQ2	Y178	SEDSEYYKAFE	2	0.697584	0.183751	0.620541	0.334082	0.609916	0.147734	0.695114	0.189948	1.17265	0.261447	1.71231	0.367766	0.535091	0.105053	1.15589	0.134341	0.57965	0.0822168	0.979577	0.294039	0.656115	0.108717	0.611025	0.218387	0.494134	0.0705129
1298	CASQ2_Y178_K180R	CASQ2	Y178	SEDSEYYRAFE	2	0.823531	0.108104	0.823227	0.375737	0.684719	0.278129	0.889705	0.137877	1.28737	0.125899	2.70333	1.11107	0.514741	0.02869	1.28846	0.161125	0.869063	0.273775	1.24332	0.359836	0.670002	0.165483	0.695986	0.206903	0.523286	0.0682043
1299	CASQ2_Y178_K180R_YF	CASQ2	Y178	SEDSEYFRAFE	1	0.693291	0.305789	0.545129	0.122537	0.523741	0.089965	1.31303	0.643292	1.25788	0.124282	1.99146	0.295795	0.511179	0.118756	1.48296	0.431884	0.586498	0.0818083	0.853934	0.126351	0.632589	0.0683668	0.591459	0.12165	0.476371	0.112546
1300	CASQ2_Y178_YF	CASQ2	Y178	SEDSEYFKAFE	1	0.650756	0.0575863	0.572348	0.226853	0.582427	0.161611	0.974176	0.22866	1.34027	0.436776	1.46003	0.20794	0.470875	0.16085	1.4057	0.227331	0.608176	0.110674	0.882122	0.279807	0.714027	0.130307	0.653452	0.257319	0.55718	0.0726415
1301	CASQ2_Y179	CASQ2	Y179	EDSEYYKAFEE	2	0.547045	0.0975487	0.425418	0.135755	0.508034	0.100176	0.792811	0.205326	1.10652	0.209494	1.36896	0.0763521	0.48702	0.105929	1.33625	0.148851	0.509696	0.0795641	0.741624	0.158539	0.525524	0.0163076	0.488807	0.058522	0.372234	0.0744212
1302	CASQ2_Y179_K180R	CASQ2	Y179	EDSEYYRAFEE	2	0.754255	0.186301	0.764709	0.138152	0.674802	0.256814	0.914997	0.263167	1.36821	0.304476	2.96396	0.393185	0.518384	0.136262	1.5988	0.262103	0.937026	0.256532	1.25933	0.129262	0.822777	0.138703	0.724078	0.181026	0.497347	0.125441
1303	CASQ2_Y179_K180R_YF	CASQ2	Y179	EDSEFYRAFEE	1	0.494345	0.120291	0.537961	0.183708	0.513243	0.181647	0.770779	0.273268	1.02479	0.225754	1.15028	0.117993	0.489067	0.0455115	1.07104	0.174626	0.473377	0.070931	0.848098	0.193185	0.581837	0.161769	0.52489	0.196689	0.448898	0.0626523
1304	CASQ2_Y179_YF	CASQ2	Y179	EDSEFYKAFEE	1	0.567354	0.106516	0.441786	0.156645	0.542555	0.202501	0.693288	0.152184	1.07266	0.256126	1.19769	0.295395	0.399789	0.0683888	1.20951	0.163297	0.482208	0.0614186	0.73889	0.157202	0.53388	0.200864	0.659309	0.178336	0.453879	0.0533393
1305	CAT_Y358	CAT	Y358	GRLFAYPDTHR	1	0.355576	0.0506818	0.420955	0.117135	0.396912	0.125213	0.597132	0.0321218	0.604593	0.0942236	0.640967	0.122753	0.475531	0.152191	0.755596	0.141183	0.440239	0.067244	0.538272	0.160256	0.489718	0.12383	0.434445	0.132936	0.34421	0.0696918
1306	CAT_Y358_R363C	CAT	Y358	GRLFAYPDTHC	1	0.402943	0.045218	0.465743	0.162371	0.481128	0.110101	0.749687	0.18107	0.785329	0.151148	0.784241	0.0407629	0.478944	0.0380096	1.0548	0.149862	0.466294	0.0700273	0.687436	0.280722	0.556081	0.0971406	0.512263	0.155334	0.43248	0.0379853
1307	CAT_Y386	CAT	Y386	ARVANYQRDGP	1	0.54522	0.0590077	0.435674	0.0827706	0.386288	0.0851799	0.496104	0.101771	0.485807	0.0658919	0.784895	0.209212	0.393735	0.14998	0.607084	0.223362	0.523815	0.0550863	0.525916	0.151123	0.564066	0.250784	0.405624	0.0948886	0.574315	0.107334
1308	CAT_Y386_Q387H	CAT	Y386	ARVANYHRDGP	1	0.395349	0.0135628	0.440031	0.0470766	0.360388	0.0748739	0.457087	0.0487668	0.491185	0.043765	0.523201	0.123885	0.372236	0.0786028	0.514427	0.0381642	0.51913	0.416337	0.393616	0.0641651	0.308539	0.103663	0.37773	0.103614	0.385146	0.0133828
1309	CBFB_Y96	CBFB	Y96	EAGKVYLKAPM	1	0.433567	0.065127	0.492257	0.149685	0.4961	0.226931	0.503863	0.164134	0.669015	0.0485482	0.754446	0.170106	0.410612	0.0686529	0.939016	0.223181	0.432896	0.0410628	0.608641	0.0261413	0.443132	0.116877	0.524411	0.104283	0.602127	0.552875
1310	CBFB_Y96_P100A	CBFB	Y96	EAGKVYLKAAM	1	0.448593	0.107614	0.408103	0.159216	0.493991	0.143533	0.774543	0.193983	1.25668	0.0692342	1.03088	0.110545	0.56801	0.0881002	1.26085	0.209491	0.673906	0.505101	0.742055	0.460869	0.564772	0.146295	0.48401	0.174064	0.332638	0.0798307
1311	CBL_Y368	CBL	Y368	VTQEQYELYCE	2	0.892227	0.11966	0.684275	0.329039	0.988872	0.469004	0.882543	0.0979983	1.17256	0.104934	1.7474	0.158905	0.886993	0.148419	1.32508	0.195701	0.621883	0.0420716	0.893716	0.187656	0.814336	0.0992454	0.710091	0.138854	0.570686	0.0583654
1312	CBL_Y368_Q367P	CBL	Y368	VTQEPYELYCE	2	1.24365	0.191958	0.760892	0.240609	0.717085	0.280083	0.739542	0.176742	0.998984	0.156787	1.65165	0.287	0.859545	0.314231	1.12572	0.145042	0.554493	0.0960402	0.793566	0.21698	0.762678	0.430123	0.620917	0.312693	0.461321	0.0558216
1313	CBL_Y368_Q367P_YF	CBL	Y368	VTQEPYELFCE	1	1.19291	0.154562	0.79345	0.397102	0.569011	0.327687	0.817206	0.385723	0.997599	0.124683	1.58055	0.272743	1.1463	0.299865	1.31766	0.130397	0.649289	0.1289	0.937627	0.255847	0.74023	0.240782	0.687135	0.246492	0.591704	0.183822
1314	CBL_Y368_Y371H	CBL	Y368	VTQEQYELHCE	1	0.519862	0.0860245	0.575823	0.19706	0.478877	0.169109	0.79127	0.479741	1.09726	0.0869858	1.20166	0.107235	0.735914	0.0876068	1.34763	0.257332	0.54165	0.090304	0.873946	0.40062	0.707875	0.128441	0.600594	0.233976	0.369874	0.0785398
1315	CBL_Y368_YF	CBL	Y368	VTQEQYELFCE	1	0.743896	0.129393	0.598937	0.18571	0.64581	0.10162	3.12153	4.20536	1.53905	0.304905	1.39985	0.53178	0.737201	0.295418	1.23461	0.352484	0.543184	0.19995	0.956562	0.394714	0.859943	0.291494	0.848121	0.455106	0.624163	0.106361
1316	CBL_Y371	CBL	Y371	EQYELYCEMGS	2	4.14256	0.30432	4.25596	0.281598	5.34673	0.781227	1.08548	0.334226	1.3679	0.120976	3.79822	1.55202	3.6957	0.655526	1.60788	0.316532	4.54785	1.53264	4.12444	1.66189	7.29372	0.734143	8.67776	2.19888	5.02909	0.669349
1317	CBL_Y371_Q367P	CBL	Y371	EPYELYCEMGS	2	4.82074	0.47995	4.1315	1.54389	4.22422	0.809471	2.35579	2.71648	1.61301	0.0852429	3.70936	0.687335	3.51455	0.439939	1.736	0.2364	3.5424	0.786297	3.14371	1.14532	5.72644	0.894702	6.42516	2.2355	3.54472	0.138434
1318	CBL_Y371_Q367P_YF	CBL	Y371	EPFELYCEMGS	1	1.21076	0.128366	1.26521	0.37973	1.50962	0.452525	0.847867	0.307414	1.37522	0.282924	1.67821	0.148663	0.749231	0.12717	1.54948	0.281793	0.89659	0.243446	1.22409	0.21061	2.64234	0.661852	2.30576	0.690086	1.15906	0.304941
1319	CBL_Y371_Y371H	CBL	Y371	EQYELHCEMGS	1	0.609611	0.120913	0.490797	0.196671	0.497713	0.17847	0.820298	0.240279	1.02883	0.0439671	1.33043	0.100915	0.915065	0.1343	1.18005	0.258584	0.537535	0.0928411	0.817579	0.23947	0.681787	0.0533061	0.630464	0.184164	0.47628	0.0394362
1320	CBL_Y371_Y371H_YF	CBL	Y371	EQFELHCEMGS	0	0.528404	0.0367534	0.522515	0.215765	0.580146	0.235301	0.994866	0.234338	1.24765	0.100502	1.16886	0.0688861	0.57658	0.0445853	1.48516	0.338869	0.496435	0.12952	0.801537	0.195351	0.709986	0.100467	0.623369	0.28436	0.525969	0.0468794
1321	CBL_Y371_YF	CBL	Y371	EQFELYCEMGS	1	1.48901	0.143988	1.42572	0.443498	2.26548	0.542193	1.02435	0.253745	1.39135	0.111583	1.95034	0.386278	1.00306	0.0796054	1.67571	0.276919	1.26403	0.3258	1.5411	0.340148	3.34002	0.803087	2.66044	0.221233	1.58212	0.470351
1322	CBLC_Y402	CBLC	Y402	EAVSIYQFHGQ	1	7.05564	0.467567	5.92845	1.72563	3.08974	0.0991728	0.9691	0.178528	0.851755	0.104754	1.01445	0.247163	10.3922	1.29101	0.926225	0.177405	0.554267	0.17121	0.594054	0.187577	2.31134	0.295386	1.61844	0.36192	5.19262	0.847131
1323	CBLC_Y402_H405Y	CBLC	Y402	EAVSIYQFYGQ	2	7.01733	1.13116	9.16165	2.02518	7.50466	1.83459	4.79765	4.03901	1.21992	0.18996	2.11	0.728396	9.21638	0.974044	1.38292	0.147269	1.59965	0.610181	1.77212	0.801037	10.0537	0.608589	11.6477	3.40989	9.05327	1.99617
1324	CBLC_Y402_H405Y_YF	CBLC	Y402	EAVSIYQFFGQ	1	6.57678	1.54619	7.80254	2.26202	7.11606	2.29425	6.43562	5.77024	1.34144	0.17845	1.74061	0.186862	8.72156	1.03038	1.36465	0.16432	3.15052	1.12478	2.66642	1.6281	11.2282	1.1275	5.72736	1.74811	9.29056	0.778999
1325	CBR3_Y81	CBR3	Y81	FLRKEYGGLNV	1	0.334113	0.0597016	0.449554	0.127763	0.403772	0.130831	0.412308	0.0770574	0.614793	0.164794	0.584057	0.196822	0.374928	0.107483	0.618024	0.0455339	0.392829	0.0898632	0.436663	0.0863829	0.400355	0.142263	0.518707	0.23227	0.385037	0.0663281
1326	CBR3_Y81_L84V	CBR3	Y81	FLRKEYGGVNV	1	0.578063	0.197654	0.452396	0.122304	0.425477	0.141009	0.611991	0.0419743	0.597823	0.212384	0.643759	0.116406	0.474794	0.0803768	0.915868	0.371031	0.416166	0.0613253	0.494581	0.116137	0.390828	0.131461	0.399777	0.15786	0.471074	0.044749
1327	CBS_Y308	CBS	Y308	VEGIGYDFIPT	1	0.53868	0.0362065	0.594446	0.165112	0.785273	0.231778	0.722995	0.0976242	0.826524	0.189209	1.0378	0.0823976	0.429719	0.0536775	1.11847	0.468345	0.587519	0.192063	0.684915	0.264947	0.579451	0.0821942	0.575935	0.161563	0.50142	0.121666
1328	CBS_Y308_G305R	CBS	Y308	VERIGYDFIPT	1	0.434323	0.0398748	0.528781	0.240642	0.571167	0.138031	0.593067	0.0761754	0.61109	0.0731915	0.759205	0.0901624	0.416934	0.0416809	0.80088	0.131982	0.560047	0.10011	0.605113	0.206526	0.544041	0.164456	0.461367	0.230901	0.520824	0.0968305
1329	CBS_Y308_G307S	CBS	Y308	VEGISYDFIPT	1	0.596404	0.0550304	0.528702	0.221803	1.8951	0.497919	0.75359	0.153283	0.984366	0.180077	1.27927	0.139027	0.959786	0.139979	0.981614	0.182851	0.564247	0.129979	0.940827	0.209489	0.577928	0.17068	0.568114	0.12616	2.95869	0.322867
1330	CBX8_Y321	CBX8	Y321	SGGGLYRDMGA	1	0.373331	0.0222158	0.479719	0.0340203	0.428383	0.107137	0.502242	0.0905754	0.557239	0.0711439	0.564453	0.0852757	0.373148	0.0671182	0.617705	0.0864476	0.524198	0.257675	0.522472	0.060902	0.52987	0.12097	0.62378	0.173177	0.419909	0.0671525
1331	CBX8_Y321_G317V	CBX8	Y321	SVGGLYRDMGA	1	0.384795	0.0995184	0.40764	0.115621	0.480992	0.24448	0.555434	0.059965	0.733574	0.182639	0.69858	0.110905	0.446264	0.065705	0.790667	0.167175	0.54095	0.112324	0.560909	0.199456	0.566899	0.155179	0.43004	0.110878	0.483212	0.170221
1332	CC2D2A_Y381	CC2D2A	Y381	ELETLYKKAVK	1	0.322781	0.0358851	0.365935	0.15506	0.553883	0.172979	0.517363	0.191125	0.683784	0.147024	0.701686	0.157027	0.370034	0.101667	0.895668	0.188178	0.485192	0.104225	0.730647	0.28427	0.525871	0.27793	0.470085	0.334839	0.416051	0.149529
1333	CC2D2A_Y381_E376A	CC2D2A	Y381	ALETLYKKAVK	1	0.307155	0.0597638	0.34195	0.202262	0.395917	0.0791939	0.463283	0.0743244	0.602683	0.0854353	0.558702	0.111299	0.445804	0.0780021	0.864001	0.576109	0.405416	0.209064	0.474686	0.106852	0.348044	0.0871308	0.365968	0.216831	0.33815	0.0495588
1334	CC2D2A_Y683	CC2D2A	Y683	KKRSVYLKVLF	1	0.391309	0.0696119	0.446407	0.17369	0.401295	0.144908	0.706019	0.125758	0.897148	0.245397	1.01493	0.241662	0.477662	0.158648	1.19269	0.317237	0.494227	0.0516594	0.721373	0.158466	0.452875	0.108754	0.542524	0.168304	0.360547	0.0399776
1335	CC2D2A_Y683_L684I	CC2D2A	Y683	KKRSVYIKVLF	1	0.304248	0.057078	0.392304	0.0989794	0.363365	0.0831754	0.644146	0.254394	0.797859	0.31057	0.989858	0.522349	0.451137	0.222875	0.953678	0.184756	0.456615	0.0624071	0.515061	0.119265	0.41136	0.141031	0.395853	0.101715	0.335298	0.0456904
1336	CCBE1_Y70	CCBE1	Y70	ELTTCYRKKCC	1	0.379236	0.067586	0.444021	0.0774167	0.395506	0.0947175	0.559031	0.0468614	0.65216	0.0564438	0.817287	0.0724193	0.393418	0.047553	0.784681	0.0964674	0.485307	0.0770138	0.507395	0.113742	0.441045	0.100076	0.479741	0.167136	0.412969	0.0761105
1337	CCBE1_Y70_C75S	CCBE1	Y70	ELTTCYRKKCS	1	0.444425	0.0965826	0.453865	0.196794	0.457639	0.0459491	0.640112	0.165309	1.11652	0.472939	0.764479	0.140019	0.362248	0.0795528	0.816356	0.249334	0.536011	0.0804955	0.500781	0.0825828	0.43126	0.128682	0.564852	0.0338465	0.46673	0.0470506
1338	CCDC102B_Y299	CCDC102B	Y299	LWKWKYEELKE	1	0.269862	0.117811	0.630818	0.554713	0.513205	0.213997	0.725351	0.278467	1.08712	0.393228	1.27756	0.198272	0.712216	0.420488	1.72548	1.06932	0.573309	0.239985	1.2419	0.68727	0.919714	0.751316	0.492971	0.309642	0.335973	0.111158
1339	CCDC102B_Y299_K298R	CCDC102B	Y299	LWKWRYEELKE	1	0.715015	0.329748	0.628646	0.253155	0.561297	0.0577463	1.69905	1.09144	2.72734	0.637378	1.34382	0.714416	0.771044	0.341057	2.50258	1.61447	0.502507	0.24638	1.01908	0.830053	1.28076	0.540431	1.08895	0.705996	0.908782	0.332243
1340	CCDC116_Y291	CCDC116	Y291	LDLPGYCPLRE	1	0.772843	0.223562	0.960462	0.303026	1.10299	0.756296	1.27747	0.54997	1.64067	0.108289	1.54858	0.232613	1.09033	0.672316	1.96696	0.275798	0.916491	0.150486	1.35813	0.467317	1.08581	0.582027	0.667706	0.179742	0.767042	0.174261
1341	CCDC116_Y291_P293L	CCDC116	Y291	LDLPGYCLLRE	1	0.736094	0.325421	0.907551	0.382835	0.636402	0.210076	1.65191	0.519185	2.20562	0.412294	1.81844	0.198949	1.62577	0.832034	2.21253	0.533756	1.02975	0.254396	1.38967	0.662971	1.88203	2.05307	1.27779	0.3903	0.765366	0.219491
1342	CCDC137_Y125	CCDC137	Y125	ESDGAYIHRMQ	1	0.402645	0.028587	0.364669	0.1157	0.377657	0.125959	0.703442	0.154746	0.824478	0.194992	0.725992	0.1826	0.413936	0.0157884	0.872859	0.0356268	0.418856	0.146179	0.514264	0.156675	0.407828	0.0320417	0.493044	0.165009	0.405721	0.0665722
1343	CCDC137_Y125_H127Q	CCDC137	Y125	ESDGAYIQRMQ	1	0.456183	0.0834379	0.423212	0.111464	0.446299	0.162014	0.59938	0.12207	0.984864	0.444962	0.687146	0.0966974	0.416533	0.14268	0.772049	0.117549	0.385429	0.143493	0.539993	0.120544	0.473991	0.145061	0.4956	0.120231	0.430477	0.0914377
1344	CCDC151_Y542	CCDC151	Y542	GRLPEYNTRIA	1	0.408022	0.0282725	0.371958	0.0682826	0.416338	0.0712852	0.513384	0.0620952	0.549893	0.0552085	0.512162	0.143558	0.338586	0.0655339	0.588733	0.112582	0.403929	0.0731581	0.543407	0.296604	0.340641	0.120276	0.439936	0.15346	0.449666	0.0387873
1345	CCDC151_Y542_R545P	CCDC151	Y542	GRLPEYNTPIA	1	0.4629	0.204119	0.441628	0.0880731	0.32496	0.0513944	0.716164	0.15243	0.661736	0.0537075	0.704318	0.119291	0.31704	0.0494304	0.64329	0.148199	0.387715	0.151226	0.397203	0.0758778	0.515071	0.219485	0.431967	0.117393	0.407104	0.0483684
1346	CCDC170_Y323	CCDC170	Y323	TSQSQYFSFRE	1	4.89393	0.584188	3.07171	0.661502	1.71485	0.369121	0.604078	0.0960931	1.28711	0.524667	0.744836	0.401691	0.461065	0.250232	0.891058	0.140868	1.62181	0.757468	1.48944	0.770999	0.314814	0.0684857	0.368284	0.20792	0.817513	0.261233
1347	CCDC170_Y323_F324S	CCDC170	Y323	TSQSQYSSFRE	1	1.87953	0.78977	1.37105	0.760157	1.14174	0.83631	0.606643	0.0557611	0.686812	0.253042	0.603554	0.127045	0.523358	0.208875	0.626179	0.248906	0.630116	0.111615	0.530902	0.153543	0.510309	0.158978	0.769968	0.373705	0.569594	0.0598713
1348	CCDC178_Y422	CCDC178	Y422	AVNDFYAAKKT	1	0.429121	0.0773963	0.508402	0.110804	0.500118	0.267121	0.609895	0.0514998	0.547533	0.0834873	0.62941	0.152018	0.380755	0.146988	0.702578	0.200337	0.648346	0.324732	0.551001	0.150651	0.464346	0.132502	0.372297	0.075507	0.449271	0.081345
1349	CCDC178_Y422_D420N	CCDC178	Y422	AVNNFYAAKKT	1	0.463109	0.112064	0.372121	0.0671613	0.428004	0.025501	0.541744	0.111795	0.56596	0.169931	0.707916	0.362477	0.368978	0.0960119	0.58014	0.199885	0.520096	0.412794	0.401969	0.105782	0.372795	0.139267	0.352159	0.0930555	0.47543	0.0981359
1350	CCDC39_Y593	CCDC39	Y593	RKQQLYTAMEE	1	0.583053	0.256731	0.529308	0.342819	0.8554	0.269767	0.676777	0.291827	0.836304	0.275839	0.932841	0.193874	0.672001	0.268668	0.962509	0.4121	0.430874	0.128301	0.757099	0.300202	0.707326	0.0261491	0.533826	0.482827	2.02316	0.330811
1351	CCDC39_Y593_T594I	CCDC39	Y593	RKQQLYIAMEE	1	0.752528	0.193857	0.65474	0.146687	0.431301	0.0427295	0.72545	0.49482	0.699998	0.0842505	0.992574	0.341534	0.606943	0.291927	1.27889	0.387446	0.799592	0.49223	0.543308	0.214131	0.650845	0.252546	0.821537	0.502628	1.00029	0.296205
1352	CCDC42_Y149	CCDC42	Y149	AKLKDYYIFNK	2	0.807932	0.104124	0.514703	0.124619	0.502585	0.159143	0.65046	0.114983	0.605025	0.0566901	0.595643	0.258405	0.4569	0.0817916	0.635215	0.17875	3.39716	1.15378	2.1566	1.38981	0.449154	0.103797	0.593621	0.209542	0.703737	0.0960907
1353	CCDC42_Y149_A144T	CCDC42	Y149	TKLKDYYIFNK	2	1.3729	0.271187	0.579318	0.221474	0.752422	0.130131	0.735629	0.102614	1.48756	0.171594	1.0169	0.286238	0.537982	0.213078	0.910423	0.372383	4.91996	1.45017	3.15957	1.70181	0.811475	0.19008	0.690936	0.120422	1.27952	0.244992
1354	CCDC42_Y149_A144T_YF	CCDC42	Y149	TKLKDYFIFNK	1	0.575296	0.0987655	0.419033	0.112955	0.420474	0.145328	0.476063	0.089799	0.702262	0.114961	0.684823	0.123257	0.375717	0.0820823	0.765876	0.15975	1.05436	0.613632	0.870942	0.335489	0.520011	0.089919	0.353236	0.126047	0.40097	0.0789845
1355	CCDC42_Y149_YF	CCDC42	Y149	AKLKDYFIFNK	1	0.657888	0.0880438	0.464771	0.135594	0.47833	0.130894	0.434815	0.0268467	0.759043	0.0276019	0.820033	0.0367579	0.486809	0.078926	0.78284	0.174603	1.49	0.973767	1.00044	0.351389	0.416702	0.155278	0.512653	0.0457213	0.559684	0.1781
1356	CCDC60_Y41	CCDC60	Y41	MKSIKYMDKEI	1	0.447161	0.0718431	0.374502	0.110494	0.401926	0.0929557	0.457221	0.0881472	0.602759	0.312112	0.57828	0.0548404	0.514281	0.207328	0.568571	0.0616808	0.451783	0.126486	0.389328	0.0357687	0.398541	0.0170302	0.391898	0.027412	0.440329	0.108274
1357	CCDC60_Y41_I46V	CCDC60	Y41	MKSIKYMDKEV	1	0.375287	0.0416923	0.344011	0.0458242	0.398967	0.0659901	0.492417	0.178376	0.567068	0.118812	0.664395	0.243231	0.354781	0.0793142	0.554005	0.0715336	0.437207	0.0420285	0.54482	0.256578	0.32485	0.0652709	0.316303	0.0808716	0.334412	0.0505474
1358	CCDC70_Y125	CCDC70	Y125	TFWKKYRTFWK	1	0.663714	0.363109	0.460144	0.0799317	0.371211	0.316843	0.722676	0.216712	0.933841	0.376407	0.702165	0.315509	0.409372	0.283423	0.800329	0.305425	0.402519	0.139796	0.555089	0.139603	0.471671	0.185879	0.308433	0.126768	0.44585	0.0847205
1359	CCDC70_Y125_R126C	CCDC70	Y125	TFWKKYCTFWK	1	0.394521	0.0808675	0.381255	0.14918	0.380316	0.097432	0.751804	0.352129	0.84438	0.16204	0.966479	0.316973	0.364069	0.10684	0.794302	0.192663	0.438349	0.137698	0.619433	0.237524	0.381389	0.176291	0.425108	0.134674	0.401869	0.130129
1360	CCDC82_Y331	CCDC82	Y331	KQNSLYSFSDH	1	3.96789	0.294143	5.24243	0.948594	3.24635	0.380726	0.690894	0.128282	0.85272	0.0014928	1.00185	0.168514	3.94876	0.987204	0.906516	0.0801103	0.489097	0.1544	0.536114	0.114209	0.852983	0.136567	0.651153	0.0530787	9.08133	1.28024
1361	CCDC82_Y331_Q327R	CCDC82	Y331	KRNSLYSFSDH	1	1.32917	0.451208	1.53575	0.237752	0.964042	0.285852	0.568698	0.152471	0.416437	0.0157596	0.531458	0.0873804	0.82911	0.318254	0.549982	0.11464	0.410951	0.0579804	0.47098	0.111009	0.458007	0.0969239	0.378831	0.0817126	4.12407	1.01745
1362	CCDC88B_Y1277	CCDC88B	Y1277	REQREYLDQLN	1	0.520802	0.120304	0.624068	0.241609	0.604296	0.375885	2.2141	3.21662	0.578346	0.237279	0.916932	0.585091	0.531783	0.0820641	0.984446	0.228151	0.693323	0.28091	0.659705	0.232829	0.665686	0.233611	0.663043	0.329277	0.432743	0.110296
1363	CCDC88B_Y1277_D1279E	CCDC88B	Y1277	REQREYLEQLN	1	0.529397	0.106955	0.531461	0.258614	0.7063	0.192527	0.786321	0.460476	1.15031	0.398177	1.18277	0.174987	0.522994	0.0776968	0.939064	0.264426	0.611004	0.195848	0.755156	0.137358	0.539605	0.297013	0.558547	0.163369	0.580433	0.0923994
1364	CCDC93_Y176	CCDC93	Y176	DLSEVYKPRRK	1	0.572631	0.134763	0.579444	0.100751	0.407353	0.116357	0.590001	0.232337	0.574371	0.020191	0.760924	0.25571	0.520533	0.339608	0.622984	0.176648	0.351655	0.203863	0.575326	0.223686	0.512817	0.408712	0.45416	0.320282	0.634203	0.154196
1365	CCDC93_Y176_R179C	CCDC93	Y176	DLSEVYKPCRK	1	0.405302	0.0553772	0.450836	0.144835	0.50597	0.189094	0.728588	0.368518	0.829121	0.0489222	0.846892	0.130564	0.453062	0.100483	0.934762	0.173253	0.530342	0.161693	0.668313	0.153307	0.483253	0.0874906	0.531553	0.287402	0.419412	0.0725047
1366	CCDC93_Y209	CCDC93	Y209	EYGRRYGFSRQ	2	0.419105	0.0304589	0.423803	0.125111	0.437653	0.0407551	0.525205	0.135277	0.475457	0.107535	0.576712	0.073913	0.308644	0.0606865	0.645993	0.207792	0.388777	0.062883	0.588124	0.303345	0.410167	0.114142	0.393158	0.124271	0.533971	0.163017
1367	CCDC93_Y209_R213C	CCDC93	Y209	EYGRRYGFSCQ	2	0.483263	0.0643151	0.530078	0.092936	0.617368	0.101934	0.880541	0.196405	1.19959	0.560199	0.931006	0.203946	0.526264	0.0779264	1.11654	0.121051	0.525871	0.140924	0.695745	0.248342	0.590016	0.125408	0.593865	0.101117	0.476135	0.0630112
1368	CCDC93_Y209_R213C_YF	CCDC93	Y209	EFGRRYGFSCQ	1	0.468377	0.125556	0.546839	0.175111	0.418128	0.186465	0.732756	0.234802	0.910539	0.492037	0.914419	0.244307	0.534413	0.134149	0.988822	0.20124	0.629103	0.299795	0.619525	0.142541	0.539099	0.0673303	0.504026	0.11801	0.491429	0.0517612
1369	CCDC93_Y209_YF	CCDC93	Y209	EFGRRYGFSRQ	1	0.491604	0.0267748	0.448989	0.0524663	0.422465	0.0809625	1.42389	0.934004	0.60673	0.154659	0.621192	0.25815	0.337666	0.0895849	0.633825	0.13259	0.430467	0.111644	0.432365	0.0808716	0.427047	0.0895345	0.416467	0.162438	0.498697	0.0815916
1370	CCNB1IP1_Y125	CCNB1IP1	Y125	QMEKIYTQQIQ	1	1.54662	0.445152	0.662902	0.124905	0.62848	0.246845	1.03441	0.324974	1.07145	0.137101	1.12449	0.438991	0.651435	0.375358	1.06197	0.278322	0.673149	0.438721	0.499579	0.343777	0.746811	0.438549	0.465996	0.155575	1.19128	0.38499
1371	CCNB1IP1_Y125_Y125C	CCNB1IP1	Y125	QMEKICTQQIQ	0	0.573324	0.0584565	0.486266	0.152494	0.408566	0.247328	0.986384	0.434092	1.23758	0.363991	1.36305	0.266221	0.537056	0.337687	1.64121	0.707984	1.00138	1.28846	0.947626	0.515437	0.707083	0.16288	0.646618	0.278589	0.461428	0.17499
1372	CCPG1_Y569	CCPG1	Y569	TVFSDYLHPQY	2	0.498494	0.0942047	0.43033	0.120971	0.457084	0.105229	0.784713	0.41352	1.36468	0.441625	2.33594	0.968072	0.398053	0.0481676	0.943881	0.26325	0.69868	0.245132	0.723199	0.15903	0.727198	0.148756	0.504578	0.0176826	0.417222	0.129718
1373	CCPG1_Y569_F566S	CCPG1	Y569	TVSSDYLHPQY	2	0.355073	0.0387966	0.364598	0.0631425	0.407364	0.139138	0.52099	0.139414	0.536198	0.0790639	1.28532	0.759309	0.44223	0.0691734	0.681242	0.0818485	0.527718	0.0635509	0.539631	0.190357	0.429547	0.225652	0.531112	0.156558	0.315358	0.0388671
1374	CCPG1_Y569_F566S_YF	CCPG1	Y569	TVSSDYLHPQF	1	0.456731	0.0571328	0.40361	0.0717421	0.444056	0.129634	0.877462	0.121523	0.779048	0.102096	1.80034	0.729183	0.49496	0.0842835	0.926506	0.18865	0.514254	0.100357	0.752836	0.29653	0.823199	0.450241	0.537887	0.161811	0.411304	0.0474776
1375	CCPG1_Y569_YF	CCPG1	Y569	TVFSDYLHPQF	1	1.07479	0.492615	0.690082	0.684061	0.643038	0.531198	1.53355	0.720117	1.82983	1.00712	4.45236	4.6543	0.429803	0.350319	1.21683	0.860512	1.03371	0.335668	0.938423	0.610318	1.01613	0.596498	0.573153	0.444409	0.80513	0.475721
1376	CCR5_Y297	CCR5	Y297	INPIIYAFVGE	1	4.83947	0.620511	6.12604	1.50267	6.18994	1.53968	10.4444	4.46131	1.02948	0.172258	1.17334	0.13162	6.77217	0.579804	2.01745	0.527516	3.47688	0.850176	2.74583	0.805298	10.7385	1.24358	9.51111	2.92507	7.72183	0.558799
1377	CCR5_Y297_E302G	CCR5	Y297	INPIIYAFVGG	1	5.05254	0.601104	6.25607	1.41219	6.34996	2.06299	14.4182	4.55181	1.55092	0.331425	1.13686	0.0894924	6.66149	0.78575	2.09451	0.265594	4.39064	1.28126	3.51251	1.69028	11.476	2.5235	9.68124	3.00469	8.4232	1.55322
1378	CCR5_Y297_G301V	CCR5	Y297	INPIIYAFVVE	1	2.58692	0.294567	2.42125	0.246831	1.78033	0.241435	2.37024	1.18484	1.19564	0.0841245	1.24869	0.131684	2.65983	0.517915	1.50075	0.236706	1.00286	0.178919	1.28563	0.102585	4.53353	0.970991	3.8236	1.02193	4.13101	0.252766
1379	CCR5_Y339	CCR5	Y339	RASSVYTRSTG	1	0.875384	0.177179	0.608396	0.209607	0.741492	0.191602	0.721059	0.126863	0.654633	0.0584549	0.650913	0.383907	0.552431	0.343794	1.50425	2.34355	0.480274	0.154417	0.469675	0.20164	0.591274	0.0884178	0.55209	0.274073	1.20651	0.46108
1380	CCR5_Y339_A335V	CCR5	Y339	RVSSVYTRSTG	1	0.853175	0.152768	1.09625	0.278723	1.13419	0.783214	0.873129	0.676175	1.01626	0.280076	1.18396	0.563682	0.984014	0.661545	1.22083	0.273738	0.935902	0.415615	0.944941	0.680691	0.945465	0.491201	0.866919	0.509754	0.665105	0.196142
1381	CCR5_Y339_Y339F	CCR5	Y339	RASSVFTRSTG	0	0.820511	0.243445	0.868265	0.317319	0.578563	0.24865	0.860554	0.261348	0.765561	0.0887589	0.729669	0.282841	0.736154	0.516041	0.732354	0.204359	0.589474	0.119874	0.797109	0.231254	0.618637	0.268672	0.468176	0.12952	0.623764	0.261648
1382	CCRL2_Y170	CCRL2	Y170	PEFVVYKPQME	1	0.782716	0.0909566	0.814338	0.215063	0.882999	0.273819	1.42155	0.754134	1.82011	0.540519	1.69906	0.295886	0.898252	0.227863	1.82279	0.448117	0.672862	0.216925	1.0831	0.532367	1.12023	0.55557	0.842809	0.317559	0.972291	0.560275
1383	CCRL2_Y170_F167Y	CCRL2	Y170	PEYVVYKPQME	2	9.4045	2.11225	9.13487	2.09666	6.68761	1.49435	9.50258	4.66646	5.75377	2.57406	6.34453	3.1847	1.09363	0.211864	1.29017	0.232719	8.30126	1.05123	6.08086	2.4874	2.97449	0.494682	7.27877	1.51853	1.13704	0.186993
1384	CCRL2_Y170_V168M	CCRL2	Y170	PEFMVYKPQME	1	0.884013	0.544215	0.494001	0.134921	0.661416	0.135887	0.68468	0.223068	0.89784	0.0859487	1.03495	0.53062	0.47627	0.178005	1.0631	0.24339	0.591929	0.41558	0.867391	0.569933	0.665173	0.157359	0.624162	0.230619	0.464295	0.193513
1385	CCT6A_Y229	CCT6A	Y229	RVEDAYILTCN	1	1.0035	0.214523	0.838578	0.28298	0.69223	0.226508	0.564733	0.213637	0.772326	0.0268919	1.06915	0.282577	4.92852	8.95673	0.927714	0.296052	0.720611	0.416679	0.689494	0.206814	0.515291	0.135209	0.486623	0.238835	0.49825	0.195861
1386	CCT6A_Y229_Y229C	CCT6A	Y229	RVEDACILTCN	0	0.72722	0.456361	0.550649	0.0887169	0.751012	0.524414	0.860495	0.271125	1.18446	0.198974	0.99437	0.387302	0.570831	0.164721	1.12368	0.355393	0.708167	0.193925	0.968061	0.259309	0.621639	0.142787	0.688396	0.200546	0.682884	0.137837
1387	CCT6B_Y250	CCT6B	Y250	NSGFFYKTAEE	1	0.47605	0.0890102	0.461915	0.0564482	0.44464	0.174539	0.888241	0.170486	1.43776	0.23332	1.31022	0.175631	0.48584	0.113639	1.40629	0.192919	0.555579	0.161841	0.73961	0.201563	0.654723	0.173635	0.721638	0.224415	0.43506	0.160398
1388	CCT6B_Y250_G247A	CCT6B	Y250	NSAFFYKTAEE	1	0.379727	0.0128317	0.523822	0.311498	0.495872	0.274876	0.59271	0.225929	0.92688	0.130973	0.961617	0.225341	0.469692	0.0872498	1.22743	0.324839	0.45197	0.160714	0.69589	0.144128	0.521252	0.249018	0.47211	0.261912	0.438732	0.111663
1389	CCT7_Y263	CCT7	Y263	HTVEDYQAIVD	1	0.835718	0.321267	0.773123	0.191273	0.794176	0.207246	1.67489	0.284778	1.67442	0.137711	1.73127	0.550913	0.849817	0.190641	2.21003	0.768012	0.817672	0.168625	1.06211	0.517509	0.882084	0.253475	0.936225	0.414447	0.733838	0.187977
1390	CCT7_Y263_T259A	CCT7	Y263	HAVEDYQAIVD	1	0.942377	0.36909	0.79175	0.325698	0.713516	0.168	1.19021	0.264006	1.24827	0.507298	1.54355	0.561701	0.652747	0.313804	1.47291	0.28479	0.863586	0.260635	1.05287	0.452912	0.729718	0.251108	1.03496	0.454072	3.11954	5.01268
1391	CD19_Y378	CD19	Y378	GTAPSYGNPSS	1	0.496244	0.197994	0.35822	0.127344	0.33621	0.023559	0.589497	0.246347	0.593675	0.0579196	0.51692	0.158308	0.29905	0.047081	0.559861	0.0387445	0.379732	0.118468	0.49385	0.124893	0.406534	0.150105	0.361508	0.0560088	0.431789	0.0953391
1392	CD19_Y378_G373S	CD19	Y378	STAPSYGNPSS	1	0.380616	0.0856775	0.383032	0.0270607	0.339759	0.069892	0.481509	0.0505291	0.50305	0.0346522	0.544945	0.143196	0.320109	0.0711521	0.504622	0.151981	0.360797	0.0809883	0.357702	0.064463	0.328273	0.0903581	0.357016	0.0609481	0.401926	0.0567435
1393	CD200R1L_Y138	CD200R1L	Y138	NFHRGYHLQVL	1	0.352629	0.0266595	0.499957	0.181433	0.374822	0.137082	0.786652	0.500815	0.540104	0.101027	0.754593	0.131029	0.477744	0.0948085	0.834935	0.258708	0.453181	0.204544	0.605716	0.218367	0.482795	0.213719	0.474538	0.153199	0.350865	0.0145947
1394	CD200R1L_Y138_H135R	CD200R1L	Y138	NFRRGYHLQVL	1	0.380382	0.0594325	0.415801	0.100612	0.386381	0.115584	0.485978	0.116939	0.528324	0.0911719	0.621434	0.0806227	0.439388	0.0848109	0.699187	0.134841	0.461713	0.068217	0.527774	0.144181	0.378635	0.0875007	0.472641	0.109208	0.394089	0.121075
1395	CD207_Y217	CD207	Y217	IPKTWYSAEQF	1	0.615183	0.034163	0.522291	0.14203	0.542221	0.168143	0.526132	0.0594992	0.680581	0.184495	0.854577	0.100607	0.447512	0.0727741	0.93937	0.223338	0.493771	0.141928	0.538488	0.081495	3.1861	1.09221	3.03999	1.29738	9.15659	2.00639
1396	CD207_Y217_P213S	CD207	Y217	ISKTWYSAEQF	1	0.521645	0.073805	0.531746	0.146937	0.48135	0.167791	0.58466	0.139603	0.603967	0.0646852	0.793106	0.291215	0.520612	0.0640147	0.836679	0.199897	0.604706	0.21806	0.757216	0.200996	1.84039	0.168071	1.79921	0.557634	7.68071	0.590117
1397	CD209_Y239	CD209	Y239	KQQEIYQELTQ	1	5.58709	1.0984	6.33338	1.15157	6.42776	1.44193	1.77263	1.22682	0.917263	0.102319	1.3543	0.243575	3.56049	0.515384	1.07439	0.105446	3.09784	1.07677	2.30019	1.49593	5.80516	0.386808	3.02592	0.817678	4.80951	0.65566
1398	CD209_Y239_L242V	CD209	Y239	KQQEIYQEVTQ	1	5.15166	0.852501	5.16893	1.21198	5.41092	1.75047	1.93468	1.49112	0.765436	0.0539097	1.25818	0.119084	7.32379	0.600901	0.941717	0.0717209	2.5586	1.04765	1.95685	1.30012	7.19759	2.07823	4.49452	1.42314	4.05608	0.235987
1399	CD3D_Y149	CD3D	Y149	RNDQVYQPLRD	1	4.45433	0.735453	5.01103	1.73841	10.8726	3.22418	0.72775	0.370164	0.673134	0.253341	0.875481	0.477165	0.574841	0.18072	0.700219	0.211538	1.1663	0.538352	0.926515	0.571023	1.26426	0.977825	1.18055	1.04261	1.25762	0.058312
1400	CD3D_Y149_Q147R	CD3D	Y149	RNDRVYQPLRD	1	1.55031	0.363653	0.674752	0.0545369	5.18087	2.48625	0.689308	0.310557	0.508663	0.0924737	0.603871	0.100599	0.474667	0.131668	0.785218	0.446097	0.40978	0.194922	0.616183	0.500963	0.629386	0.625675	0.431822	0.257508	0.785845	0.334005
1401	CD3E_Y199	CD3E	Y199	GQRDLYSGLNQ	1	6.8804	0.42247	6.14249	1.86308	12.4486	8.09085	1.06525	0.898454	0.593664	0.058035	1.11008	0.410464	4.76509	1.37191	0.748907	0.143545	0.448983	0.16393	0.582897	0.263768	2.25189	0.865637	2.34777	1.26417	5.19564	1.59276
1402	CD3E_Y199_Q204E	CD3E	Y199	GQRDLYSGLNE	1	5.28376	0.435851	4.39765	0.958736	9.08415	4.2595	0.565836	0.213638	0.716247	0.11922	1.2308	0.564155	1.9364	0.544744	0.890429	0.129187	0.555214	0.312546	0.652862	0.14696	1.12252	0.347174	1.29838	0.336486	2.58324	0.900583
1403	CD44_Y412	CD44	Y412	RWHEGYRQTPK	1	0.361436	0.101861	0.417919	0.181912	0.429159	0.079898	0.41804	0.14022	0.606517	0.231413	0.659802	0.277381	0.367014	0.17005	0.678314	0.0880072	0.404852	0.172783	0.595335	0.395673	0.407245	0.075042	0.589131	0.24425	0.355885	0.141267
1404	CD44_Y412_K417R	CD44	Y412	RWHEGYRQTPR	1	0.349553	0.0630902	0.299158	0.157971	0.344849	0.0869768	0.64996	0.171862	0.538733	0.0584276	0.644976	0.194408	0.613339	0.318364	0.850691	0.311114	0.433046	0.0873722	0.663189	0.311749	0.461138	0.0723363	0.383449	0.168501	0.539097	0.344886
1405	CD5_Y465	CD5	Y465	SHLSAYPALEG	1	0.342534	0.0530436	0.37515	0.0511249	0.371855	0.0916192	0.531093	0.0602393	0.483183	0.130357	0.611354	0.100378	0.409377	0.0815236	0.591127	0.136972	0.404236	0.0462539	0.411425	0.0929133	0.351385	0.093815	0.397508	0.162559	0.323998	0.0540954
1406	CD5_Y465_H461R	CD5	Y465	SRLSAYPALEG	1	0.533089	0.197826	0.425284	0.117954	0.435875	0.116995	0.471245	0.0979116	0.673851	0.0581601	0.72348	0.174253	0.391076	0.116563	0.803036	0.154898	0.48639	0.0666615	0.468659	0.10632	0.348197	0.13146	0.49485	0.091869	0.496427	0.0933235
1407	CD5_Y465_Y465F	CD5	Y465	SHLSAFPALEG	0	0.327634	0.0436728	0.352005	0.0896059	0.402071	0.109144	0.40661	0.0512846	0.500283	0.0554552	0.553489	0.117809	0.311921	0.125559	0.61238	0.123175	0.354464	0.0791656	0.520104	0.160342	0.430719	0.209963	0.366826	0.156624	0.347486	0.0542331
1408	CD55_Y245	CD55	Y245	RDHYGYRQSVT	2	0.822	0.136276	0.86645	0.227864	0.806236	0.397707	0.794015	0.196806	0.455224	0.0992606	1.2187	1.13694	0.748217	0.18495	0.794037	0.318623	0.746735	0.251234	0.338957	0.0633425	0.882719	0.493123	0.472416	0.11563	0.773753	0.160646
1409	CD55_Y245_R240H	CD55	Y245	HDHYGYRQSVT	2	0.537506	0.129167	0.940063	0.275777	0.969196	0.668629	0.622285	0.182194	1.05976	0.630579	0.800883	0.322375	0.74308	0.155198	1.0615	0.226836	0.694915	0.253835	0.623024	0.216455	0.399962	0.205522	0.71302	0.187802	0.883482	0.180502
1410	CD55_Y245_R240H_YF	CD55	Y245	HDHFGYRQSVT	1	0.725294	0.590641	0.444454	0.194015	0.509696	0.327625	0.659416	0.346651	0.535967	0.236156	0.733205	0.510199	0.48219	0.180942	0.896146	0.464202	0.478823	0.157681	0.527562	0.177093	0.650481	0.189899	0.434161	0.149587	0.346306	0.115868
1411	CD55_Y245_YF	CD55	Y245	RDHFGYRQSVT	1	0.626097	0.464221	0.435462	0.245569	0.488555	0.160898	0.537914	0.131649	0.572488	0.256059	0.722371	0.152073	0.426915	0.105036	0.702341	0.237073	0.471087	0.131401	0.79126	0.183438	0.602686	0.365669	0.330326	0.184396	0.474303	0.150344
1412	CD55_Y266	CD55	Y266	GEHSIYCTVNN	1	4.65589	0.670351	5.27726	0.908657	5.60481	1.43133	1.97769	0.866702	1.2224	0.0989317	1.5553	0.157212	5.02797	0.130142	1.73441	0.283118	0.954747	0.1472	1.06716	0.402942	6.55846	1.14104	5.38881	1.74389	2.07909	0.352258
1413	CD55_Y266_C267S	CD55	Y266	GEHSIYSTVNN	1	7.42316	1.14513	10.2907	4.01649	10.8908	6.5553	6.91977	3.64425	0.535541	0.163297	0.792047	0.109121	14.5099	1.87838	1.50434	0.561991	0.583727	0.131396	0.520323	0.0851604	9.99339	3.39798	12.9545	4.89424	7.23157	1.06694
1414	CD59_Y86	CD59	Y86	ENELTYYCCKK	2	2.74051	0.28883	1.72194	0.462575	2.47418	0.212316	1.26514	0.319493	1.77043	0.445562	1.57432	0.547958	0.778604	0.0855398	0.954758	0.22128	2.20973	0.295798	1.21646	0.515655	0.505118	0.11959	0.970056	0.431419	1.08353	0.211635
1415	CD59_Y86_C89Y	CD59	Y86	ENELTYYCYKK	3	5.18164	0.954259	4.73886	1.18823	4.7912	1.43962	6.1808	1.38622	2.24679	0.188317	1.91859	0.466101	0.685237	0.175794	1.68602	0.385604	1.67463	0.804419	1.52807	0.265879	0.793585	0.0688933	0.751796	0.052411	1.35953	0.375303
1416	CD59_Y86_C89Y_YF	CD59	Y86	ENELTYFCFKK	1	4.58495	0.726029	4.33129	0.505978	3.63184	0.570103	3.3756	1.33781	2.4292	0.879468	1.71308	0.172825	0.541005	0.0538479	1.57024	0.241351	1.05594	0.184204	1.28757	0.140343	0.796134	0.349101	0.666575	0.241924	1.16408	0.202539
1417	CD59_Y86_YF	CD59	Y86	ENELTYFCCKK	1	2.2114	0.427727	1.08425	0.109494	1.17992	0.0922769	0.737305	0.0363715	2.6529	0.376842	1.3233	0.13264	0.47757	0.129101	1.04206	0.277028	0.866662	0.195639	0.711305	0.0777175	0.464886	0.100838	0.543466	0.228433	0.703001	0.106379
1418	CD59_Y87	CD59	Y87	NELTYYCCKKD	2	3.90623	0.393931	2.92518	0.307278	3.03532	0.36774	1.4845	0.532898	2.8245	0.986926	1.89809	0.508739	3.67306	1.20027	1.30233	0.416012	7.15101	1.23352	3.91466	1.58786	0.923252	0.232439	1.16646	0.292143	4.45136	0.622335
1419	CD59_Y87_C89Y	CD59	Y87	NELTYYCYKKD	3	4.48126	0.636262	3.83689	0.984682	4.172	0.873351	5.44599	1.43228	1.99497	0.259403	1.81	0.169282	0.69178	0.0903492	1.5075	0.0482214	2.09454	0.293503	1.98346	0.163845	0.803882	0.24379	0.825697	0.287429	1.77078	0.346919
1420	CD59_Y87_C89Y_YF	CD59	Y87	NELTFYCFKKD	1	0.349601	0.072826	0.412357	0.20231	0.448429	0.197053	0.757604	0.337028	1.11801	0.110493	0.960453	0.135216	0.590757	0.247546	1.22049	0.173372	0.455564	0.0629913	0.614353	0.144665	0.540969	0.190644	0.492059	0.145162	0.381445	0.087989
1421	CD59_Y87_YF	CD59	Y87	NELTFYCCKKD	1	0.436273	0.0578539	0.451937	0.146215	0.459634	0.127121	0.80825	0.214503	1.29384	0.264542	1.39224	0.400535	0.460573	0.0793701	1.27903	0.21799	0.540027	0.151346	0.715183	0.152926	0.514194	0.10846	0.738609	0.2257	0.465636	0.0464435
1422	CDA_Y79	CDA	Y79	AVSEGYKDFRA	1	0.337595	0.0514236	0.441415	0.165861	0.451754	0.0448834	0.602027	0.074956	0.553451	0.164747	0.601689	0.179669	0.340535	0.0817252	0.68937	0.170857	0.51938	0.0271645	0.541635	0.103751	0.386123	0.0918097	0.455801	0.176744	0.44865	0.0557878
1423	CDA_Y79_V75I	CDA	Y79	AISEGYKDFRA	1	0.498697	0.10794	0.322861	0.142288	0.405451	0.0633211	0.621589	0.26519	0.617221	0.151998	0.617284	0.214606	0.31343	0.12559	0.638124	0.137902	0.424732	0.083938	0.523893	0.0924868	0.352918	0.142917	0.414791	0.131346	0.382405	0.0649923
1424	CDAN1_Y712	CDAN1	Y712	VPLLEYYRDIF	2	0.55294	0.103399	0.443535	0.157557	0.507603	0.189533	0.728046	0.138563	2.63658	0.588494	0.997567	0.294358	0.543515	0.158773	1.23972	0.200399	3.62771	0.684642	2.82789	1.24417	0.56384	0.0728499	0.646921	0.126473	0.441248	0.0792197
1425	CDAN1_Y712_R714W	CDAN1	Y712	VPLLEYYWDIF	2	1.66642	0.196991	0.879339	0.175318	0.813251	0.119151	0.923002	0.248757	2.12509	0.15047	1.43168	0.527109	0.521143	0.258524	1.45638	0.341132	7.97099	3.24053	6.86549	3.2764	2.26888	0.649681	1.54423	0.44399	1.54481	0.374149
1426	CDAN1_Y712_R714W_YF	CDAN1	Y712	VPLLEYFWDIF	1	0.410587	0.0477592	0.448524	0.183736	0.43224	0.134313	0.665867	0.259457	1.12258	0.227533	1.01633	0.227651	0.438862	0.132131	1.15952	0.244418	3.60652	1.00399	2.73243	1.01378	0.455139	0.0673479	0.468907	0.0886765	0.412647	0.0918961
1427	CDAN1_Y712_YF	CDAN1	Y712	VPLLEYFRDIF	1	0.519814	0.184779	0.543163	0.261761	0.566159	0.20584	1.06104	0.308647	1.40586	0.0777086	1.41712	0.334685	0.583818	0.114563	1.60007	0.385874	0.686643	0.207917	0.942999	0.100421	0.522602	0.236866	0.71483	0.198565	0.560385	0.12112
1428	CDAN1_Y713	CDAN1	Y713	PLLEYYRDIFT	2	0.788847	0.166535	0.703991	0.433	0.84634	0.411966	1.45063	0.503629	4.74434	0.664874	1.69583	0.393969	1.02538	0.351156	1.8056	0.422618	6.73035	2.56917	5.57557	2.30241	1.37926	0.704271	1.24631	0.507736	0.782232	0.271837
1429	CDAN1_Y713_R714W	CDAN1	Y713	PLLEYYWDIFT	2	1.18672	0.0953142	1.31589	0.467849	0.790137	0.410562	1.61194	0.80408	2.647	0.927262	2.63683	1.36844	0.9059	0.551614	2.26895	0.676175	8.76383	1.64464	7.05578	1.35848	2.64054	1.19064	1.27776	0.221235	1.02281	0.346044
1430	CDAN1_Y713_R714W_YF	CDAN1	Y713	PLLEFYWDIFT	1	0.412258	0.0930886	0.448413	0.293524	0.458004	0.320413	0.827552	0.37494	1.17413	0.406793	0.970664	0.201524	0.527342	0.332676	1.19697	0.277867	0.428354	0.276607	0.939757	0.611589	0.832503	0.467552	0.644549	0.249197	0.284328	0.163073
1431	CDAN1_Y713_YF	CDAN1	Y713	PLLEFYRDIFT	1	0.81559	0.116725	0.669464	0.441588	0.625629	0.248147	1.18203	0.50208	2.00068	0.414248	1.85242	0.723039	0.732118	0.262457	2.19641	0.929704	0.822303	0.180092	1.32985	0.617025	0.950383	0.459208	0.873533	0.383504	0.809961	0.213116
1432	CDC14A_Y591	CDC14A	Y591	SLQSEYVHYGG	2	0.84764	0.291221	0.690226	0.220993	0.926721	0.326626	0.600279	0.144264	0.655348	0.203257	0.918949	0.258201	0.440739	0.057803	0.774496	0.230331	0.81113	0.218159	0.949533	0.363465	0.854342	0.0969846	0.973272	0.358995	0.558153	0.0766018
1433	CDC14A_Y591_S589F	CDC14A	Y591	SLQFEYVHYGG	2	0.464621	0.0957516	0.516137	0.252867	0.551334	0.23441	0.404601	0.0780008	0.7663	0.157078	1.05846	0.394397	0.481189	0.0577914	0.903971	0.313072	0.796565	0.130565	0.742231	0.170075	0.555693	0.269603	0.627844	0.352108	0.347813	0.0717232
1434	CDC14A_Y591_S589F_YF	CDC14A	Y591	SLQFEYVHFGG	1	0.604112	0.10185	0.548496	0.309016	0.556978	0.272529	0.780861	0.122479	1.11891	0.04173	1.2541	0.170946	0.367153	0.0542103	1.29031	0.198836	1.46975	0.836705	1.33238	0.401078	0.612155	0.314907	0.681658	0.247138	0.426184	0.170555
1435	CDC14A_Y591_YF	CDC14A	Y591	SLQSEYVHFGG	1	0.8889	0.209545	0.782509	0.286473	0.596004	0.177067	0.733643	0.0367734	0.874692	0.0614222	1.24282	0.297423	0.442037	0.0431832	0.962983	0.297312	1.35729	0.570385	0.9722	0.351853	1.09285	0.186408	0.746154	0.0946725	0.509068	0.132348
1436	CDC14C_Y132	CDC14C	Y132	FGDTPYIPFRD	1	0.781377	0.109731	0.549555	0.116745	0.540481	0.164773	0.589366	0.141292	0.646271	0.102096	0.764457	0.103824	0.541742	0.260189	0.904713	0.137425	0.521505	0.148433	0.662146	0.197098	0.494906	0.200423	0.457619	0.187667	0.444947	0.0964167
1437	CDC14C_Y132_P131S	CDC14C	Y132	FGDTSYIPFRD	1	0.517841	0.116351	0.443491	0.114024	0.442761	0.106707	0.545879	0.121203	0.676146	0.155108	0.658593	0.132141	0.39141	0.049688	0.671864	0.168464	0.517048	0.148546	0.496093	0.0600979	0.424142	0.0861047	0.532638	0.083386	0.452389	0.0668641
1438	CDC42_Y64	CDC42	Y64	AGQEDYDRLRP	1	0.45179	0.0773555	0.545857	0.198513	0.785155	0.457685	0.688795	0.144503	0.839302	0.0553076	1.12792	0.147548	0.508426	0.0781925	1.07059	0.123503	0.576091	0.093154	0.689989	0.212244	0.59785	0.182384	0.6539	0.203542	0.471048	0.0916407
1439	CDC42_Y64_Y64C	CDC42	Y64	AGQEDCDRLRP	0	0.427254	0.115319	0.435589	0.114917	0.423744	0.140562	0.609041	0.162909	0.681674	0.08054	0.783706	0.109623	0.439135	0.0876778	0.881859	0.109169	0.476329	0.24402	0.585665	0.134006	0.55234	0.197512	0.44397	0.140288	0.363758	0.0459461
1440	CDC42BPB_Y1638	CDC42BPB	Y1638	SRNKPYISWPS	1	0.482964	0.0676166	0.435615	0.162888	0.484539	0.188363	0.476875	0.0633809	0.976754	0.663415	0.582736	0.176186	0.345393	0.0451289	0.611844	0.107694	0.468695	0.119292	0.510678	0.0746327	0.416566	0.191621	0.394987	0.0968398	0.441477	0.0627546
1441	CDC42BPB_Y1638_S1633Y	CDC42BPB	Y1638	YRNKPYISWPS	2	0.522475	0.063805	0.409906	0.0353729	0.605987	0.416118	0.400537	0.0706997	0.696689	0.176201	0.54732	0.0839238	0.393618	0.0725391	0.635185	0.130815	0.393636	0.0750466	0.460243	0.119052	0.450068	0.123366	0.461148	0.106526	0.448741	0.0718633
1442	CDC42BPB_Y1638_S1633Y_YF	CDC42BPB	Y1638	FRNKPYISWPS	1	0.444601	0.201441	0.34524	0.086978	0.414387	0.198022	0.36045	0.0217898	0.423655	0.0397795	0.456776	0.114179	0.365805	0.0851668	0.551695	0.130793	0.407582	0.102418	0.426773	0.0525593	0.255101	0.0433679	0.329988	0.0537974	0.416934	0.0642634
[truncated: 8,456 more rows]

## Sheet: c-Src
variant name	variant seq	reference name	reference seq	ref. AA	pos.	var. AA	var. enrich. R1	var. enrich. R2	var. enrich. R3	var. enrich. R4	var. mean	var. stdev	ref. enrich. R1	ref. enrich. R2	ref. enrich. R3	ref. enrich. R4	ref. mean	ref. stdev	mean of log2(variant)	mean of log2(reference)	difference	SE of difference	p-value	q-value	hit?
[truncated: 5,554 more rows]

[truncated: 15 more sheets: Fyn, Hck, c-Abl, Jak2, AncSZ, Fer, Fes, FGFR1, FGFR3, EPHB1, EPHB2, MERTK, Src substrates, Abl substrates, Fyn substrates]
