# Supplementary material for: High-throughput profiling of sequence recognition by tyrosine kinases and SH2 domains using bacterial peptide display
Source: bioRxiv preprint, doi:10.1101/2022.08.01.502334, version 3 (2023-01-31)
Supplement: Figure 6-source data 2 [file 502334_file09.xlsx]

## Sheet: SH2-vs-peptide
Index	Name	Gene	Phosphosite	Mutation	YF mutant?	Sequence	# of Ys	c-Src (mean)	c-Src (stdev)	SHP2-C (mean)	SHP2-C (stdev)	Grb2 (mean)	Grb2 (stdev)	4G10 (mean)	4G10 (stdev)
1	A2M_Y708	A2M	Y708			LRVGFYESDVM	1	4.13727	1.22851	1.018	0.172085	0.934138	0.094663	1.41508	0.549463
2	A2M_Y708_R704H	A2M	Y708	R704H		LHVGFYESDVM	1	4.23064	1.03027	0.721327	0.289287	0.950493	0.127915	1.22149	0.153424
3	A2M_Y817	A2M	Y817			ATVLNYLPKCI	1	0.535028	0.20405	0.735979	0.128872	0.899295	0.0778667	0.637316	0.294032
4	A2M_Y817_L815Q	A2M	Y817	L815Q		ATVQNYLPKCI	1	0.496513	0.041456	0.580641	0.177452	0.826621	0.256646	0.575326	0.214709
5	AACS_Y117	AACS	Y117			DRVALYIAREG	1	0.487465	0.192548	0.927984	0.288242	0.895849	0.167941	0.869574	0.160225
6	AACS_Y117_I118V	AACS	Y117	I118V		DRVALYVAREG	1	0.42529	0.286009	0.643518	0.217471	0.825058	0.129109	0.847787	0.216136
7	AASDH_Y870	AASDH	Y870			TTGLIYIGSHD	1	0.623882	0.28382	0.690083	0.363673	1.038	0.167451	0.659737	0.293304
8	AASDH_Y870_T865A	AASDH	Y870	T865A		ATGLIYIGSHD	1	0.59814	0.376117	0.525841	0.0678969	0.758618	0.0663511	0.494775	0.23188
9	AASS_Y188	AASS	Y188			GMAHNYRNSSQ	1	0.481678	0.167119	0.570436	0.0386246	0.702325	0.259428	0.363766	0.229415
10	AASS_Y188_S191R	AASS	Y188	S191R		GMAHNYRNRSQ	1	0.480488	0.233518	0.392197	0.151009	0.703001	0.320518	0.307563	0.172383
11	AATK_Y93	AATK	Y93			NGPDVYVLPLT	1	0.552275	0.246281	0.742669	0.305066	0.804215	0.103278	0.406325	0.256315
12	AATK_Y93_L97V	AATK	Y93	L97V		NGPDVYVLPVT	1	0.593624	0.317115	0.616796	0.239115	0.902231	0.240563	0.477367	0.292884
13	ABCA4_Y2063	ABCA4	Y2063			LGLTVYADCLA	1	0.563568	0.184566	0.553191	0.326873	0.918074	0.170102	0.482252	0.231913
14	ABCA4_Y2063_G2059A	ABCA4	Y2063	G2059A		LALTVYADCLA	1	0.571977	0.241882	0.507776	0.127101	0.623696	0.121954	0.53996	0.197219
15	ABCA4_Y2063_L2060R	ABCA4	Y2063	L2060R		LGRTVYADCLA	1	1.71257	0.839076	3.39005	1.16202	1.14732	0.0479184	0.894823	0.0743691
16	ABCB7_Y345	ABCB7	Y345			YETVKYFNNER	2	9.64431	1.21704	1.12834	0.439386	0.867853	0.101016	1.72081	0.424289
17	ABCB7_Y345_F346I	ABCB7	Y345	F346I		YETVKYINNER	2	11.7622	0.635596	1.24165	0.424493	1.47475	0.420577	1.25956	0.212262
18	ABCB7_Y345_F346I_YF	ABCB7	Y345	F346I	YF	FETVKYINNER	1	0.440551	0.143006	0.712601	0.0567661	1.2313	0.172955	0.469615	0.238988
19	ABCB7_Y345_YF	ABCB7	Y345		YF	FETVKYFNNER	1	0.50904	0.150903	1.04245	0.32992	0.862315	0.276668	0.67856	0.166894
20	ABCC1_Y1508	ABCC1	Y1508			GEIQEYGAPSD	1	0.507448	0.095832	0.647657	0.206695	0.745115	0.0530043	0.49127	0.213683
21	ABCC1_Y1508_S1512L	ABCC1	Y1508	S1512L		GEIQEYGAPLD	1	0.454237	0.179195	0.734292	0.228113	0.822498	0.0736096	0.514049	0.238811
22	ABCC12_Y7	ABCC12	Y7			VGEGPYLISDL	1	0.41382	0.129584	0.66284	0.194509	0.786213	0.0126125	0.730126	0.133373
23	ABCC12_Y7_I9L	ABCC12	Y7	I9L		VGEGPYLLSDL	1	0.361304	0.0392531	0.547172	0.0554667	0.640916	0.0320505	0.518234	0.142449
24	ABCC2_Y845	ABCC2	Y845			VEKGSYSALLA	1	1.44861	0.188134	0.685688	0.0427994	0.663145	0.0804678	1.03955	0.146098
25	ABCC2_Y845_L849R	ABCC2	Y845	L849R		VEKGSYSALRA	1	0.554817	0.0494331	1.03651	0.225448	0.823382	0.224902	0.866584	0.202428
26	ABCC6_Y372	ABCC6	Y372			EQQNMYRLKVL	1	0.499014	0.273207	0.565931	0.313156	0.789952	0.142735	0.594944	0.18581
27	ABCC6_Y372_N370D	ABCC6	Y372	N370D		EQQDMYRLKVL	1	0.579855	0.121092	0.629635	0.369428	0.85211	0.0477201	0.826876	0.22257
28	ABCC8_Y1353	ABCC8	Y1353			NLSVRYDSSLK	1	0.58737	0.154694	0.862585	0.166328	0.886938	0.325099	0.61568	0.209686
29	ABCC8_Y1353_L1349Q	ABCC8	Y1353	L1349Q		NQSVRYDSSLK	1	0.404376	0.193564	0.608991	0.109348	0.674818	0.184023	0.373444	0.248447
30	ABCC8_Y1353_R1352H	ABCC8	Y1353	R1352H		NLSVHYDSSLK	1	0.50911	0.146914	0.546714	0.120064	0.793438	0.0707654	0.662177	0.216109
31	ABCC8_Y1353_R1352P	ABCC8	Y1353	R1352P		NLSVPYDSSLK	1	0.488721	0.182102	0.734763	0.498336	0.765203	0.0592956	0.398228	0.229398
32	ABCD1_Y180	ABCD1	Y180			FSQQTYYRVSN	2	0.819717	0.199383	0.672104	0.286557	0.859501	0.208575	2.92255	0.814946
33	ABCD1_Y180_Q178E	ABCD1	Y180	Q178E		FSQETYYRVSN	2	0.65407	0.104104	0.627613	0.23041	0.840838	0.119457	3.22806	2.17261
34	ABCD1_Y180_Q178E_YF	ABCD1	Y180	Q178E	YF	FSQETYFRVSN	1	0.466207	0.0936773	0.54388	0.0627606	0.481427	0.317304	1.41884	0.772802
35	ABCD1_Y180_R182P	ABCD1	Y180	R182P		FSQQTYYPVSN	2	0.876991	0.418566	0.817643	0.18991	0.93754	0.244966	4.04225	1.28463
36	ABCD1_Y180_R182P_YF	ABCD1	Y180	R182P	YF	FSQQTYFPVSN	1	0.599041	0.213881	0.810883	0.0977223	0.646725	0.23221	2.47347	2.38594
37	ABCD1_Y180_Y181C	ABCD1	Y180	Y181C		FSQQTYCRVSN	1	1.01559	0.128028	0.687517	0.151516	0.817404	0.110475	0.718158	0.240281
38	ABCD1_Y180_YF	ABCD1	Y180		YF	FSQQTYFRVSN	1	1.09205	0.352572	1.15718	0.532158	0.886528	0.36836	2.57146	1.13464
39	ABCD1_Y181	ABCD1	Y181			SQQTYYRVSNM	2	0.635838	0.192964	0.789221	0.332444	0.853482	0.0683959	3.07957	2.07914
40	ABCD1_Y181_Q178E	ABCD1	Y181	Q178E		SQETYYRVSNM	2	0.472557	0.162631	0.790476	0.266067	0.656969	0.130375	1.90346	1.50178
41	ABCD1_Y181_Q178E_YF	ABCD1	Y181	Q178E	YF	SQETFYRVSNM	1	0.597105	0.182788	0.807344	0.242285	0.835977	0.321669	1.53466	0.815148
42	ABCD1_Y181_R182P	ABCD1	Y181	R182P		SQQTYYPVSNM	2	0.531947	0.151144	0.533878	0.213902	0.863962	0.350698	2.36042	0.464344
43	ABCD1_Y181_R182P_YF	ABCD1	Y181	R182P	YF	SQQTFYPVSNM	1	0.466478	0.242198	0.644052	0.296668	0.880685	0.0513171	0.390675	0.190121
44	ABCD1_Y181_Y181C	ABCD1	Y181	Y181C		SQQTYCRVSNM	1	1.01279	0.420135	0.615851	0.310279	0.897277	0.287477	0.701666	0.203488
45	ABCD1_Y181_Y181C_YF	ABCD1	Y181	Y181C	YF	SQQTFCRVSNM	0	0.501719	0.212449	0.713494	0.0358688	0.808042	0.259431	0.437421	0.224994
46	ABCD1_Y181_YF	ABCD1	Y181		YF	SQQTFYRVSNM	1	0.524884	0.149668	0.762029	0.0109745	0.819684	0.226837	0.867379	0.163981
47	ABCD1_Y281	ABCD1	Y281			KGELRYMHSRV	1	1.27259	0.820525	1.32952	0.45324	1.37716	0.198654	0.949402	0.269238
48	ABCD1_Y281_G277R	ABCD1	Y281	G277R		KRELRYMHSRV	1	1.49325	1.45748	1.64722	1.08906	1.43056	0.2256	0.9607	0.0445351
49	ABCD1_Y281_G277W	ABCD1	Y281	G277W		KWELRYMHSRV	1	0.71615	0.131591	0.877953	0.0348317	1.06176	0.122836	0.755903	0.22442
50	ABCD1_Y281_K276E	ABCD1	Y281	K276E		EGELRYMHSRV	1	0.432342	0.153182	0.512821	0.257267	0.677302	0.211231	0.586383	0.312517
51	ABCD1_Y281_R280C	ABCD1	Y281	R280C		KGELCYMHSRV	1	0.632294	0.169208	0.882985	0.201399	1.30658	0.460383	0.660705	0.295868
52	ABCD1_Y281_R285P	ABCD1	Y281	R285P		KGELRYMHSPV	1	0.532541	0.115363	0.579745	0.13689	0.93089	0.241775	0.724786	0.148842
53	ABCD1_Y337	ABCD1	Y337			QFLMKYVWSAS	1	0.498823	0.248266	0.668192	0.183613	0.67733	0.0922577	0.604931	0.254408
54	ABCD1_Y337_K336M	ABCD1	Y337	K336M		QFLMMYVWSAS	1	0.543202	0.187496	1.02634	0.637698	0.928615	0.189574	0.754106	0.290706
55	ABCD1_Y337_S342P	ABCD1	Y337	S342P		QFLMKYVWSAP	1	0.595161	0.139398	0.653378	0.145323	0.940631	0.263149	0.591186	0.212243
56	ABCD1_Y337_W339R	ABCD1	Y337	W339R		QFLMKYVRSAS	1	0.368697	0.0221422	0.927391	0.63914	0.516536	0.131096	0.190954	0.0320014
57	ABCG8_Y209	ABCG8	Y209			RVGNMYVRGLS	1	0.563605	0.152112	0.731806	0.343707	0.994092	0.0486888	0.505445	0.25282
58	ABCG8_Y209_V210M	ABCG8	Y209	V210M		RVGNMYMRGLS	1	1.01002	0.676965	1.69584	0.794035	1.41793	0.18777	1.02681	0.163435
59	ABHD12_Y345	ABHD12	Y345			LGRKLYSIAAP	1	0.593461	0.0809911	0.583275	0.435223	0.787762	0.390171	0.633059	0.337964
60	ABHD12_Y345_A349T	ABHD12	Y345	A349T		LGRKLYSIATP	1	0.61566	0.235779	0.620799	0.469732	1.10638	0.438266	0.661473	0.192527
61	ABI1_Y333	ABI1	Y333			TSSGGYRRTPS	1	0.659624	0.302348	0.559622	0.230116	0.825714	0.220888	0.346899	0.228949
62	ABI1_Y333_G331A	ABI1	Y333	G331A		TSSAGYRRTPS	1	0.450074	0.448525	0.405411	0.123955	1.03044	0.616435	0.236322	0.160438
63	ABL1_Y139	ABL1	Y139			RNAAEYLLSSG	1	0.565879	0.324103	0.59514	0.306599	0.997508	0.556867	0.690916	0.343835
64	ABL1_Y139_L140P	ABL1	Y139	L140P		RNAAEYPLSSG	1	0.496946	0.296252	0.35444	0.236123	0.865257	0.0441707	0.44501	0.278997
65	ABL1_Y167	ABL1	Y167			SISLRYEGRVY	2	0.684628	0.0534984	0.880896	0.191578	1.11305	0.133072	0.933152	0.325253
66	ABL1_Y167_R166K	ABL1	Y167	R166K		SISLKYEGRVY	2	0.388253	0.0570238	0.660114	0.238888	0.814104	0.22338	0.817313	0.128239
67	ABL1_Y167_R166K_YF	ABL1	Y167	R166K	YF	SISLKYEGRVF	1	0.48941	0.122	0.986525	0.563454	0.860326	0.123172	0.49108	0.244114
68	ABL1_Y167_YF	ABL1	Y167		YF	SISLRYEGRVF	1	0.680027	0.107107	0.925697	0.336938	1.0508	0.215945	0.784579	0.360008
69	ABL1_Y226	ABL1	Y226			NKPTVYGVSPN	1	0.501492	0.16302	0.522745	0.140925	0.899313	0.0613442	0.789855	0.122045
70	ABL1_Y226_Y226C	ABL1	Y226	Y226C		NKPTVCGVSPN	0	0.558749	0.107668	0.840848	0.128662	0.951843	0.256913	0.551788	0.278734
71	ABL2_Y515	ABL2	Y515			CPPKVYELMRA	1	1.53417	0.318755	0.693165	0.16012	0.943719	0.37332	0.815841	0.300016
72	ABL2_Y515_R519I	ABL2	Y515	R519I		CPPKVYELMIA	1	1.44233	0.243607	0.658025	0.0228822	0.817435	0.160335	0.632423	0.282322
73	ABL2_Y80	ABL2	Y80			ALHRPYGCDVE	1	0.582279	0.21752	0.720228	0.287276	1.01469	0.158763	0.69644	0.333532
74	ABL2_Y80_R78H	ABL2	Y80	R78H		ALHHPYGCDVE	1	0.773106	0.0473551	0.771461	0.304028	1.03171	0.159327	0.93624	0.182565
75	ABLIM1_Y439	ABLIM1	Y439			PSAEGYQDVRD	1	3.80231	1.2479	0.620544	0.0715983	0.811739	0.0858421	0.491093	0.230323
76	ABLIM1_Y439_P434T	ABLIM1	Y439	P434T		TSAEGYQDVRD	1	4.84897	0.467988	0.778659	0.21043	0.908623	0.0985166	0.527357	0.228189
77	ABLIM1_Y638	ABLIM1	Y638			LLASRYDSPIN	1	2.63366	0.984475	0.991422	0.0795111	0.704358	0.362795	0.77633	0.453348
78	ABLIM1_Y638_R637G	ABLIM1	Y638	R637G		LLASGYDSPIN	1	1.84451	0.202961	0.652986	0.126055	0.614983	0.100706	1.06478	0.420727
79	ACAD9_Y325	ACAD9	Y325			EMTAEYACTRK	1	0.691995	0.299763	1.03449	0.257654	1.21714	0.197252	0.679737	0.386563
80	ACAD9_Y325_A326T	ACAD9	Y325	A326T		EMTAEYTCTRK	1	0.409985	0.281649	0.638274	0.438746	0.63191	0.186903	0.486591	0.295694
81	ACAD9_Y611	ACAD9	Y611			LEKRAYICAHP	1	0.441995	0.0659326	0.888643	0.193445	0.799887	0.118863	0.628674	0.0690387
82	ACAD9_Y611_L606H	ACAD9	Y611	L606H		HEKRAYICAHP	1	0.96894	0.110518	0.962163	0.293782	0.960283	0.0408896	0.704426	0.276662
83	ACADM_Y352	ACADM	Y352			GRRNTYYASIA	2	0.999267	0.319843	0.624473	0.363085	0.77926	0.205383	0.506495	0.259175
84	ACADM_Y352_Y352C	ACADM	Y352	Y352C		GRRNTCYASIA	1	3.58013	0.659833	7.14135	4.25604	0.972199	0.0994163	0.438457	0.101141
85	ACADM_Y352_Y352C_YF	ACADM	Y352	Y352C	YF	GRRNTCFASIA	0	0.528628	0.0273986	0.565431	0.126571	0.841749	0.189583	0.435957	0.242955
86	ACADM_Y352_YF	ACADM	Y352		YF	GRRNTYFASIA	1	0.356426	0.263299	0.528203	0.23633	0.695953	0.208238	0.282317	0.117405
87	ACADM_Y353	ACADM	Y353			RRNTYYASIAK	2	0.952564	0.795702	1.65825	1.10452	0.888564	0.417061	0.468842	0.480195
88	ACADM_Y353_Y352C	ACADM	Y353	Y352C		RRNTCYASIAK	1	3.01455	1.10053	7.10538	4.64425	0.78446	0.236098	0.536682	0.148375
89	ACADM_Y353_YF	ACADM	Y353		YF	RRNTFYASIAK	1	1.08585	0.342735	1.67654	0.819809	0.772347	0.392329	0.262771	0.128593
90	ACADM_Y73	ACADM	Y73			DKTGEYPVPLI	1	0.398635	0.165855	0.697064	0.170346	0.666402	0.0762503	0.409564	0.213888
91	ACADM_Y73_I78T	ACADM	Y73	I78T		DKTGEYPVPLT	1	0.473506	0.237518	0.5224	0.232776	0.923745	0.0802867	0.551428	0.282342
92	ACADSB_Y372	ACADSB	Y372			ASMAKYYASEI	2	0.574805	0.0307689	0.554095	0.249658	0.849408	0.217576	1.19957	0.351024
93	ACADSB_Y372_E376G	ACADSB	Y372	E376G		ASMAKYYASGI	2	0.466022	0.146904	0.594896	0.253582	0.738765	0.330648	0.997367	0.150606
94	ACADSB_Y372_E376G_YF	ACADSB	Y372	E376G	YF	ASMAKYFASGI	1	0.444799	0.115897	0.859811	0.188688	1.01374	0.275749	0.472495	0.306466
95	ACADSB_Y372_YF	ACADSB	Y372		YF	ASMAKYFASEI	1	0.496774	0.130425	0.676645	0.228644	0.75029	0.142947	0.440636	0.241758
96	ACADSB_Y373	ACADSB	Y373			SMAKYYASEIA	2	0.479896	0.233088	0.633925	0.0145385	0.756406	0.347655	0.935714	0.320562
97	ACADSB_Y373_E376G	ACADSB	Y373	E376G		SMAKYYASGIA	2	0.577971	0.147214	0.790658	0.190814	0.770557	0.0571693	0.85421	0.180113
98	ACADSB_Y373_E376G_YF	ACADSB	Y373	E376G	YF	SMAKFYASGIA	1	0.359138	0.205114	1.00033	0.29098	0.700704	0.0983058	0.574176	0.312847
99	ACADSB_Y373_YF	ACADSB	Y373		YF	SMAKFYASEIA	1	0.392782	0.163582	0.673791	0.100996	0.788435	0.0655713	0.521295	0.297702
100	ACAN_Y100	ACAN	Y100			RVNSAYQDKVS	1	0.455021	0.156956	0.678715	0.457033	0.784355	0.100261	0.595816	0.0367335
101	ACAN_Y100_D102E	ACAN	Y100	D102E		RVNSAYQEKVS	1	0.448006	0.182884	0.528765	0.239655	1.08134	0.282002	0.545186	0.303
102	ACAT1_Y161	ACAT1	Y161			MSNVPYVMNRG	1	0.399451	0.177369	0.656717	0.21775	0.91945	0.189832	0.934118	0.18584
103	ACAT1_Y161_N158D	ACAT1	Y161	N158D		MSDVPYVMNRG	1	0.452485	0.0925173	0.616666	0.287483	1.11043	0.371539	1.4416	0.240092
104	ACAT1_Y331	ACAT1	Y331			PIAPVYAASMV	1	0.506399	0.202353	0.698756	0.0970439	0.88151	0.315982	0.962335	0.278247
105	ACAT1_Y331_A333P	ACAT1	Y331	A333P		PIAPVYAPSMV	1	0.620639	0.167323	0.717807	0.209804	0.78535	0.1537	1.80545	0.347283
106	ACAT1_Y90	ACAT1	Y90			EVKEAYMGNVL	1	0.542088	0.187011	0.698633	0.354343	0.881374	0.192231	0.485771	0.204904
107	ACAT1_Y90_N93S	ACAT1	Y90	N93S		EVKEAYMGSVL	1	0.45162	0.2135	0.671101	0.156453	0.882591	0.0657828	0.420854	0.230943
108	ACE_Y151	ACE	Y151			NMSRIYSTAKV	1	0.545124	0.139625	1.24956	0.539777	0.900533	0.0776164	0.585282	0.286718
109	ACE_Y151_A154T	ACE	Y151	A154T		NMSRIYSTTKV	1	0.396012	0.205139	1.06367	0.668944	0.972173	0.376597	0.702119	0.287561
110	ACO2_Y665	ACO2	Y665			IGDENYGEGSS	1	0.449305	0.19944	0.859703	0.233418	0.814262	0.0163445	0.501143	0.235287
111	ACO2_Y665_G661R	ACO2	Y665	G661R		IRDENYGEGSS	1	0.532403	0.181994	1.01224	0.251864	0.684735	0.110757	0.444541	0.26971
112	ACO2_Y71	ACO2	Y71			SEKIVYGHLDD	1	0.559998	0.12817	0.926011	0.270805	0.865485	0.0960191	0.479657	0.232715
113	ACO2_Y71_L74V	ACO2	Y71	L74V		SEKIVYGHVDD	1	0.555555	0.192918	1.59342	0.344614	0.903003	0.201391	0.612928	0.291723
114	ACOT4_Y52	ACOT4	Y52			RAHARYCADAR	1	0.655759	0.126398	0.746417	0.15541	0.919975	0.153511	0.630481	0.170855
115	ACOT4_Y52_R57C	ACOT4	Y52	R57C		RAHARYCADAC	1	0.871934	0.565146	0.898489	0.375483	0.914653	0.0963581	0.695963	0.256401
116	ACOX1_Y232	ACOX1	Y232			GPKFGYDEIDN	1	16.6942	3.14159	0.657634	0.118135	0.844877	0.140241	0.519209	0.288086
117	ACOX1_Y232_G231V	ACOX1	Y232	G231V		GPKFVYDEIDN	1	24.5312	9.27588	0.652895	0.0175406	0.708907	0.0593645	0.502784	0.329115
118	ACOX1_Y275	ACOX1	Y275			SNKLTYGTMVF	1	0.504049	0.0662228	1.04751	0.417909	0.924619	0.163078	1.02852	0.165229
119	ACOX1_Y275_M278V	ACOX1	Y275	M278V		SNKLTYGTVVF	1	0.596789	0.198798	4.29239	1.09416	0.920269	0.305895	0.766116	0.270595
120	ACOXL_Y260	ACOXL	Y260			TIAIRYSHSRR	1	0.494567	0.260055	0.44045	0.282795	0.607761	0.124103	0.263377	0.169657
121	ACOXL_Y260_T255M	ACOXL	Y260	T255M		MIAIRYSHSRR	1	0.56045	0.38654	0.652202	0.447472	0.959125	0.189798	0.295203	0.157431
122	ACP1_Y132	ACP1	Y132			IIEDPYYGNDS	2	0.837371	0.107329	0.491798	0.231688	0.879738	0.104837	1.91874	0.261737
123	ACP1_Y132_S137F	ACP1	Y132	S137F		IIEDPYYGNDF	2	0.726274	0.0972386	0.488234	0.0576723	0.958162	0.226238	1.95821	0.282624
124	ACP1_Y132_S137F_YF	ACP1	Y132	S137F	YF	IIEDPYFGNDF	1	0.518843	0.244319	0.661994	0.165981	0.768668	0.122746	2.60412	0.9236
125	ACP1_Y132_YF	ACP1	Y132		YF	IIEDPYFGNDS	1	0.541141	0.186246	0.583645	0.171668	0.945529	0.146491	3.15168	1.02134
126	ACP1_Y133	ACP1	Y133			IEDPYYGNDSD	2	0.622603	0.0902762	0.709263	0.340437	1.07121	0.139848	1.33935	0.113863
127	ACP1_Y133_S137F	ACP1	Y133	S137F		IEDPYYGNDFD	2	0.679621	0.0608658	0.617213	0.0435867	0.863434	0.0450189	1.46523	0.376541
128	ACP1_Y133_S137F_YF	ACP1	Y133	S137F	YF	IEDPFYGNDFD	1	0.735834	0.0850536	0.753119	0.11954	1.09117	0.223955	0.577383	0.0863395
129	ACP1_Y133_YF	ACP1	Y133		YF	IEDPFYGNDSD	1	0.528595	0.0242065	0.855242	0.162962	0.942305	0.354719	0.571909	0.138324
130	ACSBG1_Y677	ACSBG1	Y677			AAARPYHIQKW	1	1.18594	0.562673	1.26675	0.0602938	1.40957	0.251683	2.22872	0.572393
131	ACSBG1_Y677_A673V	ACSBG1	Y677	A673V		AVARPYHIQKW	1	1.2754	0.649353	1.30722	0.330118	1.85289	0.550075	2.4644	0.424641
132	ACSF3_Y355	ACSF3	Y355			TLLERYGMTEI	1	0.462207	0.129789	0.866092	0.659207	0.906771	0.445897	0.473808	0.263959
133	ACSF3_Y355_E359K	ACSF3	Y355	E359K		TLLERYGMTKI	1	0.432648	0.141848	0.635596	0.473291	0.884157	0.31394	0.679666	0.374016
134	ACSF3_Y355_T358I	ACSF3	Y355	T358I		TLLERYGMIEI	1	0.982708	0.154482	0.883525	0.233491	0.747757	0.210951	0.814828	0.245355
135	ACSF3_Y466	ACSF3	Y466			FKDGQYWIRGR	1	0.45979	0.311979	0.358752	0.169679	0.825311	0.252377	0.537879	0.24354
136	ACSF3_Y466_K462T	ACSF3	Y466	K462T		FTDGQYWIRGR	1	0.357888	0.122842	0.488592	0.232473	0.648496	0.0942723	1.12877	0.532865
137	ACSF3_Y466_R471Q	ACSF3	Y466	R471Q		FKDGQYWIRGQ	1	0.591817	0.0137685	0.688001	0.322872	0.855952	0.062458	3.81131	1.49936
138	ACSF3_Y466_R471W	ACSF3	Y466	R471W		FKDGQYWIRGW	1	0.470225	0.114661	0.733173	0.237288	0.869764	0.300927	2.6836	1.18884
139	ACSM1_Y477	ACSM1	Y477			INASGYRIGPA	1	0.453472	0.101861	0.632671	0.142068	0.798714	0.113787	0.532582	0.191671
140	ACSM1_Y477_I479V	ACSM1	Y477	I479V		INASGYRVGPA	1	0.358284	0.0523519	0.690792	0.226374	0.852782	0.120932	0.478163	0.218997
141	ACTA1_Y145	ACTA1	Y145			AVLSLYASGRT	1	0.554617	0.128479	0.7308	0.0529753	0.970797	0.197233	1.55032	0.804361
142	ACTA1_Y145_A140P	ACTA1	Y145	A140P		PVLSLYASGRT	1	0.484322	0.397612	0.926241	0.603037	0.841049	0.598592	1.77922	0.721715
143	ACTA1_Y145_G148D	ACTA1	Y145	G148D		AVLSLYASDRT	1	0.452311	0.102701	0.879684	0.0536297	0.894867	0.0465846	1.61985	0.711691
144	ACTA1_Y145_L142P	ACTA1	Y145	L142P		AVPSLYASGRT	1	0.414877	0.196001	0.643169	0.175448	0.817759	0.0831448	1.60266	0.814379
145	ACTA1_Y145_T150N	ACTA1	Y145	T150N		AVLSLYASGRN	1	0.668756	0.122695	0.975711	0.172842	0.866554	0.11242	1.59512	0.518755
146	ACTA1_Y168	ACTA1	Y168			HNVPIYEGYAL	2	2.96861	0.442983	1.01091	0.213527	0.881105	0.0589647	3.79234	0.959095
147	ACTA1_Y168_A172G	ACTA1	Y168	A172G		HNVPIYEGYGL	2	1.33481	0.259053	0.886315	0.193642	0.755435	0.11588	1.96095	0.242037
148	ACTA1_Y168_A172G_YF	ACTA1	Y168	A172G	YF	HNVPIYEGFGL	1	0.512907	0.100719	0.822898	0.268164	0.849933	0.28795	0.515531	0.261139
149	ACTA1_Y168_V165L	ACTA1	Y168	V165L		HNLPIYEGYAL	2	2.84494	0.518122	0.713985	0.562958	0.834922	0.196291	4.12793	1.59969
150	ACTA1_Y168_V165L_YF	ACTA1	Y168	V165L	YF	HNLPIYEGFAL	1	0.579279	0.044983	0.720794	0.166439	0.836971	0.189236	0.497968	0.234312
151	ACTA1_Y168_V165M	ACTA1	Y168	V165M		HNMPIYEGYAL	2	2.92788	0.734238	0.892581	0.0723612	0.709502	0.458672	3.90933	0.938858
152	ACTA1_Y168_V165M_YF	ACTA1	Y168	V165M	YF	HNMPIYEGFAL	1	0.430593	0.19646	0.84666	0.30041	0.607027	0.171343	0.527206	0.311694
153	ACTA1_Y168_YF	ACTA1	Y168		YF	HNVPIYEGFAL	1	0.430558	0.072555	0.794238	0.315135	0.848803	0.499608	0.538584	0.253661
154	ACTA1_Y171	ACTA1	Y171			PIYEGYALPHA	2	2.11559	0.485488	0.616809	0.0749413	0.71996	0.0404288	1.17271	0.197868
155	ACTA1_Y171_A172G	ACTA1	Y171	A172G		PIYEGYGLPHA	2	0.738858	0.138595	0.519617	0.311564	0.790298	0.483554	2.18878	0.869154
156	ACTA1_Y171_A172G_YF	ACTA1	Y171	A172G	YF	PIFEGYGLPHA	1	0.516367	0.195697	0.581155	0.197316	0.611722	0.146345	1.66437	0.242696
157	ACTA1_Y171_YF	ACTA1	Y171		YF	PIFEGYALPHA	1	4.61585	1.60751	0.769431	0.343975	0.876983	0.375789	2.47322	0.81314
158	ACTA1_Y190	ACTA1	Y190			RDLTDYLMKIL	1	1.15304	0.239237	1.37131	0.157217	1.42824	0.141919	0.914612	0.362333
159	ACTA1_Y190_R185C	ACTA1	Y190	R185C		CDLTDYLMKIL	1	0.664129	0.24123	0.647086	0.0227885	0.97271	0.281783	0.685929	0.0916206
160	ACTA1_Y190_R185D	ACTA1	Y190	R185D		DDLTDYLMKIL	1	0.689432	0.152384	1.26446	0.322436	0.962037	0.256294	0.667285	0.409395
161	ACTA1_Y190_R185G	ACTA1	Y190	R185G		GDLTDYLMKIL	1	0.711008	0.245763	1.18656	0.181385	1.4392	0.338279	0.85645	0.452952
162	ACTA1_Y190_R185S	ACTA1	Y190	R185S		SDLTDYLMKIL	1	0.608217	0.256149	0.902734	0.151978	1.16349	0.117556	0.74188	0.483641
163	ACTA1_Y200	ACTA1	Y200			LTERGYSFVTT	1	7.79751	1.07655	6.24148	1.84515	0.793972	0.148899	2.75381	0.774961
164	ACTA1_Y200_E197D	ACTA1	Y200	E197D		LTDRGYSFVTT	1	9.99987	1.58946	6.51683	1.38222	0.987902	0.481324	3.53302	1.06971
165	ACTA1_Y200_G199S	ACTA1	Y200	G199S		LTERSYSFVTT	1	5.23467	1.28798	4.36909	0.825942	0.945238	0.196281	1.65272	0.182535
166	ACTA1_Y200_R198L	ACTA1	Y200	R198L		LTELGYSFVTT	1	8.79848	1.9988	3.20279	1.35115	0.796932	0.166772	3.07641	0.530674
167	ACTA1_Y220	ACTA1	Y220			KEKLCYVALDF	1	0.459748	0.113532	1.03834	0.447115	0.727417	0.288895	0.599946	0.152746
168	ACTA1_Y220_L223P	ACTA1	Y220	L223P		KEKLCYVAPDF	1	0.723771	0.101355	0.730788	0.122775	0.971303	0.211681	1.01114	0.134526
169	ACTA1_Y242	ACTA1	Y242			SLEKSYELPDG	1	1.26025	0.343098	0.650112	0.239258	0.823931	0.232586	0.553046	0.262397
170	ACTA1_Y242_E243K	ACTA1	Y242	E243K		SLEKSYKLPDG	1	0.469244	0.22108	0.592266	0.123031	0.889031	0.063571	0.455091	0.244653
171	ACTA1_Y281	ACTA1	Y281			IHETTYNSIMK	1	1.92599	0.316761	1.67738	0.269385	0.861741	0.108574	0.700993	0.168877
172	ACTA1_Y281_M285K	ACTA1	Y281	M285K		IHETTYNSIKK	1	1.05234	0.0494539	1.62634	0.325533	0.672958	0.0292963	0.507841	0.151227
173	ACTA1_Y281_N282K	ACTA1	Y281	N282K		IHETTYKSIMK	1	0.550317	0.186024	3.30572	1.33859	0.803998	0.0531334	0.709627	0.436849
174	ACTA1_Y281_Y281H	ACTA1	Y281	Y281H		IHETTHNSIMK	0	0.430162	0.105237	0.536987	0.155548	0.7364	0.0695532	0.413785	0.242637
175	ACTA1_Y296	ACTA1	Y296			IRKDLYANNVM	1	0.731892	0.336363	0.380857	0.209183	1.2141	0.585496	1.65925	1.3457
176	ACTA1_Y296_D294V	ACTA1	Y296	D294V		IRKVLYANNVM	1	0.81978	0.0609521	0.944455	0.187021	1.4403	0.598381	0.757965	0.063655
177	ACTA1_Y364	ACTA1	Y364			ITKQEYDEAGP	1	7.70156	2.0142	0.786405	0.387075	0.86864	0.0969713	0.527691	0.290117
178	ACTA1_Y364_I359L	ACTA1	Y364	I359L		LTKQEYDEAGP	1	8.70388	2.80241	0.874399	0.202758	1.08013	0.464418	0.770132	0.429385
179	ACTA1_Y71	ACTA1	Y71			ILTLKYPIEHG	1	0.502298	0.118138	0.806246	0.157283	0.816174	0.0435995	0.38011	0.207851
180	ACTA1_Y71_E74K	ACTA1	Y71	E74K		ILTLKYPIKHG	1	0.786842	0.0888295	1.45461	0.938056	1.12401	0.246088	0.730634	0.311873
181	ACTA1_Y71_H75L	ACTA1	Y71	H75L		ILTLKYPIELG	1	0.73074	0.0642825	0.940438	0.410644	1.13744	0.264036	0.50017	0.25204
182	ACTA1_Y71_H75R	ACTA1	Y71	H75R		ILTLKYPIERG	1	0.691052	0.159135	1.01089	0.22806	0.900615	0.346252	0.473967	0.32152
183	ACTA1_Y71_I66N	ACTA1	Y71	I66N		NLTLKYPIEHG	1	0.50656	0.267729	0.718275	0.404964	0.803882	0.277035	0.372816	0.239618
184	ACTA1_Y71_T68I	ACTA1	Y71	T68I		ILILKYPIEHG	1	1.58404	0.522444	1.7149	0.672086	2.06653	0.695798	1.36678	0.805311
185	ACTA1_Y93	ACTA1	Y93			WHHTFYNELRV	1	1.89604	0.684949	1.51586	0.541937	1.20013	0.145541	1.0625	0.186545
186	ACTA1_Y93_L96P	ACTA1	Y93	L96P		WHHTFYNEPRV	1	1.57143	0.331301	1.07304	0.555806	1.40208	0.577862	1.49736	0.807929
187	ACTA2_Y145_R149C	ACTA2	Y145	R149C		AVLSLYASGCT	1	0.378682	0.123291	0.547243	0.157049	0.860834	0.510509	0.567512	0.118977
188	ACTA2_Y145_Y145C	ACTA2	Y145	Y145C		AVLSLCASGRT	0	0.48803	0.181868	0.857073	0.242842	0.80735	0.313801	0.613466	0.344288
189	ACTA2_Y190_R185Q	ACTA2	Y190	R185Q		QDLTDYLMKIL	1	0.860579	0.266552	1.23013	0.847197	1.32862	0.282501	0.761183	0.514267
190	ACTA2_Y200_T196S	ACTA2	Y200	T196S		LSERGYSFVTT	1	8.51782	2.34168	5.25822	0.786055	0.805787	0.190886	3.20187	1.38364
191	ACTA2_Y296	ACTA2	Y296			IRKDLYANNVL	1	0.569013	0.0773433	0.6145	0.23404	1.23024	0.201082	1.25209	0.548193
192	ACTA2_Y296_R292G	ACTA2	Y296	R292G		IGKDLYANNVL	1	0.535305	0.134491	0.574349	0.122886	0.844354	0.231223	1.1138	0.649572
193	ACTB_Y188_R183W	ACTB	Y188	R183W		WDLTDYLMKIL	1	1.31775	0.326724	1.91765	0.88835	1.65678	0.372017	1.29726	0.503977
194	ACTB_Y198	ACTB	Y198			LTERGYSFTTT	1	0.595768	0.175377	0.653584	0.206646	0.745731	0.179607	1.17376	0.137168
195	ACTB_Y198_R196C	ACTB	Y198	R196C		LTECGYSFTTT	1	0.736172	0.0778307	0.601861	0.235238	0.57379	0.229817	1.0986	0.146613
196	ACTB_Y198_R196H	ACTB	Y198	R196H		LTEHGYSFTTT	1	1.88173	0.255893	0.882725	0.244217	0.817207	0.362669	3.55238	1.2787
197	ACTB_Y240_P243L	ACTB	Y240	P243L		SLEKSYELLDG	1	4.68665	0.902579	0.728888	0.199493	1.01359	0.303505	0.648173	0.310692
198	ACTB_Y69_L65V	ACTB	Y69	L65V		IVTLKYPIEHG	1	0.449557	0.226351	0.80729	0.217138	0.770381	0.275555	0.410528	0.276049
199	ACTC1_Y168_P166A	ACTC1	Y168	P166A		HNVAIYEGYAL	2	2.31418	0.636046	0.837627	0.14651	0.716194	0.144845	2.58612	0.999155
200	ACTC1_Y168_P166A_YF	ACTC1	Y168	P166A	YF	HNVAIYEGFAL	1	0.509416	0.118897	1.0022	0.624248	0.877179	0.31496	0.535939	0.300328
201	ACTC1_Y168_Y168C	ACTC1	Y168	Y168C		HNVPICEGYAL	1	0.587011	0.127972	0.778978	0.107013	0.832575	0.289569	0.81129	0.129881
202	ACTC1_Y168_Y168C_YF	ACTC1	Y168	Y168C	YF	HNVPICEGFAL	0	0.555019	0.195369	1.15497	0.969745	0.870939	0.138198	0.505815	0.186137
203	ACTC1_Y171_P166A	ACTC1	Y171	P166A		AIYEGYALPHA	2	2.47559	1.38349	0.725687	0.265595	0.792489	0.121802	1.01514	0.320517
204	ACTC1_Y171_P166A_YF	ACTC1	Y171	P166A	YF	AIFEGYALPHA	1	5.11048	2.46485	0.517909	0.252574	0.932438	0.284576	1.88225	1.05247
205	ACTC1_Y171_Y168C	ACTC1	Y171	Y168C		PICEGYALPHA	1	4.73877	1.22502	0.918052	0.222783	0.950778	0.271058	1.23617	0.245238
206	ACTC1_Y242_S241G	ACTC1	Y242	S241G		SLEKGYELPDG	1	5.20861	1.22866	0.847366	0.147762	0.831555	0.20155	0.710912	0.309402
207	ACTC1_Y296_A297S	ACTC1	Y296	A297S		IRKDLYSNNVL	1	0.61058	0.161649	0.834845	0.112355	0.836278	0.190561	1.49449	0.707342
208	ACTC1_Y308	ACTC1	Y308			GGTTMYPGIAD	1	0.393063	0.117761	0.782696	0.223332	0.870531	0.0753365	0.457352	0.278314
209	ACTC1_Y308_M307L	ACTC1	Y308	M307L		GGTTLYPGIAD	1	0.452874	0.0857931	0.648065	0.104984	0.762222	0.13707	0.425669	0.193718
210	ACTC1_Y364	ACTC1	Y364			ISKQEYDEAGP	1	6.15937	1.23583	0.71762	0.0636907	0.921462	0.225277	0.564677	0.202663
211	ACTC1_Y364_E363G	ACTC1	Y364	E363G		ISKQGYDEAGP	1	1.42173	0.823065	0.613081	0.447607	0.916273	0.0217449	0.524998	0.33787
212	ACTC1_Y93_H90Y	ACTC1	Y93	H90Y		WHYTFYNELRV	2	0.571507	0.164081	0.779132	0.0685106	0.99151	0.0545962	0.743782	0.174636
213	ACTC1_Y93_H90Y_YF	ACTC1	Y93	H90Y	YF	WHFTFYNELRV	1	0.534565	0.143335	0.482565	0.111624	0.781941	0.318479	0.512402	0.269931
214	ACTC1_Y93_R97C	ACTC1	Y93	R97C		WHHTFYNELCV	1	1.20448	0.779666	0.76723	0.13091	0.860221	0.100206	0.73774	0.0449976
215	ACTG1_Y188_D187H	ACTG1	Y188	D187H		RDLTHYLMKIL	1	1.59744	1.02249	1.53824	0.319827	1.64196	0.30016	1.20472	0.411924
216	ACTG1_Y198_T203K	ACTG1	Y198	T203K		LTERGYSFTTK	1	0.454062	0.168605	0.652741	0.166461	0.679472	0.108197	0.478982	0.0291474
217	ACTG1_Y69_P70L	ACTG1	Y69	P70L		ILTLKYLIEHG	1	0.8795	0.0408318	1.0287	0.200153	1.24548	0.290469	0.92769	0.429293
218	ACTG1_Y91_T89I	ACTG1	Y91	T89I		WHHIFYNELRV	1	0.511987	0.172742	0.638148	0.0667138	0.700712	0.0427237	0.498961	0.210406
219	ACTG2_Y144_R148S	ACTG2	Y144	R148S		AVLSLYASGST	1	0.61147	0.196123	0.907282	0.421735	1.05665	0.214515	1.18632	0.30628
220	ACTG2_Y199_G198D	ACTG2	Y199	G198D		LTERDYSFVTT	1	0.677759	0.480479	1.37387	0.761725	0.791926	0.0937404	0.412892	0.196657
221	ACTL6A_Y69	ACTL6A	Y69			GGPTYYIDTNA	2	0.679231	0.044218	0.693603	0.13019	0.821791	0.104502	4.44131	2.30845
222	ACTL6A_Y69_P66S	ACTL6A	Y69	P66S		GGSTYYIDTNA	2	0.731235	0.167983	0.906065	0.399574	1.02864	0.258181	2.92039	1.62889
223	ACTL6A_Y69_P66S_YF	ACTL6A	Y69	P66S	YF	GGSTFYIDTNA	1	0.562306	0.202296	0.952157	0.388517	0.735257	0.187081	0.613321	0.24972
224	ACTL6A_Y69_YF	ACTL6A	Y69		YF	GGPTFYIDTNA	1	0.577204	0.219635	0.607794	0.259261	0.874429	0.123288	0.563396	0.196522
225	ACTN1_Y193	ACTN1	Y193			PELIDYGKLRK	1	0.478263	0.252216	0.600408	0.206315	0.580949	0.248686	0.396549	0.188552
226	ACTN1_Y193_R197W	ACTN1	Y193	R197W		PELIDYGKLWK	1	0.537528	0.193954	0.989306	0.344296	0.958247	0.285054	0.614759	0.187011
227	ACTN1_Y708	ACTN1	Y708			NKHTNYTMEHI	1	0.45795	0.202927	0.603275	0.185778	0.814218	0.149222	0.635834	0.154565
228	ACTN1_Y708_N707T	ACTN1	Y708	N707T		NKHTTYTMEHI	1	0.565377	0.164526	0.787046	0.286696	0.865104	0.112328	0.967828	0.119818
229	ACTN2_Y599	ACTN2	Y599			SSSNPYSTVTM	1	3.41892	0.694797	7.62489	1.30703	0.766309	0.158535	1.47972	0.441141
230	ACTN2_Y599_M604V	ACTN2	Y599	M604V		SSSNPYSTVTV	1	3.3529	0.765781	12.3324	3.34355	0.667281	0.0710665	1.41898	0.394239
231	ACTN4_Y260	ACTN4	Y260			KAIMTYVSSFY	2	0.563999	0.122063	0.987481	0.144175	0.859984	0.248258	0.916467	0.191216
232	ACTN4_Y260_K255E	ACTN4	Y260	K255E		EAIMTYVSSFY	2	0.476838	0.324264	0.671752	0.216483	0.71229	0.0817914	0.670299	0.240294
233	ACTN4_Y260_K255E_YF	ACTN4	Y260	K255E	YF	EAIMTYVSSFF	1	0.4929	0.230285	0.641548	0.179338	0.658772	0.0590665	0.428688	0.263856
234	ACTN4_Y260_S262F	ACTN4	Y260	S262F		KAIMTYVFSFY	2	0.561412	0.116472	1.07688	0.29849	0.987323	0.291187	0.717469	0.196464
235	ACTN4_Y260_S262F_YF	ACTN4	Y260	S262F	YF	KAIMTYVFSFF	1	0.888301	0.180588	1.18915	0.278418	1.26149	0.415444	0.896335	0.371692
236	ACTN4_Y260_S262P	ACTN4	Y260	S262P		KAIMTYVPSFY	2	1.14976	0.431726	1.03435	0.292489	0.818092	0.345837	1.65517	0.384838
237	ACTN4_Y260_S262P_YF	ACTN4	Y260	S262P	YF	KAIMTYVPSFF	1	0.969957	0.215525	0.83646	0.100531	0.969652	0.159096	1.10545	0.175753
238	ACTN4_Y260_T259I	ACTN4	Y260	T259I		KAIMIYVSSFY	2	0.476391	0.0700633	0.845168	0.405573	0.816303	0.176213	0.56944	0.230662
239	ACTN4_Y260_T259I_YF	ACTN4	Y260	T259I	YF	KAIMIYVSSFF	1	0.567454	0.133583	0.966699	0.28871	0.94822	0.33914	0.669264	0.321867
240	ACTN4_Y260_YF	ACTN4	Y260		YF	KAIMTYVSSFF	1	0.676608	0.392439	0.878385	0.4018	0.961727	0.427137	0.6383	0.348208
241	ACTN4_Y265	ACTN4	Y265			YVSSFYHAFSG	2	2.19682	0.246728	1.79179	0.256326	1.20273	0.0500455	2.11454	0.462643
242	ACTN4_Y265_S262F	ACTN4	Y265	S262F		YVFSFYHAFSG	2	0.888864	0.320231	1.22855	0.508366	1.18636	0.317259	0.860189	0.248502
243	ACTN4_Y265_S262F_YF	ACTN4	Y265	S262F	YF	FVFSFYHAFSG	1	1.03747	0.495455	1.3097	0.321881	1.55181	0.747411	1.04307	0.209215
244	ACTN4_Y265_S262P	ACTN4	Y265	S262P		YVPSFYHAFSG	2	0.997072	0.242653	0.673368	0.243611	1.19474	0.263609	3.29878	1.81698
245	ACTN4_Y265_S262P_YF	ACTN4	Y265	S262P	YF	FVPSFYHAFSG	1	0.920587	0.0573607	1.19806	0.117844	0.992675	0.1602	1.65465	0.948159
246	ACTN4_Y265_YF	ACTN4	Y265		YF	FVSSFYHAFSG	1	0.950365	0.284912	1.06699	0.496936	1.33141	0.262089	0.920759	0.0246138
247	ACVRL1_Y375	ACVRL1	Y375			VGTKRYMAPEV	1	0.510747	0.102668	0.616033	0.166188	0.803759	0.0770152	0.521486	0.195941
248	ACVRL1_Y375_E379D	ACVRL1	Y375	E379D		VGTKRYMAPDV	1	0.496169	0.35099	0.522081	0.0635293	0.572991	0.0380274	0.534881	0.190297
249	ACVRL1_Y375_E379K	ACVRL1	Y375	E379K		VGTKRYMAPKV	1	0.63199	0.118451	1.44266	0.73406	1.18688	0.390709	0.631188	0.310257
250	ACVRL1_Y375_M376R	ACVRL1	Y375	M376R		VGTKRYRAPEV	1	0.527607	0.0591059	0.860512	0.121861	0.892291	0.182402	0.483777	0.223985
251	ACVRL1_Y375_M376V	ACVRL1	Y375	M376V		VGTKRYVAPEV	1	0.354484	0.1256	0.402796	0.112079	0.723594	0.157978	0.431603	0.242217
252	ACVRL1_Y375_P378L	ACVRL1	Y375	P378L		VGTKRYMALEV	1	0.813127	0.17059	0.804975	0.167631	0.976716	0.0559723	0.531096	0.273106
253	ACVRL1_Y375_P378S	ACVRL1	Y375	P378S		VGTKRYMASEV	1	0.449708	0.141941	0.598984	0.0323293	1.06264	0.431463	0.413291	0.196646
254	ACVRL1_Y375_R374Q	ACVRL1	Y375	R374Q		VGTKQYMAPEV	1	0.484547	0.242379	0.572347	0.117004	0.831731	0.0873408	0.788409	0.128941
255	ACVRL1_Y375_R374W	ACVRL1	Y375	R374W		VGTKWYMAPEV	1	0.737261	0.125005	0.67367	0.349125	0.95595	0.254987	2.2757	1.11635
256	ACVRL1_Y421	ACVRL1	Y421			GIVEDYRPPFY	2	0.466384	0.178872	0.812659	0.237433	0.730843	0.191575	1.31857	0.264719
257	ACVRL1_Y421_F425L	ACVRL1	Y421	F425L		GIVEDYRPPLY	2	0.428708	0.130894	0.782989	0.235068	0.859182	0.109375	1.30626	0.601513
258	ACVRL1_Y421_F425L_YF	ACVRL1	Y421	F425L	YF	GIVEDYRPPLF	1	0.349138	0.158707	0.670772	0.186633	0.801324	0.20331	0.792789	0.121909
259	ACVRL1_Y421_F425V	ACVRL1	Y421	F425V		GIVEDYRPPVY	2	0.470026	0.307502	0.524049	0.264245	0.825163	0.0853661	1.34769	0.456221
260	ACVRL1_Y421_F425V_YF	ACVRL1	Y421	F425V	YF	GIVEDYRPPVF	1	0.352645	0.0759372	0.737988	0.279894	0.725596	0.198198	0.767477	0.115776
261	ACVRL1_Y421_G416S	ACVRL1	Y421	G416S		SIVEDYRPPFY	2	0.461871	0.147516	0.622085	0.413252	0.599325	0.145945	1.36881	0.676384
262	ACVRL1_Y421_G416S_YF	ACVRL1	Y421	G416S	YF	SIVEDYRPPFF	1	0.443648	0.109327	0.730355	0.339222	0.829676	0.197677	0.991725	0.35573
263	ACVRL1_Y421_I417F	ACVRL1	Y421	I417F		GFVEDYRPPFY	2	0.626324	0.0345065	1.02649	0.296486	0.960303	0.142044	1.71897	1.25993
264	ACVRL1_Y421_I417F_YF	ACVRL1	Y421	I417F	YF	GFVEDYRPPFF	1	0.397655	0.203742	0.675354	0.14503	0.784461	0.158706	1.09428	0.517583
265	ACVRL1_Y421_P424R	ACVRL1	Y421	P424R		GIVEDYRPRFY	2	0.481149	0.28684	0.757299	0.423863	0.88238	0.380656	0.581167	0.233633
266	ACVRL1_Y421_P424R_YF	ACVRL1	Y421	P424R	YF	GIVEDYRPRFF	1	0.467956	0.313133	0.832008	0.222761	0.985443	0.38043	0.525902	0.265348
267	ACVRL1_Y421_P424T	ACVRL1	Y421	P424T		GIVEDYRPTFY	2	0.763283	0.367173	0.657046	0.0111782	0.875311	0.181402	1.09839	0.168021
268	ACVRL1_Y421_P424T_YF	ACVRL1	Y421	P424T	YF	GIVEDYRPTFF	1	0.446865	0.146075	0.695093	0.148067	0.845752	0.304605	0.784654	0.0970461
269	ACVRL1_Y421_Y426C	ACVRL1	Y421	Y426C		GIVEDYRPPFC	1	0.568718	0.290016	0.712852	0.257234	0.886726	0.0731311	0.928942	0.175939
270	ACVRL1_Y421_YF	ACVRL1	Y421		YF	GIVEDYRPPFF	1	0.52078	0.212661	0.615932	0.273009	0.818298	0.158394	1.01504	0.185905
271	ADA_Y290	ADA	Y290			NDQANYSLNTD	1	0.553998	0.285086	0.695794	0.205254	0.763711	0.235191	0.631924	0.0106183
272	ADA_Y290_S291L	ADA	Y290	S291L		NDQANYLLNTD	1	0.5272	0.179176	0.892982	0.231984	0.765309	0.123829	0.443395	0.161302
273	ADA_Y308	ADA	Y308			TLDTDYQMTKR	1	0.557869	0.216345	0.596881	0.183685	0.920337	0.298146	0.424546	0.207074
274	ADA_Y308_L304R	ADA	Y308	L304R		TRDTDYQMTKR	1	0.54396	0.131372	0.446891	0.248262	0.820815	0.0614423	0.609158	0.210541
275	ADA_Y84	ADA	Y84			IKRIAYEFVEM	1	0.97262	0.203782	0.691271	0.203052	0.729358	0.152675	0.797474	0.358603
276	ADA_Y84_A83D	ADA	Y84	A83D		IKRIDYEFVEM	1	0.500032	0.162565	0.560229	0.301254	0.966661	0.204933	0.460684	0.296071
277	ADA_Y84_K80R	ADA	Y84	K80R		IRRIAYEFVEM	1	1.1489	0.198154	0.435269	0.355943	0.541768	0.138763	0.61824	0.203655
278	ADA2_Y337	ADA2	Y337			HSLHDYKEALM	1	0.41782	0.0419186	0.42587	0.259634	0.702447	0.253858	0.37889	0.230009
279	ADA2_Y337_H335R	ADA2	Y337	H335R		HSLRDYKEALM	1	0.466798	0.0375171	0.699452	0.128658	0.932709	0.286068	0.488899	0.205407
280	ADAM12_Y895	ADAM12	Y895			RPAPQYPHQVP	1	0.646508	0.141551	0.687151	0.115238	1.06258	0.200094	0.69563	0.350998
281	ADAM12_Y895_P893S	ADAM12	Y895	P893S		RPASQYPHQVP	1	0.529673	0.0978405	0.791108	0.127318	0.883462	0.102465	0.470203	0.246704
282	ADAMTS16_Y1211	ADAMTS16	Y1211			CSHKFYGKQCC	1	0.764872	0.37596	1.008	0.293949	1.03774	0.230671	0.701158	0.128467
283	ADAMTS16_Y1211_K1209M	ADAMTS16	Y1211	K1209M		CSHMFYGKQCC	1	0.771964	0.0745993	0.827396	0.258824	1.14253	0.177682	0.765319	0.0632106
284	ADAMTS18_Y764	ADAMTS18	Y764			HKANEYYPVVL	2	0.985423	0.0769357	0.906584	0.405205	0.901566	0.275229	0.969041	0.610541
285	ADAMTS18_Y764_L769I	ADAMTS18	Y764	L769I		HKANEYYPVVI	2	0.587429	0.340997	1.06524	0.897666	0.664504	0.215492	0.584196	0.414998
286	ADAMTS18_Y764_L769I_YF	ADAMTS18	Y764	L769I	YF	HKANEYFPVVI	1	0.484942	0.161532	0.86011	0.0521175	0.767476	0.404543	0.477584	0.334136
287	ADAMTS18_Y764_YF	ADAMTS18	Y764		YF	HKANEYFPVVL	1	0.461581	0.142738	0.530069	0.37095	0.963335	0.296142	0.496529	0.351423
288	ADAMTS18_Y765	ADAMTS18	Y765			KANEYYPVVLI	2	0.40373	0.161109	0.625366	0.122139	0.682571	0.0583191	0.492898	0.242642
289	ADAMTS18_Y765_L769I	ADAMTS18	Y765	L769I		KANEYYPVVII	2	0.382658	0.0639442	0.457886	0.0650359	0.721464	0.145778	0.506988	0.191203
290	ADAMTS18_Y765_L769I_YF	ADAMTS18	Y765	L769I	YF	KANEFYPVVII	1	0.348601	0.0308629	0.596887	0.115994	0.626441	0.0475036	0.438285	0.11685
291	ADAMTS18_Y765_YF	ADAMTS18	Y765		YF	KANEFYPVVLI	1	0.387638	0.100861	0.421019	0.112471	0.662957	0.0741161	0.425565	0.201213
292	ADAMTS9_Y100	ADAMTS9	Y100			SSQAHYRLSAF	1	0.430368	0.0775465	0.720834	0.0485945	0.816094	0.213491	0.719131	0.0764222
293	ADAMTS9_Y100_S96P	ADAMTS9	Y100	S96P		SPQAHYRLSAF	1	0.480866	0.240397	0.687959	0.15227	0.970899	0.0891946	1.24105	0.153431
294	ADAMTS9_Y100_S96T	ADAMTS9	Y100	S96T		STQAHYRLSAF	1	0.512647	0.157843	0.858805	0.0696771	0.758988	0.20288	0.814731	0.176884
295	ADAMTSL2_Y594	ADAMTSL2	Y594			AMCVRYDGVEV	1	0.858835	0.275011	0.682461	0.167292	0.805091	0.0327966	0.615492	0.0417993
296	ADAMTSL2_Y594_R593C	ADAMTSL2	Y594	R593C		AMCVCYDGVEV	1	0.814962	0.229576	0.588596	0.111231	0.73633	0.109408	0.662251	0.0859576
297	ADAMTSL3_Y1365	ADAMTSL3	Y1365			ENEGTYVCIAT	1	0.394666	0.119547	0.600386	0.127546	0.739888	0.163867	0.546428	0.184285
298	ADAMTSL3_Y1365_T1370A	ADAMTSL3	Y1365	T1370A		ENEGTYVCIAA	1	0.424861	0.234772	0.401589	0.0878798	0.470702	0.120598	0.608722	0.395532
299	ADAR_Y587	ADAR	Y587			EESSHYSTEKE	1	0.548518	0.251591	0.645607	0.181986	0.955123	0.111766	0.522109	0.36011
300	ADAR_Y587_Y587C	ADAR	Y587	Y587C		EESSHCSTEKE	0	0.562216	0.333131	0.667932	0.407546	0.810417	0.112505	0.405241	0.168998
301	ADCY10_Y318	ADCY10	Y318			AIQDAYMHITS	1	1.27054	0.34369	0.741882	0.191128	0.824763	0.0111123	0.419834	0.22808
302	ADCY10_Y318_A313T	ADCY10	Y318	A313T		TIQDAYMHITS	1	1.25846	0.359894	0.895287	0.40967	0.902033	0.133286	0.486074	0.262908
303	ADD2_Y31	ADD2	Y31			EDDPEYMRLRN	1	0.505557	0.21607	0.586664	0.392839	0.837541	0.0713953	0.362624	0.25251
304	ADD2_Y31_D28N	ADD2	Y31	D28N		EDNPEYMRLRN	1	0.510773	0.304602	0.73034	0.0819765	0.850297	0.177136	0.52466	0.34357
305	ADD2_Y440	ADD2	Y440			NTPNTYLRVNV	1	0.485383	0.168442	1.28889	0.402979	0.9267	0.118222	0.696152	0.0850341
306	ADD2_Y440_T439A	ADD2	Y440	T439A		NTPNAYLRVNV	1	0.499196	0.201195	1.12327	0.195747	0.855673	0.218018	0.750176	0.0780799
307	ADGRA2_Y377	ADGRA2	Y377			AGITAYQSCLQ	1	0.394757	0.158491	0.497201	0.307063	0.826735	0.295938	0.674533	0.0695879
308	ADGRA2_Y377_T375K	ADGRA2	Y377	T375K		AGIKAYQSCLQ	1	0.570478	0.0706701	0.639784	0.102907	0.766943	0.0693728	0.726164	0.109993
309	ADGRD1_Y183	ADGRD1	Y183			EGLKVYVNGTL	1	0.502418	0.2015	0.756783	0.209483	1.6814	0.264094	0.629447	0.32869
310	ADGRD1_Y183_E178K	ADGRD1	Y183	E178K		KGLKVYVNGTL	1	0.54946	0.114616	0.703058	0.187362	1.32349	0.212516	0.631241	0.33833
311	ADGRD1_Y183_V184I	ADGRD1	Y183	V184I		EGLKVYINGTL	1	0.381003	0.0457518	0.659088	0.159545	1.32474	0.112923	0.530611	0.165024
312	ADGRD1_Y571	ADGRD1	Y571			LSSISYVGCSL	1	0.567061	0.142024	1.1031	0.21189	1.13025	0.116867	0.640867	0.196694
313	ADGRD1_Y571_I569V	ADGRD1	Y571	I569V		LSSVSYVGCSL	1	0.519116	0.29885	0.69087	0.195774	0.797679	0.0912479	0.616641	0.2384
314	ADGRD1_Y571_S567L	ADGRD1	Y571	S567L		LLSISYVGCSL	1	0.540281	0.069598	0.571346	0.0322539	0.960466	0.43081	0.640338	0.13408
315	ADGRD1_Y85	ADGRD1	Y85			GVTLLYYGRYN	3	1.05001	0.375245	1.24108	0.155428	1.28173	0.321075	4.13863	1.29336
316	ADGRD1_Y85_T82M	ADGRD1	Y85	T82M		GVMLLYYGRYN	3	0.95972	0.148931	0.920564	0.22676	1.17118	0.0702391	2.39918	0.576656
317	ADGRD1_Y85_T82M_YF	ADGRD1	Y85	T82M	YF	GVMLLYFGRFN	1	0.7456	0.307223	1.25294	0.745598	0.956263	0.23873	0.993041	0.378917
318	ADGRD1_Y85_Y85C	ADGRD1	Y85	Y85C		GVTLLCYGRYN	2	0.486284	0.169925	0.806145	0.377126	0.752671	0.270176	0.642114	0.124338
319	ADGRD1_Y85_Y85C_YF	ADGRD1	Y85	Y85C	YF	GVTLLCFGRFN	0	0.46523	0.0583188	0.862995	0.352224	0.92207	0.0538051	0.630783	0.10956
320	ADGRD1_Y85_Y89D	ADGRD1	Y85	Y89D		GVTLLYYGRDN	2	0.806648	0.203265	1.04412	0.204804	1.13446	0.345945	4.87572	1.10533
321	ADGRD1_Y85_Y89D_YF	ADGRD1	Y85	Y89D	YF	GVTLLYFGRDN	1	1.16357	0.425024	1.18806	0.31488	1.62909	0.418031	2.44788	0.461156
322	ADGRD1_Y85_YF	ADGRD1	Y85		YF	GVTLLYFGRFN	1	0.981332	0.427174	1.41307	0.753084	1.27244	0.622179	1.50339	0.63754
323	ADGRE1_Y534	ADGRE1	Y534			SDPIIYTLENI	1	0.519079	0.160456	0.776842	0.3101	0.936277	0.185971	0.486916	0.264523
324	ADGRE1_Y534_I539V	ADGRE1	Y534	I539V		SDPIIYTLENV	1	0.554447	0.249205	0.682164	0.121923	0.880344	0.210708	0.512262	0.339466
325	ADGRE2_Y670	ADGRE2	Y670			SRPHLYGTPSR	1	1.09219	0.500594	0.82549	0.0628926	1.54156	0.554817	0.937978	0.404754
326	ADGRE2_Y670_S665F	ADGRE2	Y670	S665F		FRPHLYGTPSR	1	1.77499	1.4113	1.64887	0.57454	1.97987	0.311304	1.48205	0.467126
327	ADGRG2_Y285	ADGRG2	Y285			AEPPDYSPVTH	1	0.476893	0.248407	0.610949	0.218811	0.835649	0.254254	0.377959	0.218413
328	ADGRG2_Y285_H290Q	ADGRG2	Y285	H290Q		AEPPDYSPVTQ	1	0.440891	0.14708	0.929933	0.58128	0.819988	0.0771836	0.447428	0.125432
329	ADGRG7_Y760	ADGRG7	Y760			LRVKMYNFLRS	1	1.10463	0.212242	0.622643	0.28548	1.2389	0.732086	0.65628	0.277971
330	ADGRG7_Y760_R756H	ADGRG7	Y760	R756H		LHVKMYNFLRS	1	0.826791	0.292408	1.06925	0.21614	1.27621	0.407021	0.851484	0.523149
331	ADGRL4_Y301	ADGRL4	Y301			AVAFVYYKSIG	2	0.760124	0.215334	0.757899	0.0576387	1.0206	0.314573	0.723904	0.474939
332	ADGRL4_Y301_V300L	ADGRL4	Y301	V300L		AVAFLYYKSIG	2	0.460571	0.163763	0.558787	0.077628	0.722187	0.064572	0.574532	0.103287
333	ADGRL4_Y301_V300L_YF	ADGRL4	Y301	V300L	YF	AVAFLYFKSIG	1	0.569272	0.374536	1.06589	0.392642	0.805848	0.172507	0.624518	0.212589
334	ADGRL4_Y301_YF	ADGRL4	Y301		YF	AVAFVYFKSIG	1	0.628096	0.205187	0.686087	0.144286	0.927579	0.114169	0.594633	0.202043
335	ADGRL4_Y302	ADGRL4	Y302			VAFVYYKSIGP	2	0.574148	0.189596	0.749967	0.385933	0.838081	0.221956	0.513215	0.291681
336	ADGRL4_Y302_V300L	ADGRL4	Y302	V300L		VAFLYYKSIGP	2	0.341209	0.0715778	0.632692	0.192862	0.770904	0.19825	0.490426	0.258344
337	ADGRL4_Y302_V300L_YF	ADGRL4	Y302	V300L	YF	VAFLFYKSIGP	1	0.300798	0.200739	0.45668	0.124182	0.542193	0.140539	0.355471	0.105657
338	ADGRL4_Y302_YF	ADGRL4	Y302		YF	VAFVFYKSIGP	1	0.552506	0.110446	0.874326	0.299398	0.8966	0.12243	0.552263	0.315648
339	ADM_Y52	ADM	Y52			RMSSSYPTGLA	1	0.422301	0.0970615	0.406225	0.114839	0.71425	0.0895658	0.411272	0.251407
340	ADM_Y52_S50R	ADM	Y52	S50R		RMSRSYPTGLA	1	0.424961	0.195643	0.547711	0.203484	0.721458	0.146196	0.340977	0.234507
341	ADPRS_Y75	ADPRS	Y75			TEALYYTDDTA	2	0.856201	0.338006	0.847431	0.516784	0.911529	0.259745	1.58402	1.35929
342	ADPRS_Y75_T79P	ADPRS	Y75	T79P		TEALYYTDDPA	2	0.796509	0.298894	0.480137	0.226281	0.512847	0.193509	0.97379	0.59515
343	ADPRS_Y75_T79P_YF	ADPRS	Y75	T79P	YF	TEALFYTDDPA	1	0.626173	0.125046	0.39708	0.154446	0.636107	0.0311277	0.690034	0.278947
344	ADPRS_Y75_YF	ADPRS	Y75		YF	TEALFYTDDTA	1	0.61499	0.00503223	0.675432	0.295538	0.738686	0.391659	0.602688	0.0843685
345	ADRB2_Y219	ADRB2	Y219			IMVFVYSRVFQ	1	0.590948	0.115609	0.793634	0.121594	1.11786	0.355398	0.789769	0.45345
346	ADRB2_Y219_S220C	ADRB2	Y219	S220C		IMVFVYCRVFQ	1	0.768026	0.315937	1.10245	0.283735	1.41308	0.648794	0.928047	0.60332
347	ADSL_Y432	ADSL	Y432			IQVDAYFSPIH	1	0.603817	0.0457437	0.5289	0.286241	0.796845	0.246473	3.34981	2.61451
348	ADSL_Y432_D430N	ADSL	Y432	D430N		IQVNAYFSPIH	1	0.959485	0.216778	1.34072	0.221584	0.963809	0.0351591	3.11209	1.47951
349	AFG3L2_Y614	AFG3L2	Y614			LPKEQYLYTKE	2	0.59689	0.125453	0.643488	0.317248	0.750496	0.268489	1.24972	0.510022
350	AFG3L2_Y614_Y616C	AFG3L2	Y614	Y616C		LPKEQYLCTKE	1	0.583933	0.275589	0.533288	0.129538	0.882806	0.304172	0.590291	0.132574
351	AFG3L2_Y614_YF	AFG3L2	Y614		YF	LPKEQYLFTKE	1	0.761888	0.145767	1.06456	0.820384	0.91118	0.200752	0.841477	0.347768
352	AGXT_Y194	AGXT	Y194			GGTPLYMDRQG	1	0.448461	0.106446	0.68515	0.0304953	0.759597	0.101435	2.11377	1.87982
353	AGXT_Y194_G190R	AGXT	Y194	G190R		GRTPLYMDRQG	1	0.542258	0.175894	1.11965	0.266505	0.890913	0.0690917	1.52516	0.904825
354	AGXT_Y194_M195R	AGXT	Y194	M195R		GGTPLYRDRQG	1	0.388587	0.183535	0.779527	0.0986275	0.870443	0.0720114	0.493239	0.253762
355	AGXT_Y231	AGXT	Y231			AKKKMYSRKTK	1	0.409282	0.351285	0.488132	0.114281	0.637993	0.399307	0.258549	0.141376
356	AGXT_Y231_R233C	AGXT	Y231	R233C		AKKKMYSCKTK	1	1.20071	1.0083	1.58946	0.7992	1.43646	0.275214	1.15703	0.0695577
357	AGXT_Y231_R233H	AGXT	Y231	R233H		AKKKMYSHKTK	1	1.33934	0.956683	1.41643	0.849739	1.44336	0.37312	0.945331	0.253714
358	AGXT_Y231_R233L	AGXT	Y231	R233L		AKKKMYSLKTK	1	1.5401	1.16294	1.50911	0.988161	1.19502	0.18066	0.865926	0.268793
359	AGXT_Y297	AGXT	Y297			REAAAYLHGRL	1	0.557376	0.179589	1.02838	0.303483	0.956222	0.131853	0.86398	0.228215
360	AGXT_Y297_A295T	AGXT	Y297	A295T		REATAYLHGRL	1	0.482585	0.0386949	0.571222	0.371853	0.794351	0.0813783	0.75144	0.209917
361	AGXT_Y297_L298P	AGXT	Y297	L298P		REAAAYPHGRL	1	0.550078	0.204274	0.738992	0.453832	0.989259	0.191502	0.58452	0.378205
362	AHCY_Y143	AHCY	Y143			LIHTKYPQLLP	1	0.419963	0.212865	0.725123	0.430635	0.540018	0.0846639	0.384209	0.211265
363	AHCY_Y143_Y143C	AHCY	Y143	Y143C		LIHTKCPQLLP	0	0.713509	0.0632916	0.762221	0.102814	0.941076	0.282832	0.621414	0.248734
364	AHNAK_Y964	AHNAK	Y964			KVKGEYDMTVP	1	0.499031	0.122576	0.692113	0.251878	0.755587	0.167266	0.9533	0.15339
365	AHNAK_Y964_G962V	AHNAK	Y964	G962V		KVKVEYDMTVP	1	0.790182	0.0865645	0.659132	0.398517	0.838038	0.217283	1.28963	0.0450966
366	AHSG_Y314	AHSG	Y314			LHRAHYDLRHT	1	1.192	0.911794	1.59611	0.266724	1.82777	0.407949	1.46705	0.751707
367	AHSG_Y314_R317C	AHSG	Y314	R317C		LHRAHYDLCHT	1	2.25383	0.372928	0.934718	0.122714	1.12961	0.1058	0.851805	0.110104
368	AHSG_Y314_R317H	AHSG	Y314	R317H		LHRAHYDLHHT	1	1.86121	1.78826	1.91562	0.948763	1.94716	0.624667	1.39804	0.465445
369	AICDA_Y146	AICDA	Y146			FKDYFYCWNTF	2	0.4735	0.0861665	0.662203	0.28341	0.877638	0.108611	0.723483	0.0777448
370	AICDA_Y146_F151S	AICDA	Y146	F151S		FKDYFYCWNTS	2	0.375486	0.0473777	0.541644	0.198298	0.730079	0.195303	0.615172	0.0591887
371	AICDA_Y146_F151S_YF	AICDA	Y146	F151S	YF	FKDFFYCWNTS	1	0.590045	0.0489408	0.689128	0.29804	0.814844	0.102763	0.611137	0.132417
372	AICDA_Y146_YF	AICDA	Y146		YF	FKDFFYCWNTF	1	0.422945	0.0471287	0.631158	0.220386	0.695592	0.0652616	0.53288	0.196023
373	AIFM1_Y347	AIFM1	Y347			KILPEYLSNWT	1	0.69149	0.0584598	0.872754	0.0883489	1.02704	0.357794	1.2288	0.777964
374	AIFM1_Y347_L344F	AIFM1	Y347	L344F		KIFPEYLSNWT	1	0.627672	0.207281	0.613717	0.21283	0.944177	0.123968	1.0081	0.359917
375	AIPL1_Y267	AIPL1	Y267			GIVKAYYVRAR	2	0.464026	0.200716	0.50196	0.31256	0.858324	0.112352	0.423529	0.231129
376	AIPL1_Y267_R270H	AIPL1	Y267	R270H		GIVKAYYVHAR	2	0.981777	0.221308	1.05139	0.17347	1.22617	0.304767	1.34297	0.413649
377	AIPL1_Y267_R270H_YF	AIPL1	Y267	R270H	YF	GIVKAYFVHAR	1	1.01384	0.290556	1.70662	0.413349	1.30256	0.443841	1.17365	0.251191
378	AIPL1_Y267_YF	AIPL1	Y267		YF	GIVKAYFVRAR	1	0.506155	0.327659	0.756124	0.203956	0.825638	0.26999	0.368617	0.22052
379	AIPL1_Y268	AIPL1	Y268			IVKAYYVRARA	2	0.521323	0.260309	0.922671	0.401794	0.975627	0.100395	0.494538	0.316577
380	AIPL1_Y268_R270H	AIPL1	Y268	R270H		IVKAYYVHARA	2	0.8228	0.269576	1.95195	0.472512	1.24498	0.251538	1.2256	0.407053
381	AIPL1_Y268_R270H_YF	AIPL1	Y268	R270H	YF	IVKAFYVHARA	1	0.78086	0.256703	1.52784	0.731588	1.36104	0.197126	0.720205	0.394207
382	AIPL1_Y268_YF	AIPL1	Y268		YF	IVKAFYVRARA	1	0.600891	0.0697957	1.20227	0.765867	0.871683	0.0931483	0.37653	0.200581
383	AK7_Y390	AK7	Y390			KELANYYKLHH	2	0.697288	0.0890482	0.621642	0.2997	0.825337	0.102095	1.9657	0.287596
384	AK7_Y390_N389K	AK7	Y390	N389K		KELAKYYKLHH	2	0.781528	0.23296	0.621639	0.16255	1.00624	0.18411	0.786457	0.343934
385	AK7_Y390_N389K_YF	AK7	Y390	N389K	YF	KELAKYFKLHH	1	0.497144	0.0733296	0.635499	0.146388	0.759392	0.194734	0.406153	0.246319
386	AK7_Y390_YF	AK7	Y390		YF	KELANYFKLHH	1	0.51614	0.041306	0.948633	0.0535089	0.944745	0.360146	1.62125	0.309571
387	AK7_Y391	AK7	Y391			ELANYYKLHHI	2	0.473573	0.159489	0.940614	0.27975	0.704617	0.155833	1.402	0.312929
388	AK7_Y391_N389K	AK7	Y391	N389K		ELAKYYKLHHI	2	0.748298	0.230577	0.930003	0.130486	0.961133	0.296916	0.797286	0.243533
389	AK7_Y391_N389K_YF	AK7	Y391	N389K	YF	ELAKFYKLHHI	1	0.413942	0.0775951	0.746812	0.132579	0.645631	0.20528	0.378411	0.198169
390	AK7_Y391_YF	AK7	Y391		YF	ELANFYKLHHI	1	0.480684	0.182188	1.01394	0.365207	0.900704	0.390768	0.785782	0.177778
391	AKAP4_Y554	AKAP4	Y554			LKLIQYHLTQQ	1	0.76234	0.413929	1.31236	0.244073	1.03253	0.30597	0.787861	0.41001
392	AKAP4_Y554_T557I	AKAP4	Y554	T557I		LKLIQYHLIQQ	1	2.2155	0.237603	4.15446	0.731911	1.51541	0.21101	1.54498	0.486955
393	AKAP9_Y2482	AKAP9	Y2482			LENQTYFKSFE	1	0.569116	0.195923	0.517636	0.369808	0.977832	0.0647145	1.13016	0.320501
394	AKAP9_Y2482_K2484R	AKAP9	Y2482	K2484R		LENQTYFRSFE	1	0.623531	0.276233	0.545835	0.306907	0.802657	0.272599	1.30984	0.70679
395	AKR1A1_Y50	AKR1A1	Y50			DCAAIYGNEPE	1	0.719689	0.183752	0.688517	0.407554	0.966047	0.240824	0.471144	0.234145
396	AKR1A1_Y50_E55D	AKR1A1	Y50	E55D		DCAAIYGNEPD	1	0.982233	0.137591	0.812709	0.46297	1.11261	0.0983862	0.654784	0.283778
397	AKR1A1_Y50_N52S	AKR1A1	Y50	N52S		DCAAIYGSEPE	1	0.633371	0.0745279	0.552622	0.25784	0.927434	0.143195	0.591551	0.178134
398	AKR1B1_Y199	AKR1B1	Y199			EKLIQYCQSKG	1	0.571762	0.0371158	0.466329	0.13874	0.853849	0.229393	0.408715	0.179408
399	AKR1B1_Y199_G204S	AKR1B1	Y199	G204S		EKLIQYCQSKS	1	0.608765	0.246978	0.754822	0.263425	0.964456	0.443056	0.706315	0.173415
400	AKR1B1_Y40	AKR1B1	Y40			AIDVGYRHIDC	1	0.979809	0.264076	1.12237	0.68216	1.04402	0.220246	0.694372	0.269981
401	AKR1B1_Y40_H42L	AKR1B1	Y40	H42L		AIDVGYRLIDC	1	2.01499	0.406306	0.700154	0.326395	0.992989	0.129578	1.03038	0.0367947
402	AKR1B10_Y310	AKR1B10	Y310			SHLEDYPFNAE	1	0.403852	0.151934	0.573433	0.336126	0.92815	0.131207	0.459408	0.268665
403	AKR1B10_Y310_N313D	AKR1B10	Y310	N313D		SHLEDYPFDAE	1	0.471057	0.110708	0.842112	0.341249	0.746399	0.143851	0.510599	0.233489
404	AKR1B10_Y316	AKR1B10	Y316			PFNAEYGGGGG	1	0.37915	0.344809	0.416609	0.392903	0.554054	0.41313	0.8091	0.184239
405	AKR1B10_Y316_N313D	AKR1B10	Y316	N313D		PFDAEYGGGGG	1	0.377584	0.117726	0.798396	0.14609	0.747169	0.205209	0.589182	0.256452
406	AKR1C2_Y305	AKR1C2	Y305			NRNVRYLTLDI	1	1.9582	0.312082	6.7544	1.24911	1.02755	0.088943	0.701908	0.295951
407	AKR1C2_Y305_N300T	AKR1C2	Y305	N300T		TRNVRYLTLDI	1	1.72626	0.323139	6.49103	2.19587	0.984891	0.13954	0.59034	0.218412
408	AKR1C2_Y81	AKR1C2	Y81			REDIFYTSKLW	1	0.598082	0.219215	0.838	0.316129	1.0387	0.279716	1.00904	0.213787
409	AKR1C2_Y81_I79V	AKR1C2	Y81	I79V		REDVFYTSKLW	1	0.51089	0.134008	0.729193	0.506324	0.807312	0.0581897	1.1592	0.238683
410	AKR1C3_Y81_E77G	AKR1C3	Y81	E77G		RGDIFYTSKLW	1	0.550424	0.292433	0.887926	0.366244	0.918981	0.0756383	1.05298	0.276204
411	AKR1D1_Y199	AKR1D1	Y199			VECHPYFTQPK	1	0.443813	0.0816956	0.636964	0.104246	0.764585	0.164964	1.87195	0.360616
412	AKR1D1_Y199_P198L	AKR1D1	Y199	P198L		VECHLYFTQPK	1	0.374307	0.0537689	0.867145	0.254436	0.800912	0.159161	0.700814	0.11608
413	AKT1_Y437	AKT1	Y437			ETDTRYFDEEF	1	0.775045	0.460858	0.915832	0.53965	0.902125	0.25504	0.852652	0.416655
414	AKT1_Y437_T435P	AKT1	Y437	T435P		ETDPRYFDEEF	1	0.507419	0.0844925	0.501102	0.264585	0.945609	0.187398	0.662995	0.330729
415	AKT3_Y173	AKT3	Y173			KASGKYYAMKI	2	1.44592	0.772807	1.21163	0.288717	1.37733	0.443552	1.08234	0.200284
416	AKT3_Y173_G171R	AKT3	Y173	G171R		KASRKYYAMKI	2	0.652417	0.176303	0.789667	0.229335	1.02861	0.417737	0.408879	0.218466
417	AKT3_Y173_G171R_YF	AKT3	Y173	G171R	YF	KASRKYFAMKI	1	0.471984	0.146634	0.666082	0.165955	0.795798	0.210491	0.389292	0.201168
418	AKT3_Y173_YF	AKT3	Y173		YF	KASGKYFAMKI	1	1.21337	0.715154	1.45181	0.627178	1.37254	0.0630088	1.00313	0.315476
419	AKT3_Y174	AKT3	Y174			ASGKYYAMKIL	2	1.42799	0.751998	0.940531	0.330088	0.956644	0.158329	1.39154	0.308433
420	AKT3_Y174_G171R	AKT3	Y174	G171R		ASRKYYAMKIL	2	1.18291	0.580008	1.13463	0.0810479	1.09795	0.350289	0.587854	0.270394
421	AKT3_Y174_G171R_YF	AKT3	Y174	G171R	YF	ASRKFYAMKIL	1	0.543267	0.137665	0.678778	0.626161	0.816762	0.0402356	0.416451	0.287358
422	AKT3_Y174_YF	AKT3	Y174		YF	ASGKFYAMKIL	1	0.763443	0.164615	1.05032	0.20394	1.00432	0.239931	0.746682	0.334795
423	ALAS2_Y199	ALAS2	Y199			WCSNDYLGMSR	1	0.641865	0.106489	0.773423	0.354478	0.894781	0.235518	2.31774	1.46746
424	ALAS2_Y199_R204Q	ALAS2	Y199	R204Q		WCSNDYLGMSQ	1	0.716685	0.227504	0.737582	0.231203	1.10166	0.38621	1.82132	0.976209
425	ALAS2_Y199_Y199H	ALAS2	Y199	Y199H		WCSNDHLGMSR	0	0.684297	0.238554	0.810674	0.248882	0.800532	0.448084	0.605228	0.350983
426	ALB_Y108	ALB	Y108			TLRETYGEMAD	1	0.910236	0.824686	0.578941	0.180283	1.11247	0.314562	0.475115	0.151837
427	ALB_Y108_E106K	ALB	Y108	E106K		TLRKTYGEMAD	1	0.449082	0.191269	0.536838	0.126643	0.787513	0.0823678	0.522999	0.263553
428	ALB_Y172	ALB	Y172			ARRHPYFYAPE	2	0.29958	0.169327	0.470391	0.491108	0.610226	0.309033	0.390348	0.239843
429	ALB_Y172_Y174F	ALB	Y172	Y174F		ARRHPYFFAPE	1	0.524738	0.199025	0.565633	0.198931	0.820573	0.248489	0.48065	0.232792
430	ALB_Y174	ALB	Y174			RHPYFYAPELL	2	0.795856	0.0726469	0.891063	0.189831	1.3359	0.351474	5.16497	1.56734
431	ALB_Y174_Y174F	ALB	Y174	Y174F		RHPYFFAPELL	1	0.954266	0.465203	1.01161	0.333044	1.22273	0.392879	5.27702	2.13678
432	ALB_Y174_Y174F_YF	ALB	Y174	Y174F	YF	RHPFFFAPELL	0	1.04689	0.124455	1.43728	0.18646	1.341	0.416969	0.893117	0.412496
433	ALB_Y174_YF	ALB	Y174		YF	RHPFFYAPELL	1	0.988045	0.14057	1.13644	0.378648	1.33635	0.228179	0.860348	0.186829
434	ALB_Y287	ALB	Y287			ADLAKYICENQ	1	0.606684	0.337172	0.754266	0.308746	0.867624	0.203922	0.701769	0.156731
435	ALB_Y287_Q292R	ALB	Y287	Q292R		ADLAKYICENR	1	0.424313	0.119591	0.790471	0.528792	0.816837	0.119043	0.62711	0.276876
436	ALB_Y343	ALB	Y343			DVCKNYAEAKD	1	1.02076	0.305281	0.618108	0.265583	0.739339	0.248263	0.572468	0.18616
437	ALB_Y343_A344T	ALB	Y343	A344T		DVCKNYTEAKD	1	0.806687	0.0482013	0.674314	0.195162	0.824168	0.377627	0.549161	0.257763
438	ALB_Y343_D338G	ALB	Y343	D338G		GVCKNYAEAKD	1	0.825028	0.151788	0.704812	0.419694	0.885524	0.29333	0.591324	0.309666
439	ALB_Y343_D338V	ALB	Y343	D338V		VVCKNYAEAKD	1	0.647024	0.11623	0.807448	0.236569	0.852197	0.163446	0.590857	0.276842
440	ALB_Y343_E345K	ALB	Y343	E345K		DVCKNYAKAKD	1	0.558773	0.175272	0.956392	0.549651	1.03294	0.0279161	0.604777	0.368329
441	ALB_Y343_N342K	ALB	Y343	N342K		DVCKKYAEAKD	1	0.561599	0.186686	0.431429	0.190614	0.756533	0.150941	0.451429	0.208972
442	ALB_Y377	ALB	Y377			RLAKTYETTLE	1	0.472866	0.128541	0.56851	0.153765	0.833846	0.0844564	0.559581	0.23911
443	ALB_Y377_E378K	ALB	Y377	E378K		RLAKTYKTTLE	1	0.672158	0.780819	0.668787	0.473636	1.01041	0.221283	0.370115	0.297209
444	ALB_Y377_E382K	ALB	Y377	E382K		RLAKTYETTLK	1	0.557156	0.142664	0.555629	0.338939	0.808533	0.181885	0.486708	0.235885
445	ALB_Y394	ALB	Y394			DPHECYAKVFD	1	3.01857	1.38628	1.32101	0.220693	0.986631	0.0691692	0.607517	0.190179
446	ALB_Y394_D389H	ALB	Y394	D389H		HPHECYAKVFD	1	3.07429	1.93726	2.66621	2.18493	0.943843	0.234979	0.602048	0.12151
447	ALB_Y394_D389V	ALB	Y394	D389V		VPHECYAKVFD	1	2.33277	1.03285	1.54693	0.551821	0.887252	0.098739	0.612379	0.222964
448	ALB_Y394_D399N	ALB	Y394	D399N		DPHECYAKVFN	1	1.39706	0.472688	1.81545	0.604919	1.11515	0.349607	0.647821	0.274566
449	ALB_Y394_K396E	ALB	Y394	K396E		DPHECYAEVFD	1	1.2333	0.251057	0.954386	0.073813	1.10333	0.158966	0.524815	0.226454
450	ALB_Y425	ALB	Y425			EQLGEYKFQNA	1	0.517987	0.182396	0.416147	0.319365	0.793498	0.218433	0.91503	0.283382
451	ALB_Y425_E420K	ALB	Y425	E420K		KQLGEYKFQNA	1	0.565048	0.179736	1.04241	0.168483	0.897204	0.0524915	0.748877	0.113697
452	ALB_Y521	ALB	Y521			EVDETYVPKEF	1	0.498354	0.231321	0.651417	0.386757	0.881416	0.293371	0.483767	0.330066
453	ALB_Y521_D518N	ALB	Y521	D518N		EVNETYVPKEF	1	0.404296	0.131871	0.500872	0.0681912	0.759062	0.0401834	0.414377	0.21009
454	ALB_Y521_E525K	ALB	Y521	E525K		EVDETYVPKKF	1	0.613139	0.450874	0.775043	0.524783	1.06088	0.333328	0.501565	0.348118
455	ALCAM_Y298	ALCAM	Y298			RSSNTYTLTDV	1	1.19006	0.296108	0.688977	0.382597	0.820326	0.111363	1.20041	0.141264
456	ALCAM_Y298_T301M	ALCAM	Y298	T301M		RSSNTYTLMDV	1	6.21123	1.75207	0.699802	0.274661	0.780307	0.32784	0.798592	0.2714
457	ALDH1A1_Y119	ALDH1A1	Y119			LYSNAYLNDLA	2	1.84274	0.235177	0.612627	0.11268	4.67755	3.33159	1.21217	0.695798
458	ALDH1A1_Y119_N121S	ALDH1A1	Y119	N121S		LYSNAYLSDLA	2	1.10938	0.460928	0.782078	0.150572	0.939851	0.310333	2.21423	1.56363
459	ALDH1A1_Y119_N121S_YF	ALDH1A1	Y119	N121S	YF	LFSNAYLSDLA	1	0.360041	0.187321	0.601078	0.483194	0.782689	0.270749	0.669788	0.0953637
460	ALDH1A1_Y119_YF	ALDH1A1	Y119		YF	LFSNAYLNDLA	1	1.28704	0.108051	0.627293	0.182917	4.23021	2.46845	0.913655	0.336692
461	ALDH1A3_Y492	ALDH1A3	Y492			RELGEYALAEY	2	1.1748	0.338609	0.691146	0.275918	0.70723	0.0909973	0.64865	0.09492
462	ALDH1A3_Y492_A493P	ALDH1A3	Y492	A493P		RELGEYPLAEY	2	2.45917	0.453686	0.290632	0.221484	0.795038	0.170382	0.593925	0.0473388
463	ALDH1A3_Y492_A493P_YF	ALDH1A3	Y492	A493P	YF	RELGEYPLAEF	1	2.12906	0.963916	0.617161	0.34135	0.763196	0.1899	0.476496	0.212013
464	ALDH1A3_Y492_YF	ALDH1A3	Y492		YF	RELGEYALAEF	1	0.929681	0.702598	0.411375	0.0688084	0.683907	0.148498	0.33928	0.203845
465	ALDH1A3_Y497	ALDH1A3	Y497			YALAEYTEVKT	2	5.59072	0.340873	4.27125	5.80219	0.659968	0.206314	1.43158	0.607993
466	ALDH1A3_Y497_A493P	ALDH1A3	Y497	A493P		YPLAEYTEVKT	2	1.7795	0.443327	0.868677	0.242456	1.2172	0.198032	0.721806	0.362632
467	ALDH1A3_Y497_A493P_YF	ALDH1A3	Y497	A493P	YF	FPLAEYTEVKT	1	1.87178	0.906387	0.841322	0.245789	0.884377	0.216489	0.513099	0.298487
468	ALDH1A3_Y497_YF	ALDH1A3	Y497		YF	FALAEYTEVKT	1	1.90275	0.758286	0.50561	0.390234	0.860588	0.150297	0.5493	0.510747
469	ALDH2_Y332	ALDH2	Y332			VQEDIYDEFVE	1	0.436673	0.0921419	0.408168	0.039019	0.751907	0.21499	0.379136	0.143073
470	ALDH2_Y332_E337V	ALDH2	Y332	E337V		VQEDIYDEFVV	1	0.495319	0.206949	0.821812	0.312045	0.824331	0.0225404	0.591038	0.341391
471	ALDH2_Y497	ALDH2	Y497			RELGEYGLQAY	2	0.450916	0.152803	0.748563	0.0912826	0.744758	0.374862	0.995972	0.336946
472	ALDH2_Y497_E496K	ALDH2	Y497	E496K		RELGKYGLQAY	2	0.454968	0.358592	0.564274	0.446231	1.14776	0.236032	0.657525	0.388694
473	ALDH2_Y497_E496K_YF	ALDH2	Y497	E496K	YF	RELGKYGLQAF	1	0.438044	0.158014	0.502995	0.308771	0.83381	0.127792	0.552866	0.280626
474	ALDH2_Y497_YF	ALDH2	Y497		YF	RELGEYGLQAF	1	0.758478	0.536528	1.04331	0.360378	1.14695	0.216355	0.584535	0.336696
475	ALDH2_Y502	ALDH2	Y502			YGLQAYTEVKT	2	6.94492	0.334302	2.37933	0.939704	0.983909	0.0851758	2.86017	1.39692
476	ALDH2_Y502_E504K	ALDH2	Y502	E504K		YGLQAYTKVKT	2	1.85406	0.174075	2.66688	1.22561	0.81088	0.0655059	1.54515	0.470811
477	ALDH2_Y502_E504K_YF	ALDH2	Y502	E504K	YF	FGLQAYTKVKT	1	1.38121	0.457282	1.65445	0.375413	0.743524	0.325278	0.913105	0.117149
478	ALDH2_Y502_YF	ALDH2	Y502		YF	FGLQAYTEVKT	1	7.16652	2.91595	2.51748	0.873924	0.869487	0.242572	2.01785	1.56567
479	ALDH3A1_Y272	ALDH3A1	Y272			SLKEFYGEDAK	1	0.511217	0.196681	0.599419	0.126213	0.915882	0.0492993	0.472061	0.279108
480	ALDH3A1_Y272_E270A	ALDH3A1	Y272	E270A		SLKAFYGEDAK	1	0.679554	0.184987	0.663458	0.314336	0.890664	0.305937	0.66823	0.541776
481	ALDH3A1_Y305	ALDH3A1	Y305			GQKVAYGGTGD	1	0.479921	0.163358	0.607559	0.377855	0.755889	0.0939131	0.441327	0.251912
482	ALDH3A1_Y305_G309E	ALDH3A1	Y305	G309E		GQKVAYGGTED	1	0.470515	0.165051	0.549213	0.338726	0.787655	0.0588001	0.430387	0.253047
483	ALDH3B2_Y362	ALDH3B2	Y362			LKEIHYPPYTD	2	0.654154	0.392419	0.975261	0.240097	0.896412	0.352142	1.65644	0.0984507
484	ALDH3B2_Y362_H361R	ALDH3B2	Y362	H361R		LKEIRYPPYTD	2	0.554791	0.195107	0.729076	0.153477	0.882904	0.572397	0.783506	0.373261
485	ALDH3B2_Y362_H361R_YF	ALDH3B2	Y362	H361R	YF	LKEIRYPPFTD	1	0.605123	0.131111	0.679777	0.464605	0.798061	0.376789	0.642227	0.515961
486	ALDH3B2_Y362_YF	ALDH3B2	Y362		YF	LKEIHYPPFTD	1	0.505356	0.179424	0.643692	0.18452	0.921651	0.263317	0.508105	0.296298
487	ALDH3B2_Y365	ALDH3B2	Y365			IHYPPYTDWNQ	2	1.24524	0.85707	0.710429	0.0967146	0.883271	0.236253	5.00513	1.53031
488	ALDH3B2_Y365_H361R	ALDH3B2	Y365	H361R		IRYPPYTDWNQ	2	0.766868	0.355681	0.760162	0.19278	0.760061	0.222581	2.52943	0.245565
489	ALDH3B2_Y365_H361R_YF	ALDH3B2	Y365	H361R	YF	IRFPPYTDWNQ	1	0.768361	0.398477	0.747683	0.238689	0.886209	0.240487	2.61478	0.205683
490	ALDH3B2_Y365_YF	ALDH3B2	Y365		YF	IHFPPYTDWNQ	1	0.820878	0.256912	0.736204	0.295042	0.97913	0.215812	5.07118	2.16533
491	ALDH5A1_Y175	ALDH5A1	Y175			EARRVYGDIIH	1	0.445304	0.112069	0.560664	0.0794754	0.977198	0.0779697	0.525241	0.348561
492	ALDH5A1_Y175_G176R	ALDH5A1	Y175	G176R		EARRVYRDIIH	1	0.512973	0.0992659	0.749697	0.197944	0.928475	0.0761423	0.441274	0.220157
493	ALDH5A1_Y175_H180Y	ALDH5A1	Y175	H180Y		EARRVYGDIIY	2	0.503617	0.0594973	0.604261	0.199054	0.80521	0.141808	0.581014	0.299314
494	ALDH5A1_Y175_H180Y_YF	ALDH5A1	Y175	H180Y	YF	EARRVYGDIIF	1	0.485186	0.131377	0.688936	0.0812808	0.817985	0.240076	0.569207	0.277786
495	ALDOA_Y138	ALDOA	Y138			ERCAQYKKDGA	1	0.634851	0.349233	0.622746	0.398757	1.0622	0.0914586	0.420737	0.275024
496	ALDOA_Y138_G142V	ALDOA	Y138	G142V		ERCAQYKKDVA	1	0.585006	0.0779386	0.976289	0.160622	1.07352	0.335337	0.599514	0.280695
497	ALDOA_Y204	ALDOA	Y204			LKRCQYVTEKV	1	0.529751	0.0683167	0.654204	0.30349	0.741611	0.454516	0.40496	0.184458
498	ALDOA_Y204_E207K	ALDOA	Y204	E207K		LKRCQYVTKKV	1	0.787593	0.389853	1.01623	0.495129	0.945739	0.32264	0.7774	0.628246
499	ALDOA_Y343	ALDOA	Y343			ACQGKYTPSGQ	1	0.551244	0.216305	0.749699	0.228415	0.843362	0.260942	0.527873	0.239474
500	ALDOA_Y343_C339Y	ALDOA	Y343	C339Y		AYQGKYTPSGQ	2	0.622188	0.267691	0.638753	0.277267	0.939387	0.100169	0.594657	0.188246
501	ALDOA_Y343_C339Y_YF	ALDOA	Y343	C339Y	YF	AFQGKYTPSGQ	1	0.591817	0.310115	0.803315	0.0926783	0.758855	0.177635	0.501644	0.322573
502	ALDOA_Y343_G347S	ALDOA	Y343	G347S		ACQGKYTPSSQ	1	0.553395	0.211426	0.887329	0.485378	0.92841	0.108813	0.524433	0.288674
503	ALDOB_Y204	ALDOB	Y204			LEHCQYVTEKV	1	0.743993	0.162124	0.821245	0.127579	0.75565	0.479315	0.75568	0.105293
504	ALDOB_Y204_E207Q	ALDOB	Y204	E207Q		LEHCQYVTQKV	1	0.731419	0.142933	1.17809	0.200353	0.957194	0.400154	1.04955	0.214001
505	ALDOB_Y223	ALDOB	Y223			NDHHVYLEGTL	1	1.71873	0.147593	0.646226	0.138798	0.994683	0.19602	0.495122	0.214088
506	ALDOB_Y223_V222F	ALDOB	Y223	V222F		NDHHFYLEGTL	1	0.669738	0.259195	0.744605	0.102048	0.786951	0.0923875	0.478421	0.128458
507	ALDOB_Y302	ALDOB	Y302			KLSFSYGRALQ	1	0.591916	0.201496	0.955225	0.185646	1.04136	0.196022	0.734068	0.30961
508	ALDOB_Y302_R304Q	ALDOB	Y302	R304Q		KLSFSYGQALQ	1	0.474981	0.128123	0.703471	0.13435	0.860616	0.196435	0.524139	0.128337
509	ALDOB_Y302_R304W	ALDOB	Y302	R304W		KLSFSYGWALQ	1	0.558301	0.126533	0.670162	0.0821826	0.921144	0.155533	0.759211	0.102684
510	ALK_Y1092	ALK	Y1092			TIMTDYNPNYC	2	0.662677	0.160779	0.653645	0.221865	1.11113	0.17549	1.72241	1.06503
511	ALK_Y1092_D1091N	ALK	Y1092	D1091N		TIMTNYNPNYC	2	0.590669	0.151544	0.714742	0.348602	1.11942	0.343206	1.35476	0.269574
512	ALK_Y1092_D1091N_YF	ALK	Y1092	D1091N	YF	TIMTNYNPNFC	1	0.4777	0.194796	0.531071	0.529835	0.774969	0.174517	0.686667	0.0639276
513	ALK_Y1092_YF	ALK	Y1092		YF	TIMTDYNPNFC	1	0.632716	0.244524	0.674212	0.233192	0.999357	0.106504	0.938833	0.180297
514	ALK_Y1096	ALK	Y1096			DYNPNYCFAGK	2	0.531844	0.0852699	0.788466	0.181699	0.798653	0.129205	1.13122	0.605435
515	ALK_Y1096_D1091N	ALK	Y1096	D1091N		NYNPNYCFAGK	2	0.549695	0.138282	0.877508	0.266419	0.868409	0.222355	1.12698	0.395956
516	ALK_Y1096_D1091N_YF	ALK	Y1096	D1091N	YF	NFNPNYCFAGK	1	0.68122	0.090682	0.881421	0.0807942	0.875545	0.0891397	0.840956	0.102469
517	ALK_Y1096_YF	ALK	Y1096		YF	DFNPNYCFAGK	1	0.532912	0.177995	0.625498	0.0828816	0.792203	0.295755	0.698868	0.148922
518	ALK_Y1131	ALK	Y1131			AFGEVYEGQVS	1	0.498522	0.343754	0.456351	0.208103	0.913724	0.21357	0.513615	0.197251
519	ALK_Y1131_G1128A	ALK	Y1131	G1128A		AFAEVYEGQVS	1	0.506368	0.0854306	0.768679	0.326591	0.888114	0.211265	0.591741	0.248251
520	ALK_Y1131_V1135E	ALK	Y1131	V1135E		AFGEVYEGQES	1	0.557415	0.265061	0.677483	0.403684	0.841764	0.150813	0.521909	0.254757
521	ALK_Y1278	ALK	Y1278			MARDIYRASYY	3	0.838599	0.137439	0.708214	0.159322	0.876664	0.163768	5.26093	2.25916
522	ALK_Y1278_A1274T	ALK	Y1278	A1274T		MTRDIYRASYY	3	0.78575	0.16352	0.703935	0.0532546	0.876208	0.0967285	5.78859	2.30023
523	ALK_Y1278_A1274T_YF	ALK	Y1278	A1274T	YF	MTRDIYRASFF	1	0.529039	0.0103878	0.56285	0.133338	0.811461	0.322629	1.07996	0.28568
524	ALK_Y1278_R1275L	ALK	Y1278	R1275L		MALDIYRASYY	3	1.18641	0.273897	0.900497	0.114482	1.14627	0.11216	6.0815	1.65509
525	ALK_Y1278_R1275L_YF	ALK	Y1278	R1275L	YF	MALDIYRASFF	1	0.517885	0.0304587	0.76771	0.209279	0.803247	0.198463	0.671091	0.245884
526	ALK_Y1278_R1275Q	ALK	Y1278	R1275Q		MAQDIYRASYY	3	0.755194	0.246415	0.729788	0.231803	0.882471	0.207887	5.76975	0.658236
527	ALK_Y1278_R1275Q_YF	ALK	Y1278	R1275Q	YF	MAQDIYRASFF	1	0.455971	0.124592	0.73818	0.239286	1.03577	0.0482258	0.548521	0.304127
528	ALK_Y1278_Y1278S	ALK	Y1278	Y1278S		MARDISRASYY	2	0.43263	0.116095	0.518792	0.1512	0.775548	0.339183	1.56875	0.12288
529	ALK_Y1278_Y1278S_YF	ALK	Y1278	Y1278S	YF	MARDISRASFF	0	0.453604	0.11782	0.715723	0.0933114	1.06361	0.0902779	0.414227	0.201868
530	ALK_Y1278_YF	ALK	Y1278		YF	MARDIYRASFF	1	0.519765	0.142553	0.759724	0.0552399	0.843245	0.283303	0.817463	0.123646
531	ALK_Y1282	ALK	Y1282			IYRASYYRKGG	3	0.528223	0.142139	0.702464	0.0402728	0.825308	0.257389	0.302796	0.198696
532	ALK_Y1282_Y1278S	ALK	Y1282	Y1278S		ISRASYYRKGG	2	0.361704	0.0529905	0.425854	0.0604718	0.655342	0.104769	0.257092	0.182232
533	ALK_Y1282_Y1278S_YF	ALK	Y1282	Y1278S	YF	ISRASYFRKGG	1	0.449964	0.224494	0.483862	0.248724	0.755088	0.27842	0.260258	0.140592
534	ALK_Y1282_YF	ALK	Y1282		YF	IFRASYFRKGG	1	0.460628	0.226243	0.513197	0.272125	0.588754	0.181163	0.356971	0.240296
535	ALK_Y1283	ALK	Y1283			YRASYYRKGGC	3	0.483811	0.251776	0.512351	0.449918	0.690663	0.0873726	0.35463	0.206494
536	ALK_Y1283_Y1278S	ALK	Y1283	Y1278S		SRASYYRKGGC	2	0.607394	0.29448	0.472831	0.131205	0.643512	0.311504	0.258637	0.166711
537	ALK_Y1283_Y1278S_YF	ALK	Y1283	Y1278S	YF	SRASFYRKGGC	1	0.4332	0.117126	0.54827	0.240705	0.674499	0.0816664	0.279507	0.170761
538	ALK_Y1283_YF	ALK	Y1283		YF	FRASFYRKGGC	1	0.499066	0.0899708	0.502105	0.191147	0.616452	0.185397	0.355959	0.227777
539	ALK_Y1604	ALK	Y1604			PGAGHYEDTIL	1	3.03757	0.956353	0.558563	0.279732	0.797009	0.158006	0.532292	0.291591
540	ALK_Y1604_P1599H	ALK	Y1604	P1599H		HGAGHYEDTIL	1	2.80807	0.545341	0.790574	0.0699882	0.775354	0.241299	0.535994	0.12428
541	ALOX12_Y295	ALOX12	Y295			RGEKQYLAAPL	1	0.409286	0.288599	0.431011	0.278774	0.708554	0.288353	0.776428	0.432117
542	ALOX12_Y295_A298T	ALOX12	Y295	A298T		RGEKQYLATPL	1	0.569023	0.173301	0.766256	0.573889	0.784108	0.1996	1.02746	0.386265
543	ALOX12B_Y318	ALOX12B	Y318			IYLADYRIMEG	2	0.719308	0.159648	1.10235	0.130373	0.981653	0.218895	1.81773	0.788863
544	ALOX12B_Y318_Y318C	ALOX12B	Y318	Y318C		IYLADCRIMEG	1	0.449509	0.125569	0.670957	0.420577	0.821312	0.341919	0.5703	0.2025
545	ALOX12B_Y318_Y318C_YF	ALOX12B	Y318	Y318C	YF	IFLADCRIMEG	0	0.461123	0.177658	0.620013	0.175751	0.885676	0.400416	0.527851	0.266405
546	ALOX12B_Y318_YF	ALOX12B	Y318		YF	IFLADYRIMEG	1	0.986982	0.14105	1.12005	0.208183	1.16206	0.341664	1.99189	0.447447
547	ALOX5_Y446	ALOX5	Y446			MKDLTYASLCF	1	0.41062	0.109924	0.736839	0.370914	0.911687	0.10485	0.599585	0.191736
548	ALOX5_Y446_A447S	ALOX5	Y446	A447S		MKDLTYSSLCF	1	0.554689	0.0684982	0.616778	0.0979014	0.756317	0.170982	0.572092	0.24841
549	ALPK2_Y1975	ALPK2	Y1975			LIQRNYKLAAQ	1	0.398794	0.181308	0.648862	0.188723	0.961295	0.105681	0.413593	0.284894
550	ALPK2_Y1975_A1978T	ALPK2	Y1975	A1978T		LIQRNYKLTAQ	1	0.532032	0.235141	0.951886	0.388985	1.2397	0.254464	0.644775	0.468661
551	ALPK3_Y342	ALPK3	Y342			HTLQLYRCREE	1	0.406319	0.132368	0.658454	0.290439	0.671738	0.243984	0.189986	0.104456
552	ALPK3_Y342_T338I	ALPK3	Y342	T338I		HILQLYRCREE	1	0.545744	0.167721	0.748331	0.800419	0.728857	0.325567	0.316301	0.18925
553	ALPL_Y117	ALPL	Y117			GTATAYLCGVK	1	0.431751	0.202473	0.694824	0.436254	0.762569	0.155998	0.698875	0.121385
554	ALPL_Y117_A114G	ALPL	Y117	A114G		GTGTAYLCGVK	1	0.543479	0.156023	0.67872	0.145227	0.901919	0.0924744	0.673223	0.13276
555	ALPL_Y117_A116T	ALPL	Y117	A116T		GTATTYLCGVK	1	0.4832	0.156127	1.15444	0.0497548	0.669609	0.16146	0.699965	0.172584
556	ALPL_Y117_G120R	ALPL	Y117	G120R		GTATAYLCRVK	1	0.524687	0.13927	0.770903	0.297445	1.06974	0.269241	0.735682	0.3161
557	ALX3_Y181	ALX3	Y181			HYPDVYAREQL	2	0.564302	0.287113	0.471245	0.274082	0.802471	0.138374	0.67933	0.0794376
558	ALX3_Y181_R183W	ALX3	Y181	R183W		HYPDVYAWEQL	2	0.722566	0.452947	0.927844	0.341733	0.715613	0.0508341	0.740029	0.245104
559	ALX3_Y181_R183W_YF	ALX3	Y181	R183W	YF	HFPDVYAWEQL	1	0.809385	0.180571	0.661508	0.429685	1.23325	0.203391	0.679861	0.248596
560	ALX3_Y181_YF	ALX3	Y181		YF	HFPDVYAREQL	1	0.559758	0.0865282	0.681783	0.158326	0.83227	0.346027	0.750451	0.203807
561	AMH_Y195	AMH	Y195			SRDTRYLVLAV	1	0.81115	0.235302	2.34272	0.0484241	1.13055	0.511125	1.00499	0.376721
562	AMH_Y195_R194C	AMH	Y195	R194C		SRDTCYLVLAV	1	0.453347	0.212342	0.615756	0.221376	0.752465	0.0981387	0.553057	0.204695
563	AMZ2_Y26	AMZ2	Y26			VLVSQYEKLNA	1	2.71334	0.554764	0.632268	0.205744	0.915371	0.140339	0.729367	0.359688
564	AMZ2_Y26_N30D	AMZ2	Y26	N30D		VLVSQYEKLDA	1	7.26502	1.95378	0.601931	0.394339	0.895504	0.147367	0.746715	0.405256
565	ANAPC4_Y469	ANAPC4	Y469			NRKGKYFNVER	1	0.299431	0.0608376	0.509541	0.17161	0.497869	0.0665903	0.314201	0.148435
566	ANAPC4_Y469_R465Q	ANAPC4	Y469	R465Q		NQKGKYFNVER	1	0.66742	0.194454	1.02569	0.133281	1.14595	0.209215	0.702265	0.134915
567	ANG_Y38	ANG	Y38			FLTQHYDAKPQ	1	0.481249	0.182191	0.639622	0.240285	0.902456	0.22719	0.739001	0.20485
568	ANG_Y38_K41E	ANG	Y38	K41E		FLTQHYDAEPQ	1	0.612105	0.157533	0.635495	0.1497	0.991829	0.215688	0.815669	0.191596
569	ANG_Y38_K41I	ANG	Y38	K41I		FLTQHYDAIPQ	1	13.9048	2.31725	0.926607	0.239656	0.809007	0.148375	1.87719	0.327594
570	ANG_Y38_Q36L	ANG	Y38	Q36L		FLTLHYDAKPQ	1	0.652539	0.188017	0.843964	0.149636	0.78293	0.274794	0.96879	0.0933217
571	ANG_Y38_Y38H	ANG	Y38	Y38H		FLTQHHDAKPQ	0	0.603755	0.0383294	0.669486	0.0937996	0.875767	0.0717174	0.410611	0.241458
572	ANGPTL3_Y417	ANGPTL3	Y417			NLNGKYNKPRA	1	1.18377	0.63462	0.875038	0.263247	1.29855	0.109025	0.860569	0.362186
573	ANGPTL3_Y417_N418Y	ANGPTL3	Y417	N418Y		NLNGKYYKPRA	2	0.861303	0.393222	0.974217	0.159844	1.30058	0.174682	0.874814	0.312257
574	ANGPTL3_Y417_N418Y_YF	ANGPTL3	Y417	N418Y	YF	NLNGKYFKPRA	1	0.961106	0.558849	1.16301	0.303393	1.20817	0.143024	0.757991	0.232803
575	ANGPTL3_Y417_Y417C	ANGPTL3	Y417	Y417C		NLNGKCNKPRA	0	0.496085	0.287091	1.24359	0.903908	1.23132	0.475889	0.696274	0.519565
576	ANGPTL7_Y145	ANGPTL7	Y145			RISGVYKLPPD	1	0.52531	0.25667	0.85711	0.25848	1.02384	0.610206	1.88561	0.546443
577	ANGPTL7_Y145_R140H	ANGPTL7	Y145	R140H		HISGVYKLPPD	1	0.458624	0.0225055	0.92514	0.325188	0.956778	0.118256	2.25248	0.837709
578	ANK1_Y1073	ANK1	Y1073			RLCQDYDTIGP	1	1.61525	0.234057	0.814152	0.316373	1.35317	0.671932	0.640807	0.323144
579	ANK1_Y1073_T1075I	ANK1	Y1073	T1075I		RLCQDYDIIGP	1	1.28961	0.341035	0.781379	0.188571	0.703397	0.257654	0.612465	0.219425
580	ANK1_Y624	ANK1	Y624			RSLLQYGGSAN	1	0.481627	0.198526	0.716268	0.1051	0.74894	0.218336	0.473078	0.232324
581	ANK1_Y624_R619H	ANK1	Y624	R619H		HSLLQYGGSAN	1	0.366589	0.0811148	0.660889	0.186111	0.861905	0.360128	0.480459	0.2497
582	ANK1_Y735	ANK1	Y735			KTKLGYSPLHQ	1	0.849259	0.394366	1.05297	0.498213	1.1982	0.0420989	0.729998	0.308065
583	ANK1_Y735_L733I	ANK1	Y735	L733I		KTKIGYSPLHQ	1	0.397996	0.11561	0.826666	0.24502	0.902733	0.0715691	0.371232	0.207557
584	ANK2_Y1455	ANK2	Y1455			ITLPIYTKESE	1	0.515467	0.0730206	0.719804	0.308532	0.845196	0.207506	1.03258	0.255206
585	ANK2_Y1455_E1458G	ANK2	Y1455	E1458G		ITLPIYTKGSE	1	0.392038	0.0995943	0.714504	0.397694	0.780318	0.30748	0.757335	0.216771
586	ANK2_Y3907	ANK2	Y3907			KIIRRYVSSEG	1	0.420942	0.0800023	0.533321	0.16078	0.637267	0.0953351	0.257453	0.148096
587	ANK2_Y3907_R3906W	ANK2	Y3907	R3906W		KIIRWYVSSEG	1	1.17547	0.279231	1.50564	0.649477	1.19031	0.358734	0.799196	0.342244
588	ANKZF1_Y572	ANKZF1	Y572			RARPPYTVAAD	1	0.933166	0.579035	1.13504	0.503919	1.27472	0.294823	1.16219	0.226524
589	ANKZF1_Y572_R569W	ANKZF1	Y572	R569W		RAWPPYTVAAD	1	0.556023	0.156502	0.696917	0.364014	1.08281	0.310429	3.39951	1.32213
590	ANO1_Y981	ANO1	Y981			APSHAYHGGVL	1	0.629419	0.187129	0.500905	0.0934957	0.881024	0.0804192	0.721475	0.2902
591	ANO1_Y981_G983R	ANO1	Y981	G983R		APSHAYHRGVL	1	0.678589	0.0389504	0.899345	0.0481869	0.987729	0.0515543	0.752185	0.292774
592	ANOS1_Y217	ANOS1	Y217			IEPVIYVVQRR	1	0.255367	0.10571	0.235646	0.0273566	0.512462	0.111555	0.269417	0.21249
593	ANOS1_Y217_Y217D	ANOS1	Y217	Y217D		IEPVIDVVQRR	0	0.608278	0.0986076	0.517066	0.279003	0.84831	0.226874	0.447905	0.220542
594	ANOS1_Y259	ANOS1	Y259			RPSRWYQFRVA	1	0.541003	0.407555	0.568314	0.0934724	0.771012	0.181473	0.250242	0.144918
595	ANOS1_Y259_R262P	ANOS1	Y259	R262P		RPSRWYQFPVA	1	1.71064	0.854562	2.07019	1.41731	1.79423	0.439091	1.75488	0.699665
596	ANPEP_Y600	ANPEP	Y600			RQQQDYWLIDV	1	0.585905	0.0499992	0.912998	0.478645	1.07075	0.303039	0.65228	0.277175
597	ANPEP_Y600_I603K	ANPEP	Y600	I603K		RQQQDYWLKDV	1	0.674694	0.358897	0.635395	0.386925	1.01316	0.393367	4.38678	3.12124
598	ANPEP_Y600_I603M	ANPEP	Y600	I603M		RQQQDYWLMDV	1	0.633719	0.0493255	0.815203	0.258212	0.896483	0.331823	0.467112	0.226002
599	ANTXR2_Y380	ANTXR2	Y380			TVDASYYGGRG	2	0.604391	0.229037	0.423799	0.280018	0.762521	0.129804	5.42287	1.23625
600	ANTXR2_Y380_Y381C	ANTXR2	Y380	Y381C		TVDASYCGGRG	1	0.567343	0.228399	0.91433	0.242402	0.757242	0.251957	0.794891	0.0635638
601	ANTXR2_Y380_YF	ANTXR2	Y380		YF	TVDASYFGGRG	1	0.47442	0.189201	0.512772	0.351329	1.01394	0.0381022	1.82022	0.0831996
602	ANTXR2_Y381	ANTXR2	Y381			VDASYYGGRGV	2	0.470928	0.157298	0.637652	0.0106502	0.738378	0.0745137	6.19935	1.80734
603	ANTXR2_Y381_Y381C	ANTXR2	Y381	Y381C		VDASYCGGRGV	1	0.382329	0.082324	0.331385	0.220772	0.620218	0.185418	0.846561	0.413032
604	ANTXR2_Y381_Y381C_YF	ANTXR2	Y381	Y381C	YF	VDASFCGGRGV	0	0.388778	0.0812271	0.558827	0.257458	0.727858	0.188443	0.481523	0.259667
605	ANTXR2_Y381_YF	ANTXR2	Y381		YF	VDASFYGGRGV	1	0.499908	0.0851384	0.575929	0.205818	0.721426	0.321683	0.964117	0.32811
606	ANXA1_Y335	ANXA1	Y335			ETKGDYEKILV	1	1.08294	0.218193	0.539832	0.401302	0.814509	0.224648	0.566208	0.323814
607	ANXA1_Y335_G333E	ANXA1	Y335	G333E		ETKEDYEKILV	1	0.593905	0.270767	0.904658	0.442671	0.971766	0.218774	0.472916	0.326741
608	ANXA13_Y90	ANXA13	Y90			DRPSEYAARQL	1	0.522869	0.168446	0.698533	0.261311	0.745629	0.147467	0.738025	0.0957455
609	ANXA13_Y90_R86H	ANXA13	Y90	R86H		DHPSEYAARQL	1	0.48345	0.161357	0.656754	0.279763	0.826325	0.15588	0.58868	0.293556
610	ANXA3_Y15	ANXA3	Y15			GTVRDYPDFSP	1	0.439191	0.144511	0.623015	0.232168	0.732247	0.339401	0.401434	0.208516
611	ANXA3_Y15_S19N	ANXA3	Y15	S19N		GTVRDYPDFNP	1	0.53637	0.230542	0.609067	0.048375	0.874467	0.175143	0.538968	0.291949
612	ANXA3_Y216	ANXA3	Y216			LTFDEYRNISQ	1	0.489596	0.141661	0.585217	0.338581	2.68068	1.55261	1.27552	0.252427
613	ANXA3_Y216_I219N	ANXA3	Y216	I219N		LTFDEYRNNSQ	1	0.416944	0.301735	0.615981	0.220106	0.653747	0.0632197	0.805482	0.353999
614	ANXA3_Y295	ANXA3	Y295			EFKKHYGYSLY	3	1.57208	0.416734	1.50772	0.678438	1.3098	0.0172911	1.97133	0.277873
615	ANXA3_Y295_F291S	ANXA3	Y295	F291S		ESKKHYGYSLY	3	0.913496	0.491902	0.962734	0.324216	0.703832	0.0891826	1.01989	0.24257
616	ANXA3_Y295_F291S_YF	ANXA3	Y295	F291S	YF	ESKKHYGFSLF	1	0.643588	0.13723	0.716569	0.421838	1.03187	0.0820013	0.556153	0.200403
617	ANXA3_Y295_YF	ANXA3	Y295		YF	EFKKHYGFSLF	1	0.621841	0.0959504	0.748664	0.0707282	0.815325	0.2327	0.564951	0.182107
618	AP1S3_Y87	AP1S3	Y87			EIVHRYVELLD	1	21.5539	2.22777	1.11492	0.377355	0.910453	0.220786	0.581328	0.344321
619	AP1S3_Y87_I83T	AP1S3	Y87	I83T		ETVHRYVELLD	1	24.4997	2.44398	1.94439	0.143791	0.929491	0.111446	0.578486	0.311686
620	APBA1_Y183	APBA1	Y183			GEDEPYSEPYA	2	0.581642	0.289698	0.741886	0.346605	0.902541	0.0653114	0.672536	0.31254
621	APBA1_Y183_S184A	APBA1	Y183	S184A		GEDEPYAEPYA	2	0.8215	0.38162	0.884725	0.416734	1.10284	0.417635	0.670876	0.308297
622	APBA1_Y183_S184A_YF	APBA1	Y183	S184A	YF	GEDEPYAEPFA	1	0.636079	0.309698	0.652225	0.345487	1.07894	0.299389	0.623428	0.43626
623	APBA1_Y183_YF	APBA1	Y183		YF	GEDEPYSEPFA	1	0.593325	0.199056	0.914014	0.0965454	0.936311	0.0589623	0.47354	0.322431
624	APBA1_Y187	APBA1	Y187			PYSEPYADYGG	3	6.46844	1.34658	0.650516	0.373893	0.674811	0.0868973	3.46217	1.62516
625	APBA1_Y187_S184A	APBA1	Y187	S184A		PYAEPYADYGG	3	7.7149	0.54657	0.695372	0.152244	0.83598	0.365853	2.49178	1.17811
626	APBA1_Y187_S184A_YF	APBA1	Y187	S184A	YF	PFAEPYADFGG	1	0.676012	0.382678	0.681959	0.526736	0.742156	0.356278	0.775523	0.259244
627	APBA1_Y187_YF	APBA1	Y187		YF	PFSEPYADFGG	1	0.868483	0.254581	0.6595	0.344687	0.86194	0.44038	0.660177	0.241163
628	APBB1IP_Y331	APBB1IP	Y331			SWKRRYFLLRA	1	0.394146	0.188219	0.689319	0.265675	0.638809	0.153873	0.294392	0.184689
629	APBB1IP_Y331_R335W	APBB1IP	Y331	R335W		SWKRRYFLLWA	1	0.428499	0.182829	0.646375	0.0815703	0.684196	0.315101	0.315772	0.0985959
630	APBB1IP_Y340	APBB1IP	Y340			RASGIYYVPKG	2	0.95546	0.195655	0.767049	0.16787	1.09712	0.170114	1.57068	0.197919
631	APBB1IP_Y340_R335W	APBB1IP	Y340	R335W		WASGIYYVPKG	2	0.882963	0.264085	0.959411	0.0941193	1.21166	0.628853	3.54504	0.509847
632	APBB1IP_Y340_R335W_YF	APBB1IP	Y340	R335W	YF	WASGIYFVPKG	1	0.84787	0.0818997	1.16977	0.277675	1.2898	0.0125306	1.26137	0.242367
633	APBB1IP_Y340_YF	APBB1IP	Y340		YF	RASGIYFVPKG	1	0.935268	0.452762	1.10672	0.289517	1.12282	0.465693	1.43668	0.807939
634	APC_Y1183	APC	Y1183			DYSLKYATDIP	2	0.443163	0.119796	0.535866	0.190265	0.704369	0.0997397	1.08364	0.269785
635	APC_Y1183_A1184P	APC	Y1183	A1184P		DYSLKYPTDIP	2	0.43797	0.153303	0.666369	0.361274	0.76458	0.0619515	1.10909	0.280693
636	APC_Y1183_A1184P_YF	APC	Y1183	A1184P	YF	DFSLKYPTDIP	1	0.386025	0.0814077	0.6179	0.177015	0.767829	0.141101	0.443026	0.23352
637	APC_Y1183_YF	APC	Y1183		YF	DFSLKYATDIP	1	0.45722	0.168695	0.736788	0.101538	0.781424	0.125816	0.432282	0.247908
638	APC_Y2838	APC	Y2838			RHSGSYLVTSV	1	0.603884	0.144688	0.913787	0.475765	0.791373	0.10983	0.727916	0.290933
639	APC_Y2838_L2839F	APC	Y2838	L2839F		RHSGSYFVTSV	1	0.547385	0.107412	0.498561	0.063013	0.786985	0.279823	2.44023	0.610514
640	APC_Y96	APC	Y96			MSLRSYGSREG	1	0.453373	0.182736	0.409363	0.148195	0.762756	0.151512	0.452079	0.257391
641	APC_Y96_R99W	APC	Y96	R99W		MSLRSYGSWEG	1	0.28162	0.101236	0.411817	0.458453	0.450184	0.343326	0.566363	0.82873
642	APCS_Y142	APCS	Y142			GLRQGYFVEAQ	1	0.617699	0.125581	0.718498	0.145213	0.850347	0.280577	0.579088	0.227603
643	APCS_Y142_G141S	APCS	Y142	G141S		GLRQSYFVEAQ	1	0.680685	0.425673	0.725932	0.165529	0.686057	0.169423	0.620959	0.151813
644	API5_Y497	API5	Y497			LGNFNYEQRGA	1	0.462298	0.184249	0.48655	0.133196	0.869767	0.157369	1.10425	0.252646
645	API5_Y497_G493S	API5	Y497	G493S		LSNFNYEQRGA	1	0.480154	0.198391	0.705905	0.261949	0.897433	0.14823	1.16401	0.138746
646	APOA1_Y190	APOA1	Y190			THLAPYSDELR	1	0.437025	0.0650373	0.909044	0.271857	0.72265	0.194949	0.887607	0.138101
647	APOA1_Y190_P189R	APOA1	Y190	P189R		THLARYSDELR	1	0.553715	0.364549	0.621946	0.246973	0.96012	0.242456	0.539275	0.27177
648	APOA1_Y53	APOA1	Y53			DSGRDYVSQFE	1	0.486941	0.213227	0.631038	0.176493	0.874998	0.126721	0.448444	0.233302
649	APOA1_Y53_G50R	APOA1	Y53	G50R		DSRRDYVSQFE	1	0.530633	0.330117	0.523521	0.321813	0.803381	0.143478	0.420783	0.252335
650	APOA4_Y310	APOA4	Y310			RRVEPYGENFN	1	0.513018	0.261427	0.588302	0.101902	0.687344	0.114615	0.527639	0.263401
651	APOA4_Y310_R305C	APOA4	Y310	R305C		CRVEPYGENFN	1	0.675403	0.14112	0.712085	0.252682	0.702555	0.027553	0.656051	0.125811
652	APOA4_Y310_V307L	APOA4	Y310	V307L		RRLEPYGENFN	1	0.526972	0.224218	0.286176	0.0626806	0.82238	0.44691	0.533287	0.302694
653	APOB_Y276	APOB	Y276			SYKNKYGMVAQ	2	0.612663	0.0966484	0.785534	0.0783044	1.01115	0.087973	0.692517	0.364638
654	APOB_Y276_K273N	APOB	Y276	K273N		SYNNKYGMVAQ	2	0.490453	0.151489	0.55503	0.137433	0.713045	0.157321	0.946257	0.0509483
655	APOB_Y276_K273N_YF	APOB	Y276	K273N	YF	SFNNKYGMVAQ	1	0.435355	0.158411	0.679994	0.130621	0.852363	0.0608421	0.664455	0.171331
656	APOB_Y276_YF	APOB	Y276		YF	SFKNKYGMVAQ	1	0.454903	0.119635	0.542741	0.17129	0.934195	0.152096	0.501705	0.190319
657	APOB_Y740	APOB	Y740			VDHFGYTKDDK	1	0.592074	0.156014	0.950281	0.148271	0.819491	0.190873	0.516047	0.22148
658	APOB_Y740_T741N	APOB	Y740	T741N		VDHFGYNKDDK	1	0.464912	0.159961	0.595166	0.129771	0.66543	0.233283	0.518778	0.231778
659	APOC2_Y47	APOC2	Y47			ESLSSYWESAK	1	0.713129	0.154072	0.752829	0.264498	0.888773	0.402445	3.26851	2.47455
660	APOC2_Y47_W48R	APOC2	Y47	W48R		ESLSSYRESAK	1	0.555953	0.178362	0.795263	0.242051	0.857589	0.244981	0.46815	0.247825
661	APOE_Y180	APOE	Y180			KRLAVYQAGAR	1	0.878595	0.0474158	1.05106	0.227251	1.09882	0.25462	0.913285	0.262551
662	APOE_Y180_R176C	APOE	Y180	R176C		KCLAVYQAGAR	1	0.677214	0.115062	0.627974	0.133995	0.841023	0.177177	0.780268	0.11633
663	APP_Y728	APP	Y728			LKKKQYTSIHH	1	1.88796	0.267165	2.62726	0.701682	1.53028	0.211735	1.02818	0.297485
664	APP_Y728_L723P	APP	Y728	L723P		PKKKQYTSIHH	1	0.935815	0.249196	0.945966	0.492779	1.00895	0.356736	0.607165	0.349846
665	APRT_Y60	APRT	Y60			GGRIDYIAGLD	1	0.497929	0.163644	0.727905	0.0184662	0.788876	0.158715	0.570281	0.248743
666	APRT_Y60_D65V	APRT	Y60	D65V		GGRIDYIAGLV	1	0.381563	0.138159	0.581987	0.26266	0.6918	0.0282939	0.545935	0.116202
667	APTX_Y209	APTX	Y209			VIKDKYPKARY	2	1.25145	0.876366	1.04715	0.618855	1.30647	0.232009	0.811818	0.175926
668	APTX_Y209_A212V	APTX	Y209	A212V		VIKDKYPKVRY	2	1.04632	0.590402	1.16306	0.497935	1.18488	0.218503	0.740367	0.260102
669	APTX_Y209_A212V_YF	APTX	Y209	A212V	YF	VIKDKYPKVRF	1	1.04442	0.546588	1.40099	0.487772	1.39854	0.239531	0.856854	0.254208
670	APTX_Y209_K211Q	APTX	Y209	K211Q		VIKDKYPQARY	2	0.531872	0.0925196	0.659928	0.175326	0.888227	0.135488	0.59351	0.296255
671	APTX_Y209_K211Q_YF	APTX	Y209	K211Q	YF	VIKDKYPQARF	1	0.562215	0.205495	1.01785	0.0811207	1.06257	0.259053	0.489304	0.324312
672	APTX_Y209_R213H	APTX	Y209	R213H		VIKDKYPKAHY	2	0.955713	0.338913	1.11085	0.60168	1.19351	0.200872	0.758227	0.281156
673	APTX_Y209_R213H_YF	APTX	Y209	R213H	YF	VIKDKYPKAHF	1	0.765731	0.370369	1.0133	0.212089	0.998763	0.159087	0.511966	0.263382
674	APTX_Y209_YF	APTX	Y209		YF	VIKDKYPKARF	1	1.04345	0.673221	1.251	0.604044	1.14869	0.187115	0.634379	0.190588
675	APTX_Y214	APTX	Y214			YPKARYHWLVL	2	1.2024	0.484671	1.46074	0.0991161	1.54218	0.144102	1.39258	0.362833
676	APTX_Y214_A212V	APTX	Y214	A212V		YPKVRYHWLVL	2	0.756274	0.132774	1.16607	0.23377	1.05447	0.357604	0.916884	0.263061
677	APTX_Y214_A212V_YF	APTX	Y214	A212V	YF	FPKVRYHWLVL	1	0.891863	0.471835	0.998988	0.0692865	1.31543	0.337956	0.9379	0.24435
678	APTX_Y214_H215R	APTX	Y214	H215R		YPKARYRWLVL	2	0.933398	0.461868	1.01921	0.26458	1.07943	0.400244	0.471904	0.186235
679	APTX_Y214_H215R_YF	APTX	Y214	H215R	YF	FPKARYRWLVL	1	0.574582	0.139049	0.567608	0.137619	0.909004	0.30023	0.35517	0.180564
680	APTX_Y214_K211Q	APTX	Y214	K211Q		YPQARYHWLVL	2	0.979762	0.207849	1.42634	0.492847	1.26679	0.42126	1.27743	0.261074
681	APTX_Y214_K211Q_YF	APTX	Y214	K211Q	YF	FPQARYHWLVL	1	1.13268	0.387276	1.46872	0.119323	1.25388	0.190162	1.34388	0.233198
682	APTX_Y214_R213H	APTX	Y214	R213H		YPKAHYHWLVL	2	1.1992	0.519448	1.43128	0.192068	1.5966	0.49841	1.45264	0.193848
683	APTX_Y214_R213H_YF	APTX	Y214	R213H	YF	FPKAHYHWLVL	1	1.53867	0.443237	1.70046	0.192786	1.86115	0.708699	1.68566	0.615365
684	APTX_Y214_YF	APTX	Y214		YF	FPKARYHWLVL	1	1.42443	0.698409	1.94204	1.12755	1.49633	0.423604	1.05158	0.324426
685	AQP6_Y231	AQP6	Y231			LASLIYNFVLF	1	0.692451	0.159792	0.988519	0.165521	1.10786	0.207799	0.902336	0.0603462
686	AQP6_Y231_V234I	AQP6	Y231	V234I		LASLIYNFILF	1	1.02447	0.675092	1.03723	0.292886	0.992897	0.287058	1.0061	0.128243
687	AR_Y269	AR	Y269			RGDCMYAPLLG	1	1.03807	0.280015	0.739076	0.43612	0.980386	0.181297	0.796451	0.185977
688	AR_Y269_M268T	AR	Y269	M268T		RGDCTYAPLLG	1	0.895812	0.184541	0.593851	0.344065	0.880029	0.191407	0.693407	0.286097
689	AR_Y269_P271S	AR	Y269	P271S		RGDCMYASLLG	1	1.11578	0.193768	1.99133	0.397228	1.25865	0.673134	0.84426	0.35883
690	AR_Y395	AR	Y395			ENPLDYGSAWA	1	0.453709	0.195458	0.805574	0.112023	0.716229	0.250671	1.18792	0.709595
691	AR_Y395_P392R	AR	Y395	P392R		ENRLDYGSAWA	1	0.498969	0.173831	0.734929	0.207643	0.954682	0.177417	1.90909	1.08607
692	AR_Y395_P392S	AR	Y395	P392S		ENSLDYGSAWA	1	0.475113	0.205856	0.56311	0.0859607	0.752116	0.0618604	0.56682	0.106895
693	AR_Y552	AR	Y552			VLPIDYYFPPQ	2	1.03252	0.397141	0.850459	0.203167	0.961849	0.0460347	1.97932	1.80204
694	AR_Y552_L548F	AR	Y552	L548F		VFPIDYYFPPQ	2	1.04005	0.329514	1.08273	0.213583	1.24052	0.61798	2.93706	2.57377
695	AR_Y552_L548F_YF	AR	Y552	L548F	YF	VFPIDYFFPPQ	1	0.645654	0.245792	1.32433	0.193211	1.39782	0.259228	0.721493	0.235539
696	AR_Y552_P549S	AR	Y552	P549S		VLSIDYYFPPQ	2	1.33785	0.441653	1.5458	0.659728	1.47188	0.655746	1.9465	1.10155
697	AR_Y552_P549S_YF	AR	Y552	P549S	YF	VLSIDYFFPPQ	1	0.851726	0.194941	0.998158	0.106591	1.4586	0.338084	0.821817	0.401474
698	AR_Y552_YF	AR	Y552		YF	VLPIDYFFPPQ	1	0.696225	0.299383	0.882365	0.211244	0.986498	0.311876	0.480148	0.235941
699	AR_Y858	AR	Y858			CSRRFYQLTKL	1	0.405936	0.165224	0.487615	0.186692	0.663391	0.265612	0.273231	0.192983
700	AR_Y858_F857L	AR	Y858	F857L		CSRRLYQLTKL	1	0.524375	0.188609	0.449089	0.135622	0.640888	0.223248	0.336564	0.175246
701	AR_Y858_R855K	AR	Y858	R855K		CSKRFYQLTKL	1	0.777407	0.152233	0.873672	0.250094	1.08519	0.150193	0.643481	0.205324
702	AR_Y858_R856C	AR	Y858	R856C		CSRCFYQLTKL	1	1.17937	0.777608	1.51864	1.30842	1.23702	0.120586	0.984725	0.201389
703	AR_Y858_R856H	AR	Y858	R856H		CSRHFYQLTKL	1	0.970068	0.534223	0.821333	0.124649	1.04172	0.202948	0.751729	0.165662
704	AR_Y916	AR	Y916			KVKPIYFHTQG	1	1.37147	0.831169	1.82402	0.594563	1.59379	0.514873	1.50745	0.715884
705	AR_Y916_F917L	AR	Y916	F917L		KVKPIYLHTQG	1	1.6531	1.05338	1.84107	0.245791	1.70464	0.124694	1.4634	0.617101
706	AR_Y916_H918R	AR	Y916	H918R		KVKPIYFRTQG	1	1.50588	1.08891	1.76211	0.5723	1.62961	0.259854	1.48864	0.70846
707	AR_Y916_K911R	AR	Y916	K911R		RVKPIYFHTQG	1	1.53288	0.705362	1.6649	0.350891	2.11284	0.63536	1.40506	0.714687
708	AR_Y916_P914S	AR	Y916	P914S		KVKSIYFHTQG	1	0.567731	0.12724	0.793342	0.227335	0.640532	0.143303	0.612322	0.207267
709	AR_Y916_Q920R	AR	Y916	Q920R		KVKPIYFHTRG	1	1.8359	0.912127	2.07441	0.516643	2.19857	0.555788	2.07829	0.559189
710	AR_Y916_V912L	AR	Y916	V912L		KLKPIYFHTQG	1	1.9451	1.08767	2.11757	0.671944	1.78454	0.191777	1.67089	0.554351
711	ARAP1_Y359	ARAP1	Y359			TDHLRYFDSNK	1	0.506932	0.20597	0.714463	0.256146	0.96776	0.248561	0.802519	0.102821
712	ARAP1_Y359_R358Q	ARAP1	Y359	R358Q		TDHLQYFDSNK	1	0.536364	0.317133	0.939771	0.264621	1.19507	0.742425	2.68526	0.612084
713	ARAP2_Y380	ARAP2	Y380			IKSSIYDNRKE	1	0.444637	0.0372684	0.741146	0.0682343	0.933749	0.111476	0.706531	0.248276
714	ARAP2_Y380_K384N	ARAP2	Y380	K384N		IKSSIYDNRNE	1	0.60801	0.227344	0.59275	0.297098	0.681984	0.0370443	0.579746	0.282035
715	ARCN1_Y310	ARCN1	Y310			ISDDKYGRIRL	1	0.433759	0.168555	0.639494	0.0785652	0.806144	0.262025	0.458557	0.208838
716	ARCN1_Y310_K309N	ARCN1	Y310	K309N		ISDDNYGRIRL	1	0.51766	0.143662	0.770453	0.534632	1.00492	0.145599	0.469907	0.257267
717	ARF1_Y35	ARF1	Y35			KTTILYKLKLG	1	0.8649	0.143566	0.972859	0.00231601	1.32766	0.0926163	0.790426	0.391991
718	ARF1_Y35_Y35H	ARF1	Y35	Y35H		KTTILHKLKLG	0	1.45732	1.2264	1.2413	0.578718	1.50131	0.388486	1.01001	0.0982172
719	ARFGAP3_Y356	ARFGAP3	Y356			TSSSSYFDEPV	1	0.568629	0.222019	0.82749	0.397443	0.761725	0.162776	2.51432	1.15981
720	ARFGAP3_Y356_S355R	ARFGAP3	Y356	S355R		TSSSRYFDEPV	1	0.47507	0.157174	0.745161	0.69001	0.72473	0.122993	0.470089	0.152447
721	ARFGAP3_Y473	ARFGAP3	Y473			QPAGNYSLSSV	1	0.486126	0.261034	1.0047	0.205148	0.812004	0.421236	1.91226	1.19469
722	ARFGAP3_Y473_Q468H	ARFGAP3	Y473	Q468H		HPAGNYSLSSV	1	0.602869	0.0804997	0.789528	0.156358	0.803886	0.255002	1.73403	0.693059
723	ARFGEF1_Y314	ARFGEF1	Y314			KNEVLYDGENH	1	0.664557	0.235646	0.68724	0.161962	0.977669	0.171812	0.662597	0.263887
724	ARFGEF1_Y314_G316E	ARFGEF1	Y314	G316E		KNEVLYDEENH	1	0.636393	0.177541	0.788853	0.282978	0.664159	0.162554	0.433685	0.131103
725	ARFGEF2_Y797	ARFGEF2	Y797			MTKEQYIKMNR	1	0.454166	0.132195	0.67242	0.0804988	0.823354	0.107963	0.39848	0.186574
726	ARFGEF2_Y797_K794E	ARFGEF2	Y797	K794E		MTEEQYIKMNR	1	0.375739	0.160714	0.434836	0.155106	0.673954	0.252328	0.413514	0.252205
727	ARFGEF2_Y797_R802Q	ARFGEF2	Y797	R802Q		MTKEQYIKMNQ	1	0.516573	0.0841717	0.48737	0.343811	0.967596	0.274596	0.33021	0.258459
728	ARFGEF3_Y2029	ARFGEF3	Y2029			KLMTEYKKRKQ	1	1.08405	0.714823	0.878048	0.378204	1.27252	0.387078	0.654121	0.272512
729	ARFGEF3_Y2029_K2031R	ARFGEF3	Y2029	K2031R		KLMTEYKRRKQ	1	0.341829	0.105674	0.636052	0.474249	0.642409	0.176073	0.262548	0.15442
730	ARHGAP1_Y365	ARHGAP1	Y365			LPEENYQVLRF	1	0.547637	0.111824	0.784193	0.493853	1.52939	0.385179	0.701997	0.477802
731	ARHGAP1_Y365_R369C	ARHGAP1	Y365	R369C		LPEENYQVLCF	1	0.819769	0.387496	0.489928	0.449322	0.738577	0.356303	0.753688	0.255956
732	ARHGEF7_Y785	ARHGEF7	Y785			WTAHSYRMGST	1	0.537873	0.0684674	0.65146	0.0205858	0.837652	0.0808282	0.415709	0.226841
733	ARHGEF7_Y785_T790A	ARHGEF7	Y785	T790A		WTAHSYRMGSA	1	0.544718	0.049533	0.793611	0.105548	0.960355	0.188151	0.560022	0.242537
734	ARID1B_Y1091	ARID1B	Y1091			DLFRLYVCVKE	1	0.349762	0.0227957	0.50975	0.184381	0.589818	0.106631	0.444577	0.152131
735	ARID1B_Y1091_V1092I	ARID1B	Y1091	V1092I		DLFRLYICVKE	1	0.384386	0.151887	0.521144	0.101917	0.744216	0.233296	0.537162	0.225212
736	ARID1B_Y483	ARID1B	Y483			DMGAQYAAASP	1	0.63023	0.22448	0.647366	0.206646	0.670441	0.0992797	1.08233	0.0449236
737	ARID1B_Y483_P488R	ARID1B	Y483	P488R		DMGAQYAAASR	1	0.612021	0.170921	0.553468	0.119886	0.760919	0.051745	1.05458	0.102002
738	ARMC9_Y107	ARMC9	Y107			IHFAIYLLKYS	2	0.725711	0.336736	0.955349	0.201028	1.43864	0.287422	0.761437	0.467029
739	ARMC9_Y107_L108F	ARMC9	Y107	L108F		IHFAIYFLKYS	2	1.10812	0.492354	1.21776	1.03772	1.18039	0.125668	0.896399	0.409155
740	ARMC9_Y107_L108F_YF	ARMC9	Y107	L108F	YF	IHFAIYFLKFS	1	1.11829	0.238328	1.8601	0.705466	1.9337	0.510273	1.27985	0.815455
741	ARMC9_Y107_YF	ARMC9	Y107		YF	IHFAIYLLKFS	1	1.13161	0.513233	1.44639	0.558931	1.68962	0.510683	1.08646	0.62271
742	ARPC1B_Y35	ARPC1B	Y35			HEVHIYEKSGA	1	2.29021	0.301685	0.667186	0.172803	0.816521	0.0988064	0.538925	0.293156
743	ARPC1B_Y35_K37N	ARPC1B	Y35	K37N		HEVHIYENSGA	1	6.64508	0.864416	1.0264	0.538288	12.3519	7.03881	0.743069	0.152267
744	ARSB_Y165	ARSB	Y165			RGFDTYFGYLL	2	0.4168	0.0579166	1.41459	0.751566	1.0018	0.340728	3.33601	3.18068
745	ARSB_Y165_R160Q	ARSB	Y165	R160Q		QGFDTYFGYLL	2	0.326743	0.106955	0.560594	0.0684164	0.596215	0.302393	2.70102	2.93869
746	ARSB_Y165_R160Q_YF	ARSB	Y165	R160Q	YF	QGFDTYFGFLL	1	0.345406	0.0912947	0.724189	0.275789	0.717323	0.237433	0.477158	0.151806
747	ARSB_Y165_YF	ARSB	Y165		YF	RGFDTYFGFLL	1	0.577849	0.193235	0.828382	0.325466	0.899003	0.251569	0.675021	0.147204
748	ARVCF_Y901	ARVCF	Y901			LGPDGYSTVDR	1	29.1809	8.7263	1.18269	0.397697	0.927438	0.300241	2.80676	0.543261
749	ARVCF_Y901_R906Q	ARVCF	Y901	R906Q		LGPDGYSTVDQ	1	36.0296	7.01686	1.77051	1.32864	1.20771	0.528333	2.77695	0.195134
750	ASAH1_Y43	ASAH1	Y43			PSGPTYRGAVP	1	0.519164	0.0622772	0.740224	0.302386	0.87555	0.209131	0.515682	0.25336
751	ASAH1_Y43_T42A	ASAH1	Y43	T42A		PSGPAYRGAVP	1	0.489519	0.117569	0.455498	0.254205	0.719577	0.113577	0.526805	0.137266
752	ASAH1_Y43_T42M	ASAH1	Y43	T42M		PSGPMYRGAVP	1	0.472464	0.150922	0.841703	0.305467	0.926458	0.104874	0.716012	0.222114
753	ASB10_Y457	ASB10	Y457			PRLLRYLQLDF	1	1.10882	0.564316	1.59973	0.973764	1.26768	0.0612092	0.922444	0.208823
754	ASB10_Y457_R453C	ASB10	Y457	R453C		PCLLRYLQLDF	1	1.26026	0.719643	1.26522	0.344558	1.12078	0.19062	1.00256	0.0885577
755	ASB2_Y162	ASB2	Y162			RETPLYKACER	1	0.85531	0.48368	1.26993	0.542003	1.42116	0.698137	1.25278	0.318082
756	ASB2_Y162_P160S	ASB2	Y162	P160S		RETSLYKACER	1	0.857489	0.434115	0.799131	0.379779	1.14108	0.305855	0.838029	0.337863
757	ASCC1_Y36	ASCC1	Y36			DEEDFYQGSME	1	0.426828	0.0920179	0.574886	0.208105	0.571672	0.186297	0.421206	0.204607
758	ASCC1_Y36_D34N	ASCC1	Y36	D34N		DEENFYQGSME	1	0.555509	0.225908	0.700643	0.250123	0.890941	0.201416	0.509475	0.307324
759	ASIC2_Y357	ASIC2	Y357			EKDSNYCLCRT	1	0.778074	0.296468	0.788695	0.184594	0.976083	0.304843	0.571474	0.294769
760	ASIC2_Y357_D354G	ASIC2	Y357	D354G		EKGSNYCLCRT	1	0.644985	0.133001	0.806406	0.167214	0.946645	0.333089	0.550526	0.28617
761	ASL_Y375	ASL	Y375			ATDLAYYLVRK	2	0.797817	0.0613268	0.987688	0.178281	1.25203	0.0595295	2.64832	0.907323
762	ASL_Y375_K380E	ASL	Y375	K380E		ATDLAYYLVRE	2	1.57847	0.456191	3.30228	0.925636	1.07715	0.173434	3.06107	1.05266
763	ASL_Y375_K380E_YF	ASL	Y375	K380E	YF	ATDLAYFLVRE	1	1.26055	0.260842	1.66623	0.448476	0.827406	0.29332	3.06115	1.05389
764	ASL_Y375_R379C	ASL	Y375	R379C		ATDLAYYLVCK	2	0.590353	0.111151	0.505185	0.0614077	0.803024	0.123954	0.741865	0.157584
765	ASL_Y375_R379C_YF	ASL	Y375	R379C	YF	ATDLAYFLVCK	1	0.424914	0.0638317	0.747989	0.237771	0.77573	0.109615	0.599817	0.0523555
766	ASL_Y375_YF	ASL	Y375		YF	ATDLAYFLVRK	1	1.17876	0.76263	1.84266	1.54527	2.03467	1.22721	4.18338	2.3797
767	ASL_Y376	ASL	Y376			TDLAYYLVRKG	2	0.795174	0.372176	1.4081	0.306286	0.949545	0.234311	2.44389	0.366273
768	ASL_Y376_K380E	ASL	Y376	K380E		TDLAYYLVREG	2	1.51487	0.23278	2.07005	0.966477	0.751239	0.273192	2.73867	0.756703
769	ASL_Y376_K380E_YF	ASL	Y376	K380E	YF	TDLAFYLVREG	1	0.612321	0.16762	0.674975	0.256634	0.634243	0.33148	0.715561	0.29784
770	ASL_Y376_R379C	ASL	Y376	R379C		TDLAYYLVCKG	2	0.461183	0.339044	0.828739	0.945058	0.958602	0.238215	0.654497	0.127481
771	ASL_Y376_R379C_YF	ASL	Y376	R379C	YF	TDLAFYLVCKG	1	0.388425	0.0845576	0.46064	0.188601	0.731722	0.184211	0.444542	0.103096
772	ASL_Y376_YF	ASL	Y376		YF	TDLAFYLVRKG	1	0.692628	0.341278	0.662272	0.247437	1.07232	0.260865	0.731888	0.399897
773	ASNS_Y555	ASNS	Y555			RTLTHYKSAVK	1	0.544606	0.0952996	0.829946	0.453244	0.933786	0.382332	0.525566	0.329284
774	ASNS_Y555_R550C	ASNS	Y555	R550C		CTLTHYKSAVK	1	0.584941	0.109652	0.681903	0.191845	0.941515	0.313198	0.60753	0.216836
775	ASPA_Y64	ASPA	Y64			KKCTRYIDCDL	1	0.874913	0.388072	0.830247	0.0925261	0.932452	0.0973262	0.525417	0.21601
776	ASPA_Y64_D68A	ASPA	Y64	D68A		KKCTRYIDCAL	1	0.708966	0.33422	0.805501	0.366776	0.836299	0.156937	0.622979	0.27732
777	ASPA_Y64_L69R	ASPA	Y64	L69R		KKCTRYIDCDR	1	0.839259	0.486233	0.633219	0.17528	0.973831	0.0709875	0.626797	0.22829
778	ASPA_Y64_R63T	ASPA	Y64	R63T		KKCTTYIDCDL	1	0.70291	0.106975	0.826193	0.169936	0.883283	0.280502	0.448203	0.233936
779	ASS1_Y113	ASS1	Y113			REGAKYVSHGA	1	0.41539	0.0584301	0.322048	0.150033	0.602266	0.283772	0.396873	0.242018
780	ASS1_Y113_A111D	ASS1	Y113	A111D		REGDKYVSHGA	1	0.407031	0.195054	1.00772	0.442391	0.622683	0.0453367	0.436635	0.261492
781	ASS1_Y113_A118T	ASS1	Y113	A118T		REGAKYVSHGT	1	0.56614	0.246419	0.705698	0.145152	0.808401	0.127062	0.328791	0.19992
782	ASS1_Y113_G117C	ASS1	Y113	G117C		REGAKYVSHCA	1	0.675932	0.245993	0.722627	0.292134	1.04286	0.442873	0.678281	0.315395
783	ASS1_Y113_G117D	ASS1	Y113	G117D		REGAKYVSHDA	1	0.389396	0.176403	0.452377	0.17362	0.677557	0.160405	0.460288	0.197226
784	ASS1_Y113_G117S	ASS1	Y113	G117S		REGAKYVSHSA	1	0.47278	0.248304	0.560888	0.16779	0.877932	0.229418	0.446727	0.371088
785	ASS1_Y113_R108L	ASS1	Y113	R108L		LEGAKYVSHGA	1	0.446367	0.45008	0.51597	0.15584	1.18018	0.577803	0.515263	0.348471
786	ASS1_Y163	ASS1	Y163			NDLMEYAKQHG	1	0.380968	0.128434	0.621086	0.135146	0.724069	0.0516103	0.486946	0.143733
787	ASS1_Y163_A164P	ASS1	Y163	A164P		NDLMEYPKQHG	1	0.538373	0.090944	0.570996	0.140823	0.886718	0.0807886	0.416279	0.22595
788	ASS1_Y163_L160P	ASS1	Y163	L160P		NDPMEYAKQHG	1	0.456578	0.0936128	0.544571	0.208295	0.804241	0.106688	0.485428	0.259754
789	ASS1_Y291	ASS1	Y291			AGTILYHAHLD	1	0.477372	0.192968	0.739592	0.213889	0.948695	0.105879	1.18776	0.357689
790	ASS1_Y291_D296G	ASS1	Y291	D296G		AGTILYHAHLG	1	0.482553	0.0645651	0.542587	0.242893	0.73666	0.23909	1.73718	0.557275
791	ASS1_Y291_L290P	ASS1	Y291	L290P		AGTIPYHAHLD	1	0.554093	0.115185	0.772093	0.253079	0.837564	0.0754052	0.595908	0.198389
792	ASS1_Y291_Y291S	ASS1	Y291	Y291S		AGTILSHAHLD	0	0.373597	0.0527737	0.549903	0.150816	0.696236	0.0927999	0.396709	0.182051
793	ASS1_Y322	ASS1	Y322			FAELVYTGFWH	1	0.523801	0.139682	0.697681	0.0582751	0.870206	0.282633	0.57611	0.191303
794	ASS1_Y322_G324S	ASS1	Y322	G324S		FAELVYTSFWH	1	0.623985	0.118186	0.611848	0.274681	0.907103	0.521031	0.652608	0.304903
795	ASS1_Y322_G324V	ASS1	Y322	G324V		FAELVYTVFWH	1	0.712566	0.112667	1.05306	0.142744	1.10327	0.354669	0.798646	0.443383
796	ASS1_Y322_V321M	ASS1	Y322	V321M		FAELMYTGFWH	1	0.537973	0.0676544	0.81597	0.240641	0.918476	0.056895	0.565026	0.158894
797	ASS1_Y359	ASS1	Y359			LKGQVYILGRE	1	0.310277	0.0739236	0.444383	0.190126	0.83558	0.105929	0.525862	0.093133
798	ASS1_Y359_G356V	ASS1	Y359	G356V		LKVQVYILGRE	1	0.803693	0.0405658	0.967504	0.409353	1.45543	0.554855	1.02765	0.47825
799	ASS1_Y359_G362V	ASS1	Y359	G362V		LKGQVYILVRE	1	0.524646	0.162797	0.895549	0.277712	0.878127	0.150325	0.565429	0.30193
800	ASS1_Y359_R363G	ASS1	Y359	R363G		LKGQVYILGGE	1	0.529272	0.0894205	0.811775	0.234648	0.951997	0.315767	0.671372	0.0764427
801	ASS1_Y359_R363L	ASS1	Y359	R363L		LKGQVYILGLE	1	0.596808	0.114108	1.01612	0.607387	0.935298	0.621795	0.909812	0.518166
802	ASS1_Y359_R363Q	ASS1	Y359	R363Q		LKGQVYILGQE	1	0.539277	0.279945	0.761023	0.243779	1.16513	0.0557811	0.668824	0.151843
803	ASS1_Y359_R363W	ASS1	Y359	R363W		LKGQVYILGWE	1	0.68429	0.259532	0.826788	0.193998	1.00816	0.00768174	0.771295	0.209246
804	ASS1_Y359_Y359D	ASS1	Y359	Y359D		LKGQVDILGRE	0	0.595044	0.355779	0.582408	0.163281	1.00717	0.3175	0.661357	0.496449
805	ASS1_Y83	ASS1	Y83			QSSALYEDRYL	2	0.652715	0.153392	0.492986	0.366376	0.710731	0.173263	2.01939	0.16791
806	ASS1_Y83_R86C	ASS1	Y83	R86C		QSSALYEDCYL	2	0.860333	0.220742	0.514087	0.346622	0.86327	0.272771	0.550613	0.0388487
807	ASS1_Y83_R86C_YF	ASS1	Y83	R86C	YF	QSSALYEDCFL	1	0.831245	0.183205	0.793799	0.242274	1.13142	0.195976	0.495915	0.306485
808	ASS1_Y83_R86H	ASS1	Y83	R86H		QSSALYEDHYL	2	0.523804	0.257084	0.540067	0.354722	0.880865	0.329721	0.490634	0.223255
809	ASS1_Y83_R86H_YF	ASS1	Y83	R86H	YF	QSSALYEDHFL	1	0.479591	0.28195	1.13442	1.08755	0.808649	0.258334	0.42342	0.289056
810	ASS1_Y83_S79P	ASS1	Y83	S79P		QPSALYEDRYL	2	0.984071	0.388694	0.460832	0.175258	0.918492	0.20811	1.61094	0.112602
811	ASS1_Y83_S79P_YF	ASS1	Y83	S79P	YF	QPSALYEDRFL	1	0.633284	0.2534	0.684465	0.264586	0.783154	0.326084	1.99936	0.177228
812	ASS1_Y83_YF	ASS1	Y83		YF	QSSALYEDRFL	1	0.65033	0.117319	0.471	0.256326	0.835091	0.212101	1.11736	0.236464
813	ASS1_Y87	ASS1	Y87			LYEDRYLLGTS	2	0.546465	0.189474	1.0498	0.527045	0.819874	0.363412	1.49863	0.495028
814	ASS1_Y87_R86C	ASS1	Y87	R86C		LYEDCYLLGTS	2	0.962115	0.531322	0.313684	0.153452	0.933413	0.150734	0.508254	0.158791
815	ASS1_Y87_R86C_YF	ASS1	Y87	R86C	YF	LFEDCYLLGTS	1	0.647258	0.251673	0.92406	0.782136	1.24198	0.619292	0.561978	0.215812
816	ASS1_Y87_R86H	ASS1	Y87	R86H		LYEDHYLLGTS	2	0.57121	0.417151	0.565051	0.231335	0.900143	0.327134	0.54871	0.197911
817	ASS1_Y87_R86H_YF	ASS1	Y87	R86H	YF	LFEDHYLLGTS	1	0.533712	0.133505	0.633829	0.0470751	1.21642	0.82808	0.500322	0.13782
818	ASS1_Y87_T91P	ASS1	Y87	T91P		LYEDRYLLGPS	2	0.625767	0.149749	0.661972	0.283112	0.690026	0.0602199	1.39922	0.357142
819	ASS1_Y87_T91P_YF	ASS1	Y87	T91P	YF	LFEDRYLLGPS	1	0.551892	0.180537	0.515211	0.177721	0.96474	0.047689	1.18952	0.600288
820	ASS1_Y87_YF	ASS1	Y87		YF	LFEDRYLLGTS	1	0.528503	0.0643399	0.536992	0.28627	0.918405	0.211659	0.474086	0.09038
821	ASTL_Y279	ASTL	Y279			RVLKLYGCSPS	1	0.566356	0.132066	0.929555	0.180398	0.894755	0.277335	0.721191	0.224776
822	ASTL_Y279_K277Q	ASTL	Y279	K277Q		RVLQLYGCSPS	1	0.492603	0.106363	0.727084	0.167515	0.852846	0.137864	0.653338	0.0920614
823	ATM_Y1415	ATM	Y1415			KSPDSYQKILL	1	1.23947	0.159039	0.631054	0.245686	0.805169	0.213247	0.441475	0.204422
824	ATM_Y1415_L1420F	ATM	Y1415	L1420F		KSPDSYQKILF	1	1.96397	0.499057	1.74654	0.867738	1.26017	0.273934	0.633958	0.407529
825	ATM_Y1415_L1420P	ATM	Y1415	L1420P		KSPDSYQKILP	1	1.44994	0.266565	0.687784	0.343244	0.947349	0.297621	0.640606	0.309864
826	ATM_Y1915	ATM	Y1915			LAVVDYMRRQK	1	0.531279	0.327832	0.652238	0.198957	0.675161	0.451649	0.433912	0.319808
827	ATM_Y1915_L1910H	ATM	Y1915	L1910H		HAVVDYMRRQK	1	0.381272	0.0860585	0.363848	0.220002	0.599534	0.325713	0.261383	0.158567
828	ATM_Y1915_M1916I	ATM	Y1915	M1916I		LAVVDYIRRQK	1	0.338058	0.263206	0.460966	0.0870934	0.441312	0.295764	0.211026	0.172402
829	ATM_Y1915_V1913G	ATM	Y1915	V1913G		LAVGDYMRRQK	1	0.369826	0.204117	0.695223	0.156393	0.596549	0.103866	0.394428	0.211472
830	ATM_Y2019	ATM	Y2019			EPDSLYGCGGG	1	0.618737	0.204518	0.853993	0.280965	0.976599	0.219052	0.656932	0.303212
831	ATM_Y2019_D2016G	ATM	Y2019	D2016G		EPGSLYGCGGG	1	0.589022	0.182275	0.695225	0.0836709	1.2412	0.192527	0.794044	0.063784
832	ATM_Y2019_G2023R	ATM	Y2019	G2023R		EPDSLYGCGRG	1	0.558918	0.104185	0.886483	0.0426011	0.93006	0.199035	0.532751	0.164213
833	ATM_Y2969	ATM	Y2969			PLKALYLQQRP	1	0.914258	0.0909094	1.07515	0.471413	1.30462	0.277282	2.00047	0.765216
834	ATM_Y2969_P2974L	ATM	Y2969	P2974L		PLKALYLQQRL	1	0.800471	0.178165	1.17072	0.279527	1.2045	0.212824	1.13262	0.155664
835	ATM_Y332	ATM	Y332			GSRGKYSSGFR	1	0.833483	0.403741	0.912271	0.370529	1.14584	0.649077	0.554268	0.279551
836	ATM_Y332_R337C	ATM	Y332	R337C		GSRGKYSSGFC	1	0.938466	0.516233	1.15642	0.415519	1.2451	0.152193	0.731674	0.223992
837	ATM_Y332_R337H	ATM	Y332	R337H		GSRGKYSSGFH	1	0.904977	0.540165	0.648686	0.125794	1.0407	0.352147	0.597069	0.184388
838	ATM_Y332_S333F	ATM	Y332	S333F		GSRGKYFSGFR	1	0.543784	0.153487	0.833161	0.44064	0.962697	0.127588	0.358053	0.139061
839	ATM_Y332_Y332C	ATM	Y332	Y332C		GSRGKCSSGFR	0	0.914909	0.276171	0.712928	0.251422	1.05944	0.188849	0.65958	0.219136
840	ATM_Y54	ATM	Y54			SKQGKYLNWDA	1	0.652963	0.126174	0.819711	0.230729	6.00851	4.93508	0.624734	0.250946
841	ATM_Y54_S49C	ATM	Y54	S49C		CKQGKYLNWDA	1	0.734521	0.162164	1.23858	0.629111	5.57568	4.15066	0.679638	0.206419
842	ATP13A2_Y50	ATP13A2	Y50			WRVIGYHVVVW	1	0.727292	0.267126	0.915233	0.13138	1.0782	0.237374	0.677805	0.31982
843	ATP13A2_Y50_G49S	ATP13A2	Y50	G49S		WRVISYHVVVW	1	0.619331	0.0994847	0.994086	0.392025	1.08273	0.353961	0.892282	0.435642
844	ATP2A2_Y407	ATP2A2	Y407			VNCHQYDGLVE	1	12.4825	1.78543	0.982936	0.168696	1.18049	0.357037	0.812489	0.332892
845	ATP2A2_Y407_E412G	ATP2A2	Y407	E412G		VNCHQYDGLVG	1	11.1256	2.81245	0.685979	0.143843	0.785439	0.239524	0.900412	0.223353
846	ATP2A2_Y497	ATP2A2	Y497			KSMSVYCTPNK	1	0.948372	0.256649	0.686414	0.152952	1.08534	0.405372	0.679901	0.198701
847	ATP2A2_Y497_S495F	ATP2A2	Y497	S495F		KSMFVYCTPNK	1	0.678817	0.265463	0.483708	0.189562	0.925494	0.19	0.637815	0.281608
848	ATP2A2_Y836	ATP2A2	Y836			WLFFRYLAIGC	1	0.360079	0.0887151	0.572816	0.120394	0.825699	0.129365	0.424967	0.178807
849	ATP2A2_Y836_A838P	ATP2A2	Y836	A838P		WLFFRYLPIGC	1	0.795968	0.138616	1.36091	0.156644	1.25745	0.17938	0.830266	0.273589
850	ATP2C1_Y452	ATP2C1	Y452			IRKAEYPFSSE	1	0.471492	0.162943	0.597604	0.453411	0.889678	0.181731	0.475261	0.293152
851	ATP2C1_Y452_A450T	ATP2C1	Y452	A450T		IRKTEYPFSSE	1	0.586957	0.140793	0.806534	0.155512	0.928174	0.14156	0.53679	0.278975
852	ATP5F1B_Y269	ATP5F1B	Y269			KVALVYGQMNE	1	0.570161	0.180198	0.733572	0.345316	0.850822	0.168733	0.91977	0.131203
853	ATP5F1B_Y269_E274Q	ATP5F1B	Y269	E274Q		KVALVYGQMNQ	1	0.433712	0.0931658	0.636495	0.0644611	0.703388	0.0937248	1.02966	0.314914
854	ATP6V0A2_Y688	ATP6V0A2	Y688			VNRSGYTLIRK	1	1.74133	0.872448	0.813871	0.180243	0.560409	0.252324	0.371109	0.183838
855	ATP6V0A2_Y688_R685Q	ATP6V0A2	Y688	R685Q		VNQSGYTLIRK	1	8.52044	2.69975	9.29606	3.15801	0.860628	0.12473	1.01304	0.248251
856	ATP6V0D2_Y271	ATP6V0D2	Y271			NVADHYGVYKP	2	0.5969	0.293172	0.646699	0.19265	0.91735	0.0391315	2.01033	0.335696
857	ATP6V0D2_Y271_G272R	ATP6V0D2	Y271	G272R		NVADHYRVYKP	2	0.469475	0.00388167	0.516963	0.242405	0.618737	0.116813	0.626366	0.259804
858	ATP6V0D2_Y271_G272R_YF	ATP6V0D2	Y271	G272R	YF	NVADHYRVFKP	1	0.396937	0.201528	0.62396	0.116861	0.841819	0.21191	0.485272	0.311492
859	ATP6V0D2_Y271_YF	ATP6V0D2	Y271		YF	NVADHYGVFKP	1	0.716862	0.470098	0.96041	0.300278	1.06152	0.451327	0.517948	0.301859
860	ATP6V1A_Y374	ATP6V1A	Y374			PADSGYPAYLG	2	0.613873	0.127409	0.620017	0.348436	1.11497	0.439029	0.904145	0.319753
861	ATP6V1A_Y374_D371G	ATP6V1A	Y374	D371G		PAGSGYPAYLG	2	0.395886	0.145051	0.688413	0.320701	0.883625	0.38281	0.880293	0.26131
862	ATP6V1A_Y374_D371G_YF	ATP6V1A	Y374	D371G	YF	PAGSGYPAFLG	1	0.537684	0.143931	0.777603	0.368104	0.828069	0.178877	0.485393	0.267481
863	ATP6V1A_Y374_YF	ATP6V1A	Y374		YF	PADSGYPAFLG	1	0.422953	0.168043	0.502164	0.198751	0.764508	0.236599	0.463803	0.254961
864	ATP6V1B1_Y462	ATP6V1B1	Y462			INQGPYENRSV	1	0.532015	0.0381455	0.643489	0.273805	1.19848	0.333873	0.841874	0.251786
865	ATP6V1B1_Y462_R465H	ATP6V1B1	Y462	R465H		INQGPYENHSV	1	2.06979	0.463236	0.77681	0.375321	4.77206	2.24543	1.38256	0.312261
866	ATP7A_Y1459	ATP7A	Y1459			DRIVNYSRASI	1	0.498484	0.181008	0.880189	0.165478	0.767993	0.294881	0.66334	0.214771
867	ATP7A_Y1459_I1464V	ATP7A	Y1459	I1464V		DRIVNYSRASV	1	0.532749	0.135277	0.705509	0.341356	0.766379	0.0368591	0.619637	0.0659947
868	ATP7B_Y1078	ATP7B	Y1078			VAVTKYCKEEL	1	0.530089	0.114511	0.728541	0.113117	0.813329	0.180727	0.477973	0.251721
869	ATP7B_Y1078_A1074V	ATP7B	Y1078	A1074V		VVVTKYCKEEL	1	0.368877	0.065654	0.609086	0.0814112	0.637016	0.187376	0.406351	0.0964495
870	ATP7B_Y1078_L1083F	ATP7B	Y1078	L1083F		VAVTKYCKEEF	1	0.500574	0.178284	0.598354	0.0963466	0.861797	0.0362391	0.494458	0.300682
871	ATP8B1_Y658	ATP8B1	Y658			TLCLCYKEIEE	1	1.29188	0.067513	0.936524	0.345123	0.920575	0.228344	0.745539	0.290526
872	ATP8B1_Y658_I661T	ATP8B1	Y658	I661T		TLCLCYKETEE	1	0.496051	0.11581	0.671523	0.155921	0.782601	0.0907352	0.6881	0.0722093
873	ATR_Y317	ATR	Y317			NIEPVYLNMLL	1	0.401634	0.113954	1.0399	0.688576	0.836164	0.0580273	0.466448	0.175472
874	ATR_Y317_V316I	ATR	Y317	V316I		NIEPIYLNMLL	1	0.423967	0.0464017	0.630067	0.0556627	0.704741	0.119626	0.483689	0.189595
875	ATRX_Y1849	ATRX	Y1849			CKLYQYYLDHL	3	0.391115	0.090282	0.522744	0.253271	0.73121	0.176727	0.754894	0.0607415
876	ATRX_Y1849_Y1847C	ATRX	Y1849	Y1847C		CKLCQYYLDHL	2	1.39376	0.641796	1.66759	0.180738	1.53578	0.272585	1.5065	0.575605
877	ATRX_Y1849_Y1847C_YF	ATRX	Y1849	Y1847C	YF	CKLCQYFLDHL	1	1.09956	0.574314	1.18155	0.194526	1.46336	0.166862	1.02183	0.339973
878	ATRX_Y1849_YF	ATRX	Y1849		YF	CKLFQYFLDHL	1	1.34022	0.494728	1.40939	0.0630865	1.56781	0.271257	1.11582	0.362595
879	ATRX_Y203	ATRX	Y203			KNCFKYYMSDD	2	0.835488	0.376317	0.784828	0.236608	0.827804	0.127765	1.50027	0.726394
880	ATRX_Y203_C200S	ATRX	Y203	C200S		KNSFKYYMSDD	2	0.707965	0.0983329	0.661127	0.265672	0.847754	0.383716	1.24568	0.0690529
881	ATRX_Y203_C200S_YF	ATRX	Y203	C200S	YF	KNSFKYFMSDD	1	0.556449	0.150598	0.587233	0.444177	0.941583	0.331448	0.631989	0.267317
882	ATRX_Y203_YF	ATRX	Y203		YF	KNCFKYFMSDD	1	0.545983	0.114668	0.52937	0.174683	0.8034	0.0442162	1.12907	0.320036
883	ATRX_Y204	ATRX	Y204			NCFKYYMSDDI	2	1.51891	0.755872	0.799479	0.179659	0.970004	0.204936	2.06103	0.877429
884	ATRX_Y204_C200S	ATRX	Y204	C200S		NSFKYYMSDDI	2	1.05517	0.035421	0.745777	0.171034	0.9434	0.198019	2.7558	0.381554
885	ATRX_Y204_C200S_YF	ATRX	Y204	C200S	YF	NSFKFYMSDDI	1	0.604105	0.256154	0.789571	0.430524	0.981559	0.157029	0.640755	0.3059
886	ATRX_Y204_YF	ATRX	Y204		YF	NCFKFYMSDDI	1	0.688936	0.0762904	0.720717	0.209752	0.9734	0.184591	0.631114	0.214714
887	ATRX_Y2083	ATRX	Y2083			LRNIDYYRLDG	2	0.774651	0.134766	11.9253	5.76461	0.873924	0.0993938	2.42268	2.3512
888	ATRX_Y2083_Y2084H	ATRX	Y2083	Y2084H		LRNIDYHRLDG	1	0.713912	0.063006	1.25505	0.0807838	0.72527	0.171995	0.769646	0.128293
889	ATRX_Y2083_YF	ATRX	Y2083		YF	LRNIDYFRLDG	1	0.595491	0.331442	22.5507	9.47975	0.760798	0.333828	1.11974	0.160016
890	AVPR2_Y117	AVPR2	Y117			CRAVKYLQMVG	1	0.52131	0.139467	1.24349	0.0859379	0.963559	0.206445	0.592032	0.266718
891	AVPR2_Y117_C112R	AVPR2	Y117	C112R		RRAVKYLQMVG	1	0.525012	0.261437	0.694502	0.577028	0.840139	0.381579	0.363155	0.257685
892	AVPR2_Y117_C112Y	AVPR2	Y117	C112Y		YRAVKYLQMVG	2	0.372463	0.0951915	2.3327	0.657121	0.709464	0.223016	0.492009	0.167326
893	AVPR2_Y117_C112Y_YF	AVPR2	Y117	C112Y	YF	FRAVKYLQMVG	1	0.551877	0.22351	3.15241	1.13248	0.960027	0.201982	0.594413	0.118597
894	AVPR2_Y117_G122D	AVPR2	Y117	G122D		CRAVKYLQMVD	1	0.531589	0.0374874	0.755022	0.136613	0.797741	0.117402	0.530483	0.280605
895	AVPR2_Y117_G122R	AVPR2	Y117	G122R		CRAVKYLQMVR	1	0.620325	0.106701	1.24921	0.157087	1.01091	0.240361	0.667727	0.280182
896	AVPR2_Y117_R113W	AVPR2	Y117	R113W		CWAVKYLQMVG	1	0.920119	0.544122	1.19725	0.438538	1.2596	0.0115614	1.08925	0.166445
897	AVPR2_Y124	AVPR2	Y124			QMVGMYASSYM	2	1.22671	0.51069	0.945652	0.410968	0.805512	0.225977	3.67646	2.47603
898	AVPR2_Y124_G122D	AVPR2	Y124	G122D		QMVDMYASSYM	2	1.33464	0.113163	0.602436	0.104832	0.741707	0.121988	2.9511	2.70819
899	AVPR2_Y124_G122D_YF	AVPR2	Y124	G122D	YF	QMVDMYASSFM	1	0.706885	0.129065	0.575416	0.377588	1.06823	0.671289	1.42902	0.733334
900	AVPR2_Y124_G122R	AVPR2	Y124	G122R		QMVRMYASSYM	2	0.454896	0.111672	0.639512	0.121246	0.89932	0.131992	1.64689	1.01581
901	AVPR2_Y124_G122R_YF	AVPR2	Y124	G122R	YF	QMVRMYASSFM	1	0.570889	0.121147	0.774029	0.556349	0.831325	0.375927	0.985349	0.218379
902	AVPR2_Y124_M123K	AVPR2	Y124	M123K		QMVGKYASSYM	2	0.65366	0.251812	1.20712	0.247239	1.01958	0.161906	1.343	0.348717
903	AVPR2_Y124_M123K_YF	AVPR2	Y124	M123K	YF	QMVGKYASSFM	1	0.466797	0.12729	0.731785	0.357091	0.893556	0.191488	0.730832	0.159401
904	AVPR2_Y124_S126F	AVPR2	Y124	S126F		QMVGMYAFSYM	2	0.562468	0.185485	0.65129	0.116281	0.637788	0.0522831	1.13058	0.921892
905	AVPR2_Y124_S126F_YF	AVPR2	Y124	S126F	YF	QMVGMYAFSFM	1	0.353416	0.0878738	0.816688	0.0922492	0.653846	0.133721	0.530481	0.0996482
906	AVPR2_Y124_S127F	AVPR2	Y124	S127F		QMVGMYASFYM	2	0.538293	0.166102	0.841666	0.488991	0.784048	0.125653	0.635914	0.04825
907	AVPR2_Y124_S127F_YF	AVPR2	Y124	S127F	YF	QMVGMYASFFM	1	0.602215	0.0655124	0.782486	0.331512	0.641561	0.385633	0.478937	0.0987153
908	AVPR2_Y124_Y128S	AVPR2	Y124	Y128S		QMVGMYASSSM	1	0.684731	0.0989353	0.756253	0.345578	0.868647	0.189638	1.32649	0.151122
909	AVPR2_Y124_YF	AVPR2	Y124		YF	QMVGMYASSFM	1	0.548351	0.100657	0.637188	0.246921	0.625658	0.115628	1.01401	0.519033
910	AXL_Y115	AXL	Y115			SDTGQYQCLVF	1	0.449067	0.0672969	0.563499	0.143536	0.582353	0.164936	0.484213	0.128613
911	AXL_Y115_T112M	AXL	Y115	T112M		SDMGQYQCLVF	1	0.437395	0.134211	0.916286	0.322863	0.726287	0.0582693	0.505451	0.214692
912	B3GALNT1_Y269	B3GALNT1	Y269			KFEDVYVGICL	1	0.458263	0.229023	0.409801	0.158123	0.647374	0.265794	0.581099	0.177687
913	B3GALNT1_Y269_E266A	B3GALNT1	Y269	E266A		KFADVYVGICL	1	0.42333	0.119766	0.36928	0.120918	0.731116	0.00706011	0.436804	0.14485
914	B3GALNT1_Y269_G271R	B3GALNT1	Y269	G271R		KFEDVYVRICL	1	0.471663	0.15277	0.757665	0.154798	0.815594	0.0551389	0.573656	0.205019
915	B4GALNT2_Y538	B4GALNT2	Y538			ALEKTYNTYRS	2	0.44762	0.150556	0.612287	0.368587	0.818768	0.172226	1.37429	0.68406
916	B4GALNT2_Y538_A533D	B4GALNT2	Y538	A533D		DLEKTYNTYRS	2	0.429762	0.165923	0.510626	0.124314	0.653734	0.0866757	0.867964	0.139697
917	B4GALNT2_Y538_A533D_YF	B4GALNT2	Y538	A533D	YF	DLEKTYNTFRS	1	0.506339	0.0827052	0.629244	0.116985	0.846227	0.239053	0.753265	0.0997144
918	B4GALNT2_Y538_YF	B4GALNT2	Y538		YF	ALEKTYNTFRS	1	0.457199	0.0799076	0.591079	0.29292	0.871777	0.159682	0.643592	0.218993
919	B4GALT4_Y113	B4GALT4	Y113			VSRGRYRPQEC	1	0.430042	0.115439	0.408966	0.114381	0.619904	0.213801	0.320038	0.154355
920	B4GALT4_Y113_Q116E	B4GALT4	Y113	Q116E		VSRGRYRPEEC	1	0.428068	0.138303	0.464806	0.26635	0.698809	0.114908	0.277103	0.127523
921	B4GALT6_Y382	B4GALT6	Y382			APIEDYGGGGG	1	0.501033	0.320678	0.626662	0.141517	0.7017	0.0812253	0.543128	0.220291
922	B4GALT6_Y382_I379V	B4GALT6	Y382	I379V		APVEDYGGGGG	1	0.42458	0.158173	0.768476	0.154398	0.763846	0.249662	0.648016	0.241479
923	BACE1_Y260	BACE1	Y260			RREWYYEVIIV	2	0.544684	0.145842	0.749829	0.231083	0.872756	0.26319	0.608968	0.253163
924	BACE1_Y260_V265A	BACE1	Y260	V265A		RREWYYEVIIA	2	0.415013	0.177779	0.550395	0.352581	0.672931	0.248788	0.247755	0.0958629
925	BACE1_Y260_V265A_YF	BACE1	Y260	V265A	YF	RREWFYEVIIA	1	0.512095	0.169317	0.605383	0.157249	0.807202	0.142361	0.471483	0.372273
926	BACE1_Y260_YF	BACE1	Y260		YF	RREWFYEVIIV	1	0.525834	0.162333	0.741202	0.265515	0.92728	0.0740917	0.455552	0.277762
927	BAD_Y110	BAD	Y110			WAAQRYGRELR	1	0.507525	0.126878	0.583362	0.18749	0.757561	0.335156	0.446371	0.296237
928	BAD_Y110_A107S	BAD	Y110	A107S		WASQRYGRELR	1	0.324473	0.104396	0.50419	0.264138	0.860504	0.108658	0.290225	0.204931
929	BAG3_Y114	BAG3	Y114			HPFHVYPQPGM	1	0.8832	0.266716	0.790238	0.0980501	1.04728	0.19752	0.641318	0.318616
930	BAG3_Y114_P115S	BAG3	Y114	P115S		HPFHVYSQPGM	1	18.1049	4.7109	0.805769	0.389978	1.38808	0.477982	1.26726	0.196834
931	BAG3_Y205	BAG3	Y205			QLPRGYISIPV	1	0.887258	0.155922	0.99319	0.317292	0.735842	0.17023	0.603496	0.20609
932	BAG3_Y205_P209L	BAG3	Y205	P209L		QLPRGYISILV	1	0.599843	0.171623	0.682461	0.300077	1.04423	0.288349	0.683021	0.209656
933	BAG3_Y451	BAG3	Y451			KTDKKYLMIEE	1	0.472596	0.0942045	0.573181	0.284576	0.761888	0.136915	0.441632	0.191454
934	BAG3_Y451_E455K	BAG3	Y451	E455K		KTDKKYLMIKE	1	0.498861	0.0862422	0.836252	0.322479	0.897171	0.223666	0.518911	0.203502
935	BAG3_Y457	BAG3	Y457			LMIEEYLTKEL	1	0.514484	0.163746	1.16072	0.78449	0.981276	0.488721	0.722556	0.331383
936	BAG3_Y457_E455K	BAG3	Y457	E455K		LMIKEYLTKEL	1	0.621379	0.330227	1.00508	0.066653	1.03156	0.150813	0.516622	0.0852139
937	BAG3_Y457_L462P	BAG3	Y457	L462P		LMIEEYLTKEP	1	0.55246	0.259626	0.952801	0.880305	0.742687	0.1758	0.35947	0.160259
938	BAG3_Y93	BAG3	Y93			QLRPGYIPIPV	1	0.492799	0.0767567	0.585312	0.270753	0.847608	0.260478	0.566362	0.366676
939	BAG3_Y93_I94F	BAG3	Y93	I94F		QLRPGYFPIPV	1	0.475007	0.133504	0.906253	0.275215	0.697021	0.274317	1.6512	0.531795
940	BAP1_Y223	BAP1	Y223			TAGEPYHDIRF	1	1.93635	0.183754	0.776313	0.232458	0.898956	0.281869	0.744567	0.247633
941	BAP1_Y223_R227C	BAP1	Y223	R227C		TAGEPYHDICF	1	1.46815	0.255089	0.611309	0.22315	0.905835	0.385293	0.594605	0.293007
942	BARD1_Y156	BARD1	Y156			SKKVRYVVSKA	1	1.32388	0.481005	1.16465	0.435145	1.3779	0.298259	0.85797	0.376533
943	BARD1_Y156_K153E	BARD1	Y156	K153E		SKEVRYVVSKA	1	0.6082	0.208879	0.73313	0.252523	0.946844	0.198023	0.538428	0.260816
944	BBS10_Y536	BBS10	Y536			NRLTDYYEPLL	2	1.92604	0.254805	0.755082	0.570829	0.78776	0.23707	0.691224	0.183347
945	BBS10_Y536_P539L	BBS10	Y536	P539L		NRLTDYYELLL	2	1.15793	0.0410922	0.830372	0.181265	1.18809	0.212951	0.774441	0.31661
946	BBS10_Y536_P539L_YF	BBS10	Y536	P539L	YF	NRLTDYFELLL	1	0.834394	0.069508	1.28727	0.340094	1.32556	0.259026	0.622879	0.290142
947	BBS10_Y536_YF	BBS10	Y536		YF	NRLTDYFEPLL	1	0.710781	0.089135	0.842383	0.363289	1.01709	0.0546336	0.489887	0.155712
948	BBS2_Y644	BBS2	Y644			TMKSRYMELYD	2	4.93316	1.01742	1.20406	0.69657	0.808592	0.242513	1.97117	0.97994
949	BBS2_Y644_R643H	BBS2	Y644	R643H		TMKSHYMELYD	2	10.2606	2.71946	1.83654	0.299908	1.21719	0.299092	1.80134	0.858786
950	BBS2_Y644_R643H_YF	BBS2	Y644	R643H	YF	TMKSHYMELFD	1	7.05973	0.777438	1.47905	0.0470339	0.824222	0.113881	0.585092	0.20919
951	BBS2_Y644_YF	BBS2	Y644		YF	TMKSRYMELFD	1	4.88992	1.26605	0.634302	0.214146	0.944842	0.229746	0.660625	0.0868008
952	BBS2_Y648	BBS2	Y648			RYMELYDLNRD	2	5.57497	1.66244	0.800355	0.227372	0.988869	0.108397	1.01216	0.235449
953	BBS2_Y648_R643H	BBS2	Y648	R643H		HYMELYDLNRD	2	2.43566	0.132712	1.33376	0.161234	1.0696	0.638911	0.918857	0.220043
954	BBS2_Y648_R643H_YF	BBS2	Y648	R643H	YF	HFMELYDLNRD	1	0.653937	0.309309	1.50795	0.406251	1.24973	0.419918	0.909203	0.55257
955	BBS2_Y648_YF	BBS2	Y648		YF	RFMELYDLNRD	1	0.562798	0.384805	1.05723	0.495173	1.01903	0.303557	0.660185	0.0478171
956	BBS4_Y395	BBS4	Y395			NALAQYQEMEK	1	3.06926	0.21483	0.807938	0.137791	0.794687	0.153319	0.61371	0.180326
957	BBS4_Y395_A393V	BBS4	Y395	A393V		NALVQYQEMEK	1	4.64807	0.840357	0.745389	0.201562	1.03713	0.380559	0.751842	0.0845135
958	BBS4_Y43	BBS4	Y43			LIHLHYIRKDY	2	1.70936	0.851054	1.87568	0.68099	1.6922	0.035191	1.64147	0.635061
959	BBS4_Y43_K46R	BBS4	Y43	K46R		LIHLHYIRRDY	2	0.762886	0.121823	1.16828	0.344451	1.51668	0.918817	0.638499	0.420563
960	BBS4_Y43_K46R_YF	BBS4	Y43	K46R	YF	LIHLHYIRRDF	1	0.854283	0.149095	0.817422	0.390714	1.28176	0.590831	0.554714	0.478544
961	BBS4_Y43_YF	BBS4	Y43		YF	LIHLHYIRKDF	1	1.60267	0.763156	2.75348	1.44477	2.06339	1.19147	2.23993	1.56377
962	BBS4_Y48	BBS4	Y48			YIRKDYEACKA	2	0.795573	0.453879	1.10742	0.771124	0.981875	0.544747	0.905649	0.538547
963	BBS4_Y48_K46R	BBS4	Y48	K46R		YIRRDYEACKA	2	0.513947	0.183301	0.916844	0.329165	0.479855	0.102329	0.420864	0.295318
964	BBS4_Y48_K46R_YF	BBS4	Y48	K46R	YF	FIRRDYEACKA	1	0.682154	0.487712	1.01523	0.310241	0.91776	0.341344	0.463313	0.335562
965	BBS4_Y48_YF	BBS4	Y48		YF	FIRKDYEACKA	1	0.792367	0.118154	0.730993	0.285902	1.07135	0.129785	0.848023	0.21979
966	BCAR1_Y410	BCAR1	Y410			VDSGVYAVPPP	1	0.433718	0.133454	0.623563	0.291147	0.862869	0.134057	0.469149	0.265042
967	BCAR1_Y410_S407T	BCAR1	Y410	S407T		VDTGVYAVPPP	1	0.556069	0.0790877	0.601525	0.132977	0.774514	0.0753281	0.52467	0.285851
968	BCCIP_Y257	BCCIP	Y257			EEEFFYEKAIL	1	0.655032	0.288253	0.685402	0.25385	0.98132	0.0787619	0.400185	0.283415
969	BCCIP_Y257_E254Q	BCCIP	Y257	E254Q		EEQFFYEKAIL	1	0.530299	0.0127851	0.79473	0.199435	1.04312	0.242865	0.533569	0.271308
970	BCHE_Y174	BCHE	Y174			VVSMNYRVGAL	1	0.445791	0.0849551	0.771384	0.187945	0.475421	0.0510355	0.422064	0.134715
971	BCHE_Y174_V170M	BCHE	Y174	V170M		VMSMNYRVGAL	1	0.461296	0.134095	0.775024	0.15189	0.718918	0.0979621	0.578144	0.150106
972	BCHE_Y505	BCHE	Y505			ANFAKYGNPNE	1	0.381736	0.128498	0.600414	0.106458	0.783896	0.132183	0.380954	0.190511
973	BCHE_Y505_F502L	BCHE	Y505	F502L		ANLAKYGNPNE	1	0.424574	0.252505	0.63859	0.110028	0.644759	0.11638	0.492874	0.225556
974	BCKDHA_Y345	BCKDHA	Y345			DDSSAYRSVDE	1	0.8863	0.214252	0.76472	0.399617	0.793815	0.240762	0.822069	0.196217
975	BCKDHA_Y345_R346C	BCKDHA	Y345	R346C		DDSSAYCSVDE	1	1.2057	0.121512	0.726926	0.263919	1.00417	0.340184	0.593322	0.371223
976	BCL2_Y9	BCL2	Y9			AGRTGYDNREI	1	0.504082	0.168906	0.718163	0.0936429	0.779452	0.208266	0.540422	0.231972
977	BCL2_Y9_T7S	BCL2	Y9	T7S		AGRSGYDNREI	1	0.493773	0.100817	0.757468	0.309368	0.731015	0.252855	0.487217	0.243288
978	BCL6_Y157	BCL6	Y157			QDIMAYRGREV	1	0.447114	0.123349	0.729282	0.0723733	0.768611	0.228727	0.340866	0.197755
979	BCL6_Y157_G159S	BCL6	Y157	G159S		QDIMAYRSREV	1	0.420437	0.307582	0.954988	0.618042	0.698982	0.465116	0.385728	0.320446
980	BCLAF1_Y459	BCLAF1	Y459			REEKNYKLKET	1	0.626847	0.260778	0.956422	0.738048	1.15827	0.535242	0.519529	0.252807
981	BCLAF1_Y459_L461H	BCLAF1	Y459	L461H		REEKNYKHKET	1	0.623876	0.0966001	0.459725	0.417619	0.930227	0.253031	0.477708	0.163806
982	BCLAF1_Y459_Y459D	BCLAF1	Y459	Y459D		REEKNDKLKET	0	0.551889	0.298836	0.746675	0.166281	1.16402	0.122835	0.578299	0.362196
983	BCLAF1_Y466	BCLAF1	Y466			LKETGYVVERP	1	0.500731	0.188199	0.68034	0.208722	0.86181	0.0734843	0.637821	0.373638
984	BCLAF1_Y466_L461H	BCLAF1	Y466	L461H		HKETGYVVERP	1	0.394357	0.188373	0.401219	0.17983	0.747281	0.318562	0.709361	0.25183
985	BCO1_Y264	BCO1	Y264			KMATAYIRRMS	1	0.388825	0.286084	0.496591	0.130573	0.592998	0.277865	0.279788	0.193893
986	BCO1_Y264_R267S	BCO1	Y264	R267S		KMATAYIRSMS	1	0.46388	0.115165	0.590368	0.162242	1.07889	0.106521	0.492988	0.268771
987	BCO2_Y294	BCO2	Y294			GMTRNYIIFIE	1	1.18377	0.187878	1.32194	0.256671	1.33626	0.244918	1.03669	0.685643
988	BCO2_Y294_G289E	BCO2	Y294	G289E		EMTRNYIIFIE	1	0.625138	0.059919	0.902918	0.449691	1.18776	0.319918	0.641935	0.324714
989	BCOR_Y90	BCOR	Y90			PGNIVYSSLCG	1	0.579101	0.0779877	1.50664	0.418022	0.874593	0.47647	0.606939	0.199675
990	BCOR_Y90_P85L	BCOR	Y90	P85L		LGNIVYSSLCG	1	0.550882	0.0596302	1.43712	0.386266	0.777932	0.133086	0.535643	0.192438
991	BCR_Y1089	BCR	Y1089			EEVGIYRVSGV	1	0.491365	0.281993	0.520957	0.308108	0.731998	0.280911	1.13865	0.3392
992	BCR_Y1089_V1091M	BCR	Y1089	V1091M		EEVGIYRMSGV	1	0.430653	0.15513	0.957407	0.392241	0.744288	0.0637322	1.09666	0.0750415
993	BCR_Y554	BCR	Y554			KVPELYEIHKE	1	0.700598	0.291547	0.75089	0.0498193	0.995552	0.111122	0.538063	0.27976
994	BCR_Y554_K558T	BCR	Y554	K558T		KVPELYEIHTE	1	0.524696	0.328985	0.696223	0.379989	0.968643	0.157812	0.50685	0.289989
995	BCR_Y561	BCR	Y561			IHKEFYDGLFP	1	0.912894	0.191023	0.769703	0.174773	0.946105	0.0663389	1.19989	0.138843
996	BCR_Y561_K558T	BCR	Y561	K558T		IHTEFYDGLFP	1	0.630289	0.166433	0.459106	0.243784	0.819884	0.125352	0.554867	0.0784961
997	BCR_Y751	BCR	Y751			GKTQQYDCKWY	2	0.757831	0.139046	0.60096	0.18042	0.80468	0.267381	1.12468	0.316303
998	BCR_Y751_D752E	BCR	Y751	D752E		GKTQQYECKWY	2	0.735158	0.225895	0.584424	0.0589254	0.676737	0.0877177	0.831334	0.185573
999	BCR_Y751_D752E_YF	BCR	Y751	D752E	YF	GKTQQYECKWF	1	0.487964	0.0646397	0.528986	0.210985	0.693552	0.07647	0.801739	0.0179603
1000	BCR_Y751_YF	BCR	Y751		YF	GKTQQYDCKWF	1	0.466239	0.0916606	0.623967	0.0529587	0.826219	0.231749	0.817366	0.101352
1001	BCR_Y756	BCR	Y756			YDCKWYIPLTD	2	0.596978	0.115983	0.706557	0.119331	0.862931	0.252538	1.20446	0.137037
1002	BCR_Y756_D752E	BCR	Y756	D752E		YECKWYIPLTD	2	0.476539	0.0697957	0.665298	0.204975	0.704294	0.156218	0.711258	0.139276
1003	BCR_Y756_D752E_YF	BCR	Y756	D752E	YF	FECKWYIPLTD	1	0.560779	0.22049	0.817136	0.433625	0.685053	0.203628	0.564752	0.142935
1004	BCR_Y756_YF	BCR	Y756		YF	FDCKWYIPLTD	1	0.482009	0.0509816	0.744642	0.232277	0.77206	0.129462	0.651752	0.154728
1005	BCR_Y910	BCR	Y910			ESPGLYGFLNV	1	0.479267	0.181015	0.598108	0.22812	0.822409	0.162311	0.462042	0.199719
1006	BCR_Y910_Y910C	BCR	Y910	Y910C		ESPGLCGFLNV	0	0.377149	0.0705402	0.629636	0.129064	0.621555	0.160377	0.419541	0.19171
1007	BCS1L_Y181	BCS1L	Y181			WRPFGYPRRRR	1	0.349314	0.173178	0.659565	0.260051	0.730771	0.247364	0.321789	0.169126
1008	BCS1L_Y181_R183C	BCS1L	Y181	R183C		WRPFGYPCRRR	1	0.435464	0.187297	0.488052	0.261566	0.745533	0.190614	0.306559	0.172642
1009	BCS1L_Y181_R183H	BCS1L	Y181	R183H		WRPFGYPHRRR	1	0.47765	0.191119	0.632855	0.31093	0.661729	0.188383	0.270187	0.147356
1010	BCS1L_Y181_R184C	BCS1L	Y181	R184C		WRPFGYPRCRR	1	0.459291	0.101267	0.390382	0.0807298	0.714005	0.177359	0.320215	0.180642
1011	BEST1_Y131	BEST1	Y131			RTLIRYANLGN	1	0.802046	0.195982	1.1253	0.50582	3.12523	0.624639	0.46878	0.21032
1012	BEST1_Y131_G135S	BEST1	Y131	G135S		RTLIRYANLSN	1	1.58861	0.436279	8.48754	3.42875	6.10859	4.51749	0.612614	0.305526
1013	BEST1_Y131_N133K	BEST1	Y131	N133K		RTLIRYAKLGN	1	0.765461	0.403775	1.1089	0.15771	1.13555	0.83452	0.213655	0.194866
1014	BEST1_Y148	BEST1	Y148			VSTAVYKRFPS	1	0.413757	0.145294	0.646684	0.239464	0.747843	0.1378	0.745051	0.287757
1015	BEST1_Y148_A146K	BEST1	Y148	A146K		VSTKVYKRFPS	1	0.655758	0.0812904	0.847868	0.430109	1.10541	0.216111	0.599307	0.384023
1016	BEST1_Y148_P152A	BEST1	Y148	P152A		VSTAVYKRFAS	1	0.490267	0.121473	0.680857	0.131701	0.643822	0.0323458	0.33456	0.234067
1017	BEST1_Y227	BEST1	Y227			GHLYAYDWISI	2	1.76092	0.684286	1.31493	0.218804	1.55652	0.174218	1.31198	0.267297
1018	BEST1_Y227_D228N	BEST1	Y227	D228N		GHLYAYNWISI	2	0.738099	0.250405	0.815866	0.294434	0.943969	0.347264	0.840968	0.146501
1019	BEST1_Y227_D228N_YF	BEST1	Y227	D228N	YF	GHLFAYNWISI	1	0.915545	0.225255	1.13445	0.3655	0.993187	0.192667	0.969053	0.235922
1020	BEST1_Y227_G222V	BEST1	Y227	G222V		VHLYAYDWISI	2	1.17646	0.500857	1.42424	0.390989	1.47916	0.462976	1.18196	0.393573
1021	BEST1_Y227_G222V_YF	BEST1	Y227	G222V	YF	VHLFAYDWISI	1	0.971823	0.226637	1.36436	0.358099	1.29605	0.16197	1.06452	0.37055
1022	BEST1_Y227_L224M	BEST1	Y227	L224M		GHMYAYDWISI	2	2.41088	1.01588	1.82149	1.13287	1.60261	0.375795	1.97705	0.457165
1023	BEST1_Y227_L224M_YF	BEST1	Y227	L224M	YF	GHMFAYDWISI	1	1.15246	0.0860905	1.03114	0.162885	1.25457	0.239614	0.999211	0.335806
1024	BEST1_Y227_L224P	BEST1	Y227	L224P		GHPYAYDWISI	2	4.10876	0.490282	1.07131	0.204219	1.1054	0.359329	5.00129	1.45552
1025	BEST1_Y227_L224P_YF	BEST1	Y227	L224P	YF	GHPFAYDWISI	1	1.72276	0.128594	0.869336	0.170159	1.35821	0.134634	1.31726	0.445688
1026	BEST1_Y227_S231R	BEST1	Y227	S231R		GHLYAYDWIRI	2	1.9669	0.307679	1.3057	0.225528	1.24908	0.290857	1.59236	0.223196
1027	BEST1_Y227_S231R_YF	BEST1	Y227	S231R	YF	GHLFAYDWIRI	1	1.55863	0.428314	1.42545	0.261185	1.65978	0.307787	1.48363	0.51812
1028	BEST1_Y227_Y227C	BEST1	Y227	Y227C		GHLYACDWISI	1	0.770578	0.306678	0.67562	0.151619	0.79896	0.232105	0.620621	0.129671
1029	BEST1_Y227_Y227C_YF	BEST1	Y227	Y227C	YF	GHLFACDWISI	0	0.749051	0.0349153	0.805618	0.430381	0.944648	0.162784	0.642202	0.338698
1030	BEST1_Y227_Y227N	BEST1	Y227	Y227N		GHLYANDWISI	1	18.3815	7.48697	3.50276	3.59413	24.4615	22.3628	1.24258	0.274156
1031	BEST1_Y227_Y227N_YF	BEST1	Y227	Y227N	YF	GHLFANDWISI	0	0.493434	0.219316	0.708076	0.15931	0.903629	0.308469	0.386058	0.19753
1032	BEST1_Y227_YF	BEST1	Y227		YF	GHLFAYDWISI	1	1.09324	0.147021	1.15556	0.119468	1.36419	0.270876	1.01266	0.549239
1033	BEX1_Y43	BEX1	Y43			LDAGEYCVPRG	1	0.452782	0.0980717	0.714541	0.180206	0.844042	0.21025	0.460852	0.164325
1034	BEX1_Y43_A40V	BEX1	Y43	A40V		LDVGEYCVPRG	1	0.503079	0.0804275	0.69778	0.114593	0.755434	0.164473	0.468918	0.269199
1035	BICD2_Y538	BICD2	Y538			ELANLYHHVCM	1	0.783444	0.228984	0.596649	0.105666	0.672534	0.169414	0.608279	0.224557
1036	BICD2_Y538_C542W	BICD2	Y538	C542W		ELANLYHHVWM	1	0.816107	0.0619057	0.835362	0.0970727	0.86865	0.215963	0.713062	0.138049
1037	BIN1_Y150	BIN1	Y150			RKLVDYDSARH	1	0.386571	0.148617	0.419874	0.298073	1.03315	0.270119	0.634913	0.391367
1038	BIN1_Y150_D151N	BIN1	Y150	D151N		RKLVDYNSARH	1	0.685994	0.154473	0.813787	0.378353	0.97229	0.296908	0.610321	0.394831
1039	BIN1_Y150_R145C	BIN1	Y150	R145C		CKLVDYDSARH	1	0.563966	0.124705	0.591761	0.171735	0.845476	0.187138	0.601106	0.188117
1040	BIN1_Y150_R154Q	BIN1	Y150	R154Q		RKLVDYDSAQH	1	0.541114	0.0601092	0.607152	0.268398	1.09753	0.415907	0.494524	0.216038
1041	BIN1_Y157	BIN1	Y157			SARHHYESLQT	1	34.4344	12.2668	0.952396	0.128657	0.85407	0.302849	0.535241	0.217922
1042	BIN1_Y157_R154Q	BIN1	Y157	R154Q		SAQHHYESLQT	1	36.3935	4.61152	0.902942	0.102615	0.780968	0.0901623	0.699719	0.333014
1043	BIRC3_Y245	BIRC3	Y245			QDTSRYTVSNL	1	0.453013	0.189766	0.539666	0.423829	0.878555	0.328484	0.553883	0.240584
1044	BIRC3_Y245_S248C	BIRC3	Y245	S248C		QDTSRYTVCNL	1	1.29541	0.425127	0.779508	0.139853	0.789527	0.151228	0.76012	0.167525
1045	BLM_Y296	BLM	Y296			FDDDDYDTDFV	1	0.554949	0.268488	0.702094	0.442692	0.802855	0.114392	0.51381	0.283127
1046	BLM_Y296_T298M	BLM	Y296	T298M		FDDDDYDMDFV	1	0.48512	0.21564	0.605764	0.353721	0.794925	0.142145	0.501607	0.287629
1047	BMP15_Y235	BMP15	Y235			AFLLLYFNDTH	1	0.566282	0.216586	0.790487	0.196127	1.01247	0.315572	0.70544	0.139353
1048	BMP15_Y235_Y235C	BMP15	Y235	Y235C		AFLLLCFNDTH	0	0.704381	0.153936	1.00248	0.282039	1.01276	0.206631	0.752941	0.266993
1049	BMPR1A_Y453	BMPR1A	Y453			GIVEEYQLPYY	3	4.35706	0.997639	0.996848	0.624618	0.861951	0.291004	6.26523	1.19215
1050	BMPR1A_Y453_V450M	BMPR1A	Y453	V450M		GIMEEYQLPYY	3	5.4546	2.32056	0.44009	0.170397	0.845207	0.321727	7.76235	2.87121
1051	BMPR1A_Y453_V450M_YF	BMPR1A	Y453	V450M	YF	GIMEEYQLPFF	1	0.490062	0.148223	0.464268	0.0601311	0.71905	0.203766	0.418144	0.177304
1052	BMPR1A_Y453_YF	BMPR1A	Y453		YF	GIVEEYQLPFF	1	0.43784	0.223483	0.629037	0.17684	0.798946	0.112605	0.430926	0.260435
1053	BMPR1A_Y457	BMPR1A	Y457			EYQLPYYNMVP	3	3.73716	1.59137	1.87295	0.758248	9.57889	4.73043	3.84175	0.78431
1054	BMPR1A_Y457_M460T	BMPR1A	Y457	M460T		EYQLPYYNTVP	3	6.88241	4.48477	0.872037	0.1737	9.47029	8.56909	5.59838	2.26376
1055	BMPR1A_Y457_M460T_YF	BMPR1A	Y457	M460T	YF	EFQLPYFNTVP	1	0.666589	0.131285	0.740989	0.16903	1.27235	0.27741	6.48201	1.36407
1056	BMPR1A_Y457_YF	BMPR1A	Y457		YF	EFQLPYFNMVP	1	0.750735	0.492809	0.950404	0.355696	2.81649	1.51067	6.21009	2.26367
1057	BMPR1A_Y458	BMPR1A	Y458			YQLPYYNMVPS	3	5.08457	3.31855	1.72787	0.568294	11.4419	9.70085	4.24697	1.72816
1058	BMPR1A_Y458_M460T	BMPR1A	Y458	M460T		YQLPYYNTVPS	3	8.81525	4.666	1.09857	0.514364	9.88065	8.71867	7.15842	1.6373
1059	BMPR1A_Y458_M460T_YF	BMPR1A	Y458	M460T	YF	FQLPFYNTVPS	1	5.80456	3.94403	0.815523	0.211509	0.911079	0.0723974	2.24475	1.92668
1060	BMPR1A_Y458_YF	BMPR1A	Y458		YF	FQLPFYNMVPS	1	1.97154	0.720134	0.652159	0.23672	0.951606	0.224735	2.54878	1.89083
1061	BMPR1A_Y467	BMPR1A	Y467			PSDPSYEDMRE	1	1.12302	0.24896	0.323517	0.333542	0.832037	0.367439	0.334158	0.181522
1062	BMPR1A_Y467_M470T	BMPR1A	Y467	M470T		PSDPSYEDTRE	1	1.73113	0.564649	1.52524	0.702776	1.76604	1.63747	1.12963	0.767981
1063	BMPR2_Y247	BMPR2	Y247			NEKNIYRVPLM	1	0.508107	0.0616755	0.755379	0.274303	0.864064	0.128361	0.71241	0.159209
1064	BMPR2_Y247_R248G	BMPR2	Y247	R248G		NEKNIYGVPLM	1	0.478364	0.240284	0.784965	0.322051	0.808288	0.194195	0.513337	0.154189
1065	BMPR2_Y979	BMPR2	Y979			RVKTPYSLKRW	1	2.05973	1.69978	3.37146	3.0414	1.94537	0.159046	1.66339	0.395161
1066	BMPR2_Y979_R974P	BMPR2	Y979	R974P		PVKTPYSLKRW	1	0.992063	0.479443	1.20112	0.35444	1.46154	0.30871	1.24038	0.379993
1067	BMS1_Y651	BMS1	Y651			KEEEDYKEENN	1	0.498824	0.201345	0.716268	0.334938	0.769221	0.131405	0.505077	0.152928
1068	BMS1_Y651_K652R	BMS1	Y651	K652R		KEEEDYREENN	1	0.457529	0.2575	0.822271	0.217779	0.753944	0.194798	0.541687	0.301998
1069	BMX_Y216	BMX	Y216			TSLAQYDSNSK	1	0.438442	0.186021	0.622498	0.180185	0.825982	0.209661	0.579483	0.262395
1070	BMX_Y216_S212R	BMX	Y216	S212R		TRLAQYDSNSK	1	0.637169	0.325629	0.82883	0.491802	0.962093	0.185734	0.564598	0.368724
1071	BOD1_Y82	BOD1	Y82			DTKPAYQNLRQ	1	0.864493	0.217165	0.666001	0.289918	11.758	11.7805	0.657373	0.192062
1072	BOD1_Y82_A81V	BOD1	Y82	A81V		DTKPVYQNLRQ	1	3.28852	0.435222	1.64841	0.777886	20.753	19.1796	1.10517	0.113319
1073	BPGM_Y92	BPGM	Y92			LNERHYGALIG	1	0.613072	0.195164	0.73993	0.270768	0.87139	0.0241076	0.872563	0.183066
1074	BPGM_Y92_R90C	BPGM	Y92	R90C		LNECHYGALIG	1	0.334157	0.0533703	0.446365	0.129749	0.680567	0.0836801	0.477792	0.191147
1075	BPIFB2_Y36	BPIFB2	Y36			KAALSYVSEIG	1	0.456953	0.177585	0.57986	0.352573	0.914283	0.0767426	0.487988	0.26442
1076	BPIFB2_Y36_K31M	BPIFB2	Y36	K31M		MAALSYVSEIG	1	0.477887	0.153484	0.85683	0.136772	0.819011	0.112949	0.544778	0.165858
1077	BRCA2_Y2621	BRCA2	Y2621			SRIWVYNHYRW	2	1.17088	0.584218	1.0981	0.247474	1.13837	0.285803	1.46134	0.328495
1078	BRCA2_Y2621_W2626C	BRCA2	Y2621	W2626C		SRIWVYNHYRC	2	0.695434	0.0903995	0.864424	0.177973	0.938064	0.105899	0.796471	0.233396
1079	BRCA2_Y2621_W2626C_YF	BRCA2	Y2621	W2626C	YF	SRIWVYNHFRC	1	0.558165	0.172096	0.58937	0.149955	0.8694	0.167307	0.605119	0.223306
1080	BRCA2_Y2621_YF	BRCA2	Y2621		YF	SRIWVYNHFRW	1	1.1164	0.410608	1.37219	0.281601	1.15276	0.420838	1.08704	0.482839
1081	BRCA2_Y2624	BRCA2	Y2624			WVYNHYRWIIW	2	0.509329	0.0534083	1.18053	0.547091	1.29524	0.565529	0.950558	0.130387
1082	BRCA2_Y2624_I2627F	BRCA2	Y2624	I2627F		WVYNHYRWFIW	2	0.665513	0.155306	0.733218	0.0424747	0.966238	0.189407	0.883448	0.204771
1083	BRCA2_Y2624_I2627F_YF	BRCA2	Y2624	I2627F	YF	WVFNHYRWFIW	1	0.586907	0.128742	0.692531	0.158374	0.941024	0.17273	0.733337	0.159794
1084	BRCA2_Y2624_W2626C	BRCA2	Y2624	W2626C		WVYNHYRCIIW	2	0.579889	0.16223	1.00355	0.472525	0.940374	0.253854	0.985493	0.219433
1085	BRCA2_Y2624_W2626C_YF	BRCA2	Y2624	W2626C	YF	WVFNHYRCIIW	1	0.588304	0.318804	0.754629	0.205541	0.820436	0.170653	0.684693	0.180387
1086	BRCA2_Y2624_YF	BRCA2	Y2624		YF	WVFNHYRWIIW	1	0.717373	0.322038	0.776162	0.181861	1.08616	0.19817	0.904776	0.278683
1087	BRCA2_Y3009	BRCA2	Y3009			KRYRIYHLATS	2	1.33608	0.476607	0.492763	0.114462	0.791007	0.22277	0.550127	0.240463
1088	BRCA2_Y3009_T3013I	BRCA2	Y3009	T3013I		KRYRIYHLAIS	2	1.51107	0.370539	1.03366	0.462671	1.1328	0.170122	0.829168	0.33576
1089	BRCA2_Y3009_T3013I_YF	BRCA2	Y3009	T3013I	YF	KRFRIYHLAIS	1	1.56363	0.861109	1.43124	0.332508	1.81383	0.230281	0.998728	0.395055
1090	BRCA2_Y3009_YF	BRCA2	Y3009		YF	KRFRIYHLATS	1	1.23643	0.288619	1.17956	0.512732	1.04999	0.25216	0.609998	0.325799
1091	BRCA2_Y57	BRCA2	Y57			HKNNNYEPNLF	1	0.413453	0.197892	0.501514	0.255242	0.636881	0.105498	0.517301	0.233569
1092	BRCA2_Y57_K53R	BRCA2	Y57	K53R		HRNNNYEPNLF	1	0.667526	0.0651582	0.651398	0.105826	0.673791	0.102645	0.665462	0.354151
1093	BRCA2_Y57_N60S	BRCA2	Y57	N60S		HKNNNYEPSLF	1	0.865982	0.297186	0.720249	0.152021	0.9315	0.16552	0.566835	0.063332
1094	BRCA2_Y71	BRCA2	Y71			QRKPSYNQLAS	1	1.05927	0.959771	1.1366	0.936024	1.59286	1.05891	1.00402	0.361095
1095	BRCA2_Y71_A75P	BRCA2	Y71	A75P		QRKPSYNQLPS	1	0.423187	0.157219	0.647925	0.0776418	0.858324	0.178391	0.598254	0.245807
1096	BRD1_Y33	BRD1	Y33			RETLTYAQAQR	1	0.752646	0.0969661	0.819408	0.105577	0.904099	0.0990708	0.984408	0.34106
1097	BRD1_Y33_R38G	BRD1	Y33	R38G		RETLTYAQAQG	1	#DIV/0!	#DIV/0!	#DIV/0!	#DIV/0!	#DIV/0!	#DIV/0!	#DIV/0!	#DIV/0!
1098	BRD2_Y715	BRD2	Y715			KPRKPYTIKKP	1	1.89548	1.44556	1.73129	0.200618	1.85266	0.181175	1.54054	0.474564
1099	BRD2_Y715_P714L	BRD2	Y715	P714L		KPRKLYTIKKP	1	0.971914	0.291609	1.19089	0.681878	1.07279	0.150306	0.474568	0.223587
1100	BRD4_Y599	BRD4	Y599			KPPPTYESEEE	1	0.728398	0.214301	0.718736	0.141485	0.976721	0.281716	0.721163	0.331946
1101	BRD4_Y599_T598S	BRD4	Y599	T598S		KPPPSYESEEE	1	0.761528	0.300558	0.517382	0.346629	1.04226	0.027214	0.661035	0.352881
1102	BRDT_Y291	BRDT	Y291			KKHFSYAWPFY	2	1.52268	0.933927	1.46255	0.511987	1.72933	0.473204	1.5109	0.188687
1103	BRDT_Y291_H288Y	BRDT	Y291	H288Y		KKYFSYAWPFY	3	1.43186	0.336442	1.66301	0.535959	1.9306	0.896635	2.18237	0.150337
1104	BRDT_Y291_H288Y_YF	BRDT	Y291	H288Y	YF	KKFFSYAWPFF	1	0.982077	0.361321	1.25203	0.347314	1.33878	0.124407	1.05034	0.227867
1105	BRDT_Y291_YF	BRDT	Y291		YF	KKHFSYAWPFF	1	1.77116	1.3282	2.15273	0.889762	1.80274	0.277591	1.50807	0.419423
1106	BRDT_Y331	BRDT	Y331			MDNQEYKDAYK	2	0.498956	0.197281	1.05083	0.448294	0.814324	0.133162	0.601751	0.245796
1107	BRDT_Y331_K336T	BRDT	Y331	K336T		MDNQEYKDAYT	2	0.574292	0.209678	0.654598	0.104224	0.702289	0.231282	1.26246	0.238899
1108	BRDT_Y331_K336T_YF	BRDT	Y331	K336T	YF	MDNQEYKDAFT	1	0.616618	0.309466	0.68957	0.393805	0.684839	0.115561	0.589359	0.190196
1109	BRDT_Y331_YF	BRDT	Y331		YF	MDNQEYKDAFK	1	0.532326	0.345864	0.721172	0.192934	1.0668	0.483846	0.551795	0.337022
1110	BRDT_Y335	BRDT	Y335			EYKDAYKFAAD	2	0.863765	0.523476	0.571764	0.366335	0.861125	0.0256993	1.09021	0.0650908
1111	BRDT_Y335_K336T	BRDT	Y335	K336T		EYKDAYTFAAD	2	0.610483	0.220967	0.726978	0.388251	0.87565	0.14289	1.44205	0.266945
1112	BRDT_Y335_K336T_YF	BRDT	Y335	K336T	YF	EFKDAYTFAAD	1	0.70266	0.127751	0.712572	0.293085	0.813383	0.062238	1.33255	0.152123
1113	BRDT_Y335_YF	BRDT	Y335		YF	EFKDAYKFAAD	1	0.459417	0.0932743	0.778794	0.217115	0.700234	0.243762	0.519089	0.145213
1114	BRIP1_Y916	BRIP1	Y916			VTSLKYSTSPY	2	0.430174	0.125534	0.419763	0.121329	0.754072	0.248755	0.532235	0.325267
1115	BRIP1_Y916_S919P	BRIP1	Y916	S919P		VTSLKYSTPPY	2	0.434454	0.227078	1.31351	0.862005	0.954656	0.15631	0.906629	0.2381
1116	BRIP1_Y916_S919P_YF	BRIP1	Y916	S919P	YF	VTSLKYSTPPF	1	0.492314	0.09839	0.560182	0.174384	0.92908	0.166596	0.789127	0.221735
1117	BRIP1_Y916_YF	BRIP1	Y916		YF	VTSLKYSTSPF	1	0.454998	0.248582	0.66446	0.505089	1.09145	0.500276	0.647592	0.274251
1118	BRIP1_Y921	BRIP1	Y921			YSTSPYLLEAA	2	0.628612	0.185952	1.14549	0.809553	0.656523	0.20561	6.34529	2.30748
1119	BRIP1_Y921_S919P	BRIP1	Y921	S919P		YSTPPYLLEAA	2	1.08133	0.248587	0.811202	0.308793	0.862096	0.144811	6.64574	2.44356
1120	BRIP1_Y921_S919P_YF	BRIP1	Y921	S919P	YF	FSTPPYLLEAA	1	0.606672	0.260114	0.655355	0.48403	0.952319	0.266729	3.52161	1.15287
1121	BRIP1_Y921_YF	BRIP1	Y921		YF	FSTSPYLLEAA	1	0.577213	0.257547	1.16732	0.281064	0.954007	0.124477	1.81234	0.68132
1122	BSCL2_Y213	BSCL2	Y213			QLYGAYLRIHA	2	1.12934	0.140466	1.35294	0.356226	1.2678	0.261144	1.0418	0.153628
1123	BSCL2_Y213_A212P	BSCL2	Y213	A212P		QLYGPYLRIHA	2	1.07029	0.459038	1.5398	0.367601	1.29396	0.427746	2.05994	0.144008
1124	BSCL2_Y213_A212P_YF	BSCL2	Y213	A212P	YF	QLFGPYLRIHA	1	1.17005	0.195723	1.54266	0.453129	1.3351	0.411487	1.7608	0.184861
1125	BSCL2_Y213_YF	BSCL2	Y213		YF	QLFGAYLRIHA	1	0.971853	0.530693	0.952447	0.562531	1.27644	0.1708	0.834947	0.220072
1126	BST2_Y6	BST2	Y6			MASTSYDYCRV	2	1.78945	0.0788067	0.671225	0.0969948	0.90368	0.131057	1.12449	0.16673
1127	BST2_Y6_T4I	BST2	Y6	T4I		MASISYDYCRV	2	1.22324	0.434176	0.770383	0.0939441	1.10278	0.116251	1.08727	0.0441267
1128	BST2_Y6_T4I_YF	BST2	Y6	T4I	YF	MASISYDFCRV	1	0.671883	0.1321	0.666271	0.033375	0.763882	0.265347	0.802895	0.0877965
1129	BST2_Y6_YF	BST2	Y6		YF	MASTSYDFCRV	1	1.66217	0.714401	0.72667	0.186483	0.990222	0.0925682	1.39438	0.451242
1130	BST2_Y8	BST2	Y8			STSYDYCRVPM	2	1.53647	0.341637	0.937484	0.434982	0.857882	0.149939	1.23985	0.129875
1131	BST2_Y8_T4I	BST2	Y8	T4I		SISYDYCRVPM	2	0.83119	0.0890997	0.70466	0.293397	1.01279	0.307776	0.840922	0.110936
1132	BST2_Y8_T4I_YF	BST2	Y8	T4I	YF	SISFDYCRVPM	1	0.390421	0.153753	0.64961	0.093873	0.725542	0.203995	0.443923	0.174605
1133	BST2_Y8_YF	BST2	Y8		YF	STSFDYCRVPM	1	0.558301	0.0521401	0.570695	0.14665	0.674799	0.160792	0.531681	0.25097
1134	BTD_Y536	BTD	Y536			VTAALYGRLYE	2	1.12375	0.498751	0.837551	0.218157	0.898874	0.187816	2.73062	0.718758
1135	BTD_Y536_R538C	BTD	Y536	R538C		VTAALYGCLYE	2	0.546935	0.121304	0.563527	0.153358	0.728571	0.212013	0.690683	0.218051
1136	BTD_Y536_R538C_YF	BTD	Y536	R538C	YF	VTAALYGCLFE	1	0.520285	0.167104	0.606442	0.0243791	0.849986	0.156481	0.590103	0.19205
1137	BTD_Y536_T532M	BTD	Y536	T532M		VMAALYGRLYE	2	1.52366	0.886971	1.52744	0.428182	1.30517	0.255046	2.21696	0.0978583
1138	BTD_Y536_T532M_YF	BTD	Y536	T532M	YF	VMAALYGRLFE	1	1.17495	0.534957	1.44235	0.210645	1.59458	0.141969	1.39167	0.608021
1139	BTD_Y536_YF	BTD	Y536		YF	VTAALYGRLFE	1	0.626853	0.137176	1.15771	0.366756	1.16108	0.358117	0.594966	0.256295
1140	BTK_Y334	BTK	Y334			GVIRHYVVCST	1	0.495225	0.0294825	0.529097	0.194169	0.819325	0.0624416	0.595956	0.163243
1141	BTK_Y334_Y334S	BTK	Y334	Y334S		GVIRHSVVCST	0	0.585575	0.184494	0.637454	0.224151	0.996219	0.347269	0.528957	0.253723
1142	BTK_Y361	BTK	Y361			PELINYHQHNS	1	0.466142	0.156538	0.766963	0.486115	0.999815	0.0821646	0.826499	0.130573
1143	BTK_Y361_H362Q	BTK	Y361	H362Q		PELINYQQHNS	1	0.491493	0.158109	0.731835	0.213603	0.753247	0.213037	0.457529	0.19407
1144	BTK_Y361_H364P	BTK	Y361	H364P		PELINYHQPNS	1	0.70439	0.387783	0.763113	0.573574	1.06955	0.428791	0.760006	0.388106
1145	BTK_Y361_L358F	BTK	Y361	L358F		PEFINYHQHNS	1	0.608444	0.197799	0.658674	0.328085	0.658512	0.180841	0.424436	0.15825
1146	BTK_Y361_N365Y	BTK	Y361	N365Y		PELINYHQHYS	2	0.657933	0.211826	1.07066	0.155185	1.07716	0.237877	2.78385	0.680934
1147	BTK_Y361_N365Y_YF	BTK	Y361	N365Y	YF	PELINYHQHFS	1	0.556867	0.235958	0.93419	0.0801546	0.894505	0.196744	1.27065	0.184975
1148	BTK_Y361_S366F	BTK	Y361	S366F		PELINYHQHNF	1	0.433617	0.194238	0.715854	0.233218	1.03005	0.0671642	0.789736	0.310505
1149	BTK_Y361_Y361C	BTK	Y361	Y361C		PELINCHQHNS	0	0.64119	0.373514	0.918654	0.212664	1.00898	0.453504	0.581042	0.36661
1150	BTK_Y375	BTK	Y375			ISRLKYPVSQQ	1	0.831449	0.485473	1.0367	0.288179	0.938007	0.178071	0.598838	0.250487
1151	BTK_Y375_I370M	BTK	Y375	I370M		MSRLKYPVSQQ	1	0.608054	0.02114	0.779516	0.163977	1.03486	0.0969741	0.368171	0.156338
1152	BTK_Y375_R372G	BTK	Y375	R372G		ISGLKYPVSQQ	1	0.41715	0.154116	0.630425	0.248742	0.879461	0.0962615	0.295755	0.210514
1153	BTK_Y40	BTK	Y40			HKLSYYEYDFE	3	3.40044	0.318353	0.94127	0.339051	1.05245	0.253116	3.85863	2.0869
1154	BTK_Y40_Y39S	BTK	Y40	Y39S		HKLSSYEYDFE	2	1.32749	0.64042	0.410842	0.118963	0.689694	0.232372	0.380256	0.152451
1155	BTK_Y40_Y39S_YF	BTK	Y40	Y39S	YF	HKLSSYEFDFE	1	3.00431	1.53653	0.718861	0.161863	0.973701	0.0836509	0.586779	0.328737
1156	BTK_Y40_Y40C	BTK	Y40	Y40C		HKLSYCEYDFE	2	0.914298	0.106128	0.680209	0.523853	1.29628	0.539809	1.04718	0.325443
1157	BTK_Y40_Y40C_YF	BTK	Y40	Y40C	YF	HKLSFCEFDFE	0	0.622193	0.227261	0.937194	0.324842	1.10897	0.100107	0.611159	0.32121
1158	BTK_Y40_Y40N	BTK	Y40	Y40N		HKLSYNEYDFE	2	0.790129	0.164844	0.411539	0.398853	1.14306	0.626355	2.36317	1.14249
1159	BTK_Y40_Y40N_YF	BTK	Y40	Y40N	YF	HKLSFNEFDFE	0	0.470767	0.127929	0.456215	0.286773	0.789299	0.35635	0.430162	0.267453
1160	BTK_Y40_YF	BTK	Y40		YF	HKLSFYEFDFE	1	3.27051	0.196962	0.846091	0.0757331	0.910626	0.0994123	0.695007	0.16687
1161	BTK_Y425	BTK	Y425			KWRGQYDVAIK	1	1.21253	0.357577	0.934917	0.245226	1.3377	0.348896	0.959479	0.408097
1162	BTK_Y425_I429N	BTK	Y425	I429N		KWRGQYDVANK	1	1.19625	0.475469	0.957255	0.252424	1.07955	0.282953	0.844062	0.143201
1163	BTK_Y425_K430E	BTK	Y425	K430E		KWRGQYDVAIE	1	3.07403	1.32087	0.822854	0.271482	1.01546	0.162203	1.04028	0.198592
1164	BTK_Y425_K430R	BTK	Y425	K430R		KWRGQYDVAIR	1	1.73534	0.803215	1.57183	0.651118	1.35343	0.210519	1.23655	0.306993
1165	BTK_Y461	BTK	Y461			KLVQLYGVCTK	1	0.881931	0.128485	0.98117	0.25053	1.06766	0.0425933	0.754391	0.214842
1166	BTK_Y461_G462D	BTK	Y461	G462D		KLVQLYDVCTK	1	0.881104	0.12543	0.864746	0.260984	0.984305	0.146399	0.617248	0.318091
1167	BTK_Y461_G462V	BTK	Y461	G462V		KLVQLYVVCTK	1	0.48185	0.0567277	1.00722	0.320892	0.880816	0.254727	0.625615	0.304543
1168	BTK_Y511	BTK	Y511			CEAMEYLESKQ	1	0.402009	0.017148	0.553193	0.274852	0.675844	0.108939	0.501377	0.156501
1169	BTK_Y511_A508D	BTK	Y511	A508D		CEDMEYLESKQ	1	0.454015	0.0872737	0.62219	0.185628	0.804531	0.172964	0.478714	0.281566
1170	BTK_Y511_A508T	BTK	Y511	A508T		CETMEYLESKQ	1	0.427086	0.0431851	0.555358	0.168177	0.630356	0.0951937	0.518104	0.175202
1171	BTK_Y511_C506R	BTK	Y511	C506R		REAMEYLESKQ	1	0.491394	0.0855663	0.678036	0.189892	0.705775	0.211723	0.362054	0.196112
1172	BTK_Y511_C506Y	BTK	Y511	C506Y		YEAMEYLESKQ	2	9.99995	2.30509	0.648888	0.0306336	0.645864	0.0890231	1.35084	0.324054
1173	BTK_Y511_C506Y_YF	BTK	Y511	C506Y	YF	FEAMEYLESKQ	1	0.484238	0.123722	0.635378	0.357997	0.6408	0.129691	0.412656	0.249422
1174	BTK_Y511_L512P	BTK	Y511	L512P		CEAMEYPESKQ	1	0.659512	0.182009	0.727996	0.200071	0.975817	0.545068	0.506449	0.23393
1175	BTK_Y511_L512Q	BTK	Y511	L512Q		CEAMEYQESKQ	1	0.437485	0.0948962	0.557188	0.350598	0.843291	0.100291	0.525485	0.236661
1176	BTK_Y511_M509I	BTK	Y511	M509I		CEAIEYLESKQ	1	0.639672	0.0490832	0.738358	0.0255616	0.773659	0.158119	0.510382	0.249668
1177	BTK_Y511_M509V	BTK	Y511	M509V		CEAVEYLESKQ	1	0.538819	0.065957	0.643004	0.134139	0.928509	0.149151	0.546296	0.254768
1178	BTK_Y617	BTK	Y617			QGLRLYRPHLA	1	0.988435	0.407139	1.0422	0.383205	1.40319	0.18347	1.09243	0.336706
1179	BTK_Y617_A622P	BTK	Y617	A622P		QGLRLYRPHLP	1	0.780744	0.0762686	1.33988	0.193758	0.816019	0.161361	0.909113	0.221185
1180	BTK_Y617_G613D	BTK	Y617	G613D		QDLRLYRPHLA	1	0.581177	0.229205	0.554894	0.298138	0.728104	0.125629	1.74337	0.73063
1181	BTK_Y617_P619A	BTK	Y617	P619A		QGLRLYRAHLA	1	1.2142	0.868173	1.61116	0.439602	1.37781	0.115684	1.45211	0.477764
1182	BTK_Y617_P619S	BTK	Y617	P619S		QGLRLYRSHLA	1	1.03128	0.720556	0.887539	0.253211	1.20698	0.190489	0.820584	0.308801
1183	BTK_Y617_P619T	BTK	Y617	P619T		QGLRLYRTHLA	1	1.08216	0.65517	1.31414	0.28207	1.34287	0.458136	1.05322	0.165086
1184	BTNL2_Y91	BTNL2	Y91			MQMEEYRGWVE	1	0.391132	0.0584257	0.391815	0.132305	0.945878	0.320855	0.722643	0.102445
1185	BTNL2_Y91_W94R	BTNL2	Y91	W94R		MQMEEYRGRVE	1	0.407906	0.205169	0.871451	0.0963287	0.78514	0.220534	0.453124	0.17065
1186	BUB1_Y538	BUB1	Y538			GNKENYGLPQP	1	0.374949	0.129597	0.676647	0.280209	0.575486	0.0877972	0.595688	0.261907
1187	BUB1_Y538_N534D	BUB1	Y538	N534D		GDKENYGLPQP	1	0.517955	0.25769	0.741941	0.381878	0.866384	0.126364	0.479856	0.319773
1188	C1orf162_Y120	C1orf162	Y120			GESLTYASTTF	1	0.649145	0.342182	0.679482	0.317553	0.752087	0.0914306	0.564593	0.24941
1189	C1orf162_Y120_A121V	C1orf162	Y120	A121V		GESLTYVSTTF	1	0.518667	0.276545	0.711721	0.0237504	0.843083	0.310427	0.524646	0.336451
1190	C1QBP_Y188	C1QBP	Y188			VLDCHYPEDEV	1	0.467746	0.220611	0.929266	0.139664	1.01426	0.0779754	0.522277	0.367638
1191	C1QBP_Y188_C186S	C1QBP	Y188	C186S		VLDSHYPEDEV	1	0.573349	0.224977	0.697002	0.180939	1.0587	0.400101	0.475394	0.307431
1192	C1QTNF1_Y145	C1QTNF1	Y145			RCKSHYAAFSV	1	1.34286	0.70289	1.73223	0.701102	1.44758	0.0964723	1.01139	0.256413
1193	C1QTNF1_Y145_S143N	C1QTNF1	Y145	S143N		RCKNHYAAFSV	1	1.66538	0.928289	1.70214	0.446357	1.9745	0.400989	1.40074	0.669362
1194	C3orf33_Y164	C3orf33	Y164			VSKGGYFSVNL	1	2.06045	0.291161	1.0716	0.303225	0.871879	0.334779	4.48943	1.77796
1195	C3orf33_Y164_S160N	C3orf33	Y164	S160N		VNKGGYFSVNL	1	1.40438	0.095574	0.725352	0.145396	0.647795	0.0225963	3.87123	2.07496
1196	C4BPA_Y470	C4BPA	Y470			KLSCSYSHWSA	1	0.731885	0.177165	0.802254	0.333202	0.894236	0.29607	1.23362	0.144058
1197	C4BPA_Y470_W473L	C4BPA	Y470	W473L		KLSCSYSHLSA	1	0.631317	0.0978495	0.734372	0.146355	0.896936	0.55239	0.66593	0.0923313
1198	C5orf42_Y1451	C5orf42	Y1451			PGVDRYSLGTS	1	0.261555	0.0958637	0.761524	0.473126	0.576145	0.133804	0.334004	0.0623061
1199	C5orf42_Y1451_P1446A	C5orf42	Y1451	P1446A		AGVDRYSLGTS	1	0.450423	0.117222	0.614844	0.188918	0.790258	0.122563	0.512006	0.247899
1200	C5orf64_Y60	C5orf64	Y60			LTAEVYFPSIK	1	0.453227	0.0309248	0.707867	0.232443	0.762836	0.105679	0.735523	0.181027
1201	C5orf64_Y60_A57T	C5orf64	Y60	A57T		LTTEVYFPSIK	1	0.563555	0.3751	0.885323	0.573834	0.910905	0.534174	0.774844	0.476938
1202	C7orf57_Y70	C7orf57	Y70			ETDSEYVKLAK	1	0.479226	0.274128	0.67588	0.204757	0.816259	0.104556	0.429906	0.314796
1203	C7orf57_Y70_A74S	C7orf57	Y70	A74S		ETDSEYVKLSK	1	0.753192	0.301177	0.588281	0.153816	1.09794	0.269463	0.530692	0.42893
1204	C9orf24_Y126	C9orf24	Y126			NKYTTYLPRLP	2	0.991054	0.342809	0.775901	0.283593	0.904996	0.147769	1.85724	0.248952
1205	C9orf24_Y126_R129W	C9orf24	Y126	R129W		NKYTTYLPWLP	2	0.738983	0.240157	1.00639	0.0473495	1.1365	0.0774119	1.99234	0.542789
1206	C9orf24_Y126_R129W_YF	C9orf24	Y126	R129W	YF	NKFTTYLPWLP	1	0.815249	0.230915	0.889941	0.0805442	1.19392	0.240798	1.40507	0.207071
1207	C9orf24_Y126_YF	C9orf24	Y126		YF	NKFTTYLPRLP	1	0.824388	0.107187	1.01846	0.48916	0.926716	0.171572	0.97975	0.192521
1208	CABP5_Y62	CABP5	Y62			MRTMGYMPTEM	1	0.407279	0.0893241	1.08027	0.285474	0.788884	0.293617	0.426749	0.22577
1209	CABP5_Y62_T65R	CABP5	Y62	T65R		MRTMGYMPREM	1	0.480299	0.151533	0.575856	0.20635	0.785309	0.170668	0.442041	0.216474
1210	CACNA1A_Y1013	CACNA1A	Y1013			GAPATYEGDAR	1	0.649439	0.169633	0.668587	0.215831	0.892604	0.180403	0.742171	0.153764
1211	CACNA1A_Y1013_E1014K	CACNA1A	Y1013	E1014K		GAPATYKGDAR	1	0.482793	0.211026	1.17362	0.507344	1.08565	0.18757	0.511763	0.351486
1212	CACNA1A_Y794	CACNA1A	Y794			SREALYNEMDP	1	1.28266	0.270764	0.489069	0.0282238	0.913212	0.176556	0.530765	0.111301
1213	CACNA1A_Y794_M797T	CACNA1A	Y794	M797T		SREALYNETDP	1	0.764488	0.17147	0.641074	0.074294	0.889546	0.409673	1.36339	0.61909
1214	CACNA1C_Y1757	CACNA1C	Y1757			GNHVSYYQSDG	2	0.902468	0.215378	0.801704	0.086196	0.806427	0.412186	4.08207	1.39639
1215	CACNA1C_Y1757_V1755I	CACNA1C	Y1757	V1755I		GNHISYYQSDG	2	2.32367	0.263886	0.751397	0.547575	0.885382	0.40419	4.601	1.35043
1216	CACNA1C_Y1757_V1755I_YF	CACNA1C	Y1757	V1755I	YF	GNHISYFQSDG	1	0.40142	0.0994542	0.805916	0.195683	0.926521	0.156195	0.890264	0.104891
1217	CACNA1C_Y1757_YF	CACNA1C	Y1757		YF	GNHVSYFQSDG	1	0.618146	0.236525	0.70587	0.163002	0.839848	0.127145	1.66142	0.56267
1218	CACNA1C_Y1832	CACNA1C	Y1832			PRPAGYPSTVS	1	0.48399	0.085224	0.621443	0.0802094	1.00233	0.0931002	0.456004	0.300513
1219	CACNA1C_Y1832_G1831C	CACNA1C	Y1832	G1831C		PRPACYPSTVS	1	0.650071	0.119285	0.800186	0.268684	0.864632	0.155542	0.643985	0.250438
1220	CACNA1C_Y1832_T1835M	CACNA1C	Y1832	T1835M		PRPAGYPSMVS	1	0.311714	0.0937668	0.507337	0.216402	0.755288	0.414807	0.369169	0.292258
1221	CACNA1H_Y519	CACNA1H	Y519			VHHLVYHHHHH	1	1.15419	0.773873	1.36179	0.517492	1.28465	0.299958	1.17019	0.195514
1222	CACNA1H_Y519_H516Y	CACNA1H	Y519	H516Y		VHYLVYHHHHH	2	1.00006	0.608481	1.44673	0.700429	0.984903	0.127095	0.955124	0.152495
1223	CACNA1H_Y519_H516Y_YF	CACNA1H	Y519	H516Y	YF	VHFLVYHHHHH	1	0.791464	0.447444	0.755364	0.313481	1.21353	0.142638	1.09206	0.235056
1224	CACNB4_Y103	CACNB4	Y103			KTNVSYCGALD	1	0.55073	0.0654658	0.726399	0.190883	0.899652	0.24106	0.791276	0.042539
1225	CACNB4_Y103_C104F	CACNB4	Y103	C104F		KTNVSYFGALD	1	0.442711	0.203105	0.629631	0.190446	0.847059	0.217483	1.3326	0.258151
1226	CAD_Y735	CAD	Y735			EPSVDYCVVKI	1	0.684256	0.420427	1.21485	0.587385	1.11432	0.574119	0.662829	0.45815
1227	CAD_Y735_Y735C	CAD	Y735	Y735C		EPSVDCCVVKI	0	0.493584	0.282384	1.00275	0.38547	0.886686	0.336551	0.566259	0.378059
1228	CAGE1_Y438	CAGE1	Y438			KSVSQYLEMDK	1	1.90407	0.748751	0.527666	0.0710041	0.873072	0.392238	0.695291	0.0129573
1229	CAGE1_Y438_V435L	CAGE1	Y438	V435L		KSLSQYLEMDK	1	1.39816	0.159254	0.837397	0.305959	0.709102	0.0944572	0.727047	0.197925
1230	CALCOCO2_Y358	CALCOCO2	Y358			FNSLPYQVPTS	1	0.842851	0.316844	0.871176	0.466939	1.11591	0.333901	4.41317	0.934843
1231	CALCOCO2_Y358_P357L	CALCOCO2	Y358	P357L		FNSLLYQVPTS	1	0.53799	0.193534	0.91018	0.322353	0.817833	0.140195	0.640722	0.257604
1232	CALM1_Y100	CALM1	Y100			KDGNGYISAAE	1	0.570719	0.204151	0.746395	0.108725	0.742038	0.140297	0.50458	0.28199
1233	CALM1_Y100_N98S	CALM1	Y100	N98S		KDGSGYISAAE	1	0.465315	0.0893968	0.815504	0.280059	0.715031	0.166445	0.480238	0.267442
1234	CALM1_Y139	CALM1	Y139			DGQVNYEEFVQ	1	0.399089	0.146665	0.493287	0.188651	0.7837	0.0900334	0.408001	0.246994
1235	CALM1_Y139_E141G	CALM1	Y139	E141G		DGQVNYEGFVQ	1	0.585737	0.106028	0.466919	0.292686	0.659332	0.0927114	0.733331	0.219575
1236	CALM1_Y139_F142L	CALM1	Y139	F142L		DGQVNYEELVQ	1	0.744622	0.328734	0.733023	0.0561755	0.835203	0.252632	0.475058	0.341512
1237	CALM2_Y100_D96V	CALM2	Y100	D96V		KVGNGYISAAE	1	0.53012	0.093815	0.545583	0.0926893	0.891525	0.227879	0.540102	0.235482
1238	CALM2_Y100_N98I	CALM2	Y100	N98I		KDGIGYISAAE	1	0.598075	0.13232	0.68585	0.27157	1.06616	0.263296	0.386168	0.229432
1239	CALM2_Y139_D134H	CALM2	Y139	D134H		HGQVNYEEFVQ	1	0.828251	0.280709	0.650539	0.476674	0.693979	0.18235	0.540702	0.228173
1240	CALM2_Y139_Q136P	CALM2	Y139	Q136P		DGPVNYEEFVQ	1	0.417881	0.178076	0.655651	0.248322	0.847947	0.234368	0.408987	0.265948
1241	CALM3_Y100_A103V	CALM3	Y100	A103V		KDGNGYISVAE	1	2.49995	0.522616	0.74586	0.299006	0.685298	0.0852029	0.762707	0.28707
1242	CAMK2A_Y106	CAMK2A	Y106			IVAREYYSEAD	2	3.19625	0.967712	0.644908	0.117912	0.886046	0.194741	1.56216	0.362936
1243	CAMK2A_Y106_E109D	CAMK2A	Y106	E109D		IVAREYYSDAD	2	3.10422	0.978493	0.833041	0.119306	0.868684	0.128616	1.61075	0.351589
1244	CAMK2A_Y106_E109D_YF	CAMK2A	Y106	E109D	YF	IVAREYFSDAD	1	0.466635	0.168189	0.588567	0.112926	0.799587	0.101651	1.34271	0.106695
1245	CAMK2A_Y106_YF	CAMK2A	Y106		YF	IVAREYFSEAD	1	0.566214	0.145951	0.867329	0.138949	0.899595	0.249898	1.09571	0.141708
1246	CAMK2A_Y230	CAMK2A	Y230			IKAGAYDFPSP	1	4.15477	0.937044	0.686845	0.242865	1.02679	0.0687264	2.13677	0.368391
1247	CAMK2A_Y230_P235L	CAMK2A	Y230	P235L		IKAGAYDFPSL	1	4.75749	0.728426	0.625887	0.158442	0.77434	0.173376	1.73736	0.231824
1248	CAMK2B_Y107_E110K	CAMK2B	Y107	E110K		IVAREYYSKAD	2	2.01445	0.565829	0.748878	0.0873487	0.750258	0.207884	1.99699	0.368193
1249	CAMK2B_Y107_E110K_YF	CAMK2B	Y107	E110K	YF	IVAREYFSKAD	1	0.472662	0.182057	0.604265	0.182248	0.786801	0.165079	1.51793	0.343071
1250	CAMKK2_Y128	CAMKK2	Y128			CPSLPYSPVSS	1	0.711857	0.0386749	0.854849	0.315591	0.977966	0.101422	1.46933	0.161752
1251	CAMKK2_Y128_C123Y	CAMKK2	Y128	C123Y		YPSLPYSPVSS	2	0.667954	0.0810568	1.01192	0.241135	0.966764	0.0603485	3.13675	0.516773
1252	CAMKK2_Y128_C123Y_YF	CAMKK2	Y128	C123Y	YF	FPSLPYSPVSS	1	0.671872	0.0900132	0.863201	0.131999	0.857451	0.149041	1.70173	0.230691
1253	CAMKK2_Y128_P127L	CAMKK2	Y128	P127L		CPSLLYSPVSS	1	1.06772	0.711575	0.682432	0.106611	0.783716	0.0704118	1.24978	0.768349
1254	CAMKK2_Y183	CAMKK2	Y183			VVKLAYNENDN	1	0.408335	0.182462	0.622486	0.366465	0.904104	0.330898	0.45199	0.206067
1255	CAMKK2_Y183_A182T	CAMKK2	Y183	A182T		VVKLTYNENDN	1	0.468622	0.0640652	0.672782	0.171834	0.81517	0.157082	0.442058	0.251716
1256	CAMKV_Y491	CAMKV	Y491			EEAAGYAQESQ	1	0.577122	0.343747	0.717588	0.319539	1.05243	0.215685	0.510315	0.303608
1257	CAMKV_Y491_Y491C	CAMKV	Y491	Y491C		EEAAGCAQESQ	0	0.790254	0.34277	0.836589	0.25689	0.973766	0.184616	0.562071	0.34912
1258	CAMKV_Y95	CAMKV	Y95			VTRKEYFIFLE	1	1.03074	0.35418	1.42991	0.369714	1.55319	0.209416	1.43616	0.468401
1259	CAMKV_Y95_R92H	CAMKV	Y95	R92H		VTHKEYFIFLE	1	1.318	0.567079	1.98141	0.689903	1.7777	0.291236	1.3929	0.479763
1260	CAP2_Y316	CAP2	Y316			TSPKSYPSQKH	1	0.538022	0.0864234	0.432627	0.178481	0.822986	0.139115	0.339688	0.208408
1261	CAP2_Y316_T311A	CAP2	Y316	T311A		ASPKSYPSQKH	1	0.385492	0.169533	0.638425	0.200367	0.635485	0.130385	0.399874	0.230089
1262	CAP2_Y316_Y316C	CAP2	Y316	Y316C		TSPKSCPSQKH	0	0.759434	0.244123	0.966916	0.451352	0.971032	0.393096	0.641326	0.374195
1263	CAPN1_Y494	CAPN1	Y494			LPPGEYVVVPS	1	0.788782	0.266429	0.795168	0.0648934	1.05659	0.233439	0.439059	0.288586
1264	CAPN1_Y494_G492R	CAPN1	Y494	G492R		LPPREYVVVPS	1	1.17443	0.260632	1.03223	0.448261	0.917561	0.25866	0.551774	0.254346
1265	CARD11_Y970	CARD11	Y970			LVRAFYCERRR	1	0.24262	0.161828	0.449493	0.170816	0.383332	0.149054	0.148712	0.107966
1266	CARD11_Y970_R975W	CARD11	Y970	R975W		LVRAFYCERRW	1	0.49022	0.140984	0.68091	0.382469	0.952924	0.337879	0.381259	0.232414
1267	CARD9_Y76	CARD9	Y76			TGHKGYVAFLE	1	1.93408	0.230668	0.810366	0.029726	0.739475	0.0849086	0.612342	0.152961
1268	CARD9_Y76_G72S	CARD9	Y76	G72S		TSHKGYVAFLE	1	2.64005	0.248107	0.724132	0.195904	0.877395	0.127198	0.600478	0.0943595
1269	CARMIL1_Y637	CARMIL1	Y637			MPIPMYDASQA	1	0.537353	0.0555335	0.749692	0.204887	0.886803	0.0960763	2.15204	0.487979
1270	CARMIL1_Y637_A639G	CARMIL1	Y637	A639G		MPIPMYDGSQA	1	0.451986	0.060406	0.529946	0.3437	0.746071	0.136409	1.47647	0.221044
1271	CASD1_Y382	CASD1	Y382			IMAYFYMCDRA	2	0.869629	0.0852474	1.021	0.490536	1.14068	0.403137	0.808694	0.154025
1272	CASD1_Y382_R386S	CASD1	Y382	R386S		IMAYFYMCDSA	2	0.677442	0.173744	0.702272	0.174064	1.07619	0.254386	0.879648	0.0366994
1273	CASD1_Y382_R386S_YF	CASD1	Y382	R386S	YF	IMAFFYMCDSA	1	0.550855	0.298884	0.724843	0.0869097	1.10202	0.137543	0.863016	0.0798283
1274	CASD1_Y382_YF	CASD1	Y382		YF	IMAFFYMCDRA	1	0.641338	0.226018	0.824696	0.263904	0.819466	0.151166	0.799071	0.126381
1275	CASK_Y708	CASK	Y708			KKKKQYKDKYL	2	0.275199	0.119242	0.244372	0.0485713	0.871941	0.276351	0.229219	0.103979
1276	CASK_Y708_D710G	CASK	Y708	D710G		KKKKQYKGKYL	2	0.436093	0.0606693	0.302341	0.187584	0.669264	0.361312	0.204136	0.077451
1277	CASK_Y708_D710G_YF	CASK	Y708	D710G	YF	KKKKQYKGKFL	1	0.515103	0.409652	0.915579	0.0583563	0.684868	0.364106	0.277006	0.192524
1278	CASK_Y708_YF	CASK	Y708		YF	KKKKQYKDKFL	1	0.453123	0.0324907	0.408206	0.126872	0.683338	0.0944475	0.249324	0.108011
1279	CASK_Y712	CASK	Y712			QYKDKYLAKHN	2	1.02074	0.728085	0.798104	0.469157	0.647872	0.0584439	0.751791	0.295381
1280	CASK_Y712_D710G	CASK	Y712	D710G		QYKGKYLAKHN	2	1.05616	0.626352	0.791787	0.245068	1.41922	0.485268	0.765154	0.0978259
1281	CASK_Y712_D710G_YF	CASK	Y712	D710G	YF	QFKGKYLAKHN	1	1.1619	0.566054	1.16318	0.601232	1.29474	0.344404	0.731229	0.0912096
1282	CASK_Y712_YF	CASK	Y712		YF	QFKDKYLAKHN	1	0.913747	0.556765	1.2964	0.463409	0.829759	0.577422	0.711806	0.12186
1283	CASP10_Y9	CASP10	Y9			QGQHWYSSSDK	1	1.20652	0.108653	0.828722	0.542061	0.905192	0.141406	0.715229	0.19375
1284	CASP10_Y9_K14T	CASP10	Y9	K14T		QGQHWYSSSDT	1	1.52948	0.454959	0.829597	0.623699	0.827268	0.161289	1.0725	0.237729
1285	CASP5_Y103	CASP5	Y103			EEKKKYYDTKI	2	0.431905	0.18946	0.668943	0.111717	0.698202	0.0675126	0.565401	0.296302
1286	CASP5_Y103_T106A	CASP5	Y103	T106A		EEKKKYYDAKI	2	0.521211	0.259601	1.02212	0.434963	1.27965	0.235583	0.541136	0.115938
1287	CASP5_Y103_T106A_YF	CASP5	Y103	T106A	YF	EEKKKYFDAKI	1	0.445638	0.0998174	0.671576	0.181472	1.00708	0.265955	0.46436	0.232896
1288	CASP5_Y103_YF	CASP5	Y103		YF	EEKKKYFDTKI	1	0.461579	0.0470602	0.697901	0.124677	0.821187	0.39238	0.506202	0.1992
1289	CASP5_Y104	CASP5	Y104			EKKKYYDTKIE	2	0.498459	0.254493	0.505262	0.147098	0.751964	0.225753	0.439956	0.2803
1290	CASP5_Y104_T106A	CASP5	Y104	T106A		EKKKYYDAKIE	2	0.522484	0.136098	0.668171	0.20286	1.06588	0.431162	0.529239	0.358583
1291	CASP5_Y104_T106A_YF	CASP5	Y104	T106A	YF	EKKKFYDAKIE	1	0.452561	0.139107	0.783289	0.0987016	0.686055	0.102091	0.485849	0.244679
1292	CASP5_Y104_YF	CASP5	Y104		YF	EKKKFYDTKIE	1	0.42697	0.173473	0.436669	0.287437	0.636205	0.210068	0.457572	0.317376
1293	CASP5_Y74	CASP5	Y74			VKMLEYLGKDV	1	0.389446	0.081842	0.770136	0.255356	0.662026	0.0936443	0.674875	0.106663
1294	CASP5_Y74_L75R	CASP5	Y74	L75R		VKMLEYRGKDV	1	0.386289	0.128853	0.628053	0.143453	0.61799	0.148175	0.435369	0.169651
1295	CASQ1_Y43	CASQ1	Y43			LDFPEYDGVDR	1	0.625268	0.316472	0.666748	0.512313	1.57543	0.971464	0.552264	0.334913
1296	CASQ1_Y43_D44N	CASQ1	Y43	D44N		LDFPEYNGVDR	1	0.97482	0.388334	0.646338	0.234745	0.54054	0.122841	1.25347	0.335246
1297	CASQ2_Y178	CASQ2	Y178			SEDSEYYKAFE	2	0.558099	0.177982	0.613886	0.257538	0.827126	0.184508	0.519207	0.346456
1298	CASQ2_Y178_K180R	CASQ2	Y178	K180R		SEDSEYYRAFE	2	0.470178	0.110203	0.670209	0.0484284	0.901131	0.145894	0.561305	0.232638
1299	CASQ2_Y178_K180R_YF	CASQ2	Y178	K180R	YF	SEDSEYFRAFE	1	0.438918	0.117207	0.558939	0.0933314	0.87358	0.134842	0.443212	0.229976
1300	CASQ2_Y178_YF	CASQ2	Y178		YF	SEDSEYFKAFE	1	0.543711	0.293644	0.709392	0.445535	0.86794	0.23368	0.46726	0.26392
1301	CASQ2_Y179	CASQ2	Y179			EDSEYYKAFEE	2	0.614326	0.216356	0.74752	0.396467	0.920954	0.251884	0.567615	0.335021
1302	CASQ2_Y179_K180R	CASQ2	Y179	K180R		EDSEYYRAFEE	2	0.411225	0.0974568	0.558807	0.148511	0.939363	0.10148	0.534404	0.361739
1303	CASQ2_Y179_K180R_YF	CASQ2	Y179	K180R	YF	EDSEFYRAFEE	1	0.750864	0.431925	0.681561	0.464827	0.962501	0.187765	0.543209	0.321172
1304	CASQ2_Y179_YF	CASQ2	Y179		YF	EDSEFYKAFEE	1	0.506077	0.155254	0.670682	0.0662935	0.767237	0.0870486	0.529136	0.26573
1305	CAT_Y358	CAT	Y358			GRLFAYPDTHR	1	0.508107	0.0281201	0.909033	0.171402	0.839792	0.263263	0.4678	0.185872
1306	CAT_Y358_R363C	CAT	Y358	R363C		GRLFAYPDTHC	1	0.530609	0.0789368	0.846157	0.245003	0.835117	0.256619	0.503565	0.198536
1307	CAT_Y386	CAT	Y386			ARVANYQRDGP	1	0.320065	0.142026	0.342062	0.131332	0.605957	0.312113	0.315319	0.201077
1308	CAT_Y386_Q387H	CAT	Y386	Q387H		ARVANYHRDGP	1	0.490063	0.176769	0.76933	0.125204	0.776236	0.0992889	0.566334	0.260364
1309	CBFB_Y96	CBFB	Y96			EAGKVYLKAPM	1	0.502767	0.328829	0.608966	0.26287	0.955643	0.431727	0.582349	0.294362
1310	CBFB_Y96_P100A	CBFB	Y96	P100A		EAGKVYLKAAM	1	0.461813	0.0557689	0.78077	0.267168	0.893063	0.265088	0.49718	0.242913
1311	CBL_Y368	CBL	Y368			VTQEQYELYCE	2	0.625436	0.277031	0.576826	0.240202	1.04521	0.056359	0.51312	0.216464
1312	CBL_Y368_Q367P	CBL	Y368	Q367P		VTQEPYELYCE	2	0.69548	0.242363	0.861278	0.204643	1.00761	0.222533	0.581277	0.316487
1313	CBL_Y368_Q367P_YF	CBL	Y368	Q367P	YF	VTQEPYELFCE	1	0.718558	0.0393075	0.94431	0.0551754	1.00582	0.229181	0.501273	0.231136
1314	CBL_Y368_Y371H	CBL	Y368	Y371H		VTQEQYELHCE	1	0.570709	0.0877239	0.480089	0.112725	0.655986	0.190174	0.54352	0.272333
1315	CBL_Y368_YF	CBL	Y368		YF	VTQEQYELFCE	1	0.667844	0.217668	0.746905	0.212876	0.942748	0.241251	0.478074	0.170469
1316	CBL_Y371	CBL	Y371			EQYELYCEMGS	2	0.628571	0.119684	0.775718	0.291285	0.890172	0.0585183	0.550111	0.128415
1317	CBL_Y371_Q367P	CBL	Y371	Q367P		EPYELYCEMGS	2	0.694874	0.259104	0.563741	0.28467	1.11372	0.105248	0.57035	0.240359
1318	CBL_Y371_Q367P_YF	CBL	Y371	Q367P	YF	EPFELYCEMGS	1	0.396656	0.088954	0.557933	0.104436	0.764037	0.336861	0.513558	0.243001
1319	CBL_Y371_Y371H	CBL	Y371	Y371H		EQYELHCEMGS	1	0.611197	0.0924457	0.85854	0.214117	0.814773	0.0584702	0.493848	0.203253
1320	CBL_Y371_Y371H_YF	CBL	Y371	Y371H	YF	EQFELHCEMGS	0	0.605763	0.121727	0.684776	0.103263	0.707408	0.192385	0.490842	0.35923
1321	CBL_Y371_YF	CBL	Y371		YF	EQFELYCEMGS	1	0.460281	0.0327083	0.637675	0.145045	0.93395	0.101462	0.616335	0.152657
1322	CBLC_Y402	CBLC	Y402			EAVSIYQFHGQ	1	0.4641	0.149129	0.510566	0.382768	0.756872	0.154702	0.49439	0.254419
1323	CBLC_Y402_H405Y	CBLC	Y402	H405Y		EAVSIYQFYGQ	2	0.574243	0.0257321	0.856837	0.326277	0.820876	0.191708	1.29306	0.941069
1324	CBLC_Y402_H405Y_YF	CBLC	Y402	H405Y	YF	EAVSIYQFFGQ	1	0.653723	0.0856594	0.881188	0.322952	0.921176	0.0929752	0.549985	0.128648
1325	CBR3_Y81	CBR3	Y81			FLRKEYGGLNV	1	0.435011	0.124372	0.432207	0.355566	0.66711	0.301076	0.57926	0.296083
1326	CBR3_Y81_L84V	CBR3	Y81	L84V		FLRKEYGGVNV	1	0.458207	0.136623	0.698401	0.259599	0.983543	0.164848	0.610409	0.374239
1327	CBS_Y308	CBS	Y308			VEGIGYDFIPT	1	7.7052	1.99611	1.02418	0.177363	0.790385	0.132212	1.45615	0.603781
1328	CBS_Y308_G305R	CBS	Y308	G305R		VERIGYDFIPT	1	3.48634	1.2508	0.685622	0.151803	0.933918	0.149844	1.28874	0.666754
1329	CBS_Y308_G307S	CBS	Y308	G307S		VEGISYDFIPT	1	2.10657	0.401315	0.633242	0.119993	0.654041	0.158905	0.802559	0.110162
1330	CBX8_Y321	CBX8	Y321			SGGGLYRDMGA	1	0.541632	0.0584502	0.588601	0.206029	0.841585	0.102672	1.49015	1.26652
1331	CBX8_Y321_G317V	CBX8	Y321	G317V		SVGGLYRDMGA	1	0.393474	0.0486837	0.530103	0.132727	0.720054	0.344659	1.57363	1.34033
1332	CC2D2A_Y381	CC2D2A	Y381			ELETLYKKAVK	1	0.458299	0.173002	0.589002	0.258499	0.809014	0.181245	0.478332	0.149405
1333	CC2D2A_Y381_E376A	CC2D2A	Y381	E376A		ALETLYKKAVK	1	0.51087	0.210373	0.598861	0.195089	0.889464	0.143529	0.588331	0.258928
1334	CC2D2A_Y683	CC2D2A	Y683			KKRSVYLKVLF	1	0.678679	0.0747554	0.982827	0.452299	0.869246	0.092129	0.58292	0.229664
1335	CC2D2A_Y683_L684I	CC2D2A	Y683	L684I		KKRSVYIKVLF	1	0.547745	0.233863	0.646047	0.253228	1.09869	0.0886948	0.537346	0.177795
1336	CCBE1_Y70	CCBE1	Y70			ELTTCYRKKCC	1	0.741113	0.314165	0.87283	0.453135	1.02235	0.218848	0.665606	0.376141
1337	CCBE1_Y70_C75S	CCBE1	Y70	C75S		ELTTCYRKKCS	1	1.04299	0.729514	0.741471	0.209291	1.24813	0.370414	0.673493	0.135095
1338	CCDC102B_Y299	CCDC102B	Y299			LWKWKYEELKE	1	0.81019	0.110893	0.808053	0.452898	1.42983	0.752306	0.746482	0.402924
1339	CCDC102B_Y299_K298R	CCDC102B	Y299	K298R		LWKWRYEELKE	1	2.0797	0.381134	1.3584	0.825524	1.29117	0.432157	1.04263	0.795995
1340	CCDC116_Y291	CCDC116	Y291			LDLPGYCPLRE	1	0.611441	0.205483	0.736124	0.168993	0.754167	0.405923	0.770824	0.166191
1341	CCDC116_Y291_P293L	CCDC116	Y291	P293L		LDLPGYCLLRE	1	0.660669	0.300802	0.673597	0.459978	0.686002	0.139066	0.622361	0.0348475
1342	CCDC137_Y125	CCDC137	Y125			ESDGAYIHRMQ	1	0.541009	0.139872	0.656462	0.202499	0.857101	0.127947	0.606935	0.247502
1343	CCDC137_Y125_H127Q	CCDC137	Y125	H127Q		ESDGAYIQRMQ	1	0.468122	0.138752	0.708415	0.348872	0.730733	0.113411	0.72026	0.168013
1344	CCDC151_Y542	CCDC151	Y542			GRLPEYNTRIA	1	0.481867	0.142471	0.643092	0.0875658	0.949252	0.119379	0.914627	0.422776
1345	CCDC151_Y542_R545P	CCDC151	Y542	R545P		GRLPEYNTPIA	1	0.840782	0.131356	0.47872	0.297774	0.807432	0.247251	2.04873	1.25833
1346	CCDC170_Y323	CCDC170	Y323			TSQSQYFSFRE	1	0.796279	0.326338	0.999008	0.499673	1.14572	0.500292	2.25073	0.519601
1347	CCDC170_Y323_F324S	CCDC170	Y323	F324S		TSQSQYSSFRE	1	0.662935	0.233018	0.778525	0.358821	1.10384	0.254043	1.21194	0.368295
1348	CCDC178_Y422	CCDC178	Y422			AVNDFYAAKKT	1	0.457189	0.21813	0.869643	0.127386	1.07071	0.203547	0.533478	0.180167
1349	CCDC178_Y422_D420N	CCDC178	Y422	D420N		AVNNFYAAKKT	1	0.518166	0.194189	0.744531	0.363099	0.964868	0.305106	0.557618	0.286453
1350	CCDC39_Y593	CCDC39	Y593			RKQQLYTAMEE	1	3.24771	0.850793	0.575867	0.313563	1.28892	0.462743	0.769779	0.326824
1351	CCDC39_Y593_T594I	CCDC39	Y593	T594I		RKQQLYIAMEE	1	0.937722	0.0714536	0.90942	0.17362	0.915914	0.340072	0.51512	0.27541
1352	CCDC42_Y149	CCDC42	Y149			AKLKDYYIFNK	2	0.82329	0.425015	0.711112	0.104203	1.00487	0.419761	1.37704	0.224567
1353	CCDC42_Y149_A144T	CCDC42	Y149	A144T		TKLKDYYIFNK	2	0.879576	0.329584	1.09827	0.359356	1.04875	0.192795	1.38786	0.0372859
1354	CCDC42_Y149_A144T_YF	CCDC42	Y149	A144T	YF	TKLKDYFIFNK	1	0.724123	0.261896	0.594656	0.333208	0.773178	0.130213	1.10608	0.274289
1355	CCDC42_Y149_YF	CCDC42	Y149		YF	AKLKDYFIFNK	1	0.845781	0.280239	0.847496	0.389609	1.37182	0.102543	1.45622	0.224027
1356	CCDC60_Y41	CCDC60	Y41			MKSIKYMDKEI	1	0.405374	0.136427	0.524712	0.175963	0.796622	0.122654	0.401071	0.166013
1357	CCDC60_Y41_I46V	CCDC60	Y41	I46V		MKSIKYMDKEV	1	0.413495	0.174323	0.515403	0.226236	0.742358	0.133641	0.399973	0.255536
1358	CCDC70_Y125	CCDC70	Y125			TFWKKYRTFWK	1	0.516802	0.124055	1.18071	0.23651	0.84293	0.207108	0.524104	0.268088
1359	CCDC70_Y125_R126C	CCDC70	Y125	R126C		TFWKKYCTFWK	1	0.517368	0.239204	0.594111	0.443916	1.10549	0.25621	0.636835	0.342681
1360	CCDC82_Y331	CCDC82	Y331			KQNSLYSFSDH	1	0.466044	0.107873	0.609389	0.0976194	0.764689	0.27148	1.65786	1.22202
1361	CCDC82_Y331_Q327R	CCDC82	Y331	Q327R		KRNSLYSFSDH	1	0.548013	0.0722733	0.845964	0.258446	0.890011	0.22823	0.886961	0.0759271
1362	CCDC88B_Y1277	CCDC88B	Y1277			REQREYLDQLN	1	0.424531	0.0829905	0.469888	0.0865113	0.588867	0.137178	0.54131	0.265931
1363	CCDC88B_Y1277_D1279E	CCDC88B	Y1277	D1279E		REQREYLEQLN	1	0.520436	0.410153	0.729721	0.517458	0.678821	0.143676	0.44897	0.132986
1364	CCDC93_Y176	CCDC93	Y176			DLSEVYKPRRK	1	0.314644	0.159425	0.48116	0.416918	0.413532	0.0925673	0.294853	0.223573
1365	CCDC93_Y176_R179C	CCDC93	Y176	R179C		DLSEVYKPCRK	1	0.527975	0.135216	0.852779	0.165976	0.963496	0.344457	0.639138	0.325517
1366	CCDC93_Y209	CCDC93	Y209			EYGRRYGFSRQ	2	0.474433	0.249425	0.571553	0.109734	0.675992	0.0435447	0.351949	0.204174
1367	CCDC93_Y209_R213C	CCDC93	Y209	R213C		EYGRRYGFSCQ	2	0.417569	0.0987536	0.492313	0.141502	0.725171	0.152496	0.538574	0.17917
1368	CCDC93_Y209_R213C_YF	CCDC93	Y209	R213C	YF	EFGRRYGFSCQ	1	0.494634	0.0523047	0.634969	0.214525	0.855623	0.132151	0.531522	0.19647
1369	CCDC93_Y209_YF	CCDC93	Y209		YF	EFGRRYGFSRQ	1	0.545692	0.146151	0.507852	0.318759	0.685876	0.157853	0.269059	0.199675
1370	CCNB1IP1_Y125	CCNB1IP1	Y125			QMEKIYTQQIQ	1	0.478412	0.147494	0.398374	0.196743	0.807174	0.266216	0.741717	0.0898643
1371	CCNB1IP1_Y125_Y125C	CCNB1IP1	Y125	Y125C		QMEKICTQQIQ	0	0.486212	0.0355846	0.558384	0.201222	0.83419	0.326984	0.535619	0.232494
1372	CCPG1_Y569	CCPG1	Y569			TVFSDYLHPQY	2	0.541028	0.187833	0.760238	0.17925	0.879655	0.165159	1.33075	0.137601
1373	CCPG1_Y569_F566S	CCPG1	Y569	F566S		TVSSDYLHPQY	2	0.762141	0.322222	0.879891	0.424481	1.20681	0.322942	0.902347	0.394841
1374	CCPG1_Y569_F566S_YF	CCPG1	Y569	F566S	YF	TVSSDYLHPQF	1	0.527076	0.183647	0.704009	0.0923344	0.847909	0.122764	0.454932	0.256515
1375	CCPG1_Y569_YF	CCPG1	Y569		YF	TVFSDYLHPQF	1	0.591073	0.149622	0.756656	0.378715	0.666649	0.0390343	0.495241	0.15699
1376	CCR5_Y297	CCR5	Y297			INPIIYAFVGE	1	0.460111	0.0787135	0.599618	0.0682194	0.776486	0.211101	0.529204	0.240702
1377	CCR5_Y297_E302G	CCR5	Y297	E302G		INPIIYAFVGG	1	0.491217	0.0652599	0.569764	0.0683169	0.745737	0.21001	0.541555	0.215011
1378	CCR5_Y297_G301V	CCR5	Y297	G301V		INPIIYAFVVE	1	0.401918	0.146425	0.729749	0.187541	0.912267	0.313785	0.461105	0.212863
1379	CCR5_Y339	CCR5	Y339			RASSVYTRSTG	1	0.471822	0.289675	0.488515	0.301245	0.80897	0.191525	0.437059	0.280369
1380	CCR5_Y339_A335V	CCR5	Y339	A335V		RVSSVYTRSTG	1	0.517061	0.300944	1.10274	0.744076	1.1733	0.414226	0.960167	0.398397
1381	CCR5_Y339_Y339F	CCR5	Y339	Y339F		RASSVFTRSTG	0	0.455067	0.257317	0.77841	0.161947	0.644467	0.0524073	0.405635	0.251992
1382	CCRL2_Y170	CCRL2	Y170			PEFVVYKPQME	1	0.635419	0.241767	0.685886	0.334056	1.02413	0.177161	0.819378	0.329393
1383	CCRL2_Y170_F167Y	CCRL2	Y170	F167Y		PEYVVYKPQME	2	0.438522	0.157218	1.04567	0.626897	0.913359	0.306459	1.22068	0.210841
1384	CCRL2_Y170_V168M	CCRL2	Y170	V168M		PEFMVYKPQME	1	0.456962	0.200115	0.635212	0.129143	0.794285	0.272094	0.948943	0.0716258
1385	CCT6A_Y229	CCT6A	Y229			RVEDAYILTCN	1	0.670631	0.145364	0.540134	0.214397	0.662581	0.126728	0.493152	0.27627
1386	CCT6A_Y229_Y229C	CCT6A	Y229	Y229C		RVEDACILTCN	0	0.656717	0.181411	0.738334	0.282897	0.849854	0.148885	0.403742	0.241938
1387	CCT6B_Y250	CCT6B	Y250			NSGFFYKTAEE	1	0.545875	0.143238	0.586371	0.251977	0.734161	0.174873	0.515582	0.181301
1388	CCT6B_Y250_G247A	CCT6B	Y250	G247A		NSAFFYKTAEE	1	0.5651	0.142224	0.92333	0.240646	1.19179	0.23697	0.685327	0.337273
1389	CCT7_Y263	CCT7	Y263			HTVEDYQAIVD	1	0.464783	0.228923	0.80659	0.211549	0.815813	0.297876	0.401252	0.207469
1390	CCT7_Y263_T259A	CCT7	Y263	T259A		HAVEDYQAIVD	1	0.695712	0.117071	0.768205	0.343062	1.08683	0.239539	0.588936	0.322548
1391	CD19_Y378	CD19	Y378			GTAPSYGNPSS	1	0.450254	0.156793	0.55552	0.298867	0.906554	0.244845	0.64319	0.198947
1392	CD19_Y378_G373S	CD19	Y378	G373S		STAPSYGNPSS	1	0.457781	0.164918	0.694085	0.295419	0.743801	0.0901161	0.494845	0.275436
1393	CD200R1L_Y138	CD200R1L	Y138			NFHRGYHLQVL	1	0.539906	0.080628	0.826962	0.288621	0.962877	0.442106	0.746286	0.270168
1394	CD200R1L_Y138_H135R	CD200R1L	Y138	H135R		NFRRGYHLQVL	1	0.752773	0.0593716	0.713273	0.195462	0.846513	0.0954377	0.515553	0.264104
1395	CD207_Y217	CD207	Y217			IPKTWYSAEQF	1	0.573704	0.163092	0.91407	0.336486	0.876388	0.185284	1.67269	0.309349
1396	CD207_Y217_P213S	CD207	Y217	P213S		ISKTWYSAEQF	1	0.689045	0.028231	0.781333	0.389789	0.821622	0.275029	2.98013	1.80255
1397	CD209_Y239	CD209	Y239			KQQEIYQELTQ	1	0.584523	0.11714	0.67293	0.228813	1.13675	0.3972	0.756203	0.404458
1398	CD209_Y239_L242V	CD209	Y239	L242V		KQQEIYQEVTQ	1	0.513146	0.215118	0.784671	0.23897	0.929429	0.119051	0.551385	0.338044
1399	CD3D_Y149	CD3D	Y149			RNDQVYQPLRD	1	0.663178	0.338941	0.491235	0.321925	0.786631	0.128964	0.95406	0.263462
1400	CD3D_Y149_Q147R	CD3D	Y149	Q147R		RNDRVYQPLRD	1	0.943035	0.0994268	0.726963	0.235331	0.845418	0.116895	1.08702	0.111338
1401	CD3E_Y199	CD3E	Y199			GQRDLYSGLNQ	1	0.821661	0.324145	0.5737	0.366815	0.852212	0.337751	2.90398	1.93925
1402	CD3E_Y199_Q204E	CD3E	Y199	Q204E		GQRDLYSGLNE	1	0.723748	0.129059	0.639948	0.0797589	0.878433	0.162107	1.64454	1.17709
1403	CD44_Y412	CD44	Y412			RWHEGYRQTPK	1	0.897585	0.593667	1.72543	1.48471	1.46633	0.628196	0.911262	0.260673
1404	CD44_Y412_K417R	CD44	Y412	K417R		RWHEGYRQTPR	1	1.70113	1.70031	1.23371	0.52356	1.43179	0.064515	0.951789	0.145309
1405	CD5_Y465	CD5	Y465			SHLSAYPALEG	1	0.618176	0.299328	0.687299	0.348141	0.897031	0.133912	0.353861	0.217893
1406	CD5_Y465_H461R	CD5	Y465	H461R		SRLSAYPALEG	1	0.437246	0.0811533	0.689965	0.430666	0.898721	0.0752043	0.367738	0.283752
1407	CD5_Y465_Y465F	CD5	Y465	Y465F		SHLSAFPALEG	0	0.529477	0.274721	0.750753	0.390978	0.733503	0.329093	0.379164	0.207452
1408	CD55_Y245	CD55	Y245			RDHYGYRQSVT	2	0.483759	0.135538	0.775244	0.356273	0.980471	0.0827142	0.871369	0.108609
1409	CD55_Y245_R240H	CD55	Y245	R240H		HDHYGYRQSVT	2	0.65371	0.113227	0.833239	0.167511	0.895052	0.0906331	1.26098	0.17539
1410	CD55_Y245_R240H_YF	CD55	Y245	R240H	YF	HDHFGYRQSVT	1	0.627982	0.102826	0.87103	0.363899	0.802989	0.0415906	0.540099	0.205979
1411	CD55_Y245_YF	CD55	Y245		YF	RDHFGYRQSVT	1	0.628505	0.141718	0.819564	0.187807	0.644175	0.164462	0.636054	0.232009
1412	CD55_Y266	CD55	Y266			GEHSIYCTVNN	1	0.480382	0.222427	0.639003	0.214881	0.598145	0.16628	0.481252	0.153787
1413	CD55_Y266_C267S	CD55	Y266	C267S		GEHSIYSTVNN	1	0.71782	0.118838	1.592	0.505369	0.650524	0.215639	0.389397	0.231237
1414	CD59_Y86	CD59	Y86			ENELTYYCCKK	2	0.483069	0.19353	0.819668	0.587265	0.953181	0.112873	0.708767	0.211693
1415	CD59_Y86_C89Y	CD59	Y86	C89Y		ENELTYYCYKK	3	0.450044	0.171718	0.649933	0.157736	0.793489	0.198719	0.64855	0.225793
1416	CD59_Y86_C89Y_YF	CD59	Y86	C89Y	YF	ENELTYFCFKK	1	0.413749	0.114111	0.59978	0.0903319	0.745792	0.210979	0.500084	0.205746
1417	CD59_Y86_YF	CD59	Y86		YF	ENELTYFCCKK	1	0.711432	0.326793	0.93487	0.643741	0.974586	0.0833509	1.03077	0.203332
1418	CD59_Y87	CD59	Y87			NELTYYCCKKD	2	0.437534	0.0146121	0.765999	0.0619657	0.780479	0.13009	1.03065	0.205676
1419	CD59_Y87_C89Y	CD59	Y87	C89Y		NELTYYCYKKD	3	0.481854	0.0695141	0.50526	0.0147138	0.728071	0.106133	0.843693	0.196067
1420	CD59_Y87_C89Y_YF	CD59	Y87	C89Y	YF	NELTFYCFKKD	1	0.403577	0.220472	0.504377	0.162012	0.753748	0.157394	0.450294	0.197919
1421	CD59_Y87_YF	CD59	Y87		YF	NELTFYCCKKD	1	0.503409	0.122034	0.706892	0.330494	0.937868	0.351143	0.522929	0.294497
1422	CDA_Y79	CDA	Y79			AVSEGYKDFRA	1	0.38497	0.0868238	0.554355	0.259797	0.687113	0.179687	0.474412	0.239933
1423	CDA_Y79_V75I	CDA	Y79	V75I		AISEGYKDFRA	1	0.30997	0.0252018	0.536093	0.280073	0.828709	0.288585	0.401126	0.235545
1424	CDAN1_Y712	CDAN1	Y712			VPLLEYYRDIF	2	1.0534	0.267239	0.968426	0.0686765	0.910702	0.276683	2.76733	1.70811
1425	CDAN1_Y712_R714W	CDAN1	Y712	R714W		VPLLEYYWDIF	2	1.12107	0.349588	1.08331	0.11886	1.54541	0.351368	1.29136	0.250846
1426	CDAN1_Y712_R714W_YF	CDAN1	Y712	R714W	YF	VPLLEYFWDIF	1	1.67724	0.574714	2.12383	0.501632	1.79922	0.619007	1.5736	0.760216
1427	CDAN1_Y712_YF	CDAN1	Y712		YF	VPLLEYFRDIF	1	1.12773	0.360969	1.37619	0.224326	1.43967	0.317848	1.19031	0.243402
1428	CDAN1_Y713	CDAN1	Y713			PLLEYYRDIFT	2	1.04166	0.473902	0.776567	0.168466	1.15899	0.10721	4.28998	4.00795
1429	CDAN1_Y713_R714W	CDAN1	Y713	R714W		PLLEYYWDIFT	2	0.95867	0.246451	1.24946	0.315745	1.25095	0.211919	1.11906	0.395644
1430	CDAN1_Y713_R714W_YF	CDAN1	Y713	R714W	YF	PLLEFYWDIFT	1	0.526746	0.272017	0.719385	0.346811	0.925858	0.35232	0.590135	0.158509
1431	CDAN1_Y713_YF	CDAN1	Y713		YF	PLLEFYRDIFT	1	0.472806	0.12856	0.966098	0.350409	0.856716	0.134704	0.766781	0.223611
1432	CDC14A_Y591	CDC14A	Y591			SLQSEYVHYGG	2	0.533204	0.0301228	0.690399	0.233619	0.587025	0.0619424	0.407989	0.152219
1433	CDC14A_Y591_S589F	CDC14A	Y591	S589F		SLQFEYVHYGG	2	0.609413	0.282286	0.52274	0.153316	0.685998	0.106579	0.505119	0.225195
1434	CDC14A_Y591_S589F_YF	CDC14A	Y591	S589F	YF	SLQFEYVHFGG	1	0.643239	0.109446	0.92512	0.108402	1.0797	0.370983	0.631486	0.361963
1435	CDC14A_Y591_YF	CDC14A	Y591		YF	SLQSEYVHFGG	1	0.629264	0.0791878	0.992715	0.547524	0.899165	0.295837	0.419028	0.277153
1436	CDC14C_Y132	CDC14C	Y132			FGDTPYIPFRD	1	0.601658	0.315219	0.757248	0.216473	0.808963	0.176043	0.683682	0.313028
1437	CDC14C_Y132_P131S	CDC14C	Y132	P131S		FGDTSYIPFRD	1	0.536349	0.258373	0.598622	0.243351	0.800101	0.200973	0.64583	0.205707
1438	CDC42_Y64	CDC42	Y64			AGQEDYDRLRP	1	0.609338	0.117324	0.698034	0.0856551	0.824646	0.126685	0.512933	0.296892
1439	CDC42_Y64_Y64C	CDC42	Y64	Y64C		AGQEDCDRLRP	0	0.548353	0.357782	0.945469	0.130402	1.07205	0.190624	0.607612	0.403676
1440	CDC42BPB_Y1638	CDC42BPB	Y1638			SRNKPYISWPS	1	1.32282	0.605834	1.51371	0.576445	1.60993	0.184402	1.6565	0.859781
1441	CDC42BPB_Y1638_S1633Y	CDC42BPB	Y1638	S1633Y		YRNKPYISWPS	2	1.2866	0.504313	1.63827	0.260428	1.86928	0.245917	1.8498	0.602541
1442	CDC42BPB_Y1638_S1633Y_YF	CDC42BPB	Y1638	S1633Y	YF	FRNKPYISWPS	1	1.603	1.13069	1.77149	0.769911	1.98994	0.43703	1.63173	0.343905
1443	CDC5L_Y459	CDC5L	Y459			DGMADYSDPSY	2	0.458777	0.151474	0.61588	0.0702503	0.832676	0.0440304	0.61434	0.154773
1444	CDC5L_Y459_Y459C	CDC5L	Y459	Y459C		DGMADCSDPSY	1	0.615429	0.284144	0.628716	0.350709	1.22272	0.337071	0.690177	0.337289
1445	CDC5L_Y459_Y459C_YF	CDC5L	Y459	Y459C	YF	DGMADCSDPSF	0	0.634624	0.319851	0.853206	0.125605	0.984215	0.22248	0.480345	0.213931
1446	CDC5L_Y459_YF	CDC5L	Y459		YF	DGMADYSDPSF	1	0.557476	0.124607	0.661881	0.203862	0.781415	0.106274	0.518248	0.264205
1447	CDC5L_Y464	CDC5L	Y464			YSDPSYVKQME	2	1.04668	0.141735	0.608429	0.0687696	0.799697	0.368055	1.11193	0.0390918
1448	CDC5L_Y464_Y459C	CDC5L	Y464	Y459C		CSDPSYVKQME	1	0.514852	0.10246	0.665616	0.0294729	0.882176	0.285324	0.640252	0.162174
1449	CDC5L_Y464_YF	CDC5L	Y464		YF	FSDPSYVKQME	1	0.517926	0.256461	0.892142	0.176226	0.882594	0.351903	0.845616	0.375379
1450	CDC73_Y290	CDC73	Y290			PIPAAYNRYDQ	2	0.499971	0.173134	0.559005	0.244824	0.750422	0.0850227	1.14189	0.167347
1451	CDC73_Y290_R292K	CDC73	Y290	R292K		PIPAAYNKYDQ	2	0.477623	0.140508	1.32634	1.4871	0.39048	0.0555659	0.638543	0.234097
1452	CDC73_Y290_R292K_YF	CDC73	Y290	R292K	YF	PIPAAYNKFDQ	1	0.509109	0.248349	0.85995	0.673976	0.946207	0.318385	0.556294	0.261135
1453	CDC73_Y290_YF	CDC73	Y290		YF	PIPAAYNRFDQ	1	0.579076	0.237079	0.647923	0.404832	0.792096	0.473397	0.857552	0.131834
1454	CDC73_Y293	CDC73	Y293			AAYNRYDQERF	2	0.496734	0.253256	0.584952	0.109648	0.737108	0.150239	1.14582	0.336922
1455	CDC73_Y293_R292K	CDC73	Y293	R292K		AAYNKYDQERF	2	0.580322	0.262094	0.862877	0.0881957	0.923011	0.201299	1.00727	0.129774
1456	CDC73_Y293_R292K_YF	CDC73	Y293	R292K	YF	AAFNKYDQERF	1	0.439618	0.180552	0.776385	0.223891	0.866872	0.0651671	0.352456	0.256622
1457	CDC73_Y293_YF	CDC73	Y293		YF	AAFNRYDQERF	1	0.447645	0.188041	0.549461	0.170845	0.866454	0.304562	0.43188	0.225827
1458	CDCP1_Y707	CDCP1	Y707			PAVGIYNDNIN	1	0.480755	0.208537	0.728546	0.344328	0.749316	0.210589	2.27447	0.959334
1459	CDCP1_Y707_D709G	CDCP1	Y707	D709G		PAVGIYNGNIN	1	0.44022	0.327034	0.708212	0.194657	0.695964	0.367282	2.44567	1.01666
1460	CDH1_Y68	CDH1	Y68			RQRTAYFSLDT	1	1.73773	0.174995	11.2542	1.81654	0.928133	0.554406	1.43703	0.595438
1461	CDH1_Y68_D72N	CDH1	Y68	D72N		RQRTAYFSLNT	1	0.871412	0.316214	14.9063	8.96164	0.901336	0.117975	1.34041	0.618175
1462	CDH1_Y876	CDH1	Y876			KLADMYGGGED	1	0.558171	0.109459	0.747947	0.273712	0.811861	0.281639	0.469106	0.210728
1463	CDH1_Y876_E880K	CDH1	Y876	E880K		KLADMYGGGKD	1	0.412042	0.109387	0.37597	0.245556	0.77906	0.0592213	0.611645	0.0563771
1464	CDH13_Y66	CDH13	Y66			NDKLRYEVSSP	1	0.473021	0.188244	0.567097	0.0758469	0.710662	0.219854	0.671225	0.1557
1465	CDH13_Y66_R65C	CDH13	Y66	R65C		NDKLCYEVSSP	1	0.413252	0.00423625	0.497698	0.139676	0.568643	0.186237	0.496868	0.236275
1466	CDH17_Y489	CDH17	Y489			SSKILYHIIKG	1	6.58816	0.594654	3.77742	0.848706	0.958135	0.161249	1.22396	0.171882
1467	CDH17_Y489_K486E	CDH17	Y489	K486E		SSEILYHIIKG	1	2.39552	0.348085	1.18431	0.238736	1.19673	0.285169	0.802216	0.302882
1468	CDH17_Y489_S484I	CDH17	Y489	S484I		ISKILYHIIKG	1	3.02504	1.11014	1.99841	0.464556	1.74798	0.0957054	1.25239	0.49342
1469	CDH23_Y1672	CDH23	Y1672			NGTVTYAIVAG	1	1.23698	0.37074	12.83	4.12722	0.655167	0.11153	0.508262	0.246166
1470	CDH23_Y1672_T1671S	CDH23	Y1672	T1671S		NGTVSYAIVAG	1	3.87553	0.267328	46.5029	25.8056	0.873288	0.0662592	0.885315	0.161228
1471	CDH23_Y1672_V1675I	CDH23	Y1672	V1675I		NGTVTYAIIAG	1	1.43016	0.367084	16.6463	6.00317	0.779533	0.147055	0.500856	0.287186
1472	CDH23_Y2949	CDH23	Y2949			AIIGIYILRDD	1	1.04191	0.281467	1.11265	0.231362	1.46669	0.352136	1.17877	0.399888
1473	CDH23_Y2949_D2954N	CDH23	Y2949	D2954N		AIIGIYILRDN	1	0.987253	0.267399	1.41712	0.54822	1.442	0.600571	1.11657	0.501847
1474	CDH23_Y2949_I2950N	CDH23	Y2949	I2950N		AIIGIYNLRDD	1	0.80538	0.252138	0.950543	0.176136	1.13562	0.18638	1.60452	0.315051
1475	CDH4_Y205	CDH4	Y205			DIPIRYSITGV	1	0.530147	0.136826	0.971881	0.448349	0.773809	0.162133	0.537369	0.224119
1476	CDH4_Y205_T208M	CDH4	Y205	T208M		DIPIRYSIMGV	1	1.31256	0.410486	2.50802	0.673143	0.894209	0.321258	0.907586	0.228972
1477	CDH5_Y223	CDH5	Y223			EKQARYEIVVE	1	11.044	2.17283	0.666453	0.457388	0.856266	0.14404	0.693437	0.131662
1478	CDH5_Y223_V227E	CDH5	Y223	V227E		EKQARYEIVEE	1	18.8104	2.58985	0.920639	0.240768	0.897048	0.28092	0.732099	0.299942
1479	CDH5_Y82	CDH5	Y82			RKNAKYLLKGE	1	0.748578	0.228997	1.05643	0.72588	1.18937	0.582187	0.319918	0.18849
1480	CDH5_Y82_N79T	CDH5	Y82	N79T		RKTAKYLLKGE	1	0.460502	0.178016	0.708672	0.16358	0.861221	0.162526	0.230864	0.0765567
1481	CDK11B_Y449	CDK11B	Y449			IEEGTYGVVYR	2	0.450895	0.181215	0.668366	0.104858	0.834283	0.062971	0.698195	0.226505
1482	CDK11B_Y449_V452A	CDK11B	Y449	V452A		IEEGTYGVAYR	2	0.471304	0.132404	0.661681	0.0654559	0.681479	0.133201	0.602503	0.128642
1483	CDK11B_Y449_V452A_YF	CDK11B	Y449	V452A	YF	IEEGTYGVAFR	1	0.37366	0.197043	0.510135	0.129806	0.612329	0.0421549	0.475235	0.249206
1484	CDK11B_Y449_YF	CDK11B	Y449		YF	IEEGTYGVVFR	1	0.34947	0.0775595	0.466983	0.169202	0.721645	0.0778903	0.437927	0.230952
1485	CDK11B_Y453	CDK11B	Y453			TYGVVYRAKDK	2	0.49091	0.218763	0.717741	0.245936	1.10867	0.316918	0.684226	0.139776
1486	CDK11B_Y453_V452A	CDK11B	Y453	V452A		TYGVAYRAKDK	2	0.479874	0.179092	0.881541	0.131892	0.881481	0.196902	0.384748	0.17353
1487	CDK11B_Y453_V452A_YF	CDK11B	Y453	V452A	YF	TFGVAYRAKDK	1	0.507343	0.26312	0.674036	0.0301092	0.842061	0.364702	0.331874	0.181905
1488	CDK11B_Y453_YF	CDK11B	Y453		YF	TFGVVYRAKDK	1	0.42599	0.0861378	0.640418	0.528016	0.807872	0.230816	0.393099	0.259079
1489	CDK13_Y351	CDK13	Y351			GGSSPYSRRLP	1	0.524518	0.0503924	0.609417	0.422079	0.708949	0.0671183	0.421832	0.168033
1490	CDK13_Y351_P356A	CDK13	Y351	P356A		GGSSPYSRRLA	1	0.616941	0.360592	1.11188	0.49884	0.87468	0.259819	0.377268	0.197323
1491	CDK13_Y399	CDK13	Y399			RSRSPYSPVLR	1	0.659648	0.457773	1.46609	1.25381	1.19953	0.223848	0.688115	0.699208
1492	CDK13_Y399_L403F	CDK13	Y399	L403F		RSRSPYSPVFR	1	0.462773	0.214182	0.404501	0.20196	0.705596	0.335629	0.299031	0.138746
1493	CDK13_Y415	CDK13	Y415			RSRSPYSSRHS	1	0.433418	0.116801	0.542539	0.246926	0.793425	0.673527	0.259087	0.142451
1494	CDK13_Y415_R410Q	CDK13	Y415	R410Q		QSRSPYSSRHS	1	0.548912	0.44298	0.851713	0.471526	1.19477	0.80859	0.645416	0.477677
1495	CDK13_Y716	CDK13	Y716			IGEGTYGQVYK	2	0.471384	0.184377	0.943794	0.441191	0.666538	0.0903966	0.664291	0.232784
1496	CDK13_Y716_G714R	CDK13	Y716	G714R		IGERTYGQVYK	2	0.564783	0.145069	0.675107	0.19086	0.866102	0.224921	0.811234	0.134904
1497	CDK13_Y716_G714R_YF	CDK13	Y716	G714R	YF	IGERTYGQVFK	1	0.518867	0.110873	0.753794	0.279399	0.857276	0.0711126	0.662178	0.212642
1498	CDK13_Y716_G717R	CDK13	Y716	G717R		IGEGTYRQVYK	2	0.589401	0.150118	0.889558	0.351739	0.87383	0.151991	1.05402	0.306305
1499	CDK13_Y716_G717R_YF	CDK13	Y716	G717R	YF	IGEGTYRQVFK	1	0.409692	0.0318444	0.504717	0.467652	0.732312	0.314388	0.715886	0.091885
1500	CDK13_Y716_YF	CDK13	Y716		YF	IGEGTYGQVFK	1	0.425913	0.158697	0.808461	0.145627	0.774251	0.18941	0.467695	0.281545
1501	CDK2_Y15	CDK2	Y15			IGEGTYGVVYK	2	0.506766	0.16509	0.535404	0.0871917	0.730086	0.17685	0.6655	0.114913
1502	CDK2_Y15_V18L	CDK2	Y15	V18L		IGEGTYGVLYK	2	0.381151	0.141317	0.514049	0.161345	0.635087	0.161363	0.54865	0.109597
1503	CDK2_Y15_V18L_YF	CDK2	Y15	V18L	YF	IGEGTYGVLFK	1	0.387187	0.140077	0.800326	0.162849	0.88235	0.17425	0.471144	0.241961
1504	CDK2_Y15_Y15S	CDK2	Y15	Y15S		IGEGTSGVVYK	1	0.360761	0.0978482	0.56159	0.125881	0.638586	0.172505	0.356145	0.16128
1505	CDK2_Y15_Y15S_YF	CDK2	Y15	Y15S	YF	IGEGTSGVVFK	0	0.515241	0.276612	0.785531	0.349543	0.844466	0.211135	0.490545	0.348646
1506	CDK2_Y15_YF	CDK2	Y15		YF	IGEGTYGVVFK	1	0.457439	0.188108	0.655394	0.0664696	0.799056	0.184856	0.588931	0.255029
1507	CDK2_Y19	CDK2	Y19			TYGVVYKARNK	2	0.54842	0.458743	0.252538	0.264435	0.788229	0.392037	0.302196	0.198684
1508	CDK2_Y19_V18L	CDK2	Y19	V18L		TYGVLYKARNK	2	0.406284	0.0906144	0.623981	0.333668	0.961826	0.36861	0.417114	0.252795
1509	CDK2_Y19_V18L_YF	CDK2	Y19	V18L	YF	TFGVLYKARNK	1	0.489659	0.179235	0.423412	0.272312	0.827534	0.10083	0.296738	0.183104
1510	CDK2_Y19_Y15S	CDK2	Y19	Y15S		TSGVVYKARNK	1	0.565306	0.376681	0.866018	0.242129	0.741501	0.377313	0.371322	0.216018
1511	CDK2_Y19_YF	CDK2	Y19		YF	TFGVVYKARNK	1	0.49491	0.191191	0.671058	0.341567	0.801403	0.112349	0.460767	0.246714
1512	CDK5_Y15	CDK5	Y15			IGEGTYGTVFK	1	0.433562	0.13724	0.703207	0.129438	0.698519	0.254819	0.442501	0.221758
1513	CDK5_Y15_G16R	CDK5	Y15	G16R		IGEGTYRTVFK	1	0.46967	0.0834163	0.613943	0.324239	0.674154	0.171175	0.863273	0.380977
1514	CDKL5_Y171	CDKL5	Y171			ANYTEYVATRW	2	0.514841	0.112444	0.997895	0.213531	0.91483	0.395805	0.795621	0.101246
1515	CDKL5_Y171_R175S	CDKL5	Y171	R175S		ANYTEYVATSW	2	0.591852	0.240224	0.664968	0.139314	0.874037	0.174758	0.686001	0.141965
1516	CDKL5_Y171_R175S_YF	CDKL5	Y171	R175S	YF	ANFTEYVATSW	1	0.544617	0.250241	0.809406	0.222416	0.756791	0.175143	0.558102	0.350862
1517	CDKL5_Y171_YF	CDKL5	Y171		YF	ANFTEYVATRW	1	0.522972	0.0617376	0.595286	0.316687	0.805743	0.0871902	0.472046	0.227573
1518	CDKL5_Y177	CDKL5	Y177			VATRWYRSPEL	1	0.522503	0.205535	0.604075	0.175674	1.06725	0.179324	0.820684	0.303481
1519	CDKL5_Y177_L182P	CDKL5	Y177	L182P		VATRWYRSPEP	1	0.421751	0.071387	0.628529	0.407645	0.79555	0.111047	0.605957	0.321547
1520	CDKL5_Y177_P180L	CDKL5	Y177	P180L		VATRWYRSLEL	1	0.373492	0.151861	0.550602	0.0981844	0.716746	0.081467	0.402469	0.210794
1521	CDKL5_Y177_R175S	CDKL5	Y177	R175S		VATSWYRSPEL	1	0.549172	0.231376	0.770088	0.109264	0.827272	0.0585755	1.80978	0.270493
1522	CDKL5_Y177_R178P	CDKL5	Y177	R178P		VATRWYPSPEL	1	0.907209	0.64556	0.794419	0.669252	1.22781	0.665589	0.544664	0.2613
1523	CDKL5_Y177_R178Q	CDKL5	Y177	R178Q		VATRWYQSPEL	1	1.16307	0.220306	0.955424	0.318525	0.983277	0.287852	1.25741	0.148987
1524	CDKL5_Y177_R178W	CDKL5	Y177	R178W		VATRWYWSPEL	1	1.93889	0.432917	0.730977	0.298411	0.971269	0.162828	2.98037	1.55218
1525	CDKL5_Y286	CDKL5	Y286			DPADRYLTEQC	1	0.506685	0.256386	0.747087	0.415911	0.918378	0.268899	0.563414	0.294579
1526	CDKL5_Y286_C291Y	CDKL5	Y286	C291Y		DPADRYLTEQY	2	0.429042	0.131319	0.943531	0.295791	1.00527	0.191499	0.546179	0.241035
1527	CDKL5_Y286_C291Y_YF	CDKL5	Y286	C291Y	YF	DPADRYLTEQF	1	0.570844	0.259319	0.617621	0.4901	0.88884	0.390903	0.434845	0.287104
1528	CDKL5_Y286_T288I	CDKL5	Y286	T288I		DPADRYLIEQC	1	0.543989	0.322111	0.670148	0.394325	0.880199	0.174804	0.617951	0.334178
1529	CDKN1B_Y74	CDKN1B	Y74			PLEGKYEWQEV	1	3.88517	0.390487	0.515834	0.176392	0.675062	0.184786	1.82249	0.495397
1530	CDKN1B_Y74_P69L	CDKN1B	Y74	P69L		LLEGKYEWQEV	1	3.23935	0.405347	0.46433	0.315469	0.800888	0.130486	2.18687	1.03947
1531	CDKN2A_Y44	CDKN2A	Y44			NAPNSYGRRPI	1	0.39214	0.17715	0.799335	0.276796	0.725665	0.336605	0.339611	0.188398
1532	CDKN2A_Y44_I49S	CDKN2A	Y44	I49S		NAPNSYGRRPS	1	0.746716	0.422409	0.532545	0.240399	0.773954	0.26149	0.319318	0.198416
1533	CDKN2A_Y44_I49T	CDKN2A	Y44	I49T		NAPNSYGRRPT	1	0.56711	0.0752021	0.615472	0.285703	0.59858	0.336946	0.335619	0.232352
1534	CDKN2A_Y44_P48L	CDKN2A	Y44	P48L		NAPNSYGRRLI	1	0.331772	0.190496	0.320434	0.126777	0.897451	0.25969	0.318948	0.126905
1535	CEACAM7_Y236	CEACAM7	Y236			TLNVRYESVQA	1	7.17617	1.1493	1.52133	0.356237	0.899975	0.0217214	1.17434	0.444957
1536	CEACAM7_Y236_Y236H	CEACAM7	Y236	Y236H		TLNVRHESVQA	0	0.579199	0.219978	0.714128	0.263738	0.977866	0.294979	0.407151	0.295392
1537	CEFIP_Y1332	CEFIP	Y1332			ALAAPYVLYPG	2	0.70043	0.135758	0.601886	0.0585975	0.747173	0.300027	4.78601	0.90615
1538	CEFIP_Y1332_G1337S	CEFIP	Y1332	G1337S		ALAAPYVLYPS	2	0.761681	0.358933	0.803966	0.0713519	1.03121	0.265431	5.69035	1.65763
1539	CEFIP_Y1332_G1337S_YF	CEFIP	Y1332	G1337S	YF	ALAAPYVLFPS	1	4.34332	1.32964	0.816293	0.254002	0.968367	0.0875431	3.93777	1.52584
1540	CEFIP_Y1332_YF	CEFIP	Y1332		YF	ALAAPYVLFPG	1	3.49348	1.66513	1.20612	0.27297	0.839019	0.240155	4.10925	2.40516
1541	CEFIP_Y210	CEFIP	Y210			THQNSYQPGRK	1	0.672933	0.227891	0.980161	0.13613	0.903479	0.158001	0.473252	0.26879
1542	CEFIP_Y210_N208K	CEFIP	Y210	N208K		THQKSYQPGRK	1	0.514397	0.235348	0.40762	0.394278	0.88666	0.284526	0.340009	0.193825
1543	CEMIP2_Y1015	CEMIP2	Y1015			ITRDEYPSNPM	1	0.474779	0.136191	0.628841	0.208212	0.716561	0.265259	0.406716	0.263199
1544	CEMIP2_Y1015_I1010V	CEMIP2	Y1015	I1010V		VTRDEYPSNPM	1	0.563661	0.292142	0.782634	0.0885166	0.670293	0.125875	0.465372	0.240327
1545	CENPF_Y1920	CENPF	Y1920			EHEALYLEADL	1	0.570476	0.300584	0.559868	0.200188	0.844867	0.230951	0.482229	0.229071
1546	CENPF_Y1920_E1915A	CENPF	Y1920	E1915A		AHEALYLEADL	1	0.39929	0.179473	0.385911	0.199615	0.576786	0.200236	0.470604	0.190515
1547	CENPF_Y700	CENPF	Y700			TQKLAYMELQQ	1	0.930518	0.189587	1.1655	0.621852	0.933516	0.27743	0.849344	0.199935
1548	CENPF_Y700_M701V	CENPF	Y700	M701V		TQKLAYVELQQ	1	0.931603	0.249394	1.74845	0.545702	0.874424	0.375417	0.766331	0.0980589
1549	CEP120_Y884	CEP120	Y884			QMRLRYLAAEE	1	0.445339	0.193626	0.981916	0.10629	0.663586	0.311639	0.527535	0.155051
1550	CEP120_Y884_Q879H	CEP120	Y884	Q879H		HMRLRYLAAEE	1	1.18148	0.929269	1.3875	0.105379	1.1425	0.413887	1.07416	0.231894
1551	CEP152_Y268	CEP152	Y268			ERQIRYLNHQL	1	0.512136	0.186266	0.683109	0.185714	0.842209	0.19579	0.414884	0.23545
1552	CEP152_Y268_Q265P	CEP152	Y268	Q265P		ERPIRYLNHQL	1	0.487543	0.0922912	0.627155	0.282482	1.18339	0.45986	0.404043	0.160625
1553	CEP43_Y267	CEP43	Y267			KPEKTYGLRKE	1	0.82279	0.186167	0.999395	0.178074	1.10392	0.415646	0.699374	0.33295
1554	CEP43_Y267_K271N	CEP43	Y267	K271N		KPEKTYGLRNE	1	0.533573	0.126104	0.757921	0.146643	0.593828	0.0661701	0.541148	0.159622
1555	CERT1_Y143	CERT1	Y143			SGASGYSATST	1	0.485793	0.224132	0.578319	0.0321015	0.703559	0.185517	0.448163	0.251632
1556	CERT1_Y143_S138C	CERT1	Y143	S138C		CGASGYSATST	1	0.555959	0.0666689	0.756037	0.151002	0.741304	0.242302	0.640185	0.0755537
1557	CFAP221_Y798	CFAP221	Y798			FPMLNYKDIRK	1	0.516366	0.115957	0.635189	0.132159	0.976121	0.603715	0.460526	0.272828
1558	CFAP221_Y798_M795I	CFAP221	Y798	M795I		FPILNYKDIRK	1	0.446523	0.0536234	0.695704	0.187182	0.760425	0.0293241	0.482315	0.164761
1559	CFAP410_Y68	CFAP410	Y68			RLSELYLRRNR	1	0.344314	0.135144	0.584973	0.234313	0.736308	0.101748	0.239214	0.111202
1560	CFAP410_Y68_R73P	CFAP410	Y68	R73P		RLSELYLRRNP	1	0.352137	0.303609	0.302809	0.222254	0.63333	0.0980959	0.474977	0.28433
1561	CFAP45_Y289	CFAP45	Y289			EQMLEYMEQLQ	1	0.356669	0.174869	0.499688	0.138253	0.799411	0.281032	0.245408	0.139119
1562	CFAP45_Y289_E291G	CFAP45	Y289	E291G		EQMLEYMGQLQ	1	0.420439	0.142587	0.552743	0.273857	0.793997	0.0960361	0.542125	0.00706619
1563	CFAP47_Y557	CFAP47	Y557			AKRKNYAPVAM	1	1.04802	0.759192	1.26325	0.474737	1.11489	0.321087	0.632979	0.235129
1564	CFAP47_Y557_A561T	CFAP47	Y557	A561T		AKRKNYAPVTM	1	1.18939	0.663446	1.15847	0.345383	1.02951	0.260403	0.581026	0.232256
1565	CFAP58_Y501	CFAP58	Y501			SDRNLYSKNLV	1	0.423148	0.21559	0.81101	0.14104	0.822909	0.0457487	0.767562	0.11796
1566	CFAP58_Y501_S496T	CFAP58	Y501	S496T		TDRNLYSKNLV	1	0.407583	0.202703	0.559063	0.068685	0.768662	0.193619	0.709028	0.218856
1567	CFH_Y1008	CFH	Y1008			EKKDVYKAGEQ	1	0.596227	0.194334	0.549109	0.21357	0.953567	0.0540427	0.451634	0.258838
1568	CFH_Y1008_A1010T	CFH	Y1008	A1010T		EKKDVYKTGEQ	1	0.375968	0.0385272	0.493778	0.177769	0.771467	0.160499	0.296274	0.187221
1569	CFH_Y1008_V1007I	CFH	Y1008	V1007I		EKKDIYKAGEQ	1	0.364861	0.162898	0.648077	0.171055	0.825681	0.179119	0.368458	0.218944
1570	CFH_Y1008_V1007L	CFH	Y1008	V1007L		EKKDLYKAGEQ	1	0.459804	0.097339	0.65531	0.162353	0.794128	0.0798141	0.443374	0.252916
1571	CFI_Y421	CFI	Y421			IFHENYNAGTY	2	0.624591	0.151503	0.676298	0.167447	0.788463	0.107019	2.3228	0.994019
1572	CFI_Y421_H418L	CFI	Y421	H418L		IFLENYNAGTY	2	0.667776	0.16815	0.777281	0.511745	0.936821	0.214816	2.64487	0.938492
1573	CFI_Y421_H418L_YF	CFI	Y421	H418L	YF	IFLENYNAGTF	1	0.527423	0.0750811	0.7861	0.364582	0.760764	0.100004	0.899228	0.228827
1574	CFI_Y421_I416L	CFI	Y421	I416L		LFHENYNAGTY	2	0.703635	0.201113	0.817809	0.0770219	0.89991	0.483382	2.46544	1.0066
1575	CFI_Y421_I416L_YF	CFI	Y421	I416L	YF	LFHENYNAGTF	1	0.538838	0.180712	0.855919	0.371834	0.720287	0.412823	1.17961	0.145374
1576	CFI_Y421_YF	CFI	Y421		YF	IFHENYNAGTF	1	0.478813	0.123648	0.684454	0.12182	0.868989	0.203812	1.01725	0.108025
1577	CFTR_Y1014	CFTR	Y1014			AVLQPYIFVAT	1	0.328801	0.0476032	0.544619	0.0522146	0.649887	0.183235	0.54818	0.0924003
1578	CFTR_Y1014_P1013L	CFTR	Y1014	P1013L		AVLQLYIFVAT	1	0.439445	0.199939	0.701384	0.143691	1.00052	0.149137	0.538805	0.268276
1579	CFTR_Y512	CFTR	Y512			IFGVSYDEYRY	3	1.36298	0.639874	0.896376	0.158801	0.776364	0.178896	3.56963	2.16225
1580	CFTR_Y512_D513G	CFTR	Y512	D513G		IFGVSYGEYRY	3	0.932592	0.315362	1.10445	0.186163	1.04719	0.0793259	3.56454	1.86484
1581	CFTR_Y512_D513G_YF	CFTR	Y512	D513G	YF	IFGVSYGEFRF	1	0.705428	0.165223	1.08066	0.0561212	1.06121	0.127745	0.801965	0.227463
1582	CFTR_Y512_F508C	CFTR	Y512	F508C		ICGVSYDEYRY	3	1.76774	1.21385	0.681486	0.225744	0.750571	0.254328	1.73297	1.32938
1583	CFTR_Y512_F508C_YF	CFTR	Y512	F508C	YF	ICGVSYDEFRF	1	0.846661	0.372907	0.664487	0.0450651	0.838156	0.242382	0.948612	0.284249
1584	CFTR_Y512_I507V	CFTR	Y512	I507V		VFGVSYDEYRY	3	1.38407	0.305945	0.719966	0.215774	0.780563	0.172636	3.23572	0.954075
1585	CFTR_Y512_I507V_YF	CFTR	Y512	I507V	YF	VFGVSYDEFRF	1	0.859048	0.161624	1.09451	0.409084	0.983738	0.197647	1.17318	0.712816
1586	CFTR_Y512_YF	CFTR	Y512		YF	IFGVSYDEFRF	1	0.897491	0.365931	0.684243	0.329888	0.990778	0.625288	0.836023	0.305877
1587	CFTR_Y515	CFTR	Y515			VSYDEYRYRSV	3	1.44622	0.186266	0.822301	0.184484	0.977881	0.1178	2.726	0.790492
1588	CFTR_Y515_D513G	CFTR	Y515	D513G		VSYGEYRYRSV	3	0.451138	0.0354977	0.368655	0.0974557	0.52891	0.0726371	1.28716	0.765341
1589	CFTR_Y515_D513G_YF	CFTR	Y515	D513G	YF	VSFGEYRFRSV	1	0.527959	0.201542	0.899829	0.548111	0.791693	0.426783	1.05398	0.296094
1590	CFTR_Y515_V520F	CFTR	Y515	V520F		VSYDEYRYRSF	3	0.675762	0.0985844	0.717359	0.117536	0.719898	0.0829403	1.90541	0.349028
1591	CFTR_Y515_V520F_YF	CFTR	Y515	V520F	YF	VSFDEYRFRSF	1	0.393498	0.10734	0.714704	0.277304	0.834148	0.225268	0.763968	0.0539877
1592	CFTR_Y515_YF	CFTR	Y515		YF	VSFDEYRFRSV	1	0.477153	0.11833	0.549806	0.100666	0.776054	0.237089	1.02662	0.135434
1593	CFTR_Y517	CFTR	Y517			YDEYRYRSVIK	3	1.24636	0.240007	0.606367	0.185817	0.787781	0.120287	2.47158	1.48956
1594	CFTR_Y517_D513G	CFTR	Y517	D513G		YGEYRYRSVIK	3	0.816794	0.3781	0.818558	0.205028	0.769052	0.127323	1.26268	0.329647
1595	CFTR_Y517_D513G_YF	CFTR	Y517	D513G	YF	FGEFRYRSVIK	1	0.423469	0.130341	0.426388	0.126536	0.56712	0.117297	0.296973	0.121816
1596	CFTR_Y517_V520F	CFTR	Y517	V520F		YDEYRYRSFIK	3	1.21153	0.423388	0.84888	0.121375	0.900603	0.313003	2.82928	1.59896
1597	CFTR_Y517_V520F_YF	CFTR	Y517	V520F	YF	FDEFRYRSFIK	1	0.414174	0.112597	0.409673	0.171778	0.701599	0.196796	0.407173	0.171789
1598	CFTR_Y517_YF	CFTR	Y517		YF	FDEFRYRSVIK	1	0.444071	0.128073	0.526568	0.115029	0.812223	0.213566	0.424354	0.205082
1599	CHAC2_Y78	CHAC2	Y78			EEVKAYLDFRE	1	0.329628	0.0759867	0.555754	0.227322	0.651227	0.157916	0.685984	0.0719845
1600	CHAC2_Y78_R82G	CHAC2	Y78	R82G		EEVKAYLDFGE	1	0.382554	0.183061	0.590247	0.216789	0.730353	0.137135	0.685149	0.113376
1601	CHD7_Y1217	CHD7	Y1217			NIQKKYYRAIL	2	0.898293	0.440744	1.08579	0.732964	1.0868	0.225476	0.630961	0.194988
1602	CHD7_Y1217_Q1214R	CHD7	Y1217	Q1214R		NIRKKYYRAIL	2	0.3675	0.0132481	0.425713	0.0834777	0.599437	0.206534	0.265839	0.207118
1603	CHD7_Y1217_Q1214R_YF	CHD7	Y1217	Q1214R	YF	NIRKKYFRAIL	1	0.356239	0.190607	0.544231	0.516585	0.764374	0.207485	0.380717	0.235686
1604	CHD7_Y1217_YF	CHD7	Y1217		YF	NIQKKYFRAIL	1	0.565567	0.122025	0.838328	0.25679	0.960073	0.0668712	0.577186	0.383794
1605	CHD7_Y1218	CHD7	Y1218			IQKKYYRAILE	2	0.63711	0.235707	0.636048	0.220483	0.976286	0.303734	0.724025	0.389303
1606	CHD7_Y1218_Q1214R	CHD7	Y1218	Q1214R		IRKKYYRAILE	2	0.394184	0.0887295	0.724783	0.25239	0.595946	0.0203268	0.304081	0.171322
1607	CHD7_Y1218_Q1214R_YF	CHD7	Y1218	Q1214R	YF	IRKKFYRAILE	1	0.432764	0.184242	0.457942	0.0872793	0.619026	0.280874	0.221073	0.100215
1608	CHD7_Y1218_YF	CHD7	Y1218		YF	IQKKFYRAILE	1	0.684888	0.0951613	0.698743	0.574538	0.768746	0.0882676	0.554127	0.360082
1609	CHD7_Y1256	CHD7	Y1256			CCNHPYLINGA	1	0.540865	0.221835	0.703597	0.213396	0.804373	0.43569	0.411668	0.248987
1610	CHD7_Y1256_C1251R	CHD7	Y1256	C1251R		RCNHPYLINGA	1	0.732253	0.0731454	0.692874	0.330931	0.931191	0.0933745	1.30785	0.319669
1611	CHD7_Y1256_L1257R	CHD7	Y1256	L1257R		CCNHPYRINGA	1	0.50979	0.253519	0.536512	0.137685	0.860545	0.267756	0.710291	0.231341
1612	CHD7_Y75	CHD7	Y75			DHYNQYEQQKM	2	0.472231	0.22632	0.823913	0.283755	0.559744	0.101232	1.35267	0.35819
1613	CHD7_Y75_Y72C	CHD7	Y75	Y72C		DHCNQYEQQKM	1	0.824608	0.14145	0.879236	0.182729	0.970668	0.106851	0.925199	0.112607
1614	CHD7_Y75_YF	CHD7	Y75		YF	DHFNQYEQQKM	1	0.501263	0.041762	0.681673	0.0452677	0.751503	0.0834168	0.852851	0.237978
1615	CHEK2_Y390	CHEK2	Y390			CGTPTYLAPEV	1	0.582249	0.214838	0.785448	0.150451	0.878072	0.18461	0.787256	0.235618
1616	CHEK2_Y390_Y390C	CHEK2	Y390	Y390C		CGTPTCLAPEV	0	0.607548	0.216979	0.9324	0.183876	0.904033	0.175888	0.501407	0.192691
1617	CHGA_Y381	CHGA	Y381			FRARAYGFRGP	1	0.464707	0.135836	0.475925	0.0564781	0.705356	0.257388	0.315664	0.187339
1618	CHGA_Y381_G382S	CHGA	Y381	G382S		FRARAYSFRGP	1	0.572898	0.273032	0.362764	0.069578	0.596813	0.244279	0.325095	0.199877
1619	CHGB_Y173	CHGB	Y173			EEGENYQKGER	1	0.436234	0.168913	0.602294	0.355645	0.816275	0.049436	0.47283	0.292273
1620	CHGB_Y173_R178Q	CHGB	Y173	R178Q		EEGENYQKGEQ	1	0.471796	0.227468	0.473138	0.279762	0.876405	0.0835973	0.447683	0.261408
1621	CHKB_Y381	CHKB	Y381			SRFQFYFQQKG	1	0.472778	0.0848963	0.727803	0.0964012	0.692205	0.142888	0.441856	0.179596
1622	CHKB_Y381_R377L	CHKB	Y381	R377L		SLFQFYFQQKG	1	1.02191	0.296735	1.37295	0.241482	1.57553	0.156239	1.17138	0.16457
1623	CHL1_Y291	CHL1	Y291			ETKENYGKTLK	1	0.663943	0.198469	0.562053	0.112962	1.15747	0.348732	0.4834	0.324625
1624	CHL1_Y291_T287A	CHL1	Y291	T287A		EAKENYGKTLK	1	0.431706	0.170975	0.502766	0.243708	0.75442	0.172957	0.467596	0.227526
1625	CHN1_Y143	CHN1	Y143			TINPIYEHVGY	2	0.573748	0.184057	0.58187	0.224058	0.761999	0.0344404	0.453127	0.251499
1626	CHN1_Y143_Y143H	CHN1	Y143	Y143H		TINPIHEHVGY	1	0.580432	0.261825	0.870162	0.324708	0.82279	0.21087	0.381194	0.264906
1627	CHN1_Y143_Y143H_YF	CHN1	Y143	Y143H	YF	TINPIHEHVGF	0	0.51861	0.0957424	0.757416	0.266888	0.813167	0.123242	0.36766	0.270466
1628	CHN1_Y143_YF	CHN1	Y143		YF	TINPIYEHVGF	1	0.518098	0.109883	0.690026	0.111655	0.830046	0.0927317	0.419704	0.158243
1629	CHN1_Y148	CHN1	Y148			YEHVGYTTLNR	2	16.4834	3.59233	19.4086	11.904	0.904	0.171499	3.05087	0.63585
1630	CHN1_Y148_Y143H	CHN1	Y148	Y143H		HEHVGYTTLNR	1	3.47237	0.787652	61.3567	84.3788	0.880029	0.0779924	1.55203	0.348421
1631	CHN1_Y148_YF	CHN1	Y148		YF	FEHVGYTTLNR	1	5.21277	0.1814	18.7852	11.4925	0.9166	0.0631414	2.50339	0.744991
1632	CHP2_Y123	CHP2	Y123			YAFQLYDLDRD	2	1.58381	0.172616	2.55188	0.455663	0.878854	0.0563216	4.47678	2.07281
1633	CHP2_Y123_R127P	CHP2	Y123	R127P		YAFQLYDLDPD	2	1.28065	0.283436	1.70629	0.398452	0.986014	0.230494	3.04465	1.09506
1634	CHP2_Y123_R127P_YF	CHP2	Y123	R127P	YF	FAFQLYDLDPD	1	0.98159	0.358532	0.999071	0.0952679	1.01739	0.343337	0.679653	0.330302
1635	CHP2_Y123_YF	CHP2	Y123		YF	FAFQLYDLDRD	1	0.92268	0.11207	0.88452	0.200178	0.990635	0.199826	0.985361	0.0395987
1636	CHRND_Y38	CHRND	Y38			FQEKGYNKELR	1	0.485388	0.188788	0.881569	0.0632092	0.814064	0.22019	0.546045	0.272734
1637	CHRND_Y38_L42P	CHRND	Y38	L42P		FQEKGYNKEPR	1	0.670194	0.226355	0.980559	0.0705698	1.00173	0.216219	0.574279	0.286616
1638	CHST4_Y359	CHST4	Y359			MNLLGYRHVRS	1	0.544508	0.216443	0.747724	0.171717	0.85531	0.163961	0.404008	0.151466
1639	CHST4_Y359_H361Q	CHST4	Y359	H361Q		MNLLGYRQVRS	1	0.515391	0.265498	0.480628	0.045085	0.685682	0.185339	0.348982	0.217304
1640	CHST6_Y168	CHST6	Y168			EACRSYSHVVL	1	2.23749	0.115966	2.20268	0.380796	0.957861	0.165456	0.694027	0.340519
1641	CHST6_Y168_R166P	CHST6	Y168	R166P		EACPSYSHVVL	1	1.52208	0.511729	1.74475	0.324681	0.99985	0.0570651	0.762857	0.198632
1642	CHST6_Y358	CHST6	Y358			LQLLGYRPVYS	2	0.782789	0.0826094	0.962431	0.249289	1.02053	0.252147	3.1971	1.17177
1643	CHST6_Y358_Y358D	CHST6	Y358	Y358D		LQLLGDRPVYS	1	0.335473	0.0227174	0.791902	0.200486	0.771539	0.158371	1.127	0.238693
1644	CHST6_Y358_Y358D_YF	CHST6	Y358	Y358D	YF	LQLLGDRPVFS	0	0.532028	0.296028	0.762106	0.0742582	0.748709	0.21595	0.327991	0.194405
1645	CHST6_Y358_Y358H	CHST6	Y358	Y358H		LQLLGHRPVYS	1	0.732762	0.0324449	0.934725	0.248777	1.2161	0.125147	1.31924	0.27802
1646	CHST6_Y358_Y358H_YF	CHST6	Y358	Y358H	YF	LQLLGHRPVFS	0	0.54383	0.0466876	0.923093	0.365258	0.911673	0.324695	0.373423	0.290459
1647	CHST6_Y358_YF	CHST6	Y358		YF	LQLLGYRPVFS	1	0.680242	0.181718	0.626269	0.425974	0.806395	0.398346	0.531356	0.340194
1648	CHST6_Y362	CHST6	Y362			GYRPVYSEDEQ	2	0.691765	0.148223	0.668963	0.318998	0.921075	0.306064	2.00681	1.28811
1649	CHST6_Y362_Y358D	CHST6	Y362	Y358D		GDRPVYSEDEQ	1	0.819913	0.349661	0.638704	0.332862	0.992087	0.189734	0.727536	0.0651902
1650	CHST6_Y362_Y358H	CHST6	Y362	Y358H		GHRPVYSEDEQ	1	0.641355	0.159046	0.735602	0.0372579	1.10545	0.284048	0.852222	0.113516
1651	CHST6_Y362_YF	CHST6	Y362		YF	GFRPVYSEDEQ	1	0.64503	0.175207	0.730436	0.40178	0.903861	0.0165931	1.62819	0.893855
1652	CHST8_Y251	CHST8	Y251			HRLSTYTKMLF	1	1.98199	0.294736	1.86809	0.512498	1.70402	0.528085	1.51826	0.598575
1653	CHST8_Y251_R247H	CHST8	Y251	R247H		HHLSTYTKMLF	1	2.54388	0.38305	3.8751	2.11101	1.11239	0.218051	0.725418	0.231806
1654	CKAP5_Y1854	CKAP5	Y1854			GLAELYEYKKK	2	0.671339	0.404866	1.30551	0.358128	1.25621	0.588842	0.790155	0.510704
1655	CKAP5_Y1854_K1857Q	CKAP5	Y1854	K1857Q		GLAELYEYQKK	2	0.508793	0.0797023	0.696959	0.166767	0.670962	0.0566893	0.795328	0.0848001
1656	CKAP5_Y1854_K1857Q_YF	CKAP5	Y1854	K1857Q	YF	GLAELYEFQKK	1	0.795409	0.288393	0.473373	0.248715	0.665686	0.131343	0.517803	0.286481
1657	CKAP5_Y1854_YF	CKAP5	Y1854		YF	GLAELYEFKKK	1	0.533252	0.214687	0.863666	0.102211	2.19769	2.60769	0.58216	0.300457
1658	CKAP5_Y1860	CKAP5	Y1860			EYKKKYSDADI	2	0.435409	0.154345	0.614163	0.326781	0.819064	0.369125	0.543949	0.263246
1659	CKAP5_Y1860_K1857Q	CKAP5	Y1860	K1857Q		EYQKKYSDADI	2	0.473284	0.15995	0.807626	0.492301	1.00042	0.469895	0.403512	0.202633
1660	CKAP5_Y1860_K1857Q_YF	CKAP5	Y1860	K1857Q	YF	EFQKKYSDADI	1	0.458798	0.237727	0.589543	0.331621	0.771937	0.250036	0.415214	0.26853
1661	CKAP5_Y1860_YF	CKAP5	Y1860		YF	EFKKKYSDADI	1	0.487264	0.148184	0.61629	0.107817	0.882653	0.20177	0.47868	0.333102
1662	CKB_Y173	CKB	Y173			DLAGRYYALKS	2	1.4691	0.16601	0.721573	0.516488	0.823892	0.269837	1.55993	0.266178
1663	CKB_Y173_K177R	CKB	Y173	K177R		DLAGRYYALRS	2	1.87033	0.459812	0.899603	0.551363	0.774508	0.238283	2.63859	0.797104
1664	CKB_Y173_K177R_YF	CKB	Y173	K177R	YF	DLAGRYFALRS	1	0.737632	0.0115273	0.628328	0.132748	0.904973	0.266841	1.46425	0.0729028
1665	CKB_Y173_YF	CKB	Y173		YF	DLAGRYFALKS	1	0.584568	0.00950985	0.68776	0.0675419	1.38001	0.931942	0.980004	0.330527
1666	CKB_Y174	CKB	Y174			LAGRYYALKSM	2	1.66733	0.387763	2.13864	0.629074	1.21276	0.200074	1.7838	0.294546
1667	CKB_Y174_K177R	CKB	Y174	K177R		LAGRYYALRSM	2	1.72889	0.271038	2.85793	0.378284	1.37781	0.270677	1.96351	0.600515
1668	CKB_Y174_K177R_YF	CKB	Y174	K177R	YF	LAGRFYALRSM	1	1.19712	0.309982	0.873641	0.266909	1.38253	0.664494	1.15443	0.487152
1669	CKB_Y174_YF	CKB	Y174		YF	LAGRFYALKSM	1	1.1178	0.445624	1.11015	0.286219	1.22908	0.237491	1.00332	0.15392
1670	CKM_Y125	CKM	Y125			DLDPNYVLSSR	1	0.528457	0.223677	0.750429	0.269367	0.764804	0.456579	0.526095	0.315075
1671	CKM_Y125_L127V	CKM	Y125	L127V		DLDPNYVVSSR	1	0.488153	0.0221866	0.786759	0.171007	0.799791	0.323343	0.395078	0.244336
1672	CLCA1_Y147	CLCA1	Y147			KKLAEYGPQGR	1	0.545533	0.0565611	0.631417	0.168093	0.901282	0.154084	0.6116	0.238335
1673	CLCA1_Y147_R152K	CLCA1	Y147	R152K		KKLAEYGPQGK	1	0.491396	0.198845	0.609002	0.188944	0.768769	0.123202	0.496652	0.178465
1674	CLCA1_Y661	CLCA1	Y661			GVYSRYFTTYD	3	1.06238	0.0691012	1.26784	0.578491	0.943719	0.103018	5.02155	1.93231
1675	CLCA1_Y661_Y661H	CLCA1	Y661	Y661H		GVYSRHFTTYD	2	0.477432	0.149737	0.713892	0.429224	0.712996	0.0665475	1.1077	0.118098
1676	CLCA1_Y661_Y661H_YF	CLCA1	Y661	Y661H	YF	GVFSRHFTTFD	0	1.78491	1.36408	0.612075	0.664371	0.6741	0.61254	0.327501	0.464116
1677	CLCA1_Y661_YF	CLCA1	Y661		YF	GVFSRYFTTFD	1	0.395293	0.124381	0.788692	0.262896	0.890612	0.174612	0.426078	0.212647
1678	CLCA1_Y665	CLCA1	Y665			RYFTTYDTNGR	2	0.556295	0.262947	1.24322	0.874236	0.777302	0.288729	1.82249	0.774504
1679	CLCA1_Y665_Y661H	CLCA1	Y665	Y661H		RHFTTYDTNGR	1	0.493542	0.167729	0.642425	0.680297	0.716435	0.140132	0.935009	0.193681
1680	CLCA1_Y665_YF	CLCA1	Y665		YF	RFFTTYDTNGR	1	0.532391	0.382081	1.67218	0.421068	0.825058	0.38847	1.73784	0.438124
1681	CLCN4_Y548	CLCN4	Y548			TGGLEYIVPLM	1	0.519558	0.0286228	0.674698	0.223342	0.869177	0.239181	0.462984	0.3079
1682	CLCN4_Y548_G544R	CLCN4	Y548	G544R		TRGLEYIVPLM	1	0.825079	0.546343	0.706976	0.14125	0.834578	0.153648	0.435395	0.246268
1683	CLCNKB_Y138	CLCNKB	Y138			VVLEDYLDIKN	1	0.497123	0.210553	0.785717	0.58919	0.747441	0.132037	0.400667	0.237204
1684	CLCNKB_Y138_N143H	CLCNKB	Y138	N143H		VVLEDYLDIKH	1	0.539997	0.117334	0.574648	0.418291	0.760119	0.313017	0.418712	0.181485
1685	CLCNKB_Y93	CLCNKB	Y93			SHLLRYLSWTV	1	0.553087	0.0799065	0.724006	0.0306537	0.899608	0.0888002	0.590785	0.198938
1686	CLCNKB_Y93_S88R	CLCNKB	Y93	S88R		RHLLRYLSWTV	1	1.01719	0.467229	1.05503	0.326795	1.55397	0.106357	0.896071	0.299553
1687	CLDN14_Y233	CLDN14	Y233			ATHSGYRLNDY	2	0.49046	0.173379	0.62271	0.129182	0.709304	0.0461308	1.09751	0.0482293
1688	CLDN14_Y233_G232R	CLDN14	Y233	G232R		ATHSRYRLNDY	2	0.681752	0.228392	0.562525	0.0421536	0.743747	0.117185	0.764309	0.178553
1689	CLDN14_Y233_G232R_YF	CLDN14	Y233	G232R	YF	ATHSRYRLNDF	1	0.674248	0.144812	0.825494	0.0967228	0.934861	0.135099	0.582396	0.269815
1690	CLDN14_Y233_YF	CLDN14	Y233		YF	ATHSGYRLNDF	1	0.420981	0.0811139	0.542209	0.363467	1.03956	0.204943	0.444398	0.182542
1691	CLDN7_Y195	CLDN7	Y195			ESKAGYRVPRS	1	0.543569	0.17438	0.698783	0.447928	0.829577	0.221314	0.574086	0.231855
1692	CLDN7_Y195_V197A	CLDN7	Y195	V197A		ESKAGYRAPRS	1	0.541964	0.0996609	0.739602	0.030075	1.04367	0.0380477	0.600065	0.291608
1693	CLEC12A_Y242	CLEC12A	Y242			YYHCTYKKRMI	3	1.1138	0.644039	0.966015	0.204455	1.24791	0.105973	1.09206	0.0916403
1694	CLEC12A_Y242_K244Q	CLEC12A	Y242	K244Q		YYHCTYKQRMI	3	1.41062	0.468901	0.953345	0.0770744	1.41261	0.235479	1.55823	0.16361
1695	CLEC12A_Y242_K244Q_YF	CLEC12A	Y242	K244Q	YF	FFHCTYKQRMI	1	0.902214	0.620181	1.0689	0.387864	1.26552	0.0563873	0.960525	0.187691
1696	CLEC12A_Y242_YF	CLEC12A	Y242		YF	FFHCTYKKRMI	1	0.944171	0.504025	1.15265	0.386676	1.2848	0.250098	0.920116	0.163457
1697	CLEC12B_Y7	CLEC12B	Y7			SEEVTYATLTF	1	0.481075	0.15102	2.52351	1.2204	0.84498	0.10729	0.45058	0.19195
1698	CLEC12B_Y7_T6N	CLEC12B	Y7	T6N		SEEVNYATLTF	1	0.391124	0.0245737	3.03405	0.928777	0.761708	0.125701	0.412142	0.17711
1699	CLIC5_Y111	CLIC5	Y111			SMEGLYSSTQD	1	0.541656	0.0633335	0.445647	0.362809	0.777082	0.397011	0.769708	0.154465
1700	CLIC5_Y111_T114A	CLIC5	Y111	T114A		SMEGLYSSAQD	1	0.732928	0.166597	0.595416	0.199309	0.582081	0.0851761	0.742898	0.144627
1701	CLIP2_Y972	CLIP2	Y972			SDQRRYSLIDR	1	3.35118	0.537951	0.860763	0.194707	0.832586	0.250489	0.458776	0.235837
1702	CLIP2_Y972_R977P	CLIP2	Y972	R977P		SDQRRYSLIDP	1	15.8851	2.49514	3.81605	1.05435	0.888767	0.124758	1.00503	0.387997
1703	CLK1_Y305	CLK1	Y305			DYTEAYNPKIK	2	1.43364	0.261788	0.583704	0.191895	0.813137	0.204865	0.710471	0.318004
1704	CLK1_Y305_P307S	CLK1	Y305	P307S		DYTEAYNSKIK	2	1.00457	0.299604	0.582139	0.354272	0.586654	0.199878	0.695758	0.118927
1705	CLK1_Y305_P307S_YF	CLK1	Y305	P307S	YF	DFTEAYNSKIK	1	0.450292	0.118328	0.613041	0.150539	0.945019	0.246884	0.505905	0.10624
1706	CLK1_Y305_YF	CLK1	Y305		YF	DFTEAYNPKIK	1	0.53316	0.289461	1.11548	0.305426	0.947063	0.389631	0.60607	0.366708
1707	CLK1_Y56	CLK1	Y56			MCDSHYLESRS	1	0.674785	0.138835	0.718803	0.249057	1.0408	0.393508	0.715317	0.218457
1708	CLK1_Y56_S61F	CLK1	Y56	S61F		MCDSHYLESRF	1	0.659983	0.170471	0.85377	0.0592722	0.904636	0.19096	0.829764	0.20415
1709	CLNK_Y69	CLNK	Y69			HSDDDYDDPEL	1	0.607184	0.223102	0.828694	0.188949	0.779422	0.230577	0.492354	0.272829
1710	CLNK_Y69_S65G	CLNK	Y69	S65G		HGDDDYDDPEL	1	0.564554	0.133863	0.550837	0.117661	0.989731	0.118358	0.444075	0.152729
1711	CLNS1A_Y214	CLNS1A	Y214			DSIRDYEDGME	1	0.579338	0.31807	0.858614	0.366211	0.850521	0.122167	0.581185	0.40466
1712	CLNS1A_Y214_M218T	CLNS1A	Y214	M218T		DSIRDYEDGTE	1	0.577333	0.219938	0.670491	0.507463	0.828646	0.303309	0.550282	0.265706
1713	CLOCK_Y378	CLOCK	Y378			HTVVSYAEVRA	1	3.25418	0.862849	27.8738	26.3856	0.72144	0.0771732	0.702575	0.122929
1714	CLOCK_Y378_E380K	CLOCK	Y378	E380K		HTVVSYAKVRA	1	1.11901	0.452107	14.4985	8.143	1.10989	0.434114	0.80009	0.328507
1715	CLRN1_Y171	CLRN1	Y171			EKIANYKEGTY	2	0.43266	0.196404	0.641007	0.370608	0.802539	0.136188	0.598668	0.284058
1716	CLRN1_Y171_I168N	CLRN1	Y171	I168N		EKNANYKEGTY	2	0.537631	0.242259	0.774325	0.208407	0.962753	0.0527155	0.838677	0.178771
1717	CLRN1_Y171_I168N_YF	CLRN1	Y171	I168N	YF	EKNANYKEGTF	1	0.503488	0.157411	0.874114	0.304363	0.943721	0.0593404	0.456232	0.262978
1718	CLRN1_Y171_YF	CLRN1	Y171		YF	EKIANYKEGTF	1	0.443087	0.105997	0.553947	0.330402	0.90961	0.00846506	0.515065	0.288108
1719	CLSPN_Y887	CLSPN	Y887			NHRNQYQALKP	1	0.915193	0.39896	1.04956	0.313146	1.06163	0.0805218	0.720377	0.316575
1720	CLSPN_Y887_P892T	CLSPN	Y887	P892T		NHRNQYQALKT	1	1.16585	0.265528	1.00495	0.145935	0.994137	0.206166	0.85477	0.241246
1721	CLTCL1_Y1043	CLTCL1	Y1043			TRVMEYISRLD	1	0.654603	0.36318	0.930788	0.305568	1.034	0.224653	0.881171	0.263021
1722	CLTCL1_Y1043_R1046C	CLTCL1	Y1043	R1046C		TRVMEYISCLD	1	0.545215	0.19804	0.478043	0.317629	0.626124	0.114195	0.464324	0.142205
1723	CNBD1_Y70	CNBD1	Y70			TFMKQYPKVFL	1	0.55867	0.176261	0.810659	0.491365	0.835775	0.292347	0.576423	0.397899
1724	CNBD1_Y70_Q69K	CNBD1	Y70	Q69K		TFMKKYPKVFL	1	1.17249	0.778251	1.51568	0.588148	1.12287	0.197105	0.65913	0.187766
1725	CNGA2_Y395	CNGA2	Y395			DAVKHYMQFRK	1	0.461027	0.0996711	0.721862	0.495946	0.846936	0.148532	0.555473	0.293424
1726	CNGA2_Y395_R399Q	CNGA2	Y395	R399Q		DAVKHYMQFQK	1	0.619968	0.0400769	0.780618	0.243474	0.76779	0.115115	0.759986	0.12358
1727	CNGA3_Y168	CNGA3	Y168			PSSNLYYRWLT	2	0.815619	0.127129	1.59404	0.503362	1.31911	0.725447	5.22553	2.43803
1728	CNGA3_Y168_P163L	CNGA3	Y168	P163L		LSSNLYYRWLT	2	0.79528	0.247636	1.26847	0.441586	1.28673	0.35956	3.26951	2.02264
1729	CNGA3_Y168_P163L_YF	CNGA3	Y168	P163L	YF	LSSNLYFRWLT	1	0.53077	0.0712801	1.00949	0.390726	0.654509	0.293306	1.40276	0.583949
1730	CNGA3_Y168_W171C	CNGA3	Y168	W171C		PSSNLYYRCLT	2	0.48385	0.0537975	0.629031	0.122942	0.935689	0.23544	0.92207	0.102067
1731	CNGA3_Y168_W171C_YF	CNGA3	Y168	W171C	YF	PSSNLYFRCLT	1	0.378841	0.0794226	0.636408	0.0192565	0.749785	0.138514	0.716222	0.227845
1732	CNGA3_Y168_YF	CNGA3	Y168		YF	PSSNLYFRWLT	1	0.876246	0.369345	1.14753	0.58418	1.41023	0.414082	2.32204	0.631291
1733	CNGA3_Y169	CNGA3	Y169			SSNLYYRWLTA	2	0.545395	0.0846972	0.762797	0.233405	0.790505	0.355461	2.64283	0.231432
1734	CNGA3_Y169_W171C	CNGA3	Y169	W171C		SSNLYYRCLTA	2	0.42544	0.0896988	0.610627	0.131194	0.70234	0.315053	0.55682	0.145719
1735	CNGA3_Y169_W171C_YF	CNGA3	Y169	W171C	YF	SSNLFYRCLTA	1	0.398992	0.123798	0.517543	0.115398	0.807504	0.149782	0.518537	0.180451
1736	CNGA3_Y169_YF	CNGA3	Y169		YF	SSNLFYRWLTA	1	0.465881	0.321427	0.591301	0.261725	0.69248	0.323448	0.581687	0.291831
1737	CNGB3_Y200	CNGB3	Y200			MPLTEYLKRIK	1	0.488826	0.0748645	0.750374	0.479049	1.00559	0.0584878	0.503198	0.136856
1738	CNGB3_Y200_E199K	CNGB3	Y200	E199K		MPLTKYLKRIK	1	0.833572	0.357739	1.02782	0.171233	1.2667	0.31283	0.674026	0.433025
1739	CNGB3_Y200_R203Q	CNGB3	Y200	R203Q		MPLTEYLKQIK	1	0.363691	0.168561	0.650901	0.0779096	0.533825	0.126284	0.395128	0.129703
1740	CNKSR1_Y665	CNKSR1	Y665			QNRELYSEGLG	1	0.535747	0.0948657	0.616064	0.340409	0.73966	0.0745774	0.607243	0.072074
1741	CNKSR1_Y665_R662W	CNKSR1	Y665	R662W		QNWELYSEGLG	1	0.627824	0.26332	0.77052	0.269613	0.957532	0.3609	0.437698	0.156596
1742	CNNM3_Y456	CNNM3	Y456			DESEDYRDTVV	1	0.438636	0.0584771	0.587196	0.37686	0.900777	0.110388	0.445087	0.268824
1743	CNNM3_Y456_Y456C	CNNM3	Y456	Y456C		DESEDCRDTVV	0	0.672371	0.340859	0.887305	0.35518	0.970423	0.445883	0.685534	0.427463
1744	CNOT3_Y746	CNOT3	Y746			TFEYRYLEDRD	2	1.01193	0.234013	0.810324	0.23787	0.760448	0.0361342	1.50698	0.362736
1745	CNOT3_Y746_R750Q	CNOT3	Y746	R750Q		TFEYRYLEDQD	2	0.659845	0.203229	0.477788	0.276023	0.772132	0.468095	1.33342	0.790414
1746	CNOT3_Y746_R750Q_YF	CNOT3	Y746	R750Q	YF	TFEFRYLEDQD	1	0.602022	0.227504	0.86509	0.252421	0.908476	0.486021	0.587995	0.241455
1747	CNOT3_Y746_YF	CNOT3	Y746		YF	TFEFRYLEDRD	1	0.584344	0.0999262	0.959837	0.470921	1.0761	0.161913	0.520265	0.272096
1748	CNTN4_Y180	CNTN4	Y180			ETGNLYIAKVE	1	0.275573	0.158106	0.533484	0.127623	0.70547	0.199317	0.539859	0.0384764
1749	CNTN4_Y180_T176P	CNTN4	Y180	T176P		EPGNLYIAKVE	1	0.404803	0.267027	0.553378	0.297477	0.787722	0.123886	0.703137	0.0792781
1750	CNTN6_Y315	CNTN6	Y315			GQLIFYAPPEW	1	0.780587	0.165155	0.963073	0.0825074	1.09276	0.499116	2.48459	2.46518
1751	CNTN6_Y315_F314V	CNTN6	Y315	F314V		GQLIVYAPPEW	1	0.530236	0.194827	0.767366	0.188547	0.983968	0.298407	0.697269	0.343998
1752	COL10A1_Y623	COL10A1	Y623			GTPVMYTYDEY	3	2.67487	0.364539	0.842727	0.250894	0.953695	0.299585	3.58435	2.71123
1753	COL10A1_Y623_G618V	COL10A1	Y623	G618V		VTPVMYTYDEY	3	2.44275	0.689566	0.685364	0.249639	1.05165	0.173341	2.98968	1.55822
1754	COL10A1_Y623_G618V_YF	COL10A1	Y623	G618V	YF	VTPVMYTFDEF	1	0.772332	0.0601931	0.698237	0.353569	0.929644	0.184782	1.55886	1.0059
1755	COL10A1_Y623_YF	COL10A1	Y623		YF	GTPVMYTFDEF	1	0.662288	0.173908	0.692743	0.24661	0.889877	0.259549	1.7098	0.930069
1756	COL12A1_Y3043	COL12A1	Y3043			PGPPGYCDSSQ	1	0.603316	0.236507	0.691776	0.369288	0.979205	0.36644	0.725872	0.207185
1757	COL12A1_Y3043_Q3048H	COL12A1	Y3043	Q3048H		PGPPGYCDSSH	1	0.4976	0.226117	0.671345	0.32913	1.08455	0.393623	0.666289	0.115012
1758	COL22A1_Y37	COL22A1	Y37			CKSVHYDLVFL	1	0.986453	0.00961434	0.61308	0.133897	0.774557	0.196453	0.619493	0.204868
1759	COL22A1_Y37_V35I	COL22A1	Y37	V35I		CKSIHYDLVFL	1	1.05811	0.159248	0.573036	0.122113	0.736157	0.158657	0.632743	0.171884
1760	COL4A1_Y348	COL4A1	Y348			KGERGYPGTPG	1	0.482121	0.154681	0.770379	0.324186	0.831923	0.180103	0.521967	0.26795
1761	COL4A1_Y348_P352L	COL4A1	Y348	P352L		KGERGYPGTLG	1	0.420514	0.188577	0.537414	0.286635	0.872934	0.151008	0.473412	0.196382
1762	COL4A2_Y306	COL4A2	Y306			PGLRGYPGLSG	1	0.382857	0.117768	0.697899	0.270452	0.957695	0.0428435	0.466088	0.188287
1763	COL4A2_Y306_R304K	COL4A2	Y306	R304K		PGLKGYPGLSG	1	0.431189	0.179341	0.504426	0.236401	0.651991	0.0413545	0.421463	0.162694
1764	COL6A1_Y878	COL6A1	Y878			VAVVQYSGTGQ	1	0.450596	0.0336502	0.413259	0.0714669	0.767157	0.250073	0.715049	0.325937
1765	COL6A1_Y878_T881M	COL6A1	Y878	T881M		VAVVQYSGMGQ	1	0.603002	0.0191249	0.926531	0.135375	0.762672	0.0716043	1.23571	0.231004
1766	COL6A3_Y2827	COL6A3	Y2827			SENAFYLSPDI	1	0.475447	0.270253	0.698277	0.333354	0.739103	0.128859	0.445769	0.199387
1767	COL6A3_Y2827_D2831H	COL6A3	Y2827	D2831H		SENAFYLSPHI	1	0.461343	0.0394651	0.606188	0.196337	0.776279	0.146657	0.563574	0.0926194
1768	COL6A3_Y524	COL6A3	Y524			DGSALYTGSAL	1	0.382088	0.192951	0.64054	0.225245	0.712736	0.228759	0.866942	0.247075
1769	COL6A3_Y524_S521L	COL6A3	Y524	S521L		DGLALYTGSAL	1	0.360457	0.0458681	0.460434	0.110705	0.694982	0.09807	0.789346	0.15248
1770	COL6A3_Y543	COL6A3	Y543			TSSAGYRAAEG	1	0.484847	0.203389	0.653403	0.451248	0.903251	0.122385	0.372378	0.206611
1771	COL6A3_Y543_T538M	COL6A3	Y543	T538M		MSSAGYRAAEG	1	0.396355	0.141751	0.609134	0.0685225	0.788398	0.110149	0.441066	0.235452
1772	COL8A2_Y648	COL8A2	Y648			PATYTYDEYKK	3	1.48203	0.262088	0.799232	0.570342	0.55144	0.144219	2.09256	0.822614
1773	COL8A2_Y648_T645I	COL8A2	Y648	T645I		PAIYTYDEYKK	3	2.28499	0.711335	0.512954	0.356095	0.778277	0.246003	2.83451	1.89973
1774	COL8A2_Y648_T645I_YF	COL8A2	Y648	T645I	YF	PAIFTYDEFKK	1	0.509165	0.223009	0.888465	0.639619	0.828959	0.195803	0.99445	0.500586
1775	COL8A2_Y648_YF	COL8A2	Y648		YF	PATFTYDEFKK	1	0.790767	0.146397	0.529802	0.378698	1.03039	0.224717	0.787931	0.104623
1776	COX10_Y97	COX10	Y97			AKAEIYEMRPL	1	0.573374	0.0459312	0.622818	0.362928	0.894653	0.168407	0.71332	0.392721
1777	COX10_Y97_Y97C	COX10	Y97	Y97C		AKAEICEMRPL	0	0.678883	0.229023	0.798367	0.23726	1.01477	0.247065	0.600501	0.313635
1778	COX4I1_Y38	COX4I1	Y38			FSLPAYMDRRD	1	0.625838	0.0339806	0.719832	0.373782	0.772107	0.178342	0.502786	0.154475
1779	COX4I1_Y38_Y38F	COX4I1	Y38	Y38F		FSLPAFMDRRD	0	0.6387	0.250834	1.02962	0.243369	1.02365	0.468593	0.530576	0.353996
1780	COX7A2_Y44	COX7A2	Y44			DEIPLYLKGGV	1	0.453645	0.165146	0.715704	0.320218	0.830067	0.0952186	0.523786	0.206642
1781	COX7A2_Y44_E40D	COX7A2	Y44	E40D		DDIPLYLKGGV	1	0.478558	0.185749	0.662898	0.267285	0.861554	0.244204	0.751247	0.0964911
1782	CP_Y539	CP	Y539			CLAKMYYSAVD	2	3.42709	2.70044	0.901934	0.185142	0.942465	0.193451	1.6098	0.922641
1783	CP_Y539_D544E	CP	Y539	D544E		CLAKMYYSAVE	2	2.57373	1.98804	0.970691	0.373502	0.828057	0.167949	1.47184	0.859154
1784	CP_Y539_D544E_YF	CP	Y539	D544E	YF	CLAKMYFSAVE	1	0.621404	0.147475	0.833588	0.256347	1.08852	0.190888	0.884444	0.179134
1785	CP_Y539_YF	CP	Y539		YF	CLAKMYFSAVD	1	0.605662	0.177249	0.607652	0.126489	0.89459	0.296948	0.803351	0.212738
1786	CPO_Y278	CPO	Y278			KYGTNYRVGSS	2	0.835077	0.511442	1.23403	0.784268	1.01287	0.199223	0.68524	0.170906
1787	CPO_Y278_K273N	CPO	Y278	K273N		NYGTNYRVGSS	2	0.550245	0.270397	0.638666	0.285778	0.924286	0.300756	0.795832	0.223457
1788	CPO_Y278_K273N_YF	CPO	Y278	K273N	YF	NFGTNYRVGSS	1	0.417826	0.170848	0.634085	0.0990352	0.880385	0.0596826	0.596256	0.281529
1789	CPO_Y278_YF	CPO	Y278		YF	KFGTNYRVGSS	1	0.586131	0.0473254	0.914441	0.382769	1.23193	0.339942	0.778944	0.226618
1790	CPOX_Y429	CPOX	Y429			TARWEYMHSPS	1	0.687544	0.187643	0.777693	0.0987668	1.25277	0.338074	1.83709	0.501278
1791	CPOX_Y429_W427R	CPOX	Y429	W427R		TARREYMHSPS	1	0.647498	0.380862	0.647134	0.121461	0.858948	0.164428	0.398421	0.228607
1792	CPS1_Y1069	CPS1	Y1069			LAVPLYKNGVK	1	0.512133	0.0494962	0.707784	0.520336	1.11903	0.324689	0.475298	0.259376
1793	CPS1_Y1069_A1065E	CPS1	Y1069	A1065E		LEVPLYKNGVK	1	0.472109	0.260566	0.490972	0.260977	0.844605	0.26694	0.554359	0.159311
1794	CPS1_Y1450	CPS1	Y1450			FVHDNYVIRRT	1	0.416291	0.072006	0.517211	0.209773	0.654598	0.090983	0.642725	0.177557
1795	CPS1_Y1450_R1453Q	CPS1	Y1450	R1453Q		FVHDNYVIQRT	1	0.624428	0.342939	0.595986	0.0763676	0.971087	0.165652	0.750343	0.129819
1796	CPS1_Y1450_R1453W	CPS1	Y1450	R1453W		FVHDNYVIWRT	1	0.827219	0.0377927	0.846677	0.428949	1.11157	0.115406	0.649262	0.253407
1797	CPS1_Y1491	CPS1	Y1491			KSLFHYRQYSA	2	0.378942	0.170416	0.520933	0.322516	0.749327	0.0866466	0.463635	0.252197
1798	CPS1_Y1491_Y1491H	CPS1	Y1491	Y1491H		KSLFHHRQYSA	1	0.341303	0.125157	0.613178	0.421092	0.617613	0.159529	0.34078	0.211042
1799	CPS1_Y1491_Y1491H_YF	CPS1	Y1491	Y1491H	YF	KSLFHHRQFSA	0	0.520932	0.0792193	0.919614	0.21468	0.843343	0.129015	0.446698	0.293267
1800	CPS1_Y1491_YF	CPS1	Y1491		YF	KSLFHYRQFSA	1	0.394702	0.131499	0.601335	0.0304384	0.734166	0.25593	0.307284	0.202971
1801	CPS1_Y162	CPS1	Y162			KVPAIYGVDTR	1	0.465792	0.138569	0.706998	0.230001	0.840772	0.257539	0.842414	0.0416994
1802	CPS1_Y162_D165G	CPS1	Y162	D165G		KVPAIYGVGTR	1	0.69855	0.163848	0.615159	0.122761	0.948422	0.164248	0.688916	0.158304
1803	CPS1_Y309	CPS1	Y309			AGAKTYKMSMA	1	0.586229	0.192841	0.818925	0.0939336	0.68841	0.408693	0.426936	0.194608
1804	CPS1_Y309_A304V	CPS1	Y309	A304V		VGAKTYKMSMA	1	0.407623	0.0389052	0.421401	0.226208	0.725334	0.0764189	0.433876	0.1493
1805	CPS1_Y529	CPS1	Y529			GVLKEYGVKVL	1	0.408155	0.0931968	0.688277	0.204793	0.863312	0.244879	0.435722	0.173224
1806	CPS1_Y529_G530V	CPS1	Y529	G530V		GVLKEYVVKVL	1	0.47924	0.159429	0.747504	0.143266	0.948536	0.0737221	0.651337	0.299223
1807	CPS1_Y529_V531E	CPS1	Y529	V531E		GVLKEYGEKVL	1	0.426728	0.135775	0.767074	0.0384579	0.920529	0.0951169	0.478509	0.258879
1808	CPS1_Y529_V531G	CPS1	Y529	V531G		GVLKEYGGKVL	1	0.290347	0.0191375	0.559206	0.168341	0.963437	0.200762	0.447175	0.215279
1809	CPS1_Y590	CPS1	Y590			MIRSAYALGGL	1	0.459561	0.249924	0.688927	0.160759	0.715454	0.260746	0.796839	0.230712
1810	CPS1_Y590_A589T	CPS1	Y590	A589T		MIRSTYALGGL	1	0.43889	0.100459	0.626171	0.12361	0.698861	0.0405282	1.07901	0.26915
1811	CPS1_Y590_G593R	CPS1	Y590	G593R		MIRSAYALRGL	1	0.40848	0.10604	0.600471	0.195767	0.731	0.139568	0.501076	0.177424
1812	CPS1_Y590_R587C	CPS1	Y590	R587C		MICSAYALGGL	1	0.551544	0.0842522	0.50623	0.141005	0.764212	0.205487	0.821699	0.159535
1813	CPS1_Y590_R587H	CPS1	Y590	R587H		MIHSAYALGGL	1	0.716288	0.336133	0.639952	0.51508	0.882804	0.339114	2.6905	0.397643
1814	CPS1_Y590_R587L	CPS1	Y590	R587L		MILSAYALGGL	1	0.708288	0.0899261	0.794101	0.221293	0.83501	0.162078	1.63744	0.92725
1815	CPS1_Y634	CPS1	Y634			WKEIEYEVVRD	1	0.524367	0.182804	0.65047	0.0241102	0.697475	0.014829	0.44169	0.2322
1816	CPS1_Y634_I632R	CPS1	Y634	I632R		WKEREYEVVRD	1	6.04363	2.82695	0.669797	0.282319	0.954486	0.0962613	0.64639	0.402126
1817	CPS1_Y634_R638P	CPS1	Y634	R638P		WKEIEYEVVPD	1	0.47969	0.226098	0.861017	0.099752	0.836965	0.170263	0.404315	0.27872
1818	CPS1_Y768	CPS1	Y768			EPSLDYMVTKI	1	0.37934	0.164339	0.913841	0.198275	1.0485	0.493733	0.392623	0.277329
1819	CPS1_Y768_D767V	CPS1	Y768	D767V		EPSLVYMVTKI	1	0.481951	0.381609	0.530592	0.559559	0.769277	0.313426	0.47269	0.334358
1820	CPS1_Y872	CPS1	Y872			IEKLTYIDKWF	1	0.311001	0.0931784	0.465358	0.324448	0.723606	0.218639	3.21962	2.29672
1821	CPS1_Y872_K875E	CPS1	Y872	K875E		IEKLTYIDEWF	1	0.487577	0.187098	0.718917	0.129199	0.698472	0.139211	1.8544	0.861875
1822	CPS1_Y872_T871P	CPS1	Y872	T871P		IEKLPYIDKWF	1	0.641557	0.185171	0.679286	0.293261	0.782447	0.41006	1.49335	0.185403
1823	CPS1_Y879	CPS1	Y879			DKWFLYKMRDI	1	0.373274	0.0713879	0.661185	0.111563	0.838195	0.219395	0.447932	0.186948
1824	CPS1_Y879_K875E	CPS1	Y879	K875E		DEWFLYKMRDI	1	0.417092	0.0713865	0.829164	0.235553	0.652809	0.199726	3.67766	2.61261
1825	CPT1B_Y534	CPT1B	Y534			VIESSYQVAKA	1	0.537215	0.256724	0.78212	0.195469	0.905978	0.417266	0.585304	0.387414
1826	CPT1B_Y534_E531K	CPT1B	Y534	E531K		VIKSSYQVAKA	1	0.409913	0.11224	0.50344	0.251892	0.782673	0.13926	0.535286	0.300324
1827	CPT2_Y217	CPT2	Y217			LDMSQYFRLFN	1	0.668664	0.250517	2.01807	0.203927	1.2339	0.333126	1.68981	0.178896
1828	CPT2_Y217_D213G	CPT2	Y217	D213G		LGMSQYFRLFN	1	0.805121	0.409471	3.46434	0.154195	1.05824	0.0638277	2.26522	0.47395
1829	CPT2_Y217_M214T	CPT2	Y217	M214T		LDTSQYFRLFN	1	0.472186	0.129953	1.9758	0.427118	0.959724	0.0476377	1.41833	0.146645
1830	CPT2_Y508	CPT2	Y508			RPASVYTKRCS	1	0.621755	0.37502	0.643031	0.447485	1.09612	0.362895	0.551172	0.362316
1831	CPT2_Y508_P504L	CPT2	Y508	P504L		RLASVYTKRCS	1	0.610857	0.224356	0.863619	0.401412	0.868348	0.367857	0.679143	0.433404
1832	CPT2_Y508_R503C	CPT2	Y508	R503C		CPASVYTKRCS	1	0.583577	0.252597	0.76488	0.354138	0.98226	0.30007	0.639468	0.40652
1833	CPXM2_Y427	CPXM2	Y427			LNPDGYEKAYE	2	4.85886	1.6984	0.728715	0.475652	0.930084	0.152888	0.911833	0.515121
1834	CPXM2_Y427_E428K	CPXM2	Y427	E428K		LNPDGYKKAYE	2	0.443522	0.107	0.612815	0.110708	0.744062	0.082035	0.46292	0.278183
1835	CPXM2_Y427_E428K_YF	CPXM2	Y427	E428K	YF	LNPDGYKKAFE	1	0.488049	0.242386	0.578421	0.521992	0.944843	0.18021	0.406397	0.236457
1836	CPXM2_Y427_YF	CPXM2	Y427		YF	LNPDGYEKAFE	1	3.95409	1.3564	0.770105	0.579675	0.867826	0.15697	0.74852	0.505245
1837	CRACR2A_Y141	CRACR2A	Y141			HEEKVYLSRGD	1	0.366163	0.223956	0.495461	0.228125	0.812274	0.0887609	0.525246	0.278509
1838	CRACR2A_Y141_H136P	CRACR2A	Y141	H136P		PEEKVYLSRGD	1	0.457143	0.0960157	0.528562	0.458829	0.803557	0.250055	0.542595	0.220729
1839	CRB1_Y711	CRB1	Y711			NCLREYVAGRF	1	0.531361	0.146551	0.683715	0.150491	0.914744	0.345444	0.978323	0.133561
1840	CRB1_Y711_E710Q	CRB1	Y711	E710Q		NCLRQYVAGRF	1	0.298708	0.171781	0.571303	0.0818383	0.708777	0.263023	0.488398	0.323074
1841	CRB1_Y711_E710V	CRB1	Y711	E710V		NCLRVYVAGRF	1	0.67834	0.361478	0.970366	0.603772	1.10596	0.135005	0.812633	0.403509
1842	CRB1_Y760	CRB1	Y760			LENSTYQYIRV	2	1.71451	0.34424	8.45778	2.46068	1.54612	0.33495	1.28497	0.749856
1843	CRB1_Y760_R764C	CRB1	Y760	R764C		LENSTYQYICV	2	0.522398	0.204814	0.525988	0.210266	0.714521	0.183606	0.550266	0.0903333
1844	CRB1_Y760_R764C_YF	CRB1	Y760	R764C	YF	LENSTYQFICV	1	0.457261	0.0340869	0.739213	0.00247424	0.89973	0.109541	0.571068	0.177618
1845	CRB1_Y760_R764H	CRB1	Y760	R764H		LENSTYQYIHV	2	1.44565	0.233241	1.05757	0.282707	1.04758	0.366617	0.683252	0.361202
1846	CRB1_Y760_R764H_YF	CRB1	Y760	R764H	YF	LENSTYQFIHV	1	0.456128	0.119811	0.651518	0.471204	0.940375	0.320546	0.551756	0.35353
1847	CRB1_Y760_YF	CRB1	Y760		YF	LENSTYQFIRV	1	0.54571	0.169078	0.621834	0.191913	0.606992	0.133499	0.483163	0.242406
1848	CREBBP_Y1450	CREBBP	Y1450			LRTAVYHEILI	1	3.56352	0.634231	0.858073	0.185479	0.859783	0.394232	0.957741	0.352242
1849	CREBBP_Y1450_T1447I	CREBBP	Y1450	T1447I		LRIAVYHEILI	1	0.954264	0.374816	0.798449	0.584017	1.10111	0.19872	0.833139	0.329016
1850	CREBBP_Y1450_Y1450H	CREBBP	Y1450	Y1450H		LRTAVHHEILI	0	0.480002	0.142337	0.75607	0.244101	0.973008	0.144147	0.532419	0.311219
1851	CRELD1_Y328	CRELD1	Y328			NTEGGYRCICA	1	0.465171	0.0668383	0.489339	0.261807	0.96969	0.307761	0.599988	0.246524
1852	CRELD1_Y328_R329C	CRELD1	Y328	R329C		NTEGGYCCICA	1	0.632117	0.115379	0.693104	0.237678	0.704037	0.149341	0.59122	0.254207
1853	CRIM1_Y826	CRIM1	Y826			FSGKAYADEER	1	0.515252	0.0586733	0.747915	0.382201	1.00178	0.215575	0.543526	0.288517
1854	CRIM1_Y826_R831Q	CRIM1	Y826	R831Q		FSGKAYADEEQ	1	0.528081	0.0627274	0.800443	0.226544	0.992313	0.239994	0.494818	0.322856
1855	CRLF1_Y272	CRLF1	Y272			LFQAKYQIRYR	2	1.2193	0.846727	1.66964	0.728294	1.46159	0.36631	0.60951	0.253227
1856	CRLF1_Y272_F268S	CRLF1	Y272	F268S		LSQAKYQIRYR	2	0.368462	0.154435	0.557683	0.133338	1.29463	0.263634	0.674383	0.431465
1857	CRLF1_Y272_F268S_YF	CRLF1	Y272	F268S	YF	LSQAKYQIRFR	1	0.645142	0.150245	0.779978	0.318308	1.11823	0.386801	0.422355	0.210936
1858	CRLF1_Y272_YF	CRLF1	Y272		YF	LFQAKYQIRFR	1	0.812546	0.300267	1.32181	0.176296	1.18823	0.313803	0.745959	0.50112
1859	CRX_Y63	CRX	Y63			FAKTQYPDVYA	2	0.417977	0.103278	1.00501	0.721389	0.96323	0.135208	0.736059	0.194603
1860	CRX_Y63_V66I	CRX	Y63	V66I		FAKTQYPDIYA	2	0.532568	0.305849	0.999685	0.39382	0.880606	0.399437	0.764911	0.146554
1861	CRX_Y63_V66I_YF	CRX	Y63	V66I	YF	FAKTQYPDIFA	1	0.455814	0.17425	0.528501	0.103555	0.849111	0.199033	0.324138	0.185328
1862	CRX_Y63_YF	CRX	Y63		YF	FAKTQYPDVFA	1	0.486101	0.197984	0.54392	0.0751904	0.802641	0.103724	0.461019	0.293419
1863	CRX_Y67	CRX	Y67			QYPDVYAREEV	2	0.490065	0.339389	0.811808	0.349757	1.05158	0.315109	0.758008	0.171065
1864	CRX_Y67_V66I	CRX	Y67	V66I		QYPDIYAREEV	2	0.551829	0.0537778	0.298716	0.258836	0.687291	0.132455	0.615594	0.115357
1865	CRX_Y67_V66I_YF	CRX	Y67	V66I	YF	QFPDIYAREEV	1	0.525307	0.140272	0.89979	0.192319	1.01849	0.345572	0.637417	0.112433
1866	CRX_Y67_YF	CRX	Y67		YF	QFPDVYAREEV	1	0.658404	0.448098	0.776134	0.380532	0.853536	0.305628	0.761709	0.0860462
1867	CRYAA_Y18	CRYAA	Y18			TLGPFYPSRLF	1	0.717158	0.164982	1.13393	0.188298	1.16863	0.352541	0.652075	0.329499
1868	CRYAA_Y18_R21L	CRYAA	Y18	R21L		TLGPFYPSLLF	1	0.366232	0.107415	0.523852	0.107023	0.587606	0.20117	0.533577	0.262181
1869	CRYAA_Y48	CRYAA	Y48			TISPYYRQSLF	2	0.678308	0.170253	0.76697	0.263327	0.782731	0.18487	3.93388	0.876998
1870	CRYAA_Y48_R49C	CRYAA	Y48	R49C		TISPYYCQSLF	2	2.20655	0.693905	0.743029	0.201419	0.867142	0.380201	2.705	1.8204
1871	CRYAA_Y48_R49C_YF	CRYAA	Y48	R49C	YF	TISPFYCQSLF	1	0.631685	0.0869478	0.706533	0.285953	0.911896	0.225823	0.797644	0.0908203
1872	CRYAA_Y48_YF	CRYAA	Y48		YF	TISPFYRQSLF	1	0.611724	0.206464	0.705999	0.462667	0.84962	0.213787	0.456464	0.211939
1873	CRYBB1_Y131	CRYBB1	Y131			TWSSSYRSDRL	1	0.472812	0.125382	0.721999	0.159619	0.996536	0.172331	0.546312	0.213705
1874	CRYBB1_Y131_S129R	CRYBB1	Y131	S129R		TWSRSYRSDRL	1	0.379559	0.0343471	0.353801	0.133731	0.636097	0.324293	0.250674	0.121537
1875	CRYGS_Y21	CRYGS	Y21			FQGRRYDCDCD	1	0.570773	0.19242	0.687237	0.132741	0.92576	0.216668	0.438145	0.22678
1876	CRYGS_Y21_G18V	CRYGS	Y21	G18V		FQVRRYDCDCD	1	0.891392	0.206718	0.854242	0.306658	0.92112	0.172489	0.455497	0.202841
1877	CSF1R_Y708	CSF1R	Y708			HLEKKYVRRDS	1	0.875833	0.542892	1.24783	0.660121	1.02002	0.362316	0.391814	0.239642
1878	CSF1R_Y708_R710H	CSF1R	Y708	R710H		HLEKKYVHRDS	1	0.659431	0.240722	1.1687	0.272989	1.2586	0.286252	0.708813	0.342577
1879	CSF1R_Y873	CSF1R	Y873			LVKDGYQMAQP	1	0.634323	0.11261	1.00851	0.290779	0.874341	0.188357	0.970886	0.0889532
1880	CSF1R_Y873_L868P	CSF1R	Y873	L868P		PVKDGYQMAQP	1	0.52702	0.129473	0.672536	0.409053	0.838247	0.139477	0.579113	0.189183
1881	CSF1R_Y873_M875T	CSF1R	Y873	M875T		LVKDGYQTAQP	1	1.35252	0.993574	0.307477	0.374563	0.909288	0.589222	0.504778	0.0694844
1882	CSF1R_Y873_P878T	CSF1R	Y873	P878T		LVKDGYQMAQT	1	#DIV/0!	#DIV/0!	#DIV/0!	#DIV/0!	#DIV/0!	#DIV/0!	#DIV/0!	#DIV/0!
1883	CSF1R_Y923	CSF1R	Y923			RRERDYTNLPS	1	0.485566	0.178189	0.485055	0.211216	0.518736	0.208969	0.201698	0.143849
1884	CSF1R_Y923_E920D	CSF1R	Y923	E920D		RRDRDYTNLPS	1	1.44843	0.579353	0.677143	0.360358	1.87235	0.692275	0.355035	0.307781
1885	CSF1R_Y923_R921Q	CSF1R	Y923	R921Q		RREQDYTNLPS	1	0.758981	0.341513	0.821418	0.343953	0.926182	0.121988	0.401714	0.23617
1886	CSF1R_Y969	CSF1R	Y969			LQPNNYQFCGG	1	1.44012	0.0549167	0.888897	0.332804	1.24278	0.359523	1.28839	0.17624
1887	CSF1R_Y969_Y969C	CSF1R	Y969	Y969C		LQPNNCQFCGG	0	0.708675	0.365416	0.865423	0.145233	0.943413	0.0923734	0.387151	0.200018
1888	CSNK1A1_Y292	CSNK1A1	Y292			TLNHQYDYTFD	2	9.87873	1.73256	0.690801	0.12464	0.778629	0.152764	1.02647	0.156431
1889	CSNK1A1_Y292_D297H	CSNK1A1	Y292	D297H		TLNHQYDYTFH	2	7.33817	1.75031	0.874394	0.191448	1.01421	0.166449	1.71136	0.452079
1890	CSNK1A1_Y292_D297H_YF	CSNK1A1	Y292	D297H	YF	TLNHQYDFTFH	1	4.74065	0.539905	0.716819	0.129965	1.01314	0.220155	1.20079	0.286987
1891	CSNK1A1_Y292_YF	CSNK1A1	Y292		YF	TLNHQYDFTFD	1	8.50029	1.14085	0.700663	0.345266	0.843979	0.0326827	1.02992	0.408145
1892	CSNK1A1_Y294	CSNK1A1	Y294			NHQYDYTFDWT	2	3.00245	0.182466	0.560931	0.21314	1.06878	0.161463	0.992677	0.16785
1893	CSNK1A1_Y294_D297H	CSNK1A1	Y294	D297H		NHQYDYTFHWT	2	2.86033	0.920188	0.938449	0.323041	1.14452	0.329776	1.02725	0.305255
1894	CSNK1A1_Y294_D297H_YF	CSNK1A1	Y294	D297H	YF	NHQFDYTFHWT	1	0.523287	0.0763017	1.05224	0.15001	1.09532	0.29467	0.698034	0.311109
1895	CSNK1A1_Y294_YF	CSNK1A1	Y294		YF	NHQFDYTFDWT	1	0.605554	0.111606	0.829363	0.148437	1.01724	0.214908	0.699331	0.1778
1896	CSNK1G1_Y205	CSNK1G1	Y205			KKHIPYREHKS	1	1.87478	1.04203	2.10549	0.553865	1.98657	0.737349	1.82662	0.738202
1897	CSNK1G1_Y205_R206K	CSNK1G1	Y205	R206K		KKHIPYKEHKS	1	1.82343	1.27633	2.23389	0.332238	1.89068	0.722058	1.65289	0.567748
1898	CSNK1G2_Y195	CSNK1G2	Y195			GLAKEYIDPET	1	0.44799	0.218656	0.96694	0.234987	0.942382	0.183849	0.54193	0.314896
1899	CSNK1G2_Y195_E194G	CSNK1G2	Y195	E194G		GLAKGYIDPET	1	0.499829	0.101168	0.921866	0.281796	0.823221	0.230528	0.389988	0.261352
1900	CSNK1G2_Y195_I196T	CSNK1G2	Y195	I196T		GLAKEYTDPET	1	1.09751	0.436837	0.670906	0.563624	0.872699	0.129709	0.380705	0.232709
1901	CSNK1G2_Y206_E208Q	CSNK1G2	Y206	E208Q		KKHIPYRQHKS	1	1.79269	0.858509	1.83761	0.675305	2.06714	0.646477	1.75772	0.733049
1902	CSNK1G2_Y206_R207S	CSNK1G2	Y206	R207S		KKHIPYSEHKS	1	1.50838	1.03099	1.41357	0.41325	1.61924	0.166637	1.14453	0.236713
1903	CSNK1G2_Y206_Y206C	CSNK1G2	Y206	Y206C		KKHIPCREHKS	0	1.67909	1.19101	1.61875	0.825077	1.60447	0.110634	1.28882	0.241483
1904	CSNK1G2_Y206_Y206H	CSNK1G2	Y206	Y206H		KKHIPHREHKS	0	1.80296	0.996915	1.86577	0.278093	2.14887	0.678281	1.81749	0.683047
1905	CSNK2A1_Y131	CSNK2A1	Y131			QTLTDYDIRFY	2	0.54777	0.107982	0.775246	0.211357	0.794648	0.155396	1.40944	0.632336
1906	CSNK2A1_Y131_L128S	CSNK2A1	Y131	L128S		QTSTDYDIRFY	2	0.360397	0.125846	0.624966	0.141957	0.706953	0.242255	0.756343	0.127308
1907	CSNK2A1_Y131_L128S_YF	CSNK2A1	Y131	L128S	YF	QTSTDYDIRFF	1	0.476703	0.169179	0.864358	0.276261	1.15418	0.293896	0.729309	0.0797858
1908	CSNK2A1_Y131_YF	CSNK2A1	Y131		YF	QTLTDYDIRFF	1	0.412827	0.145537	0.651403	0.172075	0.793982	0.071013	0.723304	0.0718928
1909	CSNK2A1_Y50	CSNK2A1	Y50			LGRGKYSEVFE	1	1.43561	0.354893	0.700933	0.545759	0.73928	0.433035	0.421668	0.233042
1910	CSNK2A1_Y50_R47Q	CSNK2A1	Y50	R47Q		LGQGKYSEVFE	1	3.54502	0.783922	0.828558	0.0907298	0.950037	0.254277	0.535353	0.232884
1911	CSNK2A1_Y50_Y50S	CSNK2A1	Y50	Y50S		LGRGKSSEVFE	0	0.3371	0.113402	0.546552	0.253299	0.650269	0.121756	0.39268	0.236858
1912	CSNK2A3_Y131_I133T	CSNK2A3	Y131	I133T		QTLTDYDTRFY	2	0.677748	0.299093	0.757204	0.277672	0.815135	0.0847111	1.60526	0.380772
1913	CSNK2A3_Y131_I133T_YF	CSNK2A3	Y131	I133T	YF	QTLTDYDTRFF	1	0.708302	0.309312	0.851888	0.14644	0.861672	0.415301	0.872024	0.222721
1914	CSRP3_Y57	CSRP3	Y57			HESEIYCKVCY	2	1.79729	0.995837	1.80567	0.703479	1.58022	0.35003	0.944536	0.291883
1915	CSRP3_Y57_C58G	CSRP3	Y57	C58G		HESEIYGKVCY	2	0.422026	0.458407	0.34392	0.157992	0.770138	0.474388	0.510357	0.310796
1916	CSRP3_Y57_C58G_YF	CSRP3	Y57	C58G	YF	HESEIYGKVCF	1	0.455719	0.104885	0.671566	0.114578	0.997668	0.293164	0.652214	0.221328
1917	CSRP3_Y57_YF	CSRP3	Y57		YF	HESEIYCKVCF	1	1.54462	1.14884	1.35096	0.322748	1.43723	0.587895	0.826594	0.242278
1918	CSRP3_Y73	CSRP3	Y73			PKGIGYGQGAG	1	0.489431	0.228332	0.430241	0.271524	0.822624	0.0644604	0.449319	0.232629
1919	CSRP3_Y73_G72R	CSRP3	Y73	G72R		PKGIRYGQGAG	1	0.483894	0.189954	0.867489	0.376288	0.984341	0.0576009	0.484104	0.316753
1920	CST4_Y35	CST4	Y35			IPGGIYDADLN	1	0.823275	0.468173	0.876307	0.275764	0.990606	0.14318	0.802874	0.0856416
1921	CST4_Y35_D36N	CST4	Y35	D36N		IPGGIYNADLN	1	0.635487	0.399716	0.645733	0.192574	0.942734	0.160574	1.06476	0.645535
1922	CTCF_Y343	CTCF	Y343			VRHRRYKHTHE	1	0.363637	0.219984	0.714236	0.344426	0.665441	0.180879	0.2386	0.120638
1923	CTCF_Y343_H345R	CTCF	Y343	H345R		VRHRRYKRTHE	1	0.430187	0.0910225	0.392532	0.137031	0.623627	0.373265	0.312611	0.184749
1924	CTCF_Y343_K344E	CTCF	Y343	K344E		VRHRRYEHTHE	1	0.447637	0.263272	0.552958	0.202368	0.641956	0.144188	0.369124	0.150948
1925	CTCF_Y343_R339W	CTCF	Y343	R339W		VWHRRYKHTHE	1	0.310153	0.134052	0.602253	0.173534	0.682473	0.30458	0.257139	0.135049
1926	CTCF_Y343_R342H	CTCF	Y343	R342H		VRHRHYKHTHE	1	0.769994	0.617284	0.765556	0.128582	1.01173	0.512102	0.3296	0.147717
1927	CTNNA1_Y177	CTNNA1	Y177			DLGIQYKALKP	1	0.360967	0.189382	0.593771	0.353957	0.896941	0.171562	0.488594	0.278318
1928	CTNNA1_Y177_A179V	CTNNA1	Y177	A179V		DLGIQYKVLKP	1	0.410544	0.0730323	0.691291	0.499599	0.793475	0.0437778	0.53233	0.184677
1929	CTNNA1_Y222	CTNNA1	Y222			NVPILYTASQA	1	0.434812	0.209809	0.627853	0.372076	0.761785	0.157515	0.845227	0.159009
1930	CTNNA1_Y222_P219S	CTNNA1	Y222	P219S		NVSILYTASQA	1	0.498624	0.0496591	0.684651	0.0485652	0.921371	0.153954	1.39094	0.215855
1931	CTNNA3_Y614	CTNNA3	Y614			ISKKIYDTIHD	1	5.90534	1.93479	0.675486	0.170847	0.74602	0.298657	0.550018	0.33514
1932	CTNNA3_Y614_T616P	CTNNA3	Y614	T616P		ISKKIYDPIHD	1	0.425627	0.124463	0.647977	0.2107	0.690627	0.122537	0.43963	0.222683
1933	CTNNB1_Y30	CTNNB1	Y30			WQQQSYLDSGI	1	0.570536	0.157467	0.649414	0.0533254	0.726245	0.087602	0.65993	0.251681
1934	CTNNB1_Y30_D32A	CTNNB1	Y30	D32A		WQQQSYLASGI	1	0.520479	0.0688094	0.588178	0.245444	0.821845	0.187467	0.941495	0.362971
1935	CTNNB1_Y30_D32G	CTNNB1	Y30	D32G		WQQQSYLGSGI	1	0.499331	0.123224	0.664345	0.339262	0.858004	0.250355	0.68103	0.109564
1936	CTNNB1_Y30_D32Y	CTNNB1	Y30	D32Y		WQQQSYLYSGI	2	1.37264	0.33053	0.687219	0.156692	0.972158	0.476198	4.75364	5.02841
1937	CTNNB1_Y30_D32Y_YF	CTNNB1	Y30	D32Y	YF	WQQQSYLFSGI	1	0.641056	0.2685	0.881516	0.223322	1.02383	0.352682	2.35299	2.47579
1938	CTNNB1_Y30_G34E	CTNNB1	Y30	G34E		WQQQSYLDSEI	1	0.489626	0.136703	0.707028	0.175989	0.992381	0.340384	0.49507	0.175329
1939	CTNNB1_Y30_G34R	CTNNB1	Y30	G34R		WQQQSYLDSRI	1	0.571153	0.153433	0.645187	0.0594688	0.894473	0.174414	0.586236	0.0804655
1940	CTNNB1_Y30_G34V	CTNNB1	Y30	G34V		WQQQSYLDSVI	1	0.443667	0.122273	0.509105	0.0833318	0.757411	0.224115	0.645857	0.0859811
1941	CTNNB1_Y30_I35S	CTNNB1	Y30	I35S		WQQQSYLDSGS	1	0.480876	0.127787	0.58241	0.166143	0.733111	0.116949	0.572155	0.0473823
1942	CTNNB1_Y30_S33F	CTNNB1	Y30	S33F		WQQQSYLDFGI	1	0.591659	0.110757	0.776478	0.115178	0.998945	0.106081	0.947859	0.54847
1943	CTNNB1_Y30_S33L	CTNNB1	Y30	S33L		WQQQSYLDLGI	1	0.606656	0.18404	0.765614	0.214121	1.03529	0.250646	0.742878	0.3182
1944	CTNNB1_Y30_S33Y	CTNNB1	Y30	S33Y		WQQQSYLDYGI	2	0.510879	0.0483453	0.648293	0.158898	0.818017	0.240479	2.17865	2.39548
1945	CTNND1_Y174	CTNND1	Y174			SVSNNYIQTLG	1	0.638213	0.109092	0.80321	0.243323	0.845968	0.156473	0.947873	0.180574
1946	CTNND1_Y174_S171F	CTNND1	Y174	S171F		SVFNNYIQTLG	1	0.739108	0.0854043	0.916591	0.27631	1.05234	0.552831	1.12343	0.406119
1947	CTNND1_Y213	CTNND1	Y213			YPPDGYSRHYE	3	1.20667	0.45773	1.03743	0.921608	0.911127	0.360326	1.61334	0.458382
1948	CTNND1_Y213_Y217C	CTNND1	Y213	Y217C		YPPDGYSRHCE	2	0.692801	0.213525	0.666408	0.410182	0.900129	0.10678	0.814128	0.153398
1949	CTNND1_Y213_Y217C_YF	CTNND1	Y213	Y217C	YF	FPPDGYSRHCE	1	0.616805	0.0940088	0.705723	0.391024	0.985273	0.145295	0.871622	0.159282
1950	CTNND1_Y213_YF	CTNND1	Y213		YF	FPPDGYSRHFE	1	0.424423	0.108677	0.738216	0.0689902	0.818	0.289356	0.808512	0.149772
1951	CTNND1_Y217	CTNND1	Y217			GYSRHYEDGYP	3	1.46362	0.340831	0.676212	0.0877222	0.818032	0.18187	1.09863	0.203068
1952	CTNND1_Y217_Y217C	CTNND1	Y217	Y217C		GYSRHCEDGYP	2	0.543547	0.173381	0.563462	0.0914979	0.796122	0.397408	0.661615	0.0740054
1953	CTNND1_Y217_Y217C_YF	CTNND1	Y217	Y217C	YF	GFSRHCEDGFP	0	0.479219	0.213677	0.662838	0.172149	0.7739	0.200327	0.55221	0.315827
1954	CTNND1_Y217_YF	CTNND1	Y217		YF	GFSRHYEDGFP	1	1.43698	0.34496	0.564409	0.36561	0.707615	0.233589	0.76522	0.165603
1955	CTNND1_Y221	CTNND1	Y221			HYEDGYPGGSD	2	0.9244	0.265738	0.785622	0.333288	0.914993	0.34484	0.703072	0.296592
1956	CTNND1_Y221_Y217C	CTNND1	Y221	Y217C		HCEDGYPGGSD	1	0.639803	0.141825	0.652614	0.349582	1.05721	0.240771	0.610208	0.232854
1957	CTNND1_Y221_YF	CTNND1	Y221		YF	HFEDGYPGGSD	1	0.397249	0.205595	0.731374	0.077446	0.850549	0.18802	0.432033	0.196731
1958	CTNND2_Y1154	CTNND2	Y1154			PSRKDYETYQP	2	0.597272	0.0705324	0.817825	0.581552	0.904547	0.108482	1.00171	0.321583
1959	CTNND2_Y1154_P1159S	CTNND2	Y1154	P1159S		PSRKDYETYQS	2	0.74604	0.212823	0.898968	0.269078	0.97592	0.335867	0.757651	0.150729
1960	CTNND2_Y1154_P1159S_YF	CTNND2	Y1154	P1159S	YF	PSRKDYETFQS	1	0.438552	0.325022	0.549674	0.23614	0.759677	0.253118	0.345744	0.16545
1961	CTNND2_Y1154_YF	CTNND2	Y1154		YF	PSRKDYETFQP	1	0.644896	0.312705	0.372209	0.21268	0.884137	0.190433	0.680179	0.534665
1962	CTNND2_Y1157	CTNND2	Y1157			KDYETYQPFQN	2	0.429865	0.117053	0.663542	0.143757	0.887414	0.138915	0.546514	0.240021
1963	CTNND2_Y1157_P1159S	CTNND2	Y1157	P1159S		KDYETYQSFQN	2	0.532595	0.0648535	0.712259	0.322491	0.98149	0.292643	0.632432	0.272006
1964	CTNND2_Y1157_P1159S_YF	CTNND2	Y1157	P1159S	YF	KDFETYQSFQN	1	0.522594	0.184689	0.81609	0.157851	0.84573	0.128524	0.523444	0.232309
1965	CTNND2_Y1157_YF	CTNND2	Y1157		YF	KDFETYQPFQN	1	0.543661	0.233268	0.698594	0.444603	0.948292	0.138141	0.464395	0.258065
1966	CTNND2_Y1217	CTNND2	Y1217			YETSHYPASPD	2	0.760311	0.28185	0.723303	0.290892	0.73898	0.0205119	1.31445	0.277268
1967	CTNND2_Y1217_P1218L	CTNND2	Y1217	P1218L		YETSHYLASPD	2	1.0976	0.341402	0.674592	0.488139	1.10907	0.470315	2.48243	0.506283
1968	CTNND2_Y1217_P1218L_YF	CTNND2	Y1217	P1218L	YF	FETSHYLASPD	1	0.47279	0.0673783	0.903731	0.293604	0.922595	0.278418	0.877733	0.0902152
1969	CTNND2_Y1217_YF	CTNND2	Y1217		YF	FETSHYPASPD	1	0.383164	0.189151	0.991774	1.00412	1.02725	0.42388	0.504283	0.491084
1970	CTNND2_Y503	CTNND2	Y503			NYADPYRQLQY	3	1.49977	0.274274	1.12329	0.320119	0.892359	0.137798	4.74902	1.89372
1971	CTNND2_Y503_Q507P	CTNND2	Y503	Q507P		NYADPYRQLPY	3	1.25281	0.0703195	0.748582	0.0758775	0.775201	0.137772	5.74771	2.83978
1972	CTNND2_Y503_Q507P_YF	CTNND2	Y503	Q507P	YF	NFADPYRQLPF	1	0.612073	0.341765	0.816959	0.086051	0.728249	0.18364	5.07838	1.71916
1973	CTNND2_Y503_YF	CTNND2	Y503		YF	NFADPYRQLQF	1	0.555446	0.10166	1.04222	0.105476	0.877768	0.179224	3.41705	1.37119
1974	CTNND2_Y508	CTNND2	Y508			YRQLQYCPSVE	2	0.471825	0.00827433	0.487986	0.230329	0.678214	0.0200146	0.687155	0.0720803
1975	CTNND2_Y508_Q507P	CTNND2	Y508	Q507P		YRQLPYCPSVE	2	0.493846	0.0797588	0.584856	0.0749096	0.685776	0.25051	1.96266	1.23254
1976	CTNND2_Y508_Q507P_YF	CTNND2	Y508	Q507P	YF	FRQLPYCPSVE	1	0.458359	0.119561	0.472376	0.339851	0.72192	0.0491925	0.623781	0.0469111
1977	CTNND2_Y508_YF	CTNND2	Y508		YF	FRQLQYCPSVE	1	0.488935	0.165532	0.658424	0.0814049	0.875527	0.0550451	0.562967	0.166283
1978	CTNS_Y143	CTNS	Y143			WSISFYPQVIM	1	0.570808	0.0325647	0.587905	0.182905	0.882895	0.32028	0.6431	0.291473
1979	CTNS_Y143_S139F	CTNS	Y143	S139F		WFISFYPQVIM	1	0.443721	0.0902732	0.617948	0.172175	0.684147	0.112819	0.497947	0.160491
1980	CTPS1_Y567	CTPS1	Y567			SPRDTYSDRSG	1	0.478961	0.193953	0.503019	0.35562	0.760192	0.294179	1.31306	0.6585
1981	CTPS1_Y567_S571I	CTPS1	Y567	S571I		SPRDTYSDRIG	1	0.438001	0.166598	0.616625	0.0730238	0.843624	0.0395742	1.66887	0.679359
1982	CTRB2_Y246	CTRB2	Y246			TTPAVYARVAK	1	2.1227	0.673252	2.29963	0.701371	0.896974	0.16576	0.644006	0.327208
1983	CTRB2_Y246_A250T	CTRB2	Y246	A250T		TTPAVYARVTK	1	2.10837	0.675734	0.383216	0.381717	0.696036	0.28207	0.528172	0.524748
1984	CTSC_Y150	CTSC	Y150			ASENVYVNIAH	1	2.40202	0.350916	5.862	1.55411	6.93263	1.81435	1.17738	0.621029
1985	CTSC_Y150_I153T	CTSC	Y150	I153T		ASENVYVNTAH	1	1.268	0.492662	1.12334	0.540523	7.62021	5.27075	0.616058	0.226377
1986	CTSC_Y345	CTSC	Y345			YYSSEYHYVGG	4	1.98142	0.418809	1.1295	0.235953	0.928841	0.367088	5.81225	2.09886
1987	CTSC_Y345_Y340C	CTSC	Y345	Y340C		CYSSEYHYVGG	3	2.03666	1.9131	0.942776	0.322426	0.884417	0.112915	1.41101	0.869618
1988	CTSC_Y345_Y340C_YF	CTSC	Y345	Y340C	YF	CFSSEYHFVGG	1	0.652484	0.1628	0.693673	0.21922	0.943596	0.247944	0.629288	0.309432
1989	CTSC_Y345_Y347C	CTSC	Y345	Y347C		YYSSEYHCVGG	3	0.834227	0.380335	0.576147	0.270196	0.726296	0.128076	1.94109	1.39462
1990	CTSC_Y345_Y347C_YF	CTSC	Y345	Y347C	YF	FFSSEYHCVGG	1	0.70947	0.193728	0.80035	0.372751	0.870413	0.24461	0.54466	0.138992
1991	CTSC_Y345_YF	CTSC	Y345		YF	FFSSEYHFVGG	1	0.755555	0.0290473	1.67597	1.05021	0.990311	0.100963	0.552492	0.265776
1992	CTSC_Y347	CTSC	Y347			SSEYHYVGGFY	3	1.49183	0.790469	4.12092	1.40126	0.998018	0.115538	3.20585	2.3636
1993	CTSC_Y347_Y347C	CTSC	Y347	Y347C		SSEYHCVGGFY	2	0.397884	0.149337	0.764051	0.203263	0.556731	0.0633239	0.511108	0.172468
1994	CTSC_Y347_Y347C_YF	CTSC	Y347	Y347C	YF	SSEFHCVGGFF	0	0.373246	0.147172	0.640151	0.109701	0.883416	0.140904	0.581422	0.210422
1995	CTSC_Y347_YF	CTSC	Y347		YF	SSEFHYVGGFF	1	0.375582	0.125102	0.606574	0.122409	0.68828	0.137864	0.810629	0.218377
1996	CTSC_Y352	CTSC	Y352			YVGGFYGGCNE	2	1.2334	0.640231	0.65099	0.112618	0.770003	0.082195	2.02219	1.94246
1997	CTSC_Y352_Y347C	CTSC	Y352	Y347C		CVGGFYGGCNE	1	0.908227	0.361559	0.747531	0.335953	1.01221	0.303972	0.99439	0.314784
1998	CTSC_Y352_YF	CTSC	Y352		YF	FVGGFYGGCNE	1	0.589209	0.172582	0.563444	0.260685	0.894807	0.282885	0.869298	0.250498
1999	CTSD_Y232	CTSD	Y232			NIFSFYLSRDP	1	1.09352	0.278953	1.63575	0.901919	1.52121	0.276348	1.13016	0.33214
[truncated: 7,899 more rows]

## Sheet: c-Src
variant name	variant seq	reference name	reference seq	ref. AA	pos.	var. AA	var. enrich. R1	var. enrich. R2	var. enrich. R3	var. mean	var. stdev	ref. enrich. R1	ref. enrich. R2	ref. enrich. R3	ref. mean	ref. stdev	mean of log2(variant)	mean of log2(reference)	difference	SE of difference	p-value	hit?
A2M_Y708_R704H	LHVGFYESDVM	A2M_Y708	LRVGFYESDVM	R	-4	H	3.68382	3.58906	5.41904	4.23064	1.03027	2.79984	4.39647	5.21551	4.13727	1.22851	2.054	2.001	0.05278	0.3295	0.880513	FALSE
A2M_Y817_L815Q	ATVQNYLPKCI	A2M_Y817	ATVLNYLPKCI	L	-2	Q	0.516843	0.52388	0.448817	0.496513	0.041456	0.536491	0.738342	0.33025	0.535028	0.20405	-1.014	-0.9781	-0.03544	0.3449	0.923107	FALSE
AACS_Y117_I118V	DRVALYVAREG	AACS_Y117	DRVALYIAREG	I	1	V	0.689609	0.464603	0.121658	0.42529	0.286009	0.628249	0.566101	0.268044	0.487465	0.192548	-1.56	-1.13	-0.4301	0.8506	0.6397	FALSE
AASDH_Y870_T865A	ATGLIYIGSHD	AASDH_Y870	TTGLIYIGSHD	T	-5	A	1.03043	0.418143	0.345845	0.59814	0.376117	0.620878	0.909193	0.341576	0.623882	0.28382	-0.9155	-0.7916	-0.1239	0.6364	0.855083	FALSE
AASS_Y188_S191R	GMAHNYRNRSQ	AASS_Y188	GMAHNYRNSSQ	S	3	R	0.708863	0.490453	0.242146	0.480488	0.233518	0.63564	0.505447	0.303947	0.481678	0.167119	-1.19	-1.119	-0.07136	0.5528	0.903519	FALSE
AATK_Y93_L97V	NGPDVYVLPVT	AATK_Y93	NGPDVYVLPLT	L	4	V	0.737483	0.813311	0.230078	0.593624	0.317115	0.734745	0.64994	0.272141	0.552275	0.246281	-0.9524	-0.9813	0.02888	0.7388	0.970692	FALSE
ABCB7_Y345_F346I	YETVKYINNER	ABCB7_Y345	YETVKYFNNER	F	1	I	11.7224	12.4167	11.1474	11.7622	0.635596	10.2134	8.24699	10.4726	9.64431	1.21704	3.555	3.262	0.2931	0.1182	0.068307	FALSE
ABCB7_Y345_F346I_YF	FETVKYINNER	ABCB7_Y345_YF	FETVKYFNNER	F	1	I	0.553622	0.488236	0.279795	0.440551	0.143006	0.5297	0.648548	0.348871	0.50904	0.150903	-1.242	-1.02	-0.2214	0.4011	0.610325	FALSE
ABCC12_Y7_I9L	VGEGPYLLSDL	ABCC12_Y7	VGEGPYLISDL	I	2	L	0.35025	0.404899	0.328763	0.361304	0.0392531	0.563408	0.342117	0.335935	0.41382	0.129584	-1.474	-1.316	-0.158	0.2601	0.576426	FALSE
ABCC2_Y845_L849R	VEKGSYSALRA	ABCC2_Y845	VEKGSYSALLA	L	4	R	0.499194	0.571532	0.593726	0.554817	0.0494331	1.30218	1.66079	1.38285	1.44861	0.188134	-0.8539	0.5268	-1.381	0.13	0.000445	FALSE
ABCC6_Y372_N370D	EQQDMYRLKVL	ABCC6_Y372	EQQNMYRLKVL	N	-2	D	0.492915	0.528486	0.718163	0.579855	0.121092	0.45671	0.790906	0.249426	0.499014	0.273207	-0.8061	-1.157	0.3514	0.5089	0.527886	FALSE
ABCD1_Y180_Q178E	FSQETYYRVSN	ABCD1_Y180	FSQQTYYRVSN	Q	-2	E	0.687178	0.737594	0.537438	0.65407	0.104104	1.04994	0.705856	0.703355	0.819717	0.199383	-0.6254	-0.3133	-0.3121	0.2365	0.257478	FALSE
ABCD1_Y180_R182P	FSQQTYYPVSN	ABCD1_Y180	FSQQTYYRVSN	R	2	P	0.997082	0.411506	1.22238	0.876991	0.418566	1.04994	0.705856	0.703355	0.819717	0.199383	-0.3318	-0.3133	-0.01854	0.5189	0.973212	FALSE
ABCD1_Y180_Y181C	FSQQTYCRVSN	ABCD1_Y180	FSQQTYYRVSN	Y	1	C	0.869773	1.10958	1.06741	1.01559	0.128028	1.04994	0.705856	0.703355	0.819717	0.199383	0.01428	-0.3133	0.3276	0.2206	0.211746	FALSE
ABCD1_Y180_Q178E_YF	FSQETYFRVSN	ABCD1_Y180_YF	FSQQTYFRVSN	Q	-2	E	0.363607	0.487833	0.547179	0.466207	0.0936773	1.34632	0.689569	1.24027	1.09205	0.352572	-1.122	0.06782	-1.189	0.351	0.027564	FALSE
ABCD1_Y180_R182P_YF	FSQQTYFPVSN	ABCD1_Y180_YF	FSQQTYFRVSN	R	2	P	0.361159	0.775465	0.6605	0.599041	0.213881	1.34632	0.689569	1.24027	1.09205	0.352572	-0.8115	0.06782	-0.8793	0.4528	0.124092	FALSE
ABCD1_Y181_Q178E	SQETYYRVSNM	ABCD1_Y181	SQQTYYRVSNM	Q	-3	E	0.297028	0.618124	0.502518	0.472557	0.162631	0.823761	0.645554	0.4382	0.635838	0.192964	-1.146	-0.7005	-0.4456	0.4115	0.339813	FALSE
ABCD1_Y181_R182P	SQQTYYPVSNM	ABCD1_Y181	SQQTYYRVSNM	R	1	P	0.574164	0.657494	0.364183	0.531947	0.151144	0.823761	0.645554	0.4382	0.635838	0.192964	-0.9542	-0.7005	-0.2538	0.3698	0.530294	FALSE
ABCD1_Y181_Y181C	SQQTYCRVSNM	ABCD1_Y181	SQQTYYRVSNM	Y	0	C	0.776492	0.764014	1.49787	1.01279	0.420135	0.823761	0.645554	0.4382	0.635838	0.192964	-0.05679	-0.7005	0.6437	0.4155	0.196272	FALSE
ABCD1_Y181_Q178E_YF	SQETFYRVSNM	ABCD1_Y181_YF	SQQTFYRVSNM	Q	-3	E	0.679781	0.723949	0.387585	0.597105	0.182788	0.599397	0.622669	0.352586	0.524884	0.149668	-0.7968	-0.9753	0.1785	0.3902	0.671042	FALSE
ABCD1_Y181_R182P_YF	SQQTFYPVSNM	ABCD1_Y181_YF	SQQTFYRVSNM	R	1	P	0.545751	0.659107	0.194577	0.466478	0.242198	0.599397	0.622669	0.352586	0.524884	0.149668	-1.279	-0.9753	-0.3036	0.6077	0.643601	FALSE
ABCD1_Y181_Y181C_YF	SQQTFCRVSNM	ABCD1_Y181_YF	SQQTFYRVSNM	Y	0	C	0.474298	0.726547	0.304311	0.501719	0.212449	0.599397	0.622669	0.352586	0.524884	0.149668	-1.084	-0.9753	-0.1092	0.4489	0.819787	FALSE
ABCD1_Y281_G277R	KRELRYMHSRV	ABCD1_Y281	KGELRYMHSRV	G	-4	R	0.714202	0.590854	3.1747	1.49325	1.45748	0.734013	0.866807	2.21694	1.27259	0.820525	0.1406	0.1654	-0.02478	0.9137	0.979666	FALSE
ABCD1_Y281_G277W	KWELRYMHSRV	ABCD1_Y281	KGELRYMHSRV	G	-4	W	0.581089	0.723387	0.843973	0.71615	0.131591	0.734013	0.866807	2.21694	1.27259	0.820525	-0.4984	0.1654	-0.6638	0.5204	0.271202	FALSE
ABCD1_Y281_K276E	EGELRYMHSRV	ABCD1_Y281	KGELRYMHSRV	K	-5	E	0.541738	0.498013	0.257274	0.432342	0.153182	0.734013	0.866807	2.21694	1.27259	0.820525	-1.283	0.1654	-1.448	0.6015	0.073734	FALSE
ABCD1_Y281_R280C	KGELCYMHSRV	ABCD1_Y281	KGELRYMHSRV	R	-1	C	0.470559	0.808096	0.618228	0.632294	0.169208	0.734013	0.866807	2.21694	1.27259	0.820525	-0.6962	0.1654	-0.8617	0.5451	0.189115	FALSE
ABCD1_Y281_R285P	KGELRYMHSPV	ABCD1_Y281	KGELRYMHSRV	R	4	P	0.406734	0.557524	0.633365	0.532541	0.115363	0.734013	0.866807	2.21694	1.27259	0.820525	-0.9332	0.1654	-1.099	0.5315	0.1076	FALSE
ABCD1_Y337_K336M	QFLMMYVWSAS	ABCD1_Y337	QFLMKYVWSAS	K	-1	M	0.392601	0.483802	0.753202	0.543202	0.187496	0.718878	0.547911	0.22968	0.498823	0.248266	-0.9351	-1.155	0.2204	0.5686	0.718023	FALSE
ABCD1_Y337_S342P	QFLMKYVWSAP	ABCD1_Y337	QFLMKYVWSAS	S	5	P	0.559542	0.748913	0.477028	0.595161	0.139398	0.718878	0.547911	0.22968	0.498823	0.248266	-0.7742	-1.155	0.3813	0.5318	0.513017	FALSE
ABCD1_Y337_W339R	QFLMKYVRSAS	ABCD1_Y337	QFLMKYVWSAS	W	2	R	0.392115	0.365875	0.348102	0.368697	0.0221422	0.718878	0.547911	0.22968	0.498823	0.248266	-1.441	-1.155	-0.2857	0.499	0.597532	FALSE
ABCG8_Y209_V210M	RVGNMYMRGLS	ABCG8_Y209	RVGNMYVRGLS	V	1	M	0.79455	0.467017	1.76849	1.01002	0.676965	0.424809	0.539784	0.726222	0.563605	0.152112	-0.2026	-0.8621	0.6595	0.6015	0.334448	FALSE
ABHD12_Y345_A349T	LGRKLYSIATP	ABHD12_Y345	LGRKLYSIAAP	A	4	T	0.82018	0.669029	0.357771	0.61566	0.235779	0.686202	0.557524	0.536657	0.593461	0.0809911	-0.7829	-0.7614	-0.02154	0.3766	0.957133	FALSE
ABI1_Y333_G331A	TSSAGYRRTPS	ABI1_Y333	TSSGGYRRTPS	G	-2	A	0.950622	0.314965	0.084634	0.450074	0.448525	0.916788	0.735528	0.326556	0.659624	0.302348	-1.767	-0.7277	-1.04	1.106	0.400229	FALSE
ABL1_Y139_L140P	RNAAEYPLSSG	ABL1_Y139	RNAAEYLLSSG	L	1	P	0.364711	0.836286	0.28984	0.496946	0.296252	0.715095	0.788498	0.194045	0.565879	0.324103	-1.167	-1.064	-0.1025	0.8004	0.904246	FALSE
ABL1_Y167_R166K	SISLKYEGRVY	ABL1_Y167	SISLRYEGRVY	R	-1	K	0.424118	0.418143	0.322498	0.388253	0.0570238	0.737582	0.685701	0.630601	0.684628	0.0534984	-1.376	-0.5496	-0.8265	0.1441	0.004578	FALSE
ABL1_Y167_R166K_YF	SISLKYEGRVF	ABL1_Y167_YF	SISLRYEGRVF	R	-1	K	0.606367	0.498937	0.362926	0.48941	0.122	0.797916	0.588701	0.653463	0.680027	0.107107	-1.062	-0.568	-0.4944	0.2513	0.120514	FALSE
ABL1_Y226_Y226C	NKPTVCGVSPN	ABL1_Y226	NKPTVYGVSPN	Y	0	C	0.590544	0.646938	0.438764	0.558749	0.107668	0.434108	0.687402	0.382966	0.501492	0.16302	-0.8589	-1.043	0.1842	0.3073	0.581098	FALSE
ABL2_Y515_R519I	CPPKVYELMIA	ABL2_Y515	CPPKVYELMRA	R	4	I	1.19343	1.45328	1.68028	1.44233	0.243607	1.18731	1.81424	1.60095	1.53417	0.318755	0.5144	0.5953	-0.08095	0.231	0.743727	FALSE
ABL2_Y80_R78H	ALHHPYGCDVE	ABL2_Y80	ALHRPYGCDVE	R	-2	H	0.753215	0.73894	0.827162	0.773106	0.0473551	0.604002	0.788123	0.354713	0.582279	0.21752	-0.373	-0.8554	0.4824	0.3423	0.231583	FALSE
ABLIM1_Y439_P434T	TSAEGYQDVRD	ABLIM1_Y439	PSAEGYQDVRD	P	-5	T	4.66236	4.50308	5.38147	4.84897	0.467988	3.29529	5.22392	2.88772	3.80231	1.2479	2.273	1.878	0.3948	0.2709	0.218716	FALSE
ABLIM1_Y638_R637G	LLASGYDSPIN	ABLIM1_Y638	LLASRYDSPIN	R	-1	G	2.03603	1.63178	1.86571	1.84451	0.202961	2.76503	3.54585	1.59009	2.63366	0.984475	0.8773	1.321	-0.4435	0.3543	0.278849	FALSE
ACAD9_Y325_A326T	EMTAEYTCTRK	ACAD9_Y325	EMTAEYACTRK	A	1	T	0.280901	0.733041	0.216013	0.409985	0.281649	0.968357	0.7343	0.373326	0.691995	0.299763	-1.497	-0.6378	-0.8591	0.6737	0.271248	FALSE
ACAD9_Y611_L606H	HEKRAYICAHP	ACAD9_Y611	LEKRAYICAHP	L	-5	H	0.964173	0.860882	1.08176	0.96894	0.110518	0.421111	0.51584	0.389033	0.441995	0.0659326	-0.05179	-1.188	1.136	0.1541	0.0018	FALSE
ACADM_Y352_Y352C	GRRNTCYASIA	ACADM_Y352	GRRNTYYASIA	Y	0	C	2.91973	3.58127	4.23939	3.58013	0.659833	1.36438	0.864877	0.768545	0.999267	0.319843	1.823	-0.047	1.87	0.2965	0.00323	TRUE
ACADM_Y352_Y352C_YF	GRRNTCFASIA	ACADM_Y352_YF	GRRNTYFASIA	Y	0	C	0.503024	0.557524	0.525335	0.528628	0.0273986	0.651938	0.270563	0.146778	0.356426	0.263299	-0.921	-1.757	0.8362	0.6258	0.252423	FALSE
ACADM_Y353_Y352C	RRNTCYASIAK	ACADM_Y353	RRNTYYASIAK	Y	-1	C	2.47193	2.2907	4.28102	3.01455	1.10053	1.83358	0.737899	0.286217	0.952564	0.795702	1.533	-0.4562	1.989	0.8241	0.07324	FALSE
ACADM_Y73_I78T	DKTGEYPVPLT	ACADM_Y73	DKTGEYPVPLI	I	5	T	0.53749	0.672477	0.21055	0.473506	0.237518	0.545279	0.431989	0.218638	0.398635	0.165855	-1.239	-1.426	0.1878	0.6479	0.786342	FALSE
ACADSB_Y372_E376G	ASMAKYYASGI	ACADSB_Y372	ASMAKYYASEI	E	4	G	0.63564	0.382972	0.379454	0.466022	0.146904	0.574781	0.605586	0.544049	0.574805	0.0307689	-1.145	-0.8002	-0.3452	0.2499	0.239315	FALSE
ACADSB_Y372_E376G_YF	ASMAKYFASGI	ACADSB_Y372_YF	ASMAKYFASEI	E	4	G	0.504069	0.519074	0.311252	0.444799	0.115897	0.647174	0.428342	0.414807	0.496774	0.130425	-1.206	-1.04	-0.1659	0.3161	0.627425	FALSE
ACADSB_Y373_E376G	SMAKYYASGIA	ACADSB_Y373	SMAKYYASEIA	E	3	G	0.600199	0.712807	0.420907	0.577971	0.147214	0.748886	0.337449	0.353354	0.479896	0.233088	-0.8244	-1.162	0.3373	0.4348	0.481172	FALSE
ACADSB_Y373_E376G_YF	SMAKFYASGIA	ACADSB_Y373_YF	SMAKFYASEIA	E	3	G	0.413381	0.531678	0.132355	0.359138	0.205114	0.484482	0.489945	0.20392	0.392782	0.163582	-1.701	-1.456	-0.2449	0.7459	0.759148	FALSE
ACAN_Y100_D102E	RVNSAYQEKVS	ACAN_Y100	RVNSAYQDKVS	D	2	E	0.5297	0.575803	0.238514	0.448006	0.182884	0.458394	0.610263	0.296406	0.455021	0.156956	-1.26	-1.197	-0.06292	0.506	0.907027	FALSE
ACAT1_Y161_N158D	MSDVPYVMNRG	ACAT1_Y161	MSNVPYVMNRG	N	-3	D	0.491014	0.519511	0.34693	0.452485	0.0925173	0.564655	0.421686	0.212012	0.399451	0.177369	-1.166	-1.436	0.27	0.4568	0.586304	FALSE
ACAT1_Y331_A333P	PIAPVYAPSMV	ACAT1_Y331	PIAPVYAASMV	A	2	P	0.599397	0.797569	0.464951	0.620639	0.167323	0.708652	0.506596	0.303947	0.506399	0.202353	-0.7232	-1.065	0.3422	0.4203	0.461263	FALSE
ACAT1_Y90_N93S	EVKEAYMGSVL	ACAT1_Y90	EVKEAYMGNVL	N	3	S	0.690004	0.386853	0.278003	0.45162	0.2135	0.561418	0.718683	0.346162	0.542088	0.187011	-1.251	-0.9466	-0.3041	0.4926	0.570418	FALSE
ACE_Y151_A154T	NMSRIYSTTKV	ACE_Y151	NMSRIYSTAKV	A	3	T	0.372445	0.611916	0.203675	0.396012	0.205139	0.681043	0.552264	0.402067	0.545124	0.139625	-1.476	-0.9084	-0.568	0.5093	0.32726	FALSE
ACO2_Y665_G661R	IRDENYGEGSS	ACO2_Y665	IGDENYGEGSS	G	-4	R	0.651531	0.622766	0.322911	0.532403	0.181994	0.455542	0.645554	0.246821	0.449305	0.19944	-0.9774	-1.261	0.284	0.521	0.614631	FALSE
ACO2_Y71_L74V	SEKIVYGHVDD	ACO2_Y71	SEKIVYGHLDD	L	3	V	0.64699	0.685754	0.33392	0.555555	0.192918	0.687819	0.560692	0.431483	0.559998	0.12817	-0.9183	-0.8624	-0.05587	0.3857	0.891837	FALSE
ACOT4_Y52_R57C	RAHARYCADAC	ACOT4_Y52	RAHARYCADAR	R	5	C	0.445723	0.657082	1.513	0.871934	0.565146	0.510081	0.736352	0.720842	0.655759	0.126398	-0.3914	-0.6283	0.2369	0.5478	0.687659	FALSE
ACOX1_Y232_G231V	GPKFVYDEIDN	ACOX1_Y232	GPKFGYDEIDN	G	-1	V	35.2419	19.1226	19.2291	24.5312	9.27588	19.7995	13.5175	16.7656	16.6942	3.14159	4.554	4.044	0.51	0.3333	0.200669	FALSE
ACOX1_Y275_M278V	SNKLTYGTVVF	ACOX1_Y275	SNKLTYGTMVF	M	3	V	0.773641	0.635104	0.381622	0.596789	0.198798	0.514391	0.564493	0.433264	0.504049	0.0662228	-0.805	-0.9969	0.1919	0.3236	0.585104	FALSE
ACOXL_Y260_T255M	MIAIRYSHSRR	ACOXL_Y260	TIAIRYSHSRR	T	-5	M	0.931541	0.589689	0.160121	0.56045	0.38654	0.79455	0.33289	0.356261	0.494567	0.260055	-1.169	-1.136	-0.03313	0.8612	0.971159	FALSE
ACP1_Y132_S137F	IIEDPYYGNDF	ACP1_Y132	IIEDPYYGNDS	S	5	F	0.651816	0.836286	0.690719	0.726274	0.0972386	0.941926	0.842719	0.727468	0.837371	0.107329	-0.4697	-0.2641	-0.2057	0.1531	0.250406	FALSE
ACP1_Y132_S137F_YF	IIEDPYFGNDF	ACP1_Y132_YF	IIEDPYFGNDS	S	5	F	0.77288	0.498082	0.285568	0.518843	0.244319	0.610101	0.683073	0.33025	0.541141	0.186246	-1.062	-0.9537	-0.1081	0.5281	0.847843	FALSE
ACP1_Y133_S137F	IEDPYYGNDFD	ACP1_Y133	IEDPYYGNDSD	S	4	F	0.739542	0.617853	0.681469	0.679621	0.0608658	0.689842	0.519998	0.65797	0.622603	0.0902762	-0.5611	-0.6943	0.1333	0.1467	0.415087	FALSE
ACP1_Y133_S137F_YF	IEDPFYGNDFD	ACP1_Y133_YF	IEDPFYGNDSD	S	4	F	0.828505	0.717664	0.661334	0.735834	0.0850536	0.548813	0.501771	0.535202	0.528595	0.0242065	-0.4489	-0.9208	0.4719	0.1025	0.010011	FALSE
ACSBG1_Y677_A673V	AVARPYHIQKW	ACSBG1_Y677	AAARPYHIQKW	A	-4	V	0.72902	1.1039	1.9933	1.2754	0.649353	0.801708	0.924316	1.83179	1.18594	0.562673	0.2273	0.147	0.08031	0.5592	0.89274	FALSE
ACSF3_Y355_E359K	TLLERYGMTKI	ACSF3_Y355	TLLERYGMTEI	E	4	K	0.454028	0.562592	0.281324	0.432648	0.141848	0.595912	0.453984	0.336726	0.462207	0.129789	-1.266	-1.152	-0.1141	0.3793	0.778626	FALSE
ACSF3_Y355_T358I	TLLERYGMIEI	ACSF3_Y355	TLLERYGMTEI	T	3	I	1.14415	0.836286	0.967686	0.982708	0.154482	0.595912	0.453984	0.336726	0.462207	0.129789	-0.03701	-1.152	1.115	0.2713	0.014735	FALSE
ACSF3_Y466_K462T	FTDGQYWIRGR	ACSF3_Y466	FKDGQYWIRGR	K	-4	T	0.286407	0.499732	0.287524	0.357888	0.122842	0.742956	0.511064	0.12535	0.45979	0.311979	-1.534	-1.464	-0.06995	0.8258	0.936566	FALSE
ACSF3_Y466_R471Q	FKDGQYWIRGQ	ACSF3_Y466	FKDGQYWIRGR	R	5	Q	0.594597	0.603984	0.576871	0.591817	0.0137685	0.742956	0.511064	0.12535	0.45979	0.311979	-0.757	-1.464	0.7073	0.7817	0.416747	FALSE
ACSF3_Y466_R471W	FKDGQYWIRGW	ACSF3_Y466	FKDGQYWIRGR	R	5	W	0.350926	0.579604	0.480146	0.470225	0.114661	0.742956	0.511064	0.12535	0.45979	0.311979	-1.119	-1.464	0.3457	0.8095	0.691368	FALSE
ACSM1_Y477_I479V	INASGYRVGPA	ACSM1_Y477	INASGYRIGPA	I	2	V	0.344458	0.416161	0.314233	0.358284	0.0523519	0.56923	0.413647	0.377541	0.453472	0.101861	-1.491	-1.164	-0.3269	0.2156	0.204033	FALSE
ACTA1_Y145_A140P	PVLSLYASGRT	ACTA1_Y145	AVLSLYASGRT	A	-5	P	0.320608	0.937654	0.194705	0.484322	0.397612	0.505496	0.70041	0.457947	0.554617	0.128479	-1.365	-0.8749	-0.49	0.6942	0.519256	FALSE
ACTA1_Y145_G148D	AVLSLYASDRT	ACTA1_Y145	AVLSLYASGRT	G	3	D	0.527474	0.494169	0.335291	0.452311	0.102701	0.505496	0.70041	0.457947	0.554617	0.128479	-1.172	-0.8749	-0.2972	0.2756	0.34151	FALSE
ACTA1_Y145_L142P	AVPSLYASGRT	ACTA1_Y145	AVLSLYASGRT	L	-3	P	0.447956	0.592234	0.204441	0.414877	0.196001	0.505496	0.70041	0.457947	0.554617	0.128479	-1.402	-0.8749	-0.5266	0.4953	0.347564	FALSE
ACTA1_Y145_T150N	AVLSLYASGRN	ACTA1_Y145	AVLSLYASGRT	T	5	N	0.658029	0.796463	0.551776	0.668756	0.122695	0.505496	0.70041	0.457947	0.554617	0.128479	-0.5966	-0.8749	0.2783	0.2402	0.311093	FALSE
ACTA1_Y168_A172G	HNVPIYEGYGL	ACTA1_Y168	HNVPIYEGYAL	A	4	G	1.60151	1.31876	1.08415	1.33481	0.259053	3.14474	3.29643	2.46465	2.96861	0.442983	0.3984	1.558	-1.16	0.2081	0.005075	TRUE
ACTA1_Y168_V165L	HNLPIYEGYAL	ACTA1_Y168	HNVPIYEGYAL	V	-3	L	2.6162	3.43806	2.48055	2.84494	0.518122	3.14474	3.29643	2.46465	2.96861	0.442983	1.493	1.558	-0.06517	0.1954	0.7555	FALSE
ACTA1_Y168_V165M	HNMPIYEGYAL	ACTA1_Y168	HNVPIYEGYAL	V	-3	M	3.75298	2.68421	2.34646	2.92788	0.734238	3.14474	3.29643	2.46465	2.96861	0.442983	1.521	1.558	-0.0374	0.2398	0.883592	FALSE
ACTA1_Y168_A172G_YF	HNVPIYEGFGL	ACTA1_Y168_YF	HNVPIYEGFAL	A	4	G	0.422105	0.621241	0.495375	0.512907	0.100719	0.47673	0.468013	0.34693	0.430558	0.072555	-0.9815	-1.23	0.249	0.2196	0.320327	FALSE
ACTA1_Y168_V165L_YF	HNLPIYEGFAL	ACTA1_Y168_YF	HNVPIYEGFAL	V	-3	L	0.623176	0.533284	0.581378	0.579279	0.044983	0.47673	0.468013	0.34693	0.430558	0.072555	-0.7906	-1.23	0.4399	0.1622	0.053427	FALSE
ACTA1_Y168_V165M_YF	HNMPIYEGFAL	ACTA1_Y168_YF	HNVPIYEGFAL	V	-3	M	0.422105	0.631159	0.238514	0.430593	0.19646	0.47673	0.468013	0.34693	0.430558	0.072555	-1.325	-1.23	-0.0949	0.4336	0.837463	FALSE
ACTA1_Y171_A172G	PIYEGYGLPHA	ACTA1_Y171	PIYEGYALPHA	A	1	G	0.863641	0.589689	0.763245	0.738858	0.138595	2.61712	2.08174	1.64792	2.11559	0.485488	-0.4544	1.055	-1.51	0.2518	0.003892	TRUE
ACTA1_Y171_A172G_YF	PIFEGYGLPHA	ACTA1_Y171_YF	PIFEGYALPHA	A	1	G	0.560092	0.686503	0.302506	0.516367	0.195697	6.29964	4.4505	3.09742	4.61585	1.60751	-1.035	2.147	-3.181	0.4623	0.002337	TRUE
ACTA1_Y190_R185C	CDLTDYLMKIL	ACTA1_Y190	RDLTDYLMKIL	R	-5	C	0.520407	0.529351	0.94263	0.664129	0.24123	1.04483	0.987033	1.42727	1.15304	0.239237	-0.6484	0.1859	-0.8343	0.3266	0.063023	FALSE
ACTA1_Y190_R185D	DDLTDYLMKIL	ACTA1_Y190	RDLTDYLMKIL	R	-5	D	0.769192	0.785381	0.513723	0.689432	0.152384	1.04483	0.987033	1.42727	1.15304	0.239237	-0.5627	0.1859	-0.7486	0.259	0.044548	FALSE
ACTA1_Y190_R185G	GDLTDYLMKIL	ACTA1_Y190	RDLTDYLMKIL	R	-5	G	0.825506	0.878629	0.428888	0.711008	0.245763	1.04483	0.987033	1.42727	1.15304	0.239237	-0.5616	0.1859	-0.7474	0.3699	0.113436	FALSE
ACTA1_Y190_R185S	SDLTDYLMKIL	ACTA1_Y190	RDLTDYLMKIL	R	-5	S	0.802826	0.703805	0.318019	0.608217	0.256149	1.04483	0.987033	1.42727	1.15304	0.239237	-0.8255	0.1859	-1.011	0.4489	0.08734	FALSE
ACTA1_Y200_E197D	LTDRGYSFVTT	ACTA1_Y200	LTERGYSFVTT	E	-3	D	11.7417	9.62996	8.62799	9.99987	1.58946	8.75132	8.01101	6.63021	7.79751	1.07655	3.31	2.954	0.3565	0.1757	0.112317	FALSE
ACTA1_Y200_G199S	LTERSYSFVTT	ACTA1_Y200	LTERGYSFVTT	G	-1	S	4.12173	4.93678	6.64549	5.23467	1.28798	8.75132	8.01101	6.63021	7.79751	1.07655	2.36	2.954	-0.5938	0.2331	0.063451	FALSE
ACTA1_Y200_R198L	LTELGYSFVTT	ACTA1_Y200	LTERGYSFVTT	R	-2	L	11.0401	8.15379	7.20159	8.79848	1.9988	8.75132	8.01101	6.63021	7.79751	1.07655	3.113	2.954	0.16	0.2178	0.503471	FALSE
ACTA1_Y220_L223P	KEKLCYVAPDF	ACTA1_Y220	KEKLCYVALDF	L	3	P	0.607597	0.769588	0.794128	0.723771	0.101355	0.336738	0.481997	0.560508	0.459748	0.113532	-0.4764	-1.153	0.6764	0.2498	0.053648	FALSE
ACTA1_Y242_E243K	SLEKSYKLPDG	ACTA1_Y242	SLEKSYELPDG	E	1	K	0.695231	0.45908	0.253421	0.469244	0.22108	1.58232	1.29901	0.899419	1.26025	0.343098	-1.209	0.2955	-1.505	0.4853	0.036195	FALSE
ACTA1_Y281_M285K	IHETTYNSIKK	ACTA1_Y281	IHETTYNSIMK	M	4	K	1.10819	1.03473	1.0141	1.05234	0.0494539	1.6947	1.79625	2.28703	1.92599	0.316761	0.07255	0.9332	-0.8606	0.1379	0.003363	FALSE
ACTA1_Y281_N282K	IHETTYKSIMK	ACTA1_Y281	IHETTYNSIMK	N	1	K	0.444409	0.765113	0.441429	0.550317	0.186024	1.6947	1.79625	2.28703	1.92599	0.316761	-0.912	0.9332	-1.845	0.2943	0.003305	FALSE
ACTA1_Y281_Y281H	IHETTHNSIMK	ACTA1_Y281	IHETTYNSIMK	Y	0	H	0.416193	0.541685	0.332607	0.430162	0.105237	1.6947	1.79625	2.28703	1.92599	0.316761	-1.246	0.9332	-2.179	0.2426	0.000851	FALSE
ACTA1_Y296_D294V	IRKVLYANNVM	ACTA1_Y296	IRKDLYANNVM	D	-2	V	0.875523	0.754697	0.82912	0.81978	0.0609521	0.47673	0.605881	1.11307	0.731892	0.336363	-0.2894	-0.5457	0.2563	0.3694	0.525968	FALSE
ACTA1_Y364_I359L	LTKQEYDEAGP	ACTA1_Y364	ITKQEYDEAGP	I	-5	L	11.4293	8.85201	5.83034	8.70388	2.80241	10.0182	6.36506	6.72137	7.70156	2.0142	3.068	2.914	0.1536	0.3502	0.683636	FALSE
ACTA1_Y71_E74K	ILTLKYPIKHG	ACTA1_Y71	ILTLKYPIEHG	E	3	K	0.786186	0.698342	0.875997	0.786842	0.0888295	0.57729	0.563487	0.366116	0.502298	0.118138	-0.352	-1.023	0.6712	0.2334	0.045182	FALSE
ACTA1_Y71_H75L	ILTLKYPIELG	ACTA1_Y71	ILTLKYPIEHG	H	4	L	0.720293	0.799607	0.672321	0.73074	0.0642825	0.57729	0.563487	0.366116	0.502298	0.118138	-0.4563	-1.023	0.567	0.2255	0.065714	FALSE
ACTA1_Y71_H75R	ILTLKYPIERG	ACTA1_Y71	ILTLKYPIEHG	H	4	R	0.871133	0.632668	0.569356	0.691052	0.159135	0.57729	0.563487	0.366116	0.502298	0.118138	-0.5574	-1.023	0.4659	0.2821	0.173965	FALSE
ACTA1_Y71_I66N	NLTLKYPIEHG	ACTA1_Y71	ILTLKYPIEHG	I	-5	N	0.721655	0.591313	0.206712	0.50656	0.267729	0.57729	0.563487	0.366116	0.502298	0.118138	-1.168	-1.023	-0.1444	0.5988	0.821337	FALSE
ACTA1_Y71_T68I	ILILKYPIEHG	ACTA1_Y71	ILTLKYPIEHG	T	-3	I	1.56388	1.07197	2.11627	1.58404	0.522444	0.57729	0.563487	0.366116	0.502298	0.118138	0.609	-1.023	1.632	0.3551	0.010059	FALSE
ACTA1_Y93_L96P	WHHTFYNEPRV	ACTA1_Y93	WHHTFYNELRV	L	3	P	1.79135	1.19039	1.73257	1.57143	0.331301	1.45631	1.54658	2.68523	1.89604	0.684949	0.6285	0.8655	-0.237	0.3386	0.522477	FALSE
ACTA2_Y145_R149C	AVLSLYASGCT	ACTA2_Y145	AVLSLYASGRT	R	4	C	0.243331	0.484577	0.408138	0.378682	0.123291	0.505496	0.70041	0.457947	0.554617	0.128479	-1.459	-0.8749	-0.5841	0.3514	0.17183	FALSE
ACTA2_Y145_Y145C	AVLSLCASGRT	ACTA2_Y145	AVLSLYASGRT	Y	0	C	0.359673	0.696151	0.408267	0.48803	0.181868	0.505496	0.70041	0.457947	0.554617	0.128479	-1.097	-0.8749	-0.2218	0.3457	0.556022	FALSE
ACTA2_Y190_R185Q	QDLTDYLMKIL	ACTA2_Y190	RDLTDYLMKIL	R	-5	Q	1.09835	0.910954	0.572434	0.860579	0.266552	1.04483	0.987033	1.42727	1.15304	0.239237	-0.268	0.1859	-0.4539	0.3248	0.234732	FALSE
ACTA2_Y200_T196S	LSERGYSFVTT	ACTA2_Y200	LTERGYSFVTT	T	-4	S	11.0876	6.50445	7.96143	8.51782	2.34168	8.75132	8.01101	6.63021	7.79751	1.07655	3.055	2.954	0.1016	0.2535	0.709047	FALSE
ACTA2_Y296_R292G	IGKDLYANNVL	ACTA2_Y296	IRKDLYANNVL	R	-4	G	0.388287	0.565489	0.65214	0.535305	0.134491	0.656965	0.51161	0.538464	0.569013	0.0773433	-0.9347	-0.822	-0.1126	0.2488	0.674192	FALSE
ACTB_Y188_R183W	WDLTDYLMKIL	ACTB_Y188	RDLTDYLMKIL	R	-5	W	1.10015	1.15965	1.69345	1.31775	0.326724	1.04483	0.987033	1.42727	1.15304	0.239237	0.3704	0.1859	0.1846	0.2564	0.511547	FALSE
ACTB_Y198_R196C	LTECGYSFTTT	ACTB_Y198	LTERGYSFTTT	R	-2	C	0.800906	0.649817	0.757793	0.736172	0.0778307	0.493655	0.798273	0.495375	0.595768	0.175377	-0.4474	-0.7856	0.3382	0.2473	0.243321	FALSE
ACTB_Y198_R196H	LTEHGYSFTTT	ACTB_Y198	LTERGYSFTTT	R	-2	H	1.98637	2.06871	1.59009	1.88173	0.255893	0.493655	0.798273	0.495375	0.595768	0.175377	0.9027	-0.7856	1.688	0.2588	0.00285	FALSE
ACTB_Y240_P243L	SLEKSYELLDG	ACTB_Y240	SLEKSYELLDG	P	3	L	5.69975	3.96826	4.39195	4.68665	0.902579	1.58232	1.29901	0.899419	1.26025	0.343098	2.211	0.2955	1.916	0.285	0.00255	TRUE
ACTB_Y69_L65V	IVTLKYPIEHG	ACTB_Y69	ILTLKYPIEHG	L	-4	V	0.662125	0.474978	0.211569	0.449557	0.226351	0.57729	0.563487	0.366116	0.502298	0.118138	-1.303	-1.023	-0.28	0.5333	0.627381	FALSE
ACTC1_Y168_P166A	HNVAIYEGYAL	ACTC1_Y168	HNVPIYEGYAL	P	-2	A	1.59991	2.52328	2.81936	2.31418	0.636046	3.14474	3.29643	2.46465	2.96861	0.442983	1.17	1.558	-0.3889	0.2819	0.239809	FALSE
ACTC1_Y168_Y168C	HNVPICEGYAL	ACTC1_Y168	HNVPIYEGYAL	Y	0	C	0.479067	0.728378	0.553588	0.587011	0.127972	3.14474	3.29643	2.46465	2.96861	0.442983	-0.7907	1.558	-2.349	0.2198	0.000434	TRUE
ACTC1_Y168_P166A_YF	HNVAIYEGFAL	ACTC1_Y168_YF	HNVPIYEGFAL	P	-2	A	0.521423	0.621854	0.38497	0.509416	0.118897	0.47673	0.468013	0.34693	0.430558	0.072555	-1.001	-1.23	0.2298	0.2508	0.411377	FALSE
ACTC1_Y168_Y168C_YF	HNVPICEGFAL	ACTC1_Y168_YF	HNVPIYEGFAL	Y	0	C	0.570733	0.742056	0.352267	0.555019	0.195369	0.47673	0.468013	0.34693	0.430558	0.072555	-0.9149	-1.23	0.3155	0.3481	0.415919	FALSE
ACTC1_Y171_P166A	AIYEGYALPHA	ACTC1_Y171	PIYEGYALPHA	P	-5	A	4.01983	2.05777	1.34917	2.47559	1.38349	2.61712	2.08174	1.64792	2.11559	0.485488	1.16	1.055	0.1046	0.4974	0.843673	FALSE
ACTC1_Y171_Y168C	PICEGYALPHA	ACTC1_Y171	PIYEGYALPHA	Y	-3	C	4.30957	3.78609	6.12064	4.73877	1.22502	2.61712	2.08174	1.64792	2.11559	0.485488	2.214	1.055	1.159	0.2828	0.014891	TRUE
ACTC1_Y171_P166A_YF	AIFEGYALPHA	ACTC1_Y171_YF	PIFEGYALPHA	P	-5	A	6.37084	6.69029	2.2703	5.11048	2.46485	6.29964	4.4505	3.09742	4.61585	1.60751	2.199	2.147	0.05204	0.5881	0.933737	FALSE
ACTC1_Y242_S241G	SLEKGYELPDG	ACTC1_Y242	SLEKSYELPDG	S	-1	G	6.50143	5.06823	4.05617	5.20861	1.22866	1.58232	1.29901	0.899419	1.26025	0.343098	2.354	0.2955	2.059	0.3093	0.002647	TRUE
ACTC1_Y296_A297S	IRKDLYSNNVL	ACTC1_Y296	IRKDLYANNVL	A	1	S	0.771848	0.448553	0.611337	0.61058	0.161649	0.656965	0.51161	0.538464	0.569013	0.0773433	-0.7467	-0.822	0.07528	0.2521	0.780074	FALSE
ACTC1_Y308_M307L	GGTTLYPGIAD	ACTC1_Y308	GGTTMYPGIAD	M	-1	L	0.515668	0.487833	0.355121	0.452874	0.0857931	0.449093	0.472347	0.257749	0.393063	0.117761	-1.162	-1.398	0.2361	0.3263	0.509373	FALSE
ACTC1_Y364_E363G	ISKQGYDEAGP	ACTC1_Y364	ISKQEYDEAGP	E	-1	G	1.56146	2.16598	0.537741	1.42173	0.823065	7.58227	5.54165	5.35418	6.15937	1.23583	0.2876	2.605	-2.317	0.6275	0.020976	TRUE
ACTC1_Y93_H90Y	WHYTFYNELRV	ACTC1_Y93	WHHTFYNELRV	H	-3	Y	0.411989	0.562734	0.739798	0.571507	0.164081	1.45631	1.54658	2.68523	1.89604	0.684949	-0.8479	0.8655	-1.713	0.3721	0.009993	FALSE
ACTC1_Y93_R97C	WHHTFYNELCV	ACTC1_Y93	WHHTFYNELRV	R	4	C	0.622999	0.900003	2.09044	1.20448	0.779666	1.45631	1.54658	2.68523	1.89604	0.684949	0.07637	0.8655	-0.7891	0.5883	0.250925	FALSE
ACTC1_Y93_H90Y_YF	WHFTFYNELRV	ACTC1_Y93	WHHTFYNELRV	H	-3	F	0.402793	0.687181	0.513723	0.534565	0.143335	1.45631	1.54658	2.68523	1.89604	0.684949	-0.938	0.8655	-1.804	0.3585	0.007331	FALSE
ACTG1_Y188_D187H	RDLTHYLMKIL	ACTG1_Y188	RDLTDYLMKIL	D	-1	H	1.04881	0.966375	2.77715	1.59744	1.02249	1.04483	0.987033	1.42727	1.15304	0.239237	0.4977	0.1859	0.3118	0.5164	0.578556	FALSE
ACTG1_Y198_T203K	LTERGYSFTTK	ACTG1_Y198	LTERGYSFTTT	T	5	K	0.469507	0.614414	0.278266	0.454062	0.168605	0.493655	0.798273	0.495375	0.595768	0.175377	-1.213	-0.7856	-0.4274	0.4069	0.352881	FALSE
ACTG1_Y240_E241K	SLEKSYKLPDG	ACTG1_Y240	SLEKSYELPDG	E	1	K	0.695231	0.45908	0.253421	0.469244	0.22108	1.58232	1.29901	0.899419	1.26025	0.343098	-1.209	0.2955	-1.505	0.4853	0.036195	FALSE
ACTG1_Y69_P70L	ILTLKYLIEHG	ACTG1_Y69	ILTLKYPIEHG	P	1	L	0.847082	0.925358	0.866061	0.8795	0.0408318	0.57729	0.563487	0.366116	0.502298	0.118138	-0.1863	-1.023	0.837	0.2168	0.018144	FALSE
ACTG1_Y91_T89I	WHHIFYNELRV	ACTG1_Y91	WHHTFYNELRV	T	-2	I	0.314509	0.5864	0.635053	0.511987	0.172742	1.45631	1.54658	2.68523	1.89604	0.684949	-1.031	0.8655	-1.897	0.4262	0.011239	FALSE
ACTG2_Y144_R148S	AVLSLYASGST	ACTG2_Y144	AVLSLYASGRT	R	4	S	0.67309	0.769383	0.391937	0.61147	0.196123	0.505496	0.70041	0.457947	0.554617	0.128479	-0.7669	-0.8749	0.108	0.3504	0.773281	FALSE
ACTG2_Y199_G198D	LTERDYSFVTT	ACTG2_Y199	LTERGYSFVTT	G	-1	D	1.22794	0.464603	0.340734	0.677759	0.480479	8.75132	8.01101	6.63021	7.79751	1.07655	-0.7877	2.954	-3.741	0.5695	0.002779	TRUE
ACTL6A_Y69_P66S	GGSTYYIDTNA	ACTL6A_Y69	GGPTYYIDTNA	P	-3	S	0.834678	0.821614	0.537411	0.731235	0.167983	0.688193	0.718282	0.631219	0.679231	0.044218	-0.48	-0.5601	0.08007	0.2151	0.728652	FALSE
ACTL6A_Y69_P66S_YF	GGSTFYIDTNA	ACTL6A_Y69_YF	GGPTFYIDTNA	P	-3	S	0.544834	0.77277	0.369312	0.562306	0.202296	0.803897	0.56233	0.365383	0.577204	0.219635	-0.895	-0.866	-0.02905	0.4503	0.951666	FALSE
ACTN1_Y193_R197W	PELIDYGKLWK	ACTN1_Y193	PELIDYGKLRK	R	4	W	0.608811	0.685754	0.318019	0.537528	0.193954	0.729689	0.479836	0.225263	0.478263	0.252216	-0.971	-1.221	0.2505	0.604	0.699678	FALSE
ACTN1_Y708_N707T	NKHTTYTMEHI	ACTN1_Y708	NKHTNYTMEHI	N	-1	T	0.470109	0.755355	0.470668	0.565377	0.164526	0.377828	0.688706	0.307316	0.45795	0.202927	-0.8603	-1.215	0.3545	0.4169	0.443018	FALSE
ACTN2_Y599_M604V	SSSNPYSTVTV	ACTN2_Y599	SSSNPYSTVTM	M	5	V	3.61215	3.95541	2.49115	3.3529	0.765781	3.89809	3.7366	2.62208	3.41892	0.694797	1.718	1.752	-0.0339	0.273	0.907157	FALSE
ACTN4_Y260_K255E	EAIMTYVSSFY	ACTN4_Y260	KAIMTYVSSFY	K	-5	E	0.294752	0.85122	0.284543	0.476838	0.324264	0.526997	0.700281	0.464718	0.563999	0.122063	-1.269	-0.8479	-0.4215	0.5474	0.484291	FALSE
ACTN4_Y260_S262F	KAIMTYVFSFY	ACTN4_Y260	KAIMTYVSSFY	S	2	F	0.492489	0.695887	0.495858	0.561412	0.116472	0.526997	0.700281	0.464718	0.563999	0.122063	-0.8523	-0.8479	-0.004403	0.2403	0.986256	FALSE
ACTN4_Y260_S262P	KAIMTYVPSFY	ACTN4_Y260	KAIMTYVSSFY	S	2	P	1.33141	1.46098	0.656891	1.14976	0.431726	0.526997	0.700281	0.464718	0.563999	0.122063	0.1179	-0.8479	0.9658	0.404	0.075121	FALSE
ACTN4_Y260_T259I	KAIMIYVSSFY	ACTN4_Y260	KAIMTYVSSFY	T	-1	I	0.449548	0.423718	0.555907	0.476391	0.0700633	0.526997	0.700281	0.464718	0.563999	0.122063	-1.08	-0.8479	-0.2319	0.2116	0.334623	FALSE
ACTN4_Y260_K255E_YF	EAIMTYVSSFF	ACTN4_Y260_YF	KAIMTYVSSFF	K	-5	E	0.462649	0.736816	0.279236	0.4929	0.230285	0.838691	0.962043	0.229089	0.676608	0.392439	-1.131	-0.8119	-0.3191	0.7736	0.701074	FALSE
ACTN4_Y260_S262F_YF	KAIMTYVFSFF	ACTN4_Y260_YF	KAIMTYVSSFF	S	2	F	0.681043	1.0118	0.972057	0.888301	0.180588	0.838691	0.962043	0.229089	0.676608	0.392439	-0.1927	-0.8119	0.6192	0.6841	0.41659	FALSE
ACTN4_Y260_S262P_YF	KAIMTYVPSFF	ACTN4_Y260_YF	KAIMTYVSSFF	S	2	P	0.878527	1.21613	0.81522	0.969957	0.215525	0.838691	0.962043	0.229089	0.676608	0.392439	-0.06643	-0.8119	0.7454	0.6829	0.336367	FALSE
ACTN4_Y260_T259I_YF	KAIMIYVSSFF	ACTN4_Y260_YF	KAIMTYVSSFF	T	-1	I	0.430847	0.697793	0.573723	0.567454	0.133583	0.838691	0.962043	0.229089	0.676608	0.392439	-0.8452	-0.8119	-0.03327	0.6898	0.963839	FALSE
ACTN4_Y265_S262F	YVFSFYHAFSG	ACTN4_Y265	YVSSFYHAFSG	S	-3	F	0.631886	0.787093	1.24761	0.888864	0.320231	1.93597	2.22804	2.42646	2.19682	0.246728	-0.2295	1.129	-1.359	0.3044	0.011127	TRUE
ACTN4_Y265_S262P	YVPSFYHAFSG	ACTN4_Y265	YVSSFYHAFSG	S	-3	P	0.898187	0.819476	1.27355	0.997072	0.242653	1.93597	2.22804	2.42646	2.19682	0.246728	-0.03109	1.129	-1.16	0.2158	0.005781	TRUE
ACTN4_Y265_S262F_YF	FVFSFYHAFSG	ACTN4_Y265_YF	FVSSFYHAFSG	S	-3	F	0.502436	1.12953	1.48043	1.03747	0.495455	1.10845	0.62146	1.12119	0.950365	0.284912	-0.08375	-0.1242	0.04048	0.5462	0.944479	FALSE
ACTN4_Y265_S262P_YF	FVPSFYHAFSG	ACTN4_Y265_YF	FVSSFYHAFSG	S	-3	P	0.928369	0.859733	0.97366	0.920587	0.0573607	1.10845	0.62146	1.12119	0.950365	0.284912	-0.1213	-0.1242	0.002972	0.2859	0.992202	FALSE
ACVRL1_Y375_E379D	VGTKRYMAPDV	ACVRL1_Y375	VGTKRYMAPEV	E	4	D	0.439957	0.871872	0.176677	0.496169	0.35099	0.489571	0.622352	0.420318	0.510747	0.102668	-1.294	-0.9884	-0.306	0.6871	0.67908	FALSE
ACVRL1_Y375_E379K	VGTKRYMAPKV	ACVRL1_Y375	VGTKRYMAPEV	E	4	K	0.503215	0.736295	0.656461	0.63199	0.118451	0.489571	0.622352	0.420318	0.510747	0.102668	-0.6799	-0.9884	0.3085	0.2315	0.253592	FALSE
ACVRL1_Y375_M376R	VGTKRYRAPEV	ACVRL1_Y375	VGTKRYMAPEV	M	1	R	0.503588	0.594942	0.484292	0.527607	0.0591059	0.489571	0.622352	0.420318	0.510747	0.102668	-0.9283	-0.9884	0.06005	0.1883	0.765744	FALSE
ACVRL1_Y375_M376V	VGTKRYVAPEV	ACVRL1_Y375	VGTKRYMAPEV	M	1	V	0.348026	0.483187	0.232237	0.354484	0.1256	0.489571	0.622352	0.420318	0.510747	0.102668	-1.559	-0.9884	-0.5711	0.3473	0.175404	FALSE
ACVRL1_Y375_P378L	VGTKRYMALEV	ACVRL1_Y375	VGTKRYMAPEV	P	3	L	0.939894	0.619173	0.880313	0.813127	0.17059	0.489571	0.622352	0.420318	0.510747	0.102668	-0.3216	-0.9884	0.6667	0.2492	0.055518	FALSE
ACVRL1_Y375_P378S	VGTKRYMASEV	ACVRL1_Y375	VGTKRYMAPEV	P	3	S	0.564911	0.49307	0.291144	0.449708	0.141941	0.489571	0.622352	0.420318	0.510747	0.102668	-1.208	-0.9884	-0.2197	0.335	0.547656	FALSE
ACVRL1_Y375_R374Q	VGTKQYMAPEV	ACVRL1_Y375	VGTKRYMAPEV	R	-1	Q	0.752361	0.421027	0.280254	0.484547	0.242379	0.489571	0.622352	0.420318	0.510747	0.102668	-1.165	-0.9884	-0.1762	0.445	0.712335	FALSE
ACVRL1_Y375_R374W	VGTKWYMAPEV	ACVRL1_Y375	VGTKRYMAPEV	R	-1	W	0.812405	0.806418	0.592959	0.737261	0.125005	0.489571	0.622352	0.420318	0.510747	0.102668	-0.4547	-0.9884	0.5336	0.2226	0.0746	FALSE
ACVRL1_Y421_F425L	GIVEDYRPPLY	ACVRL1_Y421	GIVEDYRPPFY	F	4	L	0.350698	0.579825	0.355603	0.428708	0.130894	0.554182	0.584393	0.260579	0.466384	0.178872	-1.263	-1.189	-0.0743	0.4455	0.875638	FALSE
ACVRL1_Y421_F425V	GIVEDYRPPVY	ACVRL1_Y421	GIVEDYRPPFY	F	4	V	0.813028	0.219027	0.378022	0.470026	0.307502	0.554182	0.584393	0.260579	0.466384	0.178872	-1.298	-1.189	-0.1087	0.6654	0.878145	FALSE
ACVRL1_Y421_G416S	SIVEDYRPPFY	ACVRL1_Y421	GIVEDYRPPFY	G	-5	S	0.558332	0.535223	0.292058	0.461871	0.147516	0.554182	0.584393	0.260579	0.466384	0.178872	-1.173	-1.189	0.01617	0.4825	0.974875	FALSE
ACVRL1_Y421_I417F	GFVEDYRPPFY	ACVRL1_Y421	GIVEDYRPPFY	I	-4	F	0.650855	0.586867	0.641251	0.626324	0.0345065	0.554182	0.584393	0.260579	0.466384	0.178872	-0.6765	-1.189	0.5124	0.3792	0.247936	FALSE
ACVRL1_Y421_P424R	GIVEDYRPRFY	ACVRL1_Y421	GIVEDYRPPFY	P	3	R	0.481856	0.767635	0.193956	0.481149	0.28684	0.554182	0.584393	0.260579	0.466384	0.178872	-1.267	-1.189	-0.07809	0.6937	0.915801	FALSE
ACVRL1_Y421_P424T	GIVEDYRPTFY	ACVRL1_Y421	GIVEDYRPPFY	P	3	T	0.650956	1.1735	0.465393	0.763283	0.367173	0.554182	0.584393	0.260579	0.466384	0.178872	-0.4973	-1.189	0.6916	0.5419	0.270962	FALSE
ACVRL1_Y421_Y426C	GIVEDYRPPFC	ACVRL1_Y421	GIVEDYRPPFY	Y	5	C	0.5297	0.876268	0.300186	0.568718	0.290016	0.554182	0.584393	0.260579	0.466384	0.178872	-0.9478	-1.189	0.2411	0.5839	0.700791	FALSE
ACVRL1_Y421_F425L_YF	GIVEDYRPPLF	ACVRL1_Y421_YF	GIVEDYRPPFF	F	4	L	0.480912	0.393546	0.172958	0.349138	0.158707	0.696177	0.581916	0.284247	0.52078	0.212661	-1.644	-1.039	-0.6049	0.5997	0.370168	FALSE
ACVRL1_Y421_F425V_YF	GIVEDYRPPVF	ACVRL1_Y421_YF	GIVEDYRPPFF	F	4	V	0.41221	0.378589	0.267136	0.352645	0.0759372	0.696177	0.581916	0.284247	0.52078	0.212661	-1.528	-1.039	-0.4886	0.4388	0.32785	FALSE
ACVRL1_Y421_G416S_YF	SIVEDYRPPFF	ACVRL1_Y421_YF	GIVEDYRPPFF	G	-5	S	0.517207	0.495717	0.318019	0.443648	0.109327	0.696177	0.581916	0.284247	0.52078	0.212661	-1.205	-1.039	-0.166	0.4541	0.733181	FALSE
ACVRL1_Y421_I417F_YF	GFVEDYRPPFF	ACVRL1_Y421_YF	GIVEDYRPPFF	I	-4	F	0.390305	0.604973	0.197687	0.397655	0.203742	0.696177	0.581916	0.284247	0.52078	0.212661	-1.474	-1.039	-0.4342	0.6134	0.518049	FALSE
ACVRL1_Y421_P424R_YF	GIVEDYRPRFF	ACVRL1_Y421_YF	GIVEDYRPPFF	P	3	R	0.316668	0.828006	0.259194	0.467956	0.313133	0.696177	0.581916	0.284247	0.52078	0.212661	-1.293	-1.039	-0.2536	0.6506	0.716574	FALSE
ACVRL1_Y421_P424T_YF	GIVEDYRPTFF	ACVRL1_Y421_YF	GIVEDYRPPFF	P	3	T	0.40879	0.608208	0.323598	0.446865	0.146075	0.696177	0.581916	0.284247	0.52078	0.212661	-1.212	-1.039	-0.1724	0.4759	0.735439	FALSE
ADA_Y290_S291L	NDQANYLLNTD	ADA_Y290	NDQANYSLNTD	S	1	L	0.688237	0.559173	0.334189	0.5272	0.179176	0.77288	0.657494	0.231621	0.553998	0.285086	-0.9863	-1.029	0.04263	0.6267	0.949037	FALSE
ADA_Y308_L304R	TRDTDYQMTKR	ADA_Y308	TLDTDYQMTKR	L	-4	R	0.580632	0.653099	0.398149	0.54396	0.131372	0.617304	0.738284	0.318019	0.557869	0.216345	-0.9092	-0.9288	0.01966	0.4278	0.96555	FALSE
ADA_Y84_A83D	IKRIDYEFVEM	ADA_Y84	IKRIAYEFVEM	A	-1	D	0.560859	0.623413	0.315826	0.500032	0.162565	1.14554	1.02437	0.747953	0.97262	0.203782	-1.06	-0.06274	-0.9969	0.3561	0.048833	FALSE
ADA_Y84_K80R	IRRIAYEFVEM	ADA_Y84	IKRIAYEFVEM	K	-4	R	1.37391	1.00042	1.07239	1.1489	0.198154	1.14554	1.02437	0.747953	0.97262	0.203782	0.1866	-0.06274	0.2493	0.2306	0.340512	FALSE
ADA2_Y337_H335R	HSLRDYKEALM	ADA2_Y337	HSLHDYKEALM	H	-2	R	0.507363	0.433348	0.459682	0.466798	0.0375171	0.463487	0.381092	0.408881	0.41782	0.0419186	-1.102	-1.264	0.1616	0.1059	0.201843	FALSE
ADAM12_Y895_P893S	RPASQYPHQVP	ADAM12_Y895	RPAPQYPHQVP	P	-2	S	0.627276	0.530145	0.431597	0.529673	0.0978405	0.519513	0.799118	0.620894	0.646508	0.141551	-0.9335	-0.652	-0.2816	0.2383	0.302885	FALSE
ADAMTS18_Y764_L769I	HKANEYYPVVI	ADAMTS18_Y764	HKANEYYPVVL	L	5	I	0.603858	0.919914	0.238514	0.587429	0.340997	1.02523	0.89674	1.0343	0.985423	0.0769357	-0.972	-0.02421	-0.9478	0.5791	0.177062	FALSE
ADAMTS18_Y764_L769I_YF	HKANEYFPVVI	ADAMTS18_Y764_YF	HKANEYFPVVL	L	5	I	0.67145	0.393546	0.389829	0.484942	0.161532	0.553777	0.533799	0.297165	0.461581	0.142738	-1.093	-1.17	0.0766	0.3897	0.853743	FALSE
ADAMTS18_Y765_L769I	KANEYYPVVII	ADAMTS18_Y765	KANEYYPVVLI	L	4	I	0.380948	0.44744	0.319585	0.382658	0.0639442	0.362142	0.581555	0.267492	0.40373	0.161109	-1.399	-1.383	-0.01616	0.3549	0.965865	FALSE
ADAMTS18_Y765_L769I_YF	KANEFYPVVII	ADAMTS18_Y765_YF	KANEFYPVVLI	L	4	I	0.31782	0.379545	0.348438	0.348601	0.0308629	0.393418	0.485484	0.284011	0.387638	0.100861	-1.524	-1.401	-0.1227	0.2368	0.631793	FALSE
ADAMTS9_Y100_S96P	SPQAHYRLSAF	ADAMTS9_Y100	SSQAHYRLSAF	S	-4	P	0.498277	0.712085	0.232237	0.480866	0.240397	0.486662	0.462527	0.341916	0.430368	0.0775465	-1.2	-1.233	0.03283	0.5025	0.951044	FALSE
ADAMTS9_Y100_S96T	STQAHYRLSAF	ADAMTS9_Y100	SSQAHYRLSAF	S	-4	T	0.541419	0.654125	0.342396	0.512647	0.157843	0.486662	0.462527	0.341916	0.430368	0.0775465	-1.015	-1.233	0.2186	0.3196	0.531485	FALSE
ADAMTSL2_Y594_R593C	AMCVCYDGVEV	ADAMTSL2_Y594	AMCVRYDGVEV	R	-1	C	0.612699	0.767695	1.06449	0.814962	0.229576	0.715095	0.68548	1.17593	0.858835	0.275011	-0.3327	-0.2649	-0.06772	0.3406	0.852088	FALSE
ADAR_Y587_Y587C	EESSHCSTEKE	ADAR_Y587	EESSHYSTEKE	Y	0	C	0.463081	0.933662	0.289907	0.562216	0.333131	0.769192	0.601813	0.274549	0.548518	0.251591	-0.9987	-0.992	-0.006656	0.6643	0.992486	FALSE
ADCY10_Y318_A313T	TIQDAYMHITS	ADCY10_Y318	AIQDAYMHITS	A	-5	T	0.914159	1.22909	1.63215	1.25846	0.359894	1.66725	1.08151	1.06285	1.27054	0.34369	0.2916	0.3128	-0.0212	0.3216	0.950611	FALSE
ADD2_Y31_D28N	EDNPEYMRLRN	ADD2_Y31	EDDPEYMRLRN	D	-3	N	0.477804	0.830518	0.223996	0.510773	0.304602	0.483639	0.73175	0.301281	0.505557	0.21607	-1.164	-1.076	-0.0875	0.6611	0.901098	FALSE
ADD2_Y440_T439A	NTPNAYLRVNV	ADD2_Y440	NTPNTYLRVNV	T	-1	A	0.414301	0.728925	0.354364	0.499196	0.201195	0.624593	0.533415	0.298143	0.485383	0.168442	-1.075	-1.111	0.03583	0.4529	0.940737	FALSE
ADGRA2_Y377_T375K	AGIKAYQSCLQ	ADGRA2_Y377	AGITAYQSCLQ	T	-2	K	0.521722	0.651525	0.538186	0.570478	0.0706701	0.216695	0.447181	0.520394	0.394757	0.158491	-0.8169	-1.437	0.6197	0.4027	0.198647	FALSE
ADGRD1_Y183_E178K	KGLKVYVNGTL	ADGRD1_Y183	EGLKVYVNGTL	E	-5	K	0.670953	0.534172	0.443256	0.54946	0.114616	0.593575	0.642231	0.271447	0.502418	0.2015	-0.8847	-1.091	0.2062	0.4326	0.658566	FALSE
ADGRD1_Y183_V184I	EGLKVYINGTL	ADGRD1_Y183	EGLKVYVNGTL	V	1	I	0.332051	0.388276	0.422683	0.381003	0.0457518	0.593575	0.642231	0.271447	0.502418	0.2015	-1.399	-1.091	-0.3084	0.4095	0.493268	FALSE
ADGRD1_Y571_I569V	LSSVSYVGCSL	ADGRD1_Y571	LSSISYVGCSL	I	-2	V	0.342268	0.864162	0.350917	0.519116	0.29885	0.69996	0.583822	0.4174	0.567061	0.142024	-1.089	-0.8505	-0.2389	0.4908	0.651922	FALSE
ADGRD1_Y571_S567L	LLSISYVGCSL	ADGRD1_Y571	LSSISYVGCSL	S	-4	L	0.58267	0.459957	0.578216	0.540281	0.069598	0.69996	0.583822	0.4174	0.567061	0.142024	-0.8967	-0.8505	-0.04615	0.2455	0.860031	FALSE
ADGRD1_Y85_T82M	GVMLLYYGRYN	ADGRD1_Y85	GVTLLYYGRYN	T	-3	M	0.840834	0.911552	1.12677	0.95972	0.148931	0.870462	0.798273	1.4813	1.05001	0.375245	-0.0705	0.01389	-0.08439	0.3059	0.796329	FALSE
ADGRD1_Y85_Y85C	GVTLLCYGRYN	ADGRD1_Y85	GVTLLYYGRYN	Y	0	C	0.385051	0.391339	0.682464	0.486284	0.169925	0.870462	0.798273	1.4813	1.05001	0.375245	-1.094	0.01389	-1.108	0.3891	0.046547	FALSE
ADGRD1_Y85_Y89D	GVTLLYYGRDN	ADGRD1_Y85	GVTLLYYGRYN	Y	4	D	0.709419	0.670258	1.04027	0.806648	0.203265	0.870462	0.798273	1.4813	1.05001	0.375245	-0.3385	0.01389	-0.3524	0.3426	0.361839	FALSE
ADGRD1_Y85_T82M_YF	GVMLLYFGRFN	ADGRD1_Y85_YF	GVTLLYFGRFN	T	-3	M	0.692027	0.468688	1.07609	0.7456	0.307223	0.595912	0.907459	1.44062	0.981332	0.427174	-0.5062	-0.1201	-0.3861	0.5052	0.487286	FALSE
ADGRD1_Y85_Y85C_YF	GVTLLCFGRFN	ADGRD1_Y85_YF	GVTLLYFGRFN	Y	0	C	0.40316	0.518884	0.473645	0.46523	0.0583188	0.595912	0.907459	1.44062	0.981332	0.427174	-1.112	-0.1201	-0.9917	0.3829	0.060675	FALSE
ADGRD1_Y85_Y89D_YF	GVTLLYFGRDN	ADGRD1_Y85_YF	GVTLLYFGRFN	F	4	D	0.981503	0.85991	1.6493	1.16357	0.425024	0.595912	0.907459	1.44062	0.981332	0.427174	0.1591	-0.1201	0.2791	0.4663	0.58171	FALSE
ADGRE1_Y534_I539V	SDPIIYTLENV	ADGRE1_Y534	SDPIIYTLENI	I	5	V	0.812921	0.53474	0.31568	0.554447	0.249205	0.614652	0.608752	0.333832	0.519079	0.160456	-0.9551	-1	0.04522	0.4906	0.930987	FALSE
ADGRE2_Y670_S665F	FRPHLYGTPSR	ADGRE2_Y670	SRPHLYGTPSR	S	-5	F	1.02292	0.899007	3.40305	1.77499	1.4113	0.699549	0.921126	1.65589	1.09219	0.500594	0.5486	0.03119	0.5175	0.7129	0.508145	FALSE
ADGRG2_Y285_H290Q	AEPPDYSPVTQ	ADGRG2_Y285	AEPPDYSPVTH	H	5	Q	0.423443	0.595916	0.303313	0.440891	0.14708	0.601932	0.637936	0.190811	0.476893	0.248407	-1.236	-1.257	0.02097	0.6329	0.97515	FALSE
ADGRG7_Y760_R756H	LHVKMYNFLRS	ADGRG7_Y760	LRVKMYNFLRS	R	-4	H	1.15571	0.728378	0.596285	0.826791	0.292408	0.96481	1.34885	1.00022	1.10463	0.212242	-0.3315	0.1268	-0.4583	0.3215	0.227225	FALSE
ADGRL4_Y301_V300L	AVAFLYYKSIG	ADGRL4_Y301	AVAFVYYKSIG	V	-1	L	0.326121	0.412641	0.642951	0.460571	0.163763	0.914656	0.514161	0.851554	0.760124	0.215334	-1.177	-0.4401	-0.7368	0.3883	0.130632	FALSE
ADGRL4_Y301_V300L_YF	AVAFLYFKSIG	ADGRL4_Y301_YF	AVAFVYFKSIG	V	-1	L	0.51576	0.224369	0.967686	0.569272	0.374536	0.449488	0.582581	0.852219	0.628096	0.205187	-1.053	-0.7213	-0.3316	0.6669	0.645102	FALSE
ADGRL4_Y302_V300L	VAFLYYKSIGP	ADGRL4_Y302	VAFVYYKSIGP	V	-2	L	0.351571	0.407042	0.265016	0.341209	0.0715778	0.786006	0.516006	0.420432	0.574148	0.189596	-1.574	-0.8507	-0.7229	0.3219	0.088048	FALSE
ADGRL4_Y302_V300L_YF	VAFLFYKSIGP	ADGRL4_Y302_YF	VAFVFYKSIGP	V	-2	L	0.190692	0.179204	0.532496	0.300798	0.200739	0.457468	0.673675	0.526376	0.552506	0.110446	-1.927	-0.8747	-1.052	0.5349	0.120628	FALSE
ADM_Y52_S50R	RMSRSYPTGLA	ADM_Y52	RMSSSYPTGLA	S	-2	R	0.394147	0.634183	0.246554	0.424961	0.195643	0.314124	0.501771	0.451008	0.422301	0.0970615	-1.34	-1.271	-0.06866	0.4434	0.884443	FALSE
ADPRS_Y75_T79P	TEALYYTDDPA	ADPRS_Y75	TEALYYTDDTA	T	4	P	0.550073	1.12899	0.710467	0.796509	0.298894	0.627276	0.696905	1.24442	0.856201	0.338006	-0.3935	-0.2928	-0.1007	0.4319	0.82709	FALSE
ADPRS_Y75_T79P_YF	TEALFYTDDPA	ADPRS_Y75_YF	TEALFYTDDTA	T	4	P	0.504773	0.619173	0.754572	0.626173	0.125046	0.620742	0.611402	0.612824	0.61499	0.00503223	-0.6947	-0.7014	0.006682	0.1676	0.970106	FALSE
ADRB2_Y219_S220C	IMVFVYCRVFQ	ADRB2_Y219	IMVFVYSRVFQ	S	1	C	0.658341	1.12419	0.521551	0.768026	0.315937	0.481801	0.712085	0.578957	0.590948	0.115609	-0.4578	-0.7773	0.3195	0.3662	0.432166	FALSE
ADSL_Y432_D430N	IQVNAYFSPIH	ADSL_Y432	IQVDAYFSPIH	D	-2	N	0.713853	1.04057	1.12403	0.959485	0.216778	0.625796	0.634424	0.551232	0.603817	0.0457437	-0.08675	-0.7307	0.6439	0.2124	0.038715	FALSE
AFG3L2_Y614_Y616C	LPKEQYLCTKE	AFG3L2_Y614	LPKEQYLYTKE	Y	2	C	0.322426	0.871722	0.557653	0.583933	0.275589	0.712355	0.614916	0.463399	0.59689	0.125453	-0.8912	-0.7668	-0.1243	0.4531	0.797344	FALSE
AGXT_Y194_G190R	GRTPLYMDRQG	AGXT_Y194	GGTPLYMDRQG	G	-4	R	0.59007	0.689302	0.347401	0.542258	0.175894	0.425298	0.564581	0.355504	0.448461	0.106446	-0.9411	-1.183	0.2424	0.3567	0.534178	FALSE
AGXT_Y194_M195R	GGTPLYRDRQG	AGXT_Y194	GGTPLYMDRQG	M	1	R	0.448054	0.535015	0.182692	0.388587	0.183535	0.425298	0.564581	0.355504	0.448461	0.106446	-1.504	-1.183	-0.321	0.5176	0.568804	FALSE
AGXT_Y231_R233C	AKKKMYSCKTK	AGXT_Y231	AKKKMYSRKTK	R	2	C	0.622238	0.614916	2.36498	1.20071	1.0083	0.79455	0.32655	0.106748	0.409282	0.351285	-0.04806	-1.725	1.677	1.057	0.187969	FALSE
AGXT_Y231_R233H	AKKKMYSHKTK	AGXT_Y231	AKKKMYSRKTK	R	2	H	0.748355	0.826562	2.4431	1.33934	0.956683	0.79455	0.32655	0.106748	0.409282	0.351285	0.1986	-1.725	1.923	1	0.126892	FALSE
AGXT_Y231_R233L	AKKKMYSLKTK	AGXT_Y231	AKKKMYSRKTK	R	2	L	0.960851	0.780533	2.87891	1.5401	1.16294	0.79455	0.32655	0.106748	0.409282	0.351285	0.3701	-1.725	2.095	1.021	0.109552	FALSE
AGXT_Y297_A295T	REATAYLHGRL	AGXT_Y297	REAAAYLHGRL	A	-2	T	0.444264	0.521644	0.481847	0.482585	0.0386949	0.431988	0.763111	0.477028	0.557376	0.179589	-1.054	-0.8896	-0.1646	0.2619	0.563656	FALSE
AGXT_Y297_L298P	REAAAYPHGRL	AGXT_Y297	REAAAYLHGRL	L	1	P	0.325478	0.724781	0.599973	0.550078	0.204274	0.431988	0.763111	0.477028	0.557376	0.179589	-0.9403	-0.8896	-0.05065	0.4308	0.912072	FALSE
AHCY_Y143_Y143C	LIHTKCPQLLP	AHCY_Y143	LIHTKYPQLLP	Y	0	C	0.698656	0.782906	0.658964	0.713509	0.0632916	0.659626	0.34738	0.252882	0.419963	0.212865	-0.4907	-1.37	0.879	0.4133	0.100576	FALSE
AHNAK_Y964_G962V	KVKVEYDMTVP	AHNAK_Y964	KVKGEYDMTVP	G	-2	V	0.706266	0.879172	0.785109	0.790182	0.0865645	0.422328	0.640399	0.434367	0.499031	0.122576	-0.3455	-1.03	0.6843	0.2142	0.03306	FALSE
AHSG_Y314_R317C	LHRAHYDLCHT	AHSG_Y314	LHRAHYDLRHT	R	3	C	2.06975	2.00873	2.683	2.25383	0.372928	0.662125	0.669029	2.24484	1.192	0.911794	1.16	-0.002691	1.163	0.5995	0.124496	FALSE
AHSG_Y314_R317H	LHRAHYDLHHT	AHSG_Y314	LHRAHYDLRHT	R	3	H	0.669094	0.99711	3.91741	1.86121	1.78826	0.662125	0.669029	2.24484	1.192	0.911794	0.462	-0.002691	0.4647	0.9684	0.656402	FALSE
AICDA_Y146_F151S	FKDYFYCWNTS	AICDA_Y146	FKDYFYCWNTF	F	5	S	0.338419	0.428865	0.359174	0.375486	0.0473777	0.404008	0.569913	0.44658	0.4735	0.0861665	-1.421	-1.094	-0.3267	0.1796	0.143065	FALSE
AICDA_Y146_F151S_YF	FKDFFYCWNTS	AICDA_Y146_YF	FKDFFYCWNTF	F	5	S	0.534266	0.625792	0.610077	0.590045	0.0489408	0.401132	0.390674	0.477028	0.422945	0.0471287	-0.7645	-1.247	0.4827	0.1147	0.013621	FALSE
AIFM1_Y347_L344F	KIFPEYLSNWT	AIFM1_Y347	KILPEYLSNWT	L	-3	F	0.624981	0.836286	0.42175	0.627672	0.207281	0.654849	0.660712	0.758908	0.69149	0.0584598	-0.7272	-0.5356	-0.1916	0.2943	0.550489	FALSE
AIPL1_Y267_R270H	GIVKAYYVHAR	AIPL1_Y267	GIVKAYYVRAR	R	3	H	0.761785	0.979169	1.20438	0.981777	0.221308	0.675367	0.440745	0.275967	0.464026	0.200716	-0.05154	-1.202	1.15	0.419	0.051602	FALSE
AIPL1_Y267_R270H_YF	GIVKAYFVHAR	AIPL1_Y267_YF	GIVKAYFVRAR	R	3	H	0.73062	0.999698	1.31122	1.01384	0.290556	0.864657	0.431631	0.222177	0.506155	0.327659	-0.02078	-1.197	1.177	0.6162	0.128845	FALSE
AIPL1_Y268_R270H	IVKAYYVHARA	AIPL1_Y268	IVKAYYVRARA	R	2	H	0.904434	0.521842	1.04212	0.8228	0.269576	0.821332	0.387332	0.355304	0.521323	0.260309	-0.3412	-1.048	0.7072	0.4899	0.222361	FALSE
AIPL1_Y268_R270H_YF	IVKAFYVHARA	AIPL1_Y268_YF	IVKAFYVRARA	R	2	H	0.915151	0.484868	0.942562	0.78086	0.256703	0.675161	0.590854	0.536657	0.600891	0.0697957	-0.4192	-0.7413	0.3221	0.3272	0.380737	FALSE
AK7_Y390_N389K	KELAKYYKLHH	AK7_Y390	KELANYYKLHH	N	-1	K	0.762447	0.558695	1.02344	0.781528	0.23296	0.790208	0.688961	0.612697	0.697288	0.0890482	-0.3992	-0.528	0.1287	0.2735	0.662397	FALSE
AK7_Y390_N389K_YF	KELAKYFKLHH	AK7_Y390_YF	KELANYFKLHH	N	-1	K	0.502051	0.567896	0.421484	0.497144	0.0733296	0.527292	0.550725	0.470403	0.51614	0.041306	-1.019	-0.9573	-0.06163	0.142	0.686723	FALSE
AK7_Y391_N389K	ELAKYYKLHHI	AK7_Y391	ELANYYKLHHI	N	-2	K	0.626687	0.603984	1.01422	0.748298	0.230577	0.627276	0.484577	0.308867	0.473573	0.159489	-0.4604	-1.138	0.6772	0.3837	0.152312	FALSE
AK7_Y391_N389K_YF	ELAKFYKLHHI	AK7_Y391_YF	ELANFYKLHHI	N	-2	K	0.467066	0.449864	0.324895	0.413942	0.0775951	0.644003	0.513862	0.284187	0.480684	0.182188	-1.291	-1.137	-0.1541	0.3892	0.712431	FALSE
AKAP4_Y554_T557I	LKLIQYHLIQQ	AKAP4_Y554	LKLIQYHLTQQ	T	3	I	1.9522	2.28039	2.41393	2.2155	0.237603	0.945893	0.288374	1.05275	0.76234	0.413929	1.142	-0.6	1.742	0.6056	0.045177	TRUE
AKR1A1_Y50_E55D	DCAAIYGNEPD	AKR1A1_Y50	DCAAIYGNEPE	E	5	D	0.883734	1.13944	0.923526	0.982233	0.137591	0.612194	0.931861	0.615011	0.719689	0.183752	-0.03492	-0.5037	0.4688	0.2306	0.111853	FALSE
AKR1A1_Y50_N52S	DCAAIYGSEPE	AKR1A1_Y50	DCAAIYGNEPE	N	2	S	0.70216	0.64376	0.554194	0.633371	0.0745279	0.612194	0.931861	0.615011	0.719689	0.183752	-0.6657	-0.5037	-0.162	0.2243	0.510154	FALSE
AKR1B1_Y199_G204S	EKLIQYCQSKS	AKR1B1_Y199	EKLIQYCQSKG	G	5	S	0.453541	0.893566	0.479187	0.608765	0.246978	0.566742	0.611132	0.537411	0.571762	0.0371158	-0.7881	-0.8085	0.0204	0.3183	0.95198	FALSE
AKR1B1_Y40_H42L	AIDVGYRLIDC	AKR1B1_Y40	AIDVGYRHIDC	H	2	L	1.6127	2.00709	2.4252	2.01499	0.406306	0.681043	1.18201	1.07637	0.979809	0.264076	0.9909	-0.06892	1.06	0.2989	0.023879	TRUE
AKR1B10_Y310_N313D	SHLEDYPFDAE	AKR1B10_Y310	SHLEDYPFNAE	N	3	D	0.536006	0.533936	0.343228	0.471057	0.110708	0.568514	0.373949	0.269093	0.403852	0.151934	-1.116	-1.376	0.26	0.3782	0.529637	FALSE
AKR1B10_Y316_N313D	PFDAEYGGGGG	AKR1B10_Y316	PFNAEYGGGGG	N	-3	D	0.509935	0.338273	0.284543	0.377584	0.117726	0.26485	0.766595	0.106006	0.37915	0.344809	-1.45	-1.846	0.3965	0.8617	0.669344	FALSE
AKR1C2_Y305_N300T	TRNVRYLTLDI	AKR1C2_Y305	NRNVRYLTLDI	N	-5	T	1.4025	1.72751	2.04877	1.72626	0.323139	2.26778	1.96315	1.64367	1.9582	0.312082	0.7705	0.9571	-0.1866	0.2074	0.419124	FALSE
AKR1C2_Y81_I79V	REDVFYTSKLW	AKR1C2_Y81	REDIFYTSKLW	I	-2	V	0.517381	0.641534	0.373754	0.51089	0.134008	0.710913	0.737899	0.345434	0.598082	0.219215	-1.004	-0.8214	-0.1822	0.4223	0.688346	FALSE
AKR1C3_Y81_E77G	RGDIFYTSKLW	AKR1C3_Y81	REDIFYTSKLW	E	-4	G	0.727539	0.710843	0.212889	0.550424	0.292433	0.710913	0.737899	0.345434	0.598082	0.219215	-1.061	-0.8214	-0.2396	0.6854	0.744271	FALSE
AKR1D1_Y199_P198L	VECHLYFTQPK	AKR1D1_Y199	VECHPYFTQPK	P	-1	L	0.345863	0.436323	0.340734	0.374307	0.0537689	0.402977	0.537875	0.390587	0.443813	0.0816956	-1.427	-1.187	-0.2398	0.1869	0.268787	FALSE
AKT1_Y437_T435P	ETDPRYFDEEF	AKT1_Y437	ETDTRYFDEEF	T	-2	P	0.442327	0.602904	0.477028	0.507419	0.0844925	0.846368	1.19608	0.282683	0.775045	0.460858	-0.9916	-0.6017	-0.3899	0.6415	0.576197	FALSE
AKT3_Y173_G171R	KASRKYYAMKI	AKT3_Y173	KASGKYYAMKI	G	-2	R	0.74489	0.449116	0.763245	0.652417	0.176303	1.39801	0.698184	2.24157	1.44592	0.772807	-0.6565	0.3765	-1.033	0.5487	0.132851	FALSE
AKT3_Y173_G171R_YF	KASRKYFAMKI	AKT3_Y173_YF	KASGKYFAMKI	G	-2	R	0.577173	0.534294	0.304486	0.471984	0.146634	0.676839	0.937996	2.02528	1.21337	0.715154	-1.138	0.1209	-1.258	0.5516	0.084649	FALSE
AKT3_Y174_G171R	ASRKYYAMKIL	AKT3_Y174	ASGKYYAMKIL	G	-3	R	1.00752	0.710843	1.83037	1.18291	0.580008	0.786983	1.24122	2.25578	1.42799	0.751998	0.1302	0.3799	-0.2497	0.5935	0.695517	FALSE
AKT3_Y174_G171R_YF	ASRKFYAMKIL	AKT3_Y174_YF	ASGKFYAMKIL	G	-3	R	0.446934	0.481927	0.700939	0.543267	0.137665	0.863411	0.85347	0.573449	0.763443	0.164615	-0.9092	-0.4142	-0.495	0.2792	0.150973	FALSE
ALAS2_Y199_R204Q	WCSNDYLGMSQ	ALAS2_Y199	WCSNDYLGMSR	R	5	Q	0.648426	0.970505	0.531124	0.716685	0.227504	0.559996	0.762254	0.603344	0.641865	0.106489	-0.527	-0.6524	0.1254	0.2888	0.686609	FALSE
ALAS2_Y199_Y199H	WCSNDHLGMSR	ALAS2_Y199	WCSNDYLGMSR	Y	0	H	0.562648	0.959152	0.531091	0.684297	0.238554	0.559996	0.762254	0.603344	0.641865	0.106489	-0.6009	-0.6524	0.05143	0.3027	0.873351	FALSE
ALB_Y108_E106K	TLRKTYGEMAD	ALB_Y108	TLRETYGEMAD	E	-2	K	0.560158	0.558864	0.228225	0.449082	0.191269	1.84961	0.575803	0.305298	0.910236	0.824686	-1.269	-0.5403	-0.7287	0.8748	0.451674	FALSE
ALB_Y172_Y174F	ARRHPYFFAPE	ALB_Y172	ARRHPYFYAPE	Y	2	F	0.737796	0.492811	0.343606	0.524738	0.199025	0.485558	0.25885	0.154333	0.29958	0.169327	-1	-1.896	0.8957	0.5744	0.193931	FALSE
ALB_Y174_Y174F	RHPYFFAPELL	ALB_Y174	RHPYFYAPELL	Y	0	F	0.525805	0.887908	1.44909	0.954266	0.465203	0.734584	0.876109	0.776874	0.795856	0.0726469	-0.1879	-0.3334	0.1454	0.4289	0.751597	FALSE
ALB_Y174_Y174F_YF	RHPFFFAPELL	ALB_Y174_YF	RHPFFYAPELL	Y	0	F	1.10429	0.904093	1.13229	1.04689	0.124455	0.920787	0.893741	1.14961	0.988045	0.14057	0.05897	-0.02666	0.08563	0.1539	0.607584	FALSE
ALB_Y287_Q292R	ADLAKYICENR	ALB_Y287	ADLAKYICENQ	Q	5	R	0.331062	0.559145	0.382732	0.424313	0.119591	0.851303	0.746684	0.222065	0.606684	0.337172	-1.273	-0.9415	-0.3315	0.657	0.640394	FALSE
ALB_Y343_A344T	DVCKNYTEAKD	ALB_Y343	DVCKNYAEAKD	A	1	T	0.751067	0.836286	0.832707	0.806687	0.0482013	0.756714	0.950533	1.35504	1.02076	0.305281	-0.3117	-0.01235	-0.2993	0.2497	0.296834	FALSE
ALB_Y343_D338G	GVCKNYAEAKD	ALB_Y343	DVCKNYAEAKD	D	-5	G	0.697915	0.993089	0.784081	0.825028	0.151788	0.756714	0.950533	1.35504	1.02076	0.305281	-0.2933	-0.01235	-0.2809	0.2867	0.382668	FALSE
ALB_Y343_D338V	VVCKNYAEAKD	ALB_Y343	DVCKNYAEAKD	D	-5	V	0.746395	0.675462	0.519214	0.647024	0.11623	0.756714	0.950533	1.35504	1.02076	0.305281	-0.6445	-0.01235	-0.6322	0.2901	0.094861	FALSE
ALB_Y343_E345K	DVCKNYAKAKD	ALB_Y343	DVCKNYAEAKD	E	2	K	0.746527	0.530328	0.399463	0.558773	0.175272	0.756714	0.950533	1.35504	1.02076	0.305281	-0.8869	-0.01235	-0.8745	0.3575	0.070737	FALSE
ALB_Y343_N342K	DVCKKYAEAKD	ALB_Y343	DVCKNYAEAKD	N	-1	K	0.665435	0.673281	0.346079	0.561599	0.186686	0.756714	0.950533	1.35504	1.02076	0.305281	-0.8964	-0.01235	-0.884	0.4006	0.09193	FALSE
ALB_Y377_E378K	RLAKTYKTTLE	ALB_Y377	RLAKTYETTLE	E	1	K	0.312145	1.56804	0.136294	0.672158	0.780819	0.345002	0.471523	0.602074	0.472866	0.128541	-1.302	-1.117	-0.1847	1.061	0.870209	FALSE
ALB_Y377_E382K	RLAKTYETTLK	ALB_Y377	RLAKTYETTLE	E	5	K	0.720061	0.454503	0.496904	0.557156	0.142664	0.345002	0.471523	0.602074	0.472866	0.128541	-0.8735	-1.117	0.2438	0.3088	0.473925	FALSE
ALB_Y394_D389H	HPHECYAKVFD	ALB_Y394	DPHECYAKVFD	D	-5	H	1.54058	2.4309	5.25139	3.07429	1.93726	1.90098	2.58488	4.56985	3.01857	1.38628	1.433	1.496	-0.06378	0.6356	0.924901	FALSE
ALB_Y394_D389V	VPHECYAKVFD	ALB_Y394	DPHECYAKVFD	D	-5	V	1.7016	1.77199	3.52471	2.33277	1.03285	1.90098	2.58488	4.56985	3.01857	1.38628	1.137	1.496	-0.3597	0.5036	0.514494	FALSE
ALB_Y394_D399N	DPHECYAKVFN	ALB_Y394	DPHECYAKVFD	D	5	N	1.10783	1.1408	1.94254	1.39706	0.472688	1.90098	2.58488	4.56985	3.01857	1.38628	0.4319	1.496	-1.064	0.4547	0.079296	FALSE
ALB_Y394_K396E	DPHECYAEVFD	ALB_Y394	DPHECYAKVFD	K	2	E	1.14304	1.03986	1.51701	1.2333	0.251057	1.90098	2.58488	4.56985	3.01857	1.38628	0.2835	1.496	-1.213	0.4052	0.040221	TRUE
ALB_Y425_E420K	KQLGEYKFQNA	ALB_Y425	EQLGEYKFQNA	E	-5	K	0.618657	0.71188	0.364607	0.565048	0.179736	0.657986	0.584254	0.311721	0.517987	0.182396	-0.8796	-1.02	0.1407	0.4452	0.767706	FALSE
ALB_Y521_D518N	EVNETYVPKEF	ALB_Y521	EVDETYVPKEF	D	-3	N	0.424158	0.52511	0.263621	0.404296	0.131871	0.58663	0.672538	0.235893	0.498354	0.231321	-1.363	-1.142	-0.2215	0.558	0.711673	FALSE
ALB_Y521_E525K	EVDETYVPKKF	ALB_Y521	EVDETYVPKEF	E	4	K	1.08487	0.568043	0.186507	0.613139	0.450874	0.58663	0.672538	0.235893	0.498354	0.231321	-1.04	-1.142	0.1015	0.8805	0.913793	FALSE
ALCAM_Y298_T301M	RSSNTYTLMDV	ALCAM_Y298	RSSNTYTLTDV	T	3	M	8.23242	5.12415	5.27712	6.21123	1.75207	1.30867	1.40848	0.853038	1.19006	0.296108	2.599	0.2176	2.382	0.316	0.001659	TRUE
ALDH1A1_Y119_N121S	LYSNAYLSDLA	ALDH1A1_Y119	LYSNAYLNDLA	N	2	S	0.74489	0.955755	1.62751	1.10938	0.460928	1.74455	1.67257	2.1111	1.84274	0.235177	0.07083	0.8743	-0.8035	0.3482	0.082271	FALSE
ALDH1A1_Y119_N121S_YF	LFSNAYLSDLA	ALDH1A1_Y119_YF	LFSNAYLNDLA	N	2	S	0.503215	0.428865	0.148043	0.360041	0.187321	1.27459	1.40078	1.18576	1.28704	0.108051	-1.656	0.3607	-2.017	0.5583	0.022514	FALSE
ALDH1A3_Y492_A493P	RELGEYPLAEY	ALDH1A3_Y492	RELGEYALAEY	A	1	P	2.23231	2.98154	2.16366	2.45917	0.453686	1.38444	1.3558	0.784156	1.1748	0.338609	1.283	0.1859	1.097	0.3062	0.02313	TRUE
ALDH1A3_Y492_A493P_YF	RELGEYPLAEF	ALDH1A3_Y492_YF	RELGEYALAEF	A	1	P	2.87031	2.4775	1.03938	2.12906	0.963916	1.73866	0.578173	0.47221	0.929681	0.702598	0.9619	-0.3583	1.32	0.7419	0.149765	FALSE
ALDH1A3_Y497_A493P	YPLAEYTEVKT	ALDH1A3_Y497	YALAEYTEVKT	A	-4	P	2.25122	1.71583	1.37146	1.7795	0.443327	5.31907	5.47987	5.97322	5.59072	0.340873	0.8018	2.481	-1.68	0.2127	0.001392	TRUE
ALDH1A3_Y497_A493P_YF	FPLAEYTEVKT	ALDH1A3_Y497_YF	FALAEYTEVKT	A	-4	P	2.90712	1.48673	1.22148	1.87178	0.906387	2.73678	1.71659	1.25488	1.90275	0.758286	0.8001	0.8532	-0.05307	0.5002	0.920613	FALSE
ALDH2_Y332_E337V	VQEDIYDEFVV	ALDH2_Y332	VQEDIYDEFVE	E	5	V	0.422328	0.728873	0.334757	0.495319	0.206949	0.34391	0.528181	0.437927	0.436673	0.0921419	-1.093	-1.217	0.1245	0.3779	0.758393	FALSE
ALDH2_Y497_E496K	RELGKYGLQAY	ALDH2_Y497	RELGEYGLQAY	E	-1	K	0.31508	0.86242	0.187404	0.454968	0.358592	0.313344	0.61538	0.424025	0.450916	0.152803	-1.432	-1.204	-0.2277	0.7051	0.762922	FALSE
ALDH2_Y497_E496K_YF	RELGKYGLQAF	ALDH2_Y497_YF	RELGEYGLQAF	E	-1	K	0.516204	0.541745	0.256182	0.438044	0.158014	1.3408	0.650445	0.284187	0.758478	0.536528	-1.268	-0.6708	-0.5969	0.7348	0.462227	FALSE
ALDH2_Y502_E504K	YGLQAYTKVKT	ALDH2_Y502	YGLQAYTEVKT	E	2	K	1.65453	1.93275	1.9749	1.85406	0.174075	7.30086	6.89633	6.63758	6.94492	0.334302	0.8863	2.795	-1.909	0.0898	2.9e-05	TRUE
ALDH2_Y502_E504K_YF	FGLQAYTKVKT	ALDH2_Y502_YF	FGLQAYTEVKT	E	2	K	0.961823	1.86874	1.31306	1.38121	0.457282	5.43369	5.53278	10.5331	7.16652	2.91595	0.4129	2.769	-2.356	0.4186	0.004903	TRUE
ALDH3A1_Y272_E270A	SLKAFYGEDAK	ALDH3A1_Y272	SLKEFYGEDAK	E	-2	A	0.874005	0.658892	0.505765	0.679554	0.184987	0.711205	0.504426	0.318019	0.511217	0.196681	-0.5932	-1.044	0.4507	0.4063	0.329495	FALSE
ALDH3A1_Y305_G309E	GQKVAYGGTED	ALDH3A1_Y305	GQKVAYGGTGD	G	4	E	0.458709	0.641152	0.311684	0.470515	0.165051	0.62133	0.51733	0.301103	0.479921	0.163358	-1.149	-1.123	-0.02612	0.4345	0.954944	FALSE
ALDH3B2_Y362_H361R	LKEIRYPPYTD	ALDH3B2_Y362	LKEIHYPPYTD	H	-1	R	0.662125	0.672665	0.329583	0.554791	0.195107	1.10669	0.407944	0.447822	0.654154	0.392419	-0.9227	-0.7688	-0.154	0.5709	0.800776	FALSE
ALDH3B2_Y362_H361R_YF	LKEIRYPPFTD	ALDH3B2_Y362_YF	LKEIHYPPFTD	H	-1	R	0.692027	0.669029	0.454312	0.605123	0.131111	0.71125	0.382448	0.422369	0.505356	0.179424	-0.7497	-1.041	0.2908	0.3391	0.439447	FALSE
ALDH3B2_Y365_H361R	IRYPPYTDWNQ	ALDH3B2_Y365	IHYPPYTDWNQ	H	-4	R	0.60212	0.523431	1.17505	0.766868	0.355681	2.23268	0.694172	0.808874	1.24524	0.85707	-0.4777	0.1087	-0.5864	0.6398	0.411215	FALSE
ALDH3B2_Y365_H361R_YF	IRFPPYTDWNQ	ALDH3B2_Y365_YF	IHFPPYTDWNQ	H	-4	R	1.2139	0.645135	0.446052	0.768361	0.398477	0.996554	0.940059	0.52602	0.820878	0.256912	-0.5058	-0.3403	-0.1655	0.5142	0.763722	FALSE
ALDH5A1_Y175_G176R	EARRVYRDIIH	ALDH5A1_Y175	EARRVYGDIIH	G	1	R	0.627579	0.453984	0.457357	0.512973	0.0992659	0.548962	0.460563	0.326388	0.445304	0.112069	-0.98	-1.2	0.2197	0.2688	0.459615	FALSE
ALDH5A1_Y175_H180Y	EARRVYGDIIY	ALDH5A1_Y175	EARRVYGDIIH	H	5	Y	0.544834	0.530609	0.435408	0.503617	0.0594973	0.548962	0.460563	0.326388	0.445304	0.112069	-0.9966	-1.2	0.203	0.2428	0.450046	FALSE
ALDH5A1_Y175_H180Y_YF	EARRVYGDIIF	ALDH5A1_Y175	EARRVYGDIIH	H	5	F	0.507487	0.603984	0.344086	0.485186	0.131377	0.548962	0.460563	0.326388	0.445304	0.112069	-1.082	-1.2	0.118	0.3257	0.735522	FALSE
ALDOA_Y138_G142V	ERCAQYKKDVA	ALDOA_Y138	ERCAQYKKDGA	G	4	V	0.539985	0.675002	0.540032	0.585006	0.0779386	0.637731	0.982636	0.284187	0.634851	0.349233	-0.7816	-0.8298	0.04814	0.5354	0.93268	FALSE
ALDOA_Y204_E207K	LKRCQYVTKKV	ALDOA_Y204	LKRCQYVTEKV	E	3	K	1.20464	0.725833	0.432307	0.787593	0.389853	0.579807	0.557524	0.451921	0.529751	0.0683167	-0.4679	-0.925	0.4572	0.4412	0.35859	FALSE
ALDOA_Y343_C339Y	AYQGKYTPSGQ	ALDOA_Y343	ACQGKYTPSGQ	C	-4	Y	0.499717	0.929206	0.43764	0.622188	0.267691	0.507991	0.785907	0.359834	0.551244	0.216305	-0.7663	-0.9331	0.1668	0.4673	0.73921	FALSE
ALDOA_Y343_G347S	ACQGKYTPSSQ	ALDOA_Y343	ACQGKYTPSGQ	G	4	S	0.577854	0.751527	0.330803	0.553395	0.211426	0.507991	0.785907	0.359834	0.551244	0.216305	-0.9331	-0.9331	3.667e-06	0.4777	0.999994	FALSE
ALDOA_Y343_C339Y_YF	AFQGKYTPSGQ	ALDOA_Y343	ACQGKYTPSGQ	C	-4	F	0.512613	0.933853	0.328985	0.591817	0.310115	0.507991	0.785907	0.359834	0.551244	0.216305	-0.8889	-0.9331	0.0442	0.5446	0.939212	FALSE
ALDOB_Y204_E207Q	LEHCQYVTQKV	ALDOB_Y204	LEHCQYVTEKV	E	3	Q	0.600757	0.884074	0.709426	0.731419	0.142933	0.931113	0.645554	0.655311	0.743993	0.162124	-0.4694	-0.448	-0.02136	0.2364	0.932343	FALSE
ALDOB_Y223_V222F	NDHHFYLEGTL	ALDOB_Y223	NDHHVYLEGTL	V	-1	F	0.485558	0.557524	0.966133	0.669738	0.259195	1.59222	1.88088	1.6831	1.71873	0.147593	-0.645	0.7779	-1.423	0.3113	0.010253	FALSE
ALDOB_Y302_R304Q	KLSFSYGQALQ	ALDOB_Y302	KLSFSYGRALQ	R	2	Q	0.622147	0.388276	0.414521	0.474981	0.128123	0.719237	0.696905	0.359606	0.591916	0.201496	-1.107	-0.824	-0.2827	0.3893	0.507967	FALSE
ALDOB_Y302_R304W	KLSFSYGWALQ	ALDOB_Y302	KLSFSYGRALQ	R	2	W	0.653147	0.414629	0.607127	0.558301	0.126533	0.719237	0.696905	0.359606	0.591916	0.201496	-0.8682	-0.824	-0.04421	0.3842	0.913941	FALSE
ALOX12_Y295_A298T	RGEKQYLATPL	ALOX12_Y295	RGEKQYLAAPL	A	3	T	0.761443	0.42523	0.520394	0.569023	0.173301	0.563874	0.58766	0.0763245	0.409286	0.288599	-0.8564	-1.768	0.912	1.003	0.414449	FALSE
ALOX12B_Y318_Y318C	IYLADCRIMEG	ALOX12B_Y318	IYLADYRIMEG	Y	0	C	0.593264	0.394019	0.361245	0.449509	0.125569	0.566485	0.885002	0.706439	0.719308	0.159648	-1.189	-0.4992	-0.6895	0.2885	0.075169	FALSE
ALOX12B_Y318_Y318C_YF	IFLADCRIMEG	ALOX12B_Y318_YF	IFLADYRIMEG	Y	0	C	0.549502	0.577259	0.256608	0.461123	0.177658	0.915459	0.896021	1.14947	0.986982	0.14105	-1.206	-0.02829	-1.178	0.3957	0.040849	FALSE
ALOX5_Y446_A447S	MKDLTYSSLCF	ALOX5_Y446	MKDLTYASLCF	A	1	S	0.576754	0.477878	0.609435	0.554689	0.0684982	0.283768	0.477878	0.470213	0.41062	0.109924	-0.8579	-1.324	0.4658	0.2687	0.158056	FALSE
ALPK3_Y342_T338I	HILQLYRCREE	ALPK3_Y342	HTLQLYRCREE	T	-4	I	0.63016	0.654485	0.352586	0.545744	0.167721	0.449093	0.512012	0.257853	0.406319	0.132368	-0.9272	-1.359	0.4314	0.4188	0.361138	FALSE
ALPL_Y117_A114G	GTGTAYLCGVK	ALPL_Y117	GTATAYLCGVK	A	-3	G	0.606491	0.658142	0.365804	0.543479	0.156023	0.225122	0.629795	0.440334	0.431751	0.202473	-0.9253	-1.334	0.4086	0.5094	0.46741	FALSE
ALPL_Y117_A116T	GTATTYLCGVK	ALPL_Y117	GTATAYLCGVK	A	-1	T	0.385475	0.663261	0.400864	0.4832	0.156127	0.225122	0.629795	0.440334	0.431751	0.202473	-1.095	-1.334	0.2384	0.5028	0.660132	FALSE
ALPL_Y117_G120R	GTATAYLCRVK	ALPL_Y117	GTATAYLCGVK	G	3	R	0.472854	0.682441	0.418765	0.524687	0.13927	0.225122	0.629795	0.440334	0.431751	0.202473	-0.9625	-1.334	0.3713	0.4838	0.485559	FALSE
ALX3_Y181_R183W	HYPDVYAWEQL	ALX3_Y181	HYPDVYAREQL	R	2	W	0.373906	1.23452	0.559274	0.722566	0.452947	0.621822	0.818301	0.252784	0.564302	0.287113	-0.6512	-0.9862	0.335	0.7198	0.665847	FALSE
ALX3_Y181_R183W_YF	HFPDVYAWEQL	ALX3_Y181_YF	HFPDVYAREQL	R	2	W	1.00718	0.653348	0.767631	0.809385	0.180571	0.60232	0.616761	0.460192	0.559758	0.0865282	-0.3284	-0.8494	0.521	0.227	0.083422	FALSE
AMH_Y195_R194C	SRDTCYLVLAV	AMH_Y195	SRDTRYLVLAV	R	-1	C	0.274844	0.397025	0.688172	0.453347	0.212342	0.690123	0.660994	1.08233	0.81115	0.235302	-1.245	-0.3394	-0.9057	0.447	0.112701	FALSE
AMZ2_Y26_N30D	VLVSQYEKLDA	AMZ2_Y26	VLVSQYEKLNA	N	4	D	7.30375	9.19914	5.29216	7.26502	1.95378	3.29171	2.66266	2.18566	2.71334	0.554764	2.825	1.42	1.405	0.2874	0.008115	TRUE
ANAPC4_Y469_R465Q	NQKGKYFNVER	ANAPC4_Y469	NRKGKYFNVER	R	-4	Q	0.447352	0.816053	0.738856	0.66742	0.194454	0.235746	0.356951	0.305596	0.299431	0.0608376	-0.6301	-1.76	1.13	0.3202	0.024229	FALSE
ANG_Y38_K41E	FLTQHYDAEPQ	ANG_Y38	FLTQHYDAKPQ	K	3	E	0.616461	0.767415	0.452439	0.612105	0.157533	0.676547	0.451329	0.31587	0.481249	0.182191	-0.7413	-1.125	0.3833	0.3868	0.377805	FALSE
ANG_Y38_K41I	FLTQHYDAIPQ	ANG_Y38	FLTQHYDAKPQ	K	3	I	13.3329	11.927	16.4545	13.9048	2.31725	0.676547	0.451329	0.31587	0.481249	0.182191	3.784	-1.125	4.909	0.3454	0.000142	TRUE
ANG_Y38_Q36L	FLTLHYDAKPQ	ANG_Y38	FLTQHYDAKPQ	Q	-2	L	0.810765	0.702165	0.444687	0.652539	0.188017	0.676547	0.451329	0.31587	0.481249	0.182191	-0.6606	-1.125	0.4641	0.4111	0.322067	FALSE
ANG_Y38_Y38H	FLTQHHDAKPQ	ANG_Y38	FLTQHYDAKPQ	Y	0	H	0.64689	0.590771	0.573604	0.603755	0.0383294	0.676547	0.451329	0.31587	0.481249	0.182191	-0.7299	-1.125	0.3948	0.3217	0.28698	FALSE
ANGPTL3_Y417_N418Y	NLNGKYYKPRA	ANGPTL3_Y417	NLNGKYNKPRA	N	1	Y	0.690156	0.582658	1.3111	0.861303	0.393222	0.769124	0.867844	1.91435	1.18377	0.63462	-0.3078	0.1179	-0.4257	0.5452	0.478485	FALSE
ANGPTL3_Y417_Y417C	NLNGKCNKPRA	ANGPTL3_Y417	NLNGKYNKPRA	Y	0	C	0.364169	0.825425	0.298661	0.496085	0.287091	0.769124	0.867844	1.91435	1.18377	0.63462	-1.159	0.1179	-1.277	0.6097	0.104273	FALSE
ANGPTL3_Y417_N418Y_YF	NLNGKYFKPRA	ANGPTL3_Y417	NLNGKYNKPRA	N	1	F	0.514868	0.780533	1.58792	0.961106	0.558849	0.769124	0.867844	1.91435	1.18377	0.63462	-0.216	0.1179	-0.3339	0.6287	0.623454	FALSE
ANGPTL7_Y145_R140H	HISGVYKLPPD	ANGPTL7_Y145	RISGVYKLPPD	R	-5	H	0.467714	0.475162	0.432995	0.458624	0.0225055	0.821035	0.394474	0.360421	0.52531	0.25667	-1.126	-1.033	-0.09289	0.3784	0.818155	FALSE
ANK1_Y624_R619H	HSLLQYGGSAN	ANK1_Y624	RSLLQYGGSAN	R	-5	H	0.326333	0.459957	0.313476	0.366589	0.0811148	0.648761	0.533936	0.262183	0.481627	0.198526	-1.47	-1.154	-0.3162	0.4343	0.506835	FALSE
ANK1_Y735_L733I	KTKIGYSPLHQ	ANK1_Y735	KTKLGYSPLHQ	L	-2	I	0.418832	0.501771	0.273385	0.397996	0.11561	0.57358	0.67321	1.30099	0.849259	0.394366	-1.374	-0.3311	-1.043	0.4452	0.079171	FALSE
ANKZF1_Y572_R569W	RAWPPYTVAAD	ANKZF1_Y572	RARPPYTVAAD	R	-3	W	0.591498	0.691743	0.384829	0.556023	0.156502	0.484985	0.727569	1.58694	0.933166	0.579035	-0.889	-0.2789	-0.6101	0.562	0.338666	FALSE
ANO1_Y981_G983R	APSHAYHRGVL	ANO1_Y981	APSHAYHGGVL	G	2	R	0.64363	0.671563	0.720574	0.678589	0.0389504	0.751985	0.722247	0.414024	0.629419	0.187129	-0.561	-0.7176	0.1567	0.2818	0.607926	FALSE
ANOS1_Y217_Y217D	IEPVIDVVQRR	ANOS1_Y217	IEPVIYVVQRR	Y	0	D	0.676609	0.65299	0.495235	0.608278	0.0986076	0.375378	0.17606	0.214663	0.255367	0.10571	-0.7308	-2.046	1.316	0.3566	0.021035	FALSE
ANOS1_Y259_R262P	RPSRWYQFPVA	ANOS1_Y259	RPSRWYQFRVA	R	3	P	1.97668	0.754697	2.40053	1.71064	0.854562	1.01125	0.289912	0.32185	0.541003	0.407555	0.6135	-1.135	1.749	0.7744	0.086859	FALSE
ANPEP_Y600_I603K	RQQQDYWLKDV	ANPEP_Y600	RQQQDYWLIDV	I	3	K	1.07498	0.56748	0.381622	0.674694	0.358897	0.551771	0.643297	0.562649	0.585905	0.0499992	-0.7009	-0.7747	0.07372	0.4407	0.875277	FALSE
ANPEP_Y600_I603M	RQQQDYWLMDV	ANPEP_Y600	RQQQDYWLIDV	I	3	M	0.675367	0.64654	0.579248	0.633719	0.0493255	0.551771	0.643297	0.562649	0.585905	0.0499992	-0.6611	-0.7747	0.1136	0.09584	0.301476	FALSE
ANTXR2_Y380_Y381C	TVDASYCGGRG	ANTXR2_Y380	TVDASYYGGRG	Y	1	C	0.535692	0.809916	0.356421	0.567343	0.228399	0.863915	0.518709	0.430548	0.604391	0.229037	-0.8977	-0.7913	-0.1064	0.455	0.826577	FALSE
ANTXR2_Y381_Y381C	VDASYCGGRGV	ANTXR2_Y381	VDASYYGGRGV	Y	0	C	0.397275	0.456156	0.293556	0.382329	0.082324	0.411463	0.64929	0.352031	0.470928	0.157298	-1.411	-1.137	-0.274	0.3248	0.446313	FALSE
ANTXR2_Y381_Y381C_YF	VDASFCGGRGV	ANTXR2_Y381_YF	VDASFYGGRGV	Y	0	C	0.425469	0.445187	0.295679	0.388778	0.0812271	0.591067	0.422454	0.486202	0.499908	0.0851384	-1.386	-1.014	-0.3721	0.2338	0.18671	FALSE
ANXA1_Y335_G333E	ETKEDYEKILV	ANXA1_Y335	ETKGDYEKILV	G	-2	E	0.699678	0.79582	0.286217	0.593905	0.270767	1.05399	1.31416	0.880667	1.08294	0.218193	-0.8832	0.09556	-0.9787	0.4931	0.118124	FALSE
ANXA13_Y90_R86H	DHPSEYAARQL	ANXA13_Y90	DRPSEYAARQL	R	-4	H	0.601653	0.549077	0.299621	0.48345	0.161357	0.67364	0.553904	0.341064	0.522869	0.168446	-1.112	-0.9914	-0.1209	0.4299	0.792534	FALSE
ANXA3_Y15_S19N	GTVRDYPDFNP	ANXA3_Y15	GTVRDYPDFSP	S	4	N	0.637213	0.699308	0.272587	0.53637	0.230542	0.420897	0.591978	0.304699	0.439191	0.144511	-1.014	-1.24	0.226	0.5134	0.682494	FALSE
ANXA3_Y216_I219N	LTFDEYRNNSQ	ANXA3_Y216	LTFDEYRNISQ	I	3	N	0.329813	0.752657	0.168363	0.416944	0.301735	0.510782	0.619471	0.338536	0.489596	0.141661	-1.527	-1.074	-0.4526	0.6756	0.539562	FALSE
ANXA3_Y295_F291S	ESKKHYGYSLY	ANXA3_Y295	EFKKHYGYSLY	F	-4	S	1.48136	0.618983	0.640141	0.913496	0.491902	1.37518	1.29027	2.05078	1.57208	0.416734	-0.2562	0.6212	-0.8774	0.4619	0.130316	FALSE
ANXA3_Y295_F291S_YF	ESKKHYGFSLF	ANXA3_Y295_YF	EFKKHYGFSLF	F	-4	S	0.729877	0.485344	0.715542	0.643588	0.13723	0.532389	0.609952	0.723181	0.621841	0.0959504	-0.66	-0.6968	0.03672	0.2303	0.881061	FALSE
AP1S3_Y87_I83T	ETVHRYVELLD	AP1S3_Y87	EIVHRYVELLD	I	-4	T	22.9532	23.2286	27.3173	24.4997	2.44398	22.5249	19.0055	23.1314	21.5539	2.22777	4.61	4.425	0.1855	0.1202	0.19748	FALSE
APBA1_Y183_S184A	GEDEPYAEPYA	APBA1_Y183	GEDEPYSEPYA	S	1	A	1.06413	1.01875	0.381622	0.8215	0.38162	0.800479	0.69133	0.253117	0.581642	0.289698	-0.4244	-0.9452	0.5208	0.7112	0.504585	FALSE
APBA1_Y183_S184A_YF	GEDEPYAEPFA	APBA1_Y183_YF	GEDEPYSEPFA	S	1	A	0.827656	0.8018	0.278783	0.636079	0.309698	0.601524	0.788154	0.390296	0.593325	0.199056	-0.8115	-0.8114	-8.423e-05	0.5944	0.999894	FALSE
APBA1_Y187_S184A	PYAEPYADYGG	APBA1_Y187	PYSEPYADYGG	S	-3	A	8.24213	7.15085	7.75171	7.7149	0.54657	6.94663	4.94802	7.51066	6.46844	1.34658	2.945	2.671	0.2745	0.1941	0.230175	FALSE
APBA1_Y187_S184A_YF	PFAEPYADFGG	APBA1_Y187_YF	PFSEPYADFGG	S	-3	A	1.09648	0.583455	0.348102	0.676012	0.382678	1.14509	0.816374	0.643988	0.868483	0.254581	-0.7223	-0.244	-0.4782	0.5359	0.422576	FALSE
APBB1IP_Y331_R335W	SWKRRYFLLWA	APBB1IP_Y331	SWKRRYFLLRA	R	4	W	0.616285	0.418143	0.251067	0.428499	0.182829	0.598633	0.355662	0.228144	0.394146	0.188219	-1.317	-1.455	0.1378	0.55	0.814438	FALSE
APBB1IP_Y340_R335W	WASGIYYVPKG	APBB1IP_Y340	RASGIYYVPKG	R	-5	W	1.06637	0.58028	1.00224	0.882963	0.264085	0.732476	1.09841	1.0355	0.95546	0.195655	-0.2297	-0.0878	-0.1419	0.3332	0.69205	FALSE
APBB1IP_Y340_R335W_YF	WASGIYFVPKG	APBB1IP_Y340_YF	RASGIYFVPKG	R	-5	W	0.914363	0.756386	0.87286	0.84787	0.0818997	1.07595	0.428865	1.30099	0.935268	0.452762	-0.2427	-0.2454	0.00268	0.5012	0.995989	FALSE
APC_Y96_R99W	MSLRSYGSWEG	APC_Y96	MSLRSYGSREG	R	3	W	0.397275	0.209071	0.238514	0.28162	0.101236	0.555773	0.561949	0.242399	0.453373	0.182736	-1.886	-1.241	-0.6447	0.4911	0.259478	FALSE
APCS_Y142_G141S	GLRQSYFVEAQ	APCS_Y142	GLRQGYFVEAQ	G	-1	S	1.13507	0.61581	0.291173	0.680685	0.425673	0.607072	0.748256	0.497768	0.617699	0.125581	-0.7656	-0.715	-0.0506	0.5924	0.93604	FALSE
API5_Y497_G493S	LSNFNYEQRGA	API5_Y497	LGNFNYEQRGA	G	-4	S	0.52497	0.652303	0.263188	0.480154	0.198391	0.675016	0.359293	0.352586	0.462298	0.184249	-1.157	-1.183	0.02527	0.5006	0.962161	FALSE
APOA1_Y190_P189R	THLARYSDELR	APOA1_Y190	THLAPYSDELR	P	-1	R	0.839313	0.678725	0.143108	0.553715	0.364549	0.416193	0.384957	0.509927	0.437025	0.0650373	-1.206	-1.205	-0.001031	0.8135	0.999049	FALSE
APOA1_Y53_G50R	DSRRDYVSQFE	APOA1_Y53	DSGRDYVSQFE	G	-3	R	0.818627	0.602904	0.170367	0.530633	0.330117	0.532348	0.673807	0.254668	0.486941	0.213227	-1.191	-1.151	-0.03985	0.8119	0.963207	FALSE
APOA4_Y310_R305C	CRVEPYGENFN	APOA4_Y310	RRVEPYGENFN	R	-5	C	0.732751	0.514637	0.778821	0.675403	0.14112	0.504476	0.778611	0.255966	0.513018	0.261427	-0.5892	-1.105	0.5155	0.5028	0.363201	FALSE
APOA4_Y310_V307L	RRLEPYGENFN	APOA4_Y310	RRVEPYGENFN	V	-3	L	0.776893	0.460563	0.34346	0.526972	0.224218	0.504476	0.778611	0.255966	0.513018	0.261427	-1.008	-1.105	0.09654	0.5803	0.875938	FALSE
APOB_Y276_K273N	SYNNKYGMVAQ	APOB_Y276	SYKNKYGMVAQ	K	-3	N	0.632554	0.507745	0.331061	0.490453	0.151489	0.533838	0.720492	0.583658	0.612663	0.0966484	-1.078	-0.7184	-0.3594	0.3027	0.300889	FALSE
APOB_Y276_K273N_YF	SFNNKYGMVAQ	APOB_Y276_YF	SFKNKYGMVAQ	K	-3	N	0.606826	0.404778	0.294462	0.435355	0.158411	0.317204	0.514183	0.533323	0.454903	0.119635	-1.263	-1.174	-0.08874	0.3866	0.829725	FALSE
APOB_Y740_T741N	VDHFGYNKDDK	APOB_Y740	VDHFGYTKDDK	T	1	N	0.355892	0.648548	0.390296	0.464912	0.159961	0.647058	0.713152	0.416013	0.592074	0.156014	-1.158	-0.7937	-0.3638	0.3601	0.369504	FALSE
APOC2_Y47_W48R	ESLSSYRESAK	APOC2_Y47	ESLSSYWESAK	W	1	R	0.706266	0.602729	0.358865	0.555953	0.178362	0.591293	0.88632	0.661773	0.713129	0.154072	-0.9035	-0.5092	-0.3943	0.3425	0.313729	FALSE
APOE_Y180_R176C	KCLAVYQAGAR	APOE_Y180	KRLAVYQAGAR	R	-4	C	0.681619	0.560013	0.79001	0.677214	0.115062	0.899096	0.912312	0.824379	0.878595	0.0474158	-0.5765	-0.1882	-0.3883	0.1509	0.061699	FALSE
APP_Y728_L723P	PKKKQYTSIHH	APP_Y728	LKKKQYTSIHH	L	-5	P	0.699204	0.912312	1.19593	0.935815	0.249196	1.89608	1.61682	2.15096	1.88796	0.267165	-0.1302	0.9071	-1.037	0.2533	0.014918	FALSE
APRT_Y60_D65V	GGRIDYIAGLV	APRT_Y60	GGRIDYIAGLD	D	5	V	0.389708	0.515469	0.239512	0.381563	0.138159	0.474167	0.672155	0.347465	0.497929	0.163644	-1.459	-1.058	-0.4009	0.4242	0.398177	FALSE
APTX_Y209_A212V	VIKDKYPKVRY	APTX_Y209	VIKDKYPKARY	A	3	V	0.516457	0.939744	1.68274	1.04632	0.590402	0.737425	0.753576	2.26335	1.25145	0.876366	-0.09737	0.1103	-0.2077	0.7262	0.789108	FALSE
APTX_Y209_K211Q	VIKDKYPQARY	APTX_Y209	VIKDKYPKARY	K	2	Q	0.431936	0.614543	0.549137	0.531872	0.0925196	0.737425	0.753576	2.26335	1.25145	0.876366	-0.9261	0.1103	-1.036	0.5548	0.135155	FALSE
APTX_Y209_R213H	VIKDKYPKAHY	APTX_Y209	VIKDKYPKARY	R	4	H	0.63216	0.926839	1.30814	0.955713	0.338913	0.737425	0.753576	2.26335	1.25145	0.876366	-0.1279	0.1103	-0.2382	0.6141	0.717873	FALSE
APTX_Y209_A212V_YF	VIKDKYPKVRF	APTX_Y209_YF	VIKDKYPKARF	A	3	V	0.650538	0.814278	1.66845	1.04442	0.546588	0.662125	0.647447	1.82077	1.04345	0.673221	-0.0594	-0.1191	0.05975	0.6402	0.930135	FALSE
APTX_Y209_K211Q_YF	VIKDKYPQARF	APTX_Y209_YF	VIKDKYPKARF	K	2	Q	0.743617	0.603984	0.339045	0.562215	0.205495	0.662125	0.647447	1.82077	1.04345	0.673221	-0.9051	-0.1191	-0.7859	0.5974	0.258648	FALSE
APTX_Y209_R213H_YF	VIKDKYPKAHF	APTX_Y209_YF	VIKDKYPKARF	R	4	H	0.723748	0.418143	1.1553	0.765731	0.370369	0.662125	0.647447	1.82077	1.04345	0.673221	-0.5054	-0.1191	-0.3862	0.6493	0.583948	FALSE
APTX_Y214_A212V	YPKVRYHWLVL	APTX_Y214	YPKARYHWLVL	A	-2	V	0.636451	0.733358	0.899015	0.756274	0.132774	0.952628	0.893566	1.76101	1.2024	0.484671	-0.4176	0.1947	-0.6123	0.3439	0.149593	FALSE
APTX_Y214_H215R	YPKARYRWLVL	APTX_Y214	YPKARYHWLVL	H	1	R	0.694606	0.639809	1.46578	0.933398	0.461868	0.952628	0.893566	1.76101	1.2024	0.484671	-0.2061	0.1947	-0.4008	0.492	0.461017	FALSE
APTX_Y214_K211Q	YPQARYHWLVL	APTX_Y214	YPKARYHWLVL	K	-3	Q	0.75518	1.01875	1.16536	0.979762	0.207849	0.952628	0.893566	1.76101	1.2024	0.484671	-0.05251	0.1947	-0.2472	0.3627	0.532969	FALSE
APTX_Y214_R213H	YPKAHYHWLVL	APTX_Y214	YPKARYHWLVL	R	-1	H	0.804544	1.00537	1.7877	1.1992	0.519448	0.952628	0.893566	1.76101	1.2024	0.484671	0.1774	0.1947	-0.01732	0.4638	0.972	FALSE
APTX_Y214_A212V_YF	FPKVRYHWLVL	APTX_Y214_YF	FPKARYHWLVL	A	-2	V	0.465102	0.811928	1.39856	0.891863	0.471835	1.11959	0.930251	2.22344	1.42443	0.698409	-0.307	0.4038	-0.7108	0.597	0.299631	FALSE
APTX_Y214_H215R_YF	FPKARYRWLVL	APTX_Y214_YF	FPKARYHWLVL	H	1	R	0.695231	0.606004	0.422511	0.574582	0.139049	1.11959	0.930251	2.22344	1.42443	0.698409	-0.83	0.4038	-1.234	0.4383	0.048069	FALSE
APTX_Y214_K211Q_YF	FPQARYHWLVL	APTX_Y214_YF	FPKARYHWLVL	K	-3	Q	0.79455	1.0483	1.55519	1.13268	0.387276	1.11959	0.930251	2.22344	1.42443	0.698409	0.1245	0.4038	-0.2794	0.4746	0.587715	FALSE
APTX_Y214_R213H_YF	FPKAHYHWLVL	APTX_Y214_YF	FPKARYHWLVL	R	-1	H	1.28678	1.27877	2.05045	1.53867	0.443237	1.11959	0.930251	2.22344	1.42443	0.698409	0.5848	0.4038	0.181	0.4439	0.704356	FALSE
AQP6_Y231_V234I	LASLIYNFILF	AQP6_Y231	LASLIYNFVLF	V	3	I	0.651531	0.618124	1.80376	1.02447	0.675092	0.5297	0.698545	0.84911	0.692451	0.159792	-0.1537	-0.5568	0.4031	0.5402	0.497071	FALSE
AR_Y269_M268T	RGDCTYAPLLG	AR_Y269	RGDCMYAPLLG	M	-1	T	0.686202	1.03383	0.9674	0.895812	0.184541	0.77517	1.0065	1.33252	1.03807	0.280015	-0.181	0.0187	-0.1997	0.2907	0.529778	FALSE
AR_Y269_P271S	RGDCMYASLLG	AR_Y269	RGDCMYAPLLG	P	2	S	1.15939	0.903927	1.28403	1.11578	0.193768	0.77517	1.0065	1.33252	1.03807	0.280015	0.1428	0.0187	0.1241	0.2712	0.671041	FALSE
AR_Y395_P392R	ENRLDYGSAWA	AR_Y395	ENPLDYGSAWA	P	-3	R	0.693118	0.446019	0.357771	0.498969	0.173831	0.489722	0.628656	0.242748	0.453709	0.195458	-1.059	-1.247	0.1885	0.4975	0.724009	FALSE
AR_Y395_P392S	ENSLDYGSAWA	AR_Y395	ENPLDYGSAWA	P	-3	S	0.623248	0.562038	0.240053	0.475113	0.205856	0.489722	0.628656	0.242748	0.453709	0.195458	-1.191	-1.247	0.05671	0.5992	0.92915	FALSE
AR_Y552_L548F	VFPIDYYFPPQ	AR_Y552	VLPIDYYFPPQ	L	-4	F	0.99634	0.734575	1.38924	1.04005	0.329514	0.740551	0.872255	1.48475	1.03252	0.397141	0.007996	-0.0201	0.02809	0.4028	0.947746	FALSE
AR_Y552_P549S	VLSIDYYFPPQ	AR_Y552	VLPIDYYFPPQ	P	-3	S	1.2395	0.953659	1.82038	1.33785	0.441653	0.740551	0.872255	1.48475	1.03252	0.397141	0.3685	-0.0201	0.3886	0.4064	0.393058	FALSE
AR_Y552_L548F_YF	VFPIDYFFPPQ	AR_Y552_YF	VLPIDYFFPPQ	L	-4	F	0.612465	0.418143	0.906353	0.645654	0.245792	1.03733	0.574317	0.477028	0.696225	0.299383	-0.7024	-0.605	-0.09734	0.4669	0.845035	FALSE
AR_Y552_P549S_YF	VLSIDYFFPPQ	AR_Y552_YF	VLPIDYFFPPQ	P	-3	S	0.963603	0.964945	0.626629	0.851726	0.194941	1.03733	0.574317	0.477028	0.696225	0.299383	-0.2598	-0.605	0.3453	0.3964	0.432933	FALSE
AR_Y858_F857L	CSRRLYQLTKL	AR_Y858	CSRRFYQLTKL	F	-1	L	0.742162	0.414951	0.416013	0.524375	0.188609	0.541116	0.454939	0.221754	0.405936	0.165224	-0.9882	-1.398	0.4102	0.4827	0.443298	FALSE
AR_Y858_R855K	CSKRFYQLTKL	AR_Y858	CSRRFYQLTKL	R	-3	K	0.655155	0.729146	0.947921	0.777407	0.152233	0.541116	0.454939	0.221754	0.405936	0.165224	-0.381	-1.398	1.017	0.4246	0.074658	FALSE
AR_Y858_R856C	CSRCFYQLTKL	AR_Y858	CSRRFYQLTKL	R	-2	C	0.705097	0.756216	2.07679	1.17937	0.777608	0.541116	0.454939	0.221754	0.405936	0.165224	0.04904	-1.398	1.447	0.6393	0.086292	FALSE
AR_Y858_R856H	CSRHFYQLTKL	AR_Y858	CSRRFYQLTKL	R	-2	H	0.556661	0.780267	1.57328	0.970068	0.534223	0.541116	0.454939	0.221754	0.405936	0.165224	-0.1831	-1.398	1.215	0.5917	0.109193	FALSE
AR_Y916_F917L	KVKPIYLHTQG	AR_Y916	KVKPIYFHTQG	F	1	L	0.933596	1.16353	2.86217	1.6531	1.05338	0.888026	0.895179	2.33122	1.37147	0.831169	0.5455	0.2967	0.2488	0.6768	0.731761	FALSE
AR_Y916_H918R	KVKPIYFRTQG	AR_Y916	KVKPIYFHTQG	H	2	R	0.980926	0.778894	2.75782	1.50588	1.08891	0.888026	0.895179	2.33122	1.37147	0.831169	0.3584	0.2967	0.06175	0.7268	0.936376	FALSE
AR_Y916_K911R	RVKPIYFHTQG	AR_Y916	KVKPIYFHTQG	K	-5	R	1.20028	1.05531	2.34305	1.53288	0.705362	0.888026	0.895179	2.33122	1.37147	0.831169	0.5231	0.2967	0.2265	0.5838	0.717843	FALSE
AR_Y916_P914S	KVKSIYFHTQG	AR_Y916	KVKPIYFHTQG	P	-2	S	0.714479	0.500594	0.488122	0.567731	0.12724	0.888026	0.895179	2.33122	1.37147	0.831169	-0.8393	0.2967	-1.136	0.4951	0.083449	FALSE
AR_Y916_Q920R	KVKPIYFHTRG	AR_Y916	KVKPIYFHTQG	Q	4	R	1.20793	1.41761	2.88215	1.8359	0.912127	0.888026	0.895179	2.33122	1.37147	0.831169	0.7677	0.2967	0.471	0.6019	0.477596	FALSE
AR_Y916_V912L	KLKPIYFHTQG	AR_Y916	KVKPIYFHTQG	V	-4	L	1.43215	1.20875	3.19438	1.9451	1.08767	0.888026	0.895179	2.33122	1.37147	0.831169	0.8224	0.2967	0.5257	0.6329	0.45287	FALSE
ARAP1_Y359_R358Q	TDHLQYFDSNK	ARAP1_Y359	TDHLRYFDSNK	R	-1	Q	0.675367	0.76026	0.173465	0.536364	0.317133	0.489791	0.720936	0.310068	0.506932	0.20597	-1.163	-1.064	-0.09927	0.7691	0.903529	FALSE
ARAP2_Y380_K384N	IKSSIYDNRNE	ARAP2_Y380	IKSSIYDNRKE	K	4	N	0.536858	0.86242	0.424751	0.60801	0.227344	0.458171	0.473247	0.402492	0.444637	0.0372684	-0.7821	-1.173	0.3907	0.3089	0.274609	FALSE
ARCN1_Y310_K309N	ISDDNYGRIRL	ARCN1_Y310	ISDDKYGRIRL	K	-1	N	0.642402	0.54999	0.360588	0.51766	0.143662	0.434135	0.602126	0.265016	0.433759	0.168555	-0.9909	-1.284	0.293	0.4247	0.528231	FALSE
ARF1_Y35_Y35H	KTTILHKLKLG	ARF1_Y35	KTTILYKLKLG	Y	0	H	0.724147	0.774665	2.87313	1.45732	1.2264	0.737796	0.836286	1.02062	0.8649	0.143566	0.2295	-0.2224	0.4519	0.6614	0.531911	FALSE
ARFGAP3_Y356_S355R	TSSSRYFDEPV	ARFGAP3_Y356	TSSSSYFDEPV	S	-1	R	0.427834	0.650445	0.34693	0.47507	0.157174	0.708473	0.684785	0.312629	0.568629	0.222019	-1.124	-0.907	-0.2172	0.4687	0.667112	FALSE
ARFGAP3_Y473_Q468H	HPAGNYSLSSV	ARFGAP3_Y473	QPAGNYSLSSV	Q	-5	H	0.639094	0.658892	0.510622	0.602869	0.0804997	0.776492	0.270909	0.410978	0.486126	0.261034	-0.7392	-1.177	0.4382	0.4567	0.391661	FALSE
ARFGEF1_Y314_G316E	KNEVLYDEENH	ARFGEF1_Y314	KNEVLYDGENH	G	2	E	0.553069	0.51584	0.84027	0.636393	0.177541	0.871133	0.714644	0.407894	0.664557	0.235646	-0.6868	-0.6592	-0.02769	0.3947	0.947435	FALSE
ARFGEF2_Y797_K794E	MTEEQYIKMNR	ARFGEF2_Y797	MTKEQYIKMNR	K	-3	E	0.336156	0.552546	0.238514	0.375739	0.160714	0.310253	0.570195	0.482049	0.454166	0.132195	-1.499	-1.184	-0.3149	0.4386	0.512398	FALSE
ARFGEF2_Y797_R802Q	MTKEQYIKMNQ	ARFGEF2_Y797	MTKEQYIKMNR	R	5	Q	0.419762	0.557524	0.572434	0.516573	0.0841717	0.310253	0.570195	0.482049	0.454166	0.132195	-0.9667	-1.184	0.2172	0.2984	0.507034	FALSE
ARHGAP1_Y365_R369C	LPEENYQVLCF	ARHGAP1_Y365	LPEENYQVLRF	R	4	C	0.373906	1.07522	1.01018	0.819769	0.387496	0.595912	0.627214	0.419785	0.547637	0.111824	-0.4333	-0.8907	0.4574	0.5261	0.433752	FALSE
ARHGEF7_Y785_T790A	WTAHSYRMGSA	ARHGEF7_Y785	WTAHSYRMGST	T	5	A	0.600878	0.507255	0.52602	0.544718	0.049533	0.56213	0.590909	0.460579	0.537873	0.0684674	-0.8803	-0.9028	0.02254	0.1326	0.873256	FALSE
ARID1B_Y483_P488R	DMGAQYAAASR	ARID1B_Y483	DMGAQYAAASP	P	5	R	0.670847	0.74576	0.419456	0.612021	0.170921	0.860035	0.619173	0.411482	0.63023	0.22448	-0.7509	-0.7301	-0.02078	0.3996	0.961017	FALSE
ARMC9_Y107_L108F	IHFAIYFLKYS	ARMC9_Y107	IHFAIYLLKYS	L	1	F	1.12826	0.606004	1.59009	1.10812	0.492354	0.411634	0.684234	1.08126	0.725711	0.336736	0.0402	-0.5718	0.612	0.5725	0.345347	FALSE
ARMC9_Y107_L108F_YF	IHFAIYFLKFS	ARMC9_Y107_YF	IHFAIYLLKFS	L	1	F	1.09493	1.36744	0.892504	1.11829	0.238328	0.946838	1.71165	0.736352	1.13161	0.513233	0.1394	0.08502	0.0544	0.4021	0.898926	FALSE
ARPC1B_Y35_K37N	HEVHIYENSGA	ARPC1B_Y35	HEVHIYEKSGA	K	2	N	6.83092	5.70286	7.40147	6.64508	0.864416	2.07805	2.63557	2.157	2.29021	0.301685	2.724	1.187	1.536	0.154	0.000567	TRUE
ARSB_Y165_R160Q	QGFDTYFGYLL	ARSB_Y165	RGFDTYFGYLL	R	-5	Q	0.322115	0.435936	0.222177	0.326743	0.106955	0.480425	0.36715	0.402824	0.4168	0.0579166	-1.667	-1.272	-0.3958	0.3033	0.261955	FALSE
ARSB_Y165_R160Q_YF	QGFDTYFGFLL	ARSB_Y165_YF	RGFDTYFGFLL	R	-5	Q	0.404771	0.391166	0.240281	0.345406	0.0912947	0.424992	0.513509	0.795047	0.577849	0.193235	-1.572	-0.8423	-0.7298	0.3614	0.113627	FALSE
ARVCF_Y901_R906Q	LGPDGYSTVDQ	ARVCF_Y901	LGPDGYSTVDR	R	5	Q	43.6435	34.6222	29.8231	36.0296	7.01686	35.7756	19.2858	32.4813	29.1809	8.7263	5.153	4.817	0.3359	0.3197	0.352624	FALSE
ASAH1_Y43_T42A	PSGPAYRGAVP	ASAH1_Y43	PSGPTYRGAVP	T	-1	A	0.433391	0.624633	0.410533	0.489519	0.117569	0.526821	0.577259	0.453413	0.519164	0.0622772	-1.057	-0.9528	-0.1037	0.2156	0.655533	FALSE
ASAH1_Y43_T42M	PSGPMYRGAVP	ASAH1_Y43	PSGPTYRGAVP	T	-1	M	0.617195	0.484165	0.316031	0.472464	0.150922	0.526821	0.577259	0.453413	0.519164	0.0622772	-1.135	-0.9528	-0.182	0.3	0.576727	FALSE
ASB10_Y457_R453C	PCLLRYLQLDF	ASB10_Y457	PRLLRYLQLDF	R	-4	C	0.781734	0.911177	2.08786	1.26026	0.719643	0.865351	0.707103	1.754	1.10882	0.564316	0.1909	0.034	0.1569	0.593	0.804455	FALSE
ASB2_Y162_P160S	RETSLYKACER	ASB2_Y162	RETPLYKACER	P	-2	S	1.03102	1.17799	0.36345	0.857489	0.434115	0.68861	1.40029	0.477028	0.85531	0.48368	-0.3933	-0.3735	-0.0198	0.704	0.978911	FALSE
ASCC1_Y36_D34N	DEENFYQGSME	ASCC1_Y36	DEEDFYQGSME	D	-2	N	0.52662	0.794472	0.345434	0.555509	0.225908	0.519513	0.425479	0.335492	0.426828	0.0920179	-0.9302	-1.251	0.3209	0.3919	0.458871	FALSE
ASIC2_Y357_D354G	EKGSNYCLCRT	ASIC2_Y357	EKDSNYCLCRT	D	-3	G	0.646313	0.777317	0.511324	0.644985	0.133001	0.989367	0.905687	0.439169	0.778074	0.296468	-0.6536	-0.4485	-0.2051	0.4103	0.643381	FALSE
ASL_Y375_K380E	ATDLAYYLVRE	ASL_Y375	ATDLAYYLVRK	K	5	E	2.088	1.20797	1.43945	1.57847	0.456191	0.754822	0.868044	0.770584	0.797817	0.0613268	0.6201	-0.3286	0.9487	0.2411	0.017033	FALSE
ASL_Y375_R379C	ATDLAYYLVCK	ASL_Y375	ATDLAYYLVRK	R	4	C	0.462283	0.661677	0.647099	0.590353	0.111151	0.754822	0.868044	0.770584	0.797817	0.0613268	-0.779	-0.3286	-0.4503	0.1788	0.065414	FALSE
ASL_Y375_K380E_YF	ATDLAYFLVRE	ASL_Y375_YF	ATDLAYFLVRK	K	5	E	1.12775	1.56107	1.09283	1.26055	0.260842	2.05259	0.836286	0.647395	1.17876	0.76263	0.3147	0.05074	0.2639	0.5309	0.645139	FALSE
ASL_Y375_R379C_YF	ATDLAYFLVCK	ASL_Y375_YF	ATDLAYFLVRK	R	4	C	0.403482	0.496703	0.374555	0.424914	0.0638317	2.05259	0.836286	0.647395	1.17876	0.76263	-1.245	0.05074	-1.296	0.5192	0.067058	FALSE
ASL_Y376_K380E	TDLAYYLVREG	ASL_Y376	TDLAYYLVRKG	K	4	E	1.78019	1.34495	1.41945	1.51487	0.23278	1.14509	0.836286	0.404149	0.795174	0.372176	0.5883	-0.4565	1.045	0.4619	0.086483	FALSE
ASL_Y376_R379C	TDLAYYLVCKG	ASL_Y376	TDLAYYLVRKG	R	3	C	0.288927	0.851773	0.242851	0.461183	0.339044	1.14509	0.836286	0.404149	0.795174	0.372176	-1.355	-0.4565	-0.8983	0.7202	0.280324	FALSE
ASL_Y376_K380E_YF	TDLAFYLVREG	ASL_Y376_YF	TDLAFYLVRKG	K	4	E	0.500807	0.805081	0.531076	0.612321	0.16762	0.774001	0.985865	0.318019	0.692628	0.341278	-0.7412	-0.681	-0.06018	0.5411	0.916798	FALSE
ASL_Y376_R379C_YF	TDLAFYLVCKG	ASL_Y376_YF	TDLAFYLVRKG	R	3	C	0.418634	0.45373	0.292912	0.388425	0.0845576	0.774001	0.985865	0.318019	0.692628	0.341278	-1.389	-0.681	-0.7083	0.5328	0.254504	FALSE
ASNS_Y555_R550C	CTLTHYKSAVK	ASNS_Y555	RTLTHYKSAVK	R	-5	C	0.461596	0.621854	0.671373	0.584941	0.109652	0.45506	0.64477	0.533987	0.544606	0.0952996	-0.7918	-0.8914	0.09956	0.2197	0.673988	FALSE
ASPA_Y64_D68A	KKCTRYIDCAL	ASPA_Y64	KKCTRYIDCDL	D	4	A	0.502674	0.529648	1.09458	0.708966	0.33422	0.675367	0.627214	1.32216	0.874913	0.388072	-0.5929	-0.2788	-0.3142	0.4984	0.562674	FALSE
ASPA_Y64_L69R	KKCTRYIDCDR	ASPA_Y64	KKCTRYIDCDL	L	5	R	0.544735	0.572561	1.40048	0.839259	0.486233	0.675367	0.627214	1.32216	0.874913	0.388072	-0.3983	-0.2788	-0.1195	0.5595	0.841261	FALSE
ASPA_Y64_R63T	KKCTTYIDCDL	ASPA_Y64	KKCTRYIDCDL	R	-1	T	0.814088	0.693939	0.600702	0.70291	0.106975	0.675367	0.627214	1.32216	0.874913	0.388072	-0.5197	-0.2788	-0.2409	0.3649	0.545167	FALSE
ASS1_Y113_A111D	REGDKYVSHGA	ASS1_Y113	REGAKYVSHGA	A	-2	D	0.617983	0.369896	0.233214	0.407031	0.195054	0.375605	0.482473	0.388091	0.41539	0.0584301	-1.41	-1.277	-0.1332	0.4216	0.767767	FALSE
ASS1_Y113_A118T	REGAKYVSHGT	ASS1_Y113	REGAKYVSHGA	A	5	T	0.612465	0.786109	0.299846	0.56614	0.246419	0.375605	0.482473	0.388091	0.41539	0.0584301	-0.9307	-1.277	0.3458	0.4318	0.468055	FALSE
ASS1_Y113_G117C	REGAKYVSHCA	ASS1_Y113	REGAKYVSHGA	G	4	C	0.404771	0.884766	0.738258	0.675932	0.245993	0.375605	0.482473	0.388091	0.41539	0.0584301	-0.6398	-1.277	0.6368	0.3593	0.151041	FALSE
ASS1_Y113_G117D	REGAKYVSHDA	ASS1_Y113	REGAKYVSHGA	G	4	D	0.442979	0.532795	0.192415	0.389396	0.176403	0.375605	0.482473	0.388091	0.41539	0.0584301	-1.487	-1.277	-0.2103	0.466	0.675101	FALSE
ASS1_Y113_G117S	REGAKYVSHSA	ASS1_Y113	REGAKYVSHGA	G	4	S	0.464017	0.72535	0.228973	0.47278	0.248304	0.375605	0.482473	0.388091	0.41539	0.0584301	-1.233	-1.277	0.04399	0.4973	0.933767	FALSE
ASS1_Y113_R108L	LEGAKYVSHGA	ASS1_Y113	REGAKYVSHGA	R	-5	L	0.236971	0.962996	0.139133	0.446367	0.45008	0.375605	0.482473	0.388091	0.41539	0.0584301	-1.659	-1.277	-0.3825	0.8401	0.672544	FALSE
ASS1_Y163_A164P	NDLMEYPKQHG	ASS1_Y163	NDLMEYAKQHG	A	1	P	0.495233	0.642859	0.477028	0.538373	0.090944	0.452452	0.457756	0.232697	0.380968	0.128434	-0.9064	-1.458	0.552	0.3499	0.18978	FALSE
ASS1_Y163_L160P	NDPMEYAKQHG	ASS1_Y163	NDLMEYAKQHG	L	-3	P	0.426604	0.561506	0.381622	0.456578	0.0936128	0.452452	0.457756	0.232697	0.380968	0.128434	-1.15	-1.458	0.3079	0.3626	0.443717	FALSE
ASS1_Y291_D296G	AGTILYHAHLG	ASS1_Y291	AGTILYHAHLD	D	5	G	0.52324	0.408107	0.516313	0.482553	0.0645651	0.547965	0.625103	0.259048	0.477372	0.192968	-1.06	-1.165	0.1044	0.4125	0.812654	FALSE
ASS1_Y291_L290P	AGTIPYHAHLD	ASS1_Y291	AGTILYHAHLD	L	-1	P	0.512794	0.684234	0.46525	0.554093	0.115185	0.547965	0.625103	0.259048	0.477372	0.192968	-0.8716	-1.165	0.2932	0.4296	0.532456	FALSE
ASS1_Y291_Y291S	AGTILSHAHLD	ASS1_Y291	AGTILYHAHLD	Y	0	S	0.37104	0.427603	0.322149	0.373597	0.0527737	0.547965	0.625103	0.259048	0.477372	0.192968	-1.43	-1.165	-0.2653	0.413	0.555609	FALSE
ASS1_Y322_G324S	FAELVYTSFWH	ASS1_Y322	FAELVYTGFWH	G	2	S	0.516457	0.604973	0.750524	0.623985	0.118186	0.367847	0.637413	0.566143	0.523801	0.139682	-0.6975	-0.9711	0.2736	0.2872	0.394679	FALSE
ASS1_Y322_G324V	FAELVYTVFWH	ASS1_Y322	FAELVYTGFWH	G	2	V	0.630313	0.840984	0.666401	0.712566	0.112667	0.367847	0.637413	0.566143	0.523801	0.139682	-0.5004	-0.9711	0.4707	0.2726	0.159294	FALSE
ASS1_Y322_V321M	FAELMYTGFWH	ASS1_Y322	FAELVYTGFWH	V	-1	M	0.526121	0.610771	0.477028	0.537973	0.0676544	0.367847	0.637413	0.566143	0.523801	0.139682	-0.9019	-0.9711	0.0692	0.2623	0.804976	FALSE
ASS1_Y359_G356V	LKVQVYILGRE	ASS1_Y359	LKGQVYILGRE	G	-3	V	0.79455	0.768479	0.84805	0.803693	0.0405658	0.244477	0.390267	0.296086	0.310277	0.0739236	-0.3165	-1.715	1.399	0.2002	0.00221	FALSE
ASS1_Y359_G362V	LKGQVYILVRE	ASS1_Y359	LKGQVYILGRE	G	3	V	0.683034	0.533132	0.357771	0.524646	0.162797	0.244477	0.390267	0.296086	0.310277	0.0739236	-0.9801	-1.715	0.7351	0.335	0.093219	FALSE
ASS1_Y359_R363G	LKGQVYILGGE	ASS1_Y359	LKGQVYILGRE	R	4	G	0.628249	0.505256	0.454312	0.529272	0.0894205	0.244477	0.390267	0.296086	0.310277	0.0739236	-0.9312	-1.715	0.784	0.2394	0.030645	FALSE
ASS1_Y359_R363L	LKGQVYILGLE	ASS1_Y359	LKGQVYILGRE	R	4	L	0.609155	0.704241	0.477028	0.596808	0.114108	0.244477	0.390267	0.296086	0.310277	0.0739236	-0.7629	-1.715	0.9523	0.2554	0.020333	FALSE
ASS1_Y359_R363Q	LKGQVYILGQE	ASS1_Y359	LKGQVYILGRE	R	4	Q	0.674618	0.725833	0.21738	0.539277	0.279945	0.244477	0.390267	0.296086	0.310277	0.0739236	-1.077	-1.715	0.6379	0.5961	0.344849	FALSE
ASS1_Y359_R363W	LKGQVYILGWE	ASS1_Y359	LKGQVYILGRE	R	4	W	0.556185	0.513718	0.982967	0.68429	0.259532	0.244477	0.390267	0.296086	0.310277	0.0739236	-0.6107	-1.715	1.105	0.3539	0.035507	FALSE
ASS1_Y359_Y359D	LKGQVDILGRE	ASS1_Y359	LKGQVYILGRE	Y	0	D	0.550073	0.971171	0.263888	0.595044	0.355779	0.244477	0.390267	0.296086	0.310277	0.0739236	-0.9422	-1.715	0.773	0.5783	0.252268	FALSE
ASS1_Y83_R86C	QSSALYEDCYL	ASS1_Y83	QSSALYEDRYL	R	3	C	0.65864	0.82621	1.09615	0.860333	0.220742	0.79455	0.673675	0.489921	0.652715	0.153392	-0.2485	-0.6437	0.3952	0.2951	0.251563	FALSE
ASS1_Y83_R86H	QSSALYEDHYL	ASS1_Y83	QSSALYEDRYL	R	3	H	0.754149	0.570798	0.246465	0.523804	0.257084	0.79455	0.673675	0.489921	0.652715	0.153392	-1.079	-0.6437	-0.4352	0.5264	0.454846	FALSE
ASS1_Y83_S79P	QPSALYEDRYL	ASS1_Y83	QSSALYEDRYL	S	-4	P	1.23856	1.17699	0.536657	0.984071	0.388694	0.79455	0.673675	0.489921	0.652715	0.153392	-0.1181	-0.6437	0.5256	0.4409	0.29911	FALSE
ASS1_Y83_R86C_YF	QSSALYEDCFL	ASS1_Y83_YF	QSSALYEDRFL	R	3	C	0.645572	0.836286	1.01188	0.831245	0.183205	0.587276	0.578021	0.785693	0.65033	0.117319	-0.2907	-0.6356	0.3448	0.2367	0.218909	FALSE
ASS1_Y83_R86H_YF	QSSALYEDHFL	ASS1_Y83_YF	QSSALYEDRFL	R	3	H	0.361159	0.801441	0.276174	0.479591	0.28195	0.587276	0.578021	0.785693	0.65033	0.117319	-1.215	-0.6356	-0.5794	0.4835	0.296885	FALSE
ASS1_Y83_S79P_YF	QPSALYEDRFL	ASS1_Y83_YF	QSSALYEDRFL	S	-4	P	0.813028	0.743365	0.34346	0.633284	0.2534	0.587276	0.578021	0.785693	0.65033	0.117319	-0.7561	-0.6356	-0.1205	0.4201	0.788397	FALSE
ASS1_Y87_R86C	LYEDCYLLGTS	ASS1_Y87	LYEDRYLLGTS	R	-1	C	1.49742	0.434869	0.954056	0.962115	0.531322	0.564548	0.726248	0.348597	0.546465	0.189474	-0.2289	-0.9356	0.7066	0.6068	0.308895	FALSE
ASS1_Y87_R86H	LYEDHYLLGTS	ASS1_Y87	LYEDRYLLGTS	R	-1	H	1.04113	0.427867	0.24463	0.57121	0.417151	0.564548	0.726248	0.348597	0.546465	0.189474	-1.066	-0.9356	-0.1304	0.6831	0.85788	FALSE
ASS1_Y87_T91P	LYEDRYLLGPS	ASS1_Y87	LYEDRYLLGTS	T	4	P	0.79455	0.573922	0.50883	0.625767	0.149749	0.564548	0.726248	0.348597	0.546465	0.189474	-0.7025	-0.9356	0.233	0.3652	0.558149	FALSE
ASS1_Y87_R86C_YF	LFEDCYLLGTS	ASS1_Y87_YF	LFEDRYLLGTS	R	-1	C	0.829095	0.752657	0.360021	0.647258	0.251673	0.457468	0.582866	0.545175	0.528503	0.0643399	-0.7181	-0.9274	0.2094	0.3941	0.623366	FALSE
ASS1_Y87_R86H_YF	LFEDHYLLGTS	ASS1_Y87_YF	LFEDRYLLGTS	R	-1	H	0.654335	0.390267	0.556533	0.533712	0.133505	0.457468	0.582866	0.545175	0.528503	0.0643399	-0.9383	-0.9274	-0.01087	0.2436	0.966559	FALSE
ASS1_Y87_T91P_YF	LFEDRYLLGPS	ASS1_Y87_YF	LFEDRYLLGTS	T	4	P	0.750408	0.507745	0.397523	0.551892	0.180537	0.457468	0.582866	0.545175	0.528503	0.0643399	-0.9077	-0.9274	0.01975	0.2865	0.948345	FALSE
ASTL_Y279_K277Q	RVLQLYGCSPS	ASTL_Y279	RVLKLYGCSPS	K	-2	Q	0.479252	0.393546	0.605011	0.492603	0.106363	0.455304	0.712392	0.531373	0.566356	0.132066	-1.044	-0.8455	-0.1983	0.2608	0.489385	FALSE
ATM_Y332_R337C	GSRGKYSSGFC	ATM_Y332	GSRGKYSSGFR	R	5	C	0.54498	0.74743	1.52299	0.938466	0.516233	0.881756	0.407776	1.21092	0.833483	0.403741	-0.2296	-0.3999	0.1703	0.64	0.803369	FALSE
ATM_Y332_R337H	GSRGKYSSGFH	ATM_Y332	GSRGKYSSGFR	R	5	H	0.586453	0.599819	1.52866	0.904977	0.540165	0.881756	0.407776	1.21092	0.833483	0.403741	-0.2983	-0.3999	0.1015	0.6518	0.883766	FALSE
ATM_Y332_S333F	GSRGKYFSGFR	ATM_Y332	GSRGKYSSGFR	S	1	F	0.373906	0.672477	0.584969	0.543784	0.153487	0.881756	0.407776	1.21092	0.833483	0.403741	-0.9218	-0.3999	-0.5219	0.5316	0.381846	FALSE
ATM_Y332_Y332C	GSRGKCSSGFR	ATM_Y332	GSRGKYSSGFR	Y	0	C	0.708394	0.80773	1.2286	0.914909	0.276171	0.881756	0.407776	1.21092	0.833483	0.403741	-0.1695	-0.3999	0.2304	0.5242	0.682985	FALSE
ATM_Y54_S49C	CKQGKYLNWDA	ATM_Y54	SKQGKYLNWDA	S	-5	C	0.881624	0.761308	0.560631	0.734521	0.162164	0.567536	0.797885	0.593468	0.652963	0.126174	-0.47	-0.6319	0.1619	0.2466	0.547326	FALSE
ATP13A2_Y50_G49S	WRVISYHVVVW	ATP13A2_Y50	WRVIGYHVVVW	G	-1	S	0.706266	0.640892	0.510833	0.619331	0.0994847	0.493509	0.669928	1.01844	0.727292	0.267126	-0.7042	-0.5235	-0.1807	0.3331	0.616218	FALSE
ATP2A2_Y407_E412G	VNCHQYDGLVG	ATP2A2_Y407	VNCHQYDGLVE	E	5	G	9.30616	9.70569	14.3649	11.1256	2.81245	10.7992	12.2934	14.355	12.4825	1.78543	3.447	3.632	-0.1849	0.2321	0.470274	FALSE
ATP2A2_Y497_S495F	KSMFVYCTPNK	ATP2A2_Y497	KSMSVYCTPNK	S	-2	F	0.664017	0.951371	0.421064	0.678817	0.265463	0.702871	0.927366	1.21488	0.948372	0.256649	-0.6368	-0.1122	-0.5246	0.4095	0.26941	FALSE
ATP2A2_Y836_A838P	WLFFRYLPIGC	ATP2A2_Y836	WLFFRYLAIGC	A	2	P	0.695231	0.738617	0.954056	0.795968	0.138616	0.361159	0.448249	0.270829	0.360079	0.0887151	-0.3431	-1.504	1.161	0.2528	0.010098	FALSE
ATP2C1_Y452_A450T	IRKTEYPFSSE	ATP2C1_Y452	IRKAEYPFSSE	A	-2	T	0.618912	0.709025	0.432933	0.586957	0.140793	0.526326	0.599944	0.288204	0.471492	0.162943	-0.7987	-1.153	0.3539	0.3887	0.41407	FALSE
ATP5F1B_Y269_E274Q	KVALVYGQMNQ	ATP5F1B_Y269	KVALVYGQMNE	E	5	Q	0.337412	0.52339	0.440334	0.433712	0.0931658	0.721207	0.618575	0.370703	0.570161	0.180198	-1.228	-0.8654	-0.3629	0.3438	0.350719	FALSE
ATP6V0A2_Y688_R685Q	VNQSGYTLIRK	ATP6V0A2_Y688	VNRSGYTLIRK	R	-3	Q	10.6558	9.4197	5.48582	8.52044	2.69975	2.26897	2.22073	0.734302	1.74133	0.872448	3.035	0.6292	2.406	0.6127	0.01715	TRUE
ATP6V0D2_Y271_G272R	NVADHYRVYKP	ATP6V0D2_Y271	NVADHYGVYKP	G	1	R	0.465277	0.472934	0.470213	0.469475	0.00388167	0.52312	0.919914	0.347665	0.5969	0.293172	-1.091	-0.8598	-0.2311	0.407	0.600547	FALSE
ATP6V0D2_Y271_G272R_YF	NVADHYRVFKP	ATP6V0D2_Y271_YF	NVADHYGVFKP	G	1	R	0.388638	0.602485	0.199686	0.396937	0.201528	1.25929	0.427646	0.463653	0.716862	0.470098	-1.473	-0.6673	-0.8056	0.6823	0.303132	FALSE
ATP6V1A_Y374_D371G	PAGSGYPAYLG	ATP6V1A_Y374	PADSGYPAYLG	D	-3	G	0.458824	0.498837	0.229996	0.395886	0.145051	0.74158	0.613276	0.486763	0.613873	0.127409	-1.416	-0.7251	-0.6907	0.3951	0.155332	FALSE
ATP6V1A_Y374_D371G_YF	PAGSGYPAFLG	ATP6V1A_Y374_YF	PADSGYPAFLG	D	-3	G	0.676839	0.546802	0.389411	0.537684	0.143931	0.47673	0.557524	0.234604	0.422953	0.168043	-0.9316	-1.334	0.4029	0.4489	0.4202	FALSE
ATP6V1B1_Y462_R465H	INQGPYENHSV	ATP6V1B1_Y462	INQGPYENRSV	R	3	H	2.16999	2.47472	1.56465	2.06979	0.463236	0.572815	0.52599	0.497241	0.532015	0.0381455	1.024	-0.9129	1.937	0.2054	0.000706	TRUE
ATP8B1_Y658_I661T	TLCLCYKETEE	ATP8B1_Y658	TLCLCYKEIEE	I	3	T	0.385475	0.486213	0.616467	0.496051	0.11581	1.27319	1.36677	1.23568	1.29188	0.067513	-1.038	0.3682	-1.406	0.2002	0.002167	FALSE
ATR_Y317_V316I	NIEPIYLNMLL	ATR_Y317	NIEPVYLNMLL	V	-1	I	0.406373	0.476593	0.388936	0.423967	0.0464017	0.512043	0.408419	0.284439	0.401634	0.113954	-1.244	-1.357	0.1136	0.2626	0.687704	FALSE
ATRX_Y203_C200S	KNSFKYYMSDD	ATRX_Y203	KNCFKYYMSDD	C	-3	S	0.737285	0.788302	0.598306	0.707965	0.0983329	0.554853	0.688494	1.26312	0.835488	0.376317	-0.508	-0.3504	-0.1575	0.3749	0.695946	FALSE
ATRX_Y203_C200S_YF	KNSFKYFMSDD	ATRX_Y203_YF	KNCFKYFMSDD	C	-3	S	0.620136	0.66474	0.38447	0.556449	0.150598	0.460002	0.501771	0.676176	0.545983	0.114668	-0.8858	-0.8932	0.007393	0.3	0.981518	FALSE
ATRX_Y204_C200S	NSFKYYMSDDI	ATRX_Y204	NCFKYYMSDDI	C	-4	S	1.01951	1.05564	1.09035	1.05517	0.035421	0.993187	1.1784	2.38514	1.51891	0.755872	0.07693	0.4937	-0.4168	0.3878	0.343054	FALSE
ATRX_Y204_C200S_YF	NSFKFYMSDDI	ATRX_Y204_YF	NCFKFYMSDDI	C	-4	S	0.634304	0.84382	0.334189	0.604105	0.256154	0.680301	0.769176	0.61733	0.688936	0.0762904	-0.8277	-0.5434	-0.2843	0.4056	0.522065	FALSE
AVPR2_Y117_C112R	RRAVKYLQMVG	AVPR2_Y117	CRAVKYLQMVG	C	-5	R	0.826332	0.358408	0.390296	0.525012	0.261437	0.524065	0.659379	0.380487	0.52131	0.139467	-1.038	-0.9757	-0.06194	0.4466	0.896414	FALSE
AVPR2_Y117_C112Y	YRAVKYLQMVG	AVPR2_Y117	CRAVKYLQMVG	C	-5	Y	0.475092	0.355236	0.287061	0.372463	0.0951915	0.524065	0.659379	0.380487	0.52131	0.139467	-1.456	-0.9757	-0.4801	0.3119	0.198567	FALSE
AVPR2_Y117_G122D	CRAVKYLQMVD	AVPR2_Y117	CRAVKYLQMVG	G	5	D	0.542619	0.489825	0.562325	0.531589	0.0374874	0.524065	0.659379	0.380487	0.52131	0.139467	-0.9141	-0.9757	0.06164	0.2376	0.808154	FALSE
AVPR2_Y117_G122R	CRAVKYLQMVR	AVPR2_Y117	CRAVKYLQMVG	G	5	R	0.618707	0.727826	0.514442	0.620325	0.106701	0.524065	0.659379	0.380487	0.52131	0.139467	-0.7033	-0.9757	0.2724	0.2717	0.372823	FALSE
AVPR2_Y117_R113W	CWAVKYLQMVG	AVPR2_Y117	CRAVKYLQMVG	R	-4	W	0.515941	0.705616	1.5388	0.920119	0.544122	0.524065	0.659379	0.380487	0.52131	0.139467	-0.2787	-0.9757	0.697	0.5221	0.252791	FALSE
AVPR2_Y117_C112Y_YF	FRAVKYLQMVG	AVPR2_Y117	CRAVKYLQMVG	C	-5	F	0.603858	0.744817	0.306957	0.551877	0.22351	0.524065	0.659379	0.380487	0.52131	0.139467	-0.9522	-0.9757	0.02348	0.4492	0.960825	FALSE
AVPR2_Y124_G122D	QMVDMYASSYM	AVPR2_Y124	QMVGMYASSYM	G	-2	D	1.45667	1.23317	1.31408	1.33464	0.113163	1.41884	0.647827	1.61348	1.22671	0.51069	0.413	0.1895	0.2235	0.4173	0.620649	FALSE
AVPR2_Y124_G122R	QMVRMYASSYM	AVPR2_Y124	QMVGMYASSYM	G	-2	R	0.47673	0.554039	0.33392	0.454896	0.111672	1.41884	0.647827	1.61348	1.22671	0.51069	-1.168	0.1895	-1.357	0.465	0.043284	FALSE
AVPR2_Y124_M123K	QMVGKYASSYM	AVPR2_Y124	QMVGMYASSYM	M	-1	K	0.369298	0.848406	0.743276	0.65366	0.251812	1.41884	0.647827	1.61348	1.22671	0.51069	-0.7008	0.1895	-0.8903	0.5548	0.183853	FALSE
AVPR2_Y124_S126F	QMVGMYAFSYM	AVPR2_Y124	QMVGMYASSYM	S	2	F	0.512846	0.406842	0.767717	0.562468	0.185485	1.41884	0.647827	1.61348	1.22671	0.51069	-0.8807	0.1895	-1.07	0.4908	0.094689	FALSE
AVPR2_Y124_S127F	QMVGMYASFYM	AVPR2_Y124	QMVGMYASSYM	S	3	F	0.424809	0.46113	0.728942	0.538293	0.166102	1.41884	0.647827	1.61348	1.22671	0.51069	-0.936	0.1895	-1.126	0.4775	0.077907	FALSE
AVPR2_Y124_Y128S	QMVGMYASSSM	AVPR2_Y124	QMVGMYASSYM	Y	4	S	0.79455	0.657082	0.602562	0.684731	0.0989353	1.41884	0.647827	1.61348	1.22671	0.51069	-0.5562	0.1895	-0.7457	0.428	0.156401	FALSE
AVPR2_Y124_G122D_YF	QMVDMYASSFM	AVPR2_Y124_YF	QMVGMYASSFM	G	-2	D	0.563225	0.813056	0.744374	0.706885	0.129065	0.66349	0.504536	0.477028	0.548351	0.100657	-0.5176	-0.8822	0.3647	0.217	0.168206	FALSE
AVPR2_Y124_G122R_YF	QMVRMYASSFM	AVPR2_Y124_YF	QMVGMYASSFM	G	-2	R	0.588555	0.682233	0.441879	0.570889	0.121147	0.66349	0.504536	0.477028	0.548351	0.100657	-0.8316	-0.8822	0.05066	0.2355	0.840193	FALSE
AVPR2_Y124_M123K_YF	QMVGKYASSFM	AVPR2_Y124_YF	QMVGMYASSFM	M	-1	K	0.413166	0.612127	0.375099	0.466797	0.12729	0.66349	0.504536	0.477028	0.548351	0.100657	-1.133	-0.8822	-0.2504	0.2614	0.392229	FALSE
AVPR2_Y124_S126F_YF	QMVGMYAFSFM	AVPR2_Y124_YF	QMVGMYASSFM	S	2	F	0.331062	0.450308	0.278878	0.353416	0.0878738	0.66349	0.504536	0.477028	0.548351	0.100657	-1.529	-0.8822	-0.6472	0.25	0.060795	FALSE
AVPR2_Y124_S127F_YF	QMVGMYASFFM	AVPR2_Y124_YF	QMVGMYASSFM	S	3	F	0.612465	0.532182	0.661998	0.602215	0.0655124	0.66349	0.504536	0.477028	0.548351	0.100657	-0.7375	-0.8822	0.1448	0.1735	0.451118	FALSE
AXL_Y115_T112M	SDMGQYQCLVF	AXL_Y115	SDTGQYQCLVF	T	-3	M	0.359796	0.592369	0.360021	0.437395	0.134211	0.373506	0.502557	0.471139	0.449067	0.0672969	-1.235	-1.166	-0.06827	0.2726	0.814593	FALSE
B3GALNT1_Y269_E266A	KFADVYVGICL	B3GALNT1_Y269	KFEDVYVGICL	E	-3	A	0.291468	0.45316	0.525361	0.42333	0.119766	0.229197	0.458349	0.687244	0.458263	0.229023	-1.283	-1.264	-0.01906	0.5283	0.972946	FALSE
B3GALNT1_Y269_G271R	KFEDVYVRICL	B3GALNT1_Y269	KFEDVYVGICL	G	2	R	0.295646	0.549559	0.569784	0.471663	0.15277	0.229197	0.458349	0.687244	0.458263	0.229023	-1.144	-1.264	0.1196	0.5553	0.840038	FALSE
B4GALNT2_Y538_A533D	DLEKTYNTYRS	B4GALNT2_Y538	ALEKTYNTYRS	A	-5	D	0.284752	0.610709	0.393826	0.429762	0.165923	0.534793	0.534294	0.273773	0.44762	0.150556	-1.289	-1.225	-0.06395	0.4531	0.894579	FALSE
B4GALNT2_Y538_A533D_YF	DLEKTYNTFRS	B4GALNT2_Y538_YF	ALEKTYNTFRS	A	-5	D	0.481545	0.598605	0.438866	0.506339	0.0827052	0.470457	0.529648	0.371491	0.457199	0.0799076	-0.9942	-1.144	0.1502	0.2006	0.495569	FALSE
B4GALT4_Y113_Q116E	VSRGRYRPEEC	B4GALT4_Y113	VSRGRYRPQEC	Q	3	E	0.586673	0.364925	0.332607	0.428068	0.138303	0.477971	0.513797	0.298359	0.430042	0.115439	-1.271	-1.257	-0.01373	0.3532	0.970848	FALSE
B4GALT6_Y382_I379V	APVEDYGGGGG	B4GALT6_Y382	APIEDYGGGGG	I	-3	V	0.603269	0.367966	0.302506	0.42458	0.158173	0.595912	0.763565	0.143621	0.501033	0.320678	-1.299	-1.312	0.01307	0.8074	0.987858	FALSE
BACE1_Y260_V265A	RREWYYEVIIA	BACE1_Y260	RREWYYEVIIV	V	5	A	0.603858	0.250886	0.390296	0.415013	0.177779	0.683682	0.557524	0.392847	0.544684	0.145842	-1.36	-0.9132	-0.4468	0.4339	0.361318	FALSE
BACE1_Y260_V265A_YF	RREWFYEVIIA	BACE1_Y260_YF	RREWFYEVIIV	V	5	A	0.640766	0.32028	0.57524	0.512095	0.169317	0.603858	0.634424	0.33922	0.525834	0.162333	-1.027	-0.9813	-0.04619	0.425	0.918689	FALSE
BAD_Y110_A107S	WASQRYGRELR	BAD_Y110	WAAQRYGRELR	A	-3	S	0.379051	0.390267	0.204102	0.324473	0.104396	0.5297	0.621854	0.371022	0.507525	0.126878	-1.683	-1.011	-0.6724	0.3761	0.148362	FALSE
BAG3_Y114_P115S	HPFHVYSQPGM	BAG3_Y114	HPFHVYPQPGM	P	1	S	23.464	14.6176	16.2332	18.1049	4.7109	0.772168	0.689936	1.1875	0.8832	0.266716	4.148	-0.2202	4.368	0.316	0.000159	TRUE
BAG3_Y205_P209L	QLPRGYISILV	BAG3_Y205	QLPRGYISIPV	P	4	L	0.510782	0.797688	0.491058	0.599843	0.171623	0.732232	0.885479	1.04406	0.887258	0.155922	-0.7738	-0.1876	-0.5862	0.2688	0.094659	FALSE
BAG3_Y451_E455K	KTDKKYLMIKE	BAG3_Y451	KTDKKYLMIEE	E	4	K	0.585673	0.497709	0.4132	0.498861	0.0862422	0.450754	0.575803	0.391232	0.472596	0.0942045	-1.018	-1.1	0.0821	0.2183	0.725959	FALSE
BAG3_Y457_E455K	LMIKEYLTKEL	BAG3_Y457	LMIEEYLTKEL	E	-2	K	0.37079	0.995578	0.497768	0.621379	0.330227	0.556185	0.653348	0.33392	0.514484	0.163746	-0.8147	-1.014	0.1996	0.5134	0.717296	FALSE
BAG3_Y457_L462P	LMIEEYLTKEP	BAG3_Y457	LMIEEYLTKEL	L	5	P	0.760004	0.261339	0.636037	0.55246	0.259626	0.556185	0.653348	0.33392	0.514484	0.163746	-0.9949	-1.014	0.01938	0.5587	0.973996	FALSE
BAG3_Y93_I94F	QLRPGYFPIPV	BAG3_Y93	QLRPGYIPIPV	I	1	F	0.572815	0.529295	0.322911	0.475007	0.133504	0.492621	0.569644	0.416131	0.492799	0.0767567	-1.118	-1.033	-0.08477	0.29	0.784575	FALSE
BAP1_Y223_R227C	TAGEPYHDICF	BAP1_Y223	TAGEPYHDIRF	R	4	C	1.33666	1.30563	1.76216	1.46815	0.255089	2.14528	1.86393	1.79985	1.93635	0.183754	0.5402	0.9491	-0.4089	0.159	0.061879	FALSE
BARD1_Y156_K153E	SKEVRYVVSKA	BARD1_Y156	SKKVRYVVSKA	K	-3	E	0.517163	0.847147	0.46029	0.6082	0.208879	1.38001	0.817279	1.77437	1.32388	0.481005	-0.77	0.3336	-1.104	0.4258	0.060556	FALSE
BBS10_Y536_P539L	NRLTDYYELLL	BBS10_Y536	NRLTDYYEPLL	P	3	L	1.20106	1.11924	1.15349	1.15793	0.0410922	1.90692	2.18986	1.68133	1.92604	0.254805	0.2109	0.9372	-0.7263	0.114	0.003111	FALSE
BBS10_Y536_P539L_YF	NRLTDYFELLL	BBS10_Y536_YF	NRLTDYFEPLL	P	3	L	0.825109	0.769995	0.908078	0.834394	0.069508	0.703141	0.80349	0.625712	0.710781	0.089135	-0.2645	-0.5001	0.2356	0.125	0.132588	FALSE
BBS2_Y644_R643H	TMKSHYMELYD	BBS2_Y644	TMKSRYMELYD	R	-1	H	7.9455	9.58093	13.2555	10.2606	2.71946	3.97275	4.82739	5.99933	4.93316	1.01742	3.326	2.282	1.044	0.2757	0.019316	TRUE
BBS2_Y644_R643H_YF	TMKSHYMELFD	BBS2_Y644_YF	TMKSRYMELFD	R	-1	H	7.41098	6.16864	7.59955	7.05973	0.777438	3.74263	4.67891	6.24822	4.88992	1.26605	2.814	2.258	0.5556	0.2341	0.076543	FALSE
BBS2_Y648_R643H	HYMELYDLNRD	BBS2_Y648	RYMELYDLNRD	R	-5	H	2.54256	2.4773	2.28712	2.43566	0.132712	3.97275	5.46045	7.29172	5.57497	1.66244	1.283	2.435	-1.152	0.2571	0.010982	TRUE
BBS2_Y648_R643H_YF	HFMELYDLNRD	BBS2_Y648_YF	RFMELYDLNRD	R	-5	H	0.926975	0.716816	0.318019	0.653937	0.309309	0.63564	0.905976	0.146778	0.562798	0.384805	-0.7475	-1.188	0.4406	0.9286	0.659881	FALSE
BBS4_Y395_A393V	NALVQYQEMEK	BBS4_Y395	NALAQYQEMEK	A	-2	V	3.87927	5.54522	4.51972	4.64807	0.840357	2.85577	3.28541	3.06661	3.06926	0.21483	2.201	1.616	0.5856	0.1603	0.021726	FALSE
BBS4_Y43_K46R	LIHLHYIRRDY	BBS4_Y43	LIHLHYIRKDY	K	3	R	0.872067	0.631481	0.785109	0.762886	0.121823	1.44464	1.02213	2.66131	1.70936	0.851054	-0.4032	0.6581	-1.061	0.4263	0.067486	FALSE
BBS4_Y43_K46R_YF	LIHLHYIRRDF	BBS4_Y43_YF	LIHLHYIRKDF	K	3	R	0.977907	0.688706	0.896235	0.854283	0.149095	1.70261	0.794472	2.31094	1.60267	0.763156	-0.2428	0.5481	-0.7909	0.4826	0.176613	FALSE
BBS4_Y48_K46R	YIRRDYEACKA	BBS4_Y48	YIRKDYEACKA	K	-2	R	0.701494	0.505139	0.335209	0.513947	0.183301	1.15458	0.946739	0.285401	0.795573	0.453879	-1.025	-0.5602	-0.4644	0.7012	0.544015	FALSE
BBS4_Y48_K46R_YF	FIRRDYEACKA	BBS4_Y48_YF	FIRKDYEACKA	K	-2	R	1.23802	0.482473	0.325969	0.682154	0.487712	0.734809	0.714022	0.928271	0.792367	0.118154	-0.7869	-0.346	-0.4409	0.5837	0.492091	FALSE
BCAR1_Y410_S407T	VDTGVYAVPPP	BCAR1_Y410	VDSGVYAVPPP	S	-3	T	0.636808	0.478743	0.552655	0.556069	0.0790877	0.528517	0.491531	0.281106	0.433718	0.133454	-0.8564	-1.258	0.402	0.3113	0.266136	FALSE
BCCIP_Y257_E254Q	EEQFFYEKAIL	BCCIP_Y257	EEEFFYEKAIL	E	-3	Q	0.54097	0.533799	0.516129	0.530299	0.0127851	0.947348	0.646728	0.371022	0.655032	0.288253	-0.9154	-0.7124	-0.203	0.3932	0.632862	FALSE
BCHE_Y174_V170M	VMSMNYRVGAL	BCHE_Y174	VVSMNYRVGAL	V	-4	M	0.462136	0.59497	0.326783	0.461296	0.134095	0.405728	0.388276	0.54337	0.445791	0.0849551	-1.159	-1.182	0.02331	0.2932	0.940433	FALSE
BCHE_Y505_F502L	ANLAKYGNPNE	BCHE_Y505	ANFAKYGNPNE	F	-3	L	0.341517	0.708145	0.224059	0.424574	0.252505	0.508278	0.38556	0.251368	0.381736	0.128498	-1.402	-1.448	0.04583	0.5679	0.939547	FALSE
BCKDHA_Y345_R346C	DDSSAYCSVDE	BCKDHA_Y345	DDSSAYRSVDE	R	1	C	1.23213	1.07315	1.31183	1.2057	0.121512	1.04959	0.965608	0.643701	0.8863	0.214252	0.2649	-0.2054	0.4703	0.2341	0.114912	FALSE
BCL2_Y9_T7S	AGRSGYDNREI	BCL2_Y9	AGRTGYDNREI	T	-2	S	0.546253	0.557524	0.377541	0.493773	0.100817	0.524795	0.661677	0.325775	0.504082	0.168906	-1.04	-1.048	0.007826	0.3521	0.983331	FALSE
BCL6_Y157_G159S	QDIMAYRSREV	BCL6_Y157	QDIMAYRGREV	G	2	S	0.63564	0.557524	0.0681469	0.420437	0.307582	0.427834	0.578967	0.334539	0.447114	0.123349	-1.791	-1.198	-0.5929	1.069	0.608533	FALSE
BCLAF1_Y459_L461H	REEKNYKHKET	BCLAF1_Y459	REEKNYKLKET	L	2	H	0.567536	0.568674	0.735418	0.623876	0.0966001	0.609155	0.896021	0.375366	0.626847	0.260778	-0.6916	-0.7624	0.07075	0.3838	0.862707	FALSE
BCLAF1_Y459_Y459D	REEKNDKLKET	BCLAF1_Y459	REEKNYKLKET	Y	0	D	0.449093	0.888554	0.318019	0.551889	0.298836	0.609155	0.896021	0.375366	0.626847	0.260778	-0.9927	-0.7624	-0.2304	0.5671	0.70537	FALSE
BCLAF1_Y466_L461H	HKETGYVVERP	BCLAF1_Y466	LKETGYVVERP	L	-5	H	0.494965	0.511064	0.177041	0.394357	0.188373	0.667422	0.538132	0.296639	0.500731	0.188199	-1.494	-1.077	-0.4168	0.6121	0.533326	FALSE
BCO1_Y264_R267S	KMATAYIRSMS	BCO1_Y264	KMATAYIRRMS	R	3	S	0.534793	0.525846	0.330999	0.46388	0.115165	0.719154	0.226139	0.221183	0.388825	0.286084	-1.142	-1.599	0.4572	0.6058	0.492403	FALSE
BCO2_Y294_G289E	EMTRNYIIFIE	BCO2_Y294	GMTRNYIIFIE	G	-5	E	0.646234	0.557524	0.671656	0.625138	0.059919	0.966862	1.29556	1.28889	1.18377	0.187878	-0.6823	0.2304	-0.9127	0.1618	0.004858	FALSE
BCOR_Y90_P85L	LGNIVYSSLCG	BCOR_Y90	PGNIVYSSLCG	P	-5	L	0.548618	0.611612	0.492416	0.550882	0.0596302	0.538243	0.669029	0.530031	0.579101	0.0779877	-0.8658	-0.7965	-0.06937	0.1411	0.648825	FALSE
BCR_Y554_K558T	KVPELYEIHTE	BCR_Y554	KVPELYEIHKE	K	4	T	0.775265	0.646683	0.152142	0.524696	0.328985	0.809264	0.922206	0.370324	0.700598	0.291547	-1.238	-0.6184	-0.6191	0.8494	0.506448	FALSE
BCR_Y561_K558T	IHTEFYDGLFP	BCR_Y561	IHKEFYDGLFP	K	-3	T	0.765122	0.444277	0.681469	0.630289	0.166433	0.822675	1.13232	0.783689	0.912894	0.191023	-0.7033	-0.1513	-0.552	0.2909	0.130588	FALSE
BCR_Y751_D752E	GKTQQYECKWY	BCR_Y751	GKTQQYDCKWY	D	1	E	0.588995	0.621142	0.995337	0.735158	0.225895	0.607878	0.783112	0.882502	0.757831	0.139046	-0.4858	-0.4171	-0.06875	0.2881	0.823132	FALSE
BCR_Y751_D752E_YF	GKTQQYECKWF	BCR_Y751_YF	GKTQQYDCKWF	D	1	E	0.431405	0.558423	0.474065	0.487964	0.0646397	0.374207	0.557524	0.466985	0.466239	0.0916606	-1.043	-1.12	0.07641	0.1988	0.720242	FALSE
BCR_Y756_D752E	YECKWYIPLTD	BCR_Y756	YDCKWYIPLTD	D	-4	E	0.403683	0.542807	0.483128	0.476539	0.0697957	0.475684	0.706796	0.608454	0.596978	0.115983	-1.08	-0.7631	-0.3168	0.2078	0.202037	FALSE
BCR_Y756_D752E_YF	FECKWYIPLTD	BCR_Y756_YF	FDCKWYIPLTD	D	-4	E	0.808489	0.385978	0.48787	0.560779	0.22049	0.423541	0.517177	0.50531	0.482009	0.0509816	-0.9052	-1.058	0.1533	0.3276	0.6642	FALSE
BCR_Y910_Y910C	ESPGLCGFLNV	BCR_Y910	ESPGLYGFLNV	Y	0	C	0.300245	0.438843	0.392361	0.377149	0.0705402	0.467382	0.665931	0.304486	0.479267	0.181015	-1.425	-1.133	-0.2914	0.3646	0.468854	FALSE
BCS1L_Y181_R183C	WRPFGYPCRRR	BCS1L_Y181	WRPFGYPRRRR	R	2	C	0.431936	0.624499	0.249956	0.435464	0.187297	0.534151	0.322979	0.190811	0.349314	0.173178	-1.297	-1.642	0.3448	0.5754	0.581322	FALSE
BCS1L_Y181_R183H	WRPFGYPHRRR	BCS1L_Y181	WRPFGYPRRRR	R	2	H	0.629528	0.540369	0.263053	0.47765	0.191119	0.534151	0.322979	0.190811	0.349314	0.173178	-1.161	-1.642	0.4809	0.5784	0.452442	FALSE
BCS1L_Y181_R184C	WRPFGYPRCRR	BCS1L_Y181	WRPFGYPRRRR	R	3	C	0.5762	0.402845	0.398827	0.459291	0.101267	0.534151	0.322979	0.190811	0.349314	0.173178	-1.144	-1.642	0.4972	0.4629	0.343245	FALSE
BEST1_Y131_G135S	RTLIRYANLSN	BEST1_Y131	RTLIRYANLGN	G	4	S	2.08425	1.41887	1.26272	1.58861	0.436279	1.02824	0.682967	0.69493	0.802046	0.195982	0.6336	-0.345	0.9786	0.2913	0.028319	FALSE
BEST1_Y131_N133K	RTLIRYAKLGN	BEST1_Y131	RTLIRYANLGN	N	2	K	1.2202	0.627214	0.448968	0.765461	0.403775	1.02824	0.682967	0.69493	0.802046	0.195982	-0.5137	-0.345	-0.1687	0.4657	0.735452	FALSE
BEST1_Y148_A146K	VSTKVYKRFPS	BEST1_Y148	VSTAVYKRFPS	A	-2	K	0.568223	0.670174	0.728875	0.655758	0.0812904	0.53124	0.458739	0.251292	0.413757	0.145294	-0.6164	-1.343	0.7268	0.3469	0.104209	FALSE
BEST1_Y148_P152A	VSTAVYKRFAS	BEST1_Y148	VSTAVYKRFPS	P	4	A	0.45773	0.624695	0.388377	0.490267	0.121473	0.53124	0.458739	0.251292	0.413757	0.145294	-1.057	-1.343	0.2862	0.3868	0.500358	FALSE
BEST1_Y227_D228N	GHLYAYNWISI	BEST1_Y227	GHLYAYDWISI	D	1	N	0.475245	0.765202	0.97385	0.738099	0.250405	1.60409	1.16866	2.51	1.76092	0.684286	-0.4992	0.7448	-1.244	0.4414	0.04791	FALSE
BEST1_Y227_G222V	VHLYAYDWISI	BEST1_Y227	GHLYAYDWISI	G	-5	V	0.711683	1.11079	1.70692	1.17646	0.500857	1.60409	1.16866	2.51	1.76092	0.684286	0.1441	0.7448	-0.6007	0.4849	0.283139	FALSE
BEST1_Y227_L224M	GHMYAYDWISI	BEST1_Y227	GHLYAYDWISI	L	-3	M	1.79819	1.85093	3.58353	2.41088	1.01588	1.60409	1.16866	2.51	1.76092	0.684286	1.192	0.7448	0.4473	0.456	0.382136	FALSE
BEST1_Y227_L224P	GHPYAYDWISI	BEST1_Y227	GHLYAYDWISI	L	-3	P	4.63011	3.65698	4.03918	4.10876	0.490282	1.60409	1.16866	2.51	1.76092	0.684286	2.032	0.7448	1.287	0.3348	0.018385	TRUE
BEST1_Y227_S231R	GHLYAYDWIRI	BEST1_Y227	GHLYAYDWISI	S	4	R	1.79981	1.77892	2.32197	1.9669	0.307679	1.60409	1.16866	2.51	1.76092	0.684286	0.9647	0.7448	0.22	0.3436	0.556902	FALSE
BEST1_Y227_Y227C	GHLYACDWISI	BEST1_Y227	GHLYAYDWISI	Y	0	C	0.463804	0.77077	1.07716	0.770578	0.306678	1.60409	1.16866	2.51	1.76092	0.684286	-0.4589	0.7448	-1.204	0.4767	0.065	FALSE
BEST1_Y227_Y227N	GHLYANDWISI	BEST1_Y227	GHLYAYDWISI	Y	0	N	15.3751	12.8651	26.9044	18.3815	7.48697	1.60409	1.16866	2.51	1.76092	0.684286	4.126	0.7448	3.381	0.4529	0.001721	TRUE
BEST1_Y227_D228N_YF	GHLFAYNWISI	BEST1_Y227_YF	GHLFAYDWISI	D	1	N	0.867612	0.718115	1.16091	0.915545	0.225255	1.2091	0.92785	1.14277	1.09324	0.147021	-0.1558	0.1195	-0.2753	0.2326	0.302219	FALSE
BEST1_Y227_G222V_YF	VHLFAYDWISI	BEST1_Y227_YF	GHLFAYDWISI	G	-5	V	0.79455	0.893741	1.22718	0.971823	0.226637	1.2091	0.92785	1.14277	1.09324	0.147021	-0.06617	0.1195	-0.1856	0.2204	0.446981	FALSE
BEST1_Y227_L224M_YF	GHMFAYDWISI	BEST1_Y227_YF	GHLFAYDWISI	L	-3	M	1.06946	1.14658	1.24134	1.15246	0.0860905	1.2091	0.92785	1.14277	1.09324	0.147021	0.202	0.1195	0.08256	0.1317	0.564799	FALSE
BEST1_Y227_L224P_YF	GHPFAYDWISI	BEST1_Y227_YF	GHLFAYDWISI	L	-3	P	1.84679	1.59004	1.73144	1.72276	0.128594	1.2091	0.92785	1.14277	1.09324	0.147021	0.782	0.1195	0.6625	0.1319	0.007374	FALSE
BEST1_Y227_S231R_YF	GHLFAYDWIRI	BEST1_Y227_YF	GHLFAYDWISI	S	4	R	1.38332	1.24578	2.04678	1.55863	0.428314	1.2091	0.92785	1.14277	1.09324	0.147021	0.6062	0.1195	0.4867	0.247	0.120121	FALSE
BEST1_Y227_Y227C_YF	GHLFACDWISI	BEST1_Y227_YF	GHLFAYDWISI	Y	0	C	0.708807	0.767076	0.77127	0.749051	0.0349153	1.2091	0.92785	1.14277	1.09324	0.147021	-0.4179	0.1195	-0.5374	0.1226	0.011859	FALSE
BEST1_Y227_Y227N_YF	GHLFANDWISI	BEST1_Y227_YF	GHLFAYDWISI	Y	0	N	0.570733	0.663633	0.245934	0.493434	0.219316	1.2091	0.92785	1.14277	1.09324	0.147021	-1.141	0.1195	-1.261	0.4605	0.051989	FALSE
BEX1_Y43_A40V	LDVGEYCVPRG	BEX1_Y43	LDAGEYCVPRG	A	-3	V	0.428805	0.588497	0.491935	0.503079	0.0804275	0.426922	0.561192	0.370231	0.452782	0.0980717	-1.003	-1.165	0.1616	0.2202	0.503587	FALSE
BICD2_Y538_C542W	ELANLYHHVWM	BICD2_Y538	ELANLYHHVCM	C	4	W	0.79455	0.767862	0.885909	0.816107	0.0619057	0.519314	0.905022	0.925996	0.783444	0.228984	-0.2959	-0.4001	0.1042	0.2798	0.72849	FALSE
BIN1_Y150_D151N	RKLVDYNSARH	BIN1_Y150	RKLVDYDSARH	D	1	N	0.554686	0.856197	0.647099	0.685994	0.154473	0.490751	0.452578	0.216384	0.386571	0.148617	-0.5674	-1.46	0.8923	0.4182	0.099779	FALSE
BIN1_Y150_R145C	CKLVDYDSARH	BIN1_Y150	RKLVDYDSARH	R	-5	C	0.424628	0.6651	0.602171	0.563966	0.124705	0.490751	0.452578	0.216384	0.386571	0.148617	-0.8519	-1.46	0.6077	0.424	0.225076	FALSE
BIN1_Y150_R154Q	RKLVDYDSAQH	BIN1_Y150	RKLVDYDSARH	R	4	Q	0.550073	0.596241	0.477028	0.541114	0.0601092	0.490751	0.452578	0.216384	0.386571	0.148617	-0.8921	-1.46	0.5676	0.3874	0.216778	FALSE
BIN1_Y157_R154Q	SAQHHYESLQT	BIN1_Y157	SARHHYESLQT	R	-3	Q	35.2765	32.4431	41.461	36.3935	4.61152	41.4294	20.2703	41.6035	34.4344	12.2668	5.178	5.031	0.1472	0.3601	0.703594	FALSE
BIRC3_Y245_S248C	QDTSRYTVCNL	BIRC3_Y245	QDTSRYTVSNL	S	3	C	0.812815	1.45885	1.61456	1.29541	0.425127	0.512373	0.606004	0.240663	0.453013	0.189766	0.3123	-1.247	1.56	0.5129	0.038374	FALSE
BLM_Y296_T298M	FDDDDYDMDFV	BLM_Y296	FDDDDYDTDFV	T	2	M	0.595912	0.62284	0.236606	0.48512	0.21564	0.662125	0.753296	0.249426	0.554949	0.268488	-1.17	-1.002	-0.1675	0.6787	0.817217	FALSE
BMP15_Y235_Y235C	AFLLLCFNDTH	BMP15_Y235	AFLLLYFNDTH	Y	0	C	0.546709	0.71215	0.854286	0.704381	0.153936	0.357374	0.551668	0.789805	0.566282	0.216586	-0.5294	-0.8944	0.365	0.3799	0.391132	FALSE
BMPR1A_Y453_V450M	GIMEEYQLPYY	BMPR1A_Y453	GIVEEYQLPYY	V	-3	M	3.71771	4.55602	8.09009	5.4546	2.32056	3.4826	4.14484	5.44373	4.35706	0.997639	2.366	2.099	0.2674	0.3847	0.525215	FALSE
BMPR1A_Y453_V450M_YF	GIMEEYQLPFF	BMPR1A_Y453_YF	GIVEEYQLPFF	V	-3	M	0.657558	0.436786	0.37584	0.490062	0.148223	0.63564	0.482473	0.195409	0.43784	0.223483	-1.071	-1.354	0.283	0.5677	0.644285	FALSE
BMPR1A_Y457_M460T	EYQLPYYNTVP	BMPR1A_Y457	EYQLPYYNMVP	M	3	T	4.43167	4.15701	12.0585	6.88241	4.48477	2.91118	2.72861	5.57169	3.73716	1.59137	2.598	1.823	0.7758	0.5963	0.263146	FALSE
BMPR1A_Y457_M460T_YF	EFQLPYFNTVP	BMPR1A_Y457_YF	EFQLPYFNMVP	M	3	T	0.808996	0.550376	0.640394	0.666589	0.131285	1.31634	0.413832	0.522031	0.750735	0.492809	-0.6034	-0.6047	0.001288	0.5349	0.998193	FALSE
BMPR1A_Y458_M460T	YQLPYYNTVPS	BMPR1A_Y458	YQLPYYNMVPS	M	2	T	6.41506	5.83792	14.1928	8.81525	4.666	3.65493	2.72045	8.87833	5.08457	3.31855	3.018	2.155	0.8633	0.6543	0.257477	FALSE
BMPR1A_Y458_M460T_YF	FQLPFYNTVPS	BMPR1A_Y458_YF	FQLPFYNMVPS	M	2	T	3.04577	4.04594	10.322	5.80456	3.94403	1.45667	1.66348	2.79446	1.97154	0.720134	2.33	0.9198	1.41	0.6043	0.079908	FALSE
BMPR1A_Y467_M470T	PSDPSYEDTRE	BMPR1A_Y467	PSDPSYEDMRE	M	3	T	1.92365	2.17434	1.0954	1.73113	0.564649	1.34462	1.1708	0.853629	1.12302	0.24896	0.732	0.1421	0.5898	0.3611	0.177705	FALSE
BMPR2_Y247_R248G	NEKNIYGVPLM	BMPR2_Y247	NEKNIYRVPLM	R	1	G	0.483953	0.715804	0.235334	0.478364	0.240284	0.516457	0.565182	0.442682	0.508107	0.0616755	-1.206	-0.984	-0.2215	0.4811	0.669172	FALSE
BMPR2_Y979_R974P	PVKTPYSLKRW	BMPR2_Y979	RVKTPYSLKRW	R	-5	P	0.546253	0.930705	1.49923	0.992063	0.479443	1.36563	0.816837	3.99672	2.05973	1.69978	-0.1306	0.7188	-0.8494	0.7952	0.345632	FALSE
BMS1_Y651_K652R	KEEEDYREENN	BMS1_Y651	KEEEDYKEENN	K	1	R	0.542163	0.66206	0.168363	0.457529	0.2575	0.664296	0.557524	0.274653	0.498824	0.201345	-1.35	-1.099	-0.2504	0.7289	0.748485	FALSE
BMX_Y216_S212R	TRLAQYDSNSK	BMX_Y216	TSLAQYDSNSK	S	-4	R	0.878187	0.766595	0.266725	0.637169	0.325629	0.42376	0.631368	0.260197	0.438442	0.186021	-0.8258	-1.281	0.4557	0.6572	0.526269	FALSE
BOD1_Y82_A81V	DTKPVYQNLRQ	BOD1_Y82	DTKPAYQNLRQ	A	-1	V	3.11009	2.97086	3.7846	3.28852	0.435222	0.631099	0.901778	1.0606	0.864493	0.217165	1.709	-0.2428	1.952	0.2458	0.001361	TRUE
BPGM_Y92_R90C	LNECHYGALIG	BPGM_Y92	LNERHYGALIG	R	-2	C	0.375605	0.352928	0.273937	0.334157	0.0533703	0.727039	0.724457	0.387721	0.613072	0.195164	-1.594	-0.7639	-0.8305	0.3321	0.066707	FALSE
BPIFB2_Y36_K31M	MAALSYVSEIG	BPIFB2_Y36	KAALSYVSEIG	K	-5	M	0.568364	0.564626	0.300672	0.477887	0.153484	0.489499	0.616014	0.265347	0.456953	0.177585	-1.124	-1.215	0.09005	0.4736	0.858457	FALSE
BRCA2_Y57_K53R	HRNNNYEPNLF	BRCA2_Y57	HKNNNYEPNLF	K	-4	R	0.742448	0.624094	0.636037	0.667526	0.0651582	0.621193	0.392009	0.227156	0.413453	0.197892	-0.5875	-1.392	0.8045	0.4269	0.132589	FALSE
BRCA2_Y57_N60S	HKNNNYEPSLF	BRCA2_Y57	HKNNNYEPNLF	N	3	S	1.18433	0.595854	0.817762	0.865982	0.297186	0.621193	0.392009	0.227156	0.413453	0.197892	-0.2644	-1.392	1.128	0.5079	0.090589	FALSE
BRCA2_Y71_A75P	QRKPSYNQLPS	BRCA2_Y71	QRKPSYNQLAS	A	4	P	0.578886	0.426184	0.264491	0.423187	0.157219	0.701073	0.330113	2.14663	1.05927	0.959771	-1.313	-0.3364	-0.9762	0.8508	0.315175	FALSE
BRD1_Y33_R38G	RETLTYAQAQG	BRD1_Y33	RETLTYAQAQR	R	5	G	#DIV/0!	#DIV/0!	#DIV/0!	#DIV/0!	#DIV/0!	0.850308	0.75124	0.656391	0.752646	0.0969661		-0.418				#DIV/0!
BRD2_Y715_P714L	KPRKLYTIKKP	BRD2_Y715	KPRKPYTIKKP	P	-1	L	1.20772	0.645844	1.06218	0.971914	0.291609	1.07832	1.04357	3.56454	1.89548	1.44556	-0.09048	0.668	-0.7585	0.6448	0.304681	FALSE
BRD4_Y599_T598S	KPPPSYESEEE	BRD4_Y599	KPPPTYESEEE	T	-1	S	1.04694	0.789826	0.447822	0.761528	0.300558	0.755926	0.927604	0.501663	0.728398	0.214301	-0.4777	-0.5024	0.0247	0.4447	0.958378	FALSE
BRDT_Y291_H288Y	KKYFSYAWPFY	BRDT_Y291	KKHFSYAWPFY	H	-3	Y	1.55732	1.05072	1.68755	1.43186	0.336442	0.871442	1.1039	2.5927	1.52268	0.933927	0.4885	0.4395	0.04894	0.5223	0.929852	FALSE
BRDT_Y291_H288Y_YF	KKFFSYAWPFF	BRDT_Y291_YF	KKHFSYAWPFF	H	-3	F	0.833174	0.719002	1.39405	0.982077	0.361321	1.27023	0.766271	3.27698	1.77116	1.3282	-0.08665	0.5578	-0.6444	0.6793	0.396476	FALSE
BRDT_Y331_K336T	MDNQEYKDAYT	BRDT_Y331	MDNQEYKDAYK	K	5	T	0.682641	0.707626	0.332607	0.574292	0.209678	0.684957	0.519853	0.292058	0.498956	0.197281	-0.8793	-1.088	0.2092	0.507	0.701079	FALSE
BRDT_Y331_K336T_YF	MDNQEYKDAFT	BRDT_Y331_YF	MDNQEYKDAFK	K	5	T	0.513717	0.964426	0.37171	0.616618	0.309466	0.40969	0.922798	0.264491	0.532326	0.345864	-0.8137	-1.107	0.2937	0.6649	0.681515	FALSE
BRDT_Y335_K336T	EYKDAYTFAAD	BRDT_Y335	EYKDAYKFAAD	K	1	T	0.829095	0.615119	0.387235	0.610483	0.220967	1.43695	0.743365	0.410978	0.863765	0.523476	-0.7801	-0.3959	-0.3842	0.6116	0.564036	FALSE
BRDT_Y335_K336T_YF	EFKDAYTFAAD	BRDT_Y335_YF	EFKDAYKFAAD	K	1	T	0.831221	0.575734	0.701024	0.70266	0.127751	0.510081	0.516395	0.351775	0.459417	0.0932743	-0.5252	-1.144	0.6187	0.2376	0.05979	FALSE
BRIP1_Y916_S919P	VTSLKYSTPPY	BRIP1_Y916	VTSLKYSTSPY	S	3	P	0.418634	0.669029	0.2157	0.434454	0.227078	0.371366	0.574317	0.34484	0.430174	0.125534	-1.35	-1.255	-0.09461	0.5264	0.866107	FALSE
BRIP1_Y916_S919P_YF	VTSLKYSTPPF	BRIP1_Y916_YF	VTSLKYSTSPF	S	3	P	0.525496	0.569822	0.381622	0.492314	0.09839	0.572815	0.622766	0.169412	0.454998	0.248582	-1.043	-1.349	0.3063	0.6321	0.653272	FALSE
BRIP1_Y921_S919P	YSTPPYLLEAA	BRIP1_Y921	YSTSPYLLEAA	S	-2	P	0.877315	1.00846	1.35821	1.08133	0.248587	0.833308	0.582413	0.470115	0.628612	0.185952	0.08834	-0.7106	0.799	0.3043	0.05847	FALSE
BRIP1_Y921_S919P_YF	FSTPPYLLEAA	BRIP1_Y921_YF	FSTSPYLLEAA	S	-2	P	0.738298	0.774665	0.307053	0.606672	0.260114	0.718878	0.732828	0.279933	0.577213	0.257547	-0.8365	-0.9205	0.08399	0.6311	0.900556	FALSE
BSCL2_Y213_A212P	QLYGPYLRIHA	BSCL2_Y213	QLYGAYLRIHA	A	-1	P	1.53613	1.05636	0.61837	1.07029	0.459038	1.01125	1.09209	1.28467	1.12934	0.140466	0.001648	0.1682	-0.1666	0.3943	0.694433	FALSE
BSCL2_Y213_A212P_YF	QLFGPYLRIHA	BSCL2_Y213_YF	QLFGAYLRIHA	A	-1	P	1.3724	1.15604	0.98171	1.17005	0.195723	0.697915	0.634107	1.58354	0.971853	0.530693	0.2131	-0.171	0.3841	0.4416	0.433531	FALSE
BST2_Y6_T4I	MASISYDYCRV	BST2_Y6	MASTSYDYCRV	T	-2	I	0.774306	1.25443	1.64098	1.22324	0.434176	1.70261	1.80932	1.85641	1.78945	0.0788067	0.2242	0.8386	-0.6144	0.3192	0.126534	FALSE
BST2_Y6_T4I_YF	MASISYDFCRV	BST2_Y6_YF	MASTSYDFCRV	T	-2	I	0.520407	0.763168	0.732073	0.671883	0.1321	1.09855	1.42232	2.46563	1.66217	0.714401	-0.5941	0.6486	-1.243	0.3859	0.032272	FALSE
BST2_Y8_T4I	SISYDYCRVPM	BST2_Y8	STSYDYCRVPM	T	-4	I	0.753654	0.928523	0.811394	0.83119	0.0890997	1.15315	1.64742	1.80885	1.53647	0.341637	-0.2722	0.5936	-0.8658	0.2166	0.016173	FALSE
BST2_Y8_T4I_YF	SISFDYCRVPM	BST2_Y8_YF	STSFDYCRVPM	T	-4	I	0.44769	0.50732	0.216253	0.390421	0.153753	0.55132	0.613579	0.510002	0.558301	0.0521401	-1.449	-0.845	-0.6042	0.3913	0.197427	FALSE
BTD_Y536_R538C	VTAALYGCLYE	BTD_Y536	VTAALYGRLYE	R	2	C	0.417874	0.564323	0.658607	0.546935	0.121304	1.13389	0.620005	1.61735	1.12375	0.498751	-0.8956	0.06175	-0.9573	0.4474	0.099105	FALSE
BTD_Y536_T532M	VMAALYGRLYE	BTD_Y536	VTAALYGRLYE	T	-4	M	1.05697	0.967468	2.54654	1.52366	0.886971	1.13389	0.620005	1.61735	1.12375	0.498751	0.4603	0.06175	0.3985	0.6014	0.543789	FALSE
BTD_Y536_R538C_YF	VTAALYGCLFE	BTD_Y536_YF	VTAALYGRLFE	R	2	C	0.334035	0.657082	0.569737	0.520285	0.167104	0.511642	0.590319	0.778598	0.626853	0.137176	-0.9998	-0.6961	-0.3037	0.3462	0.429873	FALSE
BTD_Y536_T532M_YF	VMAALYGRLFE	BTD_Y536_YF	VTAALYGRLFE	T	-4	M	0.738716	1.01431	1.77182	1.17495	0.534957	0.511642	0.590319	0.778598	0.626853	0.137176	0.1363	-0.6961	0.8324	0.4095	0.111894	FALSE
BTK_Y334_Y334S	GVIRHSVVCST	BTK_Y334	GVIRHYVVCST	Y	0	S	0.506262	0.796463	0.453999	0.585575	0.184494	0.461351	0.515104	0.50922	0.495225	0.0294825	-0.8165	-1.016	0.1991	0.2534	0.476004	FALSE
BTK_Y361_H362Q	PELINYQQHNS	BTK_Y361	PELINYHQHNS	H	1	Q	0.381384	0.672665	0.420432	0.491493	0.158109	0.571083	0.541126	0.286217	0.466142	0.156538	-1.071	-1.166	0.09541	0.4078	0.826495	FALSE
BTK_Y361_H364P	PELINYHQPNS	BTK_Y361	PELINYHQHNS	H	3	P	1.1521	0.473895	0.487178	0.70439	0.387783	0.571083	0.541126	0.286217	0.466142	0.156538	-0.6369	-1.166	0.5295	0.5286	0.373192	FALSE
BTK_Y361_L358F	PEFINYHQHNS	BTK_Y361	PELINYHQHNS	L	-3	F	0.698656	0.745055	0.381622	0.608444	0.197799	0.571083	0.541126	0.286217	0.466142	0.156538	-0.7772	-1.166	0.3891	0.4438	0.430102	FALSE
BTK_Y361_N365Y	PELINYHQHYS	BTK_Y361	PELINYHQHNS	N	4	Y	0.735694	0.819888	0.418216	0.657933	0.211826	0.571083	0.541126	0.286217	0.466142	0.156538	-0.6623	-1.166	0.504	0.4394	0.315306	FALSE
BTK_Y361_S366F	PELINYHQHNF	BTK_Y361	PELINYHQHNS	S	5	F	0.617983	0.452046	0.23082	0.433617	0.194238	0.571083	0.541126	0.286217	0.466142	0.156538	-1.318	-1.166	-0.152	0.5274	0.787507	FALSE
BTK_Y361_Y361C	PELINCHQHNS	BTK_Y361	PELINYHQHNS	Y	0	C	0.842223	0.871131	0.210216	0.64119	0.373514	0.571083	0.541126	0.286217	0.466142	0.156538	-0.8989	-1.166	0.2674	0.7477	0.738682	FALSE
BTK_Y361_N365Y_YF	PELINYHQHFS	BTK_Y361	PELINYHQHNS	N	4	F	0.365493	0.820507	0.4846	0.556867	0.235958	0.571083	0.541126	0.286217	0.466142	0.156538	-0.9275	-1.166	0.2388	0.4683	0.636956	FALSE
BTK_Y375_I370M	MSRLKYPVSQQ	BTK_Y375	ISRLKYPVSQQ	I	-5	M	0.595912	0.595785	0.632464	0.608054	0.02114	0.486282	0.621502	1.38656	0.831449	0.485473	-0.7183	-0.4183	-0.3	0.4574	0.547639	FALSE
BTK_Y375_R372G	ISGLKYPVSQQ	BTK_Y375	ISRLKYPVSQQ	R	-3	G	0.356474	0.592369	0.302608	0.41715	0.154116	0.486282	0.621502	1.38656	0.831449	0.485473	-1.323	-0.4183	-0.9044	0.5417	0.170338	FALSE
BTK_Y40_Y39S	HKLSSYEYDFE	BTK_Y40	HKLSYYEYDFE	Y	-1	S	2.0542	0.845578	1.08269	1.32749	0.64042	3.70033	3.06638	3.4346	3.40044	0.318353	0.3037	1.761	-1.458	0.3896	0.020098	TRUE
BTK_Y40_Y40C	HKLSYCEYDFE	BTK_Y40	HKLSYYEYDFE	Y	0	C	0.819379	0.894631	1.02888	0.914298	0.106128	3.70033	3.06638	3.4346	3.40044	0.318353	-0.1357	1.761	-1.897	0.1239	0.000106	TRUE
BTK_Y40_Y40N	HKLSYNEYDFE	BTK_Y40	HKLSYYEYDFE	Y	0	N	0.926975	0.836286	0.607127	0.790129	0.164844	3.70033	3.06638	3.4346	3.40044	0.318353	-0.3624	1.761	-2.124	0.2	0.000445	TRUE
BTK_Y40_Y39S_YF	HKLSSYEFDFE	BTK_Y40_YF	HKLSFYEFDFE	F	-1	S	4.55256	2.98061	1.47976	3.00431	1.53653	3.18923	3.4951	3.12718	3.27051	0.196962	1.443	1.708	-0.2653	0.4753	0.606564	FALSE
BTK_Y40_Y40C_YF	HKLSFCEFDFE	BTK_Y40_YF	HKLSFYEFDFE	Y	0	C	0.570733	0.870772	0.425075	0.622193	0.227261	3.18923	3.4951	3.12718	3.27051	0.196962	-0.7477	1.708	-2.455	0.3043	0.001281	TRUE
BTK_Y40_Y40N_YF	HKLSFNEFDFE	BTK_Y40_YF	HKLSFYEFDFE	Y	0	N	0.416193	0.616932	0.379176	0.470767	0.127929	3.18923	3.4951	3.12718	3.27051	0.196962	-1.12	1.708	-2.828	0.2208	0.000214	TRUE
BTK_Y425_I429N	KWRGQYDVANK	BTK_Y425	KWRGQYDVAIK	I	4	N	0.702663	1.23483	1.65125	1.19625	0.475469	1.27309	0.828542	1.53596	1.21253	0.357577	0.1729	0.232	-0.05912	0.4477	0.901318	FALSE
BTK_Y425_K430E	KWRGQYDVAIE	BTK_Y425	KWRGQYDVAIK	K	5	E	2.11601	2.52526	4.58082	3.07403	1.32087	1.27309	0.828542	1.53596	1.21253	0.357577	1.538	0.232	1.306	0.4279	0.03796	TRUE
BTK_Y425_K430R	KWRGQYDVAIR	BTK_Y425	KWRGQYDVAIK	K	5	R	1.13601	1.42201	2.64799	1.73534	0.803215	1.27309	0.828542	1.53596	1.21253	0.357577	0.6989	0.232	0.4669	0.4503	0.358405	FALSE
BTK_Y461_G462D	KLVQLYDVCTK	BTK_Y461	KLVQLYGVCTK	G	1	D	1.01002	0.873811	0.759479	0.881104	0.12543	0.73379	0.962996	0.949008	0.881931	0.128485	-0.1924	-0.1922	-0.0002241	0.1741	0.999035	FALSE
BTK_Y461_G462V	KLVQLYVVCTK	BTK_Y461	KLVQLYGVCTK	G	1	V	0.416893	0.521644	0.507013	0.48185	0.0567277	0.73379	0.962996	0.949008	0.881931	0.128485	-1.06	-0.1922	-0.8682	0.1629	0.005973	FALSE
BTK_Y511_A508D	CEDMEYLESKQ	BTK_Y511	CEAMEYLESKQ	A	-3	D	0.421885	0.552799	0.387361	0.454015	0.0872737	0.407594	0.415669	0.382765	0.402009	0.017148	-1.156	-1.316	0.1594	0.1587	0.372091	FALSE
BTK_Y511_A508T	CETMEYLESKQ	BTK_Y511	CEAMEYLESKQ	A	-3	T	0.388544	0.473758	0.418955	0.427086	0.0431851	0.407594	0.415669	0.382765	0.402009	0.017148	-1.232	-1.316	0.08333	0.09077	0.410513	FALSE
BTK_Y511_C506R	REAMEYLESKQ	BTK_Y511	CEAMEYLESKQ	C	-5	R	0.583233	0.413919	0.477028	0.491394	0.0855663	0.407594	0.415669	0.382765	0.402009	0.017148	-1.039	-1.316	0.2762	0.1479	0.135345	FALSE
BTK_Y511_C506Y	YEAMEYLESKQ	BTK_Y511	CEAMEYLESKQ	C	-5	Y	12.0117	7.48476	10.5034	9.99995	2.30509	0.407594	0.415669	0.382765	0.402009	0.017148	3.294	-1.316	4.61	0.2062	2.4e-05	TRUE
BTK_Y511_L512P	CEAMEYPESKQ	BTK_Y511	CEAMEYLESKQ	L	1	P	0.76972	0.759386	0.449431	0.659512	0.182009	0.407594	0.415669	0.382765	0.402009	0.017148	-0.6428	-1.316	0.6727	0.2581	0.059613	FALSE
BTK_Y511_L512Q	CEAMEYQESKQ	BTK_Y511	CEAMEYLESKQ	L	1	Q	0.452893	0.523735	0.335828	0.437485	0.0948962	0.407594	0.415669	0.382765	0.402009	0.017148	-1.217	-1.316	0.0989	0.1921	0.633823	FALSE
BTK_Y511_M509I	CEAIEYLESKQ	BTK_Y511	CEAMEYLESKQ	M	-2	I	0.595912	0.692744	0.630359	0.639672	0.0490832	0.407594	0.415669	0.382765	0.402009	0.017148	-0.6474	-1.316	0.6682	0.07283	0.000784	FALSE
BTK_Y511_M509V	CEAVEYLESKQ	BTK_Y511	CEAMEYLESKQ	M	-2	V	0.465494	0.593311	0.557653	0.538819	0.065957	0.407594	0.415669	0.382765	0.402009	0.017148	-0.8996	-1.316	0.416	0.111	0.019967	FALSE
BTK_Y511_C506Y_YF	FEAMEYLESKQ	BTK_Y511	CEAMEYLESKQ	C	-5	F	0.536491	0.57326	0.342961	0.484238	0.123722	0.407594	0.415669	0.382765	0.402009	0.017148	-1.082	-1.316	0.2339	0.2355	0.376791	FALSE
BTK_Y617_A622P	QGLRLYRPHLP	BTK_Y617	QGLRLYRPHLA	A	5	P	0.813929	0.693505	0.834799	0.780744	0.0762686	0.807365	0.70324	1.4547	0.988435	0.407139	-0.3618	-0.09197	-0.2699	0.3323	0.462209	FALSE
BTK_Y617_G613D	QDLRLYRPHLA	BTK_Y617	QGLRLYRPHLA	G	-4	D	0.335841	0.789826	0.617865	0.581177	0.229205	0.807365	0.70324	1.4547	0.988435	0.407139	-0.8697	-0.09197	-0.7778	0.4877	0.186024	FALSE
BTK_Y617_P619A	QGLRLYRAHLA	BTK_Y617	QGLRLYRPHLA	P	2	A	0.557371	0.886751	2.19848	1.2142	0.868173	0.807365	0.70324	1.4547	0.988435	0.407139	0.03994	-0.09197	0.1319	0.6644	0.852306	FALSE
BTK_Y617_P619S	QGLRLYRSHLA	BTK_Y617	QGLRLYRPHLA	P	2	S	0.630966	0.599761	1.86311	1.03128	0.720556	0.807365	0.70324	1.4547	0.988435	0.407139	-0.1681	-0.09197	-0.0761	0.6227	0.908632	FALSE
BTK_Y617_P619T	QGLRLYRTHLA	BTK_Y617	QGLRLYRPHLA	P	2	T	0.725027	0.683163	1.8383	1.08216	0.65517	0.807365	0.70324	1.4547	0.988435	0.407139	-0.04507	-0.09197	0.04689	0.5632	0.937643	FALSE
BTNL2_Y91_W94R	MQMEEYRGRVE	BTNL2_Y91	MQMEEYRGWVE	W	3	R	0.618707	0.396135	0.208876	0.407906	0.205169	0.370064	0.45717	0.346162	0.391132	0.0584257	-1.429	-1.365	-0.06468	0.4705	0.897283	FALSE
BUB1_Y538_N534D	GDKENYGLPQP	BUB1_Y538	GNKENYGLPQP	N	-4	D	0.756714	0.552362	0.244791	0.517955	0.25769	0.397275	0.491933	0.23564	0.374949	0.129597	-1.096	-1.48	0.3839	0.5786	0.543295	FALSE
C1orf162_Y120_A121V	GESLTYVSTTF	C1orf162_Y120	GESLTYASTTF	A	1	V	0.681043	0.675602	0.199355	0.518667	0.276545	1.0371	0.520043	0.390296	0.649145	0.342182	-1.149	-0.7494	-0.3995	0.7224	0.609718	FALSE
C1QBP_Y188_C186S	VLDSHYPEDEV	C1QBP_Y188	VLDCHYPEDEV	C	-2	S	0.737525	0.665615	0.316907	0.573349	0.224977	0.631286	0.555121	0.216831	0.467746	0.220611	-0.8948	-1.239	0.3446	0.6193	0.60759	FALSE
C1QTNF1_Y145_S143N	RCKNHYAAFSV	C1QTNF1_Y145	RCKSHYAAFSV	S	-2	N	0.989931	1.2823	2.7239	1.66538	0.928289	1.00576	0.872025	2.15081	1.34286	0.70289	0.5966	0.3052	0.2914	0.596	0.650502	FALSE
C3orf33_Y164_S160N	VNKGGYFSVNL	C3orf33_Y164	VSKGGYFSVNL	S	-4	N	1.43228	1.4829	1.29796	1.40438	0.095574	2.18677	2.26712	1.72746	2.06045	0.291161	0.4877	1.033	-0.5451	0.1358	0.015935	FALSE
C4BPA_Y470_W473L	KLSCSYSHLSA	C4BPA_Y470	KLSCSYSHWSA	W	3	L	0.56123	0.589612	0.743109	0.631317	0.0978495	0.762768	0.891577	0.541308	0.731885	0.177165	-0.6746	-0.4806	-0.194	0.2466	0.475298	FALSE
C5orf64_Y60_A57T	LTTEVYFPSIK	C5orf64_Y60	LTAEVYFPSIK	A	-3	T	0.761443	0.798273	0.130949	0.563555	0.3751	0.460839	0.479635	0.419207	0.453227	0.0309248	-1.217	-1.144	-0.07308	0.8601	0.936371	FALSE
C7orf57_Y70_A74S	ETDSEYVKLSK	C7orf57_Y70	ETDSEYVKLAK	A	4	S	0.770472	1.04536	0.443747	0.753192	0.301177	0.698241	0.567634	0.171803	0.479226	0.274128	-0.4948	-1.292	0.7973	0.7269	0.334277	FALSE
C9orf24_Y126_R129W	NKYTTYLPWLP	C9orf24_Y126	NKYTTYLPRLP	R	3	W	0.5297	1.00119	0.686063	0.738983	0.240157	0.857753	0.734918	1.38049	0.991054	0.342809	-0.4862	-0.06684	-0.4194	0.3821	0.334081	FALSE
C9orf24_Y126_R129W_YF	NKFTTYLPWLP	C9orf24_Y126_YF	NKFTTYLPRLP	R	3	W	0.568937	1.02683	0.849977	0.815249	0.230915	0.938143	0.725274	0.809745	0.824388	0.107187	-0.3367	-0.2867	-0.04999	0.2732	0.863712	FALSE
CABP5_Y62_T65R	MRTMGYMPREM	CABP5_Y62	MRTMGYMPTEM	T	3	R	0.485751	0.629032	0.326114	0.480299	0.151533	0.422788	0.487833	0.311216	0.407279	0.0893241	-1.109	-1.321	0.2115	0.3355	0.562678	FALSE
CACNA1A_Y794_M797T	SREALYNETDP	CACNA1A_Y794	SREALYNEMDP	M	3	T	0.913361	0.8031	0.577004	0.764488	0.17147	1.21954	1.04903	1.5794	1.28266	0.270764	-0.4135	0.3383	-0.7517	0.262	0.04552	FALSE
CACNA1H_Y519_H516Y	VHYLVYHHHHH	CACNA1H_Y519	VHHLVYHHHHH	H	-3	Y	0.569	0.735079	1.6961	1.00006	0.608481	0.619281	0.801729	2.04155	1.15419	0.773873	-0.1651	0.006505	-0.1716	0.7068	0.820118	FALSE
CACNA1H_Y519_H516Y_YF	VHFLVYHHHHH	CACNA1H_Y519	VHHLVYHHHHH	H	-3	F	0.484179	0.5854	1.30481	0.791464	0.447444	0.619281	0.801729	2.04155	1.15419	0.773873	-0.4784	0.006505	-0.4849	0.6822	0.51649	FALSE
CACNB4_Y103_C104F	KTNVSYFGALD	CACNB4_Y103	KTNVSYCGALD	C	1	F	0.457138	0.638218	0.232777	0.442711	0.203105	0.553777	0.61462	0.483794	0.55073	0.0654658	-1.293	-0.8675	-0.4259	0.4395	0.387376	FALSE
CAD_Y735_Y735C	EPSVDCCVVKI	CAD_Y735	EPSVDYCVVKI	Y	0	C	0.707343	0.599944	0.173465	0.493584	0.282384	0.862654	0.986068	0.204047	0.684256	0.420427	-1.255	-0.8421	-0.4125	0.969	0.692241	FALSE
CAGE1_Y438_V435L	KSLSQYLEMDK	CAGE1_Y438	KSVSQYLEMDK	V	-3	L	1.28434	1.33	1.58016	1.39816	0.159254	1.29841	1.67257	2.74123	1.90407	0.748751	0.4775	0.8579	-0.3804	0.3298	0.312962	FALSE
CALCOCO2_Y358_P357L	FNSLLYQVPTS	CALCOCO2_Y358	FNSLPYQVPTS	P	-1	L	0.514652	0.742134	0.357184	0.53799	0.193534	1.03022	1.0213	0.477028	0.842851	0.316844	-0.9579	-0.3315	-0.6265	0.4778	0.260046	FALSE
CALM1_Y100_N98S	KDGSGYISAAE	CALM1_Y100	KDGNGYISAAE	N	-2	S	0.491864	0.538431	0.365651	0.465315	0.0893968	0.732326	0.638543	0.341288	0.570719	0.204151	-1.123	-0.8825	-0.2403	0.3787	0.560237	FALSE
CALM1_Y139_E141G	DGQVNYEGFVQ	CALM1_Y139	DGQVNYEEFVQ	E	2	G	0.698016	0.571872	0.487324	0.585737	0.106028	0.447956	0.515083	0.234229	0.399089	0.146665	-0.7873	-1.403	0.6159	0.381	0.18127	FALSE
CALM1_Y139_F142L	DGQVNYEELVQ	CALM1_Y139	DGQVNYEEFVQ	F	3	L	0.994856	0.866696	0.372315	0.744622	0.328734	0.447956	0.515083	0.234229	0.399089	0.146665	-0.5464	-1.403	0.8568	0.5649	0.203931	FALSE
CALM2_Y100_D96V	KVGNGYISAAE	CALM2_Y100	KDGNGYISAAE	D	-4	V	0.583751	0.584815	0.421793	0.53012	0.093815	0.732326	0.638543	0.341288	0.570719	0.204151	-0.932	-0.8825	-0.04946	0.3735	0.90104	FALSE
CALM2_Y100_N98I	KDGIGYISAAE	CALM2_Y100	KDGNGYISAAE	N	-2	I	0.662125	0.686183	0.445918	0.598075	0.13232	0.732326	0.638543	0.341288	0.570719	0.204151	-0.7678	-0.8825	0.1147	0.3933	0.784977	FALSE
CALM2_Y100_N98S	KDGSGYISAAE	CALM2_Y100	KDGNGYISAAE	N	-2	S	0.491864	0.538431	0.365651	0.465315	0.0893968	0.732326	0.638543	0.341288	0.570719	0.204151	-1.123	-0.8825	-0.2403	0.3787	0.560237	FALSE
CALM2_Y139_D134H	HGQVNYEEFVQ	CALM2_Y139	DGQVNYEEFVQ	D	-5	H	1.14509	0.72907	0.610596	0.828251	0.280709	0.447956	0.515083	0.234229	0.399089	0.146665	-0.324	-1.403	1.079	0.4423	0.071197	FALSE
CALM2_Y139_Q136P	DGPVNYEEFVQ	CALM2_Y139	DGQVNYEEFVQ	Q	-3	P	0.481054	0.55576	0.216831	0.417881	0.178076	0.447956	0.515083	0.234229	0.399089	0.146665	-1.37	-1.403	0.03372	0.5486	0.953942	FALSE
CALM3_Y100_A103V	KDGNGYISVAE	CALM3_Y100	KDGNGYISAAE	A	3	V	2.86387	2.73488	1.9011	2.49995	0.522616	0.732326	0.638543	0.341288	0.570719	0.204151	1.299	-0.8825	2.181	0.3872	0.004885	TRUE
CAMK2A_Y106_E109D	IVAREYYSDAD	CAMK2A_Y106	IVAREYYSEAD	E	3	D	2.53305	2.54554	4.23406	3.10422	0.978493	2.49287	2.79602	4.29988	3.19625	0.967712	1.59	1.635	-0.04486	0.3432	0.902301	FALSE
CAMK2A_Y106_E109D_YF	IVAREYFSDAD	CAMK2A_Y106_YF	IVAREYFSEAD	E	3	D	0.416498	0.654191	0.329217	0.466635	0.168189	0.642988	0.657753	0.3979	0.566214	0.145951	-1.16	-0.857	-0.3026	0.3747	0.464667	FALSE
CAMK2A_Y230_P235L	IKAGAYDFPSL	CAMK2A_Y230	IKAGAYDFPSP	P	5	L	5.53413	4.08948	4.64886	4.75749	0.728426	5.16093	3.99635	3.30704	4.15477	0.937044	2.239	2.031	0.2084	0.225	0.406616	FALSE
CAMK2B_Y107_E110K	IVAREYYSKAD	CAMK2B_Y107	IVAREYYSEAD	E	3	K	1.38137	2.19107	2.4709	2.01445	0.565829	2.49287	2.79602	4.29988	3.19625	0.967712	0.9676	1.635	-0.6676	0.3503	0.129357	FALSE
CAMK2B_Y107_E110K_YF	IVAREYFSKAD	CAMK2B_Y107_YF	IVAREYFSEAD	E	3	K	0.568409	0.586867	0.262711	0.472662	0.182057	0.642988	0.657753	0.3979	0.566214	0.145951	-1.171	-0.857	-0.3138	0.4468	0.521202	FALSE
CAMKK2_Y128_C123Y	YPSLPYSPVSS	CAMKK2_Y128	CPSLPYSPVSS	C	-5	Y	0.733431	0.693138	0.577295	0.667954	0.0810568	0.754572	0.679217	0.701782	0.711857	0.0386749	-0.5896	-0.4917	-0.09781	0.1135	0.437262	FALSE
CAMKK2_Y128_P127L	CPSLLYSPVSS	CAMKK2_Y128	CPSLPYSPVSS	P	-1	L	0.701464	0.613869	1.88781	1.06772	0.711575	0.754572	0.679217	0.701782	0.711857	0.0386749	-0.09961	-0.4917	0.3921	0.5132	0.487364	FALSE
CAMKK2_Y128_C123Y_YF	FPSLPYSPVSS	CAMKK2_Y128	CPSLPYSPVSS	C	-5	F	0.743617	0.701129	0.57087	0.671872	0.0900132	0.754572	0.679217	0.701782	0.711857	0.0386749	-0.5828	-0.4917	-0.09105	0.124	0.503522	FALSE
CAMKK2_Y183_A182T	VVKLTYNENDN	CAMKK2_Y183	VVKLAYNENDN	A	-1	T	0.440675	0.541913	0.423278	0.468622	0.0640652	0.539159	0.48595	0.199897	0.408335	0.182462	-1.102	-1.418	0.3162	0.4675	0.535866	FALSE
CAMKV_Y491_Y491C	EEAAGCAQESQ	CAMKV_Y491	EEAAGYAQESQ	Y	0	C	1.09709	0.853353	0.420318	0.790254	0.34277	0.71836	0.827752	0.185254	0.577122	0.343747	-0.4485	-1.061	0.6123	0.8035	0.488489	FALSE
CAMKV_Y95_R92H	VTHKEYFIFLE	CAMKV_Y95	VTRKEYFIFLE	R	-3	H	0.852546	1.15187	1.94959	1.318	0.567079	0.973964	0.708383	1.40988	1.03074	0.35418	0.3123	-0.01329	0.3256	0.4516	0.510753	FALSE
CAP2_Y316_T311A	ASPKSYPSQKH	CAP2_Y316	TSPKSYPSQKH	T	-5	A	0.551441	0.392447	0.212589	0.385492	0.169533	0.577854	0.597347	0.438866	0.538022	0.0864234	-1.481	-0.9076	-0.5731	0.4263	0.250048	FALSE
CAP2_Y316_Y316C	TSPKSCPSQKH	CAP2_Y316	TSPKSYPSQKH	Y	0	C	0.810129	0.97423	0.493944	0.759434	0.244123	0.577854	0.597347	0.438866	0.538022	0.0864234	-0.453	-0.9076	0.4546	0.3247	0.234161	FALSE
CAPN1_Y494_G492R	LPPREYVVVPS	CAPN1_Y494	LPPGEYVVVPS	G	-2	R	1.13507	1.4525	0.935709	1.17443	0.260632	1.09552	0.614916	0.655914	0.788782	0.266429	0.2085	-0.3928	0.6013	0.3212	0.134535	FALSE
CARD11_Y970_R975W	LVRAFYCERRW	CARD11_Y970	LVRAFYCERRR	R	5	W	0.579631	0.563331	0.327698	0.49022	0.140984	0.297956	0.369522	0.0603833	0.24262	0.161828	-1.075	-2.411	1.336	0.8666	0.197988	FALSE
CARD9_Y76_G72S	TSHKGYVAFLE	CARD9_Y76	TGHKGYVAFLE	G	-4	S	2.67187	2.87071	2.37757	2.64005	0.248107	1.88154	2.18649	1.73422	1.93408	0.230668	1.396	0.9449	0.4513	0.126	0.023106	FALSE
CARMIL1_Y637_A639G	MPIPMYDGSQA	CARMIL1_Y637	MPIPMYDASQA	A	2	G	0.491254	0.482275	0.382428	0.451986	0.060406	0.574097	0.564493	0.473468	0.537353	0.0555335	-1.155	-0.9014	-0.2533	0.1463	0.158475	FALSE
CASD1_Y382_R386S	IMAYFYMCDSA	CASD1_Y382	IMAYFYMCDRA	R	4	S	0.522542	0.644477	0.865307	0.677442	0.173744	0.914276	0.771332	0.92328	0.869629	0.0852474	-0.593	-0.2063	-0.3866	0.2272	0.164076	FALSE
CASD1_Y382_R386S_YF	IMAFFYMCDSA	CASD1_Y382_YF	IMAFFYMCDRA	R	4	S	0.313004	0.453213	0.886349	0.550855	0.298884	0.412673	0.646728	0.864613	0.641338	0.226018	-0.9972	-0.7052	-0.292	0.538	0.616169	FALSE
CASK_Y708_D710G	KKKKQYKGKYL	CASK_Y708	KKKKQYKDKYL	D	2	G	0.496594	0.375256	0.43643	0.436093	0.0606693	0.397275	0.269312	0.159009	0.275199	0.119242	-1.207	-1.959	0.7524	0.4002	0.133287	FALSE
CASK_Y708_D710G_YF	KKKKQYKGKFL	CASK_Y708_YF	KKKKQYKDKFL	D	2	G	0.985242	0.325222	0.234845	0.515103	0.409652	0.415611	0.471361	0.472397	0.453123	0.0324907	-1.244	-1.145	-0.09948	0.6291	0.882016	FALSE
CASK_Y712_D710G	QYKGKYLAKHN	CASK_Y712	QYKDKYLAKHN	D	-2	G	0.525428	0.896021	1.74704	1.05616	0.626352	0.669094	0.535223	1.8579	1.02074	0.728085	-0.09397	-0.1959	0.102	0.7462	0.897911	FALSE
CASK_Y712_D710G_YF	QFKGKYLAKHN	CASK_Y712_YF	QFKDKYLAKHN	D	-2	G	0.813468	0.857193	1.81503	1.1619	0.566054	0.587276	0.597347	1.55662	0.913747	0.556765	0.1133	-0.2909	0.4042	0.5965	0.535178	FALSE
CASP10_Y9_K14T	QGQHWYSSSDT	CASP10_Y9	QGQHWYSSSDK	K	5	T	1.20151	1.33806	2.04887	1.52948	0.454959	1.08348	1.24683	1.28927	1.20652	0.108653	0.5733	0.2668	0.3064	0.2473	0.283078	FALSE
CASP5_Y103_T106A	EEKKKYYDAKI	CASP5_Y103	EEKKKYYDTKI	T	3	A	0.353133	0.820203	0.390296	0.521211	0.259601	0.343101	0.649456	0.303158	0.431905	0.18946	-1.048	-1.296	0.2476	0.5129	0.65447	FALSE
CASP5_Y103_T106A_YF	EEKKKYFDAKI	CASP5_Y103_YF	EEKKKYFDTKI	T	3	A	0.384032	0.560803	0.392078	0.445638	0.0998174	0.430381	0.51571	0.438647	0.461579	0.0470602	-1.189	-1.12	-0.06846	0.1957	0.744114	FALSE
CASP5_Y104_T106A	EKKKYYDAKIE	CASP5_Y104	EKKKYYDTKIE	T	2	A	0.370188	0.565058	0.632206	0.522484	0.136098	0.275587	0.775765	0.444026	0.498459	0.254493	-0.9729	-1.132	0.1594	0.4913	0.761844	FALSE
CASP5_Y104_T106A_YF	EKKKFYDAKIE	CASP5_Y104_YF	EKKKFYDTKIE	T	2	A	0.457876	0.588934	0.310872	0.452561	0.139107	0.322426	0.627214	0.33127	0.42697	0.173473	-1.192	-1.3	0.1078	0.4126	0.806773	FALSE
CASP5_Y74_L75R	VKMLEYRGKDV	CASP5_Y74	VKMLEYLGKDV	L	1	R	0.36003	0.526248	0.272587	0.386289	0.128853	0.45513	0.415445	0.297763	0.389446	0.081842	-1.425	-1.384	-0.04151	0.332	0.906551	FALSE
CASQ1_Y43_D44N	LDFPEYNGVDR	CASQ1_Y43	LDFPEYDGVDR	D	1	N	1.15961	1.23625	0.528599	0.97482	0.388334	0.981503	0.517701	0.376601	0.625268	0.316472	-0.1334	-0.7952	0.6618	0.5661	0.307253	FALSE
CASQ2_Y178_K180R	SEDSEYYRAFE	CASQ2_Y178	SEDSEYYKAFE	K	2	R	0.451579	0.588497	0.370458	0.470178	0.110203	0.597452	0.713112	0.363734	0.558099	0.177982	-1.115	-0.8966	-0.2182	0.3492	0.565955	FALSE
CASQ2_Y178_K180R_YF	SEDSEYFRAFE	CASQ2_Y178_YF	SEDSEYFKAFE	K	2	R	0.372445	0.57425	0.370058	0.438918	0.117207	0.79455	0.615869	0.220714	0.543711	0.293644	-1.22	-1.07	-0.1495	0.6025	0.816252	FALSE
CASQ2_Y179_K180R	EDSEYYRAFEE	CASQ2_Y179	EDSEYYKAFEE	K	1	R	0.486982	0.445413	0.301281	0.411225	0.0974568	0.643585	0.814564	0.384829	0.614326	0.216356	-1.312	-0.7698	-0.5421	0.3838	0.230649	FALSE
CASQ2_Y179_K180R_YF	EDSEFYRAFEE	CASQ2_Y179_YF	EDSEFYKAFEE	K	1	R	0.722318	1.19635	0.33392	0.750864	0.431925	0.590237	0.60108	0.326914	0.506077	0.155254	-0.5977	-1.036	0.4383	0.6082	0.510962	FALSE
CAT_Y358_R363C	GRLFAYPDTHC	CAT_Y358	GRLFAYPDTHR	R	5	C	0.439607	0.571638	0.580582	0.530609	0.0789368	0.539851	0.498149	0.486321	0.508107	0.0281201	-0.9257	-0.9782	0.05259	0.1379	0.722374	FALSE
CAT_Y386_Q387H	ARVANYHRDGP	CAT_Y386	ARVANYQRDGP	Q	1	H	0.484269	0.669657	0.316262	0.490063	0.176769	0.472435	0.191354	0.296406	0.320065	0.142026	-1.095	-1.741	0.6455	0.4898	0.257994	FALSE
CBFB_Y96_P100A	EAGKVYLKAAM	CBFB_Y96	EAGKVYLKAPM	P	4	A	0.46977	0.513175	0.402492	0.461813	0.0557689	0.388638	0.873454	0.246208	0.502767	0.328829	-1.122	-1.194	0.07178	0.5439	0.901382	FALSE
CBL_Y368_Q367P	VTQEPYELYCE	CBL_Y368	VTQEQYELYCE	Q	-1	P	0.904143	0.752657	0.429641	0.69548	0.242363	0.649069	0.889894	0.337346	0.625436	0.277031	-0.5914	-0.7865	0.1951	0.5235	0.728242	FALSE
CBL_Y368_Y371H	VTQEQYELHCE	CBL_Y368	VTQEQYELYCE	Y	3	H	0.550073	0.666911	0.495143	0.570709	0.0877239	0.649069	0.889894	0.337346	0.625436	0.277031	-0.8203	-0.7865	-0.03376	0.4309	0.941318	FALSE
CBL_Y368_Q367P_YF	VTQEPYELFCE	CBL_Y368_YF	VTQEQYELFCE	Q	-1	P	0.682189	0.76026	0.713226	0.718558	0.0393075	0.551059	0.533493	0.918981	0.667844	0.217668	-0.4783	-0.6294	0.1511	0.2581	0.589693	FALSE
CBL_Y371_Q367P	EPYELYCEMGS	CBL_Y371	EQYELYCEMGS	Q	-4	P	0.414548	0.744498	0.925577	0.694874	0.259104	0.566281	0.552878	0.766554	0.628571	0.119684	-0.6025	-0.6863	0.08376	0.3778	0.8354	FALSE
CBL_Y371_Y371H	EQYELHCEMGS	CBL_Y371	EQYELYCEMGS	Y	0	H	0.632603	0.691063	0.509927	0.611197	0.0924457	0.566281	0.552878	0.766554	0.628571	0.119684	-0.7218	-0.6863	-0.03549	0.1999	0.867753	FALSE
CBL_Y371_Q367P_YF	EPFELYCEMGS	CBL_Y371_YF	EQFELYCEMGS	Q	-4	P	0.417282	0.473485	0.299201	0.396656	0.088954	0.492744	0.427333	0.460766	0.460281	0.0327083	-1.36	-1.122	-0.2383	0.2062	0.312253	FALSE
CBL_Y371_Y371H_YF	EQFELHCEMGS	CBL_Y371_YF	EQFELYCEMGS	Y	0	H	0.506592	0.741612	0.569086	0.605763	0.121727	0.492744	0.427333	0.460766	0.460281	0.0327083	-0.7419	-1.122	0.38	0.1732	0.093265	FALSE
CBLC_Y402_H405Y	EAVSIYQFYGQ	CBLC_Y402	EAVSIYQFHGQ	H	3	Y	0.546253	0.579604	0.596873	0.574243	0.0257321	0.552003	0.548384	0.291913	0.4641	0.149129	-0.8012	-1.167	0.3656	0.3071	0.299757	FALSE
CBLC_Y402_H405Y_YF	EAVSIYQFFGQ	CBLC_Y402	EAVSIYQFHGQ	H	3	F	0.583497	0.628513	0.749158	0.653723	0.0856594	0.552003	0.548384	0.291913	0.4641	0.149129	-0.6213	-1.167	0.5455	0.323	0.166518	FALSE
CBR3_Y81_L84V	FLRKEYGGVNV	CBR3_Y81	FLRKEYGGLNV	L	3	V	0.5297	0.54425	0.300672	0.458207	0.136623	0.37079	0.578366	0.355878	0.435011	0.124372	-1.176	-1.237	0.06122	0.358	0.872533	FALSE
CBS_Y308_G305R	VERIGYDFIPT	CBS_Y308	VEGIGYDFIPT	G	-3	R	4.58893	3.74294	2.12714	3.48634	1.2508	9.94391	7.06079	6.11089	7.7052	1.99611	1.73	2.915	-1.185	0.3917	0.039014	TRUE
CBS_Y308_G307S	VEGISYDFIPT	CBS_Y308	VEGIGYDFIPT	G	-1	S	2.1213	2.50032	1.6981	2.10657	0.401315	9.94391	7.06079	6.11089	7.7052	1.99611	1.057	2.915	-1.858	0.2637	0.002139	TRUE
CBX8_Y321_G317V	SVGGLYRDMGA	CBX8_Y321	SGGGLYRDMGA	G	-4	V	0.339339	0.407421	0.433662	0.393474	0.0486837	0.539582	0.60108	0.484234	0.541632	0.0584502	-1.353	-0.8902	-0.4631	0.1392	0.029192	FALSE
CC2D2A_Y381_E376A	ALETLYKKAVK	CC2D2A_Y381	ELETLYKKAVK	E	-5	A	0.704842	0.540526	0.287243	0.51087	0.210373	0.334156	0.65591	0.384829	0.458299	0.173002	-1.064	-1.189	0.1252	0.4851	0.809021	FALSE
CC2D2A_Y683_L684I	KKRSVYIKVLF	CC2D2A_Y683	KKRSVYLKVLF	L	1	I	0.565981	0.771956	0.305298	0.547745	0.233863	0.677321	0.604612	0.754104	0.678679	0.0747554	-0.9688	-0.5651	-0.4037	0.4039	0.374149	FALSE
CCBE1_Y70_C75S	ELTTCYRKKCS	CCBE1_Y70	ELTTCYRKKCC	C	5	S	0.642402	0.601539	1.88503	1.04299	0.729514	0.751601	1.0499	0.421835	0.741113	0.314165	-0.1524	-0.529	0.3766	0.658	0.597727	FALSE
CCDC102B_Y299_K298R	LWKWRYEELKE	CCDC102B_Y299	LWKWKYEELKE	K	-1	R	2.09472	2.45311	1.69128	2.0797	0.381134	0.934764	0.722247	0.773559	0.81019	0.110893	1.04	-0.3124	1.352	0.1912	0.002108	TRUE
CCDC116_Y291_P293L	LDLPGYCLLRE	CCDC116_Y291	LDLPGYCPLRE	P	2	L	0.587749	0.403029	0.991227	0.660669	0.300802	0.433391	0.836286	0.564646	0.611441	0.205483	-0.6968	-0.7629	0.0661	0.4665	0.894168	FALSE
CCDC137_Y125_H127Q	ESDGAYIQRMQ	CCDC137_Y125	ESDGAYIHRMQ	H	2	Q	0.559428	0.536485	0.308454	0.468122	0.138752	0.534042	0.684234	0.404751	0.541009	0.139872	-1.144	-0.9191	-0.2253	0.3528	0.557796	FALSE
CCDC151_Y542_R545P	GRLPEYNTPIA	CCDC151_Y542	GRLPEYNTRIA	R	3	P	0.692027	0.940822	0.889496	0.840782	0.131356	0.60114	0.520356	0.324105	0.481867	0.142471	-0.2627	-1.101	0.838	0.3017	0.049929	FALSE
CCDC170_Y323_F324S	TSQSQYSSFRE	CCDC170_Y323	TSQSQYFSFRE	F	1	S	0.68861	0.418143	0.882052	0.662935	0.233018	1.11237	0.815889	0.460579	0.796279	0.326338	-0.6591	-0.4195	-0.2396	0.489	0.649781	FALSE
CCDC178_Y422_D420N	AVNNFYAAKKT	CCDC178_Y422	AVNDFYAAKKT	D	-2	N	0.60508	0.653716	0.295702	0.518166	0.194189	0.426344	0.6891	0.256122	0.457189	0.21813	-1.032	-1.244	0.2121	0.5502	0.719455	FALSE
CCDC39_Y593_T594I	RKQQLYIAMEE	CCDC39_Y593	RKQQLYTAMEE	T	1	I	0.999595	0.859516	0.954056	0.937722	0.0714536	2.32822	3.40786	4.00704	3.24771	0.850793	-0.09561	1.664	-1.759	0.2409	0.001871	TRUE
CCDC42_Y149_A144T	TKLKDYYIFNK	CCDC42_Y149	AKLKDYYIFNK	A	-5	T	0.562806	0.855292	1.22063	0.879576	0.329584	1.17504	0.351034	0.943798	0.82329	0.425015	-0.2557	-0.4537	0.198	0.6258	0.76757	FALSE
CCDC42_Y149_A144T_YF	TKLKDYFIFNK	CCDC42_Y149_YF	AKLKDYFIFNK	A	-5	T	0.802495	0.431989	0.937886	0.724123	0.261896	0.79455	0.594692	1.1481	0.845781	0.280239	-0.5403	-0.2941	-0.2462	0.4383	0.604273	FALSE
CCDC60_Y41_I46V	MKSIKYMDKEV	CCDC60_Y41	MKSIKYMDKEI	I	5	V	0.281613	0.611132	0.34774	0.413495	0.174323	0.411721	0.538517	0.265885	0.405374	0.136427	-1.354	-1.361	0.007248	0.4465	0.987826	FALSE
CCDC70_Y125_R126C	TFWKKYCTFWK	CCDC70_Y125	TFWKKYRTFWK	R	1	C	0.625497	0.683416	0.243191	0.517368	0.239204	0.382561	0.627214	0.540632	0.516802	0.124055	-1.089	-0.9822	-0.1065	0.5217	0.848246	FALSE
CCDC82_Y331_Q327R	KRNSLYSFSDH	CCDC82_Y331	KQNSLYSFSDH	Q	-4	R	0.60212	0.575985	0.465934	0.548013	0.0722733	0.387585	0.421488	0.589057	0.466044	0.107873	-0.8765	-1.126	0.2493	0.2169	0.314568	FALSE
CCDC93_Y176_R179C	DLSEVYKPCRK	CCDC93_Y176	DLSEVYKPRRK	R	3	C	0.548962	0.651471	0.383493	0.527975	0.135216	0.382561	0.428865	0.132508	0.314644	0.159425	-0.9554	-1.841	0.8858	0.5846	0.204294	FALSE
CCDC93_Y209_R213C	EYGRRYGFSCQ	CCDC93_Y209	EYGRRYGFSRQ	R	4	C	0.401789	0.523263	0.327656	0.417569	0.0987536	0.747192	0.418143	0.257964	0.474433	0.249425	-1.287	-1.211	-0.0755	0.4847	0.88377	FALSE
CCDC93_Y209_R213C_YF	EFGRRYGFSCQ	CCDC93_Y209_YF	EFGRRYGFSRQ	R	4	C	0.444133	0.548573	0.491197	0.494634	0.0523047	0.441417	0.712744	0.482917	0.545692	0.146151	-1.021	-0.9062	-0.1148	0.2297	0.643485	FALSE
CCNB1IP1_Y125_Y125C	QMEKICTQQIQ	CCNB1IP1_Y125	QMEKIYTQQIQ	Y	0	C	0.461351	0.526975	0.470309	0.486212	0.0355846	0.509008	0.608208	0.318019	0.478412	0.147494	-1.043	-1.115	0.07195	0.2854	0.813384	FALSE
CCPG1_Y569_F566S	TVSSDYLHPQY	CCPG1_Y569	TVFSDYLHPQY	F	-3	S	0.936857	0.959269	0.390296	0.762141	0.322222	0.512613	0.741449	0.369022	0.541028	0.187833	-0.5038	-0.9446	0.4408	0.5165	0.441505	FALSE
CCPG1_Y569_F566S_YF	TVSSDYLHPQF	CCPG1_Y569_YF	TVFSDYLHPQF	F	-3	S	0.633492	0.632716	0.315019	0.527076	0.183647	0.445723	0.582866	0.744629	0.591073	0.149622	-0.9952	-0.79	-0.2052	0.398	0.633364	FALSE
CCR5_Y297_E302G	INPIIYAFVGG	CCR5_Y297	INPIIYAFVGE	E	5	G	0.44347	0.464603	0.565578	0.491217	0.0652599	0.406408	0.550467	0.423458	0.460111	0.0787135	-1.034	-1.133	0.09959	0.1742	0.598212	FALSE
CCR5_Y297_G301V	INPIIYAFVVE	CCR5_Y297	INPIIYAFVGE	G	4	V	0.405301	0.546623	0.253831	0.401918	0.146425	0.406408	0.550467	0.423458	0.460111	0.0787135	-1.384	-1.133	-0.2508	0.35	0.513262	FALSE
CCR5_Y339_A335V	RVSSVYTRSTG	CCR5_Y339	RASSVYTRSTG	A	-4	V	0.76972	0.597347	0.184116	0.517061	0.300944	0.397275	0.791485	0.226706	0.471822	0.289675	-1.187	-1.27	0.08266	0.8224	0.924768	FALSE
CCR5_Y339_Y339F	RASSVFTRSTG	CCR5_Y339	RASSVYTRSTG	Y	0	F	0.483639	0.696905	0.184656	0.455067	0.257317	0.397275	0.791485	0.226706	0.471822	0.289675	-1.335	-1.27	-0.06526	0.7737	0.936832	FALSE
CCRL2_Y170_F167Y	PEYVVYKPQME	CCRL2_Y170	PEFVVYKPQME	F	-3	Y	0.463487	0.581764	0.270316	0.438522	0.157218	0.758019	0.791324	0.356913	0.635419	0.241767	-1.259	-0.7412	-0.5182	0.4966	0.355695	FALSE
CCRL2_Y170_V168M	PEFMVYKPQME	CCRL2_Y170	PEFVVYKPQME	V	-2	M	0.670953	0.425479	0.274455	0.456962	0.200115	0.758019	0.791324	0.356913	0.635419	0.241767	-1.225	-0.7412	-0.4834	0.527	0.410907	FALSE
CCT6A_Y229_Y229C	RVEDACILTCN	CCT6A_Y229	RVEDAYILTCN	Y	0	C	0.603858	0.858686	0.507607	0.656717	0.181411	0.79455	0.70672	0.510622	0.670631	0.145364	-0.6419	-0.6008	-0.04116	0.2936	0.895272	FALSE
CCT6B_Y250_G247A	NSAFFYKTAEE	CCT6B_Y250	NSGFFYKTAEE	G	-3	A	0.475172	0.72907	0.491058	0.5651	0.142224	0.382188	0.607166	0.648269	0.545875	0.143238	-0.8518	-0.9109	0.05914	0.3113	0.858587	FALSE
CCT7_Y263_T259A	HAVEDYQAIVD	CCT7_Y263	HTVEDYQAIVD	T	-4	A	0.774686	0.75124	0.56121	0.695712	0.117071	0.498903	0.674731	0.220714	0.464783	0.228923	-0.5381	-1.25	0.7121	0.5038	0.230413	FALSE
CD19_Y378_G373S	STAPSYGNPSS	CD19_Y378	GTAPSYGNPSS	G	-5	S	0.508791	0.591168	0.273385	0.457781	0.164918	0.451877	0.60623	0.292655	0.450254	0.156793	-1.201	-1.214	0.01219	0.4573	0.980008	FALSE
CD200R1L_Y138_H135R	NFRRGYHLQVL	CD200R1L_Y138	NFHRGYHLQVL	H	-3	R	0.765831	0.804528	0.687959	0.752773	0.0593716	0.622534	0.535746	0.461439	0.539906	0.080628	-0.4128	-0.9	0.4872	0.1414	0.026163	FALSE
CD207_Y217_P213S	ISKTWYSAEQF	CD207_Y217	IPKTWYSAEQF	P	-4	S	0.696052	0.713112	0.65797	0.689045	0.028231	0.704388	0.625792	0.39093	0.573704	0.163092	-0.5381	-0.8456	0.3075	0.2617	0.305211	FALSE
CD209_Y239_L242V	KQQEIYQEVTQ	CD209_Y239	KQQEIYQELTQ	L	3	V	0.726928	0.515793	0.296716	0.513146	0.215118	0.510782	0.719595	0.523192	0.584523	0.11714	-1.056	-0.7929	-0.2632	0.4089	0.554866	FALSE
CD3D_Y149_Q147R	RNDRVYQPLRD	CD3D_Y149	RNDQVYQPLRD	Q	-2	R	0.82836	0.995578	1.00517	0.943035	0.0994268	1.05364	0.444833	0.491058	0.663178	0.338941	-0.09021	-0.7064	0.6162	0.4034	0.201358	FALSE
CD3E_Y199_Q204E	GQRDLYSGLNE	CD3E_Y199	GQRDLYSGLNQ	Q	5	E	0.857395	0.714022	0.599827	0.723748	0.129059	0.587967	1.19171	0.685308	0.821661	0.324145	-0.4818	-0.3528	-0.129	0.3435	0.726311	FALSE
CD44_Y412_K417R	RWHEGYRQTPR	CD44_Y412	RWHEGYRQTPK	K	5	R	0.79455	0.646221	3.66261	1.70113	1.70031	0.539694	0.570195	1.58287	0.897585	0.593667	0.3037	-0.3459	0.6496	0.9369	0.526213	FALSE
CD5_Y465_H461R	SRLSAYPALEG	CD5_Y465	SHLSAYPALEG	H	-4	R	0.521423	0.430814	0.359499	0.437246	0.0811533	0.568937	0.93907	0.34652	0.618176	0.299328	-1.21	-0.8111	-0.399	0.4431	0.418852	FALSE
CD5_Y465_Y465F	SHLSAFPALEG	CD5_Y465	SHLSAYPALEG	Y	0	F	0.643207	0.72907	0.216153	0.529477	0.274721	0.568937	0.93907	0.34652	0.618176	0.299328	-1.101	-0.8111	-0.2897	0.6947	0.698099	FALSE
CD55_Y245_R240H	HDHYGYRQSVT	CD55_Y245	RDHYGYRQSVT	R	-5	H	0.589505	0.587179	0.784446	0.65371	0.113227	0.332602	0.594468	0.524207	0.483759	0.135538	-0.6269	-1.09	0.4631	0.2897	0.185069	FALSE
CD55_Y245_R240H_YF	HDHFGYRQSVT	CD55_Y245_YF	RDHFGYRQSVT	R	-5	H	0.518664	0.642512	0.72277	0.627982	0.102826	0.538528	0.555121	0.791867	0.628505	0.141718	-0.6846	-0.6929	0.008327	0.227	0.972494	FALSE
CD55_Y266_C267S	GEHSIYSTVNN	CD55_Y266	GEHSIYCTVNN	C	1	S	0.692027	0.847436	0.613997	0.71782	0.118838	0.269339	0.459137	0.712668	0.480382	0.222427	-0.4912	-1.168	0.6769	0.4279	0.188889	FALSE
CD59_Y86_C89Y	ENELTYYCYKK	CD59_Y86	ENELTYYCCKK	C	3	Y	0.316709	0.643807	0.389615	0.450044	0.171718	0.68189	0.472014	0.295303	0.483069	0.19353	-1.218	-1.132	-0.08624	0.463	0.861303	FALSE
CD59_Y86_C89Y_YF	ENELTYFCFKK	CD59_Y86_YF	ENELTYFCCKK	C	3	F	0.437002	0.289802	0.514442	0.413749	0.114111	0.93739	0.86018	0.336726	0.711432	0.326793	-1.313	-0.627	-0.6864	0.5333	0.26753	FALSE
CD59_Y87_C89Y	NELTYYCYKKD	CD59_Y87	NELTYYCCKKD	C	2	Y	0.470721	0.556263	0.418578	0.481854	0.0695141	0.443336	0.420912	0.448354	0.437534	0.0146121	-1.063	-1.193	0.1299	0.1223	0.348165	FALSE
CD59_Y87_C89Y_YF	NELTFYCFKKD	CD59_Y87_YF	NELTFYCCKKD	C	2	F	0.469507	0.583562	0.157662	0.403577	0.220472	0.502917	0.625688	0.381622	0.503409	0.122034	-1.511	-1.019	-0.4917	0.6195	0.471816	FALSE
CDA_Y79_V75I	AISEGYKDFRA	CDA_Y79	AVSEGYKDFRA	V	-4	I	0.334547	0.311176	0.284187	0.30997	0.0252018	0.361159	0.481215	0.312536	0.38497	0.0868238	-1.693	-1.401	-0.2922	0.1952	0.208844	FALSE
CDAN1_Y712_R714W	VPLLEYYWDIF	CDAN1_Y712	VPLLEYYRDIF	R	2	W	1.01571	0.836286	1.51123	1.12107	0.349588	0.788834	1.04814	1.32323	1.0534	0.267239	0.1201	0.04323	0.07686	0.3312	0.827859	FALSE
CDAN1_Y712_R714W_YF	VPLLEYFWDIF	CDAN1_Y712_YF	VPLLEYFRDIF	R	2	W	1.35148	1.33942	2.34083	1.67724	0.574714	0.740599	1.18753	1.45507	1.12773	0.360969	0.6944	0.1186	0.5758	0.3927	0.216493	FALSE
CDAN1_Y713_R714W	PLLEYYWDIFT	CDAN1_Y713	PLLEYYRDIFT	R	1	W	0.853405	0.782332	1.24027	0.95867	0.246451	0.715095	0.824671	1.5852	1.04166	0.473902	-0.09073	-0.03241	-0.05832	0.4082	0.893296	FALSE
CDAN1_Y713_R714W_YF	PLLEFYWDIFT	CDAN1_Y713_YF	PLLEFYRDIFT	R	1	W	0.278789	0.817702	0.483747	0.526746	0.272017	0.621193	0.394913	0.402313	0.472806	0.12856	-1.06	-1.114	0.05337	0.4964	0.919566	FALSE
CDC14A_Y591_S589F	SLQFEYVHYGG	CDC14A_Y591	SLQSEYVHYGG	S	-2	F	0.662125	0.861628	0.304486	0.609413	0.282286	0.538243	0.560489	0.50088	0.533204	0.0301228	-0.8417	-0.9088	0.06704	0.453	0.889491	FALSE
CDC14A_Y591_S589F_YF	SLQFEYVHFGG	CDC14A_Y591_YF	SLQSEYVHFGG	S	-2	F	0.683484	0.726865	0.519368	0.643239	0.109446	0.608327	0.716816	0.562649	0.629264	0.0791878	-0.6515	-0.6757	0.02422	0.1812	0.900095	FALSE
CDC14C_Y132_P131S	FGDTSYIPFRD	CDC14C_Y132	FGDTPYIPFRD	P	-1	S	0.822429	0.466623	0.319994	0.536349	0.258373	0.900907	0.631481	0.272587	0.601658	0.315219	-1.009	-0.8963	-0.1122	0.6466	0.87065	FALSE
CDC42_Y64_Y64C	AGQEDCDRLRP	CDC42_Y64	AGQEDYDRLRP	Y	0	C	0.545411	0.907597	0.19205	0.548353	0.357782	0.700705	0.650279	0.477028	0.609338	0.117324	-1.132	-0.7339	-0.3977	0.681	0.590562	FALSE
CDC5L_Y459_Y459C	DGMADCSDPSY	CDC5L_Y459	DGMADYSDPSY	Y	0	C	0.638756	0.88719	0.32034	0.615429	0.284144	0.560367	0.531287	0.284678	0.458777	0.151474	-0.8206	-1.187	0.3663	0.5347	0.530952	FALSE
CDC5L_Y459_Y459C_YF	DGMADCSDPSF	CDC5L_Y459_YF	DGMADYSDPSF	Y	0	C	0.652435	0.945197	0.30624	0.634624	0.319851	0.58267	0.667561	0.422197	0.557476	0.124607	-0.8016	-0.8688	0.06721	0.517	0.902853	FALSE
CDC5L_Y464_Y459C	CSDPSYVKQME	CDC5L_Y464	YSDPSYVKQME	Y	-5	C	0.419001	0.62284	0.502714	0.514852	0.10246	1.16046	0.887908	1.09166	1.04668	0.141735	-0.9767	0.05657	-1.033	0.2024	0.006958	FALSE
CDC73_Y290_R292K	PIPAAYNKYDQ	CDC73_Y290	PIPAAYNRYDQ	R	2	K	0.58267	0.532182	0.318019	0.477623	0.140508	0.576267	0.621854	0.301793	0.499971	0.173134	-1.114	-1.07	-0.04439	0.4284	0.922455	FALSE
CDC73_Y290_R292K_YF	PIPAAYNKFDQ	CDC73_Y290_YF	PIPAAYNRFDQ	R	2	K	0.771181	0.478899	0.277247	0.509109	0.248349	0.474523	0.85046	0.412247	0.579076	0.237079	-1.096	-0.8625	-0.2334	0.533	0.684045	FALSE
CDC73_Y293_R292K	AAYNKYDQERF	CDC73_Y293	AAYNRYDQERF	R	-1	K	0.702871	0.758692	0.279402	0.580322	0.262094	0.466497	0.763751	0.259954	0.496734	0.253256	-0.9156	-1.144	0.2286	0.6453	0.741003	FALSE
CDC73_Y293_R292K_YF	AAFNKYDQERF	CDC73_Y293_YF	AAFNRYDQERF	R	-1	K	0.626292	0.426676	0.265885	0.439618	0.180552	0.487324	0.61268	0.242931	0.447645	0.188041	-1.272	-1.262	-0.009928	0.5374	0.986146	FALSE
CDCP1_Y707_D709G	PAVGIYNGNIN	CDCP1_Y707	PAVGIYNDNIN	D	2	G	0.328779	0.80841	0.183472	0.44022	0.327034	0.695231	0.46832	0.278713	0.480755	0.208537	-1.453	-1.154	-0.2987	0.7301	0.703441	FALSE
CDH1_Y68_D72N	RQRTAYFSLNT	CDH1_Y68	RQRTAYFSLDT	D	4	N	0.716076	0.662909	1.23525	0.871412	0.316214	1.93793	1.61388	1.66137	1.73773	0.174995	-0.2567	0.7925	-1.049	0.2942	0.02346	FALSE
CDH1_Y876_E880K	KLADMYGGGKD	CDH1_Y876	KLADMYGGGED	E	4	K	0.447416	0.499365	0.289345	0.412042	0.109387	0.56123	0.666068	0.447214	0.558171	0.109459	-1.317	-0.8602	-0.4569	0.2924	0.19319	FALSE
CDH13_Y66_R65C	NDKLCYEVSSP	CDH13_Y66	NDKLRYEVSSP	R	-1	C	0.410742	0.418143	0.410871	0.413252	0.00423625	0.538431	0.619835	0.260797	0.473021	0.188244	-1.275	-1.174	-0.1009	0.387	0.807214	FALSE
CDH17_Y489_K486E	SSEILYHIIKG	CDH17_Y489	SSKILYHIIKG	K	-3	E	2.53698	2.6506	1.99897	2.39552	0.348085	6.04038	7.22061	6.50348	6.58816	0.594654	1.25	2.716	-1.466	0.1469	0.000566	TRUE
CDH17_Y489_S484I	ISKILYHIIKG	CDH17_Y489	SSKILYHIIKG	S	-5	I	4.00518	1.81949	3.25045	3.02504	1.11014	6.04038	7.22061	6.50348	6.58816	0.594654	1.522	2.716	-1.194	0.3486	0.026662	TRUE
CDH4_Y205_T208M	DIPIRYSIMGV	CDH4_Y205	DIPIRYSITGV	T	3	M	1.55689	1.54214	0.838646	1.31256	0.410486	0.621618	0.595974	0.37285	0.530147	0.136826	0.3366	-0.952	1.289	0.3782	0.027098	FALSE
CDH5_Y223_V227E	EKQARYEIVEE	CDH5_Y223	EKQARYEIVVE	V	4	E	20.8262	15.8894	19.7154	18.8104	2.58985	11.734	8.60994	12.788	11.044	2.17283	4.224	3.445	0.7787	0.2103	0.020781	FALSE
CDH5_Y82_N79T	RKTAKYLLKGE	CDH5_Y82	RKNAKYLLKGE	N	-3	T	0.503215	0.613276	0.265016	0.460502	0.178016	0.882833	0.484165	0.878736	0.748578	0.228997	-1.204	-0.4709	-0.7331	0.4651	0.190075	FALSE
CDK11B_Y449_V452A	IEEGTYGVAYR	CDK11B_Y449	IEEGTYGVVYR	V	3	A	0.442286	0.61581	0.355816	0.471304	0.132404	0.520797	0.586749	0.245139	0.450895	0.181215	-1.122	-1.246	0.1238	0.4564	0.799556	FALSE
CDK11B_Y449_V452A_YF	IEEGTYGVAFR	CDK11B_Y449_YF	IEEGTYGVVFR	V	3	A	0.413828	0.547523	0.159628	0.37366	0.197043	0.334319	0.433488	0.280605	0.34947	0.0775595	-1.596	-1.54	-0.05636	0.5682	0.925759	FALSE
CDK11B_Y453_V452A	TYGVAYRAKDK	CDK11B_Y453	TYGVVYRAKDK	V	-1	A	0.599169	0.566516	0.273937	0.479874	0.179092	0.626009	0.608208	0.238514	0.49091	0.218763	-1.142	-1.154	0.01137	0.5842	0.985409	FALSE
CDK11B_Y453_V452A_YF	TFGVAYRAKDK	CDK11B_Y453_YF	TFGVVYRAKDK	V	-1	A	0.783956	0.477878	0.260197	0.507343	0.26312	0.364558	0.52445	0.388961	0.42599	0.0861378	-1.12	-1.25	0.1301	0.4877	0.802764	FALSE
CDK13_Y351_P356A	GGSSPYSRRLA	CDK13_Y351	GGSSPYSRRLP	P	5	A	0.707237	0.923804	0.219783	0.616941	0.360592	0.577237	0.47683	0.519486	0.524518	0.0503924	-0.9333	-0.9354	0.002045	0.6411	0.997608	FALSE
CDK13_Y399_L403F	RSRSPYSPVFR	CDK13_Y399	RSRSPYSPVLR	L	4	F	0.409562	0.698545	0.280212	0.462773	0.214182	0.715095	1.08717	0.176677	0.659648	0.457773	-1.214	-0.9547	-0.2589	0.8799	0.783179	FALSE
CDK13_Y415_R410Q	QSRSPYSSRHS	CDK13_Y415	RSRSPYSSRHS	R	-5	Q	1.0594	0.321648	0.265687	0.548912	0.44298	0.545279	0.44274	0.312237	0.433418	0.116801	-1.155	-1.243	0.0881	0.6669	0.901288	FALSE
CDK13_Y716_G714R	IGERTYGQVYK	CDK13_Y716	IGEGTYGQVYK	G	-2	R	0.660585	0.635886	0.39788	0.564783	0.145069	0.539159	0.612281	0.262711	0.471384	0.184377	-0.8603	-1.176	0.3155	0.4469	0.519181	FALSE
[truncated: 4,735 more rows]

## Sheet: SHP2-C
variant name	variant seq	reference name	reference seq	ref. AA	pos.	var. AA	var. enrich. R1	var. enrich. R2	var. enrich. R3	var. mean	var. stdev	ref. enrich. R1	ref. enrich. R2	ref. enrich. R3	ref. mean	ref. stdev	mean of log2(variant)	mean of log2(reference)	difference	SE of difference	p-value	hit?
[truncated: 5,554 more rows]

[truncated: 1 more sheets: Grb2]
